# Supplementary material
Source: publisher figshare collection journal article supplement (https://gsapubs.figshare.com/articles/dataset/_/15167367)
Supplement: Supplementary file 1 [file 1]

Supplemental Item S11 - Detrital sand-sized volcanic-lithic <sup>40</sup>Ar/<sup>39</sup>Ar (DARL) fusion ages from modern rivers, Wrangell Arc, Wrangell-St. Elias Mountains, Alaska-Canada

## BOULDER CREEK

Weighted average of J from standards = 1.347e-04 2.749e-06

| Grain # | Cumulative 40Ar/39Ar meas. |          | 37Ar/39Ar meas. |         | 36Ar/39Ar meas. |          | % Atm. 40Ar | Ca/K     | Cl/K     | 40*/39K  |         | Age (Ma) | (Ma)    | %error   |           |        |       |           |
|---------|----------------------------|----------|-----------------|---------|-----------------|----------|-------------|----------|----------|----------|---------|----------|---------|----------|-----------|--------|-------|-----------|
| 1       | 0.0178                     | 11.71061 | 0.28222         | 0.54391 | 0.07881         | 0.03397  | 0.00838     | 85.5616  | 21.123   | 0.99838  | 0.14471 | 0.03625  | 0.0026  | 1.68719  | 2.46938   | 0.41   | 0.6   | 146.34    |
| 2       | 0.0408                     | 3.9751   | 0.08163         | 0.47118 | 0.0929          | 0.0078   | 0.00621     | 57.41749 | 46.54556 | 0.86483  | 0.17058 | 0.00412  | 0.0019  | 1.68061  | 1.83792   | 0.41   | 0.45  | 109.76    |
| 3       | 0.0561                     | 73.30415 | 2.19846         | 1.53865 | 0.16266         | 0.23011  | 0.01435     | 92.6262  | 5.08707  | 2.82629  | 0.29912 | 0.02953  | 0.00357 | 5.40899  | 3.73583   | 1.31   | 0.91  | 69.47     |
| 4       | 0.0722                     | 64.15777 | 1.19933         | 2.43551 | 0.14285         | 0.22025  | 0.01127     | 101.1779 | 4.84484  | 4.47652  | 0.26302 | 0.0248   | 0.00297 | -0.75665 | 3.11224   | -0.18  | 0.76  | -422.22   |
| 5       | 0.0832                     | 19.21514 | 0.60757         | 2.78849 | 0.21871         | 0.06442  | 0.0144      | 98.02478 | 21.98165 | 5.12658  | 0.40288 | 0.02315  | 0.00363 | 0.3797   | 4.22578   | 0.09   | 1.03  | 1144.44   |
| 6       | 0.1119                     | 30.18829 | 0.33766         | 0.54566 | 0.05557         | 0.10032  | 0.00655     | 98.14729 | 6.34032  | 1.0016   | 0.10203 | 0.03     | 0.00174 | 0.55897  | 1.91298   | 0.14   | 0.46  | 328.57    |
| 7       | 0.1707                     | 13.68587 | 0.17581         | 0.14571 | 0.0522          | 0.03889  | 0.00357     | 84.05528 | 7.66243  | 0.26739  | 0.0958  | 0.00514  | 0.00068 | 2.17766  | 1.04737   | 0.53   | 0.25  | 47.17     |
| 8       | 0.1854                     | 702.1165 | 27.74833        | 1.18672 | 0.21416         | 2.39245  | 0.09725     | 100.6813 | 0.9884   | 2.17929  | 0.39361 | 0.02549  | 0.00357 | -4.78735 | 6.94631   | -1.16  | 1.69  | -145.69   |
| 9       | 0.1965                     | 29.27055 | 1.51551         | 1.63825 | 0.30411         | 0.0816   | 0.01466     | 81.99958 | 14.21478 | 3.00944  | 0.55929 | 0.02555  | 0.00355 | 5.26958  | 4.17201   | 1.28   | 1.01  | 78.91     |
| 10      | 0.2142                     | 13.89006 | 0.43761         | 1.65153 | 0.19591         | 0.02476  | 0.00879     | 51.81386 | 18.68771 | 3.03386  | 0.36031 | 0.03817  | 0.0027  | 6.68659  | 2.60345   | 1.62   | 0.63  | 38.89     |
| 11      | 0.2236                     | 70.81104 | 4.3228          | 2.97196 | 0.38611         | 0.22387  | 0.02022     | 93.11776 | 6.22689  | 5.46461  | 0.71145 | 0.01076  | 0.00496 | 4.88159  | 4.42741   | 1.18   | 1.07  | 90.68     |
| 12      | 0.2306                     | 46.60685 | 3.01195         | 1.4354  | 0.43466         | 0.14225  | 0.0224      | 89.9937  | 12.98344 | 2.63643  | 0.79916 | 0.02274  | 0.00683 | 4.66538  | 6.0625    | 1.13   | 1.47  | 130.09    |
| 13      | 0.2436                     | 6.24775  | 0.26252         | 0.92326 | 0.2137          | 0.02872  | 0.01313     | 135.2582 | 62.28295 | 1.69517  | 0.39262 | 0.01575  | 0.00465 | -2.19381 | 3.87441   | -0.53  | 0.94  | -177.36   |
| 14      | 0.2638                     | 3.77093  | 0.13488         | 0.44088 | 0.13506         | 0.00982  | 0.00964     | 76.56194 | 76.12263 | 0.8092   | 0.24798 | 0.01225  | 0.00222 | 0.87715  | 2.84961   | 0.21   | 0.69  | 328.57    |
| 15      | 0.2896                     | 45.23268 | 1.18051         | 0.39646 | 0.13325         | 0.16195  | 0.00897     | 105.7974 | 5.18099  | 0.72765  | 0.24664 | 0.0329   | 0.00202 | -2.62135 | 2.34337   | -0.64  | 0.57  | -89.06    |
| 16      | 0.2954                     | 102.4838 | 9.99432         | 2.0244  | 0.52076         | 0.34097  | 0.04429     | 98.1791  | 8.46056  | 3.71981  | 0.95826 | 0.02477  | 0.00791 | 1.86826  | 8.68309   | 0.45   | 2.11  | 468.89    |
| 17      | 0.3163                     | 58.60066 | 1.55417         | 0.98204 | 0.1303          | 0.18705  | 0.01061     | 94.22917 | 4.74937  | 1.80316  | 0.23942 | 0.02906  | 0.00316 | 3.38238  | 2.78585   | 0.82   | 0.68  | 82.93     |
| 18      | 0.3354                     | 5.62752  | 0.16501         | 0.69314 | 0.15903         | 0.02327  | 0.00901     | 121.8312 | 47.4716  | 1.27244  | 0.29208 | 0.0092   | 0.00215 | -1.22267 | 2.65824   | -0.3   | 0.65  | -216.67   |
| 19      | 0.3366                     | 627.9518 | 202.35332       | 7.581   | 3.20703         | 0.49419  | 0.2275      | 23.15708 | 7.64605  | 13.98497 | 5.94798 | 0.04102  | 0.03463 | 485.111  | 164.42396 | 114.07 | 37.46 | 32.84     |
| 20      | 0.3608                     | 102.9313 | 2.20272         | 0.47629 | 0.10706         | 0.35747  | 0.01887     | 102.6155 | 4.9692   | 0.87422  | 0.19658 | 0.03064  | 0.00196 | -2.69231 | 5.11502   | -0.65  | 1.24  | -190.77   |
| 21      | 0.3775                     | 26.13487 | 0.91892         | 2.06993 | 0.1861          | 0.06959  | 0.0129      | 78.11487 | 14.34742 | 3.80359  | 0.34246 | 0.03569  | 0.00386 | 5.72152  | 3.75694   | 1.39   | 0.91  | 65.47     |
| 22      | 0.3944                     | 64.05776 | 1.67157         | 1.43306 | 0.18733         | 0.19919  | 0.01396     | 91.74539 | 5.99035  | 2.63214  | 0.34442 | 0.03089  | 0.00284 | 5.29062  | 3.84265   | 1.28   | 0.93  | 72.66     |
| 23      | 0.4044                     | 4314.396 | 202.62139       | 1.32513 | 0.2379          | 14.90308 | 0.7035      | 102.0718 | 0.51185  | 2.4337   | 0.43733 | 0.0243   | 0.00803 | -89.4674 | 22.47879  | -21.85 | 5.52  | -25.26    |
| 24      | 0.4294                     | 6.47888  | 0.25556         | 0.2025  | 0.08974         | 0.01056  | 0.00985     | 48.11384 | 45.14384 | 0.37162  | 0.1647  | 0.00232  | 0.00158 | 3.34671  | 2.91851   | 0.81   | 0.71  | 87.65     |
| 25      | 0.4425                     | 934.5347 | 37.40292        | 1.2149  | 0.26115         | 3.18486  | 0.13035     | 100.6978 | 0.92776  | 2.23109  | 0.48    | 0.03444  | 0.00458 | -6.52682 | 8.67718   | -1.59  | 2.11  | -132.70   |
| 26      | 0.4547                     | 593.3983 | 29.31677        | 2.49046 | 0.33565         | 2.07216  | 0.10454     | 103.1596 | 1.09761  | 4.57771  | 0.61805 | 0.00575  | 0.00451 | -18.781  | 6.58246   | -4.56  | 1.6   | -35.09    |
| 27      | 0.4753                     | 64.00361 | 1.60613         | 0.90324 | 0.19325         | 0.19081  | 0.00981     | 88.02015 | 3.96439  | 1.65837  | 0.35505 | 0.01395  | 0.00228 | 7.66887  | 2.54587   | 1.86   | 0.62  | 33.33     |
| 28      | 0.4897                     | 9.46499  | 0.39109         | 0.62129 | 0.25376         | 0.0153   | 0.01027     | 47.3665  | 32.10358 | 1.14048  | 0.46603 | 0.01539  | 0.0032  | 4.96831  | 3.03861   | 1.21   | 0.74  | 61.16     |
| 29      | 0.5036                     | 665.3221 | 25.19785        | 0.83774 | 0.26711         | 2.26155  | 0.08952     | 100.4398 | 1.20649  | 1.53805  | 0.4907  | 0.03811  | 0.00357 | -2.92737 | 8.03077   | -0.71  | 1.95  | -274.65   |
| 30      | 0.5169                     | 58.59722 | 2.51543         | 0.65759 | 0.25168         | 0.18836  | 0.01324     | 94.94176 | 5.30374  | 1.20715  | 0.46224 | 0.03447  | 0.00489 | 2.96386  | 3.11085   | 0.72   | 0.75  | 104.17    |
| 31      | 0.5223                     | 3.81055  | 0.66            | 1.99938 | 0.43981         | 0.06487  | 0.0324      | 50.6272  | 257.8495 | 3.67377  | 0.80928 | 0.02804  | 0.01126 | -15.2444 | 9.52907   | -3.7   | 2.32  | -62.70    |
| 32      | 0.5506                     | 216.5848 | 5.5041          | 0.41255 | 0.07008         | 0.73452  | 0.01957     | 100.2135 | 0.85715  | 0.7572   | 0.12867 | 0.03367  | 0.00307 | -0.46241 | 1.85654   | -0.11  | 0.45  | -409.09   |
| 33      | 0.5563                     | 113.5206 | 11.22823        | 4.26368 | 0.58831         | 0.42486  | 0.0528      | 110.3132 | 8.34758  | 7.8469   | 1.08599 | 0.0361   | 0.01168 | -11.7399 | 9.57053   | -2.85  | 2.33  | -81.75    |
| 34      | 0.5759                     | 28.11919 | 0.76362         | 1.40125 | 0.1563          | 0.08118  | 0.00724     | 84.99369 | 7.28093  | 2.57365  | 0.28736 | 0.02089  | 0.00375 | 4.21938  | 2.05161   | 1.02   | 0.5   | 49.02     |
| 35      | 0.5944                     | 520.5583 | 16.9732         | 1.51019 | 0.13713         | 1.76968  | 0.05895     | 100.4395 | 0.73444  | 2.77396  | 0.25215 | 0.03608  | 0.00422 | -2.28994 | 3.82669   | -0.56  | 0.93  | -166.07   |
| 36      | 0.6057                     | 9.18567  | 0.59656         | 1.48391 | 0.24258         | 0.05383  | 0.01406     | 172.3898 | 44.50169 | 2.72564  | 0.44603 | 0.0298   | 0.00522 | -6.63496 | 4.08085   | -1.61  | 0.99  | -61.49    |
| 37      | 0.6101                     | 8.48201  | 0.89745         | 0.42295 | 0.63548         | -0.04508 | 0.03423     | -157.999 | 119.1412 | 0.77628  | 1.16671 | 0.00339  | 0.00849 | 21.81342 | 10.24951  | 5.29   | 2.48  | 46.88     |
| 38      | 0.6223                     | 76.22816 | 3.1287          | 4.43917 | 0.33147         | 0.22368  | 0.01559     | 86.26351 | 4.89135  | 8.17087  | 0.61204 | 0.02916  | 0.00362 | 10.49992 | 3.76475   | 2.55   | 0.91  | 35.69     |
| 39      | 0.6363                     | 32.50314 | 1.07308         | 0.56007 | 0.1888          | 0.08972  | 0.01311     | 81.49729 | 11.6302  | 1.02806  | 0.3467  | 0.03189  | 0.00365 | 6.01085  | 3.78408   | 1.46   | 0.92  | 63.01     |
| 40      | 0.6452                     | 138.4006 | 6.92073         | 2.10097 | 0.32637         | 0.44563  | 0.03266     | 95.04227 | 5.10725  | 3.86071  | 0.60063 | 0.05693  | 0.00544 | 6.87025  | 7.08642   | 1.67   | 1.72  | 102.99    |
| 41      | 0.6881                     | 284.2811 | 3.02938         | 0.39526 | 0.07283         | 0.97932  | 0.01546     | 101.7956 | 1.21946  | 0.72545  | 0.13371 | 0.02668  | 0.00142 | -5.10537 | 3.46609   | -1.24  | 0.84  | -67.74    |
| 42      | 0.6935                     | 53.12918 | 6.30762         | 3.27599 | 0.65934         | 0.13454  | 0.03675     | 74.36356 | 18.42975 | 6.02493  | 1.21542 | 0.02924  | 0.00915 | 13.6444  | 9.9453    | 3.31   | 2.41  | 72.81     |
| 43      | 0.723                      | 10.60901 | 0.15161         | 0.46918 | 0.11527         | 0.02239  | 0.0042      | 62.18627 | 11.70141 | 0.86116  | 0.21165 | 0        | 0.00161 | 4.00176  | 1.24054   | 0.97   | 0.3   | 30.93     |
| 44      | 0.7427                     | 19.65515 | 0.49968         | 0.28661 | 0.13541         | 0.05477  | 0.00875     | 82.34117 | 13.01886 | 0.52599  | 0.24856 | 0.03308  | 0.00243 | 3.46633  | 2.55743   | 0.84   | 0.62  | 73.81     |
| 45      | 0.7635                     | 4.27488  | 0.14738         | 0.58526 | 0.12107         | 0.00181  | 0.00547     | 11.44039 | 38.10125 | 1.07431  | 0.22233 | 0.00944  | 0.0023  | 3.76108  | 1.62395   | 0.91   | 0.39  | 42.86     |
| 46      | 0.7735                     | 5.85087  | 0.33374         | 2.92271 | 0.28348         | 0.01126  | 0.01635     | 53.00536 | 82.97594 | 5.37386  | 0.5223  | 0.07397  | 0.006   | 2.74133  | 4.84514   | 0.67   | 1.18  | 176.12    |
| 47      | 0.7886                     | 5.40305  | 0.2337          | 0.67927 | 0.18158         | 0.01122  | 0.01096     | 60.63377 | 60.27442 | 1.24696  | 0.33349 | 0.03205  | 0.00435 | 2.1163   | 3.24297   | 0.51   | 0.79  | 154.90    |
| 48      | 0.8064                     | 2.20869  | 0.12766         | 0.49862 | 0.17427         | -0.00809 | 0.00703     | -111.62  | 95.42447 | 0.91522  | 0.31998 | 0.03221  | 0.00292 | 4.61284  | 2.08319   | 1.12   | 0.51  | 45.54     |
| 49      | 0.8144                     | 14.93273 | 1.28674         | 1.62345 | 0.44713         | 0.07855  | 0.02581     | 154.8602 | 49.55366 | 2.98223  | 0.82231 | 0.03785  | 0.01454 | -8.18524 | 7.41791   | -1.99  | 1.8   | -90.45    |
| 50      | 0.8216                     | 174.0806 | 15.27588        | 4.75466 | 0.59829         | 0.64673  | 0.06093     | 109.576  | 3.78455  | 8.75354  | 1.10519 | 0.0395   | 0.01549 | -16.7233 | 6.76809   | -4.06  | 1.65  | -40.64    |
| 51      | 0.832                      | 32.28032 | 2.08968         | 0.69488 | 0.28642         | 0.10949  | 0.01638     | 100.1462 | 13.56795 | 1.27564  | 0.52606 | 0.02959  | 0.01034 | -0.40719 | 4.37794   | -0.01  | 1.06  | -10600.00 |
| 52      | 0.8508                     | 58.74012 | 2.22061         | 0.54204 | 0.17491         | 0.21329  | 0.01232     | 107.2748 | 4.71061  | 0.99495  | 0.32118 | 0.02237  | 0.00577 | -4.2727  | 2.77055   | -1.04  | 0.    |           |

Integrated 141.0691 0.60124 1.10272 0.02317 0.47482 0.00268 99.41813 0.37459 2.02492 0.04259 0.02454 0.00048 0.82131 0.52881 0.2 0.13 65.00

## DROP CREEK

Weighted average of J from standards = 1.347e-04 2.749e-06

| Grain # | Cumulative 40Ar/39Ar<br>39Ar<br>meas. |          | 37Ar/39Ar<br>meas. |          | 36Ar/39Ar<br>meas. |          | % Atm.<br>40Ar | Ca/K     | Cl/K     | 40*/39K  |          |         | Age<br>(Ma) | (Ma)     | %error   |       |       |          |
|---------|---------------------------------------|----------|--------------------|----------|--------------------|----------|----------------|----------|----------|----------|----------|---------|-------------|----------|----------|-------|-------|----------|
| 1       | 0.0064                                | 22.75187 | 0.50452            | 1.09591  | 0.09198            | 0.07498  | 0.00769        | 97.11971 | 9.77536  | 2.0124   | 0.16903  | 0.03153 | 0.00179     | 0.65497  | 2.22306  | 0.16  | 0.54  | 337.50   |
| 2       | 0.0171                                | 133.6778 | 1.60292            | 1.14993  | 0.05644            | 0.45506  | 0.00888        | 100.5448 | 1.58064  | 2.11167  | 0.10373  | 0.04098 | 0.00153     | -0.72864 | 2.11402  | -0.18 | 0.51  | -283.33  |
| 3       | 0.0198                                | 103.4992 | 4.15335            | 2.63954  | 0.26838            | 0.36662  | 0.02904        | 104.4928 | 7.16384  | 4.85224  | 0.49428  | 0.02533 | 0.0049      | -4.65733 | 7.428    | -1.13 | 1.8   | -159.29  |
| 4       | 0.0205                                | 5385.265 | 14343.536          | -0.71466 | 9.17025            | 18.27796 | 48.68412       | 100.2964 | 1.888368 | -0.31064 | 16.80918 | 0.00875 | 0.17633     | -15.9525 | 109.8912 | -3.88 | 26.73 | -688.92  |
| 5       | 0.0351                                | 5.88722  | 0.09826            | 0.40233  | 0.05018            | 0.10144  | 0.00347        | 52.11122 | 17.51282 | 0.73843  | 0.09212  | 0.00325 | 0.00077     | 2.80589  | 1.02815  | 0.68  | 0.25  | 36.76    |
| 6       | 0.0388                                | 16.216   | 0.67985            | 2.22899  | 0.21255            | 0.05353  | 0.01362        | 96.58579 | 24.56076 | 4.09633  | 0.39123  | 0.02201 | 0.00324     | 0.55351  | 3.98207  | 0.13  | 0.97  | 746.15   |
| 7       | 0.0421                                | 45.95639 | 1.34733            | 0.80053  | 0.26286            | 0.16379  | 0.0145         | 105.2387 | 8.81855  | 1.46969  | 0.48287  | 0.04377 | 0.00386     | -2.40734 | 4.05268  | -0.58 | 0.98  | -168.97  |
| 8       | 0.0457                                | 62.71006 | 2.01077            | 2.13517  | 0.20008            | 0.21253  | 0.01542        | 99.91288 | 6.53056  | 3.92365  | 0.36822  | 0.01896 | 0.00338     | 0.05469  | 4.0996   | 0.01  | 1     | 10000.00 |
| 9       | 0.0623                                | 188.9446 | 2.13799            | 0.35044  | 0.04833            | 0.65989  | 0.00989        | 103.2051 | 1.06851  | 0.64317  | 0.08872  | 0.00859 | 0.00137     | -6.05469 | 2.01717  | -1.47 | 0.49  | -33.33   |
| 10      | 0.0693                                | 7.27032  | 0.20344            | 2.81103  | 0.11963            | 0.02728  | 0.0102         | 108.1465 | 41.63154 | 5.16812  | 0.22037  | 0.03167 | 0.00182     | -0.59103 | 3.01987  | -0.14 | 0.73  | -521.43  |
| 11      | 0.0766                                | 13.20846 | 0.60576            | 3.00076  | 0.25765            | 0.0534   | 0.01017        | 117.8567 | 22.4778  | 5.51768  | 0.47476  | 0.05064 | 0.0046      | -2.3583  | 2.96367  | -0.57 | 0.72  | -126.32  |
| 12      | 0.079                                 | 212.3043 | 15.78356           | 6.0186   | 0.60496            | 0.74315  | 0.06272        | 103.2168 | 4.14142  | 11.09044 | 1.11952  | 0.06937 | 0.00795     | -6.85761 | 8.84294  | -1.67 | 2.15  | -128.74  |
| 13      | 0.0828                                | 16.49564 | 0.60186            | 2.91728  | 0.25674            | 0.03191  | 0.01747        | 55.80493 | 31.28585 | 5.36386  | 0.47303  | 0.04286 | 0.00436     | 7.29218  | 5.17033  | 1.77  | 1.25  | 70.62    |
| 14      | 0.1176                                | 3.06614  | 0.02643            | 0.06854  | 0.02064            | 0.00018  | 0.00195        | 1.57019  | 18.93476 | 0.12576  | 0.03787  | 0.00035 | 0.00035     | 2.98891  | 0.57557  | 0.73  | 0.14  | 19.18    |

|    |        |          |          |         |         |          |         |          |          |         |         |         |         |          |          |       |      |          |
|----|--------|----------|----------|---------|---------|----------|---------|----------|----------|---------|---------|---------|---------|----------|----------|-------|------|----------|
| 15 | 0.1267 | 112.0727 | 2.19739  | 5.13366 | 0.14404 | 0.35495  | 0.0106  | 93.23473 | 2.13365  | 9.45384 | 0.26623 | 0.00776 | 0.00133 | 7.6076   | 2.40601  | 1.85  | 0.58 | 31.35    |
| 16 | 0.1387 | 89.30623 | 1.43708  | 0.96779 | 0.05073 | 0.29965  | 0.00714 | 99.09415 | 1.76771  | 1.77698 | 0.09321 | 0.03471 | 0.00136 | 0.80926  | 1.57949  | 0.2   | 0.38 | 190.00   |
| 17 | 0.1499 | 18.48009 | 0.28876  | 1.45024 | 0.07836 | 0.05176  | 0.00627 | 82.25368 | 9.96611  | 2.66371 | 0.14407 | 0.0224  | 0.00129 | 3.27763  | 1.84166  | 0.8   | 0.45 | 56.25    |
| 18 | 0.1666 | 5.87767  | 0.0776   | 0.05616 | 0.03627 | 0.00852  | 0.00444 | 42.95493 | 22.40776 | 0.10304 | 0.06655 | 0.00446 | 0.0007  | 3.33611  | 1.31144  | 0.81  | 0.32 | 39.51    |
| 19 | 0.1768 | 8.99264  | 0.14006  | 1.63107 | 0.06988 | 0.01523  | 0.00605 | 48.70407 | 19.93323 | 2.99625 | 0.12852 | 0.01321 | 0.00128 | 4.60294  | 1.79048  | 1.12  | 0.43 | 38.39    |
| 20 | 0.1873 | 96.65488 | 1.32863  | 1.4486  | 0.08718 | 0.3302   | 0.00893 | 100.8591 | 2.39483  | 2.66071 | 0.16028 | 0.01899 | 0.00153 | -0.83095 | 2.31606  | -0.2  | 0.56 | -280.00  |
| 21 | 0.1945 | 205.0807 | 5.5138   | 1.90572 | 0.14353 | 0.68154  | 0.02149 | 98.141   | 1.64236  | 3.50144 | 0.26407 | 0.01237 | 0.00181 | 3.81704  | 3.3748   | 0.93  | 0.82 | 88.17    |
| 22 | 0.2082 | 3.20417  | 0.06885  | 1.23798 | 0.07702 | -0.00078 | 0.00579 | -10.4628 | 53.9188  | 2.27352 | 0.14156 | 0.00663 | 0.00087 | 3.50971  | 1.71469  | 0.85  | 0.42 | 49.41    |
| 23 | 0.2293 | 26.78016 | 0.27439  | 0.05844 | 0.04549 | 0.07513  | 0.00438 | 82.97533 | 4.76547  | 0.10724 | 0.08348 | 0.0302  | 0.00108 | 4.55437  | 1.27614  | 1.11  | 0.31 | 27.93    |
| 24 | 0.2395 | 60.7342  | 1.32536  | 0.96757 | 0.09552 | 0.18798  | 0.00888 | 91.37623 | 3.84401  | 1.77658 | 0.17551 | 0.01614 | 0.0013  | 5.2386   | 2.33865  | 1.27  | 0.57 | 44.88    |
| 25 | 0.2491 | 152.2368 | 2.9194   | 2.68784 | 0.12237 | 0.51151  | 0.01406 | 99.16099 | 1.9819   | 4.94119 | 0.22539 | 0.0382  | 0.00158 | 1.27947  | 3.02277  | 0.31  | 0.73 | 235.48   |
| 26 | 0.2554 | 151.9892 | 4.79419  | 1.17869 | 0.1788  | 0.50026  | 0.02026 | 97.2165  | 2.48807  | 2.16453 | 0.32862 | 0.02854 | 0.0019  | 4.23332  | 3.78711  | 1.03  | 0.92 | 89.32    |
| 27 | 0.2889 | 5.24964  | 0.04188  | 0.12965 | 0.03111 | 0.00571  | 0.00254 | 32.13577 | 14.4054  | 0.23791 | 0.05709 | 0.00307 | 0.0004  | 3.5428   | 0.75264  | 0.86  | 0.18 | 20.93    |
| 28 | 0.2969 | 33.11268 | 2.45842  | 2.14705 | 0.34483 | 0.10466  | 0.0142  | 92.94497 | 10.62652 | 3.94552 | 0.63463 | 0.03023 | 0.00655 | 2.33756  | 3.52565  | 0.57  | 0.86 | 150.88   |
| 29 | 0.3107 | 164.334  | 2.3086   | 0.28425 | 0.07443 | 0.54414  | 0.01057 | 97.84802 | 1.33859  | 0.52166 | 0.13662 | 0.01956 | 0.00138 | 3.5365   | 2.20132  | 0.86  | 0.53 | 61.63    |
| 30 | 0.3159 | 42.93086 | 1.58323  | 1.6799  | 0.20484 | 0.1252   | 0.01681 | 85.91497 | 11.14374 | 3.08605 | 0.37675 | 0.03782 | 0.00312 | 6.04982  | 4.79247  | 1.47  | 1.16 | 78.91    |
| 31 | 0.3186 | 33.84981 | 1.67188  | 3.14264 | 0.33498 | 0.10361  | 0.01061 | 89.76047 | 15.14158 | 5.77913 | 0.61738 | 0.04343 | 0.00522 | 3.47073  | 5.13655  | 0.84  | 1.25 | 148.81   |
| 32 | 0.3284 | 28.84539 | 0.36572  | 1.24945 | 0.06775 | 0.09049  | 0.00637 | 92.43443 | 6.44047  | 2.29458 | 0.12453 | 0.0303  | 0.00175 | 2.182    | 1.858    | 0.53  | 0.45 | 84.91    |
| 33 | 0.3323 | 21.86908 | 0.7187   | 3.95801 | 0.22532 | 0.05038  | 0.01629 | 66.6673  | 21.93338 | 7.28275 | 0.41575 | 0.01239 | 0.0025  | 7.30009  | 4.81084  | 1.77  | 1.17 | 66.10    |
| 34 | 0.3439 | 125.2117 | 1.33778  | 2.14356 | 0.0828  | 0.41679  | 0.00921 | 98.24378 | 1.93375  | 3.9391  | 0.15239 | 0.01205 | 0.00114 | 2.2018   | 2.42516  | 0.53  | 0.59 | 111.32   |
| 35 | 0.3543 | 2.21967  | 0.08492  | 1.68609 | 0.06053 | -0.00102 | 0.00486 | -20.0566 | 65.54322 | 3.09744 | 0.11134 | 0.00463 | 0.00135 | 2.63238  | 1.43966  | 0.64  | 0.35 | 54.69    |
| 36 | 0.3595 | 87.63284 | 1.54253  | 1.62083 | 0.10673 | 0.27444  | 0.01389 | 92.42053 | 4.41041  | 2.9774  | 0.19628 | 0.04122 | 0.00272 | 6.64747  | 3.87107  | 1.61  | 0.94 | 58.39    |
| 37 | 0.3752 | 2.06068  | 0.04618  | 0.09757 | 0.02891 | 0.0007   | 0.00296 | 9.81605  | 43.07898 | 0.17904 | 0.05305 | 0.00202 | 0.00067 | 1.83175  | 0.87617  | 0.44  | 0.21 | 47.73    |
| 38 | 0.3852 | 410.7025 | 5.16823  | 2.56318 | 0.07331 | 1.428    | 0.0231  | 102.7002 | 1.07777  | 4.71162 | 0.13499 | 0.04195 | 0.00214 | -11.1091 | 4.43283  | -2.7  | 1.08 | -40.00   |
| 39 | 0.3905 | 12.67636 | 0.30208  | 1.66231 | 0.12006 | 0.03714  | 0.00983 | 85.70501 | 22.92954 | 3.05369 | 0.22081 | 0.021   | 0.00295 | 1.80997  | 2.90451  | 0.44  | 0.7  | 159.09   |
| 40 | 0.3961 | 252.7366 | 5.15286  | 1.77176 | 0.15519 | 0.87144  | 0.0194  | 101.8435 | 0.95542  | 3.255   | 0.28546 | 0.01513 | 0.00297 | -4.66457 | 2.41728  | -1.13 | 0.59 | -52.21   |
| 41 | 0.4041 | 21.99523 | 0.41376  | 1.69907 | 0.12037 | 0.07052  | 0.00642 | 94.23071 | 8.46727  | 3.1213  | 0.22139 | 0.0291  | 0.0019  | 1.26878  | 1.86249  | 0.31  | 0.45 | 145.16   |
| 42 | 0.4131 | 10.32863 | 0.23478  | 0.44939 | 0.09778 | 0.01343  | 0.00481 | 38.18109 | 13.78388 | 0.82482 | 0.17952 | 0.01741 | 0.00237 | 6.36872  | 1.4286   | 1.55  | 0.35 | 22.58    |
| 43 | 0.4182 | 203.249  | 6.35968  | 1.81332 | 0.19244 | 0.67369  | 0.02504 | 97.88735 | 1.99964  | 3.33147 | 0.354   | 0.00852 | 0.00277 | 4.29882  | 4.07259  | 1.04  | 0.99 | 95.19    |
| 44 | 0.4218 | 46.1856  | 2.26045  | 2.22963 | 0.25154 | 0.15397  | 0.0175  | 98.17919 | 10.13007 | 4.09753 | 0.46299 | 0.03865 | 0.00408 | 0.84174  | 4.68337  | 0.2   | 1.14 | 570.00   |
| 45 | 0.4306 | 287.3095 | 7.24767  | 1.55932 | 0.1221  | 1.00209  | 0.02635 | 103.0317 | 0.87642  | 2.8643  | 0.22452 | 0.0216  | 0.00197 | -8.71914 | 2.5213   | -2.12 | 0.61 | -28.77   |
| 46 | 0.4362 | 186.7955 | 5.41732  | 1.40633 | 0.18097 | 0.61627  | 0.02146 | 97.44423 | 1.89518  | 2.583   | 0.33271 | 0.01679 | 0.00244 | 4.77805  | 3.54666  | 1.16  | 0.86 | 74.14    |
| 47 | 0.4491 | 10.52018 | 0.12973  | 0.49293 | 0.07066 | 0.02459  | 0.00358 | 68.89093 | 10.0721  | 0.90478 | 0.12974 | 0.02092 | 0.0011  | 3.26463  | 1.0584   | 0.79  | 0.26 | 32.91    |
| 48 | 0.4552 | 8.44597  | 0.23152  | 1.69632 | 0.18154 | 0.02155  | 0.00866 | 73.98569 | 30.36271 | 3.11625 | 0.33389 | 0.01379 | 0.0021  | 2.19207  | 2.56026  | 0.53  | 0.62 | 116.98   |
| 49 | 0.4632 | 439.9772 | 10.40754 | 2.08875 | 0.13242 | 1.50068  | 0.03656 | 100.757  | 0.67659  | 3.83822 | 0.2437  | 0.04371 | 0.00245 | -3.33515 | 2.97935  | -0.81 | 0.72 | -88.89   |
| 50 | 0.468  | 187.8953 | 6.07206  | 2.19867 | 0.18948 | 0.63923  | 0.02367 | 100.4495 | 1.84257  | 4.04053 | 0.34876 | 0.0416  | 0.00305 | -0.84572 | 3.46686  | -0.21 | 0.84 | -400.00  |
| 51 | 0.4774 | 1.9747   | 0.08766  | 0.53236 | 0.05325 | -0.00187 | 0.00548 | -30.6737 | 83.29251 | 0.97717 | 0.09777 | 0.03608 | 0.00196 | 2.54257  | 1.62324  | 0.62  | 0.39 | 62.90    |
| 52 | 0.4856 | 102.1662 | 2.37469  | 1.89068 | 0.1033  | 0.32796  | 0.01326 | 94.73187 | 3.15159  | 3.47377 | 0.19006 | 0.01808 | 0.00197 | 5.38788  | 3.22643  | 1.31  | 0.78 | 59.54    |
| 53 | 0.4871 | 363.7324 | 51.73813 | 3.45778 | 0.67208 | 1.2118   | 0.18182 | 98.37767 | 4.71467  | 6.36009 | 1.23922 | 0.00239 | 0.01078 | 5.91489  | 17.21108 | 1.44  | 4.17 | 289.58   |
| 54 | 0.4936 | 81.46328 | 2.59736  | 0.73676 | 0.11552 | 0.2761   | 0.01235 | 100.1157 | 3.15835  | 1.35255 | 0.21218 | 0.00058 | 0.00223 | -0.09427 | 2.5733   | -0.02 | 0.62 | -3100.00 |
| 55 | 0.5057 | 105.3467 | 1.80111  | 0.47894 | 0.05902 | 0.33745  | 0.00942 | 94.64356 | 2.11024  | 0.87908 | 0.10837 | 0.02076 | 0.00136 | 5.64315  | 2.22646  | 1.37  | 0.54 | 39.42    |
| 56 | 0.5124 | 112.6121 | 3.80392  | 2.94055 | 0.13711 | 0.35981  | 0.01477 | 94.22589 | 2.20988  | 5.40674 | 0.25263 | 0.00176 | 0.00238 | 6.51416  | 2.50339  | 1.58  | 0.61 | 38.61    |
| 57 | 0.5191 | 72.75628 | 2.03867  | 2.53906 | 0.11231 | 0.2451   | 0.01074 | 99.30143 | 3.3689   | 4.66719 | 0.20682 | 0.12971 | 0.00439 | 0.50896  | 2.45463  | 0.12  | 0.6  | 500.00   |
| 58 | 0.5338 | 150.0803 | 2.15496  | 0.24783 | 0.04458 | 0.51293  | 0.0104  | 100.9988 | 1.47367  | 0.45482 | 0.08182 | 0.01359 | 0.00114 | -1.49894 | 2.21132  | -0.36 | 0.54 | -150.00  |
| 59 | 0.539  | 23.41441 | 0.88122  | 0.65145 | 0.12512 | 0.0766   | 0.01229 | 96.56243 | 15.11543 | 1.19586 | 0.22979 | 0.03716 | 0.00351 | 0.80424  | 3.53665  | 0.2   | 0.86 | 430.00   |
| 60 | 0.5699 | 10.24535 | 0.08332  | 0.23569 | 0.02964 | 0.02347  | 0.00212 | 67.69017 | 6.11974  | 0.43253 | 0.0544  | 0.00085 | 0.00045 | 3.30121  | 0.62604  | 0.8   | 0.15 | 18.75    |
| 61 | 0.5816 | 25.04953 | 0.38169  | 1.45938 | 0.08447 | 0.08385  | 0.00606 | 98.55687 | 7.00503  | 2.68053 | 0.1553  | 0.03845 | 0.00152 | 0.36144  | 1.75451  | 0.09  | 0.43 | 477.78   |
| 62 | 0.5999 | 33.73128 | 0.28279  | 1.4465  | 0.04727 | 0.11577  | 0.00494 | 101.156  | 4.24787  | 2.65684 | 0.08691 | 0.00239 | 0.00071 | -0.38997 | 1.43306  | -0.09 | 0.35 | -388.89  |
| 63 | 0.6103 | 17.60046 | 0.35963  | 1.92557 | 0.09515 | 0.06707  | 0.00342 | 111.8897 | 5.29628  | 3.53796 | 0.17505 | 0.0146  | 0.00118 | -2.09196 | 0.93222  | -0.51 | 0.23 | -45.10   |
| 64 | 0.6151 | 60.48734 | 1.57495  | 1.2419  | 0.10978 | 0.19868  | 0.01184 | 96.93787 | 5.22496  | 2.28071 | 0.20179 | 0.03308 | 0.00376 | 1.85292  | 3.16241  | 0.45  | 0.77 | 171.11   |
| 65 | 0.6275 | 8.9046   | 0.10627  | 0.41193 | 0.04669 | 0.02212  | 0.00411 | 73.27189 | 13.68017 | 0.75605 | 0.08572 | 0.01826 | 0.00126 | 2.37278  | 1.21511  | 0.58  | 0.29 | 50.00    |
| 66 | 0.6311 | 166.6596 | 5.73495  | 3.08594 | 0.20755 | 0.56972  | 0.03067 | 100.8814 | 4.19957  | 5.67464 | 0.38249 | 0.03528 | 0.00454 | -1.47186 | 7.013    | -0.36 | 1.7  | -472.22  |
| 67 | 0.6364 | 28.38524 | 0.82288  | 1.29652 | 0.12927 | 0.08488  | 0.01375 | 88.07535 | 14.11319 | 3.28111 | 0.23762 | 0.03038 | 0.00372 | 3.3844   | 4.00734  | 0.82  | 0.97 | 118.29   |
| 68 | 0.6396 | 39.19458 | 1.45385  | 2.42906 | 0.29221 | 0.13318  | 0.01884 | 99.9738  | 13.72691 | 4.46446 | 0.53801 | 0.02091 | 0.00506 | 0.01028  | 5.38542  | 0     | 1.31 |          |
| 69 | 0.6465 | 74.7623  | 1.2699   | 2.11127 | 0.11117 | 0.25957  | 0.01054 | 102.4021 | 3.79766  | 3.87968 | 0.20459 | 0.04902 | 0.00249 | -1.79784 | 2.84228  | -0.44 | 0.69 | -156.82  |
| 70 | 0.6572 | 1.73416  | 0.09726  | 0.21002 | 0.06579 | 0.01748  | 0.00606 | 72.44224 | 25.20457 | 0.38541 | 0.12076 | 0.00431 | 0.00136 | 1.95812  | 1.79147  | 0.48  | 0.43 | 89.58    |
| 71 | 0.661  | 643.0716 | 19.02195 | 0.92905 | 0.22964 | 2.12539  | 0.07119 | 97.65707 | 1.56481  | 1       |         |         |         |          |          |       |      |          |

|     |        |          |         |         |         |          |         |          |          |         |         |         |         |          |         |      |      |        |
|-----|--------|----------|---------|---------|---------|----------|---------|----------|----------|---------|---------|---------|---------|----------|---------|------|------|--------|
| 107 | 0.9291 | 5.40747  | 0.08479 | 0.0409  | 0.04082 | 0.0065   | 0.00291 | 35.67354 | 15.96324 | 0.07505 | 0.0749  | 0.00189 | 0.00116 | 3.45943  | 0.86069 | 0.84 | 0.21 | 25.00  |
| 108 | 0.9341 | 201.979  | 5.9289  | 1.40779 | 0.20308 | 0.67535  | 0.02284 | 98.76263 | 1.68522  | 2.58568 | 0.37336 | 0.02203 | 0.00289 | 2.50135  | 3.40819 | 0.61 | 0.83 | 136.07 |
| 109 | 0.9405 | 6.82668  | 0.17181 | 1.12917 | 0.09793 | 0.00369  | 0.00508 | 14.68063 | 22.0911  | 2.07352 | 0.17998 | 0.00369 | 0.00176 | 5.80379  | 1.51037 | 1.41 | 0.37 | 26.24  |
| 110 | 0.9437 | 52.0321  | 2.17682 | 1.30251 | 0.26931 | 0.17378  | 0.01766 | 98.54385 | 9.16257  | 2.39212 | 0.49507 | 0.03629 | 0.00456 | 0.75793  | 4.76942 | 0.18 | 1.16 | 644.44 |
| 111 | 0.9488 | 154.2975 | 3.92393 | 1.37774 | 0.16924 | 0.50937  | 0.01686 | 97.49542 | 2.07482  | 2.53042 | 0.31113 | 0.00881 | 0.00236 | 3.86752  | 3.2058  | 0.94 | 0.78 | 82.98  |
| 112 | 0.9542 | 39.80772 | 1.04575 | 1.72822 | 0.14156 | 0.12766  | 0.01017 | 94.47473 | 7.14431  | 3.17491 | 0.26038 | 0.03968 | 0.00288 | 2.20053  | 2.84627 | 0.53 | 0.69 | 130.19 |
| 113 | 0.957  | 95.67645 | 3.47815 | 1.43141 | 0.38998 | 0.32002  | 0.02717 | 98.7462  | 7.95382  | 2.62911 | 0.717   | 0.03031 | 0.00564 | 1.20043  | 7.27091 | 0.29 | 1.76 | 606.90 |
| 114 | 0.9595 | -1.3361  | 0.21982 | 1.67909 | 0.30912 | -0.02195 | 0.02223 | 484.9838 | 486.3305 | 3.08456 | 0.56855 | 0.05204 | 0.00551 | 5.2642   | 6.57883 | 1.28 | 1.6  | 125.00 |
| 115 | 0.9629 | 25.83076 | 1.13197 | 1.57125 | 0.19467 | 0.06123  | 0.01251 | 69.62229 | 14.01354 | 2.88624 | 0.35799 | 0.02564 | 0.00254 | 7.84649  | 3.67789 | 1.9  | 0.88 | 46.32  |
| 116 | 0.9701 | 11.14412 | 0.29096 | 1.30804 | 0.10329 | 0.0271   | 0.00801 | 71.08983 | 21.21598 | 2.40229 | 0.18987 | 0.0012  | 0.00232 | 3.21618  | 2.36244 | 0.78 | 0.57 | 73.08  |
| 117 | 0.9866 | 3.41948  | 0.05059 | 0.06615 | 0.04131 | -0.00123 | 0.00314 | -10.8517 | 27.34484 | 0.12139 | 0.07581 | 0.00098 | 0.00083 | 3.75781  | 0.92853 | 0.91 | 0.23 | 25.27  |
| 118 | 0.9912 | 246.3503 | 8.69677 | 1.09858 | 0.18318 | 0.79952  | 0.03283 | 95.87865 | 2.02641  | 2.01731 | 0.33663 | 0.02133 | 0.0023  | 10.15961 | 5.00994 | 2.46 | 1.21 | 49.19  |
| 119 | 0.9946 | 7.6539   | 0.36502 | 2.11825 | 0.22206 | 0.00054  | 0.01141 | -0.19512 | 44.23918 | 3.89252 | 0.40867 | 0.04515 | 0.00363 | 7.65057  | 3.39784 | 1.86 | 0.82 | 44.09  |
| 120 | 0.9971 | 12.15833 | 0.72803 | 2.13045 | 0.34687 | -0.00566 | 0.01482 | -15.2279 | 36.10672 | 3.91496 | 0.63838 | 0.01489 | 0.00731 | 13.99667 | 4.46215 | 3.39 | 1.08 | 31.86  |
| 121 | 1      | 15.78384 | 0.80127 | 1.20072 | 0.29548 | 0.02958  | 0.01593 | 54.8541  | 29.74964 | 2.20503 | 0.54309 | 0.01684 | 0.00474 | 7.1184   | 4.70625 | 1.73 | 1.14 | 65.90  |

Integrated 72.87173 0.19426 1.11287 0.01177 0.23817 0.00103 96.49204 0.33058 2.04357 0.02163 0.01806 0.00022 2.55728 0.24118 0.62 0.06 9.68

# COPPER RIVER

Weighted average of J from standards = 1.347e-04 2.749e-06

| Grain # | Cumulative 40Ar/39Ar<br>39Ar |          | 37Ar/39Ar<br>meas. |          | 36Ar/39Ar<br>meas. |          | % Atm.<br>40Ar | Ca/K     | Cl/K     | 40*/39K  |         | Age<br>(Ma) | %error  |          |          |       |      |         |
|---------|------------------------------|----------|--------------------|----------|--------------------|----------|----------------|----------|----------|----------|---------|-------------|---------|----------|----------|-------|------|---------|
| 1       | 0.0059                       | 103.3567 | 2.54175            | 0.32573  | 0.25628            | 0.34519  | 0.01768        | 98.69256 | 4.44582  | 0.59781  | 0.47045 | 0.02728     | 0.00416 | 1.35125  | 4.59512  | 0.33  | 1.12 | 339.39  |
| 2       | 0.0099                       | 28.7127  | 1.27107            | 1.78412  | 0.39511            | 0.07614  | 0.02828        | 77.93331 | 28.93528 | 3.27774  | 0.7268  | 0.03692     | 0.00425 | 6.33738  | 8.31553  | 1.54  | 2.02 | 131.17  |
| 3       | 0.0186                       | 12.00211 | 0.24411            | 0.5051   | 0.1819             | 0.02636  | 0.00877        | 64.70802 | 21.6216  | 0.92713  | 0.33399 | 0.00637     | 0.00188 | 4.22681  | 2.59184  | 1.03  | 0.63 | 61.17   |
| 4       | 0.0219                       | 9.56318  | 0.61984            | 0.23342  | 0.60153            | 0.03946  | 0.02653        | 122.1145 | 82.03058 | 0.42837  | 1.10409 | 0.02344     | 0.00561 | -2.10863 | 7.81986  | -0.51 | 1.9  | -372.55 |
| 5       | 0.029                        | 87.60679 | 2.29391            | 1.12662  | 0.23462            | 0.28706  | 0.01491        | 96.7518  | 4.35408  | 2.06884  | 0.43119 | 0.01122     | 0.00232 | 2.84695  | 3.81723  | 0.69  | 0.93 | 134.78  |
| 6       | 0.0373                       | 53.75545 | 1.31635            | 0.87539  | 0.18509            | 0.19669  | 0.01045        | 108.0487 | 5.1265   | 1.60721  | 0.34003 | 0.02471     | 0.00312 | -4.3269  | 2.75687  | -1.05 | 0.67 | -63.81  |
| 7       | 0.0441                       | 13.12991 | 0.46432            | 0.38568  | 0.21986            | 0.03383  | 0.01051        | 76.07262 | 23.62169 | 0.70786  | 0.40363 | 0.01588     | 0.00224 | 3.13539  | 3.09985  | 0.76  | 0.75 | 98.68   |
| 8       | 0.0593                       | 58.47374 | 1.12629            | 0.65952  | 0.10688            | 0.20034  | 0.00866        | 101.2034 | 3.92877  | 1.2107   | 0.1963  | 0.0263      | 0.00148 | -0.70364 | 2.29721  | -0.17 | 0.56 | -329.41 |
| 9       | 0.0606                       | 892.1233 | 129.61193          | 1.4686   | 1.2078             | 2.93542  | 0.43541        | 97.22033 | 2.91164  | 2.69748  | 2.22075 | 0.07522     | 0.01705 | 24.823   | 26.253   | 6.02  | 6.35 | 105.48  |
| 10      | 0.072                        | 59.63358 | 0.88277            | 0.48854  | 0.13352            | 0.19751  | 0.01039        | 97.85051 | 4.95499  | 0.89671  | 0.24516 | 0.0326      | 0.00187 | 1.28162  | 2.95463  | 0.31  | 0.72 | 232.26  |
| 11      | 0.0738                       | 49.58366 | 5.00671            | -0.36753 | 0.64858            | 0.12379  | 0.04643        | 73.87792 | 26.70305 | -0.67418 | 1.18944 | 0.03596     | 0.01178 | 12.94116 | 13.30048 | 3.14  | 3.22 | 102.55  |
| 12      | 0.079                        | 66.91206 | 3.33049            | 0.96574  | 0.2301             | 0.21192  | 0.01984        | 93.51341 | 7.44006  | 1.7732   | 0.42278 | 0.03748     | 0.00397 | 4.34135  | 4.98508  | 1.05  | 1.21 | 115.24  |
| 13      | 0.0907                       | 20.01497 | 0.33954            | 0.65832  | 0.10652            | 0.06084  | 0.00767        | 89.68316 | 11.26516 | 1.20848  | 0.19563 | 0.01188     | 0.00148 | 2.06281  | 2.2532   | 0.5   | 0.55 | 110.00  |
| 14      | 0.0986                       | 11.14111 | 0.40565            | 0.40216  | 0.15432            | 0.03624  | 0.01079        | 96.08801 | 28.52593 | 0.73812  | 0.28332 | 0.03298     | 0.00359 | 0.4348   | 3.17085  | 0.11  | 0.77 | 700.00  |
| 15      | 0.1056                       | 34.70293 | 0.98849            | 0.93331  | 0.16491            | 0.08339  | 0.01182        | 70.85004 | 9.8832   | 1.71362  | 0.30299 | 0.0247      | 0.00335 | 10.1139  | 3.44318  | 2.45  | 0.83 | 33.88   |
| 16      | 0.1142                       | 97.56185 | 2.65018            | 0.52075  | 0.13795            | 0.33009  | 0.01526        | 99.96487 | 3.75994  | 0.95586  | 0.2533  | 0.04037     | 0.00273 | 0.03428  | 3.66853  | 0.01  | 0.89 | 8900.00 |
| 17      | 0.1291                       | 19.46455 | 0.32686            | 0.26435  | 0.07591            | 0.05884  | 0.00793        | 89.35928 | 11.97382 | 0.48513  | 0.13933 | 0.03568     | 0.00172 | 2.06839  | 2.32817  | 0.5   | 0.56 | 112.00  |
| 18      | 0.1388                       | 11.23354 | 0.33438            | 0.58749  | 0.11951            | 0.03566  | 0.00947        | 93.61173 | 24.87962 | 1.07841  | 0.21947 | 0.03654     | 0.00194 | 0.71603  | 2.78911  | 0.17  | 0.68 | 400.00  |
| 19      | 0.1443                       | 3.78878  | 0.25715            | 0.95909  | 0.21788            | 0.00596  | 0.01363        | 44.71302 | 107.1596 | 1.76099  | 0.40032 | 0.0337      | 0.00466 | 2.0797   | 4.03643  | 0.5   | 0.98 | 196.00  |
| 20      | 0.1498                       | 50.46423 | 1.76076            | 0.55117  | 0.31351            | 0.1745   | 0.01798        | 102.1502 | 9.93858  | 1.01172  | 0.5757  | 0.03084     | 0.00384 | -1.08484 | 5.01435  | -0.26 | 1.22 | -469.23 |
| 21      | 0.1724                       | 1.53923  | 0.04205            | 0.50532  | 0.0526             | 0.00672  | 0.00574        | 128.7756 | 112.3211 | 0.92752  | 0.09658 | 0.01545     | 0.00101 | -0.43453 | 1.69584  | -0.11 | 0.41 | -372.73 |
| 22      | 0.1814                       | 115.0911 | 2.9419             | 1.38995  | 0.11579            | 0.35535  | 0.01814        | 91.16179 | 4.04264  | 2.55288  | 0.21289 | 0.02739     | 0.0034  | 10.17936 | 4.66442  | 2.47  | 1.13 | 45.75   |
| 23      | 0.1876                       | 18.42211 | 0.83514            | 1.35712  | 0.18309            | 0.05748  | 0.02128        | 91.73626 | 33.94604 | 2.49251  | 0.33659 | 0.03478     | 0.00402 | 1.52136  | 6.25016  | 0.37  | 1.52 | 410.81  |
| 24      | 0.1928                       | 30.18638 | 1.09062            | 1.41257  | 0.19281            | 0.08571  | 0.02664        | 83.60025 | 25.93177 | 2.59447  | 0.35449 | 0.01854     | 0.00451 | 4.95056  | 7.83046  | 1.2   | 1.9  | 158.33  |
| 25      | 0.1979                       | 7.40759  | 0.35533            | 0.94611  | 0.27598            | 0.05356  | 0.02322        | 213.4775 | 92.82326 | 1.73715  | 0.50706 | 0.02988     | 0.00503 | -8.37786 | 6.8493   | -2.03 | 1.66 | -81.77  |
| 26      | 0.2029                       | 9.25911  | 0.44224            | 1.07538  | 0.30076            | 0.06268  | 0.03514        | 199.7369 | 112.1879 | 1.97467  | 0.55269 | 0.0198      | 0.00631 | -9.21215 | 10.36757 | -2.24 | 2.52 | -112.50 |
| 27      | 0.2091                       | 90.65142 | 3.46476            | 1.51579  | 0.2766             | 0.28025  | 0.0273         | 91.2459  | 8.198    | 2.78425  | 0.50861 | 0.0042      | 0.00448 | 7.94162  | 7.44429  | 1.93  | 1.81 | 93.78   |
| 28      | 0.2154                       | 13.49455 | 0.51493            | 1.31701  | 0.19519            | 0.03832  | 0.02311        | 83.29766 | 50.63016 | 2.41879  | 0.35882 | 0.02516     | 0.00367 | 2.25104  | 6.8247   | 0.55  | 1.66 | 301.82  |
| 29      | 0.2334                       | 178.4317 | 2.21798            | 0.28271  | 0.07051            | 0.61224  | 0.01392        | 101.3974 | 1.95442  | 0.51884  | 0.12942 | 0.02267     | 0.00157 | -2.49344 | 3.48699  | -0.61 | 0.85 | -139.34 |
| 30      | 0.2437                       | 7.94275  | 0.23807            | 1.17793  | 0.12911            | 0.0148   | 0.01235        | 54.02593 | 46.08741 | 2.16314  | 0.23729 | 0.01747     | 0.00269 | 3.64099  | 3.65222  | 0.88  | 0.89 | 101.14  |
| 31      | 0.2487                       | 68.60022 | 2.98748            | 1.06307  | 0.39086            | 0.25456  | 0.02071        | 109.5745 | 7.54522  | 1.95206  | 0.71826 | 0.02637     | 0.00381 | -6.57019 | 5.18528  | -1.6  | 1.26 | -78.75  |
| 32      | 0.2518                       | -2.43863 | 0.44724            | 1.14825  | 0.71509            | -0.01947 | 0.03245        | 236.929  | 390.0171 | 2.10859  | 1.31422 | 0.02699     | 0.00702 | 3.38257  | 9.59865  | 0.82  | 2.33 | 284.15  |
| 33      | 0.2605                       | 22.21263 | 0.63928            | 0.68506  | 0.27303            | 0.04912  | 0.0173         | 65.18282 | 22.98034 | 1.25759  | 0.50146 | 0.02415     | 0.00286 | 7.72721  | 5.10585  | 1.87  | 1.24 | 66.31   |
| 34      | 0.27                         | 230.0952 | 6.90638            | 0.49772  | 0.17788            | 0.78685  | 0.02742        | 101.047  | 1.83654  | 0.91356  | 0.32661 | 0.02085     | 0.00273 | -2.40962 | 4.22625  | -0.59 | 1.03 | -174.58 |
| 35      | 0.2736                       | 87.64424 | 6.69962            | 1.09102  | 0.48804            | 0.32418  | 0.04771        | 109.2347 | 13.77407 | 2.00342  | 0.89686 | 0.03464     | 0.00709 | -8.09177 | 12.09152 | -1.97 | 2.94 | -149.24 |
| 36      | 0.2794                       | 131.7483 | 6.25512            | 1.1324   | 0.30006            | 0.41951  | 0.02672        | 94.04333 | 3.99854  | 2.07947  | 0.55144 | 0.03412     | 0.00542 | 8.75233  | 5.28468  | 1.91  | 1.28 | 67.02   |
| 37      | 0.2828                       | 282.7526 | 19.67908           | 2.04713  | 0.53211            | 0.92711  | 0.07981        | 96.84104 | 4.91564  | 3.76163  | 0.97917 | 0.03953     | 0.00738 | 8.94405  | 13.93241 | 2.17  | 3.38 | 155.76  |
| 38      | 0.2911                       | 97.78022 | 2.9496             | 1.36508  | 0.22995            | 0.32603  | 0.01848        | 98.44312 | 4.73641  | 2.50715  | 0.42274 | 0.01997     | 0.0029  | 1.52333  | 4.63474  | 0.37  | 1.12 | 302.70  |
| 39      | 0.2964                       | 1.27551  | 0.22625            | 0.85741  | 0.32556            | 0.02735  | 0.0183         | 642.9983 | 447.7951 | 1.57417  | 0.59809 | 0.03634     | 0.00414 | -6.76891 | 5.41305  | -1.64 | 1.32 | -80.49  |
| 40      | 0.3052                       | 120.4463 | 2.78494            | 0.62086  | 0.19831            | 0.42186  | 0.02047        | 103.481  | 4.43859  | 1.13969  | 0.36419 | 0.03194     | 0.00269 | -4.19352 | 5.34716  | -1.02 | 1.3  | -127.45 |
| 41      | 0.3147                       | 0.11326  | 0.1039             | 0.49025  | 0.15255            | -0.01281 | 0.01049        | -45.79   | 29.6723  | 0.89985  | 0.2801  | 0.02491     | 0.00224 | 3.91174  | 3.10216  | 0.95  | 0.75 | 78.95   |
| 42      | 0.3214                       | 3.6568   | 0.22354            | 0.69146  | 0.2264             | 0.01521  | 0.01577        | 122.3414 | 128.5374 | 1.26935  | 0.41583 | 0.03473     | 0.0033  | -0.81074 | 4.6628   | -0.2  | 1.13 | -565.00 |
| 43      | 0.3262                       | 8.62249  | 0.41684            | 0.75846  | 0.32449            | 0.00617  | 0.0205         | 20.50477 | 70.48888 | 1.39241  | 0.59604 | 0.03744     | 0.00494 | 6.83453  | 6.07015  | 1.66  | 1.47 | 88.55   |
| 44      | 0.3368                       | 13.69549 | 0.31944            | 1.22747  | 0.14813            | 0.0186   | 0.00851        | 39.47383 | 18.38256 | 2.25419  | 0.27228 | 0.02726     | 0.00214 | 8.27857  | 5.22268  | 2.01  | 0.61 | 30.35   |
| 45      | 0.3458                       | 7.78448  | 0.25468            | 0.8298   | 0.1481             | 0.00629  | 0.00886        | 23.07058 | 33.74814 | 1.52346  | 0.27207 | 0.03278     | 0.00224 | 5.96922  | 2.62679  | 1.45  | 0.64 | 44.14   |
| 46      | 0.3516                       | 8.49747  | 0.34734            | 1.04682  | 0.273              | 0.0105   | 0.01744        | 35.62267 | 60.85317 | 1.92219  | 0.50166 | 0.01483     | 0.00319 | 5.45537  | 5.16259  | 1.32  | 1.25 | 94.70   |
| 47      | 0.3695                       | 24.71157 | 0.35689            | 0.69387  | 0.0801             | 0.08947  | 0.00517        | 106.8841 | 6.02683  | 1.27379  | 1.4712  | 0.01651     | 0.00127 | -1.69996 | 1.48799  | -0.41 | 0.36 | -87.80  |
| 48      | 0.3763                       | 27.1525  | 1.04134            | 2.547    | 0.28727            | 0.06693  | 0.01348        | 72.14138 | 14.44081 | 4.68182  | 0.52901 | 0.05515     | 0.00407 | 7.56967  | 3.93667  | 1.84  | 0.95 | 51.63   |
| 49      | 0.3798                       | 59.00021 | 4.11516            | 2.62767  | 0.45217            | 0.15423  | 0.0362         | 76.91853 | 17.32855 | 4.83038  | 0.83275 | 0.02515     | 0.00659 | 13.63658 | 10.28343 | 3.31  | 2.49 | 70.23   |
| 50      | 0.3883                       | 57.82157 | 1.59059            | 0.44027  | 0.15251            | 0.16868  | 0.01187        | 86.18722 | 5.60855  | 0.80809  | 0.28002 | 0.03123     | 0.00259 | 7.98515  | 3.25165  | 1.94  | 0.79 | 47.72   |
| 51      | 0.3972                       | 14.79422 | 0.38321            | 0.82299  | 0.19204            | 0.04628  | 0.01352        | 92.1015  | 26.97661 | 1.52365  | 0.35279 | 0.02403     | 0.00295 | 1.15672  | 3.98604  | 0.28  | 0.97 | 346.43  |
| 52      | 0.3996                       | 124.5583 | 13.3639            | 3.44471  | 0.84255            | 0.33947  | 0.07204        | 80.37866 | 14.75984 | 6.52038  | 1.55373 | 0.05047     | 0.01196 | 24.57042 | 18.61895 | 5.95  | 4.5  | 75.63   |
| 53      | 0.4163                       | 32.98158 | 0.56367            | 0.52165  | 0.1237             | 0.05165  | 0.00807        | 46.18293 | 7.19484  | 0.9575   | 0.22714 | 0.00293     | 0.00162 | 17.74028 | 2.39252  | 4.3   | 0.58 | 13.49   |
| 54      | 0.4262                       | 17.95396 | 0.52888            | 0.9545   | 0.16181            | 0.03777  | 0.01044        | 61.83515 | 17.12343 | 1.75256  | 0.2973  | 0.03013     | 0.00281 | 6.84539  | 3.07925  | 1.66  | 0.75 | 45.18   |
| 55      | 0.4344                       | 17.89497 | 0.60277            | 0.90317  | 0.25966            | 0.04105  | 0.016          | 67.45757 | 26.8636  | 1.65825  | 0.47705 | 0.04314     | 0.0036  | 5.81429  | 4.72233  | 1.41  | 1.15 | 81.56   |
| 56      | 0.4432                       | 33.03139 | 0.95777            | 1.59592  | 0.22956            | 0.08847  | 0.01564        | 78.8224  | 13.82711 | 2.9316   | 0.42217 | 0.0168      | 0.00285 | 6.99686  | 4.57401  |       |      |         |

|     |        |          |          |         |         |          |         |          |          |         |         |          |         |          |          |        |       |          |
|-----|--------|----------|----------|---------|---------|----------|---------|----------|----------|---------|---------|----------|---------|----------|----------|--------|-------|----------|
| 69  | 0.5436 | 4.60329  | 0.18405  | 0.51105 | 0.14235 | 0.01784  | 0.00884 | 114.3501 | 57.1378  | 0.93804 | 0.26139 | 0.00918  | 0.00197 | -0.65655 | 2.61317  | -0.16  | 0.63  | -393.75  |
| 70  | 0.5473 | 133.3618 | 10.359   | 0.80861 | 0.4032  | 0.43303  | 0.04189 | 95.9206  | 5.54528  | 1.48454 | 0.74066 | 0.04345  | 0.00798 | 5.44226  | 7.41077  | 1.32   | 1.8   | 136.36   |
| 71  | 0.5674 | 15.11949 | 0.20129  | 0.152   | 0.09253 | 0.03926  | 0.00773 | 76.79992 | 15.11108 | 0.27892 | 0.16982 | 0.00152  | 0.00074 | 3.50122  | 2.28122  | 0.85   | 0.55  | 64.71    |
| 72  | 0.5744 | 51.80171 | 1.85126  | 0.36841 | 0.21767 | 0.17365  | 0.0187  | 99.05448 | 10.07605 | 0.67615 | 0.3996  | 0.01916  | 0.00304 | 0.48964  | 5.21803  | 0.12   | 1.27  | 1058.33  |
| 73  | 0.5785 | 45.08255 | 2.81353  | 1.89078 | 0.3524  | 0.114    | 0.03236 | 74.42653 | 20.71161 | 3.47396 | 0.64834 | 0.00581  | 0.00464 | 11.53699 | 9.37253  | 2.8    | 2.27  | 81.07    |
| 74  | 0.587  | 2.28876  | 0.12317  | 0.29418 | 0.17708 | 0.01492  | 0.01518 | 194.0249 | 198.6541 | 0.53989 | 0.32506 | 0.00182  | 0.00169 | -2.12452 | 4.48548  | -0.52  | 1.09  | -209.62  |
| 75  | 0.5901 | 3.55316  | 0.47561  | 0.12056 | 0.48747 | 0.00601  | 0.04362 | 50.15928 | 365.8638 | 0.22124 | 0.8946  | 0.02206  | 0.00687 | 1.75627  | 12.89658 | 0.43   | 3.13  | 727.91   |
| 76  | 0.5959 | 66.70062 | 2.77827  | 0.62922 | 0.36049 | 0.21735  | 0.02264 | 96.25676 | 9.21764  | 1.15505 | 0.66204 | 0.03144  | 0.00536 | 2.49676  | 6.14966  | 0.61   | 1.49  | 244.26   |
| 77  | 0.6039 | 8.19742  | 0.29279  | 0.1652  | 0.18868 | 0.01121  | 0.01398 | 39.38887 | 50.58054 | 2.13973 | 0.34677 | 0.01477  | 0.00257 | 4.95464  | 4.13959  | 1.2    | 1     | 83.33    |
| 78  | 0.6152 | 3.78604  | 0.11742  | 1.41571 | 0.12599 | 0.00737  | 0.01044 | 54.8644  | 82.14258 | 2.60022 | 0.23165 | 0.0069   | 0.00161 | 1.69716  | 3.08967  | 0.41   | 0.75  | 182.93   |
| 79  | 0.6189 | 5.8188   | 0.41621  | 0.14586 | 0.35308 | 0.00864  | 0.03128 | 43.87167 | 159.6758 | 0.26766 | 0.64799 | 0.02791  | 0.00627 | 3.24966  | 9.24905  | 0.79   | 2.24  | 283.54   |
| 80  | 0.6277 | 481.2075 | 14.39385 | 0.1899  | 0.14144 | 1.60748  | 0.05229 | 98.7151  | 1.28927  | 0.34849 | 0.2596  | 0.02921  | 0.00433 | 6.18348  | 6.20904  | 1.5    | 1.51  | 100.67   |
| 81  | 0.6333 | 4.79621  | 0.35517  | 0.71853 | 0.3707  | -0.00716 | 0.02268 | -45.6432 | 140.583  | 1.31907 | 0.68088 | 0.03634  | 0.00736 | 6.94564  | 6.71812  | 1.69   | 1.63  | 96.45    |
| 82  | 0.6395 | 207.9935 | 10.66467 | 2.5569  | 0.33609 | 0.67386  | 0.04409 | 95.64947 | 3.89927  | 4.70004 | 0.61891 | 0.02109  | 0.0066  | 9.0639   | 8.13794  | 2.2    | 1.97  | 89.55    |
| 83  | 0.6446 | 3.85054  | 0.38483  | 0.89207 | 0.43941 | -0.01887 | 0.02593 | -147.878 | 200.5272 | 1.63787 | 0.80727 | 0.03891  | 0.00821 | 9.47703  | 7.68972  | 2.3    | 1.86  | 80.87    |
| 84  | 0.6494 | 0.80826  | 0.58309  | 1.17028 | 0.40868 | 0.02138  | 0.02657 | 77.20013 | 97.35178 | 2.14908 | 0.75111 | 0.01894  | 0.00863 | 1.83887  | 7.85455  | 0.45   | 1.91  | 424.44   |
| 85  | 0.6531 | 179.4411 | 15.54715 | 0.43074 | 0.54448 | 0.61288  | 0.0631  | 100.9244 | 5.63125  | 0.79059 | 0.99966 | 0.02786  | 0.01123 | -1.65898 | 10.10701 | -0.4   | 2.45  | -612.50  |
| 86  | 0.6566 | -5.62193 | 0.63628  | 0.86068 | 0.55208 | -0.02577 | 0.04185 | 135.9799 | 218.6853 | 1.58018 | 1.01422 | 0.02897  | 0.01145 | 2.03468  | 12.36307 | 0.49   | 3     | 612.24   |
| 87  | 0.656  | 59.22817 | 31.27112 | 2.2733  | 3.45889 | 0.36024  | 0.26688 | 179.5052 | 93.94032 | 4.17791 | 6.36701 | 0.02688  | 0.06671 | -47.1416 | 60.90125 | -11.48 | 14.88 | -129.62  |
| 88  | 0.6581 | -13.4451 | 2.20463  | 0.61375 | 1.01865 | -0.17072 | 0.06744 | 374.7639 | 136.2561 | 1.12664 | 1.87071 | 0.03572  | 0.0195  | 37.03996 | 19.18979 | 8.97   | 4.64  | 51.73    |
| 89  | 0.6633 | 83.68118 | 4.79869  | 0.23704 | 0.38129 | 0.24868  | 0.0287  | 87.82246 | 8.81197  | 0.43501 | 0.69984 | 0.02762  | 0.00798 | 10.1884  | 7.39729  | 2.47   | 1.79  | 72.47    |
| 90  | 0.6668 | 31.71324 | 2.6361   | 0.66786 | 0.59605 | 0.0554   | 0.03386 | 51.46666 | 31.2781  | 1.226   | 1.09471 | 0.04127  | 0.0114  | 15.39308 | 10.00692 | 3.73   | 2.42  | 64.88    |
| 91  | 0.6714 | 40.00605 | 2.36972  | 1.60048 | 0.34694 | 0.11141  | 0.01981 | 82.02173 | 13.8131  | 2.93999 | 0.63803 | 0.01911  | 0.00609 | 7.1952   | 5.54563  | 1.75   | 1.34  | 76.57    |
| 92  | 0.6793 | 1.25347  | 0.15089  | 0.72272 | 0.17963 | -0.01338 | 0.01066 | -327.94  | 259.7264 | 1.32677 | 0.32993 | 0.01791  | 0.00327 | 5.23976  | 3.1574   | 1.27   | 0.77  | 60.63    |
| 93  | 0.6849 | 8.60249  | 0.55154  | 0.99853 | 0.23531 | 0.03805  | 0.01866 | 130.1981 | 63.83682 | 1.83345 | 0.43237 | 0.01715  | 0.00603 | -2.59065 | 5.47749  | -0.63  | 1.33  | -211.11  |
| 94  | 0.702  | 8.65684  | 0.16044  | 0.18319 | 0.07989 | 0.00454  | 0.00469 | 15.35991 | 16.07806 | 0.33618 | 0.14663 | 0.00131  | 0.00166 | 7.30297  | 1.39436  | 1.77   | 0.34  | 19.21    |
| 95  | 0.7116 | 7.3644   | 0.2613   | 0.53216 | 0.16564 | 0.01227  | 0.00819 | 48.82119 | 32.96745 | 0.97682 | 0.30416 | 0.02259  | 0.00322 | 3.75523  | 2.4235   | 0.91   | 0.59  | 64.84    |
| 96  | 0.7188 | 131.6933 | 6.05665  | 1.01311 | 0.21412 | 0.40158  | 0.02294 | 90.06449 | 3.07279  | 1.86024 | 0.39344 | 0.01477  | 0.0051  | 13.09082 | 4.09644  | 3.17   | 0.99  | 31.23    |
| 97  | 0.7331 | 138.7467 | 3.1757   | 0.90702 | 0.12181 | 0.47019  | 0.01343 | 100.1076 | 1.75168  | 1.66532 | 0.22379 | 0.01924  | 0.00251 | -0.14929 | 2.4314   | -0.04  | 0.59  | -1475.00 |
| 98  | 0.7396 | 68.82569 | 3.2876   | 0.98828 | 0.20787 | 0.21694  | 0.01514 | 93.06516 | 4.76489  | 1.81462 | 0.38195 | 0.03465  | 0.00434 | 4.77423  | 3.28959  | 1.16   | 0.8   | 68.97    |
| 99  | 0.7452 | 1602.271 | 85.24481 | 0.22432 | 0.25225 | 5.51801  | 0.29555 | 101.767  | 0.68751  | 0.41165 | 0.463   | 0.01888  | 0.00634 | -28.3162 | 11.10421 | -6.89  | 2.71  | -39.33   |
| 100 | 0.7543 | 7.12476  | 0.29254  | 0.15964 | 0.17882 | 0.00472  | 0.01032 | 19.45288 | 42.96795 | 0.29295 | 0.32818 | 0.00203  | 0.00313 | 5.71552  | 3.05995  | 1.39   | 0.74  | 53.24    |
| 101 | 0.7632 | 85.66933 | 1.88677  | 0.38729 | 0.24087 | 0.30316  | 0.01484 | 104.5675 | 4.58406  | 0.71081 | 0.4422  | 0.02479  | 0.00232 | -3.91269 | 3.92745  | -0.95  | 0.95  | -100.00  |
| 102 | 0.7687 | 100.3968 | 3.61926  | 2.26664 | 0.35916 | 0.32988  | 0.0223  | 96.9357  | 5.5608   | 4.16564 | 0.66112 | 0.02211  | 0.00441 | 3.08048  | 5.59164  | 0.75   | 1.36  | 181.33   |
| 103 | 0.7802 | 6.56826  | 0.2074   | 0.39659 | 0.18692 | 0.01466  | 0.0095  | 65.75577 | 42.90011 | 0.72788 | 0.34316 | 0.00986  | 0.0022  | 2.23971  | 2.80791  | 0.54   | 0.68  | 125.93   |
| 104 | 0.8176 | 9.32296  | 0.09825  | 0.25151 | 0.05626 | 0.01146  | 0.00274 | 36.22944 | 8.71082  | 0.46158 | 0.10326 | -0.00002 | 0.0007  | 5.92742  | 0.81241  | 1.44   | 0.2   | 13.89    |
| 105 | 0.8425 | 3.40741  | 0.06964  | 0.34229 | 0.08008 | 0.00378  | 0.00649 | 32.23524 | 36.6987  | 0.62821 | 0.14701 | 0.00164  | 0.00086 | 2.28945  | 1.24124  | 0.56   | 0.3   | 53.57    |
| 106 | 0.8595 | 3.29358  | 0.07165  | 0.14788 | 0.11048 | 0.00445  | 0.00462 | 39.93308 | 59.97445 | 0.27137 | 0.20275 | 0.00058  | 0.00141 | 1.96072  | 1.95863  | 0.48   | 0.48  | 100.00   |
| 107 | 0.8645 | 12.92364 | 0.603    | 0.98651 | 0.37535 | 0.04513  | 0.02106 | 102.8047 | 48.10057 | 1.81137 | 0.68968 | 0.00992  | 0.00438 | -0.36188 | 6.20624  | -0.09  | 1.51  | -1677.78 |
| 108 | 0.8717 | 3.76455  | 0.19815  | 0.89357 | 0.28151 | 0.01631  | 0.01483 | 127.074  | 117.4315 | 1.64061 | 0.51719 | 0.00135  | 0.00318 | -1.01182 | 4.38695  | -0.25  | 1.07  | -428.00  |
| 109 | 0.8826 | 5.8516   | 0.1552   | 0.50047 | 0.20376 | 0.01334  | 0.00996 | 67.00053 | 50.54598 | 0.91861 | 0.37414 | 0.02582  | 0.00191 | 1.92188  | 2.94487  | 0.47   | 0.71  | 151.06   |
| 110 | 0.8867 | 29.26171 | 1.83952  | 1.39412 | 0.53015 | 0.1094   | 0.02976 | 110.2012 | 29.32101 | 2.56054 | 0.97467 | 0.02664  | 0.00602 | -2.98497 | 8.58028  | -0.72  | 2.08  | -288.89  |
| 111 | 0.9161 | 10.15962 | 0.13936  | 0.10425 | 0.04848 | 0.01464  | 0.00305 | 42.61426 | 8.87507  | 0.1913  | 0.08897 | 0.00102  | 0.00092 | 5.81356  | 0.90334  | 1.41   | 0.22  | 15.60    |
| 112 | 0.9294 | 159.232  | 3.97841  | 0.79805 | 0.12751 | 0.5372   | 0.01687 | 99.66997 | 1.94652  | 1.46513 | 0.23422 | 0.01968  | 0.00204 | 0.52572  | 3.10096  | 0.13   | 0.75  | 576.92   |
| 113 | 0.9391 | 244.6505 | 7.93427  | 0.82756 | 0.17434 | 0.80856  | 0.03077 | 97.646   | 1.97524  | 1.51935 | 0.32027 | 0.02115  | 0.00304 | 5.76173  | 4.84018  | 1.4    | 1.17  | 83.57    |
| 114 | 0.953  | 6.1931   | 0.19569  | 0.46915 | 0.09741 | 0.01818  | 0.00597 | 86.54912 | 28.58925 | 0.86112 | 0.17885 | 0.00907  | 0.00188 | 0.82931  | 1.7639   | 0.2    | 0.43  | 215.00   |
| 115 | 0.9596 | 31.3518  | 1.3612   | 1.38121 | 0.22553 | 0.06014  | 0.01521 | 56.37005 | 14.15376 | 2.53681 | 0.41463 | 0.00914  | 0.00394 | 13.67917 | 4.48256  | 3.32   | 1.09  | 32.83    |
| 116 | 0.9641 | 120.6655 | 6.95523  | 0.89069 | 0.31    | 0.39116  | 0.03205 | 95.75378 | 5.59058  | 1.63532 | 0.56953 | 0.02563  | 0.00653 | 5.12569  | 6.75575  | 1.24   | 1.64  | 132.26   |
| 117 | 0.9744 | 21.16434 | 0.70301  | 2.49179 | 0.17375 | 0.05295  | 0.00911 | 73.06811 | 12.52124 | 4.58016 | 0.31993 | 0.00592  | 0.00274 | 5.70201  | 2.65973  | 1.38   | 0.65  | 47.10    |
| 118 | 0.9784 | 13.76417 | 0.92672  | 0.30855 | 0.37369 | 0.05154  | 0.02246 | 110.7001 | 47.92997 | 0.56627 | 0.68597 | 0.03116  | 0.00646 | -1.46992 | 6.58255  | -0.36  | 1.6   | -444.44  |
| 119 | 0.9882 | 35.09228 | 1.12089  | 0.253   | 0.15327 | 0.11228  | 0.01164 | 94.56911 | 9.95915  | 0.4643  | 0.28133 | 0.02539  | 0.00311 | 1.90455  | 3.28324  | 0.46   | 0.8   | 173.91   |
| 120 | 0.9972 | 7.73765  | 0.27987  | 0.84097 | 0.18738 | 0.01961  | 0.00928 | 74.27116 | 35.52564 | 1.54398 | 0.34422 | 0.00813  | 0.00272 | 1.98435  | 2.74264  | 0.48   | 0.67  | 139.58   |
| 121 | 1      | 53.46829 | 4.03482  | 2.27495 | 0.62782 | 0.14857  | 0.05186 | 81.80206 | 28.01139 | 4.18093 | 1.15568 | 0.03432  | 0.01228 | 9.74038  | 15.01271 | 2.36   | 3.64  | 154.24   |

|            |         |         |         |         |         |        |          |         |         |         |         |         |         |         |      |      |       |
|------------|---------|---------|---------|---------|---------|--------|----------|---------|---------|---------|---------|---------|---------|---------|------|------|-------|
| Integrated | 59.7706 | 0.17525 | 0.76663 | 0.01827 | 0.19069 | 0.0014 | 94.21872 | 0.63938 | 1.40742 | 0.03356 | 0.01949 | 0.00029 | 3.45566 | 0.38243 | 0.84 | 0.09 | 10.71 |
|------------|---------|---------|---------|---------|---------|--------|----------|---------|---------|---------|---------|---------|---------|---------|------|------|-------|

# NABESNA RIVER

Weighted average of J from standards = 9.109e-05 +/- 5.287e-07

| Grain # | Cumulative 40Ar/39Ar +/- 39Ar meas. | 37Ar/39Ar +/- meas. | 36Ar/39Ar +/- meas. | % Atm. 40Ar +/- | Ca/K +/- | Cl/K +/- | 40*/39K +/- | Age (Ma) | +/- (Ma) | %error    |
|---------|-------------------------------------|---------------------|---------------------|-----------------|----------|----------|-------------|----------|----------|-----------|
| 1       | 0.0053                              | 110.2699            | 0.90841             | 1.8432          | 0.03063  | 0.27872  | 0.00617     | 74.57324 | 1.54794  | 3.38643</ |

|    |        |          |          |          |         |         |         |          |          |          |         |          |         |          |          |       |      |       |
|----|--------|----------|----------|----------|---------|---------|---------|----------|----------|----------|---------|----------|---------|----------|----------|-------|------|-------|
| 31 | 0.2608 | 820.6472 | 6.07638  | 2.2551   | 0.03594 | 2.65793 | 0.02467 | 95.68802 | 0.5386   | 4.14439  | 0.06615 | 0.04174  | 0.00128 | 35.44134 | 4.43578  | 5.81  | 0.73 | 12.56 |
| 32 | 0.2631 | 3900.736 | 61.01218 | 5.46387  | 0.10538 | 12.6934 | 0.20148 | 96.14798 | 0.26558  | 10.06429 | 0.19486 | 0.00271  | 0.00547 | 150.8382 | 10.67499 | 24.59 | 1.73 | 7.04  |
| 33 | 0.2674 | 60.95549 | 0.55697  | 1.97732  | 0.03192 | 0.08622 | 0.0047  | 41.55137 | 2.24868  | 6.33319  | 0.05874 | 0.00475  | 0.00088 | 35.66011 | 1.41148  | 5.84  | 0.23 | 3.94  |
| 34 | 0.2712 | 1032.896 | 10.82656 | 4.52892  | 0.06384 | 3.30592 | 0.03885 | 94.54509 | 0.50528  | 8.3366   | 0.11789 | 0.01026  | 0.00178 | 56.52268 | 5.27105  | 9.25  | 0.86 | 9.30  |
| 35 | 0.2757 | 37.03631 | 0.22802  | 2.6349   | 0.03085 | 0.10285 | 0.00379 | 81.53854 | 2.98583  | 4.84369  | 0.05681 | 0.07581  | 0.00173 | 6.84471  | 1.10811  | 1.12  | 0.18 | 16.07 |
| 36 | 0.2888 | 463.4722 | 2.28032  | 0.56478  | 0.00701 | 1.50991 | 0.00946 | 96.26466 | 0.37772  | 1.0367   | 0.01287 | 0.01415  | 0.00048 | 17.31808 | 1.75403  | 2.84  | 0.29 | 10.21 |
| 37 | 0.2958 | 201.611  | 1.39452  | 1.24838  | 0.02447 | 0.58291 | 0.00821 | 85.39885 | 1.07602  | 2.29262  | 0.04497 | 0.01799  | 0.00088 | 29.45916 | 2.18975  | 4.83  | 0.36 | 7.45  |
| 38 | 0.3016 | 40.30892 | 0.22156  | 0.96329  | 0.02372 | 0.05371 | 0.00396 | 39.20397 | 2.89971  | 1.76871  | 0.04359 | 0.00711  | 0.00063 | 24.50485 | 1.17938  | 4.02  | 0.19 | 4.73  |
| 39 | 0.3108 | 31.0818  | 0.17961  | 0.23008  | 0.01327 | 0.00441 | 0.00248 | 4.13835  | 2.36202  | 0.42224  | 0.02436 | -0.00051 | 0.00035 | 29.7719  | 1.75386  | 4.88  | 0.12 | 2.46  |
| 40 | 0.3126 | 2292.312 | 39.345   | 8.9694   | 0.17515 | 3.36728 | 0.06315 | 43.37564 | 0.32909  | 16.56252 | 0.32548 | 0.01475  | 0.0024  | 1306.265 | 23.81678 | 202.6 | 3.49 | 1.72  |
| 41 | 0.3187 | 23.37521 | 0.12674  | 0.56331  | 0.02079 | 0.05368 | 0.00388 | 67.74482 | 4.90678  | 1.034    | 0.03819 | 0.02381  | 0.00072 | 7.53314  | 1.14783  | 1.24  | 0.19 | 15.32 |
| 42 | 0.325  | 73.74489 | 0.49357  | 0.452    | 0.02056 | 0.14053 | 0.0037  | 56.28326 | 1.44304  | 0.82963  | 0.03775 | 0.00328  | 0.00053 | 32.23617 | 1.09157  | 5.28  | 0.18 | 3.41  |
| 43 | 0.3277 | 583.2794 | 8.61753  | 3.8744   | 0.06804 | 1.88454 | 0.0298  | 95.42429 | 0.59715  | 7.1285   | 0.12554 | 0.00543  | 0.00115 | 26.76105 | 3.53062  | 4.39  | 0.58 | 13.21 |
| 44 | 0.3321 | 30.94589 | 0.21327  | 0.96836  | 0.02545 | 0.08763 | 0.00418 | 83.50195 | 3.95383  | 1.77802  | 0.04676 | 0.00346  | 0.00056 | 5.10406  | 1.22401  | 0.84  | 0.2  | 23.81 |
| 45 | 0.3508 | 221.5779 | 1.01542  | 0.12691  | 0.0068  | 0.63583 | 0.00394 | 84.80146 | 0.35748  | 0.23289  | 0.01248 | 0.00669  | 0.00022 | 33.6751  | 0.8083   | 5.52  | 0.13 | 2.36  |
| 46 | 0.3565 | 149.0512 | 0.96252  | 0.77451  | 0.02619 | 0.40758 | 0.00453 | 80.77727 | 0.76357  | 1.42189  | 0.04811 | 0.00521  | 0.00068 | 28.66169 | 1.16477  | 4.7   | 0.19 | 4.04  |
| 47 | 0.3687 | 60.56856 | 0.21912  | 1.18861  | 0.01094 | 0.17241 | 0.00187 | 83.99412 | 0.90891  | 2.18277  | 0.0201  | 0.02334  | 0.00042 | 9.69792  | 0.55711  | 1.59  | 0.09 | 5.66  |
| 48 | 0.3731 | 3.46365  | 0.06057  | 1.04797  | 0.08002 | 0.00673 | 0.00319 | 55.35985 | 27.43161 | 1.92431  | 0.14704 | 0.04101  | 0.0011  | 1.53407  | 0.94399  | 0.25  | 0.15 | 60.00 |
| 49 | 0.3964 | 148.4206 | 0.46685  | 0.04046  | 0.00492 | 0.09395 | 0.00115 | 18.70676 | 0.22066  | 0.07425  | 0.00903 | 0.01239  | 0.0002  | 120.6352 | 0.50242  | 19.69 | 0.08 | 0.41  |
| 50 | 0.3983 | 795.2697 | 7.71492  | 16.61153 | 0.18526 | 0.65005 | 0.01734 | 23.98287 | 0.60528  | 30.84168 | 0.34804 | 0.01519  | 0.00207 | 611.6949 | 7.81059  | 97.71 | 1.21 | 1.24  |
| 51 | 0.4008 | 183.7978 | 1.64336  | 1.61929  | 0.04938 | 0.53792 | 0.01017 | 86.42465 | 1.46301  | 2.97457  | 0.09081 | 0.01383  | 0.00138 | 24.97573 | 2.7071   | 4.1   | 0.44 | 10.73 |
| 52 | 0.4074 | 22.48321 | 0.10062  | 0.45905  | 0.01688 | 0.01273 | 0.00235 | 16.57954 | 3.09598  | 0.84256  | 0.03099 | 0.00321  | 0.00045 | 18.73691 | 0.70075  | 3.07  | 0.11 | 3.58  |
| 53 | 0.4176 | 177.1467 | 0.86249  | 0.64255  | 0.01657 | 0.49604 | 0.00518 | 82.72936 | 0.76619  | 1.17953  | 0.03042 | 0.01927  | 0.00053 | 30.60311 | 1.36643  | 5.02  | 0.22 | 4.38  |
| 54 | 0.4235 | 108.668  | 0.91128  | 1.34587  | 0.02562 | 0.31016 | 0.00406 | 84.26133 | 0.87816  | 2.47183  | 0.04709 | 0.0157   | 0.00054 | 17.11449 | 0.9717   | 2.81  | 0.16 | 5.69  |
| 55 | 0.4297 | 41.92899 | 0.19977  | 1.40507  | 0.08049 | 0.02054 | 0.00361 | 56.4914  | 2.53387  | 2.58067  | 0.03777 | 0.02379  | 0.00076 | 18.24791 | 1.06744  | 2.99  | 0.17 | 5.69  |
| 56 | 0.4367 | 17.80415 | 0.08769  | 1.42824  | 0.02377 | 0.04449 | 0.00263 | 73.29693 | 4.36575  | 2.62327  | 0.0437  | 0.05262  | 0.00066 | 4.75112  | 0.77762  | 0.78  | 0.13 | 16.67 |
| 57 | 0.4523 | 163.2442 | 0.74754  | 0.38553  | 0.00746 | 0.11099 | 0.00154 | 20.07476 | 0.26297  | 0.70759  | 0.01369 | 0.05712  | 0.00041 | 130.4851 | 0.73703  | 21.29 | 0.12 | 0.56  |
| 58 | 0.4561 | 366.1737 | 3.49173  | 2.54541  | 0.04421 | 1.16538 | 0.01296 | 93.99611 | 0.95987  | 4.67888  | 0.08142 | 0.0234   | 0.00144 | 22.02246 | 2.2087   | 3.61  | 0.36 | 9.97  |
| 59 | 0.4618 | 50.50115 | 0.48346  | 1.97915  | 0.02913 | 0.10224 | 0.00431 | 59.53868 | 2.46115  | 3.63655  | 0.0536  | 0.02833  | 0.0007  | 20.45002 | 1.26107  | 3.35  | 0.21 | 6.27  |
| 60 | 0.4714 | 62.32913 | 0.38948  | 0.25004  | 0.01295 | 0.0814  | 0.00246 | 38.57565 | 1.14469  | 0.45888  | 0.02378 | 0.00166  | 0.00037 | 38.27378 | 0.75677  | 6.27  | 0.12 | 1.91  |
| 61 | 0.4776 | 78.67879 | 0.3488   | 2.04147  | 0.02324 | 0.2365  | 0.0049  | 88.6422  | 1.82424  | 3.75122  | 0.04277 | 0.03355  | 0.00072 | 8.94571  | 1.43979  | 1.47  | 0.24 | 16.33 |
| 62 | 0.4893 | 10.53301 | 0.06277  | 0.72844  | 0.01031 | 0.01328 | 0.00413 | 36.80231 | 4.0057   | 1.33728  | 0.01893 | 0.00989  | 0.00035 | 6.64127  | 0.42301  | 1.09  | 0.07 | 6.42  |
| 63 | 0.4941 | 2.09696  | 0.05324  | 0.93195  | 0.02872 | 0.00099 | 0.00451 | 10.38941 | 64.42142 | 1.71112  | 0.05276 | 0.00099  | 0.00099 | 1.85372  | 1.33367  | 0.3   | 0.22 | 73.33 |
| 64 | 0.5038 | 36.81345 | 0.21059  | 0.99704  | 0.01439 | 0.03813 | 0.00182 | 30.4067  | 1.45308  | 1.83072  | 0.02644 | 0.0215   | 0.00056 | 25.61707 | 0.55659  | 4.2   | 0.09 | 2.14  |
| 65 | 0.5116 | 6.59542  | 0.05737  | 0.98234  | 0.01793 | 0.00484 | 0.00214 | 20.53335 | 9.64348  | 1.80371  | 0.03294 | 0.0397   | 0.00066 | 5.2212   | 0.63539  | 0.86  | 0.1  | 11.63 |
| 66 | 0.5144 | 94.58303 | 0.92249  | 3.20967  | 0.05727 | 0.19598 | 0.0076  | 60.96952 | 2.30677  | 5.90268  | 0.10556 | 0.03837  | 0.00131 | 36.98849 | 2.22033  | 6.06  | 0.36 | 5.94  |
| 67 | 0.5182 | 17.34618 | 0.14187  | 0.92489  | 0.03847 | 0.03687 | 0.00552 | 62.47108 | 9.40526  | 1.69816  | 0.03698 | 0.02284  | 0.00113 | 6.50294  | 1.63079  | 1.07  | 0.27 | 25.23 |
| 68 | 0.5188 | 582.3257 | 22.44223 | 0.38557  | 0.43222 | 1.7975  | 0.07859 | 91.08535 | 1.90565  | 17.33614 | 0.80669 | 0.02714  | 0.005   | 52.25601 | 11.36575 | 8.56  | 1.86 | 21.73 |
| 69 | 0.5296 | 36.75673 | 0.18369  | 0.12994  | 0.01239 | 0.03697 | 0.0021  | 29.71996 | 1.68151  | 0.23844  | 0.02274 | 0.00003  | 0.00044 | 25.81414 | 0.63248  | 4.23  | 0.1  | 2.36  |
| 70 | 0.5482 | 41.54066 | 0.11856  | 0.03248  | 0.00607 | 0.06845 | 0.00118 | 48.72131 | 0.83624  | 0.0596   | 0.01114 | 0.00034  | 0.00016 | 21.28676 | 0.35728  | 3.49  | 0.06 | 1.72  |
| 71 | 0.5659 | 26.13794 | 0.19462  | 0.15953  | 0.00698 | 0.0004  | 0.00117 | 0.39715  | 1.32123  | 0.29275  | 0.01282 | 0.00136  | 0.00018 | 26.00748 | 0.39578  | 4.26  | 0.06 | 1.41  |
| 72 | 0.5697 | 65.12334 | 0.61035  | 0.03669  | 0.03364 | 0.10952 | 0.00535 | 49.71113 | 2.38413  | 0.06732  | 0.06173 | -0.00056 | 0.00091 | 32.7357  | 1.58365  | 5.37  | 0.26 | 4.84  |
| 73 | 0.5743 | 283.0642 | 1.92864  | 2.53419  | 0.03208 | 0.87019 | 0.01286 | 90.77808 | 1.2242   | 4.65822  | 0.05908 | 0.01754  | 0.00122 | 26.148   | 3.48513  | 4.29  | 0.57 | 13.29 |
| 74 | 0.5933 | 952.4906 | 3.92772  | 0.56556  | 0.00798 | 0.14086 | 0.00124 | 4.36516  | 0.03412  | 1.03814  | 0.01465 | 0.00101  | 0.0002  | 911.2484 | 3.77498  | 143.7 | 0.57 | 0.40  |
| 75 | 0.6033 | 137.651  | 0.68371  | 0.50964  | 0.0139  | 0.38173 | 0.00484 | 81.93468 | 0.97328  | 0.93546  | 0.02553 | 0.00422  | 0.00039 | 24.87068 | 1.35061  | 4.08  | 0.22 | 5.39  |
| 76 | 0.6057 | 170.475  | 2.44473  | 1.39393  | 0.05213 | 0.1775  | 0.00788 | 30.70637 | 1.29438  | 2.56018  | 0.09584 | 0.02065  | 0.00114 | 118.2242 | 2.78967  | 19.3  | 0.45 | 2.33  |
| 77 | 0.6111 | 12.07893 | 0.08927  | 0.2118   | 0.02791 | 0.00665 | 0.00233 | 16.17058 | 5.71913  | 0.38868  | 0.05122 | 0.03743  | 0.00088 | 10.10232 | 0.69367  | 1.66  | 0.11 | 6.63  |
| 78 | 0.6152 | 44.62502 | 0.3645   | 0.35165  | 0.02809 | 0.05022 | 0.00398 | 33.20958 | 2.62178  | 0.64539  | 0.05156 | 0.00111  | 0.00078 | 29.79281 | 1.19569  | 4.88  | 0.2  | 4.10  |
| 79 | 0.6208 | 49.1718  | 0.41223  | 0.75263  | 0.04036 | 0.07668 | 0.00356 | 45.98446 | 2.11049  | 1.38171  | 0.07413 | 0.00302  | 0.00087 | 26.5585  | 1.06308  | 4.35  | 0.17 | 3.91  |
| 80 | 0.6305 | 13.1062  | 0.06579  | 1.33013  | 0.02431 | 0.03442 | 0.00173 | 76.94311 | 3.90689  | 2.44289  | 0.04668 | 0.00909  | 0.00044 | 3.01788  | 0.5119   | 0.5   | 0.08 | 16.00 |
| 81 | 0.6374 | 17.74854 | 0.11326  | 1.33842  | 0.02255 | 0.04686 | 0.00265 | 77.53091 | 4.38895  | 2.45814  | 0.04146 | 0.06467  | 0.00098 | 3.98503  | 0.77913  | 0.65  | 0.13 | 20.00 |
| 82 | 0.6486 | 279.5663 | 1.75485  | 1.07208  | 0.01776 | 0.90655 | 0.00701 | 95.80037 | 0.43588  | 1.96861  | 0.03264 | 0.0253   | 0.00057 | 11.74839 | 1.22205  | 1.93  | 0.2  | 10.36 |
| 83 | 0.6708 | 45.25353 | 0.20676  | 0.0594   | 0.00642 | 0.05425 | 0.00101 | 35.43647 | 0.64221  | 0.109    | 0.01178 | 0.00029  | 0.0002  | 29.19933 | 0.32343  | 4.79  | 0.05 | 1.04  |
| 84 | 0.6892 | 50.20786 | 0.22149  | 0.20781  | 0.00755 | 0.08567 | 0.00134 | 50.41931 | 0.77154  | 0.38135  | 0.01386 | 0.00063  | 0.00027 | 24.88233 | 0.40884  | 4.08  | 0.07 | 1.72  |
| 85 | 0.701  | 72.24457 | 0.30655  | 0.12066  | 0.00888 | 0.13673 | 0.00182 | 55.93746 | 0.73023  | 0.22142  | 0.0163  | 0.00032  | 0.00042 | 31.82242 | 0.55657  | 5.22  | 0.09 | 1.72  |
| 86 | 0.7286 | 39.84457 | 0.11914  | 0.06082  | 0.00392 | 0.02568 | 0.00077 | 19.04607 | 0.57226  | 0.1116   | 0.0072  | 0.00056  | 0.00021 | 32.23309 | 0.25192  | 5.28  | 0.04 | 0.76  |
| 87 | 0.7458 | 87.26481 | 0.31602  | 0.01013  | 0.00676 | 0.21118 | 0.00155 | 71.53451 |          |          |         |          |         |          |          |       |      |       |

Integrated 135.5701 0.08784 0.74679 0.00168 0.28415 0.00039 61.9048 0.07531 1.37097 0.00309 0.01183 0.00005 51.66164 0.10851 8.46 0.05 0.59

MONTE CRISTO CREEK

Weighted average of J from standards = 9.588e-05 +/- 4.822e-07

| Grain # | Cumulative 40Ar/39Ar +/- meas. | 37Ar/39Ar +/- meas. | 36Ar/39Ar +/- meas. | % Atm. 40Ar | +/-      | Ca/K     | +/-      | Cl/K     | +/-      | 40*/39K   | +/-      | Age (Ma)  | +/- (Ma) | %error |        |
|---------|--------------------------------|---------------------|---------------------|-------------|----------|----------|----------|----------|----------|-----------|----------|-----------|----------|--------|--------|
| 1       | 0.0135 77.92563                | 1.06647 2.652       | 0.04833 0.22057     | 0.00854     | 83.39263 | 3.04346  | 4.87519  | 0.08901  | 0.00747  | 0.00125   | 12.96075 | 2.38394   | 2.24     | 0.41   | 18.30  |
| 2       | 0.0307 8.62804                 | 0.08088 1.80345     | 0.0306 0.00005      | 0.00532     | -1.54188 | 18.27403 | 3.3133   | 0.05629  | 0.03475  | 0.00205   | 8.74209  | 1.5754    | 1.51     | 0.27   | 17.88  |
| 3       | 0.0432 17.7033                 | 0.17791 3.80195     | 0.06842 0.03844     | 0.00621     | 62.49612 | 10.36524 | 6.99483  | 0.12622  | 0.04664  | 0.00139   | 6.64616  | 1.83879   | 1.15     | 0.32   | 27.83  |
| 4       | 0.0543 33.16158                | 0.43747 1.7471      | 0.04582 0.08391     | 0.01411     | 74.40324 | 12.55185 | 3.20965  | 0.08427  | 0.0329   | 0.00146   | 8.49117  | 4.16575   | 1.47     | 0.72   | 48.98  |
| 5       | 0.0586 71.63528                | 2.44036 7.20653     | 0.29751 0.21657     | 0.02181     | 88.54446 | 4.848372 | 13.29062 | 0.55149  | 0.03168  | 0.00354   | 8.24478  | 6.11375   | 1.42     | 1.06   | 74.65  |
| 6       | 0.0795 8.36079                 | 0.06007 1.10804     | 0.02611 0.0017      | 0.00356     | 4.93143  | 12.63757 | 2.0347   | 0.04799  | 0.04071  | 0.00102   | 7.92648  | 1.05528   | 1.37     | 0.18   | 13.14  |
| 7       | 0.0877 75.51036                | 1.09295 7.7603      | 0.13626 0.23106     | 0.0125      | 89.60965 | 4.72009  | 14.31754 | 0.25279  | 0.08808  | 0.00248   | 7.88594  | 3.58472   | 1.36     | 0.62   | 45.59  |
| 8       | 0.1028 217.1525                | 2.67947 7.5569      | 0.11329 0.70756     | 0.01178     | 96.07848 | 1.08477  | 10.60624 | 0.20957  | 0.03629  | 0.00187   | 8.54929  | 2.36812   | 1.48     | 0.41   | 27.70  |
| 9       | 0.1145 -10.9317                | 0.19199 1.71692     | 0.04282 -0.05662    | 0.00847     | 153.9191 | 22.74226 | 3.15413  | 0.07876  | 0.03746  | 0.00127   | 5.91746  | 2.49549   | 1.02     | 0.43   | 42.16  |
| 10      | 0.1246 -9.24927                | 0.17088 1.59576     | 0.04808 -0.05234    | 0.00973     | 168.0908 | 30.95945 | 2.93131  | 0.08843  | 0.03866  | 0.00194   | 6.32523  | 2.87397   | 1.09     | 0.5    | 45.87  |
| 11      | 0.1246 3725.536                | 13947.732 0.81037   | 10.61525 9.3366     | 35.10837    | 74.05435 | 26.05653 | 1.48778  | 19.49984 | -0.38673 | 1.54424   | 967.1604 | 3751.0623 | 159.8    | 593.1  | 371.15 |
| 12      | 0.1317 -18.3052                | 0.33146 1.44912     | 0.05059 -0.08125    | 0.01409     | 131.6044 | 22.62422 | 2.66165  | 0.09302  | 0.00871  | 0.00162   | 5.80056  | 4.15186   | 1        | 0.72   | 72.00  |
| 13      | 0.1425 -12.1858                | 0.17397 1.17474     | 0.03593 -0.06591    | 0.00851     | 160.2294 | 20.5544  | 2.15727  | 0.06604  | 0.04048  | 0.00223   | 7.36339  | 2.51131   | 1.27     | 0.43   | 33.86  |
| 14      | 0.1424 14.41542                | 25.71683 1.1119     | 3.87075 -0.84525    | 1.932       | -1736.89 | 3497.151 | 2.04178  | 7.11347  | -0.01059 | 0.22939   | 264.4577 | 585.79939 | 45.12    | 98.71  | 218.77 |
| 15      | 0.1511 1.492                   | 0.1362 1.81877      | 0.0681 -0.04853     | 0.01432     | -990.968 | 302.6593 | 3.34148  | 0.12528  | 0.01058  | 0.00159   | 15.97418 | 4.24174   | 2.76     | 0.73   | 26.45  |
| 16      | 0.1641 35.79676                | 0.4898 2.25638      | 0.06513 -0.02839    | 0.00742     | -23.9781 | 6.12038  | 4.14676  | 0.11989  | 0.00653  | 0.001     | 44.41416 | 2.27164   | 7.66     | 0.39   | 5.09   |
| 17      | 0.1709 27.34389                | 0.50632 2.2221      | 0.06593 0.06683     | 0.01761     | 71.63424 | 19.01479 | 4.08365  | 0.12136  | 0.00838  | 0.0017    | 7.76007  | 5.20468   | 1.34     | 0.9    | 67.16  |
| 18      | 0.1741 1317.839                | 30.45236 11.38511   | 0.34202 4.37182     | 0.11264     | 97.96073 | 1.12475  | 21.05944 | 0.63778  | 0.11024  | 0.0065    | 27.09157 | 14.95768  | 4.67     | 2.58   | 55.25  |
| 19      | 0.1801 8.50493                 | 0.17726 1.99684     | 0.07014 -0.02108    | 0.01369     | -75.4477 | 47.7324  | 3.6691   | 0.12906  | 0.03824  | 0.00252   | 14.89067 | 4.05552   | 2.57     | 0.7    | 27.24  |
| 20      | 0.188 49.35883                 | 0.63572 2.09569     | 0.08204 0.12845     | 0.01202     | 76.59867 | 7.14352  | 3.85101  | 0.15098  | 0.03227  | 0.00306   | 11.56079 | 3.53413   | 2        | 0.61   | 30.50  |
| 21      | 0.1936 166.1621                | 4.69345 4.411       | 0.16198 0.51165     | 0.02754     | 90.7892  | 4.18071  | 8.11887  | 0.29906  | 0.04509  | 0.00412   | 15.34996 | 6.98263   | 2.65     | 1.2    | 45.28  |
| 22      | 0.1977 13.45401                | 0.37888 6.45365     | 0.21816 0.00592     | 0.01631     | 9.0579   | 35.90239 | 11.89577 | 0.40396  | 0.04004  | 0.00288   | 12.26437 | 4.85496   | 2.12     | 0.84   | 39.62  |
| 23      | 0.2023 360.7465                | 8.50825 5.22626     | 0.16452 1.15834     | 0.03616     | 94.77237 | 1.95467  | 9.62499  | 0.30411  | 0.03726  | 0.00246   | 18.92682 | 7.09401   | 3.27     | 1.22   | 37.31  |
| 24      | 0.2202 10.12487                | 0.10984 1.12792     | 0.04037 0.00044     | 0.00439     | 0.37136  | 12.85058 | 2.07122  | 0.07419  | 0.02658  | 0.00076   | 10.06572 | 1.30296   | 1.74     | 0.22   | 12.64  |
| 25      | 0.2256 9.51952                 | 0.32831 1.60204     | 0.0884 0.01952      | 0.00891     | 59.39027 | 27.69105 | 2.94286  | 0.16257  | 0.02458  | 0.00239   | 3.85817  | 2.63686   | 0.67     | 0.46   | 68.66  |
| 26      | 0.2431 20.80152                | 0.31824 0.19764     | 0.02136 0.02104     | 0.00461     | 29.85319 | 6.53859  | 0.36269  | 0.0392   | 0.00458  | 0.00078   | 14.5728  | 1.37744   | 2.52     | 0.24   | 9.52   |
| 27      | 0.2461 689.2406                | 22.73943 6.68047    | 0.26991 2.26253     | 0.09303     | 96.96211 | 2.38245  | 12.31586 | 0.49996  | 0.05043  | 0.0052    | 21.28599 | 16.51354  | 3.67     | 2.85   | 77.66  |
| 28      | 0.252 18.15158                 | 0.48403 2.78805     | 0.116 0.01804       | 0.01255     | 28.14408 | 20.45951 | 5.12577  | 0.21368  | 0.00745  | 0.00262   | 13.04737 | 3.73259   | 2.25     | 0.64   | 28.44  |
| 29      | 0.2567 8.73685                 | 0.35866 1.45481     | 0.11102 -0.02292    | 0.013       | -79.1498 | 44.05294 | 2.67213  | 0.20412  | 0.04236  | 0.00334   | 15.61493 | 3.88578   | 2.7      | 0.67   | 24.81  |
| 30      | 0.2592 102.2197                | 4.29644 2.34662     | 0.17273 0.03416     | 0.04747     | 90.0425  | 4.31288  | 0.31798  | 0.04871  | 0.00553  | 0.156809  | 9.24862  | 2.71      | 1.6      | 59.04  |        |
| 31      | 0.2669 113.2419                | 1.48034 1.0716      | 0.05851 0.31735     | 0.01755     | 82.75567 | 4.4604   | 1.96773  | 0.10751  | 0.02188  | 0.00201   | 19.53747 | 5.06238   | 3.37     | 0.87   | 25.82  |
| 32      | 0.276 301.0153                 | 6.89789 7.89514     | 0.19114 0.97803     | 0.02907     | 95.80396 | 1.82946  | 14.56772 | 0.35465  | 0.07256  | 0.00534   | 12.70029 | 5.54653   | 2.19     | 0.96   | 43.84  |
| 33      | 0.2839 1145.747                | 19.89205 5.15868    | 0.13017 0.84502     | 0.0719      | 99.13254 | 0.70618  | 9.50008  | 0.24059  | 0.00908  | 0.0037    | 9.97497  | 8.12401   | 1.72     | 1.4    | 81.40  |
| 34      | 0.2941 24.50238                | 0.31032 1.13649     | 0.03645 0.00402     | 0.00796     | 4.46646  | 9.61489  | 2.08698  | 0.06699  | 0.00277  | 0.00127   | 23.39842 | 2.37392   | 4.04     | 0.41   | 10.15  |
| 35      | 0.3092 31.02026                | 0.53937 1.03759     | 0.04792 0.05099     | 0.00694     | 48.3394  | 6.56588  | 1.90524  | 0.08805  | 0.00233  | 0.00091   | 16.02166 | 2.05638   | 2.77     | 0.35   | 12.64  |
| 36      | 0.3146 80.04374                | 1.1787 4.11928      | 0.10598 0.24529     | 0.01563     | 90.16363 | 5.62542  | 7.58037  | 0.1956   | 0.04706  | 0.00291   | 7.89345  | 4.51648   | 1.36     | 0.78   | 57.35  |
| 37      | 0.3202 532.0438                | 13.53468 7.90537    | 0.24333 1.6905      | 0.05144     | 93.77377 | 1.5711   | 14.58671 | 0.4515   | 0.07676  | 0.00323   | 33.31042 | 8.44989   | 5.75     | 1.46   | 25.39  |
| 38      | 0.3279 69.46782                | 1.4316 5.21297      | 0.13243 0.19312     | 0.01365     | 81.56447 | 5.56305  | 9.60042  | 0.24479  | 0.02969  | 0.00281   | 12.84861 | 3.88717   | 2.22     | 0.67   | 30.18  |
| 39      | 0.3315 186.9973                | 3.07739 5.10926     | 0.18143 0.6072      | 0.03464     | 95.74243 | 5.24969  | 9.40873  | 0.33532  | 0.03973  | 0.00346   | 7.98911  | 9.85224   | 1.38     | 1.7    | 123.19 |
| 40      | 0.3422 356.7637                | 4.76953 4.31487     | 0.09412 1.12764     | 0.02824     | 93.30852 | 1.98335  | 7.9414   | 0.17375  | 0.04545  | 0.00238   | 23.94375 | 7.10555   | 4.13     | 1.22   | 29.54  |
| 41      | 0.3443 51.57326                | 2.28428 11.77758    | 0.58746 0.14461     | 0.02376     | 81.01927 | 13.1562  | 21.79149 | 1.09607  | 0.03024  | 0.00752   | 9.86545  | 6.85706   | 1.7      | 1.18   | 69.41  |
| 42      | 0.3465 35.3624                 | 1.73256 3.30261     | 0.27986 0.08342     | 0.02961     | 68.99739 | 24.55581 | 6.074    | 0.51592  | 0.03171  | 0.00959   | 10.97969 | 8.71735   | 1.9      | 1.5    | 78.95  |
| 43      | 0.3572 124.4959                | 1.99884 3.03169     | 0.0916 0.38324      | 0.01048     | 90.78564 | 2.02264  | 5.57468  | 0.1688   | 0.0233   | 0.0023    | 11.49338 | 2.53065   | 1.98     | 0.44   | 22.22  |
| 44      | 0.3785 16.17665                | 0.09492 0.74406     | 0.03272 0.00042     | 0.00408     | 0.39766  | 7.47531  | 1.36597  | 0.0601   | 0.00395  | 0.00094   | 16.09121 | 1.21139   | 2.78     | 0.21   | 7.55   |
| 45      | 0.3962 34.23268                | 0.33608 0.99978     | 0.03145 0.00582     | 0.00497     | 4.78818  | 4.28949  | 1.83576  | 0.05778  | 0.00058  | 0.00097   | 32.58831 | 1.50297   | 5.62     | 0.26   | 4.63   |
| 46      | 0.4079 10.86283                | 0.17573 1.36164     | 0.044 0.00209       | 0.00479     | 4.67833  | 13.06866 | 2.50083  | 0.08089  | 0.02794  | 0.00152   | 10.33629 | 1.42722   | 1.78     | 0.25   | 14.04  |
| 47      | 0.4219 12.4938                 | 0.11623 2.55837     | 0.07603 0.00806     | 0.00518     | 17.42326 | 12.28807 | 4.70275  | 0.14     | 0.03436  | 0.00148   | 10.31112 | 1.53796   | 1.78     | 0.27   | 15.17  |
| 48      | 0.4288 40.58422                | 0.59751 1.16438     | 0.10119 0.08232     | 0.00932     | 59.74772 | 7.6421   | 2.13824  | 0.18598  | 0.03622  | 0.00324   | 16.33756 | 2.74799   | 2.82     | 0.47   | 16.67  |
| 49      | 0.4362 48.33855                | 0.78336 2.71346     | 0.08661 0.11259     | 0.01165     | 68.40522 | 7.04281  | 4.98839  | 0.15952  | 0.02964  | 0.00234   | 15.2924  | 3.41902   | 2.64     | 0.59   | 22.35  |
| 50      | 0.4461 10.19436                | 0.16486 1.29752     | 0.06377 0.00921     | 0.00614     | 25.7352  | 17.83257 | 3.28295  | 0.11722  | 0.04669  | 0.00185   | 7.55571  | 1.81912   | 1.3      | 0.31   | 23.85  |
| 51      | 0.4561 28.43921                | 0.38327 0.48479     | 0.06228 0.00513     | 0.00766     | 5.1999   | 7.96917  | 0.88982  | 0.11436  | 0.00947  | 0.00144   | 26.94148 | 2.30289   | 4.65     | 0.4    | 8.60   |
| 52      | 0.4924 49.46668                | 0.46313 0.34318     | 0.01597 0.02307     | 0.00229     | 13.73366 | 1.36164  | 0.62984  | 0.02931  | 0.00384  | 0.0005    | 42.65782 | 0.78386   | 7.36     | 0.13   | 1.77   |
| 53      | 0.4945 729.4496                | 32.07065 2.94875    | 0.2761 0.8454       | 0.0624      | 34.21504 | 2.03165  | 5.42184  | 0.50872  | 0.03779  | 0.00729   | 480.85   | 25.8829   | 81.22    | 4.27   | 5.26   |
| 54      | 0.4955 388.1881                | 23.75105 13.65709   | 1.06423 1.17933     | 0.10848     | 89.49059 | 6.1722   | 20.32092 | 1.99093  | 0.05978  | 0.01485   | 41.49514 | 24.32762  | 7.1      | 4.19   | 59.01  |
| 55      | 0.4969 75.10593                | 3.22483 11.86346    | 0.65159 0.1261      | 0.05081     | 48.3321  | 19.88919 | 21.95173 | 1.21586  | 0.01949  | 0.01127   | 39.11818 | 15.15531  | 6.75     | 2.61   | 38.67  |
| 56      | 0.5034 15.13755                | 0.20613 1.68552     | 0.10281 0.02777     | 0.02035     | 53.40569 | 39.79592 | 3.09639  | 0.18908  | 0.02124  | 0.00319   | 7.04781  | 8.02062   | 1.22     | 1.04   | 85.25  |
| 57      | 0.5101 15.50027                | 0.22124 1.86437     | 0.11513 0.01825     | 0.01476     | 33.8594  | 28.19242 | 3.42537  | 0.21181  | 0.00934  | 0.00327   | 10.24584 | 4.37026   | 1.77     | 0.75   | 42.37  |
| 58      | 0.5279 9.15143                 | 0.09621 1.41282     | 0.04316 0.00292     | 0.00615     | 8.17141  | 19.90683 | 2.59493  | 0.07935  | 0.02951  | 0.00121</ |          |           |          |        |        |

|     |        |          |          |          |         |          |         |          |          |          |         |         |         |          |          |        |      |         |
|-----|--------|----------|----------|----------|---------|----------|---------|----------|----------|----------|---------|---------|---------|----------|----------|--------|------|---------|
| 84  | 0.7062 | 8.80107  | 0.18758  | 1.17421  | 0.06751 | 0.01064  | 0.01158 | 34.72795 | 38.99774 | 2.1563   | 0.12407 | 0.0453  | 0.00233 | 5.73002  | 3.42626  | 0.99   | 0.59 | 59.60   |
| 85  | 0.7125 | 16.20238 | 0.37853  | 2.37546  | 0.12123 | 0.02897  | 0.01375 | 51.7211  | 25.11067 | 4.36596  | 0.2232  | 0.00797 | 0.00196 | 7.82113  | 4.0739   | 1.35   | 0.7  | 51.85   |
| 86  | 0.7142 | 89.0315  | 4.21042  | 5.00758  | 0.41031 | 0.32615  | 0.05045 | 107.824  | 15.96631 | 9.22083  | 0.75822 | 0.02249 | 0.00804 | -6.98821 | 14.26342 | -1.21  | 2.47 | -204.13 |
| 87  | 0.716  | 104.1779 | 7.28059  | 4.21439  | 0.38844 | 0.33444  | 0.04339 | 94.55596 | 10.39295 | 7.75592  | 0.717   | 0.03    | 0.01031 | 5.6868   | 10.86504 | 0.98   | 1.88 | 191.84  |
| 88  | 0.7167 | 67.05451 | 5.47564  | 4.40565  | 0.69504 | 0.25547  | 0.15313 | 112.0915 | 66.92142 | 8.10899  | 1.28328 | 0.04966 | 0.02243 | -8.1296  | 44.99626 | -1.41  | 7.78 | -551.77 |
| 89  | 0.7177 | 154.5265 | 11.9675  | 8.08662  | 0.83058 | 0.43154  | 0.15551 | 82.10723 | 29.06026 | 14.92307 | 1.54156 | 0.04922 | 0.01551 | 27.80256 | 45.2107  | 4.8    | 7.79 | 162.29  |
| 90  | 0.7203 | 40.89404 | 1.17816  | 0.33819  | 0.22626 | 0.09913  | 0.05788 | 71.06834 | 41.81328 | 5.58665  | 0.41694 | 0.03773 | 0.00928 | 11.84817 | 17.12805 | 2.05   | 2.96 | 144.39  |
| 91  | 0.7221 | 72.3906  | 2.34977  | 10.02468 | 0.46304 | 0.2069   | 0.07452 | 83.34757 | 30.32124 | 18.52506 | 0.86178 | 0.03822 | 0.00903 | 12.1358  | 22.10302 | 2.1    | 3.81 | 181.43  |
| 92  | 0.7293 | 9.87385  | 0.16411  | 1.25249  | 0.08411 | -0.00143 | 0.01827 | -5.34162 | 54.83037 | 2.30018  | 0.1546  | 0.02674 | 0.00252 | 10.3792  | 5.40511  | 1.79   | 0.93 | 51.96   |
| 93  | 0.732  | 235.6918 | 8.07688  | 5.03284  | 0.30651 | 0.76182  | 0.05681 | 95.34979 | 6.33279  | 9.2675   | 0.56642 | 0.01036 | 0.00688 | 10.99788 | 14.98279 | 1.9    | 2.59 | 136.32  |
| 94  | 0.7419 | 8.90138  | 0.10975  | 0.95809  | 0.0543  | 0.00665  | 0.01508 | 21.27018 | 50.2239  | 1.75915  | 0.09976 | 0.04082 | 0.00184 | 6.9894   | 4.45983  | 1.21   | 0.77 | 63.64   |
| 95  | 0.7448 | 240.4139 | 8.56971  | 4.9067   | 0.2419  | 0.78976  | 0.05854 | 96.91579 | 6.31323  | 9.03442  | 0.44694 | 0.05474 | 0.00671 | 7.43974  | 15.23147 | 1.28   | 2.63 | 205.47  |
| 96  | 0.7537 | 9.06486  | 0.2148   | 1.01028  | 0.10139 | 0.00647  | 0.01753 | 20.25034 | 57.31638 | 1.85506  | 0.1863  | 0.03885 | 0.00227 | 7.21067  | 5.18531  | 1.25   | 0.9  | 72.00   |
| 97  | 0.7594 | 8.55353  | 0.28434  | 1.29005  | 0.09443 | -0.00736 | 0.00852 | -26.7692 | 29.52583 | 2.36921  | 0.17358 | 0.05106 | 0.00303 | 10.81548 | 2.54229  | 1.87   | 0.44 | 23.53   |
| 98  | 0.762  | 274.1371 | 7.50893  | 4.77725  | 0.24071 | 0.86881  | 0.03069 | 93.51792 | 2.10964  | 8.79527  | 0.44466 | 0.05984 | 0.00631 | 17.82801 | 5.82684  | 3.08   | 1.01 | 32.79   |
| 99  | 0.7642 | 73.65384 | 3.43265  | 10.92558 | 0.5755  | 0.18946  | 0.02367 | 74.81743 | 8.82925  | 20.20282 | 1.07245 | 0.043   | 0.00751 | 18.68468 | 6.61379  | 3.23   | 1.14 | 35.29   |
| 100 | 0.7649 | 120.3791 | 10.52831 | 7.88836  | 0.90229 | 0.29163  | 0.11582 | 71.06534 | 27.75648 | 14.55514 | 1.67418 | 0.0312  | 0.01804 | 35.01782 | 33.74144 | 6.04   | 5.81 | 96.19   |
| 101 | 0.7662 | 270.0145 | 10.00256 | 8.06037  | 0.57305 | 0.81517  | 0.06842 | 88.97482 | 6.72794  | 14.87433 | 1.06354 | 0.0539  | 0.00917 | 29.93674 | 18.30539 | 5.16   | 3.15 | 61.05   |
| 102 | 0.7681 | 98.94401 | 4.42037  | 8.62881  | 0.53405 | 0.2811   | 0.03377 | 83.25638 | 9.38673  | 15.92976 | 0.99196 | 0.05686 | 0.00871 | 16.66341 | 9.37606  | 2.88   | 1.62 | 56.25   |
| 103 | 0.7853 | 401.9403 | 5.62941  | 2.04449  | 0.05434 | 1.26387  | 0.02677 | 92.88271 | 1.48306  | 3.75679  | 0.09999 | 0.0085  | 0.00126 | 28.6465  | 5.9846   | 4.94   | 1.03 | 20.85   |
| 104 | 0.7883 | 138.3733 | 6.06422  | 1.80823  | 0.18388 | 0.43308  | 0.03277 | 92.39824 | 5.7182   | 3.3221   | 0.33826 | 0.0452  | 0.00553 | 10.53    | 7.93594  | 1.82   | 1.37 | 75.27   |
| 105 | 0.7934 | 107.9819 | 2.703    | 4.79459  | 0.15948 | 0.35097  | 0.02159 | 95.70485 | 5.40072  | 8.8273   | 0.29461 | 0.02135 | 0.00338 | 4.65247  | 5.85131  | 0.8    | 1.01 | 126.25  |
| 106 | 0.8034 | 9.41398  | 0.17382  | 1.25543  | 0.06973 | -0.00348 | 0.00785 | -12.053  | 24.71377 | 2.30559  | 0.12816 | 0.0228  | 0.00158 | 10.52473 | 2.32926  | 1.82   | 0.4  | 21.98   |
| 107 | 0.8105 | 21.20182 | 0.44232  | 1.72284  | 0.0829  | 0.01081  | 0.01036 | 14.41592 | 14.45351 | 3.16503  | 0.15248 | 0.01175 | 0.00216 | 18.14207 | 3.08768  | 3.13   | 0.53 | 16.93   |
| 108 | 0.813  | 341.1508 | 13.75425 | 1.77707  | 0.24019 | 1.10756  | 0.06915 | 95.90078 | 4.57711  | 3.26478  | 0.44182 | 0.01518 | 0.00834 | 14.0009  | 15.64395 | 2.42   | 2.7  | 111.57  |
| 109 | 0.8187 | 8.8502   | 0.21091  | 1.14065  | 0.10946 | -0.00446 | 0.01537 | -16.023  | 51.50594 | 2.09462  | 0.20117 | 0.03927 | 0.00267 | 10.2421  | 4.55271  | 1.77   | 0.79 | 44.63   |
| 110 | 0.8206 | 196.3226 | 10.9164  | 4.17524  | 0.39952 | 0.54654  | 0.07982 | 82.10069 | 11.11372 | 7.68365  | 0.73741 | 0.0462  | 0.01152 | 35.23901 | 21.96899 | 6.08   | 3.78 | 62.17   |
| 111 | 0.8306 | 335.0402 | 5.86942  | 0.59358  | 0.05599 | 0.14885  | 0.01111 | 13.11478 | 0.95285  | 1.08959  | 0.10282 | 0.00624 | 0.00223 | 291.1967 | 6.02185  | 49.62  | 1.01 | 2.04    |
| 112 | 0.8779 | 117.2604 | 0.73404  | 0.66879  | 0.02259 | 0.36165  | 0.00613 | 91.11413 | 1.44281  | 1.22771  | 0.04149 | 0.00577 | 0.00059 | 10.42188 | 1.69414  | 1.8    | 0.29 | 16.11   |
| 113 | 0.9062 | 922.9186 | 7.42226  | 0.01282  | 0.01672 | 0.3431   | 0.00568 | 10.98553 | 0.15928  | 0.02351  | 0.03068 | 0.00362 | 0.00063 | 821.5121 | 6.77273  | 136.62 | 1.08 | 0.79    |
| 114 | 0.9099 | 17.01172 | 0.61929  | 2.09207  | 0.1509  | 0.03972  | 0.02259 | 68.09438 | 39.24083 | 3.84435  | 0.2777  | 0.04359 | 0.00449 | 5.42625  | 6.67792  | 0.94   | 1.15 | 122.34  |
| 115 | 0.911  | 33.73288 | 2.13996  | 11.66185 | 0.80466 | 0.09767  | 0.05341 | 82.78278 | 46.54953 | 21.57559 | 1.50107 | 0.03441 | 0.01061 | 5.85098  | 15.82639 | 1.01   | 2.73 | 270.30  |
| 116 | 0.9151 | 145.7407 | 3.33274  | 0.70308  | 0.13004 | 0.37781  | 0.02533 | 76.57938 | 4.83781  | 1.2907   | 0.23884 | 0.00772 | 0.00439 | 34.14336 | 7.10035  | 5.89   | 1.22 | 20.71   |
| 117 | 0.9171 | 60.97546 | 2.53659  | 1.0117   | 0.21598 | 0.16107  | 0.03296 | 77.95998 | 15.6633  | 1.85766  | 0.39686 | 0.04112 | 0.00721 | 13.44207 | 9.5725   | 2.32   | 1.65 | 71.12   |
| 118 | 0.9348 | 28.78829 | 0.21381  | 2.14457  | 0.04412 | 0.06369  | 0.00537 | 64.82523 | 5.50225  | 3.94096  | 0.08119 | 0.00849 | 0.00079 | 10.13113 | 1.58736  | 1.75   | 0.27 | 15.43   |
| 119 | 0.9593 | 134.8719 | 1.10713  | 0.42594  | 0.02048 | 0.03021  | 0.02068 | 6.59389  | 0.58449  | 0.78178  | 0.0376  | 0.00242 | 0.00054 | 125.9888 | 1.30177  | 21.64  | 0.22 | 1.02    |
| 120 | 0.9738 | 963.5302 | 7.46672  | 0.01133  | 0.02737 | 0.05385  | 0.00521 | 1.65141  | 0.15915  | 0.02078  | 0.05022 | 0.00101 | 0.00084 | 947.5968 | 7.50263  | 156.71 | 1.19 | 0.76    |
| 121 | 1      | 28.70319 | 0.21862  | 0.83337  | 0.02463 | 0.03639  | 0.00391 | 37.25775 | 4.01507  | 1.53002  | 0.04525 | 0.03002 | 0.00088 | 18.001   | 1.16028  | 3.11   | 0.2  | 6.43    |

|            |          |         |         |         |         |        |          |         |         |         |        |        |          |         |       |      |      |
|------------|----------|---------|---------|---------|---------|--------|----------|---------|---------|---------|--------|--------|----------|---------|-------|------|------|
| Integrated | 151.1563 | 0.23174 | 2.20337 | 0.00741 | 0.26898 | 0.0013 | 52.47407 | 0.24211 | 4.04919 | 0.01363 | 0.0245 | 0.0002 | 71.93629 | 0.38333 | 12.39 | 0.09 | 0.73 |
|------------|----------|---------|---------|---------|---------|--------|----------|---------|---------|---------|--------|--------|----------|---------|-------|------|------|

# JACKSINA CREEK

Weighted average of f from standards = 1.347e-04 2.749e-06

| Grain # | Cumulativ<br>39Ar | 40Ar/39Ar<br>meas. | 37Ar/39Ar<br>meas. | 36Ar/39Ar<br>meas. | % Atm.<br>40Ar | Ca/K     | Cl/K    | 40*/39K  | Age<br>(Ma) | (Ma)     | %error  |          |         |          |          |       |      |         |
|---------|-------------------|--------------------|--------------------|--------------------|----------------|----------|---------|----------|-------------|----------|---------|----------|---------|----------|----------|-------|------|---------|
| 1       | 0.0024            | 14.95225           | 0.40917            | 1.63294            | 0.12941        | 0.04247  | 0.0133  | 83.19015 | 26.24235    | 2.99968  | 0.238   | 0.03409  | 0.00217 | 2.51136  | 3.92145  | 0.61  | 0.95 | 155.74  |
| 2       | 0.0084            | 29.04315           | 0.42985            | 1.03864            | 0.04879        | 0.05992  | 0.00651 | 60.73114 | 6.56879     | 1.90716  | 0.08965 | 0.0078   | 0.00079 | 11.40162 | 1.91547  | 2.77  | 0.46 | 16.61   |
| 3       | 0.0169            | 31.52785           | 0.37435            | 1.56692            | 0.03883        | 0.06704  | 0.00323 | 62.48739 | 2.94719     | 2.87828  | 0.07141 | 0.01248  | 0.0008  | 11.82888 | 0.94114  | 2.87  | 0.23 | 8.01    |
| 4       | 0.0257            | 6.83684            | 0.05915            | 0.78216            | 0.03607        | 0.0131   | 0.0046  | 55.90899 | 19.94456    | 1.43595  | 0.06625 | 0.01235  | 0.00074 | 3.003    | 1.35883  | 0.73  | 0.33 | 45.21   |
| 5       | 0.0347            | 81.91543           | 1.04684            | 0.95776            | 0.03787        | 0.26103  | 0.00783 | 94.09985 | 2.57728     | 1.75855  | 0.06958 | 0.012    | 0.00101 | 4.83466  | 2.11375  | 1.17  | 0.51 | 43.59   |
| 6       | 0.0452            | 106.6677           | 0.74276            | 1.67029            | 0.04471        | 0.35346  | 0.00498 | 97.81702 | 1.2263      | 3.06838  | 0.08223 | 0.01889  | 0.00092 | 2.33063  | 1.31     | 0.57  | 0.32 | 56.14   |
| 7       | 0.0598            | 9.27202            | 0.0929             | 0.36054            | 0.02527        | 0.00626  | 0.0018  | 19.70143 | 5.76696     | 0.6617   | 0.04639 | 0.00286  | 0.0006  | 7.42335  | 0.53857  | 1.8   | 0.13 | 7.22    |
| 8       | 0.0779            | 13.77921           | 0.14369            | 1.15638            | 0.0283         | 0.03115  | 0.00825 | 66.24332 | 17.72952    | 2.12353  | 0.05201 | 0.034    | 0.00078 | 4.64518  | 2.44035  | 1.13  | 0.59 | 52.21   |
| 9       | 0.0793            | 380.8561           | 16.4019            | 1.16633            | 0.32738        | 1.31097  | 0.06087 | 101.6986 | 1.78416     | 2.14182  | 0.60169 | 0.01071  | 0.00647 | -6.47397 | 6.80476  | -1.57 | 1.65 | -105.10 |
| 10      | 0.0885            | 32.49261           | 0.3629             | 1.04845            | 0.04361        | 0.06251  | 0.00418 | 56.63767 | 3.76583     | 1.92518  | 0.08013 | 0.00507  | 0.00084 | 14.08711 | 1.23595  | 3.42  | 0.3  | 8.77    |
| 11      | 0.1138            | 18.87109           | 0.10294            | 1.08871            | 0.0197         | 0.02283  | 0.00116 | 35.71723 | 1.81002     | 0.3463   | 0.03615 | 0.01382  | 0.00041 | 12.11338 | 3.34889  | 2.94  | 0.08 | 2.72    |
| 12      | 0.122             | 15.35477           | 0.24744            | 1.53633            | 0.05679        | 0.03869  | 0.00416 | 73.78231 | 7.93703     | 2.82202  | 0.10443 | 0.00756  | 0.00103 | 4.02225  | 1.21991  | 0.98  | 0.3  | 30.61   |
| 13      | 0.1244            | 64.26682           | 1.94876            | 2.59386            | 0.23928        | 0.22259  | 0.02076 | 101.7168 | 9.04038     | 7.94995  | 0.44234 | 0.02359  | 0.00385 | -1.10697 | 5.82912  | -0.27 | 1.42 | -525.93 |
| 14      | 0.1334            | 240.3253           | 1.98792            | 1.92746            | 0.05219        | 0.78474  | 0.01051 | 96.43578 | 1.05303     | 3.54144  | 0.09603 | 0.05022  | 0.00158 | 8.57634  | 2.53807  | 2.08  | 0.62 | 29.81   |
| 15      | 0.1342            | 715.3021           | 49.90712           | 13.82464           | 1.08196        | 1.05682  | 0.09005 | 43.50114 | 2.13938     | 25.61642 | 2.02459 | -0.00039 | 0.01054 | 408.1053 | 32.66196 | 96.44 | 7.52 | 7.80    |
| 16      | 0.1463            | 42.79073           | 0.28516            | 0.32548            | 0.02657        | 0.13241  | 0.00401 | 91.43892 | 2.71638     | 0.59374  | 0.04877 | 0.00385  | 0.00067 | 3.66165  | 1.16273  | 0.89  | 0.28 | 31.46   |
| 17      | 0.1591            | 100.9346           | 1.20492            | 0.96541            | 0.04204        | 0.33405  | 0.00669 | 97.74654 | 1.59565     | 1.7726   | 0.07724 | 0.02851  | 0.00136 | 2.2754   | 1.61193  | 0.55  | 0.39 | 70.91   |
| 18      | 0.1715            | 25.88956           | 0.28492            | 0.84498            | 0.04271        | 0.08205  | 0.00432 | 93.49045 | 4.28588     | 1.55134  | 0.07846 | 0.00137  | 0.00085 | 1.68437  | 1.24962  | 0.41  | 0.3  | 73.17   |
| 19      | 0.181             | 26.26302           | 0.31073            | 0.64021            | 0.04494        | 0.07039  | 0.00579 | 79.08528 | 8.64584     | 1.17523  | 0.08253 | 0.00327  | 0.00083 | 5.48911  | 1.69881  | 1.33  | 0.41 | 30.83   |
| 20      | 0.1884            | 13.94665           | 0.1548             | 0.95106            | 0.05951        | 0.01236  | 0.00619 | 25.68444 | 13.13155    | 1.74623  | 0.10934 | 0.0234   | 0.00126 | 10.34943 | 1.83274  | 2.51  | 0.44 | 17.53   |
| 21      | 0.1972            | 7.288              | 0.10188            | 0.75157            | 0.04821        | 0.01534  | 0.00504 | 61.60244 | 20.50699    | 1.37975  | 0.08855 | 0.02955  | 0.00125 | 2.78849  | 1.49015  | 0.68  | 0.36 | 52.94   |
| 22      | 0.2005            | 96.89012           | 2.21925            | 1.86091            | 0.1246         | 0.29462  | 0.01794 | 89.72361 | 5.08745     | 3.41901  | 0.22923 | 0.02954  | 0.00224 | 9.96685  | 4.94118  | 2.42  | 1.2  | 49.59   |
| 23      | 0.2212            | 11.41326           | 0.06383            | 0.1757             | 0.01732        | -0.00018 | 0.00257 | -0.58653 | 6.66033     | 0.32243  | 0.0318  | 0.00191  | 0.00039 | 11.45175 | 0.76099  | 2.78  | 0.18 | 6.47    |
| 24      | 0.2286            | 11.85338           | 0.15129            | 1.52278            | 0.05747        | 0.02759  | 0.00616 | 67.84984 | 15.38985    | 2.7971   | 0.10568 | 0.02272  | 0.00123 | 3.80127  | 1.82268  | 0.92  | 0.44 | 47.83   |
| 25      | 0.242             | 36.87553           | 0.22978            | 0.703              | 0.03641        | 0.11208  | 0.00434 | 89.73113 | 3.44365     | 1.29055  | 0.06687 | 0.01534  | 0.00058 | 3.78553  | 1.2701   | 0.92  | 0.31 | 33.70   |
| 26      | 0.2504            | 9.27852            | 0.10541            | 1.20095            | 0.06263        | 0.01678  | 0.0046  | 52.53671 | 14.67936    | 2.20544  | 0.1151  | 0.0055   | 0.00103 | 4.39353  | 1.36024  | 1.07  | 0.33 | 30.84   |
| 27      | 0.2597            | 27.04489           | 0.19477            | 0.80802            | 0.0526         | 0.04826  | 0.00439 | 52.52723 | 4.78438     | 1.55694  | 0.09664 | 0.0016   | 0.00088 | 12.83255 | 1.29726  | 3.11  | 0.31 | 9.97    |
| 28      | 0.267             | 51.79864           | 0.5496             | 0.68771            | 0.06098        | 0.09526  | 0.00616 | 54.26619 | 3.47372     | 1.26247  | 0.112   | 0.00485  | 0.00094 | 23.68742 | 1.81828  | 5.74  | 0.44 | 7.67    |
| 29      | 0.2708            | 32.36869           | 0.53113            | 2.55897            | 0.1443         | 0.07942  | 0.0093  | 71.91562 | 8.43085     | 4.70385  | 0.26572 | 0.01489  | 0.00257 | 9.09866  | 2.73708  | 2.21  | 0.66 | 29.86   |
| 30      | 0.2857            | 37.91116           | 0.33668            | 0.63216            | 0.02923        | 0.11781  | 0.00316 | 91.76214 | 2.37292     | 1.16044  | 0.05369 | 0.01888  | 0.00084 | 3.12202  | 0.90124  | 0.76  | 0.22 | 28.95   |
| 31      | 0.2951            | 30.9937            | 0.35065            | 0.62915            | 0.05542        | 0.08424  | 0.00458 | 80.22628 | 4.28792     | 1.15491  | 0.10178 | 0.0267   | 0.0014  | 6.12546  | 1.33118  | -0.49 | 0.32 | 21.48   |
| 32      | 0.3079            | 117.3762           | 1.32603            | 0.96686            | 0.03871        | 0.39874  | 0.00526 | 100.1149 | 0.75388     | 1.77527  | 0.07113 | 0.01185  | 0.00088 | -0.13493 | 0.88518  | -1.03 | 0.21 | -700.00 |
| 33      | 0.309             | 150.2996           | 13.97536           | 0.14985            | 0.4225         | 0.42709  | 0.05491 | 83.97801 | 7.46766     | 0.27498  | 0.7754  | -0.00694 | 0.00913 | 24.07878 | 11.44796 | 5.84  | 2.77 | 47.43   |
| 34      | 0.3238            | 39.54675           | 0.54746            | 1.01257            | 0.03324        | 0.1195   | 0.00352 | 89.14618 | 2.3795      | 1.85925  | 0.06107 | 0.00866  | 0.00066 | 4.29218  | 0.94565  | 0.10  | 0.23 | 22.12   |
| 35      | 0.3246            | 92.68522           | 11.41493           | 8.77517            | 1.20698        | 0.2968   | 0.064   | 93.87539 | 16.77912    | 16.20163 | 2.24235 | 0.00484  | 0.0101  | 5.71019  | 15.66143 | 1.39  | 3.8  | 273.38  |
| 36      | 0.3269            | 129.9511           | 5.68414            | 4.20427            | 0.27547        | 0.41193  | 0.02366 | 93.42404 | 3.50646     | 7.73723  | 0.50847 | 0.00039  | 0.00363 | 8.56903  | 4.58658  | 2.08  | 1.11 | 53.37   |
| 37      | 0.3304            | 22.08184           | 0.50934            | 1.67225            | 0.11794        | 0.0484   | 0.00743 | 64.23323 | 9.84634     | 3.07197  | 0.21692 | 0.00099  | 0.00253 | 7.89666  | 2.18254  | 1.92  | 0.53 | 27.60   |
| 38      | 0.3424            | 4.60756            | 0.04351            | 0.52115            | 0.07196        | -0.00573 | 0.00254 | -37.8998 | 16.42536    | 0.95659  | 0.13214 | 0.02189  | 0.00086 | 6.3152   | 0.75422  | 1.53  | 0.18 | 11.76   |
| 39      | 0.3428            | 79.79819           | 16.28313           | 5.88202            | 1.58835        | 0.20407  | 0.10946 | 74.98846 | 37.51927    | 10.83772 | 2.93878 | 0.04503  | 0.02019 | 20.03458 | 30.33947 | 4.86  | 7.34 | 151.03  |
| 40      | 0.348             | 134.483            | 1.97641            | 1.32922            | 0.10376        | 0.1804   | 0.00756 | 39.57229 | 1.56462     | 2.27579  | 1.19072 | 0.08676  | 0.0026  | 81.38126 | 2.43563  | 19.63 | 0.58 | 2.95    |
| 41      | 0.3619            | 21.85008           | 0.18929            | 0.25982            | 0.02608        | 0.03679  | 0.00228 | 49.72362 | 3.05787     | 0.47682  | 0.04788 | 0.00304  | 0.00057 | 10.97251 | 0.67548  | 2.66  | 0.16 | 6.02    |
| 42      | 0.3742            | 53.93768           | 0.44976            | 0.48173            | 0.02907        | 0.14538  | 0.00357 | 79.61975 | 1.86644     | 0.8842   | 0.05337 | 0.01289  | 0.00063 | 10.99032 | 1.1043   | 2.67  | 0.25 | 9.36    |
| 43      | 0.3801            | 25.08274           | 0.55271            | 0.89421            | 0.0688         | 0.07162  | 0.0057  | 84.17637 | 6.4681      | 1.64178  | 0.1264  | 0.00543  | 0.00132 | 3.96681  | 1.62435  | 0.96  | 0.39 | 40.63   |
| 44      | 0.3865            | 9.94116            | 0.19364            | 0.26976            | 0.10185        | -0.00149 | 0.00293 | -4.702   | 8.81401     | 0.49507  | 0.18696 | 0.00584  | 0.00136 | 10.27476 | 0.08826  | 2.49  | 0.22 | 8.84    |
| 45      | 0.3943            | 12.93583           | 0.17355            | 1.57807            | 0.05731        | 0.03054  | 0.00407 | 68.92066 | 9.28486     | 2.89877  | 0.10539 | 0.0049   | 0.00158 | 4.01563  | 1.20818  | 0.97  | 0.29 | 29.90   |

|     |        |          |          |         |           |          |         |          |          |          |         |          |         |          |          |       |      |          |
|-----|--------|----------|----------|---------|-----------|----------|---------|----------|----------|----------|---------|----------|---------|----------|----------|-------|------|----------|
| 46  | 0.4144 | 117.9597 | 0.73254  | 0.44817 | 0.01874   | 0.36184  | 0.00558 | 90.6349  | 1.31399  | 0.82259  | 0.03441 | 0.01086  | 0.00056 | 11.04776 | 1.5556   | 2.68  | 0.38 | 14.18    |
| 47  | 0.4186 | 137.2131 | 3.60631  | 1.70221 | 0.09806   | 0.42719  | 0.01482 | 91.91619 | 2.09866  | 3.12708  | 0.18036 | 0.00095  | 0.00225 | 11.103   | 2.89911  | 2.69  | 0.7  | 26.02    |
| 48  | 0.4265 | 19.4479  | 0.26005  | 1.37402 | 0.0576    | 0.03897  | 0.00335 | 58.7206  | 5.04106  | 2.52358  | 0.10589 | 0.00339  | 0.00098 | 8.02351  | 0.98641  | 1.95  | 0.24 | 12.31    |
| 49  | 0.4321 | 44.92169 | 0.93237  | 0.27348 | 0.05225   | 0.10885  | 0.00952 | 71.6002  | 6.09856  | 0.5019   | 0.09591 | 0.00285  | 0.00191 | 12.7517  | 2.75252  | 3.09  | 0.67 | 21.68    |
| 50  | 0.437  | 50.1133  | 0.92192  | 0.15352 | 0.0654    | 0.13041  | 0.01041 | 76.91683 | 5.98129  | 0.28171  | 0.12003 | 0.00291  | 0.00182 | 11.56214 | 3.00442  | 2.8   | 0.73 | 26.07    |
| 51  | 0.4532 | 16.64042 | 0.156    | 0.48489 | 0.026     | 0.01274  | 0.00275 | 22.42496 | 4.88703  | 0.89001  | 0.04774 | 0.00246  | 0.00062 | 12.8902  | 0.82155  | 3.13  | 0.2  | 6.39     |
| 52  | 0.4578 | 4.96821  | 0.14599  | 0.86178 | 0.07881   | -0.00838 | 0.00965 | -51.5881 | 57.72662 | 1.58221  | 0.14479 | 0.00551  | 0.0019  | 7.49078  | 2.85738  | 1.82  | 0.69 | 37.91    |
| 53  | 0.4623 | 208.0631 | 4.21097  | 1.51517 | 0.08671   | 0.70536  | 0.02043 | 100.1324 | 2.1007   | 2.78311  | 0.15943 | 0.03233  | 0.00306 | -0.27565 | 4.37479  | -0.07 | 1.06 | -1514.29 |
| 54  | 0.4698 | 14.29152 | 0.1735   | 1.77442 | 0.04822   | 0.03149  | 0.00571 | 64.2285  | 11.81174 | 3.25989  | 0.0887  | 0.01082  | 0.0011  | 5.10808  | 1.68871  | 1.24  | 0.41 | 33.06    |
| 55  | 0.4709 | 114.7815 | 9.60624  | 3.95122 | 0.50485   | 0.40439  | 0.0543  | 103.852  | 10.9558  | 7.27023  | 0.93153 | -0.00373 | 0.00892 | -4.43255 | 12.61171 | -1.08 | 3.06 | -283.33  |
| 56  | 0.4801 | 154.1981 | 1.64826  | 1.7031  | 0.04999   | 0.51369  | 0.0107  | 98.36985 | 1.78716  | 3.12873  | 0.09195 | 0.01973  | 0.0012  | 2.5162   | 2.75938  | 0.61  | 0.67 | 109.84   |
| 57  | 0.4862 | 33.8651  | 0.61821  | 0.93344 | 0.08553   | 0.10577  | 0.0095  | 92.14695 | 8.13484  | 1.71386  | 0.15715 | 0.03215  | 0.00188 | 2.65887  | 2.75499  | 0.65  | 0.67 | 103.08   |
| 58  | 0.4918 | 82.06505 | 1.57331  | 1.33602 | 0.10314   | 0.27042  | 0.00931 | 97.27504 | 2.80031  | 2.45374  | 0.1896  | 0.02553  | 0.00209 | 2.23755  | 2.30015  | 0.54  | 0.56 | 103.70   |
| 59  | 0.4985 | 117.7322 | 1.87214  | 1.52128 | 0.06972   | 0.40162  | 0.01144 | 100.7229 | 2.40918  | 2.79434  | 0.1282  | 0.01202  | 0.00169 | -0.8518  | 2.83852  | -0.21 | 0.69 | -328.57  |
| 60  | 0.501  | 55.65284 | 1.90798  | 1.73974 | 0.22864   | 0.17461  | 0.02424 | 92.5049  | 12.48994 | 3.1961   | 0.42056 | 0.0186   | 0.00404 | 4.17414  | 6.9579   | 1.01  | 1.69 | 167.33   |
| 61  | 0.5091 | 12.07786 | 0.15751  | 0.27624 | 0.05247   | -0.0048  | 0.00452 | -11.9734 | 11.08743 | 0.50697  | 0.09631 | 0.0026   | 0.00101 | 13.49337 | 1.34737  | 3.27  | 0.33 | 10.09    |
| 62  | 0.5143 | 339.2332 | 5.35722  | 1.79161 | 0.1028    | 1.1116   | 0.02788 | 96.79456 | 1.91452  | 3.29152  | 0.18911 | 0.00047  | 0.00216 | 10.88674 | 6.50771  | 2.64  | 1.58 | 59.85    |
| 63  | 0.519  | 5.32468  | 0.12829  | 0.83722 | 0.08157   | -0.0117  | 0.00678 | -66.6251 | 37.79448 | 1.53709  | 0.14985 | 0.0037   | 0.00204 | 8.82802  | 2.01147  | 2.14  | 0.49 | 22.90    |
| 64  | 0.5208 | 92.75928 | 4.21027  | 2.11055 | 0.29799   | 0.2979   | 0.02763 | 94.74339 | 7.68955  | 3.87835  | 0.54841 | 0.01013  | 0.00483 | 4.88171  | 7.14523  | 1.18  | 1.73 | 146.61   |
| 65  | 0.5268 | 105.4215 | 1.74609  | 0.56723 | 0.07602   | 0.38088  | 0.01088 | 86.33686 | 2.71713  | 1.04121  | 0.1396  | 0.01793  | 0.0021  | 14.4056  | 2.87853  | 3.49  | 0.7  | 20.06    |
| 66  | 0.5343 | 31.1748  | 0.51774  | 0.81702 | 0.06148   | 0.08796  | 0.00796 | 83.2422  | 7.43268  | 1.49999  | 0.11294 | 0.00786  | 0.00098 | 5.22225  | 2.31832  | 1.27  | 0.56 | 44.09    |
| 67  | 0.5381 | 605.7379 | 16.16105 | 0.96317 | 0.13187   | 2.05799  | 0.05807 | 100.3877 | 0.96333  | 1.76849  | 0.2423  | 0.01975  | 0.00299 | -2.35019 | 5.83834  | -0.57 | 1.42 | -249.12  |
| 68  | 0.5434 | 66.81111 | 1.23729  | 1.40328 | 0.0811    | 0.20734  | 0.008   | 91.57144 | 3.11367  | 2.57738  | 0.14911 | 0.00728  | 0.00189 | 5.6343   | 2.08471  | 1.37  | 0.51 | 37.23    |
| 69  | 0.5523 | 113.6709 | 1.45062  | 1.13738 | 0.05216   | 0.35552  | 0.01082 | 92.43542 | 2.56546  | 0.25211  | 0.09572 | -0.00032 | 0.00184 | 8.59732  | 2.91875  | 2.09  | 0.71 | 33.97    |
| 70  | 0.5569 | 11.70648 | 0.28128  | 1.64081 | 0.00258   | 0.00258  | 0.00923 | 5.36171  | 23.35674 | 3.01416  | 0.22508 | 0.02069  | 0.00229 | 11.06356 | 2.74378  | 2.68  | 0.67 | 25.00    |
| 71  | 0.567  | 4.83432  | 0.06582  | 1.18539 | 0.04476   | 0.00138  | 0.00359 | 6.46685  | 22.09033 | 2.17685  | 0.08227 | 0.00378  | 0.0012  | 4.4977   | 1.06413  | 1.09  | 0.26 | 23.85    |
| 72  | 0.5709 | 11.90899 | 0.29763  | 0.95449 | 0.13046   | 0.02205  | 0.00882 | 54.19247 | 21.91574 | 1.75254  | 0.23971 | 0.00338  | 0.00337 | 5.44529  | 2.60976  | 1.32  | 0.63 | 47.73    |
| 73  | 0.5754 | 32.58452 | 0.96046  | 1.37205 | 0.11795   | 0.09652  | 0.00741 | 87.26398 | 6.21462  | 2.51996  | 0.21683 | 0.02369  | 0.00175 | 4.15021  | 2.02917  | 1.01  | 0.49 | 48.51    |
| 74  | 0.5776 | 127.1506 | 4.99805  | 5.54065 | 0.3548    | 0.43917  | 0.02411 | 101.7291 | 3.93707  | 10.20626 | 0.65613 | 0.05174  | 0.00521 | -2.20672 | 5.02478  | -0.54 | 1.22 | -225.93  |
| 75  | 0.5803 | 41.76656 | 1.1176   | 1.3161  | 0.19981   | 0.09131  | 0.00937 | 64.38703 | 6.40839  | 2.4171   | 0.3673  | 0.02048  | 0.00445 | 14.87758 | 2.70819  | 3.61  | 0.66 | 18.28    |
| 76  | 0.5825 | 79.41284 | 3.41582  | 1.27704 | 0.28152   | 0.25139  | 0.01804 | 93.44742 | 5.40038  | 2.34531  | 0.51748 | 0.0268   | 0.00412 | 5.20634  | 4.29823  | 1.26  | 1.04 | 82.54    |
| 77  | 0.5947 | 13.85916 | 0.14821  | 0.24384 | 0.04768   | 0.0143   | 0.00294 | 30.41855 | 6.26868  | 0.44749  | 0.08751 | 0.00431  | 0.00082 | 9.6244   | 0.87373  | 2.33  | 0.21 | 9.01     |
| 78  | 0.5978 | 11.22074 | 0.42085  | 0.73121 | 0.18634   | 0.02083  | 0.0079  | 54.47086 | 20.77866 | 3.14237  | 0.34226 | 0.0049   | 0.0024  | 5.09782  | 2.33623  | 1.24  | 0.57 | 45.97    |
| 79  | 0.6043 | 13.2676  | 0.20406  | 0.91762 | 0.08772   | 0.02214  | 0.00578 | 48.85729 | 12.87266 | 1.6848   | 0.16116 | 0.02538  | 0.00184 | 6.77462  | 1.70882  | 1.64  | 0.41 | 25.00    |
| 80  | 0.6112 | 50.25321 | 0.7281   | 1.22236 | 0.08849   | 0.15896  | 0.00584 | 93.32422 | 3.18943  | 2.24479  | 0.16265 | 0.01823  | 0.0018  | 3.35571  | 1.60511  | 0.81  | 0.39 | 48.15    |
| 81  | 0.6325 | 70.76096 | 0.41592  | 0.38735 | 0.03707   | 0.22801  | 0.00446 | 95.21421 | 1.81773  | 0.71094  | 0.06806 | 0.02256  | 0.00062 | 3.38597  | 1.28761  | 0.82  | 0.31 | 37.80    |
| 82  | 0.6407 | 25.19136 | 0.26305  | 1.07968 | 0.08383   | 0.02951  | 0.00501 | 34.30391 | 5.87084  | 1.98258  | 0.15405 | 0.00916  | 0.00138 | 16.54285 | 1.48901  | 4.01  | 0.36 | 8.98     |
| 83  | 0.6486 | 4.91347  | 0.06838  | 1.74812 | 0.084     | -0.00739 | 0.00624 | -47.6635 | 37.73761 | 3.21152  | 0.15451 | 0.05012  | 0.00164 | 7.22051  | 1.8475   | 1.75  | 0.45 | 25.71    |
| 84  | 0.6751 | 22.06449 | 0.13856  | 0.56668 | 0.02493   | 0.06115  | 0.00187 | 81.79601 | 2.4663   | 1.0402   | 0.04579 | 0.00332  | 0.00052 | 4.01282  | 0.54494  | 0.97  | 0.13 | 13.40    |
| 85  | 0.6872 | 60.34127 | 0.76897  | 0.57156 | 0.03521   | 0.16558  | 0.00575 | 81.05072 | 2.62942  | 1.04915  | 0.06466 | 0.00349  | 0.00123 | 11.43322 | 1.59472  | 2.77  | 0.39 | 14.08    |
| 86  | 0.6939 | 164.3131 | 4.42156  | 1.13872 | 0.073     | 0.54631  | 0.01628 | 98.20795 | 1.33048  | 2.09108  | 0.13416 | 0.02561  | 0.00231 | 2.94641  | 2.19108  | 0.72  | 0.53 | 73.61    |
| 87  | 0.702  | 34.11765 | 0.58906  | 0.88204 | 0.06083   | 0.099    | 0.00769 | 85.6031  | 6.50656  | 1.61943  | 0.11175 | 0.01228  | 0.00169 | 4.91067  | 2.22142  | 1.19  | 0.54 | 45.38    |
| 88  | 0.7155 | 9.5513   | 0.12625  | 0.70112 | 0.02824   | 0.01797  | 0.00344 | 55.15518 | 10.66974 | 1.28709  | 0.05187 | 0.00498  | 0.00105 | 4.27207  | 1.01846  | 1.04  | 0.25 | 24.04    |
| 89  | 0.7272 | 113.212  | 1.57125  | 0.20833 | 0.04025   | 0.35893  | 0.00755 | 93.69454 | 1.50194  | 0.38231  | 0.07387 | 0.03311  | 0.00142 | 7.13772  | 1.7047   | 1.73  | 0.41 | 23.70    |
| 90  | 0.7369 | 26.63652 | 0.44858  | 0.27269 | 0.04297   | 0.05072  | 0.00496 | 56.24779 | 5.43589  | 0.50044  | 0.07888 | 0.00255  | 0.00149 | 11.64332 | 1.46113  | 2.82  | 0.35 | 12.41    |
| 91  | 0.7463 | 13.51173 | 0.18443  | 1.55228 | 0.05083   | 0.00042  | 0.00491 | -0.03753 | 10.76125 | 2.85134  | 0.09347 | 0.03242  | 0.00164 | 13.50192 | 1.46415  | 3.27  | 0.35 | 10.70    |
| 92  | 0.7513 | 76.76122 | 2.07572  | 3.2418  | 0.14028   | 0.22566  | 0.01042 | 86.55476 | 3.28859  | 5.96191  | 0.25857 | 0.01905  | 0.00253 | 10.34042 | 2.54887  | 2.51  | 0.62 | 24.70    |
| 93  | 0.7533 | 31.36299 | 2.74411  | 3.12106 | 0.45216   | 0.05119  | 0.02446 | 47.45239 | 22.68584 | 5.73936  | 0.83333 | 0.00357  | 0.01088 | 16.5013  | 7.27234  | 4     | 1.76 | 44.00    |
| 94  | 0.7593 | 1.15677  | 0.10521  | 1.13512 | 0.07981   | -0.00967 | 0.00676 | -261.876 | 17.85655 | 2.08445  | 0.14667 | 0.00816  | 0.0027  | 4.08194  | 2.00178  | 0.99  | 0.49 | 49.49    |
| 95  | 0.7638 | 24.40331 | 0.61497  | 0.78178 | 0.10887   | 0.04951  | 0.0099  | 59.76436 | 11.92308 | 1.43525  | 0.19997 | 0.02035  | 0.00263 | 9.8123   | 2.92014  | 2.38  | 0.71 | 29.83    |
| 96  | 0.771  | 4.263    | 0.10644  | 1.317   | 0.08987   | -0.01269 | 0.00595 | -91.1639 | 41.49245 | 2.41877  | 0.16521 | 0.00806  | 0.00185 | 8.10013  | 1.76558  | 1.97  | 0.43 | 21.83    |
| 97  | 0.777  | 50.81526 | 0.7951   | 0.95273 | 0.10944   | 0.12965  | 0.01019 | 75.28492 | 5.81081  | 1.74931  | 0.20107 | 0.00665  | 0.00193 | 12.56015 | 2.96006  | 3.05  | 0.72 | 23.61    |
| 98  | 0.7826 | 100.0265 | 1.56893  | 0.83275 | 0.10796   | 0.22358  | 0.01109 | 66.00144 | 3.1165   | 1.52887  | 0.19832 | 0.02535  | 0.00345 | 34.01749 | 3.16789  | 8.24  | 0.77 | 9.34     |
| 99  | 0.7977 | 5.03447  | 0.06659  | 0.59749 | 0.03539   | 0.00087  | 0.00335 | 4.12528  | 19.76572 | 1.09677  | 0.065   | 0.005    | 0.00074 | 4.80035  | 0.99177  | 1.16  | 0.24 | 20.69    |
| 100 | 0.805  | 898.8085 | 11.48535 | 0.61441 | 0.10821   | 3.13617  | 0.04252 | 103.105  | 0.47808  | 1.12785  | 0.19872 | 0.01555  | 0.00205 | -27.9195 | 4.31068  | -6.79 | 1.05 | -15.46   |
| 101 | 0.8154 | 21.20478 | 0.3207   | 0.90231 | 0.06314   | 0.02462  | 0.00508 | 33.99935 | 7.07006  | 1.65667  | 0.116   | 0.00465  | 0.00131 | 13.98462 | 1.51328  | 3.39  | 0.37 | 10.91    |
| 102 | 0.8191 | 34.8154  | 1.1352   | 1.97197 | 0.19229</ |          |         |          |          |          |         |          |         |          |          |       |      |          |

|    |        |          |           |          |          |          |          |          |         |          |          |          |          |          |           |         |          |        |
|----|--------|----------|-----------|----------|----------|----------|----------|----------|---------|----------|----------|----------|----------|----------|-----------|---------|----------|--------|
| 8  | 0.023  | 1033.683 | 10.10334  | 1.921    | 0.04526  | 0.33928  | 0.01588  | 9.68413  | 0.44404 | 3.52955  | 0.08327  | 0.00896  | 0.00094  | 934.8215 | 10.23996  | 154.68  | 1.62     | 1.05   |
| 9  | 0.0239 | 1762.042 | 54.69955  | 5.1605   | 0.39894  | 0.90835  | 0.08086  | 15.20945 | 1.27139 | 9.50344  | 0.73736  | 0.0038   | 0.00727  | 1499.485 | 51.869    | 242.06  | 7.84     | 3.24   |
| 10 | 0.0243 | 1025.506 | 109.75102 | 9.95647  | 1.3144   | 2.82118  | 0.332    | 81.2147  | 3.98791 | 18.39812 | 2.44601  | 0.34362  | 0.04211  | 194.0029 | 46.21026  | 33.21   | 7.84     | 23.61  |
| 11 | 0.0243 | 58384.68 | 100215.72 | 1242.225 | 2132.436 | 155.4112 | 266.7958 | 78.48228 | 2.24809 | 18572.88 | 259794.9 | 7.81315  | 13.90858 | 102369.5 | 1431941.9 | 4290.57 | 22876.39 | 533.18 |
| 12 | 0.0273 | 3246.181 | 94.82257  | 10.31938 | 0.3198   | 7.38347  | 0.22405  | 67.18617 | 0.55299 | 19.07365 | 0.59543  | 0.02525  | 0.00384  | 1073.006 | 36.39077  | 176.46  | 5.7      | 3.23   |
| 13 | 0.0373 | 1870.377 | 22.63674  | 2.97053  | 0.06035  | 0.38122  | 0.0137   | 6.00981  | 0.20375 | 5.46198  | 0.1112   | 0.006    | 0.00108  | 1761.639 | 21.70527  | 281.24  | 3.21     | 1.14   |
| 14 | 0.0375 | 5124.883 | 704.74254 | 143.765  | 19.84784 | 10.79014 | 1.51733  | 61.9849  | 1.83128 | 293.5977 | 45.11371 | 0.12956  | 0.05635  | 2168.372 | 347.96565 | 340.37  | 49.77    | 14.62  |
| 15 | 0.0376 | 2991.065 | 593.94411 | 228.6844 | 45.46666 | 6.95064  | 1.44434  | 68.03861 | 4.21319 | 500.4228 | 118.6563 | 0.11499  | 0.07101  | 1140.105 | 309.08629 | 186.94  | 48.14    | 25.75  |
| 16 | 0.0389 | 1685.7   | 32.21319  | 62.44964 | 1.29214  | 2.24503  | 0.06022  | 39.05025 | 0.74537 | 119.8732 | 2.59473  | 0.01645  | 0.0077   | 1074.815 | 25.25313  | 176.74  | 3.96     | 2.24   |
| 17 | 0.0409 | 1216.493 | 38.60766  | 4.82196  | 0.18967  | 0.65696  | 0.04797  | 15.92613 | 1.04964 | 8.87786  | 0.3504   | 0.01079  | 0.00515  | 1026.223 | 35.10724  | 169.12  | 5.52     | 3.26   |
| 18 | 0.0434 | 738.7927 | 19.68     | 21.35144 | 0.6134   | 0.16374  | 0.02818  | 6.31115  | 1.11349 | 39.77674 | 1.16022  | 1.29828  | 0.03554  | 702.7353 | 20.76299  | 117.5   | 3.36     | 2.86   |
| 19 | 0.0447 | 2297.145 | 88.15559  | 11.5064  | 0.53278  | 3.25164  | 0.16994  | 41.78763 | 1.48462 | 21.28562 | 0.99366  | 0.04301  | 0.00929  | 1348.161 | 62.48664  | 219.06  | 9.56     | 4.36   |
| 20 | 0.0514 | 1766.724 | 13.00856  | 11.6356  | 0.20024  | 3.55383  | 0.04062  | 59.38754 | 0.52018 | 21.52661 | 0.37353  | 0.08197  | 0.00389  | 723.4428 | 10.71648  | 120.85  | 1.73     | 1.43   |
| 21 | 0.061  | 2065.864 | 19.38552  | 0.02907  | 0.01248  | 0.23971  | 0.01199  | 3.42879  | 0.16854 | 0.05334  | 0.0229   | 0.00319  | 0.0013   | 1995.042 | 19.0432   | 315.41  | 2.76     | 0.88   |
| 22 | 0.0661 | 223.1851 | 4.83465   | 1.82496  | 0.06381  | 0.21209  | 0.0297   | 28.01672 | 3.88651 | 3.35288  | 0.11739  | 0.00645  | 0.00256  | 160.8419 | 9.36142   | 27.58   | 1.59     | 5.77   |
| 23 | 0.1155 | 171.0712 | 0.92411   | 0.6831   | 0.00542  | 0.11157  | 0.00279  | 19.24286 | 0.47107 | 1.25399  | 0.00996  | 0.00142  | 0.00024  | 138.1949 | 1.09939   | 23.72   | 0.19     | 0.80   |
| 24 | 0.1157 | 1916.691 | 443.97143 | 197.6612 | 45.79802 | 4.16103  | 1.01718  | 63.30215 | 5.01808 | 421.5218 | 113.5117 | 0.06898  | 0.04015  | 817.4892 | 246.88359 | 135.98  | 39.56    | 29.09  |
| 25 | 0.1163 | 804.9894 | 94.34468  | 24.24057 | 2.87608  | 1.05878  | 0.151    | 38.61961 | 3.16497 | 45.25279 | 5.46264  | 0.98701  | 0.1214   | 502.6934 | 65.34039  | 84.83   | 10.77    | 12.70  |
| 26 | 0.1184 | 859.8395 | 21.25216  | 15.39416 | 0.40439  | 0.22568  | 0.02793  | 7.60873  | 0.94045 | 28.55662 | 0.7584   | 0.02949  | 0.00402  | 803.1207 | 21.67173  | 133.68  | 3.48     | 2.60   |
| 27 | 0.1297 | 1047.377 | 13.98817  | 0.7262   | 0.02671  | 0.009716 | 0.00623  | 2.7355   | 0.172   | 1.33317  | 0.04906  | 0.01038  | 0.00138  | 1019.219 | 13.73841  | 168.01  | 2.16     | 1.29   |
| 28 | 0.1311 | 1728.944 | 63.15718  | 9.32076  | 0.39761  | 0.41561  | 0.04009  | 7.05902  | 0.63427 | 17.21563 | 0.73926  | 0.00562  | 0.00694  | 1617.518 | 60.49996  | 259.81  | 9.05     | 3.48   |
| 29 | 0.1323 | 2073.309 | 84.71962  | 1.26554  | 0.20592  | 1.71563  | 0.08322  | 24.44751 | 0.64071 | 2.32461  | 0.3785   | 0.03978  | 0.006    | 1567.815 | 65.50876  | 252.36  | 9.84     | 3.90   |
| 30 | 0.1329 | 1301.944 | 78.02928  | 7.26764  | 0.60739  | 1.1768   | 0.12443  | 26.6643  | 2.32851 | 13.40391 | 1.12601  | -0.01186 | 0.01368  | 959.694  | 65.38598  | 158.62  | 10.35    | 6.53   |
| 31 | 0.139  | 1506.605 | 23.44927  | 4.68312  | 0.10349  | 0.59538  | 0.02013  | 11.65224 | 0.35058 | 8.62139  | 0.19116  | 0.00481  | 0.00216  | 1335.443 | 21.5184   | 217.11  | 3.3      | 1.52   |
| 32 | 0.1394 | 2229.045 | 217.79658 | 0.40208  | 0.54032  | 2.20967  | 0.25713  | 29.2921  | 1.8532  | 0.37798  | 0.99198  | -0.01239 | 0.02214  | 1576.538 | 159.55922 | 253.67  | 23.95    | 9.44   |
| 33 | 0.14   | 1302.341 | 130.42066 | 18.08238 | 1.91949  | 2.69029  | 0.28878  | 60.92938 | 2.37527 | 33.60786 | 3.61371  | 0.16571  | 0.02638  | 515.4029 | 61.02502  | 86.92   | 10.05    | 11.56  |
| 34 | 0.143  | 1441.429 | 45.81606  | 7.55307  | 0.27512  | 1.82894  | 0.07493  | 37.45168 | 0.97107 | 13.93317 | 0.51023  | 0.00788  | 0.00485  | 906.4062 | 32.22245  | 150.17  | 5.12     | 3.43   |
| 35 | 0.1475 | 2169.172 | 40.7427   | -0.06075 | 0.05322  | 0.36539  | 0.01656  | 4.97792  | 0.20525 | -0.11146 | 0.09765  | 0.00193  | 0.00265  | 2061.076 | 38.96696  | 324.96  | 5.62     | 1.71   |
| 36 | 0.1561 | 2081.913 | 15.51743  | 0.70751  | 0.05041  | 0.22872  | 0.00732  | 3.24368  | 0.10108 | 1.29884  | 0.09259  | 0.00201  | 0.00186  | 2015.361 | 15.17672  | 318.35  | 2.2      | 0.69   |
| 37 | 0.1571 | 1958.97  | 116.74455 | 22.28667 | 1.41472  | 3.58601  | 0.24674  | 58.07296 | 1.36088 | 41.54689 | 2.6795   | 0.52871  | 0.034    | 834.4597 | 57.36525  | 138.7   | 9.18     | 6.62   |
| 38 | 0.1753 | 664.9729 | 5.7742    | 0.63041  | 0.0159   | 0.09842  | 0.00425  | 4.36578  | 0.18497 | 1.15724  | 0.02919  | -0.00042 | 0.00087  | 636.1964 | 5.66261   | 106.7   | 0.92     | 0.86   |
| 39 | 0.1822 | 1587.968 | 19.49949  | 0.17511  | 0.03467  | 0.24807  | 0.01094  | 4.61539  | 0.19548 | 0.32135  | 0.06363  | 0.00193  | 0.00162  | 1514.836 | 18.86186  | 244.38  | 2.85     | 1.17   |
| 40 | 0.1832 | 1332.245 | 83.90713  | 54.58792 | 3.49677  | 2.58648  | 0.1811   | 57.03318 | 1.75658 | 104.1775 | 6.94093  | 0.0135   | 0.0135   | 595.3627 | 45.98342  | 100.04  | 7.52     | 7.52   |
| 41 | 0.1896 | 1690.51  | 18.1327   | 3.62392  | 0.06179  | 0.56449  | 0.01797  | 9.84983  | 0.2957  | 6.66645  | 0.11396  | 0.00426  | 0.0019   | 1527.882 | 17.17931  | 246.35  | 2.59     | 1.05   |
| 42 | 0.2024 | 1788.92  | 17.68614  | 0.25373  | 0.01778  | 0.14239  | 0.00686  | 2.35089  | 0.11083 | 0.46564  | 0.03263  | 0.00198  | 0.00056  | 1747.148 | 17.39032  | 279.09  | 2.57     | 0.92   |
| 43 | 0.2025 | 27559.14 | 19670.831 | -5.53394 | 5.23513  | 90.1503  | 64.38753 | 96.66446 | 2.4722  | -10.1145 | 9.53109  | 0.37346  | 0.32932  | 915.6666 | 940.48491 | 151.64  | 149.38   | 98.51  |
| 44 | 0.2026 | 5286.41  | 1676.6647 | 286.9193 | 91.07385 | 14.38598 | 4.62183  | 79.96779 | 4.12204 | 660.2396 | 262.8293 | 0.13272  | 0.09953  | 1328.085 | 594.81878 | 215.98  | 91.16    | 42.21  |
| 45 | 0.2215 | 1802.243 | 6.6042    | -0.00184 | 0.00998  | 0.14473  | 0.00391  | 2.37301  | 0.06354 | -0.00338 | 0.01832  | 0.00093  | 0.00064  | 1759.445 | 6.54927   | 280.91  | 0.97     | 0.35   |
| 46 | 0.2221 | 1584.554 | 101.68964 | 20.69133 | 1.39584  | 2.12603  | 0.1954   | 39.54101 | 2.61175 | 38.52874 | 2.6377   | 0.01678  | 0.01191  | 972.1938 | 76.02429  | 160.6   | 12.02    | 7.48   |
| 47 | 0.2257 | 1215.625 | 37.07163  | 33.05613 | 1.04443  | 2.07021  | 0.07121  | 50.10064 | 0.80281 | 62.10323 | 2.0097   | 0.88761  | 0.02752  | 621.0735 | 21.8279   | 104.23  | 3.56     | 3.42   |
| 48 | 0.2352 | 1812.115 | 21.85491  | 1.43722  | 0.03006  | 0.37948  | 0.01255  | 6.18165  | 0.19055 | 2.63977  | 0.00519  | 0.00134  | 0.00134  | 1701.796 | 20.83508  | 272.37  | 3.09     | 1.13   |
| 49 | 0.2493 | 1904.341 | 15.03185  | 0.5471   | 0.02144  | 0.13512  | 0.00464  | 2.09435  | 0.07002 | 1.00424  | 0.03936  | 0.00076  | 0.00058  | 1865.149 | 14.78911  | 296.47  | 2.17     | 0.73   |
| 50 | 0.2534 | 2052.431 | 12.36461  | 3.04311  | 0.0983   | 1.15054  | 0.04068  | 16.553   | 0.57716 | 5.95571  | 0.18114  | 0.00416  | 0.0026   | 1716.356 | 15.76136  | 274.53  | 2.34     | 0.85   |
| 51 | 0.2541 | 5251.089 | 388.22045 | 45.62771 | 3.40772  | 14.29347 | 1.07441  | 80.36397 | 1.09964 | 86.50811 | 6.67602  | 0.10908  | 0.02204  | 1065.431 | 100.9787  | 175.27  | 15.83    | 9.03   |
| 52 | 0.2601 | 2673.792 | 42.69161  | 0.43669  | 0.05414  | 1.51019  | 0.03589  | 16.68902 | 0.29389 | 0.80152  | 0.09399  | 0.02087  | 0.00279  | 2228.225 | 36.4488   | 348.91  | 5.19     | 1.49   |
| 53 | 0.3602 | 144.3651 | 0.5898    | 0.01741  | 0.00174  | 0.01383  | 0.00072  | 2.82962  | 0.14772 | 0.03194  | 0.0032   | 0.00162  | 0.0002   | 140.2529 | 0.61158   | 24.07   | 0.1      | 0.42   |
| 54 | 0.3609 | 1935.342 | 110.51016 | 25.48906 | 1.51949  | 2.46103  | 0.20791  | 37.46851 | 2.3399  | 47.62623 | 2.8912   | 0.06696  | 0.01207  | 1232.364 | 85.22422  | 201.25  | 13.17    | 6.54   |
| 55 | 0.4095 | 1121.729 | 4.95344   | -0.00243 | 0.00458  | 0.06104  | 0.00175  | 1.60811  | 0.0456  | -0.00445 | 0.00839  | 0.00072  | 0.00021  | 1103.66  | 4.90172   | 181.26  | 0.77     | 0.42   |
| 56 | 0.4108 | 927.9491 | 34.0618   | 17.0235  | 0.77742  | 1.05459  | 0.07791  | 33.41762 | 2.51366 | 34.77556 | 1.46489  | 0.97932  | 0.03785  | 626.1006 | 30.87238  | 105.05  | 5.03     | 4.79   |
| 57 | 0.4131 | 1582.229 | 57.61266  | 2.22391  | 0.15883  | 0.92074  | 0.03778  | 17.18457 | 0.32589 | 4.08699  | 0.29236  | 0.00647  | 0.00278  | 1312.366 | 48.14581  | 213.57  | 7.39     | 3.46   |
| 58 | 0.4142 | 2473.531 | 111.86075 | 39.46636 | 1.85534  | 4.18184  | 0.20095  | 49.82734 | 0.81431 | 74.49155 | 3.60229  | 0.01788  | 0.00849  | 1276.603 | 62.92246  | 208.08  | 9.69     | 4.66   |
| 59 | 0.4221 | 964.0482 | 12.5602   | 2.33404  | 0.04693  | 0.31508  | 0.01407  | 9.6382   | 0.41263 | 4.28972  | 0.0864   | 0.00246  | 0.00153  | 872.5427 | 12.06473  | 144.78  | 1.92     | 1.33   |
| 60 | 0.4263 | 696.2933 | 9.36016   | 0.54329  | 0.05034  | 0.49893  | 0.01387  | 21.16871 | 0.51597 | 0.99724  | 0.09243  | -0.0014  | 0.00261  | 549.0843 | 8.2206    | 92.46   | 1.35     | 1.46   |
| 61 | 0.4269 | 6157.407 | 442.20302 | 46.2264  | 3.41664  | 17.67782 | 1.3042   | 84.77612 | 1.43894 | 87.68151 | 6.69341  | 0.04062  | 0.02274  | 969.0267 | 116.5231  | 160.1   | 18.42    | 11.51  |
| 62 | 0.4382 | 306.0112 | 3.01187   | 0.86386  | 0.02512  | 0.52328  | 0.01241  | 50.51187 | 1.09139 | 1.58603  | 0.04615  | 0.00272  | 0.00077  | 151.517  | 3.66242   | 25.99   | 0.62     | 2.39   |
| 63 | 0.4471 | 1379.052 | 25.29956  | 0.22308  | 0.10426  | 0.       |          |          |         |          |          |          |          |          |           |         |          |        |

|            |        |          |           |          |          |          |         |          |         |          |          |         |         |          |           |        |       |       |
|------------|--------|----------|-----------|----------|----------|----------|---------|----------|---------|----------|----------|---------|---------|----------|-----------|--------|-------|-------|
| 99         | 0.7715 | 417.4208 | 26.79352  | 8.23553  | 0.59436  | 0.58028  | 0.10895 | 40.91917 | 7.25115 | 15.19946 | 1.10336  | 0.02868 | 0.00949 | 248.0409 | 34.41391  | 42.35  | 5.81  | 13.72 |
| 100        | 0.7743 | 1459.48  | 70.12281  | 13.93976 | 0.68697  | 2.80177  | 0.15242 | 56.6496  | 1.44892 | 25.83183 | 1.28568  | 0.11024 | 0.00808 | 638.9681 | 37.65864  | 107.15 | 6.13  | 5.72  |
| 101        | 0.7745 | 7994.438 | 3054.5232 | 2.24759  | 1.94249  | 25.10131 | 9.64052 | 92.78048 | 3.61911 | 4.13057  | 3.57554  | 0.09697 | 0.08228 | 578.0753 | 364.59492 | 97.21  | 59.69 | 61.40 |
| 102        | 0.7747 | 4185.232 | 1212.4707 | 37.8854  | 11.01842 | 11.99482 | 3.52272 | 84.61586 | 4.08487 | 71.42059 | 21.34414 | 0.17975 | 0.07284 | 661.5577 | 263.89974 | 110.82 | 42.88 | 38.69 |
| 103        | 0.7827 | 1034.933 | 18.53739  | 2.49277  | 0.06024  | 0.64271  | 0.02617 | 18.33161 | 0.67124 | 4.58195  | 0.11091  | 0.02162 | 0.00185 | 846.6793 | 16.7116   | 140.65 | 2.67  | 1.90  |
| 104        | 0.7836 | 2010.17  | 175.92294 | 1.79916  | 0.44154  | 1.93314  | 0.26235 | 28.41073 | 2.94795 | 3.30541  | 0.81222  | 0.02545 | 0.01734 | 1440.875 | 139.51735 | 233.19 | 21.18 | 9.08  |
| 105        | 0.8268 | 615.1909 | 2.22047   | 0.00431  | 0.00636  | 0.02716  | 0.00258 | 1.30442  | 0.12366 | 0.00791  | 0.01167  | 0.0018  | 0.00034 | 607.1388 | 2.31995   | 101.96 | 0.38  | 0.37  |
| 106        | 0.8276 | 1233.936 | 95.56637  | 9.45165  | 0.83639  | 2.61767  | 0.26033 | 62.62559 | 3.9122  | 17.45901 | 1.55535  | 0.01947 | 0.01897 | 464.2641 | 60.60501  | 78.48  | 10.02 | 12.77 |
| 107        | 0.8297 | 1240.593 | 50.74646  | 12.48154 | 0.53623  | 1.94776  | 0.10402 | 46.31236 | 1.59358 | 23.10557 | 1.00149  | 0.51964 | 0.02374 | 671.9522 | 34.16615  | 112.51 | 5.55  | 4.93  |
| 108        | 0.8301 | 1792.242 | 297.38748 | 93.39296 | 15.55307 | 2.04294  | 0.40753 | 33.25444 | 3.7309  | 183.4637 | 32.71031 | 0.00788 | 0.03912 | 1280.692 | 238.52996 | 208.71 | 36.71 | 17.59 |
| 109        | 0.8366 | 267.1475 | 4.48496   | 1.0368   | 0.05504  | 0.34692  | 0.0201  | 38.34621 | 2.12939 | 1.90378  | 0.10115  | 0.00558 | 0.00287 | 164.8089 | 6.33459   | 28.25  | 1.08  | 3.82  |
| 110        | 0.8532 | 793.0978 | 8.98831   | 0.42859  | 0.02207  | 0.07226  | 0.00605 | 2.68792  | 0.22353 | 0.78665  | 0.04053  | 0.00123 | 0.00103 | 771.9847 | 8.93001   | 128.67 | 1.44  | 1.12  |
| 111        | 0.854  | 2020.565 | 125.03258 | 167.3622 | 10.5311  | 2.28934  | 0.20434 | 32.79834 | 2.15425 | 348.2471 | 24.85025 | 0.04171 | 0.01931 | 1539.834 | 118.83526 | 248.15 | 17.89 | 7.21  |
| 112        | 0.8547 | 3837.229 | 385.83473 | 164.4895 | 16.57358 | 7.99282  | 0.82501 | 61.19871 | 1.43619 | 341.4842 | 38.92937 | 0.0594  | 0.02499 | 1684.572 | 201.55001 | 269.81 | 29.98 | 11.11 |
| 113        | 0.8556 | 2639.332 | 163.18654 | 25.62927 | 1.72289  | 2.86548  | 0.23213 | 32.00231 | 1.67993 | 47.89304 | 3.27889  | 0.03943 | 0.01739 | 1827.747 | 123.65108 | 290.98 | 18.18 | 6.25  |
| 114        | 0.8578 | 2306.575 | 81.35428  | 2.88072  | 0.21982  | 1.35363  | 0.08848 | 17.33149 | 0.9546  | 5.2965   | 0.04948  | 0.11135 | 0.0094  | 1910.674 | 71.05072  | 303.13 | 10.38 | 3.42  |
| 115        | 0.8671 | 147.7952 | 1.45216   | 0.54195  | 0.04653  | 0.05153  | 0.0125  | 10.27427 | 2.4985  | 0.99478  | 0.08545  | 0.00653 | 0.00153 | 132.6344 | 3.91728   | 22.77  | 0.67  | 2.94  |
| 116        | 0.8732 | 171.2466 | 3.39597   | 0.9654   | 0.07518  | 0.06747  | 0.02191 | 11.59855 | 3.77533 | 1.77259  | 0.13813  | 0.00398 | 0.00235 | 151.4615 | 7.13437   | 25.98  | 1.22  | 4.70  |
| 117        | 0.8887 | 158.8409 | 1.39313   | 0.17802  | 0.0277   | 0.05426  | 0.00811 | 10.08716 | 1.50709 | 0.32669  | 0.05084  | 0.00786 | 0.00079 | 142.8097 | 2.70271   | 24.51  | 0.46  | 1.88  |
| 118        | 0.9235 | 973.5466 | 7.55814   | 1.02688  | 0.02194  | 0.10593  | 0.00424 | 3.20679  | 0.12616 | 1.88556  | 0.04031  | 0.01879 | 0.00051 | 942.9822 | 7.42909   | 155.98 | 1.18  | 0.76  |
| 119        | 0.951  | 752.077  | 3.75165   | 0.45407  | 0.02018  | 2.03195  | 0.02681 | 79.83576 | 0.97577 | 0.83342  | 0.03704  | 0.00598 | 0.00129 | 151.6933 | 7.38053   | 26.02  | 1.26  | 4.84  |
| 120        | 0.9838 | 1019.245 | 9.76952   | 0.23606  | 0.01699  | 0.22288  | 0.00756 | 6.46002  | 0.21015 | 0.43322  | 0.03118  | 0.00176 | 0.00068 | 953.5326 | 9.38965   | 157.65 | 1.49  | 0.95  |
| 121        | 1      | 272.9243 | 1.9626    | 0.70083  | 0.02192  | 0.37635  | 0.01141 | 40.73124 | 1.20184 | 1.28657  | 0.04025  | 0.01146 | 0.0013  | 161.8213 | 3.48656   | 27.74  | 0.59  | 2.13  |
| Integrated |        | 953.1111 | 1.14522   | 2.66054  | 0.00606  | 0.5795   | 0.00169 | 17.94422 | 0.04773 | 4.89091  | 0.01117  | 0.01726 | 0.00015 | 783.5305 | 1.04785   | 130.53 | 0.66  | 0.51  |

# CROSS CREEK

Weighted average of J from standards = 9.588e-05 +/- 4.822e-07

| Grain # | Cumulative 40Ar/39Ar +/- |          | 37Ar/39Ar +/- |          | 36Ar/39Ar +/- |          | % Atm.  | +/-      | Ca/K    | +/-      | Cl/K     | +/-      | 40*/39K | +/-       | Age (Ma)  | +/- (Ma) | %error |       |
|---------|--------------------------|----------|---------------|----------|---------------|----------|---------|----------|---------|----------|----------|----------|---------|-----------|-----------|----------|--------|-------|
| 1       | 0.0029                   | 1655.773 | 34.11737      | 12.76547 | 0.32994       | 1.07204  | 0.04155 | 19.06919 | 0.62862 | 23.63595 | 0.61647  | 0.01732  | 0.00469 | 1352.197  | 30.03001  | 219.68   | 4.59   | 2.09  |
| 2       | 0.0064                   | 1375.638 | 31.38192      | 33.40264 | 0.78719       | 0.17891  | 0.02342 | 3.64298  | 0.49551 | 62.76995 | 1.51501  | 0.0254   | 0.0055  | 1357.519  | 32.47764  | 220.49   | 4.97   | 2.25  |
| 3       | 0.0085                   | 1624.276 | 113.26892     | 38.22929 | 2.68271       | 1.15226  | 0.09157 | 20.76905 | 0.7996  | 72.09182 | 5.19935  | 0.04756  | 0.00896 | 1322.615  | 95.73591  | 215.15   | 14.68  | 6.82  |
| 4       | 0.0343                   | 236.8063 | 2.48421       | 0.66712  | 0.01555       | 0.62982  | 0.01206 | 78.58625 | 1.26353 | 0.85739  | 0.02856  | 0.00443  | 0.00071 | 50.71948  | 3.04237   | 8.74     | 0.52   | 5.95  |
| 5       | 0.0375                   | 1743.803 | 25.30533      | 26.70136 | 0.50798       | 0.83998  | 0.02987 | 14.10808 | 0.46251 | 49.93495 | 0.96824  | 0.01428  | 0.00471 | 1526.547  | 24.04431  | 246.15   | 3.62   | 1.47  |
| 6       | 0.0709                   | 1593.858 | 13.08727      | 0.13184  | 0.00987       | 0.07866  | 0.00506 | 1.45771  | 0.09311 | 0.24193  | 0.01811  | 0.00173  | 0.00055 | 1570.741  | 12.98416  | 252.8    | 1.95   | 0.77  |
| 7       | 0.0755                   | 1548.843 | 32.16066      | 32.7624  | 0.715         | 0.33587  | 0.01367 | 6.23371  | 0.2247  | 61.53833 | 1.3748   | 0.00973  | 0.00166 | 1486.662  | 31.8076   | 240.13   | 4.81   | 2.00  |
| 8       | 0.0855                   | 1358.029 | 12.30576      | 14.91246 | 0.1497        | 0.19845  | 0.00854 | 4.2278   | 0.18176 | 27.65354 | 0.28055  | 0.00797  | 0.00104 | 1314.429  | 12.29399  | 213.89   | 1.89   | 0.88  |
| 9       | 0.0945                   | 2511.78  | 40.41124      | 0.56255  | 0.02251       | 1.34709  | 0.02997 | 15.8463  | 0.24366 | 1.03261  | 0.04133  | 0.00633  | 0.0021  | 2114.571  | 34.58243  | 332.66   | 4.97   | 1.49  |
| 10      | 0.0946                   | 5718.744 | 2771.7116     | 186.8193 | 90.6203       | 16.14968 | 7.86492 | 83.18004 | 3.98106 | 394.8869 | 220.6602 | 0.12682  | 0.14706 | 1108.08   | 672.05151 | 181.95   | 104.96 | 57.69 |
| 11      | 0.1                      | 843.3684 | 26.30809      | 1.26258  | 0.07164       | 0.30856  | 0.01525 | 10.79939 | 0.4151  | 2.31873  | 0.13168  | 0.00854  | 0.0015  | 752.9347  | 23.7747   | 125.61   | 3.83   | 3.05  |
| 12      | 0.1077                   | 2217.229 | 34.17463      | 38.80345 | 0.07626       | 3.10822  | 0.06336 | 41.41103 | 0.55284 | 6.99761  | 0.14068  | 0.01369  | 0.00339 | 1302.533  | 23.58948  | 212.06   | 3.62   | 1.71  |
| 13      | 0.1081                   | 1809.459 | 269.20267     | 57.3741  | 8.5648        | 1.92916  | 0.3343  | 31.24402 | 2.80059 | 109.7192 | 17.07055 | -0.00783 | 0.02869 | 1296.629  | 207.89103 | 211.16   | 31.95  | 15.13 |
| 14      | 0.1119                   | 1767.502 | 50.84706      | 20.18847 | 0.59837       | 1.41541  | 0.05177 | 23.56974 | 0.53574 | 37.57883 | 1.12991  | 0.01257  | 0.00414 | 1370.422  | 41.14854  | 222.46   | 6.28   | 2.82  |
| 15      | 0.1181                   | 1433.217 | 31.06232      | 10.14519 | 0.24149       | 0.7094   | 0.02129 | 14.5684  | 0.30369 | 18.74937 | 0.44952  | 0.01688  | 0.00272 | 1233.231  | 27.27685  | 201.39   | 4.21   | 2.09  |
| 16      | 0.1191                   | 2947.325 | 141.01226     | 85.3771  | 4.13476       | 7.75476  | 0.40133 | 77.51153 | 1.53928 | 166.7067 | 8.59153  | 0.18227  | 0.02578 | 705.3298  | 60.20988  | 117.92   | 9.74   | 8.26  |
| 17      | 0.1331                   | 84.98991 | 1.15359       | 4.93795  | 0.07637       | 0.08245  | 0.00631 | 28.19828 | 2.1589  | 9.09216  | 0.14111  | 0.01503  | 0.00097 | 61.21644  | 2.02203   | 10.55    | 0.35   | 3.32  |
| 18      | 0.1609                   | 1721.74  | 9.9883        | 2.26467  | 0.03259       | 0.16421  | 0.00434 | 8.80756  | 0.07268 | 4.16201  | 0.05998  | 0.0028   | 0.0006  | 1676.052  | 9.81981   | 268.54   | 1.46   | 0.54  |
| 19      | 0.1669                   | 1514.273 | 25.49223      | 14.37944 | 0.28185       | 0.50248  | 0.0147  | 9.72739  | 0.23462 | 26.65497 | 0.52783  | 0.02009  | 0.00222 | 1380.971  | 23.76098  | 224.07   | 3.63   | 1.62  |
| 20      | 0.1763                   | 1479.917 | 24.37376      | 12.71595 | 0.22568       | 0.22119  | 0.01142 | 4.34576  | 0.21619 | 23.54344 | 0.42164  | 0.02061  | 0.00136 | 1428.402  | 23.9579   | 231.29   | 3.64   | 1.57  |
| 21      | 0.1905                   | 1409.074 | 24.979        | 4.17464  | 0.08697       | 0.90245  | 0.01926 | 18.9015  | 0.22502 | 7.68254  | 0.16052  | 0.01233  | 0.00124 | 1146.093  | 20.62522  | 187.87   | 3.21   | 1.71  |
| 22      | 0.1957                   | 1267.955 | 34.45384      | 4.49369  | 0.14372       | 1.28809  | 0.04682 | 29.99077 | 0.72558 | 8.27156  | 0.26538  | 0.01289  | 0.00261 | 890.4911  | 25.97889  | 147.64   | 4.14   | 2.80  |
| 23      | 0.1969                   | 2014.296 | 150.25829     | 22.72945 | 1.73847       | 2.0183   | 0.17135 | 29.5161  | 1.20217 | 42.38578 | 3.29478  | 0.01333  | 0.00833 | 1442.895  | 112.1478  | 233.5    | 17.02  | 7.29  |
| 24      | 0.2046                   | 1323.078 | 20.29096      | 8.73082  | 0.17321       | 0.58421  | 0.01392 | 12.99371 | 0.2381  | 16.11923 | 0.32178  | 0.01939  | 0.00195 | 1158.277  | 18.15419  | 189.77   | 2.82   | 1.49  |
| 25      | 0.2058                   | 1624.144 | 143.11875     | 25.60999 | 2.26939       | 1.45795  | 0.14368 | 26.39679 | 1.17212 | 47.85635 | 4.31882  | 0.03671  | 0.01158 | 1217.419  | 110.97754 | 198.94   | 17.17  | 8.63  |
| 26      | 0.2097                   | 1436.933 | 33.08908      | 18.37417 | 0.52506       | 0.19596  | 0.01923 | 3.9245   | 0.3845  | 34.1573  | 0.98892  | 0.00605  | 0.00315 | 1398.662  | 33.1116   | 226.77   | 5.04   | 2.22  |
| 27      | 0.2113                   | 665.9557 | 26.6326       | 11.52162 | 0.49431       | 1.63706  | 0.10007 | 72.5006  | 3.36115 | 21.31402 | 0.92194  | 0.04916  | 0.00693 | 184.628   | 23.76957  | 31.62    | 4.04   | 12.78 |
| 28      | 0.2121                   | 2764.75  | 294.18013     | 57.99528 | 6.18329       | 4.84577  | 0.54061 | 51.61981 | 1.73946 | 110.9579 | 12.33522 | 0.07697  | 0.02016 | 139.734   | 162.68556 | 226.17   | 24.79  | 10.96 |
| 29      | 0.2168                   | 1399.67  | 30.80877      | 5.41083  | 0.16351       | 0.41277  | 0.0157  | 8.68271  | 0.2704  | 9.96621  | 0.30233  | 0.00427  | 0.00289 | 1283.016  | 28.60708  | 209.06   | 4.4    | 2.10  |
| 30      | 0.2395                   | 65.33375 | 0.48331       | 0.50517  | 0.02156       | 0.04245  | 0.0052  | 19.14301 | 2.34788 | 0.92725  | 0.03959  | 0.0045   | 0.00052 | 52.82174  | 1.58369   | 9.1      | 0.27   | 2.97  |
| 31      | 0.2438                   | 1425.341 | 32.78878      | 28.42923 | 0.68642       | 0.29121  | 0.02749 | 5.87297  | 0.55274 | 53.23247 | 1.31162  | 0.02452  | 0.00452 | 1369.091  | 33.13397  | 222.26   | 5.06   | 2.28  |
| 32      | 0.2455                   | 54.0017  | 19.00082      | 13.81888 | 0.61238       | 0.62443  | 0.06106 | 40.40183 | 3.59513 | 24.85736 | 1.14523  | 0.00666  | 0.01186 | 273.1477  | 20.13315  | 46.59    | 3.39   | 7.28  |
| 33      | 0.2499                   | 1421.122 | 19.70238      | 11.32218 | 0.18305       | 0.28224  | 0.01885 | 5.80312  | 0.38361 | 20.94208 | 0.34132  | 0.02198  | 0.0036  | 1349.414  | 19.68277  | 219.25   | 3.01   | 1.37  |
| 34      | 0.2538                   | 1165.749 | 22.11186      | 2.6243   | 0.10095       | 0.34205  | 0.0258  | 8.65222  | 0.63292 | 4.82417  | 0.18592  | 0.01514  | 0.00393 | 1066.836  | 21.58205  | 175.49   | 3.38   | 1.93  |
| 35      | 0.2593                   | 1270.015 | 25.85254      | 16.75954 | 0.36352       | 3.26686  | 0.07484 | 75.90448 | 0.80387 | 31.11978 | 0.68309  | 0.11642  | 0.00456 | 309.6751  | 12.16041  | 52.73    | 2.04   | 3.87  |
| 36      | 0.2637                   | 1508.301 | 27.04309      | 15.0059  | 0.30838       | 0.47747  | 0.02189 | 9.27262  | 0.39475 | 27.82868 | 0.57802  | 0.02424  | 0.0033  | 1383.072  | 25.77928  | 224.39   | 3.93   | 1.75  |
| 37      | 0.2701                   | 1306.712 | 23.64582      | 11.73587 | 0.23913       | 1.49797  | 0.03754 | 32.46035 | 0.59179 | 21.71368 | 0.44614  | 0.03975  | 0.00454 | 926.6805  | 18.04668  | 153.39   | 2.86   | 1.86  |
| 38      | 0.2737                   | 1508.038 | 46.58926      | 22.66586 | 0.7417        | 0.40257  | 0.03147 | 7.76455  | 0.86621 | 42.26527 | 1.40555  | 0.04067  | 0.00518 | 1413.545  | 45.22696  | 229.03   | 6.88   | 3.00  |
| 39      | 0.2744                   | 2557.749 | 260.14235     | 70.31488 | 7.19579       | 3.35617  | 0.37509 | 38.54809 | 1.50161 | 135.7596 | 14.61914 | 0.05345  | 0.02635 | 1653.897  | 183.57955 | 265.24   | 27.38  | 10.32 |
| 40      | 0.2746                   | 12400.2  | 2285.3979     | 754.1287 | 139.0632      | 39.86335 | 7.36751 | 94.49419 | 1.31519 | 2960.32  | 1167.872 | 2.11225  | 0.39972 | 1460.625  | 673.49265 | 236.18   | 102.07 | 43.22 |
| 41      | 0.2795                   | 1398.66  | 38.59926      | 18.90657 | 0.54982       | 0.51897  | 0.02683 | 10.85324 | 0.47946 | 35.16041 | 1.03633  | 0.00539  | 0.0049  | 1263.707  | 35.9982   | 206.09   | 5.55   | 2.69  |
| 42      | 0.2834                   | 1688.373 | 49.49061      | 12.75082 | 0.6431        | 0.66216  | 0.03849 | 11.52711 | 0.58203 | 23.60859 | 0.7965   | 0.01029  | 0.00466 | 1507.299  | 45.68241  | 243.24   | 6.9    | 2.84  |
| 43      | 0.3159                   | 56.20641 | 0.33275       | 0.8825   | 0.01458       | 0.02249  | 0.00463 | 11.70187 | 2.43582 | 1.62027  | 0.02679  | 0.00276  | 0.0005  | 49.63393  | 1.40167   | 8.56     | 0.24   | 2.80  |
| 44      | 0.3187                   | 1351.945 | 53.69915      | 9.56057  | 0.41396       | 0.91159  | 0.06331 | 19.86724 | 1.13556 | 17.66158 | 0.76993  | 0.05908  | 0.00771 | 1090.691  | 46.28216  | 179.23   | 7.24   | 4.04  |
| 45      | 0.3212                   | 1581.62  | 49.79804      | 37.31213 | 1.23779       | 0.58874  | 0.05209 | 10.80584 | 0.90956 | 70.15889 | 2.39948  | 0.00911  | 0.00749 | 1448.78   | 49.12822  | 234.39   | 7.45   | 3.18  |
| 46      | 0.3235                   | 1143.508 | 33.67247      | 22.41481 | 0.70724       | 0.49455  | 0.0673  | 12.61871 | 1.69823 | 41.7896  | 1.33976  | 0.03126  | 0.00867 | 1015.258  | 36.22913  | 167.39   | 5.7    | 3.41  |
| 47      | 0.3285                   | 1568.342 | 32.66158      | 4.92299  | 0.15884       | 0.6158   | 0.0277  | 11.57694 | 0.4627  | 9.06453  | 0.29348  | 0.00632  | 0.00376 | 1391.588  | 29.98552  | 225.69   | 4.57   | 2.02  |
| 48      | 0.3516                   | 61.73492 | 0.33857       | 0.39006  | 0.01955       | 0.02989  | 0.00477 | 14.26389 | 2.28206 | 0.7159   | 0.0359   | 0.00146  | 0.00076 | 52.91824  | 1.43894   | 9.12     | 0.25   | 2.74  |
| 49      | 0.3522                   | 1372.023 | 235.69943     | 15.78537 | 2.76651       | 0.84829  | 0.19323 | 18.17568 | 2.73413 | 29.29051 | 5.19126  | 0.0642   | 0.0251  | 1135.28   | 200.86328 | 186.19   | 31.3   | 16.81 |
| 50      | 0.3577                   | 1734.734 | 33.10948      | 14.09939 | 0.35026       | 0.43355  | 0.02789 | 9.23492  | 0.55614 | 26.13064 | 0.65567  | 0.00901  | 0.0029  | 1260.301  | 31.62153  | 205.57   | 4.87   | 2.37  |
| 51      | 0.3585                   | 973.2352 | 64.11341      | 26.51053 | 1.81781       | 1.02864  | 0.08576 | 31.0087  | 1.59688 | 49.57126 | 3.46392  | 0.03331  | 0.00841 | 684.2379  | 48.597    | 114.5    | 7.88   | 6.88  |
| 52      | 0.362                    | 1200.079 | 30.91547      | 27.29947 | 0.73858       | 1.17538  | 0.02211 | 4.13098  | 0.53305 | 51.07547 | 1.409    | 0.02422  | 0.00338 | 1173.093  | 31.50069  | 192.07   | 4.89   | 2.55  |
| 53      | 0.3686                   | 1680.116 | 37.49666      | 21.66462 | 0.51727       | 0.86309  | 0.02817 | 15.07407 | 0.36168 | 40.36925 | 0.97884  | 0.02369  | 0.00264 | 1448.999  | 33.41778  | 234.42   | 5.07   | 2.16  |
| 54      | 0.3992                   | 59.81595 | 0.32149       | 0.73987  | 0.02129       | 0.01803  | 0.00255 | 8.80993  | 1.11003 | 1.35826  | 0.02981  | 0.00463  | 0.00047 | 54.54763  | 0.72648   | 9.4      | 0.12   | 1.28  |
| 55      | 0.4027                   | 2460.316 | 71.90355      | 14.94289 | 0.49561       | 0.49561  | 0.13054 | 50.51368 | 0.52806 | 27.71058 | 0.93888  | 0.04168  | 0.00636 | 1230.49</ |           |          |        |       |

|     |        |          |           |          |          |          |          |          |          |          |          |          |         |          |           |         |         |          |
|-----|--------|----------|-----------|----------|----------|----------|----------|----------|----------|----------|----------|----------|---------|----------|-----------|---------|---------|----------|
| 61  | 0.4509 | 1601.94  | 35.54287  | 14.31313 | 0.34601  | 0.47149  | 0.01578  | 8.62383  | 0.21795  | 26.53081 | 0.64791  | 0.00921  | 0.00294 | 1478.711 | 33.33226  | 238.92  | 5.04    | 2.11     |
| 62  | 0.4527 | 1469.233 | 75.29095  | 29.99462 | 1.56966  | 0.79394  | 0.06     | 15.80012 | 0.88721  | 56.22704 | 3.00612  | 0.05742  | 0.01078 | 1263.84  | 67.49951  | 206.11  | 10.4    | 5.05     |
| 63  | 0.4724 | 2419.701 | 26.55542  | 0.85933  | 0.02871  | 0.36903  | 0.00797  | 4.50379  | 0.08389  | 1.57772  | 0.05274  | 0.00313  | 0.00114 | 2312.098 | 25.4719   | 360.82  | 3.6     | 1.00     |
| 64  | 0.4839 | 367.3522 | 5.3612    | 4.74945  | 0.08673  | 1.01205  | 0.02711  | 81.30942 | 1.8294   | 8.74392  | 0.16022  | 0.00944  | 0.00174 | 68.88577 | 6.81839   | 11.86   | 1.17    | 0.97     |
| 65  | 0.4978 | 68.15961 | 0.29392   | 4.29844  | 0.03631  | 0.03048  | 0.00495  | 12.69856 | 2.14416  | 7.91106  | 0.06702  | 0.01294  | 0.00121 | 59.65957 | 1.48834   | 10.28   | 0.26    | 2.53     |
| 66  | 0.5081 | 1444.289 | 14.17318  | 4.89734  | 0.06536  | 0.96499  | 0.01302  | 19.71603 | 0.18298  | 9.01712  | 0.12076  | 0.00975  | 0.00176 | 1163.533 | 11.76248  | 190.59  | 1.83    | 0.96     |
| 67  | 0.5097 | 1679.157 | 66.78141  | 58.76229 | 2.35739  | 1.54587  | 0.07925  | 26.91644 | 0.88178  | 112.4889 | 4.70815  | 0.05123  | 0.01068 | 1280.298 | 55.34612  | 208.65  | 8.52    | 4.08     |
| 68  | 0.5103 | 2382.752 | 399.53603 | 53.6075  | 9.04362  | 4.77686  | 0.81013  | 59.05612 | 1.51117  | 102.2328 | 17.92536 | 0.02041  | 0.02958 | 1013.967 | 180.65302 | 167.19  | 28.45   | 17.02    |
| 69  | 0.5259 | 2205.854 | 29.76649  | 0.0091   | 0.01647  | 0.20829  | 0.00968  | 2.79032  | 0.12404  | 0.01669  | 0.03022  | -0.00039 | 0.00102 | 2144.288 | 29.06562  | 336.93  | 4.17    | 1.24     |
| 70  | 0.5283 | 2190.447 | 65.16805  | 7.49085  | 0.27481  | 3.09181  | 0.09793  | 41.68208 | 0.45453  | 13.81779 | 0.50962  | 0.0683   | 0.00957 | 1284.199 | 39.70197  | 209.25  | 6.11    | 2.92     |
| 71  | 0.5433 | 222.2178 | 3.39737   | 5.11273  | 0.09861  | 0.5362   | 0.01123  | 71.12223 | 1.02612  | 9.41516  | 0.18225  | 0.00412  | 0.00145 | 64.39552 | 2.49658   | 11.09   | 0.43    | 3.88     |
| 72  | 0.5441 | 2163.25  | 213.01115 | 34.92293 | 3.50435  | 2.9076   | 0.3015   | 39.58528 | 1.29276  | 65.6991  | 6.75931  | 0.05704  | 0.02124 | 1339.951 | 138.29962 | 217.8   | 21.17   | 9.72     |
| 73  | 0.5456 | 1308.777 | 62.87108  | 17.62889 | 0.87853  | 1.89103  | 0.11752  | 42.58616 | 1.68808  | 32.75437 | 1.65287  | 0.02222  | 0.01376 | 760.8751 | 43.29096  | 126.89  | 6.97    | 5.49     |
| 74  | 0.5463 | 2418.844 | 262.68911 | 149.2738 | 16.27162 | 5.6444   | 0.62953  | 68.44731 | 1.75752  | 306.1735 | 37.30742 | 0.22791  | 0.0317  | 853.1392 | 113.98911 | 141.68  | 18.21   | 12.85    |
| 75  | 0.5515 | 3275.735 | 75.01269  | 0.01858  | 0.04957  | 5.10565  | 0.12855  | 46.05785 | 0.48223  | 0.0341   | 0.09096  | 0.01765  | 0.00459 | 1767.009 | 43.44244  | 282.03  | 6.42    | 2.28     |
| 76  | 0.5518 | 2049.253 | 587.46713 | 163.1585 | 46.80269 | 4.5139   | 1.3125   | 64.34444 | 3.16887  | 338.3609 | 109.7005 | -0.02068 | 0.03404 | 823.7335 | 276.8265  | 136.98  | 44.33   | 32.36    |
| 77  | 0.5551 | 1813.006 | 50.238    | 2.8209   | 0.05371  | 0.397468 | 0.39058  | 5.18629  | 0.26957  | 0.01014  | 0.00375  | 0.05672  | 0.01014 | 1392.732 | 43.98693  | 251.59  | 6.61    | 2.63     |
| 78  | 0.5603 | 1555.726 | 29.28078  | 20.48044 | 0.43192  | 0.47436  | 0.02032  | 8.90172  | 0.34704  | 38.13029 | 0.81594  | 0.02828  | 0.00297 | 1438.011 | 28.01301  | 232.75  | 4.25    | 1.83     |
| 79  | 0.5657 | 1651.181 | 29.88356  | 15.2     | 0.29074  | 0.31156  | 0.02055  | 5.49996  | 0.35367  | 28.19253 | 0.5451   | 0.01353  | 0.00288 | 1577.271 | 29.45424  | 253.78  | 4.42    | 1.74     |
| 80  | 0.5679 | 1581.93  | 53.11155  | 13.3491  | 0.46013  | 0.6927   | 0.07159  | 12.87012 | 1.26493  | 24.72688 | 0.86041  | 0.01108  | 0.00644 | 1391.425 | 51.30848  | 225.67  | 7.82    | 3.47     |
| 81  | 0.5808 | 1176.319 | 11.87426  | 2.55399  | 0.05266  | 0.34647  | 0.01206  | 6.88595  | 0.28996  | 4.6947   | 0.09697  | 0.01873  | 0.00159 | 1076.058 | 11.40657  | 176.94  | 1.79    | 1.01     |
| 82  | 0.5823 | 1362.122 | 103.46845 | 19.18059 | 0.03468  | 0.06512  | 0.24308  | 1.57444  | 1.35488  | 35.67702 | 2.83381  | 0.01886  | 0.01601 | 1309.582 | 102.56852 | 213.15  | 15.74   | 7.38     |
| 83  | 0.5955 | 214.3636 | 2.32328   | 0.62739  | 0.02192  | 0.12297  | 0.00674  | 16.92985 | 0.91198  | 1.15168  | 0.04025  | 0.00306  | 0.0013  | 178.1264 | 2.75202   | 30.52   | 0.47    | 1.54     |
| 84  | 0.6038 | 1470.342 | 20.23559  | 11.34602 | 0.2078   | 0.57397  | 0.01732  | 11.47181 | 0.30971  | 20.98655 | 0.38747  | 0.01683  | 0.00148 | 1312.155 | 18.77584  | 213.54  | 2.88    | 1.35     |
| 85  | 0.6063 | 1530.719 | 47.29796  | 18.32326 | 0.6218   | 1.21195  | 0.06006  | 23.29814 | 0.90755  | 34.06142 | 1.17102  | 0.024    | 0.00533 | 1189.459 | 39.82732  | 194.61  | 6.18    | 3.18     |
| 86  | 0.6115 | 1453.853 | 31.46917  | 18.78706 | 0.4549   | 0.63311  | 0.02858  | 12.76194 | 0.51002  | 34.93518 | 0.85727  | 0.02659  | 0.00277 | 1285.341 | 29.18642  | 209.42  | 4.49    | 2.14     |
| 87  | 0.6127 | 1157.044 | 50.63541  | 50.80613 | 2.27942  | 0.84042  | 0.09724  | 21.10214 | 2.29935  | 96.69155 | 4.49952  | 0.03174  | 0.0108  | 946.8324 | 51.08294  | 156.59  | 8.09    | 5.17     |
| 88  | 0.6167 | 1733.163 | 60.49697  | 18.51696 | 0.6884   | 1.59331  | 0.06382  | 27.07789 | 0.53534  | 34.42626 | 1.29682  | 0.02156  | 0.0037  | 1280.584 | 46.27298  | 208.69  | 7.12    | 3.41     |
| 89  | 0.6212 | 1463.827 | 19.2246   | 2.30993  | 0.09418  | 0.69616  | 0.02916  | 14.0405  | 0.55936  | 4.24532  | 0.17338  | 0.01159  | 0.0043  | 1260.329 | 18.51036  | 205.57  | 2.85    | 1.39     |
| 90  | 0.6236 | 1484.511 | 63.27282  | 17.61633 | 0.79559  | 1.08617  | 0.06998  | 21.52341 | 1.04508  | 32.73075 | 1.4968   | 0.00995  | 0.0054  | 1179.646 | 53.28797  | 193.09  | 8.27    | 4.28     |
| 91  | 0.6272 | 1444.067 | 52.96078  | 5.74783  | 0.23181  | 0.39198  | 0.03054  | 7.98848  | 0.55147  | 10.58947 | 0.42882  | -0.00063 | 0.00563 | 1334.096 | 49.77743  | 216.91  | 7.63    | 3.52     |
| 92  | 0.6353 | 1783.091 | 37.94112  | 5.2276   | 0.14024  | 1.65429  | 0.04263  | 27.39179 | 0.39874  | 9.62747  | 0.25923  | 0.0083   | 0.00272 | 1299.446 | 28.65726  | 211.59  | 4.4     | 2.08     |
| 93  | 0.636  | 1640.043 | 215.21785 | 23.58498 | 3.22922  | 2.1107   | 0.30564  | 37.9124  | 2.32988  | 44.0082  | 6.1276   | 0.09262  | 0.02755 | 1035.492 | 143.56219 | 170.57  | 22.56   | 13.23    |
| 94  | 0.6584 | 90.35796 | 0.86947   | 1.68259  | 0.02257  | 0.13087  | 0.00577  | 42.65853 | 1.84253  | 3.09099  | 0.04152  | 0.00661  | 0.00085 | 51.8572  | 1.74135   | 8.94    | 0.3     | 3.36     |
| 95  | 0.6613 | 956.0132 | 37.87242  | 0.06662  | 0.13209  | 0.29559  | 0.03392  | 9.13633  | 0.98413  | 0.12225  | 0.2424   | 0.00481  | 0.00568 | 868.6826 | 35.67993  | 144.16  | 5.69    | 3.95     |
| 96  | 0.6631 | 3106.041 | 109.95816 | -0.12375 | 0.1886   | 4.21133  | 0.16344  | 40.06613 | 0.63816  | -0.22704 | 0.34599  | 0.01437  | 0.00665 | 1861.39  | 68.82079  | 295.92  | 10.09   | 3.41     |
| 97  | 0.6705 | 1255.708 | 20.16878  | 2.23383  | 0.07027  | 0.29029  | 0.01424  | 6.81681  | 0.31671  | 4.10524  | 0.12935  | 0.0088   | 0.0019  | 1171.93  | 19.26994  | 191.89  | 2.99    | 1.56     |
| 98  | 0.6711 | 1297.327 | 130.28626 | 1.1117   | 0.36512  | 0.61631  | 0.15592  | 14.03138 | 3.25994  | 2.04142  | 0.671    | 0.06768  | 0.01948 | 1116.145 | 119.90348 | 183.21  | 18.71   | 10.21    |
| 99  | 0.6877 | 1250.927 | 12.16677  | 3.59241  | 0.05658  | 0.3929   | 0.00877  | 9.25784  | 0.18661  | 6.60834  | 0.10435  | 0.00479  | 0.00098 | 1137.978 | 11.34142  | 186.61  | 1.77    | 0.95     |
| 100 | 0.6885 | 1368.481 | 137.85261 | 52.48284 | 5.34534  | 2.83893  | 0.32453  | 60.98698 | 3.31471  | 100.0054 | 10.57754 | 0.11824  | 0.02706 | 554.424  | 74.7326   | 93.33   | 12.26   | 13.14    |
| 101 | 0.6914 | 1679.404 | 51.35102  | 11.51    | 0.41211  | 1.30718  | 0.06246  | 22.94441 | 0.84525  | 21.29235 | 0.76861  | 0.01224  | 0.00557 | 1304.657 | 42.70219  | 212.39  | 6.56    | 3.09     |
| 102 | 0.6922 | 1324.128 | 114.19136 | 60.0827  | 5.24784  | -0.03413 | 0.09993  | -1.13568 | 2.22912  | 115.1285 | 10.50132 | 0.01011  | 0.01814 | 1398.476 | 129.66457 | 226.74  | 19.75   | 8.71     |
| 103 | 0.7016 | 289.5699 | 6.09137   | 0.88589  | 0.0425   | 0.47481  | 0.01624  | 48.43334 | 1.3083   | 1.6265   | 0.07807  | 0.00412  | 0.0012  | 149.3997 | 4.92933   | 25.63   | 0.84    | 3.28     |
| 104 | 0.7016 | 101263   | 999212.09 | -5.90287 | 61.68496 | 349.0812 | 3444.584 | 101.8674 | 4.03973  | -10.786  | 112.2456 | 0.7746   | 7.75394 | -1883.15 | 18947.657 | -358.83 | 3994.99 | -1113.34 |
| 105 | 0.7053 | 1456.007 | 52.93496  | 10.34868 | 0.42168  | 1.06984  | 0.04517  | 21.65457 | 0.46628  | 19.12821 | 0.78515  | 0.05153  | 0.00389 | 1149.09  | 42.63914  | 188.34  | 6.64    | 3.53     |
| 106 | 0.7053 | 1282.173 | 1203.8365 | 35.56308 | 33.55109 | 2.85825  | 2.82296  | 65.64649 | 20.21053 | 66.93442 | 64.77441 | -0.08153 | 0.13635 | 451.8086 | 509.9992  | 76.42   | 84.46   | 110.52   |
| 107 | 0.7409 | 178.2151 | 1.47038   | 0.27007  | 0.01011  | 0.12077  | 0.00316  | 20.01575 | 0.49779  | 0.49563  | 0.01855  | 0.00071  | 0.0004  | 142.5474 | 1.47489   | 24.46   | 0.25    | 1.02     |
| 108 | 0.7902 | 243.6736 | 1.84539   | 0.59003  | 0.015    | 0.14086  | 0.00243  | 17.06347 | 0.26515  | 1.08308  | 0.02755  | 0.00134  | 0.00024 | 202.154  | 1.66287   | 34.59   | 0.28    | 0.81     |
| 109 | 0.8727 | 53.12746 | 0.1804    | 0.07748  | 0.00395  | 0.00109  | 5.43748  | 0.60544  | 0.14217  | 0.00725  | 0.00142  | 0.00017  | 0.00017 | 50.21333 | 0.36464   | 8.65    | 0.06    | 0.69     |
| 110 | 0.8982 | 176.2588 | 1.60635   | 0.40041  | 0.01298  | 0.10216  | 0.00354  | 17.11187 | 0.57472  | 0.73491  | 0.02384  | 0.00299  | 0.00058 | 146.1144 | 1.6805    | 25.07   | 0.29    | 1.16     |
| 111 | 0.9064 | 3569.98  | 64.19846  | -0.02611 | 0.03748  | 8.36189  | 0.17076  | 69.21502 | 0.67018  | -0.0479  | 0.06877  | 0.02063  | 0.00442 | 1098.988 | 31.03652  | 180.53  | 4.85    | 2.69     |
| 112 | 0.9265 | 287.892  | 2.31269   | 1.206    | 0.02649  | 0.44789  | 0.00936  | 45.94257 | 0.88765  | 2.21473  | 0.04868  | 0.0109   | 0.00074 | 155.7436 | 2.85077   | 26.71   | 0.49    | 1.83     |
| 113 | 0.9282 | 2148.058 | 91.45805  | 1.07683  | 0.18061  | 2.57676  | 0.12724  | 35.44386 | 0.88784  | 1.97733  | 0.3319   | 0.02482  | 0.00757 | 1387.739 | 62.15018  | 225.1   | 9.48    | 4.21     |
| 114 | 0.9398 | 1127.486 | 17.04417  | 1.30746  | 0.04357  | 3.51846  | 0.06461  | 92.2074  | 0.68162  | 2.40122  | 0.08009  | 0.04     | 0.00234 | 87.9394  | 10.93599  | 15.13   | 1.87    | 1.36     |
| 115 | 0.9399 | 5784.931 | 2613.6449 | 452.7913 | 204.5971 | 14.88953 | 6.77072  | 75.41224 | 3.92178  | 1221.362 | 811.3133 | 0.40361  | 0.23352 | 2091.021 | 1428.3735 | 329.28  | 205.57  | 62.43    |

|    |        |          |           |          |          |          |         |          |          |          |          |          |         |          |           |        |        |       |
|----|--------|----------|-----------|----------|----------|----------|---------|----------|----------|----------|----------|----------|---------|----------|-----------|--------|--------|-------|
| 23 | 0.1831 | 275.6109 | 0.67442   | 0.08419  | 0.00512  | 0.04553  | 0.00142 | 4.87959  | 0.15219  | 0.15449  | 0.0094   | 0.00357  | 0.00021 | 262.1495 | 0.76716   | 42.53  | 0.12   | 0.28  |
| 24 | 0.1842 | 815.1444 | 29.7055   | 12.32663 | 0.48709  | 1.15695  | 0.05761 | 41.81781 | 1.42766  | 22.81629 | 0.9095   | 0.00695  | 0.00057 | 478.4165 | 21.17422  | 76.87  | 3.33   | 4.33  |
| 25 | 0.1863 | 12520.75 | 290.66197 | 9.76678  | 0.25364  | 38.98993 | 0.91042 | 92.01324 | 0.23615  | 18.04517 | 0.47189  | 0.03924  | 0.01263 | 1006.945 | 37.99616  | 158.15 | 5.71   | 3.61  |
| 26 | 0.193  | 1141.666 | 15.93701  | 3.53181  | 0.05786  | 0.7377   | 0.0126  | 19.06896 | 0.18831  | 6.49659  | 0.1067   | 0.00795  | 0.00109 | 926.2486 | 13.14273  | 145.97 | 1.99   | 1.36  |
| 27 | 0.1954 | 1377.058 | 36.21689  | 5.11968  | 0.14601  | 0.40616  | 0.02161 | 8.68535  | 0.40325  | 9.42801  | 0.26986  | 0.00654  | 0.00182 | 1261.991 | 33.7755   | 196.09 | 4.97   | 2.53  |
| 28 | 0.2066 | 166.3912 | 0.94494   | 0.2377   | 0.01528  | 0.41084  | 0.0046  | 72.96305 | 0.72454  | 0.43622  | 0.02805  | 0.00165  | 0.00061 | 44.98662 | 1.24422   | 7.37   | 0.2    | 2.71  |
| 29 | 0.2078 | 516.0179 | 159.5627  | 13.87213 | 0.55257  | 1.31573  | 0.05888 | 75.12882 | 1.79999  | 27.70528 | 0.13045  | 0.53866  | 0.02311 | 129.6021 | 10.62366  | 21.15  | 1.72   | 8.13  |
| 30 | 0.21   | 1298.593 | 32.22635  | 7.784    | 0.2168   | 1.09484  | 0.03037 | 24.86467 | 0.31767  | 14.36152 | 0.4022   | 0.00176  | 0.00311 | 981.0733 | 24.88763  | 154.25 | 3.75   | 2.43  |
| 31 | 0.2103 | 1779.098 | 209.95739 | 131.8513 | 15.57496 | 5.15678  | 0.61762 | 85.0422  | 1.76631  | 266.7692 | 34.74772 | 0.04079  | 0.02307 | 293.4329 | 51.60253  | 47.54  | 8.25   | 17.35 |
| 32 | 0.2113 | 759.1332 | 36.86375  | 2.0949   | 0.17887  | 0.66628  | 0.04163 | 25.91382 | 1.02134  | 3.84956  | 0.32917  | 0.00414  | 0.00532 | 563.2241 | 28.48243  | 90.16  | 4.45   | 4.94  |
| 33 | 0.2212 | 266.4683 | 1.84356   | 2.22294  | 0.02838  | 0.66077  | 0.00616 | 73.21506 | 0.51768  | 4.0852   | 0.05223  | 0.00207  | 0.00057 | 71.47765 | 1.518     | 11.7   | 0.25   | 2.14  |
| 34 | 0.2235 | 1599.949 | 32.01434  | 15.59984 | 0.32539  | 3.85657  | 0.07812 | 71.14917 | 0.22756  | 28.94241 | 0.61042  | 0.01416  | 0.00391 | 466.7321 | 10.14378  | 75.03  | 1.6    | 2.13  |
| 35 | 0.2258 | 2213.81  | 61.50696  | 0.11742  | 0.09053  | 1.35784  | 0.04064 | 18.12424 | 0.20197  | 0.21546  | 0.16614  | 0.00076  | 0.00298 | 1812.7   | 50.56809  | 275.4  | 7.12   | 2.59  |
| 36 | 0.2285 | 1681.725 | 28.12812  | 0.17107  | 0.05928  | 2.40098  | 0.05367 | 52.10241 | 0.44579  | 0.31392  | 0.1088   | 0.00423  | 0.00255 | 652.298  | 14.78533  | 104.02 | 2.29   | 2.20  |
| 37 | 0.2345 | 1204.563 | 11.32255  | 3.11775  | 0.04603  | 1.76767  | 0.01897 | 43.3437  | 0.22578  | 5.73327  | 0.08483  | 0.00824  | 0.00085 | 683.9501 | 7.00331   | 108.91 | 1.08   | 0.99  |
| 38 | 0.2353 | 1822.908 | 126.95739 | 15.00374 | 1.09686  | 1.32387  | 0.10478 | 21.39288 | 0.80913  | 27.82462 | 0.20593  | 0.05855  | 0.00999 | 1448.258 | 103.05155 | 223.31 | 14.94  | 6.69  |
| 39 | 0.2365 | 1249.438 | 49.83042  | 10.91418 | 0.47429  | 0.95591  | 0.05057 | 22.53644 | 0.78822  | 20.18157 | 0.88383  | 0.04568  | 0.00527 | 975.3541 | 40.46378  | 153.39 | 6.1    | 3.98  |
| 40 | 0.2443 | 4112.919 | 37.98421  | 2.86901  | 0.04367  | 13.27215 | 0.1302  | 95.35106 | 0.31942  | 5.27492  | 0.08046  | 0.0061   | 0.00306 | 191.5939 | 13.29082  | 31.18  | 2.14   | 6.86  |
| 41 | 0.2524 | 1884.833 | 17.67049  | 0.2839   | 0.02774  | 1.3834   | 0.01671 | 21.68768 | 0.16558  | 0.52103  | 0.05091  | 0.00076  | 0.00101 | 1476.329 | 14.19718  | 227.38 | 2.05   | 0.90  |
| 42 | 0.2542 | 710.062  | 20.23462  | 23.881   | 0.69439  | 1.42507  | 0.04456 | 59.03101 | 0.76995  | 44.57003 | 1.3182   | 0.01533  | 0.00313 | 295.8834 | 10.24105  | 47.93  | 1.64   | 3.42  |
| 43 | 0.2542 | 1148.304 | 553.35997 | 3.25407  | 3.60927  | 2.80333  | 1.49371 | 72.11837 | 16.44798 | 5.98452  | 6.65306  | 0.05883  | 0.10181 | 320.895  | 244.82928 | 51.92  | 39.05  | 75.21 |
| 44 | 0.2559 | 2871.938 | 54.36065  | 11.3324  | 0.27183  | 8.37521  | 0.16554 | 86.14269 | 0.4929   | 20.96115 | 0.50685  | 0.01851  | 0.00547 | 401.18   | 16.20321  | 64.68  | 2.57   | 3.97  |
| 45 | 0.2584 | 1609.894 | 18.88934  | 0.68187  | 0.09953  | 0.65859  | 0.01656 | 12.08525 | 0.26895  | 1.25173  | 0.18281  | 0.0046   | 0.00287 | 1415.99  | 17.1806   | 218.63 | 2.5    | 1.14  |
| 46 | 0.2857 | 29.46755 | 0.09811   | 0.06731  | 0.00828  | 0.00465  | 0.00159 | 4.65176  | 1.59118  | 0.1235   | 0.01519  | 0.00265  | 0.00022 | 28.07858 | 4.67797   | 4.6    | 0.08   | 1.74  |
| 47 | 0.3058 | 53.68905 | 0.32225   | 0.55918  | 0.01294  | 0.00874  | 0.00171 | 4.72566  | 0.93908  | 0.10263  | 0.02375  | 0.00298  | 0.00028 | 51.1438  | 0.59103   | 8.38   | 0.1    | 1.19  |
| 48 | 0.3062 | 1522.321 | 203.65975 | 20.77454 | 2.90532  | 3.99369  | 0.54942 | 77.411   | 2.49994  | 38.686   | 5.4908   | 0.07006  | 0.02052 | 348.9908 | 61.17365  | 56.4   | 9.73   | 17.25 |
| 49 | 0.3095 | 1148.485 | 20.6608   | 0.17816  | 0.05174  | 0.28731  | 0.01152 | 7.39116  | 0.26491  | 0.32695  | 0.09497  | 0.00909  | 0.00199 | 1063.705 | 19.37965  | 166.66 | 2.9    | 1.74  |
| 50 | 0.3266 | 66.70589 | 0.36832   | 0.27401  | 0.0135   | 0.1003   | 0.0025  | 44.41957 | 1.08414  | 0.50287  | 0.02478  | 0.00184  | 0.00046 | 37.06609 | 0.75501   | 6.07   | 0.12   | 1.98  |
| 51 | 0.3267 | 11600.12 | 3408.5186 | 663.4198 | 194.9646 | 35.95177 | 10.5674 | 91.11179 | 0.73141  | 2290.353 | 1266.427 | 0.19787  | 0.11718 | 1939.932 | 1084.4815 | 293.24 | 151.29 | 51.59 |
| 52 | 0.3281 | 2709.62  | 65.89561  | 9.31509  | 0.27732  | 2.83823  | 0.08032 | 30.92454 | 0.44824  | 17.20509 | 0.51561  | 0.00618  | 0.0046  | 1884.056 | 47.72084  | 285.43 | 6.69   | 2.34  |
| 53 | 0.3313 | 409.3331 | 5.75016   | 1.78828  | 0.07322  | 1.34536  | 0.02263 | 97.09348 | 0.93351  | 3.2854   | 0.1347   | 0.03232  | 0.002   | 11.91152 | 3.83355   | 1.95   | 0.63   | 32.31 |
| 54 | 0.334  | 1760.282 | 26.84469  | 10.02651 | 0.20649  | 1.56174  | 0.03572 | 26.1705  | 0.44708  | 18.52846 | 0.3843   | 0.01958  | 0.0031  | 1308.853 | 21.61343  | 202.98 | 3.17   | 1.56  |
| 55 | 0.3393 | 615.8587 | 6.5203    | 0.11676  | 0.03931  | 0.11331  | 0.00667 | 5.43567  | 0.3149   | 0.21426  | 0.07215  | 0.0111   | 0.00111 | 582.4026 | 6.46514   | 93.15  | 1.01   | 1.08  |
| 56 | 0.372  | 747.7    | 1.57507   | 0.04993  | 0.00532  | 0.03553  | 0.00105 | 1.40369  | 0.04131  | 0.09162  | 0.00977  | 0.00512  | 0.00025 | 737.2013 | 1.58416   | 117.12 | 0.24   | 0.20  |
| 57 | 0.3755 | 2638.354 | 41.25912  | -0.01515 | 0.06505  | 0.97134  | 0.01992 | 10.87932 | 0.14445  | -0.02779 | 0.11936  | 0.00159  | 0.00168 | 2351.268 | 36.96934  | 349.73 | 5      | 1.43  |
| 58 | 0.3777 | 1265.494 | 26.50954  | 21.04342 | 0.46361  | 1.67985  | 0.04319 | 39.08924 | 0.59169  | 39.19426 | 0.87652  | 0.03758  | 0.00422 | 782.4319 | 18.34901  | 124.07 | 2.81   | 2.26  |
| 59 | 0.3847 | 1495.808 | 12.55049  | 6.83118  | 0.06718  | 1.59483  | 0.01513 | 31.46921 | 0.14026  | 12.59504 | 0.12447  | 0.00749  | 0.00095 | 1030.038 | 8.94426   | 161.62 | 1.34   | 0.83  |
| 60 | 0.3902 | 1992.082 | 18.90132  | 1.37294  | 0.04281  | 3.41056  | 0.03473 | 50.58635 | 0.18894  | 2.5216   | 0.07871  | 0.00758  | 0.00169 | 985.3008 | 10.10153  | 154.89 | 1.52   | 0.98  |
| 61 | 0.3968 | 1060.605 | 13.74845  | 3.74029  | 0.05898  | 1.17812  | 0.019   | 32.79609 | 0.31531  | 6.88109  | 0.10879  | 0.01521  | 0.0014  | 714.6358 | 9.87902   | 113.65 | 1.52   | 1.34  |
| 62 | 0.3976 | 3322.831 | 235.55693 | 14.91052 | 1.14658  | 7.83658  | 0.56041 | 69.65452 | 0.66756  | 27.64991 | 2.14883  | 0.00854  | 0.00869 | 1019.051 | 76.42821  | 159.97 | 11.48  | 7.18  |
| 63 | 0.4285 | 103.0073 | 0.37797   | 0.11129  | 0.00698  | 0.21617  | 0.00197 | 62.02317 | 0.51792  | 0.20422  | 0.0128   | 0.00094  | 0.00025 | 39.1107  | 0.55327   | 6.41   | 0.09   | 1.40  |
| 64 | 0.4383 | 359.8429 | 2.27131   | 0.84331  | 0.03197  | 1.0058   | 0.00961 | 82.58314 | 0.59476  | 1.54829  | 0.05873  | 0.00081  | 0.00101 | 62.70552 | 2.17923   | 10.26  | 0.36   | 3.51  |
| 65 | 0.4409 | 1523.777 | 39.30803  | 5.9409   | 0.1796   | 0.95723  | 0.03092 | 18.53148 | 0.36808  | 10.94665 | 0.33233  | 0.01216  | 0.00315 | 1246.605 | 32.76494  | 193.83 | 4.83   | 2.49  |
| 66 | 0.4413 | 3030.601 | 402.88192 | 8.0094   | 1.19398  | 2.78805  | 0.37818 | 27.1635  | 0.73482  | 14.77975 | 2.21579  | 0.01753  | 0.02042 | 2219.919 | 297.65107 | 331.88 | 40.64  | 12.25 |
| 67 | 0.4578 | 176.1343 | 1.46397   | 0.10508  | 0.01882  | 0.49169  | 0.005   | 82.49909 | 0.52703  | 0.19283  | 0.03454  | 0.0116   | 0.00057 | 30.82219 | 0.97787   | 5.05   | 0.16   | 3.17  |
| 68 | 0.4753 | 172.3672 | 0.170155  | 0.34215  | 0.0259   | 0.0582   | 0.00341 | 9.96262  | 0.18534  | 0.62794  | 0.04755  | 0.00136  | 0.00054 | 155.2057 | 1.39864   | 25.3   | 0.23   | 0.91  |
| 69 | 0.4762 | 2390.48  | 154.89242 | 0.08446  | 0.34892  | 4.58561  | 0.3005  | 56.68562 | 0.57123  | 0.15499  | 0.64029  | 0.00299  | 0.00739 | 1035.471 | 68.53323  | 162.43 | 10.28  | 6.33  |
| 70 | 0.4775 | 908.4437 | 35.37175  | 4.07993  | 0.29739  | 2.78264  | 0.1137  | 90.4801  | 1.14611  | 7.50774  | 0.54882  | 0.00713  | 0.00815 | 86.73002 | 10.99934  | 14.18  | 1.79   | 12.62 |
| 71 | 0.4779 | 5160.061 | 752.59713 | 60.22539 | 8.83964  | 12.50473 | 1.82832 | 71.51471 | 7.5837   | 115.4141 | 17.69252 | 0.35885  | 0.05531 | 1535.143 | 237.4863  | 235.87 | 34.2   | 14.50 |
| 72 | 0.4813 | 293.149  | 5.24194   | 1.41588  | 0.10369  | 0.74543  | 0.01898 | 75.1082  | 1.37812  | 2.60054  | 0.19063  | 0.00476  | 0.00235 | 73.03572 | 4.26418   | 11.95  | 0.7    | 5.86  |
| 73 | 0.4962 | 153.6638 | 0.76186   | 0.77051  | 0.01914  | 0.08476  | 0.00629 | 16.26129 | 0.39593  | 1.41455  | 0.03515  | 0.00082  | 0.00046 | 128.7213 | 0.89546   | 21.01  | 0.15   | 0.71  |
| 74 | 0.5002 | 60.1645  | 0.97571   | 0.48155  | 0.07768  | 0.07941  | 0.00818 | 38.9539  | 3.97006  | 0.88389  | 0.14264  | -0.00086 | 0.00182 | 36.72245 | 2.46284   | 6.02   | 0.4    | 6.64  |
| 75 | 0.5071 | 174.9544 | 1.791     | 0.65151  | 0.03794  | 0.0727   | 0.00383 | 12.25042 | 0.63647  | 1.19598  | 0.06968  | 0.00993  | 0.00114 | 153.5663 | 1.93552   | 25.03  | 0.31   | 1.24  |
| 76 | 0.5128 | 252.1927 | 2.80835   | 0.22447  | 0.04782  | 0.34144  | 0.00774 | 40.00435 | 0.80002  | 0.41194  | 0.08777  | 0.01701  | 0.00136 | 151.3108 | 2.658     | 24.67  | 0.43   | 1.74  |
| 77 | 0.5133 | 1347.272 | 124.08146 | 2.48543  | 0.69629  | 1.62766  | 0.16217 | 35.68548 | 1.36213  | 4.56844  | 1.28208  | 0.02602  | 0.01575 | 867.9958 | 82.19716  | 137.13 | 12.5   | 9.12  |
| 78 | 0.5249 | 1502.111 | 10.17518  | -0.00631 | 0.02938  | 0.17353  | 0.0042  | 3.41385  | 0.07938  | -0.01157 | 0.05391  | -0.00014 | 0.00065 |          |           |        |        |       |

|     |        |          |           |          |          |          |          |          |         |          |          |         |         |          |           |        |        |        |
|-----|--------|----------|-----------|----------|----------|----------|----------|----------|---------|----------|----------|---------|---------|----------|-----------|--------|--------|--------|
| 114 | 0.8979 | 4858.692 | 246.39144 | 11.07906 | 0.61515  | 13.58969 | 0.69456  | 82.63261 | 0.52774 | 20.48886 | 1.14659  | 0.07189 | 0.0084  | 850.4774 | 50.58282  | 134.47 | 7.71   | 5.73   |
| 115 | 0.9187 | 135.8606 | 0.53866   | 0.22537  | 0.01212  | 0.28884  | 0.00243  | 62.82371 | 0.50132 | 0.41359  | 0.02225  | 0.0053  | 0.00031 | 50.50492 | 0.73528   | 8.27   | 0.12   | 1.45   |
| 116 | 0.9349 | 89.59666 | 0.44628   | 0.47458  | 0.01839  | 0.16564  | 0.00202  | 54.60585 | 0.62626 | 0.87109  | 0.03376  | 0.0023  | 0.0005  | 40.6718  | 0.60377   | 6.66   | 0.1    | 1.50   |
| 117 | 0.9666 | 86.87313 | 0.29957   | 0.01772  | 0.00662  | 0.15464  | 0.00168  | 52.61702 | 0.56317 | 0.03251  | 0.01215  | 0.00037 | 0.0002  | 41.14952 | 0.52368   | 6.74   | 0.09   | 1.34   |
| 118 | 0.9821 | 318.5549 | 2.36782   | 0.67671  | 0.0154   | 0.46372  | 0.00508  | 43.00211 | 0.34755 | 1.24226  | 0.02829  | 0.00343 | 0.00048 | 181.6395 | 1.7491    | 29.57  | 0.28   | 0.95   |
| 119 | 0.9958 | 601.1579 | 4.08008   | 0.46357  | 0.02406  | 0.05674  | 0.00238  | 2.78263  | 0.11558 | 0.85086  | 0.04418  | 0.00087 | 0.00045 | 584.5924 | 4.02989   | 93.5   | 0.63   | 0.67   |
| 120 | 1      | 107.9446 | 1.53735   | 0.62385  | 0.05264  | 0.21307  | 0.00759  | 58.29767 | 1.90862 | 1.14518  | 0.09668  | 0.00116 | 0.00151 | 45.02287 | 2.16172   | 7.38   | 0.35   | 4.74   |
| 121 | 1      | 14872.52 | 6548.1979 | 951.4101 | 418.9386 | 49.66337 | 21.87019 | 98.14822 | 0.87501 | 5320.651 | 7140.702 | -0.0145 | 0.17536 | 839.3983 | 1194.4354 | 132.78 | 182.14 | 137.17 |

Integrated 506.9859 0.42252 1.55603 0.00325 0.61024 0.00083 35.5453 0.03872 2.85824 0.00598 0.00434 0.00009 327.1166 0.33747 52.91 0.31 0.59

# WILLOW CREEK

Weighted average of J from standards = 1.347e-04 2.749e-06

| Grain # | Cumulative 40Ar/39Ar meas. |          |           | 37Ar/39Ar meas. | 36Ar/39Ar meas. | % Atm.   | Ca/K    | Cl/K     | 40*/39K  |          |          | Age (Ma) | (Ma)    | %error   |           |         |        |         |
|---------|----------------------------|----------|-----------|-----------------|-----------------|----------|---------|----------|----------|----------|----------|----------|---------|----------|-----------|---------|--------|---------|
| 10      | 0.0007                     | 69.35314 | 47.20833  | 2.63658         | 2.54457         | 0.67511  | 0.52607 | 287.4626 | 110.7892 | 4.84678  | 4.68637  | 0.12847  | 0.12934 | -130.198 | 116.99245 | -31.89  | 28.91  | -90.66  |
| 11      | 0.0111                     | 128.5308 | 5.13665   | 0.55212         | 0.09952         | 0.07254  | 0.01231 | 16.64582 | 2.75311  | 1.01346  | 0.18275  | 0.00331  | 0.00367 | 107.1528 | 5.56133   | 25.82   | 1.33   | 5.15    |
| 12      | 0.0165                     | 710.5426 | 60.70274  | 4.10851         | 0.41974         | 1.32965  | 0.12145 | 55.25183 | 1.79534  | 7.56048  | 0.77465  | 0.01207  | 0.00623 | 318.8667 | 30.1887   | 75.79   | 7.03   | 9.28    |
| 13      | 0.0386                     | 685.0458 | 17.96256  | 0.54278         | 0.052           | 0.0951   | 0.00793 | 4.09602  | 0.32511  | 0.99631  | 0.09549  | 0.00613  | 0.00137 | 657.2097 | 17.38851  | 152.86  | 3.88   | 2.54    |
| 14      | 0.045                      | 793.2516 | 60.23771  | 1.65049         | 0.23094         | 0.46373  | 0.04405 | 17.25809 | 0.98737  | 3.03196  | 0.42473  | 0.02499  | 0.00727 | 657.0929 | 50.57769  | 152.84  | 11.28  | 7.38    |
| 15      | 0.0513                     | 723.2085 | 51.23069  | 3.01542         | 0.31067         | 1.40183  | 0.11387 | 57.24615 | 2.28249  | 5.54469  | 0.57248  | 0.03835  | 0.00693 | 309.8467 | 27.54123  | 73.69   | 6.42   | 8.71    |
| 16      | 0.0916                     | 108.5376 | 1.78683   | 0.16169         | 0.03661         | -0.00441 | 0.00412 | -1.21232 | 1.12235  | 0.29671  | 0.06719  | 0.00242  | 0.00168 | 109.8359 | 2.18043   | 26.47   | 0.52   | 1.96    |
| 17      | 0.1192                     | 462.8663 | 617.01591 | 2.66962         | 5.49612         | 0.86661  | 1.21257 | 55.28143 | 23.52831 | 4.90764  | 10.12276 | 0.06423  | 0.16496 | 207.3649 | 297.70253 | 49.65   | 70.3   | 141.59  |
| 18      | 0.155                      | 308.3924 | 14.83469  | 2.2051          | 0.12158         | 0.14196  | 0.00929 | 13.54442 | 0.60504  | 4.05236  | 0.22378  | 0.01785  | 0.00424 | 267.0126 | 13.006    | 63.68   | 3.05   | 4.79    |
| 19      | 0.1958                     | 106.6556 | 1.94242   | 0.25102         | 0.03856         | 0.0176   | 0.00614 | 4.85721  | 1.6991   | 0.46068  | 0.07077  | 0.005    | 0.00204 | 101.4649 | 2.58922   | 24.46   | 0.62   | 2.53    |
| 20      | 0.2847                     | 129.4582 | 1.41026   | 0.09923         | 0.01944         | 0.02395  | 0.00241 | 5.46214  | 0.54778  | 0.18209  | 0.03568  | 0.00188  | 0.0008  | 122.3675 | 1.51243   | 29.46   | 0.36   | 1.22    |
| 21      | 0.2996                     | 498.028  | 29.19474  | 0.42506         | 0.10489         | 0.13991  | 0.01729 | 8.29464  | 0.90377  | 0.78017  | 0.19258  | 0.01514  | 0.00448 | 456.8283 | 27.16774  | 107.61  | 6.21   | 5.77    |
| 22      | 0.3081                     | 63.51022 | 5.70933   | 3.96522         | 0.39994         | 0.03265  | 0.02083 | 14.68399 | 9.59906  | 7.29606  | 0.73796  | 0.00052  | 0.00783 | 54.31121 | 7.83263   | 13.14   | 1.89   | 14.38   |
| 23      | 0.3221                     | 988.9918 | 53.01212  | 1.26423         | 0.14572         | 0.63542  | 0.03836 | 18.97562 | 0.52974  | 2.32176  | 0.26786  | 0.0523   | 0.00724 | 802.0164 | 43.36228  | 184.87  | 9.5    | 5.14    |
| 24      | 0.3257                     | 821.9612 | 184.38382 | 1.61852         | 0.60244         | 0.05054  | 0.07425 | 1.80091  | 2.63817  | 2.97317  | 1.10792  | -0.01587 | 0.0216  | 808.053  | 182.77229 | 186.19  | 40.01  | 21.49   |
| 25      | 0.3268                     | 1321.586 | 1033.3325 | 0.34039         | 1.63847         | 0.31088  | 0.31346 | 6.94915  | 4.42557  | 0.62473  | 3.00782  | -0.04051 | 0.07083 | 1230.015 | 963.76761 | 276.27  | 200.7  | 72.65   |
| 26      | 0.3554                     | 442.3732 | 15.01065  | 0.35818         | 0.062           | 0.11477  | 0.00715 | 7.66005  | 0.40083  | 0.65738  | 0.11383  | 0.00014  | 0.00266 | 408.5631 | 13.98433  | 96.54   | 3.22   | 3.34    |
| 27      | 0.3868                     | 127.3777 | 3.24368   | 0.03999         | 0.05421         | 0.01532  | 0.00642 | 3.55124  | 1.48716  | 0.07337  | 0.09948  | -0.00391 | 0.00219 | 122.829  | 3.65789   | 29.57   | 0.87   | 2.94    |
| 28      | 0.3978                     | 624.6727 | 37.78519  | 1.1536          | 0.15298         | 0.14781  | 0.01754 | 6.9772   | 0.71411  | 2.11842  | 0.28116  | 0.01622  | 0.00384 | 581.5343 | 35.49145  | 135.91  | 7.99   | 5.88    |
| 29      | 0.4419                     | 113.7673 | 1.91513   | 0.55065         | 0.0341          | 0.1111   | 0.00475 | 28.82375 | 1.13602  | 1.01076  | 0.06262  | 0.00267  | 0.00125 | 80.98562 | 1.88481   | 19.55   | 0.45   | 2.30    |
| 30      | 0.4634                     | 846.0103 | 27.94471  | 0.13806         | 0.0768          | 0.13378  | 0.00977 | 4.67175  | 0.30456  | 0.25334  | 0.14095  | -0.00046 | 0.00297 | 806.5371 | 26.77198  | 185.86  | 5.86   | 3.15    |
| 31      | 0.544                      | 113.4391 | 1.03015   | 0.18346         | 0.01792         | 0.01443  | 0.00146 | 3.74628  | 0.37896  | 0.33668  | 0.03289  | 0.00063  | 0.00059 | 109.175  | 1.0828    | 26.31   | 0.26   | 0.99    |
| 32      | 0.6367                     | 120.8563 | 2.00554   | 0.22007         | 0.03596         | 0.02392  | 0.00301 | 5.83387  | 0.73034  | 0.40387  | 0.066    | 0.00234  | 0.00123 | 113.7954 | 2.08726   | 27.41   | 0.5    | 1.82    |
| 33      | 0.6636                     | 521.3467 | 19.58025  | 0.88845         | 0.09427         | 0.0653   | 0.00817 | 3.68749  | 0.44178  | 1.6312   | 0.17319  | 0.01079  | 0.00241 | 502.4088 | 19.02478  | 118.01  | 4.33   | 3.67    |
| 34      | 0.7143                     | 126.1271 | 1.69001   | 0.33207         | 0.03924         | 0.01812  | 0.00446 | 4.22487  | 1.04341  | 0.60944  | 0.07204  | 0.00094  | 0.00112 | 120.7983 | 2.08934   | 29.09   | 0.5    | 1.72    |
| 35      | 0.7153                     | 1636.638 | 1044.2371 | 5.18271         | 3.76131         | 3.03224  | 1.94975 | 54.72281 | 4.37356  | 9.54449  | 6.95229  | -0.05359 | 0.08302 | 743.7325 | 481.68952 | 172.05  | 106.28 | 61.77   |
| 36      | 0.7522                     | 113.1356 | 2.03291   | 0.04808         | 0.05804         | -0.00869 | 0.00529 | -2.27345 | 1.38025  | 0.08823  | 0.1065   | -0.00504 | 0.0022  | 115.6812 | 2.59982   | 27.86   | 0.62   | 2.23    |
| 37      | 0.7694                     | 239.4363 | 11.01387  | -0.14411        | 0.10563         | 0.27883  | 0.01586 | 34.42118 | 1.15283  | -0.2644  | 0.19378  | -0.00755 | 0.00366 | 156.984  | 7.73488   | 37.71   | 1.84   | 4.88    |
| 38      | 0.8045                     | 452.7337 | 9.24364   | 1.53122         | 0.067           | 1.09228  | 0.02354 | 71.27027 | 0.52787  | 2.81262  | 0.12321  | 0.0012   | 0.00219 | 130.2014 | 3.62215   | 31.33   | 0.86   | 2.74    |
| 39      | 0.8692                     | 122.2889 | 1.30539   | -0.00161        | 0.02712         | 0.03366  | 0.00274 | 8.13525  | 0.65564  | -0.00296 | 0.04975  | -0.00206 | 0.00112 | 112.3129 | 1.44416   | 27.06   | 0.35   | 1.29    |
| 40      | 0.9347                     | 131.5191 | 1.72854   | 0.15483         | 0.03313         | 0.01525  | 0.00381 | 3.41773  | 0.8549   | 0.28413  | 0.0608   | -0.00022 | 0.00108 | 127.0093 | 2.01405   | 30.57   | 0.48   | 1.57    |
| 41      | 0.9965                     | 455.3441 | 7.11621   | 0.16268         | 0.03835         | 0.09227  | 0.00494 | 5.98512  | 0.30677  | 0.29853  | 0.07038  | 0.01211  | 0.00112 | 428.1125 | 6.83685   | 101.04  | 1.57   | 1.55    |
| 42      | 0.9959                     | -892.836 | 1326.7233 | -2.26672        | 4.8904          | -1.24598 | 1.89456 | 41.21556 | 13.30419 | -4.15246 | 8.94456  | 0.16142  | 0.27383 | -524.027 | 786.41007 | -131.92 | 205.39 | -155.69 |
| 43      | 1                          | 927.9873 | 174.46443 | 4.12789         | 0.93131         | 0.3215   | 0.07702 | 10.20123 | 1.5207   | 7.59626  | 1.71883  | 0.00072  | 0.01971 | 835.7309 | 158.2224  | 192.24  | 34.52  | 17.96   |

Integrated 262.8603 9.76922 0.53871 0.118 0.14219 0.01155 15.96918 1.15424 0.98884 0.21667 0.00647 0.00388 220.9428 8.75843 52.85 2.32 4.39

# LIME CREEK

Weighted average of J from standards = 1.347e-04 2.749e-06

| Grain # | Cumulative 40Ar/39Ar |          | 37Ar/39Ar | 36Ar/39Ar | % Atm.   | Ca/K    | Cl/K    | 40*/39K  |          | Age      | %error   |          |         |          |           |        |        |       |
|---------|----------------------|----------|-----------|-----------|----------|---------|---------|----------|----------|----------|----------|----------|---------|----------|-----------|--------|--------|-------|
|         | 39Ar                 | meas.    | meas.     | meas.     | 40Ar     |         |         |          |          | (Ma)     | (Ma)     |          |         |          |           |        |        |       |
| 1       | 0.0378               | 365.0054 | 1.26872   | 0.27066   | 0.00895  | 0.13522 | 0.00171 | 10.94156 | 0.13281  | 0.49672  | 0.01643  | 0.0028   | 0.00035 | 325.1038 | 1.23116   | 77.24  | 0.29   | 0.38  |
| 2       | 0.0537               | 970.2882 | 12.13631  | 1.56625   | 0.03904  | 0.20685 | 0.00458 | 6.28634  | 0.11529  | 2.87704  | 0.07179  | 0.00979  | 0.00164 | 910.2716 | 11.45406  | 208.43 | 2.48   | 1.19  |
| 3       | 0.0585               | 998.8869 | 24.48847  | 1.06564   | 0.06663  | 0.28125 | 0.01601 | 8.31167  | 0.42775  | 1.95678  | 0.12244  | 0.01903  | 0.00336 | 916.5252 | 22.89834  | 209.78 | 4.95   | 2.36  |
| 4       | 0.07                 | 163.8117 | 1.80695   | 0.8169    | 0.02638  | 0.12889 | 0.006   | 23.2142  | 1.05321  | 1.49977  | 0.04847  | 0.00637  | 0.00096 | 125.8339 | 2.21843   | 30.29  | 0.53   | 1.75  |
| 5       | 0.0856               | 512.6564 | 4.49165   | 1.56853   | 0.03722  | 0.15375 | 0.00552 | 8.83732  | 0.3089   | 2.88122  | 0.06845  | 0.00696  | 0.00085 | 467.8425 | 4.39995   | 110.13 | 1      | 0.91  |
| 6       | 0.0896               | 511.3836 | 12.9627   | 0.29267   | 0.23052  | 0.26961 | 0.01411 | 15.44632 | 0.72529  | 15.30554 | 4.2797   | 0.02615  | 0.00255 | 434.9157 | 11.17026  | 102.6  | 2.56   | 2.50  |
| 7       | 0.0922               | 980.6165 | 48.21592  | 12.59264  | 0.63542  | 0.26256 | 0.02501 | 7.80644  | 0.64586  | 23.31308 | 1.18692  | 0.00645  | 0.00449 | 912.1499 | 45.70962  | 208.84 | 9.88   | 4.73  |
| 8       | 0.1002               | 566.2394 | 12.80834  | 4.42414   | 0.11581  | 0.12908 | 0.00712 | 6.67207  | 0.3392   | 8.14312  | 0.21382  | 0.00461  | 0.00134 | 530.0881 | 12.18867  | 124.29 | 2.76   | 2.22  |
| 9       | 0.1006               | 1154.1   | 317.48507 | 210.1607  | 57.82687 | 3.67977 | 1.01984 | 92.71925 | 3.1943   | 452.8232 | 146.3123 | -0.01951 | 0.03905 | 98.66666 | 53.78175  | 23.79  | 12.88  | 54.14 |
| 10      | 0.1039               | 290.22   | 10.65757  | 0.83583   | 0.11845  | 0.56981 | 0.0288  | 58.00027 | 2.01933  | 1.53454  | 0.21759  | 0.00659  | 0.00609 | 121.9511 | 7.38743   | 29.36  | 1.76   | 5.9   |
| 11      | 0.1076               | 160.7222 | 1.72832   | 0.29277   | 0.09417  | 0.08396 | 0.01315 | 15.42406 | 2.32109  | 0.5373   | 0.17286  | 0.00869  | 0.00425 | 135.9353 | 7.09653   | 32.7   | 1.69   | 5.17  |
| 12      | 0.1098               | 1310.855 | 89.90947  | 6.36141   | 0.45532  | 0.10412 | 0.02067 | 2.30711  | 0.4373   | 11.72499 | 0.84301  | 0.03505  | 0.00686 | 1286.362 | 88.81869  | 287.97 | 18.38  | 6.38  |
| 13      | 0.1139               | 405.9066 | 14.22275  | 2.58463   | 0.14481  | 0.15784 | 0.01675 | 11.43894 | 1.15156  | 4.75111  | 0.26668  | 0.0129   | 0.00422 | 360.1062 | 13.48851  | 85.36  | 3.12   | 3.66  |
| 14      | 0.1141               | 2739.825 | 1528.3074 | 7.19551   | 4.40313  | 3.81454 | 2.13686 | 41.12003 | 2.12332  | 3.12702  | 8.16188  | 0.16921  | 0.11854 | 1621.43  | 910.97882 | 355.99 | 181.49 | 50.98 |
| 15      | 0.1183               | 253.4495 | 13.29266  | 1.23532   | 0.12417  | 0.44758 | 0.0253  | 52.14975 | 1.11444  | 2.26862  | 0.22823  | 0.06278  | 0.00507 | 121.3679 | 6.98398   | 29.22  | 1.67   | 5.72  |
| 16      | 0.1352               | 483.8097 | 7.22436   | 1.15791   | 0.03218  | 0.07396 | 0.00399 | 4.49811  | 0.23434  | 2.12635  | 0.05915  | 0.00252  | 0.00122 | 462.3972 | 7.00343   | 108.89 | 1.6    | 1.47  |
| 17      | 0.1463               | 954.2273 | 17.95927  | 1.30994   | 0.05935  | 0.12258 | 0.00814 | 3.78469  | 0.24182  | 2.40578  | 0.1091   | 0.01247  | 0.00183 | 918.9344 | 17.46526  | 210.3  | 3.77   | 1.79  |
| 18      | 0.1486               | 1390.253 | 94.53102  | 14.02565  | 0.98004  | 1.61452 | 0.11787 | 34.23448 | 0.91615  | 25.9926  | 1.8344   | 0.00981  | 0.00824 | 923.4348 | 64.73082  | 211.27 | 13.97  | 6.61  |
| 19      | 0.1504               | 774.0578 | 53.46043  | 15.00715  | 1.05415  | 1.08331 | 0.08106 | 11.19755 | 1.1968   | 27.83102 | 1.97588  | 0.05005  | 0.00957 | 460.0231 | 33.47095  | 108.34 | 7.65   | 7.06  |
| 20      | 0.1565               | 167.3603 | 5.88021   | 0.57449   | 0.05758  | 0.15113 | 0.01495 | 26.66087 | 2.46863  | 1.05453  | 0.10573  | 0.00821  | 0.00425 | 122.7686 | 5.98025   | 29.56  | 1.43   | 4.84  |
| 21      | 0.1663               | 196.3889 | 2.7077    | 2.80439   | 0.05283  | 0.32368 | 0.008   | 48.59335 | 1.01208  | 5.15589  | 0.09733  | 0.00589  | 0.00187 | 101.1421 | 2.45374   | 24.39  | 0.59   | 2.42  |
| 22      | 0.1834               | 1698.598 | 19.71237  | 0.03891   | 0.02073  | 0.27813 | 0.00671 | 4.83842  | 0.10237  | 0.0714   | 0.03804  | 0.00151  | 0.00111 | 1616.429 | 18.84092  | 355    | 3.76   | 1.06  |
| 23      | 0.1869               | 1423.76  | 68.85224  | 0.31042   | 0.10055  | 0.95888 | 0.04862 | 19.90011 | 0.30573  | 0.5697   | 0.18458  | 0.01404  | 0.00487 | 1140.656 | 55.35855  | 257.57 | 11.65  | 4.52  |
| 24      | 0.1906               | 531.3928 | 18.11341  | 15.63533  | 0.55259  | 1.30477 | 0.04968 | 72.31808 | 1.23604  | 29.00899 | 1.0367   | 0.12196  | 0.00641 | 148.7339 | 8.39844   | 35.75  | 2      | 5.59  |
| 25      | 0.1912               | 414.4675 | 100.32813 | 0.70698   | 0.64937  | 1.09453 | 0.31109 | 78.02729 | 11.70548 | 1.29785  | 1.1927   | 0.05242  | 0.03299 | 91.10871 | 53.40474  | 21.98  | 12.81  | 58.28 |
| 26      | 0.2033               | 1378.201 | 19.68914  | 0.05717   | 0.02345  | 0.09774 | 0.00725 | 2.0953   | 0.1525   | 0.10489  | 0.04304  | 0.0023   | 0.00156 | 1349.349 | 19.3927   | 300.96 | 3.98   | 1.32  |
| 27      | 0.2045               | 772.0535 | 75.38325  | 5.82956   | 0.66376  | 0.85465 | 0.11304 | 32.65044 | 2.92255  | 10.74066 | 1.128    | 0.01781  | 0.01341 | 522.1042 | 56.00758  | 122.48 | 12.7   | 10.37 |
| 28      | 0.205                | 261.2234 | 73.4209   | 13.18869  | 3.74241  | 0.02492 | 0.19869 | 2.40288  | 22.46442 | 24.24694 | 6.99654  | 0.0309   | 0.04088 | 257.3144 | 94.02097  | 6.14   | 22.06  | 35.93 |
| 29      | 0.2105               | 191.967  | 4.49056   | 2.27337   | 0.08236  | 0.2332  | 0.02011 | 35.80465 | 2.98394  | 4.17804  | 0.15161  | 0.0025   | 0.00292 | 123.413  | 6.43447   | 29.71  | 1.54   | 5.18  |
| 30      | 0.2167               | 166.8499 | 4.30939   | 2.19355   | 0.07533  | 0.15611 | 0.01518 | 27.54412 | 2.59439  | 4.0311   | 0.13864  | 0.00259  | 0.00306 | 121.0586 | 5.357     | 29.15  | 1.28   | 4.39  |
| 31      | 0.2185               | 570.4939 | 44.71909  | 0.80915   | 0.15469  | 0.75083 | 0.07308 | 38.88149 | 2.24583  | 1.48552  | 0.28416  | 0.02531  | 0.00707 | 348.8586 | 30.22476  | 82.75  | 7.01   | 8.47  |
| 32      | 0.2263               | 174.0544 | 3.28688   | 1.29407   | 0.04094  | 0.09321 | 0.00921 | 15.76566 | 1.53618  | 2.37662  | 0.07526  | 0.01929  | 0.00173 | 146.7226 | 3.85712   | 35.27  | 0.92   | 2.61  |
| 33      | 0.2423               | 161.5629 | 1.31715   | 0.71673   | 0.01694  | 0.18155 | 0.00446 | 33.17532 | 0.77485  | 1.31577  | 0.03056  | 0.00955  | 0.00078 | 107.9888 | 1.54708   | 26.03  | 0.37   | 1.42  |

|    |        |          |           |          |          |          |          |          |         |          |          |          |         |          |           |        |        |       |
|----|--------|----------|-----------|----------|----------|----------|----------|----------|---------|----------|----------|----------|---------|----------|-----------|--------|--------|-------|
| 34 | 0.2435 | 4375.771 | 1274.8892 | 375.687  | 109.4651 | 11.19579 | 3.26477  | 74.89892 | 0.93154 | 938.2723 | 372.1153 | 0.07959  | 0.04876 | 1495.01  | 595.49327 | 330.63 | 120.32 | 36.39 |
| 35 | 0.2468 | 1141.589 | 54.36339  | 6.46794  | 0.32714  | 0.52089  | 0.04014  | 13.43683 | 0.81756 | 11.92223 | 0.60577  | 0.01267  | 0.00466 | 992.7047 | 48.41836  | 226.17 | 10.37  | 4.59  |
| 36 | 0.2589 | 130.8115 | 2.33799   | 0.11364  | 0.01707  | 0.06202  | 0.00487  | 14.00522 | 1.07087 | 0.20853  | 0.03133  | 0.0009   | 0.0012  | 112.4745 | 2.4517    | 27.1   | 0.59   | 2.18  |
| 37 | 0.2596 | 297.779  | 77.57507  | 0.93067  | 0.51786  | 0.20473  | 0.73543  | 72.95261 | 8.47835 | 1.70858  | 0.95146  | 0.04266  | 0.02861 | 80.58637 | 32.62072  | 19.46  | 7.83   | 40.24 |
| 38 | 0.2656 | 790.8586 | 31.22     | 1.14135  | 0.09826  | 0.07978  | 0.01265  | 2.96897  | 0.45789 | 2.09592  | 0.18058  | 0.00101  | 0.00314 | 767.9685 | 30.55947  | 177.39 | 6.72   | 3.79  |
| 39 | 0.2666 | 1945.06  | 353.12987 | 61.14316 | 11.11517 | 1.09106  | 0.2146   | 16.3169  | 1.25475 | 117.2523 | 22.27714 | 0.01602  | 0.01723 | 1701.118 | 323.79536 | 371.8  | 63.95  | 17.20 |
| 40 | 0.2734 | 221.2943 | 6.96797   | 0.39349  | 0.06781  | 0.25932  | 0.01803  | 34.61704 | 2.14867 | 0.72219  | 0.12449  | 0.01161  | 0.00259 | 144.7096 | 6.59397   | 34.79  | 1.57   | 4.51  |
| 41 | 0.2819 | 169.0155 | 3.89624   | 0.81141  | 0.04157  | 0.18146  | 0.01071  | 31.69178 | 1.72483 | 1.48968  | 0.07636  | 0.00325  | 0.00203 | 115.4974 | 3.95453   | 27.82  | 0.95   | 3.41  |
| 42 | 0.2875 | 2101.226 | 97.05237  | 0.08585  | 0.07249  | 0.62436  | 0.03178  | 8.78033  | 0.18795 | 0.15753  | 0.13303  | 0.0262   | 0.00422 | 1916.821 | 88.63039  | 413.9  | 17.1   | 4.13  |
| 43 | 0.2886 | 4075.395 | 1039.1467 | -0.18787 | 0.42961  | 9.19969  | 2.34804  | 66.70628 | 0.7676  | -0.34466 | 0.78807  | 0.03412  | 0.02141 | 1356.661 | 347.32371 | 302.46 | 71.28  | 23.57 |
| 44 | 0.2897 | 1774.953 | 453.74951 | 16.56114 | 4.26576  | 3.78807  | 0.97208  | 62.98915 | 1.42255 | 30.74702 | 8.01343  | 0.05987  | 0.02157 | 664.6882 | 173.84633 | 154.53 | 38.73  | 25.06 |
| 45 | 0.3036 | 1341.566 | 29.55177  | 0.02837  | 0.03299  | 0.04231  | 0.00384  | 0.93187  | 0.08204 | 0.05206  | 0.06054  | 0.00131  | 0.00123 | 1329.062 | 29.29834  | 296.78 | 6.03   | 2.03  |
| 46 | 0.3044 | 12581.2  | 4411.9272 | -0.23343 | 0.59789  | 31.10038 | 10.90686 | 73.04713 | 0.29089 | -0.42823 | 1.09668  | 0.11936  | 0.05236 | 3390.427 | 1189.3244 | 677.89 | 198.19 | 29.24 |
| 47 | 0.3122 | 1598.95  | 53.53452  | -0.01287 | 0.06093  | 0.11744  | 0.01019  | 2.17057  | 0.17372 | -0.02361 | 0.11179  | 0.00258  | 0.0024  | 1564.201 | 52.44538  | 344.56 | 10.52  | 3.05  |
| 48 | 0.3132 | 1814.649 | 574.03596 | 3.98994  | 1.37416  | 0.20068  | 0.08423  | 3.24983  | 0.90149 | 7.34168  | 2.53566  | 0.0239   | 0.02042 | 1760.608 | 558.76587 | 383.51 | 109.64 | 28.59 |
| 49 | 0.3409 | 819.4093 | 6.86695   | 0.17865  | 0.01587  | 0.06681  | 0.00323  | 2.40757  | 0.11474 | 0.32783  | 0.02913  | 0.00172  | 0.00058 | 799.7534 | 6.76923   | 184.37 | 1.48   | 0.80  |
| 50 | 0.3597 | 520.6984 | 6.31215   | 0.89414  | 0.02593  | 0.07897  | 0.00495  | 4.46772  | 0.2759  | 1.64166  | 0.04763  | 0.01053  | 0.00075 | 497.721  | 6.20678   | 116.94 | 1.41   | 1.21  |
| 51 | 0.3706 | 299.9338 | 6.48678   | 4.66804  | 0.11668  | 0.1593   | 0.00746  | 15.56746 | 0.65293 | 8.59354  | 0.21551  | 0.00442  | 0.0016  | 254.0543 | 5.85638   | 60.64  | 1.37   | 2.26  |
| 52 | 0.3813 | 161.7208 | 5.07787   | 1.7695   | 0.07914  | 0.15625  | 0.00989  | 28.46457 | 1.56981 | 3.25085  | 0.14558  | 0.01169  | 0.00176 | 115.8111 | 4.44282   | 27.9   | 1.06   | 3.80  |
| 53 | 0.3878 | 1372.377 | 57.25774  | 0.01904  | 0.06789  | 0.09571  | 0.01261  | 2.06073  | 0.25749 | 0.03493  | 0.12458  | -0.00022 | 0.00343 | 1344.085 | 56.19071  | 299.87 | 11.55  | 3.85  |
| 54 | 0.3967 | 1370.296 | 40.50981  | 0.06145  | 0.07553  | 0.26855  | 0.01649  | 5.79087  | 0.31181 | 0.11275  | 0.13859  | 0.003    | 0.00236 | 1290.972 | 38.40614  | 288.92 | 7.94   | 2.75  |
| 55 | 0.4216 | 365.9436 | 3.65491   | 0.19825  | 0.01706  | 0.04835  | 0.00412  | 3.98983  | 0.33007 | 0.36382  | 0.03132  | 0.00154  | 0.00107 | 351.6932 | 3.71548   | 83.41  | 0.86   | 1.03  |
| 56 | 0.4273 | 1148.475 | 48.97108  | 0.15105  | 0.08618  | 0.13779  | 0.01539  | 3.5443   | 0.36613 | 0.27719  | 0.15816  | -0.00459 | 0.00422 | 1107.859 | 47.43599  | 250.66 | 10.02  | 4.00  |
| 57 | 0.4286 | 238.8956 | 50.1697   | 8.75706  | 1.8844   | 0.31566  | 0.09273  | 38.7482  | 8.03963 | 16.16799 | 3.50078  | -0.01062 | 0.01853 | 147.2203 | 36.66445  | 35.39  | 8.73   | 24.67 |
| 58 | 0.4294 | 4064.118 | 1221.1069 | 0.64884  | 0.53958  | 7.35115  | 2.21105  | 53.44894 | 0.74991 | 1.19107  | 0.99096  | 0.05487  | 0.03183 | 1892.743 | 569.80551 | 409.25 | 110.22 | 26.93 |
| 59 | 0.4463 | 1454.43  | 26.65769  | 1.36739  | 0.03572  | 0.1682   | 0.00534  | 3.40978  | 0.0887  | 2.5114   | 0.06566  | -0.00097 | 0.00156 | 1406.166 | 25.83119  | 312.59 | 5.27   | 1.69  |
| 60 | 0.4485 | 1505.601 | 182.07957 | 0.17516  | 0.19791  | 1.62794  | 0.2033   | 31.95088 | 0.9981  | 0.32143  | 0.36323  | 0.00293  | 0.01088 | 1024.655 | 124.85351 | 232.99 | 26.63  | 11.43 |
| 61 | 0.4534 | 1419.054 | 84.66844  | 0.19777  | 0.09372  | 0.83403  | 0.05368  | 17.36679 | 0.41939 | 0.36293  | 0.17201  | 0.00896  | 0.00386 | 1172.749 | 70.23763  | 264.31 | 14.72  | 5.57  |
| 62 | 0.4608 | 1000.066 | 43.24086  | 5.4045   | 0.24696  | 0.32001  | 0.01689  | 9.41127  | 0.28627 | 9.95452  | 0.45661  | 0.00939  | 0.00265 | 909.3911 | 39.57711  | 208.24 | 8.56   | 4.11  |
| 63 | 0.4692 | 494.418  | 16.79206  | 5.17195  | 0.19057  | 0.12109  | 0.04203  | 72.24186 | 0.5489  | 9.5246   | 0.35223  | 0.00495  | 0.00292 | 137.7361 | 5.44897   | 33.13  | 1.3    | 3.92  |
| 64 | 0.4738 | 1415.674 | 98.50903  | -0.18021 | 0.11129  | 0.13383  | 0.01768  | 2.79463  | 0.31385 | -0.33061 | 0.20415  | -0.00082 | 0.00652 | 1375.907 | 95.83736  | 306.4  | 19.63  | 6.41  |
| 65 | 0.4882 | 148.497  | 3.23031   | 0.60151  | 0.03304  | 0.19439  | 0.00596  | 38.65658 | 0.83949 | 1.10416  | 0.06067  | 0.00793  | 0.00193 | 91.11363 | 2.34766   | 21.98  | 0.56   | 2.55  |
| 66 | 0.4911 | 2391.013 | 252.58207 | 10.85541 | 1.17007  | 0.96404  | 0.1066   | 11.8771  | 0.38935 | 20.07207 | 2.18022  | 0.01965  | 0.00888 | 2123.282 | 226.2308  | 453.3  | 42.7   | 9.42  |
| 67 | 0.4913 | 1839.887 | 1362.8042 | 22.1019  | 16.51132 | 1.466    | 1.11076  | 23.44642 | 3.75952 | 41.19698 | 31.26437 | 0.06329  | 0.078   | 1430.81  | 1078.9346 | 317.61 | 219.58 | 69.14 |
| 68 | 0.4926 | 1161.08  | 190.47552 | 66.9713  | 11.00747 | 1.73676  | 0.28867  | 43.72686 | 1.18962 | 128.9836 | 22.25231 | 0.05961  | 0.01881 | 685.7957 | 118.99642 | 159.23 | 26.44  | 16.60 |
| 69 | 0.5066 | 794.3968 | 14.76045  | 2.23975  | 0.05914  | 0.30937  | 0.00992  | 11.48508 | 0.3009  | 4.11614  | 0.10886  | 0.00257  | 0.00134 | 704.2473 | 13.32433  | 163.32 | 2.95   | 1.81  |
| 70 | 0.5088 | 2551.133 | 286.28935 | 16.59274 | 1.89543  | 4.22327  | 0.47871  | 48.86544 | 0.78782 | 30.80639 | 3.56082  | 0.01433  | 0.00922 | 1319.964 | 51.28535  | 294.91 | 31.18  | 10.57 |
| 71 | 0.5124 | 1010.564 | 58.87232  | 0.52822  | 0.15814  | 0.50359  | 0.0354   | 14.72158 | 0.58066 | 0.96958  | 0.29038  | -0.0022  | 0.00516 | 862.0896 | 50.59331  | 197.98 | 11     | 5.56  |
| 72 | 0.519  | 1295.198 | 59.91191  | 11.79423 | 0.55622  | 1.63308  | 0.07685  | 37.18449 | 0.32344 | 21.82255 | 1.03781  | 0.01643  | 0.00298 | 820.4    | 38.50379  | 188.89 | 8.42   | 4.46  |
| 73 | 0.5247 | 1343.188 | 65.85435  | 16.04742 | 0.79311  | 1.57354  | 0.07813  | 34.5201  | 0.27241 | 29.78233 | 1.4888   | 0.02304  | 0.00374 | 889.5802 | 44.27283  | 203.95 | 9.6    | 4.71  |
| 74 | 0.526  | 3720.077 | 804.99736 | -0.42201 | 0.37036  | 6.95898  | 1.50855  | 55.27925 | 0.72546 | -0.7741  | 0.67915  | 0.04034  | 0.0197  | 1663.138 | 360.82669 | 364.28 | 71.56  | 19.64 |
| 75 | 0.5313 | 786.9515 | 39.4415   | 4.18359  | 0.23553  | 0.27522  | 0.01844  | 10.29099 | 0.46004 | 6.79907  | 0.43472  | 0.00481  | 0.00402 | 708.0317 | 35.7819   | 164.16 | 7.93   | 4.83  |
| 76 | 0.5364 | 157.5736 | 8.48194   | 0.87307  | 0.10698  | 0.10183  | 0.01456  | 19.05491 | 2.35154 | 1.60295  | 1.9654   | 0.02147  | 0.00459 | 127.6028 | 7.95325   | 30.71  | 1.9    | 6.19  |
| 77 | 0.5628 | 51.29631 | 0.49647   | 1.69334  | 0.02626  | 0.01455  | 0.00261  | 8.11314  | 1.50353 | 3.11077  | 0.04831  | 0.00427  | 0.00084 | 47.16371 | 0.89787   | 11.41  | 0.22   | 1.93  |
| 78 | 0.5749 | 108.3572 | 2.62059   | 0.17209  | 0.04097  | 0.004    | 0.00585  | 1.07731  | 1.59684 | 0.13579  | 0.07518  | 0.00111  | 0.00158 | 107.1735 | 3.11739   | 25.83  | 0.75   | 2.90  |
| 79 | 0.583  | 121.712  | 3.80794   | 0.88259  | 0.06304  | 0.04617  | 0.01133  | 11.15256 | 2.72896 | 0.62044  | 0.11581  | 0.00064  | 0.00231 | 108.1791 | 4.74685   | 26.07  | 1.14   | 4.37  |
| 80 | 0.5904 | 691.6728 | 23.48606  | 4.92678  | 0.18419  | 0.30007  | 0.0138   | 12.76143 | 0.39882 | 9.07152  | 0.34033  | 0.00936  | 0.00221 | 605.4863 | 20.82451  | 141.29 | 4.67   | 3.31  |
| 81 | 0.5978 | 267.4388 | 9.55575   | 1.4585   | 0.0861   | 0.48256  | 0.0203   | 53.28053 | 1.19069 | 2.6789   | 0.15831  | 0.00512  | 0.00359 | 125.0609 | 5.50377   | 30.1   | 1.31   | 4.35  |
| 82 | 0.6128 | 276.3205 | 4.65948   | 0.76977  | 0.03677  | 0.54568  | 0.01468  | 58.33858 | 1.236   | 1.41319  | 0.06755  | 0.00867  | 0.00114 | 115.1693 | 3.95184   | 27.74  | 0.94   | 3.39  |
| 83 | 0.6166 | 1907.792 | 127.5043  | 19.82157 | 1.34478  | 0.49571  | 0.0421   | 7.59254  | 0.40248 | 36.8862  | 2.53804  | -0.00381 | 0.00876 | 1787.943 | 121.44354 | 388.87 | 23.76  | 6.11  |
| 84 | 0.623  | 938.0171 | 40.47868  | 4.23746  | 0.21305  | 0.44573  | 0.02463  | 14.00499 | 0.48605 | 7.7985   | 0.39327  | 0.00223  | 0.00312 | 809.0436 | 35.32528  | 186.41 | 7.73   | 4.15  |
| 85 | 0.6525 | 435.7214 | 4.51417   | 1.08595  | 0.02104  | 0.09653  | 0.00317  | 6.52612  | 0.20411 | 1.99411  | 0.03867  | 0.0017   | 0.00084 | 407.5706 | 4.31914   | 96.31  | 0.99   | 1.03  |
| 86 | 0.6568 | 174.2377 | 10.95323  | 1.09313  | 0.1449   | 0.15866  | 0.02441  | 26.86064 | 3.78305 | 2.0073   | 0.26629  | 0.00478  | 0.00555 | 127.5131 | 10.39764  | 30.69  | 2.48   | 8.08  |
| 87 | 0.6764 | 1214.912 | 17.63367  | 0.67785  | 0.03003  | 0.20353  | 0.00655  | 4.94591  | 0.14211 | 1.24435  | 0.05515  | 0.00224  | 0.00126 | 1155.349 | 16.8668   | 260.66 | 3.54   | 1.36  |
| 88 | 0.6866 | 229.5422 | 6.67699   | 3.10721  | 0.1127   | 0.34414  | 0.01439  | 44.19684 | 1.33319 | 5.71385  | 0.20771  | 0.00534  | 0.00227 | 128.3569 | 4.84159   | 30.89  | 1.16   | 3.76  |
| 89 | 0.6922 | 1500.328 | 67.25151  | 4.3056   |          |          |          |          |         |          |          |          |         |          |           |        |        |       |

## WHITE RIVER

Weighted average of J from standards = 9.588e-05 +/- 4.822e-07

| Grain # | Cumulative 40Ar/39Ar +/-<br>39Ar meas. | 37Ar/39Ar +/-<br>meas. | 36Ar/39Ar +/-<br>meas. | % Atm. +/-<br>40Ar | Ca/K    | +/-      | Cl/K     | +/-     | 40*/39K | +/-      | Age<br>(Ma) | +/-<br>(Ma) | %error   |          |        |   |      |
|---------|----------------------------------------|------------------------|------------------------|--------------------|---------|----------|----------|---------|---------|----------|-------------|-------------|----------|----------|--------|---|------|
| 1       | 0.0017 131.0604                        | 2.27389 2.95159        | 0.08615 0.21219        | 0.01247 47.69016   | 2.688   | 4.76392  | 0.15866  | 0.00473 | 0.00183 | 68.66765 | 3.72776     | 11.83       | 0.64     | 5.41     |        |   |      |
| 2       | 0.006 131.5435                         | 0.8265 1.98519         | 0.02135 0.06743        | 0.00535 15.02539   | 1.2     | 3.64767  | 0.03929  | 0.04287 | 0.00074 | 111.9103 | 1.73727     | 19.23       | 0.3      | 1.56     |        |   |      |
| 3       | 0.0172 2257.046                        | 11.37692 0.25332       | 0.00765 0.19499        | 0.0042 2.55201     | 0.05343 | 0.46489  | 0.01403  | 0.00168 | 0.00047 | 2199.811 | 11.15664    | 344.87      | 1.59     | 0.46     |        |   |      |
| 4       | 0.0345 1306.356                        | 7.43379 0.40394        | 0.00778 0.24726        | 0.00468 5.59054    | 0.10096 | 0.74139  | 0.01428  | 0.01007 | 0.00043 | 1233.648 | 7.14584     | 201.45      | 1.1      | 0.55     |        |   |      |
| 5       | 0.0545 75.02337                        | 0.27869 0.24421        | 0.00448 0.06197        | 0.0016 24.39257    | 0.62596 | 0.44816  | 0.00821  | 0.00216 | 0.00015 | 56.71057 | 0.51632     | 9.77        | 0.09     | 0.92     |        |   |      |
| 6       | 0.0682 82.2422                         | 0.57501 0.51997        | 0.00786 0.10148        | 0.00182 36.42245   | 0.60505 | 0.95443  | 0.01444  | 0.00228 | 0.00022 | 52.28791 | 0.62047     | 9.01        | 0.11     | 1.22     |        |   |      |
| 7       | 0.0742 1238.946                        | 12.86062 2.31482       | 0.03581 0.15301        | 0.00532 3.63406    | 0.12106 | 4.25432  | 0.06592  | 0.00608 | 0.00072 | 1195.848 | 12.52461    | 195.6       | 1.94     | 0.99     |        |   |      |
| 8       | 0.0899 1104.016                        | 5.26133 0.09149        | 0.00334 0.09165        | 0.00229 2.45245    | 0.06029 | 0.16788  | 0.00613  | 0.00379 | 0.00028 | 1076.981 | 5.17629     | 177.08      | 0.81     | 0.46     |        |   |      |
| 9       | 0.0923 2182.03                         | 27.11253 1.15462       | 0.04085 0.60264        | 0.01978 8.15693    | 0.24802 | 2.1203   | 0.07508  | 0.01664 | 0.00191 | 2005.652 | 25.52394    | 316.95      | 3.7      | 1.17     |        |   |      |
| 10      | 0.094 2202.101                         | 57.82103 8.9247        | 0.2569 1.12082         | 0.03601 15.00714   | 0.27854 | 16.47946 | 0.47737  | 0.0388  | 0.0037  | 1883.475 | 50.15164    | 299.15      | 7.34     | 2.45     |        |   |      |
| 11      | 0.0952 90.3141                         | 1.46378 3.74598        | 0.08069 0.1488         | 0.02518 48.3598    | 8.20958 | 6.89159  | 0.14885  | 0.00527 | 0.00387 | 46.74675 | 7.47674     | 8.06        | 1.29     | 16.00    |        |   |      |
| 12      | 0.1019 78.74003                        | 0.6974 0.5199          | 0.01311 0.06088        | 0.00335 22.80078   | 1.24288 | 0.9543   | 0.02407  | 0.00402 | 0.00054 | 60.78609 | 1.11886     | 10.47       | 0.19     | 1.81     |        |   |      |
| 13      | 0.1061 101.1146                        | 1.10068 4.20205        | 0.0542 0.13766         | 0.00853 39.9007    | 2.45571 | 7.73313  | 0.10004  | 0.0033  | 0.00114 | 60.93219 | 2.57922     | 10.5        | 0.44     | 4.19     |        |   |      |
| 14      | 0.1084 87.84419                        | 1.06057 0.7737         | 0.03232 0.09842        | 0.00961 33.04735   | 3.21148 | 1.42041  | 0.05937  | 0.00515 | 0.00187 | 58.82628 | 2.91231     | 10.14       | 0.5      | 4.93     |        |   |      |
| 15      | 0.1423 778.4588                        | 2.2639 0.08605         | 0.00278 0.05425        | 0.00092 2.05833    | 0.03425 | 0.1579   | 0.0051   | 0.0008  | 0.00022 | 762.4528 | 2.23388     | 127.14      | 0.36     | 0.28     |        |   |      |
| 16      | 0.1724 77.53897                        | 0.17727 0.11835        | 0.00342 0.08646        | 0.00149 32.94966   | 0.56437 | 0.21718  | 0.00627  | 0.00165 | 0.00025 | 51.97458 | 0.45493     | 8.96        | 0.08     | 0.89     |        |   |      |
| 17      | 0.1751 339.8108                        | 3.82095 3.1764         | 0.06013 0.77033        | 0.01405 66.91659   | 0.96838 | 5.84136  | 0.11083  | 0.00246 | 0.002   | 112.6639 | 3.54388     | 19.36       | 0.61     | 3.15     |        |   |      |
| 18      | 0.1853 130.0111                        | 1.19566 0.69937        | 0.01676 0.06414        | 0.00284 14.53629   | 0.63293 | 1.28389  | 0.03079  | 0.03362 | 0.001   | 111.1418 | 1.31586     | 19.1        | 0.22     | 1.15     |        |   |      |
| 19      | 0.1892 326.1886                        | 4.28407 2.0508         | 0.04111 0.90198        | 0.02018 81.66752   | 1.48547 | 3.7684   | 0.07564  | 0.00144 | 0.00137 | 59.87976 | 4.91957     | 10.32       | 0.85     | 8.24     |        |   |      |
| 20      | 0.2019 116.2426                        | 0.92719 0.75987        | 0.01438 0.19499        | 0.0032 49.52657    | 0.71222 | 1.39501  | 0.02641  | 0.00122 | 0.00027 | 58.68813 | 0.95251     | 10.11       | 0.16     | 1.58     |        |   |      |
| 21      | 0.2071 108.5707                        | 1.18143 2.29928        | 0.02861 0.17528        | 0.00634 47.54439   | 1.64679 | 4.22572  | 0.05267  | 0.00383 | 0.00081 | 57.02845 | 1.89719     | 9.83        | 0.33     | 3.36     |        |   |      |
| 22      | 0.2161 96.61519                        | 0.68744 0.87267        | 0.01663 0.15783        | 0.00381 48.2123    | 1.11919 | 1.60223  | 0.03056  | 0.00658 | 0.0004  | 50.05026 | 1.14357     | 8.63        | 0.2      | 2.32     |        |   |      |
| 23      | 0.2304 94.21737                        | 0.31964 1.677          | 0.01199 0.12193        | 0.00309 38.10833   | 0.96228 | 3.08071  | 0.02206  | 0.0029  | 0.00045 | 58.36347 | 0.93115     | 10.06       | 0.16     | 1.59     |        |   |      |
| 24      | 0.2411 135.073                         | 0.92506 1.09018        | 0.01697 0.2477         | 0.00434 54.13591   | 0.87996 | 2.00187  | 0.03119  | 0.00127 | 0.00064 | 61.98413 | 1.26924     | 10.68       | 0.22     | 2.06     |        |   |      |
| 25      | 0.2427 854.5339                        | 17.81063 17.53177      | 0.39461 0.41086        | 0.0278 14.03916    | 0.91501 | 32.57165 | 0.74323  | 0.03253 | 0.0034  | 743.7478 | 17.58678    | 124.13      | 2.84     | 2.29     |        |   |      |
| 26      | 0.2502 122.831                         | 0.62183 0.92121        | 0.01565 0.0405         | 0.00484 9.68388    | 1.16292 | 1.69139  | 0.02875  | 0.01486 | 0.00075 | 110.9816 | 1.53671     | 19.07       | 0.26     | 1.36     |        |   |      |
| 27      | 0.2541 207.3382                        | 2.16526 3.61626        | 0.05001 0.47536        | 0.01219 67.61422   | 1.59675 | 6.65233  | 0.09224  | 0.00465 | 0.00146 | 67.31042 | 3.40211     | 11.59       | 0.58     | 5.00     |        |   |      |
| 28      | 0.2701 118.2727                        | 0.91553 0.50733        | 0.00803 0.04125        | 0.00214 10.27412   | 0.59427 | 0.93121  | 0.01474  | 0.02633 | 0.00055 | 106.1326 | 1.08376     | 18.24       | 0.19     | 1.04     |        |   |      |
| 29      | 0.2777 119.8193                        | 0.92924 2.3438         | 0.03398 0.17793        | 0.0056 43.73067    | 1.34046 | 4.30768  | 0.06255  | 0.0021  | 0.00054 | 67.51658 | 1.69382     | 11.63       | 0.29     | 2.49     |        |   |      |
| 30      | 0.279 472.7617                         | 10.58617 6.78871       | 0.20663 0.78275        | 0.03154 48.81072   | 1.64081 | 12.51636 | 0.3828   | 0.01789 | 0.00379 | 243.1539 | 9.52975     | 41.53       | 1.61     | 3.88     |        |   |      |
| 31      | 0.281 1020.773                         | 23.37011 6.12202       | 0.15953 0.73249        | 0.02919 21.15567   | 0.69301 | 11.28184 | 0.29526  | 0.00812 | 0.00178 | 808.2927 | 19.91609    | 134.51      | 3.19     | 2.37     |        |   |      |
| 32      | 0.2869 137.373                         | 1.27135 1.74014        | 0.02474 0.29027        | 0.00667 62.34945   | 1.31952 | 3.19685  | 0.04551  | 0.00523 | 0.00074 | 51.77415 | 1.88139     | 8.92        | 0.32     | 3.59     |        |   |      |
| 33      | 0.288 1223.263                         | 46.09927 15.77716      | 0.61208 0.24777        | 0.037 5.87918      | 0.86496 | 29.2751  | 1.14854  | 0.02408 | 0.00481 | 1164.29  | 45.64677    | 190.7       | 7.09     | 3.72     |        |   |      |
| 34      | 0.3034 68.03121                        | 0.36136 1.44377        | 0.01381 0.05715        | 0.00192 24.66149   | 0.82432 | 2.65183  | 0.0254   | 0.00059 | 0.00034 | 51.28363 | 0.62421     | 8.84        | 0.11     | 1.24     |        |   |      |
| 35      | 0.3063 447.6505                        | 6.54427 13.59567       | 0.24195 0.59175        | 0.01967 38.81424   | 1.16786 | 25.18803 | 0.45259  | 0.01117 | 0.00168 | 276.5356 | 6.68397     | 47.16       | 1.12     | 2.37     |        |   |      |
| 36      | 0.3078 1456.875                        | 41.52295 17.77999      | 0.53494 0.4513         | 0.03434 9.05341    | 0.64607 | 33.03868 | 1.00667  | 0.01419 | 0.0022  | 1341.8   | 39.89251    | 218.09      | 6.11     | 2.80     |        |   |      |
| 37      | 0.3125 223.2365                        | 2.14868 0.59415        | 0.02331 0.38381        | 0.00903 50.79067   | 1.09562 | 1.09065  | 0.04281  | 0.00531 | 0.00095 | 109.8847 | 2.67449     | 18.89       | 0.46     | 2.44     |        |   |      |
| 38      | 0.3128 944.4672                        | 92.42801 41.6861       | 4.10152 2.15567        | 0.02177 67.08373   | 4.85891 | 78.80832 | 7.98919  | 0.3152  | 0.01344 | 320.3034 | 57.29786    | 54.51       | 9.6      | 17.61    |        |   |      |
| 39      | 0.3298 136.2291                        | 0.77417 1.27073        | 0.01545 0.26255        | 0.00367 56.88694   | 0.7326  | 2.33371  | 0.02839  | 0.00323 | 0.00046 | 58.7725  | 1.05706     | 10.13       | 0.18     | 1.78     |        |   |      |
| 40      | 0.3394 70.59535                        | 0.69733 0.41679        | 0.01259 0.07129        | 0.0042 29.80343    | 1.73603 | 0.76498  | 0.02312  | 0.00099 | 0.00036 | 49.54926 | 1.32253     | 8.54        | 0.23     | 2.69     |        |   |      |
| 41      | 0.3464 107.3341                        | 1.10424 1.77754        | 0.0266 0.17234         | 0.00603 47.32412   | 1.5908  | 2.36564  | 0.04892  | 0.00166 | 0.00051 | 56.59459 | 1.80871     | 9.75        | 0.31     | 3.18     |        |   |      |
| 42      | 0.3644 107.9405                        | 0.59718 0.27042        | 0.00637 0.15499        | 0.00313 42.42174   | 0.82869 | 0.49627  | 0.01169  | 0.00087 | 0.00024 | 62.14504 | 0.96572     | 10.71       | 0.17     | 1.59     |        |   |      |
| 43      | 0.3654 1758.562                        | 36.95139 18.94059      | 0.41327 3.71805        | 0.10036 62.38852   | 1.06205 | 53.22455 | 0.779    | 0.02646 | 0.00672 | 670.3772 | 23.7402     | 112.25      | 3.85     | 3.43     |        |   |      |
| 44      | 0.3665 1364.208                        | 24.32118 27.49689      | 0.5141 0.32281         | 0.02751 6.86268    | 0.85301 | 51.45214 | 0.98104  | 0.01129 | 0.0045  | 1296.227 | 24.93366    | 211.1       | 3.83     | 1.81     |        |   |      |
| 45      | 0.3729 94.24648                        | 0.62905 0.82417        | 0.02036 0.10924        | 0.00492 34.18889   | 1.52649 | 1.51313  | 0.0374   | 0.00143 | 0.00083 | 62.04123 | 1.4995      | 10.69       | 0.26     | 2.43     |        |   |      |
| 46      | 0.3735 796.078                         | 40.96651 14.91325      | 0.83673 1.43042        | 0.10324 52.94389   | 2.69024 | 27.65502 | 1.56814  | 0.03783 | 0.00896 | 378.5767 | 29.27555    | 64.25       | 4.88     | 7.60     |        |   |      |
| 47      | 0.3749 2587.447                        | 60.08254 14.53602      | 0.36148 1.06234        | 0.03664 12.08629   | 0.3094  | 26.94823 | 0.6771   | 0.00773 | 0.00352 | 2298.287 | 54.52688    | 358.86      | 7.72     | 2.15     |        |   |      |
| 48      | 0.3758 807.7271                        | 30.4278                | 12.085                 | 0.487              | 0.62252 | 0.06844  | 22.65183 | 2.35287 | 22.3652 | 0.90903  | 0.01614     | 0.00517     | 630.1172 | 30.67849 | 105.71 | 5 | 4.73 |
| 49      | 0.384 63.41034                         | 0.37 1.30712           | 0.01416 0.02613        | 0.0047 12.01115    | 2.18854 | 2.4006   | 0.02602  | 0.0045  | 0.00058 | 55.81944 | 1.42668     | 9.62        | 0.25     | 2.60     |        |   |      |
| 50      | 0.392 72.36522                         | 0.5854 0.34291         | 0.01417 0.03675        | 0.00389 14.97365   | 1.58498 | 0.62934  | 0.02601  | 0.0018  | 0.00057 | 61.51915 | 1.25102     | 10.6        | 0.21     | 1.98     |        |   |      |
| 51      | 0.4073 91.20034                        | 0.44043 0.75518        | 0.01411 0.11813        | 0.00353 38.2205    | 1.1307  | 1.38638  | 0.02592  | 0.00106 | 0.00033 | 56.35483 | 1.06926     | 9.71        | 0.18     | 1.85     |        |   |      |
| 52      | 0.4091 374.5372                        | 4.99337 22.55789       | 0.3496 0.91836         | 0.02775 71.96549   | 1.96838 | 42.06068 | 0.66241  | 0.01924 | 0.00304 | 106.6911 | 7.63417     | 18.34       | 1.31     | 7.14     |        |   |      |
| 53      | 0.4418 145.6707                        | 0.88111 0.19738        | 0.0035 0.31027         | 0.00348 62.94088   | 0.59525 | 0.36222  | 0.00643  | 0.00186 | 0.00028 | 53.98078 | 0.92693     | 9.3         | 0.16     | 1.72     |        |   |      |
| 54      | 0.4483 186.3331                        | 1.84021 8.24494        | 0.10768 0.40962        | 0.00794 64.60656   | 1.08986 | 15.21694 | 0.19899  | 0.00774 | 0.00073 | 66.32543 | 2.15193     | 11.42       | 0.37     | 3.24     |        |   |      |
| 55      | 0.4498 1862.174                        | 42.9527 7.5181         | 0.19723 1.48065        | 0.04509 23.46288   | 0.46768 | 13.8683  | 0.36577  | 0.05454 | 0.00494 | 1432.839 | 34.36811    | 231.97      | 5.22     | 2.25     |        |   |      |
| 56      | 0.4562 62.71483                        | 0.50467 1.46783        | 0.02292 0.02081        | 0.00405 9.61691    | 1.90949 | 2.69606  | 0.04214  | 0.00354 | 0.00055 | 56.71558 | 1.28377     | 9.77        | 0.22     | 2.25     |        |   |      |
| 57      | 0.4701 99.51213                        | 0.65477 0.78841        | 0.00971 0.15353        | 0.00271 45.53956   | 0.75304 | 1.44742  | 0.01784  | 0.00305 | 0.00034 | 54.20876 | 0.8354      | 9.34        | 0.14     | 1.50     |        |   |      |
| 58      | 0.4735 591.0393                        | 7.76083 7.07348        | 0.12055 0.31969        | 0.00897 15.88579   | 0.3978  | 13.04403 | 0.22342  | 0.00373 | 0.00154 | 499.619  | 7.019       | 84.32       | 1.16     | 1.38     |        |   |      |
| 59      | 0.4771 78.67936                        | 0.68037 1.39246        | 0.02305 0.12832        | 0.00087 48.06517   | 3.24906 | 2.55748  | 0.04237  | 0.00458 | 0.00144 | 40.88679 | 2.58807     | 7.05        | 0.45     | 6.38     |        |   |      |
| 60      | 0.4849 1273.341                        | 14.35371 1.93881       | 0.03836 0.44171        | 0.00956 10.23827   | 0.18    |          |          |         |         |          |             |             |          |          |        |   |      |

|     |        |          |           |          |         |         |         |          |         |          |          |          |         |          |           |        |       |       |
|-----|--------|----------|-----------|----------|---------|---------|---------|----------|---------|----------|----------|----------|---------|----------|-----------|--------|-------|-------|
| 87  | 0.6871 | 1546.393 | 180.11575 | 45.0429  | 5.30246 | 1.94221 | 0.25549 | 36.87432 | 2.27027 | 85.36292 | 10.37909 | 0.05518  | 0.01424 | 1008.224 | 126.60718 | 166.28 | 19.95 | 12.00 |
| 88  | 0.6903 | 1855.925 | 29.72444  | 0.96411  | 0.04396 | 0.07277 | 0.0119  | 1.15445  | 0.18852 | 1.77021  | 0.08078  | 0.00143  | 0.00165 | 1835.72  | 29.62906  | 292.15 | 4.35  | 1.49  |
| 89  | 0.7066 | 77.12561 | 0.42721   | 0.26491  | 0.00635 | 0.05529 | 0.00283 | 21.16484 | 1.07814 | 0.48616  | 0.01166  | 0.00065  | 0.00035 | 60.79006 | 0.9007    | 10.47  | 0.15  | 1.43  |
| 90  | 0.7081 | 1628.994 | 49.42735  | 1.63769  | 0.00181 | 0.28999 | 0.02584 | 5.25215  | 0.44078 | 3.00842  | 0.01758  | 0.00352  | 0.00452 | 1545.195 | 47.48967  | 248.96 | 7.15  | 2.87  |
| 91  | 0.7087 | 2221.024 | 150.40616 | 2.10283  | 0.23853 | 1.09303 | 0.10038 | 14.5348  | 0.90281 | 3.86414  | 0.43897  | 0.05099  | 0.01275 | 1901     | 130.49503 | 301.72 | 19.07 | 6.32  |
| 92  | 0.7096 | 1286.979 | 55.64371  | 19.57919 | 0.87846 | 0.90289 | 0.07155 | 20.60612 | 1.37707 | 36.42883 | 1.65736  | 0.02096  | 0.00866 | 1036.086 | 48.85741  | 170.67 | 7.68  | 4.50  |
| 93  | 0.7125 | 132.5289 | 2.09041   | 2.91677  | 0.0846  | 0.18996 | 0.02187 | 42.1841  | 4.83285 | 5.36292  | 0.01587  | 0.01332  | 0.0028  | 76.76377 | 6.53149   | 13.21  | 1.12  | 8.48  |
| 94  | 0.7171 | 98.02786 | 1.11374   | 1.58595  | 0.03629 | 0.14228 | 0.01272 | 42.76787 | 3.80484 | 2.91326  | 0.06674  | 0.00624  | 0.00178 | 56.14934 | 3.78919   | 9.68   | 0.65  | 6.71  |
| 95  | 0.7187 | 1121.01  | 24.59686  | 5.34079  | 0.16755 | 0.58261 | 0.03311 | 15.31877 | 0.80618 | 9.83672  | 0.30976  | 0.0097   | 0.00552 | 952.854  | 22.8869   | 157.54 | 3.62  | 2.30  |
| 96  | 0.7251 | 60.50984 | 0.35734   | 1.95253  | 0.03328 | 0.02432 | 0.00698 | 11.6149  | 3.40993 | 3.58758  | 0.06122  | 0.00781  | 0.00124 | 53.52928 | 2.08971   | 9.22   | 0.36  | 3.90  |
| 97  | 0.7291 | 58.38175 | 0.78477   | 1.65643  | 0.03477 | 0.00876 | 0.00959 | 4.20112  | 4.85574 | 3.04287  | 0.06396  | 0.00996  | 0.0014  | 55.96611 | 2.93525   | 9.64   | 0.5   | 5.19  |
| 98  | 0.7331 | 124.8387 | 2.03761   | 3.02918  | 0.07305 | 0.1701  | 0.01104 | 40.07206 | 2.53182 | 5.57005  | 0.13461  | 0.00832  | 0.00204 | 74.95588 | 3.39747   | 12.9   | 0.58  | 4.50  |
| 99  | 0.7386 | 1503.214 | 21.45989  | 3.49279  | 0.06549 | 0.11596 | 0.00768 | 2.26048  | 0.14743 | 6.42463  | 0.12077  | 0.00866  | 0.00111 | 1472.838 | 21.19561  | 238.03 | 3.21  | 1.35  |
| 100 | 0.7392 | 682.4831 | 67.67881  | 28.79877 | 2.86395 | 0.55012 | 0.09046 | 23.47232 | 3.12487 | 53.93879 | 5.4754   | 0.04508  | 0.01114 | 533.1086 | 58.19673  | 89.83  | 9.57  | 10.65 |
| 101 | 0.7398 | 1382.997 | 124.68071 | 38.71615 | 3.50186 | 2.4707  | 0.23108 | 52.56088 | 1.31996 | 73.03574 | 6.79176  | 0.08917  | 0.01376 | 674.5102 | 65.29748  | 112.93 | 10.6  | 9.39  |
| 102 | 0.75   | 79.6541  | 0.68954   | 1.13013  | 0.01538 | 0.08361 | 0.00444 | 30.91339 | 1.62918 | 2.07528  | 0.02826  | 0.00689  | 0.00066 | 55.05375 | 1.38767   | 9.49   | 0.24  | 2.53  |
| 103 | 0.7619 | 73.66763 | 0.73467   | 1.16753  | 0.01733 | 0.05593 | 0.00339 | 22.31437 | 1.34377 | 2.14403  | 0.03184  | 0.00847  | 0.00085 | 57.25332 | 1.14661   | 9.86   | 0.2   | 2.03  |
| 104 | 0.7692 | 96.72718 | 1.44452   | 0.18201  | 0.02006 | 0.13424 | 0.00668 | 41.00794 | 1.95192 | 0.33401  | 0.03681  | 0.00378  | 0.00144 | 57.05117 | 2.07585   | 9.83   | 0.36  | 3.66  |
| 105 | 0.7737 | 356.0868 | 6.76694   | 0.79117  | 0.03492 | 0.84075 | 0.01871 | 69.75773 | 0.81747 | 1.45251  | 0.06415  | 0.02667  | 0.00239 | 107.74   | 3.57264   | 18.52  | 0.61  | 3.29  |
| 106 | 0.7872 | 72.90826 | 0.70269   | 0.55004  | 0.01606 | 0.08885 | 0.00406 | 35.96305 | 1.61239 | 1.00963  | 0.02949  | 0.0025   | 0.00075 | 46.68735 | 1.2622    | 8.05   | 0.22  | 2.73  |
| 107 | 0.7878 | 165.762  | 236.07361 | 26.01711 | 3.7697  | 3.04207 | 0.44482 | 54.82486 | 1.29734 | 48.63134 | 7.17824  | 0.08002  | 0.02205 | 752.776  | 112.7846  | 125.58 | 18.17 | 14.47 |
| 108 | 0.7928 | 1069.677 | 17.38481  | 0.22842  | 0.03252 | 0.08642 | 0.00825 | 2.38559  | 0.2246  | 0.41918  | 0.05969  | 0.0057   | 0.00193 | 1044.298 | 17.1449   | 171.96 | 2.69  | 1.56  |
| 109 | 0.8132 | 67.25109 | 0.29973   | 0.22175  | 0.01063 | 0.03089 | 0.00157 | 13.55238 | 0.68652 | 0.40694  | 0.01952  | 0.00189  | 0.00043 | 58.1204  | 0.53144   | 10.01  | 0.09  | 0.90  |
| 110 | 0.8235 | 209.4417 | 1.59479   | 1.97681  | 0.02867 | 0.5578  | 0.00752 | 78.63293 | 0.98995 | 3.63225  | 0.05276  | 0.00872  | 0.0009  | 44.80776 | 1.92897   | 7.73   | 0.33  | 4.27  |
| 111 | 0.8448 | 87.23567 | 0.49445   | 0.48774  | 0.01134 | 0.075   | 0.00226 | 25.36741 | 0.75588 | 0.89524  | 0.02083  | 0.00249  | 0.00045 | 65.10651 | 0.76271   | 11.21  | 0.13  | 1.16  |
| 112 | 0.847  | 1282.441 | 46.10528  | 5.81234  | 0.22519 | 0.62544 | 0.02858 | 14.37427 | 0.4066  | 10.7088  | 0.41661  | 0.02526  | 0.00443 | 1102.6   | 40.14762  | 181.09 | 6.27  | 3.46  |
| 113 | 0.8654 | 75.14598 | 0.44475   | 0.15702  | 0.01098 | 0.07614 | 0.00134 | 29.93414 | 0.50312 | 0.28815  | 0.02014  | 0.00279  | 0.0005  | 52.63671 | 0.49943   | 9.07   | 0.09  | 0.99  |
| 114 | 0.8768 | 772.465  | 0.46073   | 7.72668  | 0.05539 | 0.34171 | 0.00457 | 12.98988 | 0.15662 | 14.25517 | 0.10276  | 0.00702  | 0.00077 | 675.7846 | 4.23307   | 113.13 | 0.69  | 0.61  |
| 115 | 0.9235 | 91.66482 | 0.28231   | 0.16298  | 0.00467 | 0.11349 | 0.00118 | 36.58433 | 0.36535 | 0.29909  | 0.00857  | 0.00092  | 0.00018 | 58.11772 | 0.38015   | 10.01  | 0.07  | 0.70  |
| 116 | 0.9766 | 61.42683 | 0.23765   | 0.0111   | 0.00315 | 0.04226 | 0.00029 | 20.33812 | 0.46678 | 0.02036  | 0.00577  | 0.00088  | 0.00031 | 48.91049 | 0.3545    | 8.43   | 0.06  | 0.71  |
| 117 | 1      | 69.9009  | 0.19277   | 0.66871  | 0.00694 | 0.04137 | 0.00144 | 17.41842 | 0.60569 | 1.22756  | 0.01274  | 0.0036   | 0.00031 | 57.72801 | 0.45452   | 9.95   | 0.08  | 0.80  |
| 118 | 0.9277 | 274.6356 | 5.65689   | 0.86135  | 0.04209 | 0.67144 | 0.01619 | 72.22696 | 0.92823 | 1.58142  | 0.07732  | -0.0038  | 0.00202 | 76.31281 | 3.01713   | 13.14  | 0.52  | 3.96  |
| 119 | 0.9352 | 78.99803 | 0.97619   | 0.32033  | 0.02203 | 0.05388 | 0.00472 | 20.12874 | 1.75064 | 0.5879   | 0.04044  | -0.00379 | 0.00106 | 63.08728 | 1.5889    | 10.87  | 0.27  | 2.48  |
| 120 | 0.9411 | 255.5728 | 3.9169    | 0.4568   | 0.0348  | 0.41021 | 0.01185 | 47.42043 | 1.16916 | 0.83843  | 0.06389  | 0.00554  | 0.0012  | 134.4068 | 3.6472    | 23.07  | 0.62  | 2.69  |
| 121 | 0.9539 | 44.42542 | 0.31554   | 0.478    | 0.02073 | 0.14603 | 0.0024  | 97.10826 | 1.45887 | 0.87736  | 0.03806  | 0.00629  | 0.00071 | 1.28424  | 0.64821   | 0.22   | 0.11  | 50.00 |

Integrated 285.8563 0.22348 1.44154 0.00227 0.19144 0.00053 19.75 0.0526 2.64773 0.00418 0.00515 0.00007 229.6096 0.23472 39.24 0.2 0.51

#### CHITSTONE RIVER

Weighted average of J from standards = 1.347e-04 2.749e-06

| Grain # | Cumulative 40Ar/39Ar<br>39Ar meas. |          | 37Ar/39Ar<br>meas. | 36Ar/39Ar<br>meas. | % Atm.<br>40Ar | Ca/K     | Cl/K     | 40*/39K  | Age<br>(Ma) | (Ma)     | %error   |          |          |          |           |          |         |         |
|---------|------------------------------------|----------|--------------------|--------------------|----------------|----------|----------|----------|-------------|----------|----------|----------|----------|----------|-----------|----------|---------|---------|
| 1       | 0.0066                             | 1247.89  | 29.99682           | 2.60205            | 0.1796         | 0.48747  | 0.01426  | 11.52637 | 0.19575     | 4.78319  | 0.33076  | 0.01672  | 0.00371  | 1106.06  | 26.77963  | 250.28   | 5.66    | 2.26    |
| 2       | 0.0091                             | 827.0884 | 47.09091           | -0.29955           | 0.35253        | 0.21506  | 0.03131  | 7.68695  | 0.12092     | -0.54952 | 0.64658  | 0.01755  | 0.00408  | 763.3216 | 44.28359  | 176.37   | 9.75    | 5.53    |
| 3       | 0.0111                             | 685.8748 | 53.38574           | 3.77277            | 0.85559        | 0.29823  | 0.04772  | 12.80389 | 1.79662     | 6.941    | 1.57828  | 0.02609  | 0.00669  | 599.6279 | 48.40855  | 139.98   | 10.87   | 7.77    |
| 4       | 0.0219                             | 233.5346 | 4.69148            | 0.54796            | 0.10019        | 0.03334  | 0.0061   | 4.2      | 0.7675      | 1.00582  | 0.18397  | 0.00481  | 0.00132  | 223.7843 | 4.84319   | 53.52    | 1.14    | 2.13    |
| 5       | 0.0329                             | 72.19373 | 1.21218            | 0.71637            | 0.10191        | 0.1016   | 0.00603  | 41.52359 | 2.36961     | 1.3151   | 0.18718  | 0.00706  | 0.00127  | 42.2203  | 1.85377   | 10.22    | 0.45    | 4.40    |
| 6       | 0.0436                             | 91.03849 | 1.377              | 0.37964            | 0.10916        | 0.10209  | 0.00579  | 33.11342 | 1.82036     | 0.69677  | 0.2004   | 0.01605  | 0.00151  | 60.889   | 1.91192   | 14.72    | 0.46    | 3.13    |
| 7       | 0.0483                             | 184.1555 | 9.1148             | 0.64704            | 0.29764        | 0.07109  | 0.01504  | 11.38077 | 2.34756     | 1.18777  | 0.54664  | 0.0051   | 0.0034   | 163.2455 | 9.17255   | 39.2     | 2.18    | 5.56    |
| 8       | 0.0666                             | 1275.337 | 16.59632           | -0.04999           | 0.09074        | 0.0571   | 0.00374  | 1.32327  | 0.085       | -0.09172 | 0.16649  | 0.00081  | 0.00099  | 1258.388 | 16.38527  | 282.17   | 3.4     | 1.20    |
| 9       | 0.0686                             | 974.5822 | 99.78026           | 16.21151           | 1.85972        | 1.33836  | 0.14635  | 40.44424 | 1.55989     | 30.09039 | 3.49183  | 0.11711  | 0.01491  | 587.1242 | 62.73165  | 137.17   | 14.11   | 10.29   |
| 10      | 0.0704                             | 226.581  | 29.30557           | 7.38908            | 1.26313        | 0.27761  | 0.05344  | 35.94144 | 5.1652      | 13.62907 | 2.34206  | 0.01679  | 0.00905  | 45.8869  | 22.32683  | 35.07    | 5.32    | 15.17   |
| 11      | 0.0764                             | 852.1142 | 40.84393           | 0.7872             | 0.27959        | 0.11569  | 0.0117   | 4.00436  | 0.35744     | 1.44522  | 0.51358  | -0.0008  | 0.00326  | 818.419  | 39.37294  | 188.46   | 8.61    | 4.57    |
| 12      | 0.0787                             | 771.0959 | 66.9764            | 16.38707           | 1.6177         | 0.89384  | 0.08501  | 34.07982 | 1.32994     | 30.42006 | 0.30816  | 0.00624  | 0.00739  | 514.2397 | 46.37948  | 120.69   | 10.53   | 8.72    |
| 13      | 0.0818                             | 1697.904 | 99.09835           | -0.58992           | 0.48354        | 0.53421  | 0.04151  | 9.30036  | 0.47773     | -1.08198 | 0.88649  | -0.00953 | 0.0069   | 1539.324 | 90.1844   | 339.56   | 18.13   | 5.34    |
| 14      | 0.0933                             | 705.5746 | 11.67185           | 0.09168            | 0.15077        | 0.11847  | 0.01119  | 4.96062  | 0.46179     | 0.16823  | 0.27667  | -0.00072 | 0.00255  | 670.5889 | 11.5714   | 155.84   | 2.58    | 1.66    |
| 15      | 0.1079                             | 44.62956 | 0.66594            | 0.00732            | 0.12728        | 0.00502  | 0.00549  | 3.32573  | 3.6372      | 0.01343  | 0.23355  | 0.00057  | 0.00163  | 43.11681 | 1.74558   | 10.44    | 0.42    | 4.02    |
| 16      | 0.1137                             | 796.5988 | 34.32562           | -0.49987           | 0.27363        | 0.20095  | 0.01945  | 7.54966  | 0.6468      | -0.91687 | 0.50172  | 0.0004   | 0.00469  | 736.8876 | 32.16657  | 170.54   | 7.1     | 4.16    |
| 17      | 0.1138                             | 8982.015 | 32361.347          | -16.8327           | 67.04538       | 5.39671  | 19.48236 | 17.77019 | 4.02929     | -30.5229 | 120.1456 | 0.68373  | 2.49845  | 7299.101 | 25992.014 | 1233.9   | 3181.4  | 257.83  |
| 18      | 0.1138                             | 54399.15 | 1258568.8          | 2555.242           | 59117.89       | 150.0281 | 3471.055 | 81.1091  | 8.10256     | -5827.51 | 167578.1 | -17.2698 | 399.5221 | -12773   | 367349.05 | -26001.7 | 123753  | -475.94 |
| 19      | 0.1142                             | 861.8433 | 434.59996          | 36.88698           | 19.20474       | 2.10896  | 1.07921  | 71.95944 | 6.30802     | 69.49282 | 37.14828 | 0.15114  | 0.09558  | 248.1212 | 140.10709 | 59.25    | 32.91   | 55.54   |
| 20      | 0.1227                             | 49.83062 | 1.67847            | 0.75243            | 0.24543        | 0.01358  | 0.00416  | 7.93313  | 2.45594     | 1.38134  | 0.45082  | 0.00722  | 0.00294  | 45.87454 | 1.97373   | 11.1     | 0.48    | 4.32    |
| 21      | 0.1273                             | 785.1615 | 51.86563           | 10.7953            | 0.43376        | 0.11887  | 0.02837  | 4.46255  | 1.02602     | 1.9823   | 0.7971   | 0.00893  | 0.00496  | 750.6673 | 50.27937  | 173.58   | 11.08   | 6.38    |
| 22      | 0.1285                             | 1143.188 | 189.11542          | 19.16064           | 3.59244        | 0.86735  | 0.15283  | 22.28229 | 1.36115     | 35.63939 | 6.77371  | 0.22631  | 0.04243  | 900.6235 | 151.86636 | 206.34   | 32.88   | 15.93   |
| 23      | 0.1335                             | 1271.345 | 58.68447           | -0.17539           | 0.35477        | 0.18269  | 0.01602  | 4.24751  | 0.31675     | -0.32178 | 0.6508   | 0.00434  | 0.00423  | 1217.166 | 56.32685  | 273.6    | 11.75   | 4.29    |
| 24      | 0.1348                             | 494.2648 | 81.87045           | 9.48884            | 2.12549        | 0.47354  | 0.10738  | 28.1542  | 4.38569     | 17.52818 | 3.95279  | 0.05651  | 0.01974  | 357.4828 | 63.49075  | 87.75    | 14.7    | 17.35   |
| 25      | 0.1663                             | 102.0124 | 0.86855            | 0.20134            | 0.07399        | 0.18722  | 0.00392  | 54.23122 | 1.04746     | 0.36949  | 0.1358   | 0.00108  | 0.00074  | 46.6829  | 1.14795   | 11.3     | 0.28    | 2.48    |
| 26      | 0.1691                             | 42.82116 | 3.57613            | 0.37109            | 0.80487        | -0.03768 | 0.02489  | -26.7831 | 17.05372    | 7.3069   | 1.48515  | 0.00758  | 0.00634  | 54.40666 | 8.61405   | 13.16    | 2.08    | 15.81   |
| 27      | 0.172                              | 1145.47  | 80.19789           | -0.09905           | 0.60627        | 0.24702  | 0.03228  | 6.77323  | 0.70326     | -0.18174 | 1.11227  | 0.00494  | 0.00622  | 1072.362 | 75.51097  | 243.14   | 16.02   | 6.59    |
| 28      | 0.1727                             | 2746.564 | 899.66135          | 7.07195            | 4.30935        | 5.28202  | 1.73694  | 56.80088 | 1.66189     | 13.04119 | 7.98665  | 0.0883   | 0.04751  | 1192.236 | 395.21651 | 268.39   | 82.66   | 30.80   |
| 29      | 0.1797                             | 58.34013 | 1.88937            | 0.99086            | 0.31972        | 0.00573  | 0.01229  | 2.76278  | 6.22673     | 1.81937  | 0.58746  | 0.01061  | 0.00381  | 56.73917 | 4.07326   | 13.72    | 0.98    | 7.14    |
| 30      | 0.1863                             | 810.5845 | 27.02466           | -0.14805           | 0.30136        | 0.03192  | 0.0119   | 1.16522  | 0.43215     | -0.27162 | 0.55284  | 0.00614  | 0.00271  | 801.0263 | 26.93497  | 184.65   | 5.9     | 3.20    |
| 31      | 0.1979                             | 819.2778 | 24.52524           | 0.32185            | 0.15874        | 0.93214  | 0.03269  | 33.61878 | 0.61406     | 0.59069  | 0.29141  | -0.00059 | 0.00166  | 543.9506 | 17.05056  | 127.43   | 3.86    | 3.03    |
| 32      | 0.2021                             | 514.1636 | 38.69597           | 3.94527            | 0.56959        | 0.25089  | 0.02453  | 14.35646 | 0.90034     | 7.25926  | 1.50597  | 0.00388  | 0.00377  | 441.5528 | 33.65187  | 104.12   | 7.71    | 7.40    |
| 33      | 0.2147                             | 1130.027 | 27.96633           | 0.10813            | 0.13998        | 0.19579  | 0.00909  | 5.11912  | 0.20126     | 0.19842  | 0.25689  | -0.00178 | 0.00138  | 1072.233 | 26.63673  | 243.11   | 5.65    | 2.32    |
| 34      | 0.2287                             | 642.0668 | 15.58244           | 0.35679            | 0.1374         | 0.04805  | 0.00559  | 2.20684  | 0.25179     | 0.65483  | 0.25223  | 0.00639  | 0.00157  | 628.0266 | 15.32033  | 146.34   | 3.43    | 2.34    |
| 35      | 0.2513                             | 1138.709 | 14.98778           | 0.00777            | 0.0967         | 0.06652  | 0.0036   | 1.72614  | 0.09062     | 0.01412  | 0.17743  | 0.00087  | 0.00111  | 1119.03  | 14.76588  | 253.01   | 3.11    | 1.23    |
| 36      | 0.2726                             | 437.2886 | 6.3934             | 0.13714            | 0.08906        | 0.47027  | 0.01003  | 31.77812 | 0.49351     | 0.25165  | 0.15611  | 0.01015  | 0.00108  | 298.3351 | 4.86868   | 71       | 1.14    | 1.61    |
| 37      | 0.28                               | 674.9037 | 22.57424           | 4.50218            | 0.28986        | 0.61026  | 0.02637  | 27.03098 | 0.72002     | 8.28723  | 0.55205  | 0.00697  | 0.00309  | 494.0198 | 17.30251  | 116.1    | 3.94    | 3.69    |
| 38      | 0.2937                             | 61.37537 | 1.27985            | 1.36599            | 0.1371         | 0.0951   | 0.00599  | 45.62616 | 2.7266      | 2.50882  | 0.25204  | 0.00093  | 0.00198  | 33.38822 | 1.818     | 8.09     | 0.44    | 5.44    |
| 39      | 0.2937                             | -21113.1 | 407667.48          | -3451.97           | 66653.21       | -58.2857 | 1125.438 | 80.22867 | 8.55537     | -1842.41 | 10347.98 | -0.34959 | 6.72126  | -1214.25 | 6840.0315 | -321.85  | 1985.05 | -616.76 |
| 40      | 0.3208                             | 160.0902 | 12.84641           | 3.61183            | 0.74042        | 0.19803  | 0.01854  | 36.37291 | 1.79588     | 6.64416  | 1.2984   | 0.04715  | 0.0091   | 102.1023 | 8.73714   | 24.62    | 2.09    | 8.49    |
| 41      | 0.3283                             | 332.7633 | 23.62526           | 5.07986            | 0.60256        | 0.22302  | 0.02183  | 19.68014 | 1.33465     | 9.3544   | 1.11359  | 0.04403  | 0.00748  | 268.2135 | 19.62735  | 63.96    | 4.6     | 7.19    |
| 42      | 0.3325                             | 855.9989 | 63.73502           | 7.16851            | 0.78591        | 2.5652   | 0.19232  | 88.59202 | 0.78251     | 13.22016 | 1.45675  | 0.05552  | 0.01008  | 98.64156 | 10.01545  | 23.79    | 2.4     | 10.09   |
| 43      | 0.3374                             | 874.044  | 62.44642           | -0.19131           | 0.71511        | 0.13613  | 0.02304  | 4.60435  | 0.70613     | -0.35099 | 1.31178  | 0.00958  | 0.00891  | 833.659  | 59.8774   | 191.79   | 13.07   | 6.81    |
| 44      | 0.3658                             | 554.9631 | 5.89596            | -0.13336           | 0.09381        | 0.00476  | 0.00249  | 0.25545  | 0.13231     | -0.24467 | 0.17209  | 0.00097  | 0.00115  | 553.4637 | 5.92564   | 129.58   | 1.34    | 1.03    |
| 45      | 0.3729                             | 1110.219 | 46.06095           | 0.37426            | 0.3052         | 0.1516   | 0.01427  | 4.0325   | 0.34097     | 0.6869   | 0.5603   | 0.00821  | 0.00482  | 1065.702 | 44.39252  | 241.73   | 9.42    | 3.90    |
| 46      | 0.3834                             | 70.37077 | 2.25748            | 2.38076            | 0.27614        | 0.09425  | 0.00858  | 39.31567 | 3.38088     | 4.37573  | 0.50838  | 0.0061   | 0.00305  | 42.75793 | 2.75652   | 10.35    | 0.67    | 6.47    |
| 47      | 0.3833                             | -10954.3 | 87824.474          | -328.397           | 2633.399       | -25.5277 | 204.6817 | 68.61337 | 7.21113     | -489.126 | 3183.876 | -1.14461 | 9.20023  | -2790.76 | 18173.619 | -849.23  | 7068.87 | -832.39 |
| 48      | 0.3997                             | 48.2783  | 0.83094            | -0.16121           | 0.10708        | 0.01861  | 0.00649  | 11.42441 | 3.96923     | -0.29577 | 0.19644  | 0.00232  | 0.002    | 42.73162 | 2.0537    | 10.34    | 0.5     | 4.84    |

|     |        |          |           |          |          |          |          |          |          |          |          |          |         |          |           |         |         |        |
|-----|--------|----------|-----------|----------|----------|----------|----------|----------|----------|----------|----------|----------|---------|----------|-----------|---------|---------|--------|
| 49  | 0.4019 | 776.511  | 89.31946  | 1.11336  | 1.00826  | 0.14504  | 0.03567  | 5.50776  | 1.19991  | 2.04447  | 1.85293  | 0.00327  | 0.01285 | 734.292  | 85.04998  | 169.97  | 18.79   | 11.05  |
| 50  | 0.4018 | -20340.3 | 58791.986 | 157.869  | 456.8501 | 0.23973  | 1.3517   | -0.28429 | 1.68608  | 326.015  | 1061.823 | 1.72436  | 5.0031  | -22957.7 | 74685.788 | -437790 | 8664.14 | -1.98  |
| 51  | 0.4075 | 1020.457 | 46.30231  | -2.21146 | 0.30549  | 0.19007  | 0.01755  | 5.52211  | 0.44299  | -4.0514  | 0.55878  | -0.02179 | 0.00459 | 962.5751 | 43.84941  | 219.7   | 9.42    | 4.29   |
| 52  | 0.4359 | 55.94851 | 0.4827    | -0.18126 | 0.05722  | 0.0096   | 0.00309  | 5.09734  | 1.63238  | -0.33254 | 0.10497  | -0.00128 | 0.00068 | 53.06164 | 1.02195   | 12.83   | 0.25    | 1.95   |
| 53  | 0.4361 | 57033.95 | 60101.752 | 167.7557 | 176.9773 | 170.4093 | 179.5761 | 88.26696 | 0.26245  | 349.1761 | 417.877  | -0.15731 | 0.20717 | 7591.146 | 9076.3207 | 1269.3  | 1089.32 | 85.82  |
| 54  | 0.4366 | 2750.982 | 1916.1452 | 32.44188 | 23.05231 | 2.19221  | 1.53903  | 23.45091 | 2.06868  | 60.92216 | 44.30469 | 1.31536  | 0.92024 | 2155.208 | 1537.5147 | 459.32  | 289.25  | 62.97  |
| 55  | 0.4376 | 1531.002 | 474.35931 | 66.48869 | 20.68903 | 3.4349   | 1.06663  | 65.94047 | 1.38209  | 128.0083 | 41.7943  | 0.02133  | 0.03001 | 547.1331 | 179.27396 | 128.15  | 40.53   | 31.63  |
| 56  | 0.4534 | 372.7022 | 20.30867  | 0.94082  | 0.13655  | 0.23438  | 0.008    | 7.11263  | 0.19242  | 1.72742  | 0.25088  | 0.00097  | 0.00195 | 904.0906 | 18.98277  | 207.09  | 4.11    | 1.98   |
| 57  | 0.4552 | 326.2494 | 63.8479   | 0.63592  | 1.16722  | 0.18958  | 0.05889  | 17.15646 | 4.14367  | 1.16735  | 2.14361  | 0.01024  | 0.01551 | 270.3734 | 54.64837  | 64.46   | 12.8    | 19.86  |
| 58  | 0.4551 | 239.9605 | 1094.7062 | 1.96807  | 43.09731 | 0.02683  | 0.99228  | 3.23704  | 121.2776 | 3.61616  | 79.29791 | 0.08173  | 0.64273 | 232.4874 | 1101.5311 | 55.57   | 259.27  | 466.56 |
| 59  | 0.4555 | 1643.723 | 1115.3429 | 35.12163 | 24.24325 | 1.64046  | 1.12687  | 29.31574 | 3.15502  | 66.08242 | 46.77459 | 0.03712  | 0.07097 | 1191.383 | 830.70879 | 268.21  | 173.76  | 64.79  |
| 60  | 0.4571 | 1945.86  | 381.81772 | 46.68802 | 9.26507  | 2.92592  | 0.57575  | 44.2361  | 0.67211  | 88.58695 | 18.17915 | 0.08632  | 0.02508 | 1122.068 | 228.11283 | 253.65  | 48.1    | 18.96  |
| 61  | 0.4731 | 113.2234 | 2.05392   | 0.03937  | 0.20025  | 0.25738  | 0.00832  | 67.18789 | 1.82342  | 0.07224  | 0.36745  | 0.00203  | 0.00156 | 37.14229 | 2.18441   | 8.99    | 0.53    | 5.90   |
| 62  | 0.474  | 1970.872 | 693.97807 | 13.31767 | 5.70452  | 3.02354  | 1.075    | 45.27801 | 2.23613  | 24.6681  | 10.6671  | 0.04612  | 0.04491 | 1088.724 | 389.57864 | 246.61  | 82.47   | 33.44  |
| 63  | 0.4744 | 2943.983 | 1733.8711 | 55.08442 | 32.88171 | 5.27756  | 3.11666  | 52.81932 | 2.30163  | 105.1633 | 65.31638 | 0.40254  | 0.24409 | 1445.198 | 888.45617 | 320.54  | 180.52  | 56.32  |
| 64  | 0.4887 | 46.94859 | 0.91453   | 1.43687  | 0.1882   | 0.02693  | 0.00914  | 16.71131 | 5.74476  | 2.63915  | 0.34603  | 0.04296  | 0.00269 | 39.11785 | 2.80501   | 9.47    | 0.68    | 7.18   |
| 65  | 0.5107 | 755.1828 | 9.16316   | -0.0188  | 0.11286  | 0.12498  | 0.00435  | 4.89069  | 0.15953  | -0.03449 | 0.20707  | 0.00162  | 0.00135 | 718.2113 | 8.79848   | 166.41  | 1.95    | 1.17   |
| 66  | 0.5248 | 571.9254 | 12.74309  | 0.04889  | 0.18169  | 0.21174  | 0.00977  | 10.94005 | 0.44336  | 0.08971  | 0.33339  | 0.00144  | 0.00187 | 509.3476 | 11.64285  | 119.58  | 2.64    | 2.21   |
| 67  | 0.5275 | 1154.184 | 108.2885  | 0.81451  | 0.9357   | 0.0914   | 0.03614  | 2.33433  | 0.899    | 1.49538  | 1.71887  | 0.01202  | 0.00548 | 1127.861 | 106.39437 | 254.88  | 22.42   | 8.80   |
| 68  | 0.5454 | 58.43438 | 1.03811   | 0.13134  | 0.14258  | 0.02967  | 0.00563  | 14.99128 | 2.8378   | 0.24101  | 0.26166  | 0.00469  | 0.00097 | 49.65368 | 1.87917   | 12.01   | 0.45    | 3.75   |
| 69  | 0.5884 | 54.96102 | 0.46455   | 0.02564  | 0.05697  | 0.05361  | 0.00251  | 28.83538 | 1.33384  | 0.04705  | 0.10454  | 0.00251  | 0.00054 | 39.09238 | 0.80801   | 9.46    | 0.2     | 2.11   |
| 70  | 0.592  | 1101.626 | 84.59711  | 8.86805  | 0.10397  | 0.50151  | 0.04824  | 13.38645 | 0.78035  | 16.3742  | 1.93048  | 0.02906  | 0.00533 | 960.1447 | 74.71191  | 219.18  | 16.06   | 7.33   |
| 71  | 0.5944 | 1004.104 | 104.20117 | 4.33458  | 1.16091  | 1.46668  | 0.15718  | 43.12907 | 1.16199  | 7.97779  | 2.14322  | 0.03626  | 0.00873 | 572.7797 | 60.78451  | 133.94  | 13.7    | 10.23  |
| 72  | 0.598  | 3265.565 | 254.70576 | 52.99751 | 4.20563  | 4.83601  | 0.38031  | 43.62754 | 0.43992  | 101.0242 | 8.32851  | 0.06834  | 0.00916 | 1912.441 | 155.69251 | 413.06  | 30.05   | 7.27   |
| 73  | 0.5994 | 877.1281 | 144.98775 | 11.46374 | 2.48341  | 0.42281  | 0.12083  | 14.13696 | 3.32141  | 21.20606 | 4.63141  | 0.06262  | 0.01466 | 759.2504 | 129.90863 | 175.48  | 28.61   | 16.30  |
| 74  | 0.6009 | 869.7947 | 129.34251 | 8.99304  | 1.98675  | 0.87787  | 0.15214  | 29.74014 | 2.65895  | 16.60645 | 3.69216  | 0.04237  | 0.01368 | 615.0017 | 94.96291  | 143.43  | 21.29   | 14.84  |
| 75  | 0.6127 | 98.65176 | 1.94179   | 1.77149  | 0.1941   | 0.14139  | 0.01008  | 42.21692 | 2.91178  | 3.25451  | 0.35704  | 0.00533  | 0.00176 | 57.05827 | 3.09847   | 13.8    | 0.75    | 5.43   |
| 76  | 0.6154 | 978.3033 | 86.44513  | 0.61319  | 0.77536  | 0.05245  | 0.05245  | 6.65225  | 1.47108  | 1.1256   | 1.42392  | 0.03154  | 0.00765 | 913.592  | 82.04312  | 209.15  | 17.73   | 8.48   |
| 77  | 0.6187 | 138.7022 | 10.2993   | 0.44495  | 0.6133   | 0.14045  | 0.0371   | 29.90325 | 7.59747  | 0.81668  | 1.12603  | 0.02428  | 0.00489 | 97.23675 | 12.80835  | 23.45   | 3.07    | 13.09  |
| 78  | 0.6226 | 71.29629 | 4.88321   | 0.79086  | 0.73894  | 0.16585  | 0.03979  | 67.98415 | 15.90336 | 12.52034 | 1.36895  | 0.04396  | 0.00526 | 22.9266  | 11.52748  | 5.56    | 2.79    | 50.18  |
| 79  | 0.6239 | 98.15261 | 15.9272   | 6.9347   | 1.63791  | 0.17534  | 0.05387  | 52.22191 | 13.85552 | 12.78684 | 3.03499  | 0.02983  | 0.0205  | 47.11205 | 15.738    | 11.4    | 3.8     | 33.33  |
| 80  | 0.6417 | 71.27347 | 0.79706   | 0.47285  | 0.11691  | 0.07963  | 0.00364  | 32.97386 | 1.46755  | 0.86791  | 0.21465  | 0.00632  | 0.00143 | 47.76791 | 1.18782   | 11.56   | 0.28    | 2.42   |
| 81  | 0.657  | 649.7469 | 9.31042   | 0.23286  | 0.08603  | 0.01725  | 0.00485  | 0.78148  | 0.22012  | 0.42733  | 0.15791  | 0.00216  | 0.00132 | 644.7458 | 9.35095   | 150.08  | 2.09    | 1.39   |
| 82  | 0.6725 | 166.6664 | 2.67167   | -0.55009 | 0.08017  | -0.04526 | 0.00396  | -7.99896 | 0.69094  | -1.00895 | 0.14698  | -0.00454 | 0.00113 | 179.896  | 3.10036   | 43.15   | 0.73    | 1.69   |
| 83  | 0.6827 | 1455.864 | 33.49842  | 0.01887  | 0.12228  | 1.34885  | 0.03377  | 27.37845 | 0.27078  | 0.03462  | 0.22437  | -0.00072 | 0.0024  | 1057.263 | 24.64879  | 239.94  | 5.24    | 2.18   |
| 84  | 0.6887 | 107.044  | 53.70244  | 0.16306  | 0.23616  | -0.06089 | 0.01111  | -1.67667 | 0.29411  | 0.29923  | 0.43342  | -0.01148 | 0.00444 | 1092.143 | 54.70554  | 247.33  | 11.58   | 4.68   |
| 85  | 0.6891 | 2594.517 | 1796.4347 | 8.20922  | 7.73703  | 5.12428  | 3.56637  | 58.33481 | 2.77731  | 16.47244 | 14.37697 | 0.11004  | 0.11197 | 1087.852 | 761.50152 | 246.42  | 161.22  | 65.42  |
| 86  | 0.7088 | 46.51895 | 0.90186   | 0.60367  | 0.12702  | 0.02137  | 0.00536  | 13.47399 | 3.39554  | 1.10812  | 0.23236  | 0.00044  | 0.00178 | 40.24246 | 1.76236   | 9.74    | 0.43    | 4.41   |
| 87  | 0.7095 | 7356.63  | 3360.3221 | 21.75934 | 10.45432 | 22.02589 | 10.06308 | 88.44925 | 0.87827  | 40.5485  | 19.78566 | 0.27955  | 0.13669 | 863.0042 | 405.7597  | 198.18  | 88.24   | 44.53  |
| 88  | 0.712  | 1527.183 | 227.32045 | 0.65586  | 0.96256  | 2.36646  | 0.35597  | 45.78671 | 1.00253  | 1.20397  | 1.76781  | 0.03743  | 0.01632 | 828.3039 | 124.32297 | 190.62  | 27.15   | 14.24  |
| 89  | 0.7121 | 1816.123 | 3685.7647 | 4.82757  | 15.74365 | 1.25099  | 2.62165  | 20.33324 | 10.63659 | 8.88823  | 29.08542 | 0.53438  | 1.1089  | 1451.772 | 2962.8493 | 321.87  | 601.57  | 186.90 |
| 90  | 0.7123 | 4558.606 | 10311.477 | 18.06981 | 43.58206 | 2.68968  | 6.16967  | 17.4026  | 6.64181  | 33.58418 | 82.04778 | 0.30413  | 0.74217 | 3813.936 | 8744.1164 | 747.12  | 1402.2  | 187.68 |
| 91  | 0.7126 | 450.7052 | 425.38684 | 62.86543 | 59.70249 | 1.38039  | 1.33741  | 89.3595  | 19.84057 | 120.7085 | 119.9611 | 0.12005  | 0.13789 | 50.18218 | 105.91959 | 12.14   | 25.54   | 210.38 |
| 92  | 0.7127 | 84514.26 | 611894.16 | -38.6475 | 284.0028 | 257.7869 | 1866.413 | 90.13774 | 1.16842  | -69.0288 | 493.784  | 0.10901  | 0.98023 | 8113.567 | 57191.548 | 1330.93 | 6633.24 | 498.39 |
| 93  | 0.7216 | 138.5508 | 6.14463   | 1.66927  | 0.30577  | 0.19705  | 0.01815  | 41.93631 | 3.3966   | 0.30649  | 0.56237  | 0.01466  | 0.00302 | 80.5254  | 5.91943   | 19.44   | 1.42    | 7.30   |
| 94  | 0.7316 | 1047.762 | 36.64608  | 1.93529  | 0.23397  | 0.3295   | 0.0164   | 9.27779  | 0.32926  | 3.55586  | 0.43048  | 0.00091  | 0.00304 | 951.8267 | 33.51672  | 217.39  | 7.21    | 3.32   |
| 95  | 0.7479 | 426.7763 | 11.48477  | 0.55489  | 0.14275  | 0.05766  | 0.00718  | 3.98224  | 0.48576  | 0.10185  | 0.26213  | 0.00342  | 0.00184 | 409.9132 | 11.2316   | 96.85   | 2.58    | 2.66   |
| 96  | 0.749  | 1485.743 | 469.88235 | 2.78655  | 2.54449  | 1.37807  | 0.44848  | 27.39353 | 2.10493  | 5.12301  | 4.68722  | 0.0446   | 0.02963 | 1080.851 | 343.95623 | 244.94  | 72.88   | 29.75  |
| 97  | 0.7712 | 179.6775 | 10.18409  | 0.09811  | 0.11996  | 0.026    | 0.00514  | 1.32421  | 0.26105  | 0.18003  | 0.22013  | 0.00116  | 0.00116 | 572.0117 | 10.16416  | 133.76  | 2.29    | 1.71   |
| 98  | 0.7885 | 65.89811 | 1.20156   | 0.18438  | 0.15253  | 0.03569  | 0.00692  | 15.99045 | 3.0913   | 0.33835  | 0.27995  | -0.00023 | 0.0014  | 55.34296 | 2.27402   | 13.38   | 0.55    | 4.11   |
| 99  | 0.8151 | 447.0946 | 5.71993   | 0.04326  | 0.10978  | 0.0236   | 0.0055   | 1.55931  | 0.36307  | 0.07937  | 0.20144  | -0.00123 | 0.00123 | 440.1072 | 5.86062   | 103.79  | 1.34    | 1.29   |
| 100 | 0.8211 | 96.1286  | 5.69475   | 0.35208  | 0.41913  | 0.16563  | 0.0208   | 50.90181 | 5.64586  | 0.64617  | 0.76942  | 0.00278  | 0.00419 | 47.19456 | 6.11029   | 11.42   | 1.47    | 12.87  |
| 101 | 0.8289 | 56.49367 | 2.55137   | 0.19109  | 0.32716  | 0.01914  | 0.01351  | 9.98939  | 7.05522  | 0.35066  | 0.60045  | 0.00206  | 0.00288 | 50.83043 | 4.60002   | 12.3    | 1.11    | 9.02   |
| 102 | 0.8414 | 1296.253 | 39.48257  | -0.09331 | 0.20174  | 0.055    | 0.01077  | 1.25434  | 0.24251  | -0.1712  | 0.37012  | -0.00146 | 0.00194 | 1279.88  | 39.10932  | 286.63  | 8.1     | 2.83   |
| 103 | 0.8462 | 662.227  | 43.01947  | 1.84036  | 0.47695  | 0.21863  | 0.02375  | 9.73344  | 0.8495   | 3.3812   | 0.87741  | 0.05812  | 0.00807 | 598.5207 | 39.34     |         |         |        |

|    |        |          |           |          |          |         |         |          |          |          |          |          |         |          |           |        |        |        |
|----|--------|----------|-----------|----------|----------|---------|---------|----------|----------|----------|----------|----------|---------|----------|-----------|--------|--------|--------|
| 11 | 0.1059 | 772.339  | 10.57089  | 0.04148  | 0.02265  | 0.07957 | 0.00583 | 3.0441   | 0.21933  | 0.07611  | 0.04156  | 0.00112  | 0.00145 | 748.8214 | 10.38908  | 173.18 | 2.29   | 1.32   |
| 12 | 0.1085 | 679.1433 | 23.6188   | 0.71588  | 0.05273  | 0.04641 | 0.00909 | 2.01077  | 0.38923  | 1.31421  | 0.09685  | -0.00043 | 0.003   | 665.7948 | 23.31943  | 154.78 | 5.19   | 3.35   |
| 13 | 0.1174 | 701.4876 | 9.30323   | 0.25065  | 0.01446  | 0.06841 | 0.00313 | 2.87886  | 0.12631  | 0.45999  | 0.02654  | 0.00124  | 0.00112 | 681.3845 | 9.08222   | 158.25 | 2.02   | 1.28   |
| 14 | 0.1217 | 849.008  | 19.71558  | 0.23892  | 0.03216  | 0.31909 | 0.00926 | 11.10397 | 0.1937   | 0.43847  | 0.05903  | 0.00004  | 0.00231 | 754.8354 | 17.61009  | 174.5  | 3.88   | 2.22   |
| 15 | 0.1511 | 330.7053 | 1.28322   | 0.0366   | 0.00434  | 0.071   | 0.00133 | 6.34373  | 0.1165   | 0.06715  | 0.00796  | 0.00123  | 0.00038 | 309.7065 | 1.26301   | 73.65  | 0.29   | 0.39   |
| 16 | 0.1709 | 31.07322 | 0.18278   | 0.02566  | 0.00686  | 0.04975 | 0.00122 | 47.34637 | 1.12714  | 0.04709  | 0.01259  | 0.00379  | 0.00056 | 16.34583 | 0.3633    | 3.96   | 0.09   | 2.27   |
| 17 | 0.1892 | 189.4818 | 1.2131    | 0.01894  | 0.00566  | 0.10259 | 0.00139 | 16.00098 | 0.19191  | 0.03475  | 0.01039  | 0.00096  | 0.00053 | 159.14   | 1.08279   | 38.22  | 0.26   | 0.68   |
| 18 | 0.2101 | 86.33966 | 0.56956   | 0.07099  | 0.00588  | 0.03796 | 0.00152 | 12.98895 | 0.51331  | 0.13026  | 0.01079  | 0.00059  | 0.00051 | 75.10297 | 0.66917   | 18.14  | 0.16   | 0.88   |
| 19 | 0.2234 | 152.6495 | 0.94358   | 0.00644  | 0.00898  | 0.07013 | 0.00243 | 13.57717 | 0.46445  | 0.01181  | 0.01648  | 0.00141  | 0.00065 | 131.8989 | 1.08959   | 31.74  | 0.26   | 0.82   |
| 20 | 0.2267 | 678.8907 | 14.63218  | -0.00765 | 0.03595  | 0.00242 | 0.00794 | 0.10544  | 0.34555  | -0.01403 | 0.06596  | -0.00065 | 0.00214 | 678.1415 | 14.8038   | 157.52 | 3.29   | 2.09   |
| 21 | 0.2289 | 1216.492 | 48.6371   | 0.12828  | 0.06288  | 0.08873 | 0.01292 | 2.15466  | 0.30178  | 0.23539  | 0.1154   | 0.00241  | 0.00336 | 1190.36  | 47.73935  | 268    | 9.99   | 3.73   |
| 22 | 0.2413 | 570.5696 | 4.24641   | 0.05436  | 0.01077  | 0.26965 | 0.00308 | 13.96539 | 0.12135  | 0.09975  | 0.01976  | 0.00272  | 0.00073 | 490.8806 | 3.72064   | 115.38 | 0.85   | 0.74   |
| 23 | 0.2477 | 689.9221 | 10.79079  | 0.56144  | 0.02166  | 0.10667 | 0.00469 | 4.56225  | 0.18771  | 1.03058  | 0.03978  | 0.00077  | 0.00141 | 658.679  | 10.38817  | 153.19 | 2.32   | 1.51   |
| 24 | 0.2538 | 57.99429 | 0.78707   | 0.0447   | 0.02167  | 0.11573 | 0.00555 | 58.99147 | 2.71569  | 0.08201  | 0.03977  | 0.00597  | 0.0014  | 23.77118 | 1.60865   | 5.76   | 0.39   | 6.77   |
| 25 | 0.2551 | 102.7119 | 6.56009   | 4.00427  | 0.2806   | 0.24835 | 0.02557 | 71.15035 | 5.80184  | 7.36812  | 0.51779  | 0.02945  | 0.00645 | 29.70748 | 6.28198   | 7.2    | 1.52   | 21.11  |
| 26 | 0.2683 | 732.6105 | 5.85289   | 0.17784  | 0.0113   | 0.03975 | 0.00299 | 1.60121  | 0.12012  | 0.32634  | 0.02073  | -0.00011 | 0.00069 | 720.9411 | 5.82773   | 167.02 | 1.29   | 0.77   |
| 27 | 0.2748 | 766.905  | 15.35811  | 0.71785  | 0.03035  | 0.04903 | 0.00466 | 1.88148  | 0.17546  | 1.31782  | 0.05575  | -0.00042 | 0.00118 | 752.8283 | 15.14455  | 174.06 | 3.34   | 1.92   |
| 28 | 0.2757 | 756.1146 | 81.21572  | 3.61972  | 0.4326   | 0.21398 | 0.03629 | 8.3235   | 1.09788  | 6.6587   | 0.79784  | 0.00219  | 0.00844 | 694.9287 | 75.30035  | 161.25 | 16.71  | 10.36  |
| 29 | 0.291  | 739.5357 | 4.63821   | 0.03612  | 0.01044  | 0.3525  | 0.00373 | 14.0853  | 0.12038  | 0.06629  | 0.01916  | 0.0016   | 0.00059 | 635.3605 | 4.08625   | 147.98 | 0.91   | 0.61   |
| 30 | 0.2917 | 577.1816 | 85.33232  | 9.73311  | 1.45689  | 1.62674 | 0.24506 | 83.1498  | 2.42739  | 17.98253 | 2.71032  | 0.0049   | 0.01136 | 97.92436 | 20.30435  | 23.62  | 4.86   | 20.58  |
| 31 | 0.2962 | 802.9267 | 16.6025   | 0.1152   | 0.03173  | 0.03746 | 0.00689 | 1.37753  | 0.25197  | 0.2114   | 0.05824  | -0.00144 | 0.00203 | 791.9013 | 16.5011   | 182.65 | 3.62   | 1.98   |
| 32 | 0.3014 | 61.86337 | 1.60578   | 1.94436  | 0.04562  | 0.13337 | 0.00628 | 63.47602 | 2.75836  | 3.57254  | 0.08394  | 0.01185  | 0.00166 | 22.61518 | 1.76287   | 5.48   | 0.43   | 7.85   |
| 33 | 0.3225 | 178.3241 | 1.26065   | 0.00869  | 0.00755  | 0.00179 | 0.00137 | 0.29631  | 0.2278   | 0.01594  | 0.01385  | 0.00126  | 0.00051 | 177.7672 | 1.32093   | 42.64  | 0.31   | 0.73   |
| 34 | 0.3258 | 246.0369 | 6.75687   | 1.87521  | 0.0769   | 0.0377  | 0.00957 | 4.46611  | 1.14329  | 3.44531  | 0.14147  | 0.01239  | 0.00277 | 235.3319 | 7.05984   | 56.24  | 1.66   | 2.95   |
| 35 | 0.3878 | 32.04544 | 0.0859    | 0.02204  | 0.00224  | 0.02716 | 0.00098 | 25.06487 | 0.90177  | 0.04044  | 0.00412  | 0.00219  | 0.00016 | 23.99141 | 0.29834   | 5.81   | 0.07   | 1.20   |
| 36 | 0.3905 | 783.4556 | 26.77737  | 1.43011  | 0.07265  | 0.16309 | 0.01403 | 6.13638  | 0.48587  | 2.6267   | 0.13358  | 0.0004   | 0.00355 | 736.0953 | 25.47896  | 170.37 | 5.63   | 3.30   |
| 37 | 0.4133 | 318.3456 | 1.40061   | 0.01625  | 0.00508  | 0.29897 | 0.00206 | 27.75333 | 0.14839  | 0.02981  | 0.00932  | 0.00416  | 0.00046 | 229.9753 | 1.11994   | 54.98  | 0.26   | 0.47   |
| 38 | 0.4147 | 406.9167 | 23.71343  | 0.91888  | 0.10791  | 0.03612 | 0.01473 | 2.60442  | 0.15903  | 0.68712  | 0.19825  | -0.00221 | 0.00606 | 396.5473 | 23.52471  | 93.78  | 5.42   | 5.78   |
| 39 | 0.4179 | 646.3578 | 18.27498  | 0.58636  | 0.03901  | 0.1623  | 0.00866 | 7.41306  | 0.33624  | 1.07633  | 0.07164  | 0.00021  | 0.00255 | 598.6633 | 17.07963  | 139.76 | 3.84   | 2.75   |
| 40 | 0.4409 | 42.11872 | 0.2503    | 0.06362  | 0.00701  | 0.06797 | 0.00105 | 47.70865 | 0.6953   | 0.11674  | 0.01285  | 0.00101  | 0.00045 | 22.00991 | 0.32724   | 5.33   | 0.08   | 1.50   |
| 41 | 0.4488 | 574.6797 | 6.06668   | 0.38698  | 0.0159   | 0.01395 | 0.00365 | 0.71192  | 0.18775  | 0.71025  | 0.02918  | -0.00095 | 0.00125 | 570.7149 | 6.12272   | 133.47 | 1.38   | 1.03   |
| 42 | 0.4492 | 140.3471 | 32.36918  | 42.41185 | 9.77593  | 0.36318 | 0.12243 | 73.9917  | 18.85116 | 80.22273 | 19.06229 | 1.03903  | 0.24124 | 37.62122 | 28.72202  | 9.11   | 6.94   | 76.18  |
| 43 | 0.4577 | 107.6099 | 0.99248   | 0.31071  | 0.01635  | 0.2701  | 0.00503 | 74.16606 | 1.22695  | 0.57023  | 0.03001  | 0.00098  | 0.00028 | 27.7983  | 1.35445   | 6.74   | 0.33   | 4.40   |
| 44 | 0.4636 | 1285.169 | 20.82074  | 0.03216  | 0.02679  | 0.11552 | 0.00471 | 2.656    | 0.09952  | 0.059    | 0.04915  | 0.00144  | 0.00149 | 1251.035 | 20.30937  | 280.65 | 4.22   | 1.50   |
| 45 | 0.4678 | 99.73549 | 1.93581   | 0.79764  | 0.03735  | 0.08707 | 0.00709 | 25.73986 | 2.03991  | 1.46439  | 0.06861  | 0.01075  | 0.00194 | 74.08341 | 2.49399   | 17.89  | 0.6    | 3.35   |
| 46 | 0.4929 | 290.3055 | 0.98055   | 0.00806  | 0.00585  | 0.0444  | 0.00118 | 4.52017  | 0.11869  | 0.01479  | 0.01073  | 0.00061  | 0.00036 | 277.1564 | 0.99826   | 66.05  | 0.23   | 0.35   |
| 47 | 0.502  | 554.3487 | 6.98669   | 0.03643  | 0.01712  | 0.06386 | 0.00292 | 3.40387  | 0.14968  | 0.06684  | 0.03142  | -0.00004 | 0.00086 | 535.4645 | 6.8003    | 125.51 | 1.54   | 1.23   |
| 48 | 0.5165 | 186.1358 | 0.10102   | 0.52766  | 0.01201  | 0.09076 | 0.00234 | 14.38811 | 0.3631   | 0.96855  | 0.02205  | 0.00332  | 0.00058 | 159.3884 | 1.09884   | 38.28  | 0.26   | 0.68   |
| 49 | 0.5253 | 116.0894 | 1.25961   | 0.01701  | 0.01842  | 0.13663 | 0.00447 | 34.78708 | 1.07872  | 0.03121  | 0.0338   | 0.00164  | 0.00096 | 75.68681 | 1.50585   | 18.28  | 0.36   | 1.97   |
| 50 | 0.5254 | 2168.326 | 1605.6181 | 53.31076 | 39.50119 | 5.66411 | 4.20418 | 76.98892 | 3.95593  | 101.6447 | 78.26121 | 0.02598  | 0.0655  | 518.4685 | 408.81366 | 121.65 | 92.76  | 76.25  |
| 51 | 0.527  | 833.0651 | 42.63734  | 5.848    | 0.31745  | 0.77481 | 0.04493 | 27.42662 | 0.75493  | 10.77477 | 0.58732  | 0.04182  | 0.00496 | 607.0692 | 31.85703  | 141.65 | 7.15   | 5.05   |
| 52 | 0.5417 | 815.7206 | 7.08919   | 0.0153   | 0.00956  | 0.04795 | 0.00234 | 1.73687  | 0.08347  | 0.02808  | 0.01753  | -0.00038 | 0.00045 | 801.532  | 6.99969   | 184.76 | 1.53   | 0.83   |
| 53 | 0.5499 | 173.7484 | 2.15279   | 1.32748  | 0.02559  | 0.51814 | 0.0089  | 88.07363 | 1.06431  | 2.43803  | 0.04704  | 0.00166  | 0.00088 | 20.73779 | 1.87198   | 5.03   | 0.45   | 8.95   |
| 54 | 0.5878 | 518.8812 | 2.18241   | 0.04558  | 0.00344  | 0.01873 | 0.0012  | 1.06621  | 0.06796  | 0.08363  | 0.00632  | 0.00009  | 0.0002  | 513.336  | 2.1881    | 120.49 | 0.5    | 0.41   |
| 55 | 0.5879 | 1740.705 | 2807.8576 | 37.69068 | 60.85912 | 1.96838 | 3.21897 | 33.23705 | 9.01505  | 71.04836 | 117.8589 | -0.00972 | 0.15918 | 1193.906 | 1985.1778 | 268.74 | 415.13 | 154.47 |
| 56 | 0.5896 | 1114.608 | 71.62757  | 6.27037  | 0.022    | 6.80462 | 0.38336 | 11.55645 | 0.78083  | 0.00349  | 0.00571  | 0.00435  | 0.00571 | 1043.356 | 67.49129  | 236.98 | 14.36  | 6.00   |
| 57 | 0.5926 | 62.41602 | 2.60793   | 0.67796  | 0.06255  | 0.04271 | 0.01129 | 20.14173 | 5.28578  | 1.24455  | 0.11488  | 0.00095  | 0.003   | 49.84451 | 3.91276   | 12.06  | 0.94   | 7.79   |
| 58 | 0.6003 | 582.6487 | 9.773     | 0.29923  | 0.02529  | 0.51152 | 0.00961 | 25.93988 | 0.22019  | 0.54915  | 0.04642  | 0.00828  | 0.00148 | 431.5796 | 7.35642   | 101.83 | 1.69   | 1.66   |
| 59 | 0.6033 | 39.16217 | 1.50811   | 0.06233  | 0.0588   | 0.06178 | 0.01455 | 46.63955 | 10.86878 | 0.11437  | 0.1079   | 0.00861  | 0.00368 | 20.88219 | 4.34346   | 5.06   | 1.05   | 20.75  |
| 60 | 0.6106 | 518.6473 | 9.6806    | 0.42916  | 0.02816  | 0.0736  | 0.00459 | 4.18665  | 0.2494   | 0.78768  | 0.0517   | 0.00434  | 0.00147 | 497.0556 | 9.37108   | 116.79 | 2.13   | 1.82   |
| 61 | 0.6147 | 93.43004 | 1.83585   | 0.89811  | 0.02989  | 0.25702 | 0.00919 | 81.23668 | 2.44877  | 1.64895  | 0.05491  | 0.00938  | 0.00197 | 17.53613 | 2.31892   | 4.25   | 0.56   | 13.18  |
| 62 | 0.6215 | 1030.201 | 14.97251  | 0.17714  | 0.01606  | 0.04503 | 0.00377 | 1.29035  | 0.1065   | 0.32506  | 0.02948  | 0.00232  | 0.00114 | 1017.006 | 14.82385  | 231.36 | 3.16   | 1.37   |
| 63 | 0.6237 | 45.63405 | 1.57438   | 2.39099  | 0.11023  | 0.09113 | 0.01179 | 58.6191  | 7.37456  | 4.39456  | 0.20294  | 0.04199  | 0.00398 | 18.90343 | 3.43565   | 4.58   | 0.83   | 18.12  |
| 64 | 0.6387 | 906.3423 | 5.88017   | 0.52279  | 0.01087  | 0.05693 | 0.00191 | 1.8513   | 0.06115  | 0.95959  | 0.01995  | 0.00104  | 0.0005  | 889.8626 | 5.80256   | 204.01 | 1.26   | 0.62   |
| 65 | 0.6547 | 203.8752 | 1.0126    | 0.03975  | 0.00657  | 0.19124 | 0.00259 | 27.7216  | 0.34897  | 0.07294  | 0.01205  | 0.00598  | 0.00057 | 147.3404 | 1.02212   | 35.42  | 0.24   | 0.68   |
| 66 | 0.6851 | 502.7685 | 1.86669   | 0.03614  | 0.00388  | 0.02884 | 0.00081 | 1.69435  | 0.04729  | 0.06631  | 0.00712  | 0.00288  | 0.00028 | 494.2332 | 1.85088   | 116.15 | 0.42   | 0.36   |
| 67 | 0      |          |           |          |          |         |         |          |          |          |          |          |         |          |           |        |        |        |

|     |        |          |           |          |         |          |         |          |          |          |         |          |         |          |           |        |       |       |
|-----|--------|----------|-----------|----------|---------|----------|---------|----------|----------|----------|---------|----------|---------|----------|-----------|--------|-------|-------|
| 102 | 0.9129 | 441.6029 | 180.31871 | -0.66259 | 0.84979 | 1.19758  | 0.50699 | 80.1544  | 8.98812  | -1.2152  | 1.55779 | 0.11263  | 0.06055 | 87.59185 | 53.43524  | 21.14  | 12.82 | 60.64 |
| 103 | 0.9136 | 948.5945 | 129.95377 | 30.90664 | 4.24971 | 0.1475   | 0.04807 | 4.32629  | 1.3589   | 57.97483 | 8.1495  | 0.08886  | 0.02214 | 927.7781 | 130.60951 | 212.21 | 28.18 | 13.28 |
| 104 | 0.9181 | 53.47403 | 1.13107   | 0.19878  | 0.04057 | 0.09964  | 0.00976 | 55.05949 | 5.27474  | 0.36479  | 0.07447 | 0.01084  | 0.00232 | 24.02153 | 2.8675    | 5.82   | 0.69  | 11.86 |
| 105 | 0.93   | 55.55635 | 0.60446   | 0.01302  | 0.01585 | 0.14782  | 0.0044  | 66.65822 | 1.89132  | 0.0239   | 0.02908 | 0.00094  | 0.00094 | 21.84796 | 1.2576    | 5.3    | 0.3   | 5.66  |
| 106 | 0.9437 | 1382.466 | 12.68815  | 0.00173  | 0.01462 | 0.09492  | 0.00372 | 2.02884  | 0.07731  | 0.00317  | 0.02683 | -0.00026 | 0.00082 | 1354.39  | 12.47716  | 301.99 | 2.56  | 0.85  |
| 107 | 0.9453 | 176.9998 | 12.57622  | 11.0796  | 0.79846 | 0.15337  | 0.02292 | 25.09268 | 3.37931  | 20.48987 | 1.48826 | 0.02163  | 0.00745 | 133.6092 | 11.34528  | 32.14  | 2.71  | 8.43  |
| 108 | 0.9479 | 121.2832 | 5.70904   | 1.3172   | 0.07606 | 0.31829  | 0.01716 | 77.48    | 2.64661  | 2.41913  | 0.13983 | 0.01174  | 0.00386 | 27.33171 | 3.41472   | 6.62   | 0.83  | 12.54 |
| 109 | 0.9501 | 961.0961 | 63.36524  | 2.826    | 0.20969 | 0.15113  | 0.01887 | 4.6226   | 0.49278  | 5.19569  | 0.38629 | 0.00671  | 0.00473 | 918.4732 | 60.86499  | 210.2  | 13.15 | 6.26  |
| 110 | 0.9601 | 46.70784 | 0.70473   | 0.07862  | 0.0186  | 0.08778  | 0.0029  | 55.55773 | 1.63626  | 0.14427  | 0.03414 | 0.00373  | 0.00084 | 20.74598 | 0.82788   | 5.03   | 0.2   | 3.98  |
| 111 | 0.962  | 911.3722 | 68.63001  | 1.80461  | 0.17028 | 0.08387  | 0.01616 | 2.70308  | 0.48253  | 3.31543  | 0.31324 | 0.01247  | 0.00548 | 887.8397 | 67.0913   | 203.57 | 14.55 | 7.15  |
| 112 | 0.9653 | 732.2648 | 31.51877  | 0.12064  | 0.06153 | -0.00492 | 0.0084  | -0.20009 | 0.33897  | 0.22138  | 0.11292 | 0.00412  | 0.00279 | 733.7627 | 31.68452  | 169.85 | 7     | 4.12  |
| 113 | 0.9672 | 883.9626 | 62.29705  | 2.0803   | 0.18726 | 0.0416   | 0.01793 | 1.37137  | 0.59134  | 3.82268  | 0.34461 | 0.00184  | 0.00468 | 873.0936 | 61.84618  | 200.37 | 13.43 | 6.70  |
| 114 | 0.9682 | -22.6056 | 3.21959   | 3.54624  | 0.49148 | -0.19108 | 0.04105 | 250.7416 | 45.00953 | 6.5232   | 0.90633 | 0.00433  | 0.00915 | 34.20642 | 10.7356   | 8.28   | 2.59  | 31.28 |
| 115 | 0.9764 | 50.39663 | 0.86551   | 0.25816  | 0.0221  | 0.10586  | 0.00673 | 62.0654  | 3.80431  | 0.47378  | 0.04057 | 0.0065   | 0.00127 | 19.10998 | 1.94605   | 4.63   | 0.47  | 10.15 |
| 116 | 0.9793 | 733.5498 | 31.69665  | 0.30695  | 0.07401 | 0.08368  | 0.01526 | 3.36754  | 0.59752  | 0.56332  | 0.13585 | 0.00323  | 0.00366 | 708.9722 | 30.957    | 164.37 | 6.86  | 4.17  |
| 117 | 0.9818 | 81.23368 | 3.79987   | 2.94318  | 0.15863 | 0.17171  | 0.02042 | 62.18499 | 6.84535  | 5.41158  | 0.29228 | 0.03544  | 0.0044  | 30.77128 | 5.76075   | 7.45   | 1.39  | 18.66 |
| 118 | 0.9825 | 469.7057 | 80.45459  | 0.26565  | 0.26974 | 1.48993  | 0.26901 | 93.73558 | 5.36265  | 0.48752  | 0.49512 | 0.01848  | 0.01623 | 29.42801 | 25.69592  | 7.13   | 6.21  | 87.10 |
| 119 | 0.9909 | 83.23566 | 1.39603   | 0.62309  | 0.02841 | 0.22454  | 0.00712 | 79.68369 | 2.15015  | 1.14379  | 0.05217 | 0.00484  | 0.00125 | 16.91182 | 1.81355   | 4.1    | 0.44  | 10.73 |
| 120 | 0.9987 | 107.9881 | 1.65654   | 0.26836  | 0.02364 | 0.28549  | 0.00865 | 78.1242  | 2.04643  | 0.4925   | 0.0434  | 0.00344  | 0.00148 | 23.62124 | 2.2408    | 5.72   | 0.54  | 9.44  |
| 121 | 1      | 59.43764 | 4.92864   | 3.82015  | 0.34073 | 0.14594  | 0.03118 | 72.0639  | 14.38871 | 7.02842  | 0.62859 | 0.01189  | 0.00802 | 16.64118 | 8.70357   | 4.04   | 2.11  | 52.23 |

Integrated 404.3971 0.47647 0.47747 0.00195 0.12902 0.00042 9.41889 0.02894 0.87639 0.00359 0.00374 0.00011 366.404 0.44766 86.82 1.73 1.99

# NIZINA RIVER

Weighted average of J from standards = 1.347e-04 2.749e-06

| Grain # | Cumulative 40Ar/39Ar<br>39Ar |          | 40Ar/39Ar<br>meas. | 37Ar/39Ar<br>meas. | 36Ar/39Ar<br>meas. | % Atm.<br>40Ar | Ca/K      | Cl/K     | 40*/39K  | Age<br>(Ma) | %error<br>(Ma) |          |         |          |           |        |       |         |
|---------|------------------------------|----------|--------------------|--------------------|--------------------|----------------|-----------|----------|----------|-------------|----------------|----------|---------|----------|-----------|--------|-------|---------|
| 1       | 0.008                        | 748.7954 | 9.28778            | 0.34071            | 0.09186            | 0.11688        | 0.00625   | 4.60889  | 0.23984  | 0.6253      | 0.16864        | 0.00054  | 0.00135 | 714.4278 | 9.0448    | 165.58 | 2     | 1.21    |
| 2       | 0.0145                       | 1124.776 | 16.36735           | 1.35857            | 0.11714            | 0.16161        | 0.01037   | 4.23587  | 0.26534  | 2.49519     | 0.21534        | -0.00007 | 0.00234 | 1078.138 | 15.98663  | 244.37 | 3.39  | 1.39    |
| 3       | 0.019                        | 1103.424 | 25.239             | 1.05002            | 0.1751             | 0.13524        | 0.01115   | 3.61409  | 0.28704  | 1.92808     | 0.32176        | 0.00452  | 0.00288 | 1064.305 | 24.57266  | 241.43 | 5.22  | 2.16    |
| 4       | 0.0382                       | 62.96468 | 0.39201            | 0.23281            | 0.03517            | 0.0409         | 0.00225   | 19.17234 | 1.04866  | 0.42724     | 0.06455        | 0.00354  | 0.0006  | 50.87724 | 0.73532   | 12.31  | 0.18  | 1.46    |
| 5       | 0.0577                       | 734.7071 | 6.07909            | 0.14751            | 0.0341             | 0.0965         | 0.00362   | 3.87958  | 0.14211  | 0.27069     | 0.06257        | 0.00141  | 0.00071 | 706.2485 | 5.93763   | 163.77 | 1.32  | 0.81    |
| 6       | 0.0756                       | 48.42061 | 0.50696            | 0.38588            | 0.04113            | 0.0765         | 0.00234   | 46.64857 | 1.34621  | 0.70824     | 0.0755         | 0.00512  | 0.00064 | 25.82429 | 0.70619   | 6.26   | 0.17  | 2.72    |
| 7       | 0.0883                       | 118.9041 | 1.34937            | 0.74727            | 0.07068            | 0.28109        | 0.00838   | 69.82129 | 1.93138  | 1.37187     | 0.12982        | 0.00211  | 0.00108 | 35.89372 | 2.33616   | 8.69   | 0.56  | 6.44    |
| 8       | 0.1002                       | 63.11723 | 0.60707            | 0.0905             | 0.06326            | 0.0826         | 0.00534   | 38.67881 | 2.47331  | 0.16607     | 0.1161         | 0.0019   | 0.00113 | 38.68849 | 1.60588   | 9.37   | 0.39  | 4.16    |
| 9       | 0.1098                       | 235.8654 | 2.34108            | 0.92815            | 0.10602            | 0.71511        | 0.01181   | 89.57049 | 1.20945  | 1.70415     | 0.19478        | 0.00646  | 0.00173 | 24.61265 | 2.87188   | 5.96   | 0.69  | 11.58   |
| 10      | 0.1115                       | 51.94149 | 3.84336            | 1.06498            | 0.50536            | 0.06636        | 0.04217   | 37.60714 | 23.8466  | 1.95557     | 0.92867        | 0.00371  | 0.00751 | 32.41364 | 12.62552  | 7.85   | 3.05  | 38.85   |
| 11      | 0.1192                       | 52.7368  | 0.7214             | 0.44165            | 0.13343            | 0.08202        | 0.00842   | 45.91512 | 4.68319  | 0.81063     | 0.24498        | 0.00112  | 0.00175 | 28.51547 | 2.50166   | 6.91   | 0.6   | 8.68    |
| 12      | 0.122                        | 55.0319  | 2.00855            | 1.06884            | 0.2893             | 0.03355        | 0.02155   | 17.86453 | 11.56248 | 1.96266     | 0.53163        | 0.0073   | 0.00454 | 45.21046 | 6.57843   | 10.94  | 1.59  | 14.53   |
| 13      | 0.1297                       | 69.41123 | 1.42947            | 0.59782            | 0.12099            | 0.13156        | 0.00664   | 55.95962 | 2.58529  | 1.09739     | 0.22218        | 0.00032  | 0.00136 | 30.5688  | 1.9043    | 7.41   | 0.46  | 6.21    |
| 14      | 0.1303                       | 1677.345 | 321.20846          | 13.71022           | 3.0035             | 3.07957        | 0.59845   | 54.18669 | 1.80454  | 25.40231    | 5.6193         | 0.02048  | 0.01901 | 775.9467 | 153.16632 | 179.15 | 33.66 | 18.79   |
| 15      | 0.1316                       | 1145.529 | 102.42012          | 0.68461            | 0.5912             | 0.47012        | 0.05579   | 12.12265 | 0.94691  | 1.25677     | 1.08583        | 0.01087  | 0.00824 | 1007.121 | 90.75056  | 229.25 | 19.4  | 8.46    |
| 16      | 0.1572                       | 235.0038 | 1.50803            | 0.25546            | 0.0351             | 0.63262        | 0.00564   | 79.54818 | 0.49396  | 0.46882     | 0.06443        | 0.00483  | 0.00064 | 48.06516 | 1.20258   | 11.63  | 0.29  | 2.49    |
| 17      | 0.1681                       | 1156.191 | 15.8801            | 3.6648             | 0.11036            | 0.21085        | 0.00769   | 5.36292  | 0.18215  | 6.74185     | 0.20355        | 0.00356  | 0.00145 | 1096.996 | 15.2544   | 248.36 | 3.23  | 1.30    |
| 18      | 0.1795                       | 103.3487 | 1.61103            | 1.04912            | 0.08588            | 0.23289        | 0.00711   | 66.52361 | 1.75507  | 1.92641     | 0.15782        | 0.00206  | 0.00106 | 34.61312 | 1.89592   | 8.38   | 0.46  | 5.49    |
| 19      | 0.2062                       | 52.65047 | 0.25547            | 0.52174            | 0.04               | 0.07782        | 0.00179   | 43.62065 | 0.98799  | 0.95767     | 0.07344        | 0.00274  | 0.00061 | 29.67819 | 0.54291   | 7.19   | 0.13  | 1.81    |
| 20      | 0.2063                       | 665.6647 | 579.57043          | 13.78025           | 13.09805           | 1.444          | 1.30142   | 63.93378 | 14.9495  | 25.53334    | 24.50781       | 0.08788  | 0.1353  | 242.4288 | 235.71223 | 57.91  | 55.41 | 95.68   |
| 21      | 0.227                        | 28.1453  | 0.15482            | 0.02791            | 0.03378            | 0.02464        | 0.00231   | 25.89246 | 2.42602  | 0.05122     | 0.06199        | 0.00109  | 0.00072 | 20.83619 | 0.69264   | 5.05   | 0.17  | 3.37    |
| 22      | 0.2313                       | 184.4722 | 4.23517            | 0.64312            | 0.15206            | 0.49706        | 0.0163    | 79.6068  | 1.87715  | 1.18056     | 0.27926        | 0.01484  | 0.00369 | 37.63081 | 3.57642   | 9.11   | 0.86  | 9.44    |
| 23      | 0.2344                       | 1755.229 | 57.80141           | 0.37066            | 0.2556             | 0.143          | 0.01366   | 2.40571  | 0.21594  | 0.68029     | 0.46923        | 0.00796  | 0.00462 | 1713.423 | 56.56884  | 374.23 | 11.16 | 2.98    |
| 24      | 0.249                        | 88.60045 | 1.13766            | 0.70395            | 0.04862            | 0.21198        | 0.00487   | 70.65655 | 1.35377  | 1.29229     | 0.0893         | 0.00275  | 0.00111 | 26.00264 | 1.24716   | 6.3    | 0.3   | 4.76    |
| 25      | 0.2538                       | 657.4016 | 34.64922           | 9.05498            | 0.57379            | 0.87046        | 0.04661   | 39.01516 | 0.38943  | 16.72157    | 1.06643        | 0.0251   | 0.00468 | 403.4774 | 21.58362  | 95.37  | 4.97  | 5.21    |
| 26      | 0.2558                       | 923.5996 | 52.85456           | 6.44551            | 0.54046            | 0.70154        | 0.05004   | 22.38867 | 0.96084  | 11.88069    | 1.00077        | 0.0243   | 0.00608 | 720.0728 | 42.3799   | 166.83 | 9.38  | 5.62    |
| 27      | 0.2672                       | 52.87912 | 0.58541            | 0.1425             | 0.05582            | 0.06313        | 0.00382   | 35.27578 | 2.10431  | 0.2615      | 0.10245        | 0.00177  | 0.00104 | 34.20982 | 1.17758   | 8.29   | 0.28  | 3.38    |
| 28      | 0.275                        | 1079.713 | 23.4885            | 1.07796            | 0.13556            | 0.29376        | 0.0105    | 8.03173  | 0.22792  | 1.97942     | 0.24911        | 0.01126  | 0.00188 | 993.7222 | 21.77565  | 226.38 | 4.66  | 2.06    |
| 29      | 0.2805                       | 48.74169 | 1.22798            | 1.4688             | 0.11611            | 0.06517        | 0.01148   | 39.28635 | 6.89789  | 2.69785     | 0.21348        | 0.00653  | 0.00214 | 29.60555 | 3.45011   | 7.17   | 0.83  | 11.58   |
| 30      | 0.2845                       | 176.3954 | 5.85864            | 0.5572             | 0.18277            | 0.19429        | 0.012     | 32.52794 | 1.6976   | 1.02278     | 0.33562        | 0.00906  | 0.00293 | 119.0444 | 4.96711   | 28.67  | 1.19  | 4.15    |
| 31      | 0.2961                       | 1189.789 | 18.33645           | 1.2246             | 0.09011            | 0.10188        | 0.00597   | 2.522    | 0.14298  | 2.24892     | 0.16563        | 0.00026  | 0.00131 | 1160.757 | 17.98625  | 261.79 | 3.78  | 1.44    |
| 32      | 0.3188                       | 41.59007 | 0.34283            | 0.00522            | 0.04082            | 0.03942        | 0.00341   | 28.02462 | 2.41233  | 0.00957     | 0.07491        | -0.00031 | 0.00067 | 29.91334 | 1.03353   | 7.25   | 0.25  | 3.45    |
| 33      | 0.3237                       | 69.74258 | 1.96923            | 1.20274            | 0.18986            | 0.11042        | 0.01366   | 46.66405 | 5.63944  | 2.20874     | 0.34896        | -0.00094 | 0.00304 | 37.21365 | 4.07636   | 9.01   | 0.98  | 10.88   |
| 34      | 0.3326                       | 53.14189 | 1.02669            | -0.19989           | 0.09911            | 0.09829        | 0.00664   | 54.71625 | 3.54503  | -0.36672    | 0.1818         | -0.00066 | 0.00174 | 24.04779 | 1.94186   | 5.83   | 0.47  | 8.06    |
| 35      | 0.3332                       | 521.1643 | 101.98455          | 1.72077            | 1.56708            | 1.54799        | 0.32397   | 87.74889 | 6.53559  | 3.16121     | 2.88237        | -0.03412 | 0.02818 | 63.92244 | 36.34518  | 15.45  | 8.75  | 56.63   |
| 36      | 0.3361                       | 1498.351 | 69.40441           | 0.59469            | 0.31247            | 0.13364        | 0.02023   | 2.63242  | 0.37991  | 1.09163     | 0.57382        | -0.0053  | 0.0054  | 1459.492 | 67.87719  | 323.44 | 13.77 | 4.26    |
| 37      | 0.3423                       | 1139.236 | 21.70491           | 0.51236            | 0.15701            | 0.14407        | 0.00907   | 3.73334  | 0.22418  | 0.94046     | 0.2883         | 0.00467  | 0.00138 | 1097.073 | 21.06609  | 248.38 | 4.46  | 1.80    |
| 38      | 0.3592                       | 68.54999 | 0.72581            | 0.04634            | 0.06495            | 0.10554        | 0.00362   | 45.50737 | 1.48752  | 0.08502     | 0.11919        | 0.00067  | 0.00068 | 37.33973 | 1.09601   | 9.04   | 0.26  | 2.88    |
| 39      | 0.3624                       | 1079.677 | 40.55964           | 5.38557            | 0.36985            | 0.56149        | 0.02544   | 15.32682 | 0.39188  | 9.9195      | 0.68381        | 0.01065  | 0.00356 | 917.6619 | 34.88423  | 210.03 | 7.54  | 3.59    |
| 40      | 0.3631                       | 4800.733 | 987.29166          | 16.48892           | 3.65657            | 17.41517       | 0.3068    | 90.77269 | 0.91276  | 30.61135    | 6.68334        | 0.02568  | 0.02568 | 448.1948 | 103.41233 | 105.64 | 23.67 | 22.41   |
| 41      | 0.3695                       | 1481.195 | 27.25198           | 0.06669            | 0.15075            | 0.13615        | 0.00904   | 2.71586  | 0.17323  | 0.12238     | 0.27662        | 0.00113  | 0.00136 | 1441.007 | 26.63915  | 319.68 | 5.42  | 1.70    |
| 42      | 0.4009                       | 762.6519 | 5.42074            | 0.10181            | 0.03264            | 0.10705        | 0.00173   | 4.148    | 0.06025  | 0.01983     | 0.0599         | 0.00125  | 0.00041 | 730.9942 | 5.21709   | 24.624 | 1.15  | 0.68    |
| 43      | 0.4039                       | 1120.666 | 50.87953           | 2.01081            | 0.45663            | 0.41247        | 0.03336   | 10.86163 | 0.72868  | 3.6948      | 0.84023        | 0.01007  | 0.00537 | 1000.338 | 46.22455  | 227.8  | 9.89  | 4.34    |
| 44      | 0.451                        | 44.28267 | 0.17533            | 0.06245            | 0.02551            | 0.02558        | 0.00157   | 17.06624 | 1.04845  | 0.11459     | 0.0468         | 0.00061  | 0.00029 | 36.70227 | 0.48921   | 8.89   | 0.12  | 1.35    |
| 45      | 0.4629                       | 40.71722 | 0.5501             | 0.64345            | 0.1127             | 0.04131        | 0.0058    | 29.87187 | 4.20017  | 1.18118     | 0.20698        | 0.00177  | 0.00128 | 28.54638 | 1.75911   | 6.92   | 0.43  | 6.21    |
| 46      | 0.4638                       | 2147.324 | 344.86567          | 135.2806           | 21.78522           | 5.70034        | 0.92258   | 77.92578 | 1.5822   | 274.4406    | 48.86343       | 0.02534  | 0.02092 | 52.00669 | 100.38706 | 122.92 | 22.76 | 18.52   |
| 47      | 0.4735                       | 55.21561 | 1.004              | 0.02402            | 0.12535            | 0.09945        | 0.00787   | 53.24672 | 1.12908  | 0.04407     | 0.23001        | 0.00023  | 0.00141 | 25.81661 | 2.33845   | 6.25   | 0.57  | 9.12    |
| 48      | 0.4787                       | 988.5241 | 25.63771           | 0.29047            | 0.23623            | 0.17558        | 0.0139    | 5.24651  | 0.39268  | 0.53308     | 0.43363        | 0.00055  | 0.00285 | 936.8252 | 24.61676  | 214.16 | 5.31  | 2.48    |
| 49      | 0.4788                       | -349.858 | 525.65851          | 4.71164            | 14.29337           | -0.79958       | 1.48829   | 67.64055 | 74.50579 | 8.67407     | 26.40177       | 0.15368  | 0.31841 | -113.6   | 313.04764 | -27.79 | 77.17 | -277.69 |
| 50      | 0.4792                       | 135.8559 | 255.11376          | 76.41095           | 14.58202           | 1.71235        | 0.36641   | 36.82858 | 3.81265  | 148.2009    | 29.89542       | 0.05047  | 0.03916 | 906.0207 | 188.21692 | 207.51 | 40.72 | 19.62   |
| 51      | 0.4845                       | 1127.25  | 24.65938           | 1.11565            | 0.18561            | 0.11783        | 0.0132    | 3.08071  | 0.33946  | 2.04867     | 0.3411         | 0.00813  | 0.00305 | 1093.355 | 24.24269  | 247.59 | 5.13  | 2.07    |
| 52      | 0.4854                       | 517.629  | 66.81907           | 40.44216           | 5.37284            | 1.41521        | 0.19577   | 80.15099 | 0.40472  | 76.38749    | 10.44663       | 0.02621  | 0.02054 | 105.7591 | 25.37783  | 25.49  | 6.16  | 24.17   |
| 53      | 0.4938                       | 156.7809 | 2.65719            | 0.88802            | 0.09812            | 0.39306        | 0.00967   | 74.05148 | 1.33917  | 1.63043     | 0.18027        | 0.01481  | 0.00187 | 40.70014 | 2.22035   | 9.85   | 0.54  | 5.48    |
| 54      | 0.4948                       | 915.8805 | 77.65937           | 25.0918            | 2.38156            | 1.94114        | 0.17579   | 62.40506 | 2.00028  | 46.87055    | 4.52893        | 0.08073  | 0.01633 | 350.5251 | 35.57258  | 83.14  | 8.25  | 9.92    |
| 55      | 0.5007                       | 1264.675 | 23.30033           | 1.72161            | 0.14902            | 0.10753        | 0.01153   | 2.50133  | 0.26259  | 3.16277     | 0.2741         | 0.00028  | 0.00251 | 1234.513 | 23.04875  | 272.21 | 4.8   | 1.73    |
| 56      | 0.5033                       | 730.9544 | 24.74529           | 12.4852            | 0.50162            | 0.21788        | 0.03624</ |          |          |             |                |          |         |          |           |        |       |         |

|     |        |          |           |          |          |          |         |          |          |          |          |          |         |          |           |        |       |         |
|-----|--------|----------|-----------|----------|----------|----------|---------|----------|----------|----------|----------|----------|---------|----------|-----------|--------|-------|---------|
| 64  | 0.5682 | 40.52848 | 0.70459   | 0.14152  | 0.11737  | 0.07772  | 0.00631 | 56.68026 | 4.51162  | 0.25969  | 0.21541  | 0.00108  | 0.00152 | 17.54572 | 1.85634   | 4.25   | 0.45  | 10.59   |
| 65  | 0.5731 | 608.8497 | 18.9113   | 2.83206  | 0.25926  | 0.11036  | 0.01256 | 5.31826  | 0.58684  | 5.20685  | 0.47761  | 0.00376  | 0.00248 | 577.5967 | 18.33703  | 135.02 | 4.13  | 3.06    |
| 66  | 0.575  | 51.17615 | 4.87679   | 2.54031  | 0.65299  | 0.04306  | 0.02313 | 24.46963 | 13.16325 | 4.6695   | 1.20246  | 0.0184   | 0.00646 | 38.70057 | 7.70567   | 9.37   | 1.86  | 19.85   |
| 67  | 0.5861 | 1159.8   | 16.07247  | 1.00318  | 0.09869  | 0.10133  | 0.00525 | 2.57462  | 0.12883  | 1.84201  | 0.18134  | 0.0055   | 0.00151 | 1130.712 | 15.75261  | 255.48 | 3.32  | 1.30    |
| 68  | 0.5911 | 155.3073 | 5.40787   | 1.15494  | 0.2494   | 0.39128  | 0.0174  | 74.40086 | 2.06807  | 2.12089  | 0.45837  | 0.00653  | 0.00311 | 39.78218 | 3.50528   | 9.63   | 0.85  | 8.83    |
| 69  | 0.5914 | 134.4332 | 89.43365  | -2.55116 | 5.33506  | 0.35522  | 0.3337  | 78.25626 | 51.93387 | -4.67261 | 9.75393  | 0.04447  | 0.07399 | 29.17176 | 72.37403  | 7.07   | 17.5  | 247.52  |
| 70  | 0.6029 | 85.67582 | 1.35189   | 0.82123  | 0.11271  | 0.20356  | 0.00645 | 70.15468 | 1.94109  | 1.50771  | 0.20706  | 0.00137  | 0.00151 | 25.5762  | 1.71577   | 6.2    | 0.42  | 6.77    |
| 71  | 0.6058 | 220.3173 | 10.74965  | 12.69734 | 0.73324  | 0.65366  | 0.03695 | 87.20793 | 2.51317  | 23.50867 | 1.36985  | 0.03995  | 0.00579 | 28.43434 | 5.76314   | 6.89   | 1.39  | 20.17   |
| 72  | 0.606  | 396.6976 | 255.46485 | 2.50613  | 5.86711  | 1.5298   | 1.02297 | 113.911  | 20.6832  | 4.60657  | 10.80355 | -0.0095  | 0.09041 | -55.2783 | 89.51632  | -13.47 | 21.89 | -162.51 |
| 73  | 0.6101 | 166.6382 | 4.97629   | 6.33505  | 0.36592  | 0.47691  | 0.02095 | 84.27228 | 2.74619  | 11.67619 | 0.67746  | 0.00296  | 0.00364 | 26.32151 | 4.67029   | 6.38   | 1.13  | 17.71   |
| 74  | 0.6193 | 1025.844 | 20.06993  | 1.95663  | 0.1051   | 0.10078  | 0.00575 | 2.88732  | 0.15557  | 3.59511  | 0.19337  | 0.00358  | 0.00164 | 997.5742 | 19.61008  | 227.21 | 4.2   | 1.85    |
| 75  | 0.6241 | 871.9738 | 23.48527  | 0.35124  | 0.19114  | 0.64255  | 0.02187 | 21.7725  | 0.45568  | 0.64464  | 0.35089  | 0.00425  | 0.00348 | 682.2692 | 18.8216   | 158.44 | 4.18  | 2.64    |
| 76  | 0.6314 | 1215.401 | 20.92766  | 1.01301  | 0.141    | 0.10454  | 0.0099  | 2.53486  | 0.23664  | 1.86007  | 0.25909  | 0.00249  | 0.00196 | 1185.412 | 20.62888  | 266.96 | 4.32  | 1.62    |
| 77  | 0.6394 | 956.2292 | 19.79473  | 1.98318  | 0.13235  | 0.14298  | 0.00764 | 40.4159  | 2.01754  | 3.64396  | 0.24352  | 0.00103  | 0.00192 | 915.3936 | 19.09116  | 209.54 | 4.13  | 1.97    |
| 78  | 0.6401 | 260.8419 | 48.82675  | 8.87932  | 2.20521  | 0.68774  | 0.14857 | 77.63999 | 8.48074  | 16.39514 | 4.09748  | 0.03054  | 0.02318 | 58.68566 | 24.90755  | 14.19  | 6     | 42.28   |
| 79  | 0.6445 | 442.9146 | 17.55658  | 2.05486  | 0.25532  | 0.60044  | 0.02884 | 40.02402 | 1.09331  | 3.77586  | 0.46984  | 0.00216  | 0.00292 | 266.0106 | 11.64011  | 63.44  | 2.73  | 4.30    |
| 80  | 0.6483 | 1174.406 | 48.23926  | 1.72683  | 0.20419  | 0.22333  | 0.01265 | 5.60736  | 0.21985  | 3.17236  | 0.37558  | 0.00436  | 0.00358 | 1109.878 | 45.72642  | 251.08 | 9.66  | 3.85    |
| 81  | 0.6681 | 842.7935 | 8.48049   | 0.20262  | 0.04162  | 0.10291  | 0.00339 | 3.60647  | 0.11328  | 0.37183  | 0.07638  | 0.00204  | 0.00058 | 812.486  | 8.23317   | 187.16 | 1.8   | 0.96    |
| 82  | 0.6705 | 849.6905 | 60.33934  | 3.99461  | 0.45683  | 0.40831  | 0.03707 | 14.1617  | 0.80364  | 7.35029  | 0.84298  | 0.01538  | 0.00487 | 731.3978 | 52.54074  | 169.33 | 11.61 | 6.86    |
| 83  | 0.6762 | 1064.135 | 26.9763   | 0.58362  | 0.14971  | 0.34453  | 0.01054 | 9.56313  | 0.16393  | 1.0713   | 0.27492  | 0.00323  | 0.00167 | 962.7402 | 24.48049  | 219.74 | 5.26  | 2.39    |
| 84  | 0.682  | 1112.784 | 35.1301   | 8.65523  | 0.26669  | 0.62197  | 0.02315 | 16.46604 | 0.32571  | 12.6396  | 0.49411  | 0.00236  | 0.00278 | 934.0501 | 29.8568   | 213.56 | 6.44  | 3.02    |
| 85  | 0.6826 | 942.9828 | 232.24469 | 29.63906 | 7.44846  | 2.57917  | 0.64192 | 80.56616 | 2.91684  | 55.54627 | 14.25751 | 0.05589  | 0.02488 | 187.1699 | 54.85419  | 44.87  | 12.99 | 28.95   |
| 86  | 0.6872 | 1285.037 | 48.54732  | 2.3843   | 0.21114  | 0.00554  | 0.01176 | 0.11209  | 0.2703   | 4.38224  | 0.38871  | -0.00827 | 0.00192 | 1285.731 | 48.78122  | 287.84 | 10.09 | 3.51    |
| 87  | 0.6944 | 35.34981 | 0.99832   | 0.09122  | 0.12853  | 0.00766  | 0.00755 | 6.38495  | 6.31495  | 0.16738  | 0.23587  | -0.00464 | 0.00177 | 33.06707 | 2.42007   | 8.01   | 0.58  | 7.24    |
| 88  | 0.7039 | 114.5557 | 2.03831   | 1.94923  | 0.11126  | 0.27894  | 0.01113 | 71.83277 | 2.58324  | 3.58149  | 0.2047   | -0.00214 | 0.0012  | 32.30329 | 3.02405   | 7.82   | 0.73  | 9.34    |
| 89  | 0.7172 | 50.7251  | 0.699     | 0.04337  | 0.07007  | 0.08249  | 0.00438 | 48.07394 | 2.47251  | 0.07958  | 0.12858  | -0.00322 | 0.0006  | 26.32493 | 1.30858   | 6.38   | 0.32  | 5.02    |
| 90  | 0.7232 | 1337.107 | 39.42035  | 0.50168  | 0.17341  | 0.2562   | 0.01451 | 5.65903  | 0.27375  | 0.92084  | 0.31841  | -0.00623 | 0.00147 | 1261.859 | 37.39657  | 282.89 | 7.76  | 2.74    |
| 91  | 0.7291 | 69.19536 | 2.55902   | 0.84657  | 0.1647   | 0.07145  | 0.01727 | 30.42398 | 7.296    | 1.55427  | 0.30256  | 0.00889  | 0.00257 | 48.15151 | 5.35843   | 11.65  | 1.29  | 11.07   |
| 92  | 0.7304 | 1105.776 | 187.16518 | 12.79026 | 2.34913  | 0.38399  | 0.09037 | 10.16648 | 1.67802  | 23.68227 | 4.38926  | 0.01798  | 0.01373 | 1002.385 | 172.24105 | 228.24 | 36.84 | 16.14   |
| 93  | 0.741  | 941.0805 | 20.31874  | 0.60038  | 0.09417  | 0.07966  | 0.00838 | 2.49628  | 0.25753  | 1.10244  | 0.17294  | 0.00179  | 0.00148 | 917.9489 | 19.97636  | 210.09 | 4.32  | 2.06    |
| 94  | 0.7482 | 42.56848 | 1.39793   | 0.77698  | 0.16892  | 0.06011  | 0.01282 | 41.60413 | 8.80639  | 1.42644  | 0.31029  | 0.00094  | 0.00229 | 24.85454 | 3.84182   | 6.02   | 0.93  | 15.45   |
| 95  | 0.7685 | 173.9115 | 2.18377   | 0.23263  | 0.06614  | 0.47541  | 0.00844 | 80.78222 | 1.04217  | 0.42691  | 0.1214   | 0.01467  | 0.00084 | 33.42171 | 1.87194   | 8.09   | 0.45  | 5.56    |
| 96  | 0.7689 | 1932.467 | 1208.9322 | 56.92455 | 35.74475 | 4.70527  | 2.95973 | 71.70813 | 4.72926  | 108.8235 | 71.19592 | 0.13956  | 0.09874 | 569.6225 | 383.32496 | 133.22 | 86.42 | 64.87   |
| 97  | 0.7916 | 44.30495 | 0.37791   | 0.09677  | 0.04331  | 0.04386  | 0.00226 | 29.25265 | 1.49172  | 0.17757  | 0.07948  | 0.00229  | 0.00067 | 31.32571 | 0.71558   | 7.59   | 0.17  | 2.24    |
| 98  | 0.792  | 1789.462 | 798.68962 | 0.98493  | 2.08023  | 3.33345  | 1.49325 | 55.04285 | 2.10677  | 1.80847  | 3.82226  | -0.0015  | 0.03606 | 805.0377 | 361.56085 | 185.53 | 79.18 | 42.68   |
| 99  | 0.8041 | 1192.47  | 20.81205  | 1.38045  | 0.08345  | 0.06756  | 0.00522 | 1.66466  | 0.1259   | 2.53541  | 0.15342  | 0.00232  | 0.00116 | 1173.735 | 20.56088  | 264.52 | 4.31  | 1.63    |
| 100 | 0.8062 | 1333.111 | 116.94705 | 5.38833  | 0.84574  | 1.47478  | 0.1313  | 32.65763 | 0.50761  | 9.92461  | 1.5637   | 0.00554  | 0.00837 | 901.158  | 79.6764   | 206.46 | 17.25 | 8.36    |
| 101 | 0.8187 | 47.47579 | 0.62536   | 0.16949  | 0.06975  | 0.08648  | 0.00435 | 53.83274 | 2.61566  | 0.31103  | 0.12801  | 0.00235  | 0.00116 | 21.90718 | 1.27598   | 5.31   | 0.31  | 5.84    |
| 102 | 0.8261 | 76.32226 | 1.95941   | 0.40651  | 0.14807  | 0.17467  | 0.00651 | 67.61067 | 1.88989  | 0.7461   | 0.27184  | 0.00136  | 0.00188 | 24.71775 | 1.59583   | 5.99   | 0.39  | 6.51    |
| 103 | 0.8495 | 980.8602 | 7.65395   | 1.36016  | 0.0599   | 0.10463  | 0.00278 | 3.14091  | 0.08012  | 2.49811  | 0.11012  | 0.00347  | 0.00049 | 950.937  | 7.47013   | 217.2  | 1.61  | 0.74    |
| 104 | 0.8575 | 70.75963 | 1.83978   | 0.09546  | 0.15712  | 0.16459  | 0.01075 | 68.75032 | 4.13652  | 0.17517  | 0.28832  | 0.00296  | 0.00153 | 22.10437 | 2.98705   | 5.36   | 0.72  | 13.43   |
| 105 | 0.8579 | 1232.555 | 536.20094 | 37.21096 | 16.58869 | 2.74503  | 1.21024 | 65.56373 | 4.71598  | 32.10307 | 0.10823  | 0.05578  | 0.00578 | 435.8907 | 203.71497 | 102.82 | 46.71 | 45.43   |
| 106 | 0.8819 | 64.62905 | 0.65064   | 0.5315   | 0.05426  | 0.10663  | 0.00292 | 48.70707 | 1.25215  | 0.97559  | 0.09963  | 0.00255  | 0.00037 | 33.14734 | 0.88104   | 8.03   | 0.21  | 2.62    |
| 107 | 0.8831 | 573.3568 | 82.01327  | 5.91047  | 1.37551  | 0.24127  | 0.05603 | 12.35035 | 2.27517  | 10.89035 | 2.54508  | 0.02277  | 0.00943 | 504.6257 | 73.66681  | 118.51 | 16.74 | 14.13   |
| 108 | 0.8938 | 1115.013 | 18.38318  | 4.48282  | 0.14894  | 0.2005   | 0.00673 | 5.28057  | 0.15538  | 8.25148  | 0.27502  | 0.00454  | 0.00093 | 1059.46  | 17.61014  | 240.4  | 3.74  | 1.56    |
| 109 | 0.8949 | 534.825  | 78.38367  | 7.38638  | 1.36168  | 0.19216  | 0.01631 | 10.5038  | 3.31762  | 13.62407 | 0.25246  | 0.03486  | 0.01203 | 481.1314 | 73.10327  | 113.16 | 16.67 | 14.73   |
| 110 | 0.8962 | 1988.925 | 308.46367 | 2.17858  | 0.9883   | 6.35664  | 0.98834 | 94.43469 | 1.09279  | 4.00356  | 1.81899  | 0.00869  | 0.01134 | 110.8587 | 27.80613  | 26.71  | 6.65  | 24.90   |
| 111 | 0.9073 | 36.50702 | 0.80693   | 0.09004  | 0.11007  | 0.03121  | 0.00626 | 25.25948 | 5.0424   | 0.16521  | 0.20199  | 0.00077  | 0.00128 | 27.26507 | 1.93875   | 6.61   | 0.47  | 7.11    |
| 112 | 0.9227 | 22.32494 | 0.29758   | -0.04249 | 0.07104  | 0.00071  | 0.00453 | 0.95111  | 0.60443  | -0.07796 | 0.13034  | 0.00086  | 0.00086 | 22.08252 | 1.37084   | 5.35   | 0.33  | 6.17    |
| 113 | 0.9257 | 7.19341  | 0.81535   | 1.52349  | 0.45811  | -0.12437 | 0.02606 | -514.768 | 109.0954 | 2.7984   | 0.84238  | 0.00353  | 0.00508 | 44.08782 | 7.95571   | 10.67  | 1.92  | 17.99   |
| 114 | 0.9459 | 68.49663 | 0.66892   | 0.30012  | 0.05463  | 0.15045  | 0.00453 | 84.89758 | 1.86375  | 0.5508   | 0.10029  | 0.00017  | 0.00065 | 24.03865 | 1.30243   | 5.83   | 0.32  | 5.49    |
| 115 | 0.958  | 1089.818 | 13.98931  | 1.72088  | 0.11404  | 0.11313  | 0.00535 | 3.05448  | 0.13963  | 3.16142  | 0.20976  | 0.00364  | 0.0014  | 1057.786 | 13.6809   | 240.05 | 2.91  | 1.21    |
| 116 | 0.9605 | 439.7499 | 39.13232  | 1.94938  | 0.52735  | 1.35698  | 0.12562 | 91.1552  | 3.23837  | 3.58178  | 0.97029  | 0.00853  | 0.00698 | 38.94601 | 10.8258   | 9.43   | 2.61  | 27.68   |
| 117 | 0.9674 | 1150.506 | 34.07872  | 3.3904   | 0.13581  | 0.0097   | 0.46391 | 0.22672  | 6.23584  | 0.40691  | 0.00715  | 0.00283  | 0.00113 | 291.391  | 33.16031  | 251.8  | 7     | 2.78    |
| 118 | 0.9691 | 80.82541 | 9.12959   | 1.13949  | 0.76545  | 0.16566  | 0.0345  | 60.46999 | 10.64895 | 2.09249  | 1.40676  | 0.02286  | 0.00968 | 31.96429 | 9.363     | 7.74   | 2.26  | 29.20   |
| 119 | 0.9821 | 181.8759 | 3.14841   | 0.81419  | 0.09015  | 0.52708  | 0.01087 |          |          |          |          |          |         |          |           |        |       |         |

|    |        |          |           |          |          |          |          |          |          |          |          |          |         |          |           |        |       |        |
|----|--------|----------|-----------|----------|----------|----------|----------|----------|----------|----------|----------|----------|---------|----------|-----------|--------|-------|--------|
| 26 | 0.195  | 1009.73  | 19.86708  | 19.5106  | 0.43287  | 0.75464  | 0.02048  | 21.92616 | 0.41966  | 36.29942 | 0.81661  | 0.00424  | 0.00175 | 799.3256 | 16.57871  | 122.17 | 2.45  | 2.01   |
| 27 | 0.2083 | 367.1725 | 2.15949   | 0.41017  | 0.00999  | 0.15973  | 0.00184  | 12.84676 | 0.12783  | 0.75282  | 0.01834  | 0.00234  | 0.00038 | 320.0696 | 1.94169   | 49.92  | 0.3   | 0.60   |
| 28 | 0.2142 | 81.31618 | 0.46169   | 0.73882  | 0.02046  | 0.22214  | 0.00331  | 80.67966 | 1.12512  | 1.35634  | 0.03758  | 0.00027  | 0.00066 | 15.71302 | 0.92146   | 2.48   | 0.15  | 6.05   |
| 29 | 0.2152 | 846.6141 | 21.06191  | 2.16881  | 0.11972  | 2.3468   | 0.06515  | 81.89383 | 1.0294   | 3.98556  | 0.22035  | 0.01418  | 0.00401 | 153.5191 | 9.5641    | 24.12  | 1.49  | 6.18   |
| 30 | 0.2161 | 1220.419 | 39.99775  | 17.40543 | 0.63363  | 1.17541  | 0.04804  | 28.3434  | 0.6983   | 32.33402 | 1.19175  | 0.05242  | 0.0047  | 885.373  | 30.65007  | 134.84 | 4.5   | 3.34   |
| 31 | 0.2161 | 4838.099 | 4813.2076 | -6.68605 | 7.25529  | 16.26273 | 16.19312 | 99.34104 | 4.14636  | -12.2103 | 13.18763 | 0.08858  | 0.13815 | 31.73094 | 202.13115 | 5.01   | 31.88 | 636.33 |
| 32 | 0.2192 | 1112.94  | 10.89572  | 3.56076  | 0.05352  | 0.88823  | 0.01157  | 23.55793 | 0.20279  | 6.54997  | 0.0987   | 0.02074  | 0.00169 | 852.8766 | 8.67441   | 130.06 | 1.28  | 0.98   |
| 33 | 0.2248 | 558.9773 | 5.05407   | 0.09305  | 0.01355  | 0.25153  | 0.0044   | 13.29628 | 0.19926  | 0.17075  | 0.02486  | 0.00264  | 0.00079 | 484.6603 | 4.52294   | 75.06  | 0.69  | 0.92   |
| 34 | 0.2405 | 1201.73  | 8.05512   | 1.0248   | 0.01288  | 0.22552  | 0.00307  | 5.53863  | 0.06579  | 1.88173  | 0.02366  | 0.00235  | 0.00029 | 1135.965 | 7.662     | 171.24 | 1.1   | 0.64   |
| 35 | 0.2424 | 2496.656 | 50.26944  | 16.89411 | 0.35123  | 4.66865  | 0.09632  | 55.20225 | 0.24974  | 31.37267 | 0.66011  | 0.00834  | 0.00235 | 1131.938 | 23.92199  | 170.66 | 3.44  | 2.02   |
| 36 | 0.2428 | 2971.686 | 274.74165 | 35.66568 | 3.34034  | 8.00256  | 0.74242  | 79.47807 | 0.658    | 67.13252 | 6.44989  | 0.01463  | 0.00692 | 625.5986 | 62.74406  | 96.31  | 9.41  | 9.77   |
| 37 | 0.243  | 6477.404 | 1078.3424 | 68.71182 | 11.45008 | 18.55845 | 3.09154  | 84.57683 | 0.61012  | 132.5067 | 23.20691 | 0.2092   | 0.04077 | 1049.967 | 188.61598 | 158.83 | 27.31 | 17.19  |
| 38 | 0.2497 | 3082.724 | 20.53803  | 0.27154  | 0.01523  | 10.30252 | 0.104    | 98.75685 | 0.19688  | 0.49833  | 0.02796  | 0.00396  | 0.00184 | 38.32973 | 6.08423   | 6.05   | 0.96  | 15.87  |
| 39 | 0.2572 | 712.7416 | 3.20388   | 4.63157  | 0.04324  | 1.00607  | 0.01044  | 94.94781 | 0.69482  | 8.52618  | 0.07987  | 0.00355  | 0.0009  | 15.85065 | 2.18341   | 2.5    | 0.34  | 13.60  |
| 40 | 0.2583 | 1311.427 | 61.80317  | 4.55801  | 0.23478  | 0.79359  | 0.04566  | 17.85353 | 0.59235  | 8.39033  | 0.43358  | 0.01341  | 0.00419 | 1080.745 | 51.70782  | 163.28 | 7.47  | 4.57   |
| 41 | 0.2663 | 72.75465 | 0.54819   | 0.04533  | 0.01127  | 0.20708  | 0.00385  | 84.13852 | 1.44468  | 0.08317  | 0.02067  | 0.00212  | 0.00062 | 11.53562 | 1.05605   | 1.82   | 0.17  | 9.34   |
| 42 | 0.2704 | 2848.671 | 53.94039  | 3.66899  | 0.07295  | 6.16436  | 0.12088  | 63.9345  | 0.32721  | 6.74959  | 0.13456  | 0.02426  | 0.00283 | 1030.046 | 21.68301  | 155.94 | 3.14  | 2.01   |
| 43 | 0.2706 | 12595.01 | 2340.1022 | 74.52519 | 13.87647 | 41.93525 | 7.79736  | 98.33853 | 0.71857  | 144.3402 | 28.36899 | 0.05827  | 0.03777 | 220.8872 | 104.90335 | 34.6   | 16.27 | 47.02  |
| 44 | 0.2745 | 146.4415 | 2.26921   | 2.13284  | 0.04181  | 0.3523   | 0.00879  | 70.98388 | 1.4001   | 3.91936  | 0.07695  | 0.00651  | 0.00088 | 42.54713 | 2.16269   | 6.72   | 0.34  | 5.06   |
| 45 | 0.275  | 4762.078 | 264.54808 | 67.49549 | 3.81835  | 7.07822  | 0.40026  | 43.80572 | 0.46476  | 130.0436 | 7.72504  | 0.54563  | 0.0327  | 2809.939 | 165.57009 | 397.19 | 21    | 5.29   |
| 46 | 0.2862 | 471.0134 | 2.46213   | 1.18997  | 0.02829  | 1.38741  | 0.00993  | 87.02653 | 0.4275   | 2.18527  | 0.052    | 0.00305  | 0.00056 | 61.15433 | 2.04205   | 9.65   | 0.32  | 3.32   |
| 47 | 0.2889 | 1172.415 | 23.37895  | 1.33849  | 0.04622  | 0.86188  | 0.02257  | 21.71435 | 0.35542  | 2.45828  | 0.08497  | 0.00228  | 0.0016  | 918.6778 | 19.26688  | 139.72 | 2.82  | 2.02   |
| 48 | 0.2926 | 48.52571 | 0.78404   | 0.16514  | 0.02438  | 0.05898  | 0.00672  | 35.9121  | 4.06254  | 0.30304  | 0.04474  | 0.00195  | 0.00111 | 31.0837  | 2.04196   | 4.91   | 0.32  | 6.52   |
| 49 | 0.2937 | 9907.2   | 165.64299 | 66.43278 | 1.14202  | 29.07438 | 0.49156  | 86.66451 | 0.22136  | 127.8953 | 2.30682  | 0.05251  | 0.00708 | 1386.205 | 33.51886  | 206.87 | 4.73  | 2.29   |
| 50 | 0.3095 | 129.3123 | 0.52764   | 0.2579   | 0.00877  | 0.20802  | 0.00248  | 47.50951 | 0.54245  | 1.05346  | 0.0161   | 0.00325  | 0.00026 | 67.8886  | 0.76685   | 10.7   | 0.12  | 1.12   |
| 51 | 0.3185 | 1081.059 | 7.83286   | 0.15156  | 0.01847  | 0.12206  | 0.00358  | 3.33525  | 0.09487  | 0.27813  | 0.03389  | 0.00284  | 0.00053 | 1045.086 | 7.64292   | 158.12 | 1.11  | 0.70   |
| 52 | 0.3212 | 680.2312 | 7.85802   | 3.99445  | 0.09006  | 2.12599  | 0.03353  | 92.31084 | 1.00588  | 7.35001  | 0.16619  | 0.0118   | 0.00186 | 52.44977 | 6.89634   | 8.28   | 1.09  | 13.16  |
| 53 | 0.3647 | 113.5484 | 0.23579   | 0.21214  | 0.00347  | 0.1042   | 0.00062  | 27.10809 | 0.15214  | 0.3893   | 0.00637  | 0.00126  | 0.00017 | 82.75832 | 2.24484   | 13.04  | 0.04  | 0.31   |
| 54 | 0.3648 | 2313.479 | 1060.9922 | -1.45017 | 1.70603  | 6.42659  | 3.22679  | 89.10258 | 5.90204  | -2.65814 | 3.12394  | 0.02766  | 0.06455 | 232.0353 | 170.69462 | 36.33  | 26.45 | 72.80  |
| 55 | 0.3787 | 532.3582 | 1.10614   | 0.21673  | 0.00707  | 0.58557  | 0.00431  | 32.502   | 0.22982  | 0.39773  | 0.01298  | 0.00191  | 0.00047 | 359.3661 | 1.43822   | 55.95  | 0.22  | 0.39   |
| 56 | 0.3828 | 1559.701 | 13.85722  | 0.06356  | 0.02591  | 1.72428  | 0.01866  | 32.66836 | 0.20249  | 0.11663  | 0.04755  | 0.00303  | 0.00124 | 1050.199 | 9.85718   | 158.87 | 1.43  | 0.90   |
| 57 | 0.3898 | 1565.676 | 14.84512  | 2.63607  | 0.03266  | 5.06236  | 0.04915  | 95.5311  | 0.20443  | 4.84585  | 0.06014  | 0.00493  | 0.00115 | 70.06618 | 3.2784    | 11.05  | 0.52  | 4.71   |
| 58 | 0.4052 | 911.7924 | 2.39715   | 1.29687  | 0.01215  | 0.17196  | 0.00294  | 5.56154  | 0.09433  | 2.38176  | 0.02234  | 0.00152  | 0.00037 | 861.844  | 2.42777   | 131.38 | 0.36  | 0.27   |
| 59 | 0.4067 | 2273.769 | 59.14417  | 8.62325  | 0.23783  | 3.83885  | 0.10352  | 49.85919 | 0.35589  | 15.91942 | 0.44175  | 0.01063  | 0.00362 | 1147.057 | 31.10969  | 172.84 | 4.47  | 2.59   |
| 60 | 0.415  | 266.8423 | 1.73402   | 0.52661  | 0.01613  | 0.49426  | 0.00564  | 54.72377 | 0.52328  | 0.96661  | 0.02962  | 0.00753  | 0.00061 | 120.8476 | 1.6221    | 19.01  | 0.25  | 1.32   |
| 61 | 0.4173 | 3280.391 | 74.09488  | 81.18275 | 0.9536   | 5.8254   | 0.13222  | 52.37262 | 0.1196   | 77.82823 | 1.85612  | 0.01499  | 0.00329 | 1609.151 | 37.66234  | 238.03 | 5.22  | 2.19   |
| 62 | 0.4321 | 3891.887 | 32.91603  | 1.45825  | 0.01953  | 12.81879 | 0.11199  | 97.3271  | 0.21778  | 2.67845  | 0.0359   | 0.01305  | 0.00169 | 104.1327 | 8.53501   | 16.39  | 1.34  | 8.18   |
| 63 | 0.4371 | 1080.441 | 16.54679  | 1.49924  | 0.04167  | 1.33135  | 0.02321  | 36.40182 | 0.30373  | 2.75381  | 0.07662  | 0.00234  | 0.00114 | 687.85   | 11.04869  | 105.62 | 1.65  | 1.56   |
| 64 | 0.4423 | 1140.364 | 10.01918  | 5.61084  | 0.06397  | 1.09732  | 0.01154  | 28.39486 | 0.16514  | 10.33608 | 0.11832  | 0.01311  | 0.00137 | 819.7863 | 7.47878   | 125.19 | 1.1   | 0.88   |
| 65 | 0.4587 | 1026.405 | 4.6011    | 0.26797  | 0.01051  | 0.12015  | 0.00221  | 3.4571   | 0.06179  | 0.49178  | 0.0193   | 0.00216  | 0.00024 | 991.0803 | 4.48961   | 150.28 | 0.65  | 0.43   |
| 66 | 0.4593 | 2979.81  | 242.93775 | 95.73949 | 7.81369  | 6.59474  | 0.54388  | 65.13411 | 0.18772  | 188.4075 | 16.49176 | 0.02092  | 0.00701 | 1114.266 | 100.92188 | 168.12 | 14.54 | 8.65   |
| 67 | 0.4594 | 672.6152 | 353.11889 | 5.26156  | 3.36746  | 1.22056  | 0.72329  | 53.5607  | 14.82401 | 9.69024  | 6.22501  | 0.07971  | 0.06177 | 331.509  | 193.4209  | 48.91  | 29.77 | 60.87  |
| 68 | 0.4809 | 28.09572 | 0.09702   | 0.01147  | 0.0067   | 0.06609  | 0.00159  | 69.57941 | 1.66691  | 0.02104  | 0.01229  | 0.00082  | 0.00016 | 8.53792  | 0.46972   | 1.35   | 0.07  | 5.19   |
| 69 | 0.4903 | 40.11776 | 0.34836   | 0.88721  | 0.01803  | 0.08714  | 0.00383  | 64.05301 | 2.77705  | 1.62893  | 0.03312  | 0.00667  | 0.00046 | 14.4195  | 1.12319   | 2.28   | 0.18  | 7.89   |
| 70 | 0.5057 | 66.67068 | 0.32091   | 0.11516  | 0.01065  | 0.18321  | 0.00226  | 81.22509 | 0.93724  | 0.21132  | 0.01955  | 0.00023  | 0.00035 | 12.5128  | 0.62995   | 1.98   | 0.1   | 5.05   |
| 71 | 0.5102 | 1304.14  | 19.10684  | 3.25591  | 0.03169  | 4.33976  | 0.06577  | 98.33376 | 0.38475  | 0.43293  | 0.05817  | 0.00994  | 0.00132 | 21.73327 | 5.02923   | 3.43   | 0.79  | 23.03  |
| 72 | 0.5173 | 53.98385 | 0.66471   | 0.19491  | 0.02095  | 0.14018  | 0.00561  | 76.74427 | 2.93737  | 0.35769  | 0.03845  | 0.00157  | 0.00064 | 12.54916 | 1.59497   | 1.98   | 0.25  | 12.63  |
| 73 | 0.5271 | 143.11   | 1.05624   | 0.18079  | 0.01036  | 0.38579  | 0.00487  | 79.66581 | 0.83425  | 0.33178  | 0.01901  | 0.00179  | 0.0003  | 29.09793 | 1.21911   | 4.6    | 0.19  | 4.13   |
| 74 | 0.5439 | 20.81619 | 0.0953    | 0.37455  | 0.00696  | 0.0219   | 0.0018   | 30.98212 | 2.69451  | 0.68743  | 0.01278  | 0.00077  | 0.00018 | 14.3502  | 0.56458   | 2.27   | 0.09  | 3.96   |
| 75 | 0.5576 | 58.20427 | 0.23012   | 0.54489  | 0.01135  | 0.06785  | 0.00254  | 34.3868  | 1.28625  | 1.00018  | 0.02084  | 0.00071  | 0.00021 | 38.1849  | 0.76586   | 6.03   | 0.12  | 1.99   |
| 76 | 0.5851 | 67.04687 | 0.27094   | 0.03936  | 0.00309  | 0.14323  | 0.0171   | 63.15067 | 0.72051  | 0.07223  | 0.00567  | 0.00243  | 0.0002  | 24.69607 | 0.49701   | 3.9    | 0.08  | 2.05   |
| 77 | 0.5918 | 61.95933 | 0.41361   | 0.34142  | 0.02116  | 0.1496   | 0.00505  | 71.33737 | 2.36514  | 0.62661  | 0.03884  | 0.00518  | 0.00042 | 17.75494 | 1.47051   | 2.81   | 0.23  | 8.19   |
| 78 | 0.6024 | 61.36257 | 0.52475   | 0.90359  | 0.01861  | 0.13249  | 0.00321  | 63.71198 | 1.45044  | 1.65903  | 0.03419  | 0.00313  | 0.00042 | 22.2707  | 0.91184   | 3.52   | 0.14  | 3.98   |
| 79 | 0.6025 | 581.2125 | 189.42856 | -0.83802 | 1.86695  | 1.81067  | 0.72066  | 92.07466 | 21.073   | -1.53674 | 3.42155  | -0.04944 | 0.05927 | 46.03344 | 123.33744 | 7.27   | 19.43 | 267.26 |
| 80 | 0.6095 | 65.39272 | 0.54584   | 0.11064  | 0.01923  | 0.15667  | 0.00469  | 70.8136  | 2.03659  | 0.20302  | 0.03529  | 0.00082  | 0.0006  | 19.0786  | 1.34152   | 3.01   | 0.21  | 6.98   |
| 81 | 0.6161 | 63.01022 | 0.38291   | 0.79295  | 0.02376  | 0.14579  | 0.00532  | 68.29956 | 2.46261  | 1.45577  |          |          |         |          |           |        |       |        |

|     |        |          |         |         |         |         |         |          |         |         |         |         |         |          |         |      |      |      |
|-----|--------|----------|---------|---------|---------|---------|---------|----------|---------|---------|---------|---------|---------|----------|---------|------|------|------|
| 117 | 0.9657 | 122.5757 | 0.5085  | 1.14777 | 0.02064 | 0.2445  | 0.00451 | 58.88015 | 1.06673 | 2.10771 | 0.03793 | 0.00213 | 0.0004  | 50.43163 | 1.33053 | 7.96 | 0.21 | 2.64 |
| 118 | 0.9808 | 15.45512 | 0.11435 | 0.00952 | 0.00833 | 0.0167  | 0.00265 | 31.98497 | 5.06409 | 0.01747 | 0.01528 | 0.00041 | 0.00023 | 10.49168 | 0.78521 | 1.66 | 0.12 | 7.23 |
| 119 | 1      | 114.6741 | 0.56392 | 0.33019 | 0.00912 | 0.32698 | 0.0035  | 84.25773 | 0.81433 | 0.606   | 0.01674 | 0.00233 | 0.00029 | 18.05185 | 0.94105 | 2.85 | 0.15 | 5.26 |

|            |          |        |         |         |        |         |          |         |        |         |         |         |          |        |       |      |      |
|------------|----------|--------|---------|---------|--------|---------|----------|---------|--------|---------|---------|---------|----------|--------|-------|------|------|
| Integrated | 458.9013 | 0.2956 | 1.38322 | 0.00209 | 0.8419 | 0.00085 | 54.19085 | 0.04275 | 2.5405 | 0.00383 | 0.00415 | 0.00006 | 210.4108 | 0.2397 | 32.97 | 0.08 | 0.24 |
|------------|----------|--------|---------|---------|--------|---------|----------|---------|--------|---------|---------|---------|----------|--------|-------|------|------|

### KUSKULANA RIVER

Weighted average of J from standards = 9.588e-05 +/- 4.822e-07

| Grain # | Cumulative 39Ar | 40Ar/39Ar +/- meas. | 37Ar/39Ar +/- meas. | 36Ar/39Ar +/- meas. | % Atm. 40Ar | +/-      | Ca/K    | +/-      | Cl/K    | +/-      | 40*/39K  | +/-     | Age (Ma) | +/- (Ma) | %error    |        |       |       |
|---------|-----------------|---------------------|---------------------|---------------------|-------------|----------|---------|----------|---------|----------|----------|---------|----------|----------|-----------|--------|-------|-------|
| 1       | 0.0025          | 29.88472            | 0.64164             | 0.31813             | 0.04222     | 0.03336  | 0.009   | 32.93066 | 8.88146 | 0.58385  | 0.0775   | 0.00672 | 0.00138  | 20.02807 | 2.68767   | 3.46   | 0.46  | 13.29 |
| 2       | 0.0033          | 15360.32            | 485.07727           | 3.30596             | 0.21101     | 48.62716 | 1.61708 | 93.54678 | 0.97535 | 6.08017  | 0.38898  | 0.06429 | 0.02455  | 993.5523 | 153.43072 | 163.97 | 24.2  | 14.76 |
| 3       | 0.0096          | 269.678             | 2.32843             | 0.73503             | 0.02321     | 0.82883  | 0.01254 | 90.8067  | 1.1353  | 1.34939  | 0.04262  | 0.00422 | 0.00096  | 24.80246 | 3.07235   | 4.28   | 0.53  | 12.38 |
| 4       | 0.0153          | 51.30914            | 0.42051             | 2.07845             | 0.03233     | 0.10646  | 0.00465 | 61.01605 | 2.6382  | 3.81928  | 0.05949  | 0.00955 | 0.00075  | 20.02015 | 1.36612   | 3.46   | 0.24  | 6.94  |
| 5       | 0.0199          | 162.1027            | 1.05781             | 0.42021             | 0.03075     | 0.50264  | 0.00772 | 91.62209 | 1.28929 | 0.77126  | 0.05645  | 0.00249 | 0.00097  | 13.58237 | 2.09438   | 2.35   | 0.36  | 15.32 |
| 6       | 0.0361          | 109.5546            | 0.2224              | 0.49701             | 0.01371     | 0.30107  | 0.00306 | 81.1915  | 0.8136  | 0.91227  | 0.02517  | 0.00326 | 0.00038  | 20.60723 | 0.89376   | 3.56   | 0.15  | 4.21  |
| 7       | 0.0461          | 151.5576            | 1.06868             | 0.53437             | 0.01882     | 0.46457  | 0.00562 | 90.56773 | 0.91153 | 0.99758  | 0.03456  | 0.00214 | 0.00056  | 14.29802 | 1.38885   | 2.47   | 0.24  | 9.72  |
| 8       | 0.0463          | 1948.224            | 204.16401           | 91.6906             | 9.67264     | 2.65815  | 0.295   | 39.93056 | 1.47807 | 179.888  | 20.29066 | 0.50536 | 0.05728  | 1251.296 | 143.58791 | 204.18 | 22.15 | 10.85 |
| 9       | 0.0471          | 1251.431            | 26.70825            | 16.94158            | 0.39464     | 0.41694  | 0.02021 | 9.73384  | 0.42859 | 31.4619  | 0.74175  | 0.04856 | 0.00584  | 1143.271 | 25.28998  | 187.43 | 3.94  | 2.10  |
| 10      | 0.0475          | 865.543             | 34.09977            | 29.97122            | 1.22986     | 0.99723  | 0.05365 | 33.76139 | 1.24988 | 56.18223 | 2.35527  | 0.12294 | 0.01231  | 585.7014 | 26.05388  | 98.46  | 4.26  | 4.33  |
| 11      | 0.0477          | 325.3006            | 26.29084            | 0.62771             | 0.3285      | 0.85611  | 0.10863 | 77.75982 | 7.61644 | 1.15227  | 0.60328  | 0.04085 | 0.01827  | 72.37292 | 25.47457  | 12.46  | 4.37  | 35.07 |
| 12      | 0.055           | 86.02606            | 0.69127             | 0.65784             | 0.01717     | 0.21198  | 0.00433 | 72.77794 | 1.37189 | 1.2076   | 0.03153  | 0.0023  | 0.00071  | 23.42086 | 1.19684   | 4.04   | 0.21  | 5.20  |
| 13      | 0.0692          | 187.5786            | 0.86421             | 0.33616             | 0.00971     | 0.56794  | 0.00376 | 89.46965 | 0.43971 | 0.61695  | 0.01782  | 0.00306 | 0.00051  | 19.75424 | 0.83275   | 3.41   | 0.14  | 4.11  |
| 14      | 0.0821          | 73.01259            | 0.42499             | 0.22464             | 0.01419     | 0.20013  | 0.00308 | 81.00559 | 1.16054 | 0.41225  | 0.02604  | 0.00177 | 0.00046  | 13.86487 | 0.852     | 2.39   | 0.15  | 6.28  |
| 15      | 0.0824          | 1142.875            | 90.4408             | 16.94317            | 1.51438     | 0.96956  | 0.10138 | 24.94732 | 1.71507 | 31.46487 | 2.84638  | 0.06647 | 0.01605  | 868.1242 | 72.32477  | 144.07 | 11.54 | 8.01  |
| 16      | 0.0945          | 50.48728            | 0.23236             | 0.92644             | 0.01323     | 0.11468  | 0.00168 | 67.01275 | 0.94662 | 1.70101  | 0.02431  | 0.00484 | 0.00051  | 16.65547 | 0.48735   | 2.88   | 0.08  | 2.78  |
| 17      | 0.0967          | 347.9898            | 6.86489             | 7.14643             | 0.17755     | 0.16305  | 0.00877 | 13.67762 | 0.69379 | 13.17924 | 0.32909  | 0.03741 | 0.00234  | 301.8912 | 6.46684   | 51.42  | 1.09  | 2.12  |
| 18      | 0.1022          | 463.1449            | 3.68659             | 7.91253             | 0.07931     | 0.55107  | 0.00813 | 35.02123 | 0.43873 | 14.6     | 0.14717  | 0.0174  | 0.00114  | 302.6177 | 3.17805   | 51.54  | 0.53  | 1.03  |
| 19      | 0.1091          | 30.21766            | 0.26668             | 1.52196             | 0.02695     | 0.03949  | 0.00283 | 38.23926 | 2.75063 | 2.7956   | 0.04956  | 0.00755 | 0.00042  | 18.66439 | 0.84946   | 3.22   | 0.15  | 4.66  |
| 20      | 0.1118          | 376.5386            | 4.12691             | 8.75702             | 0.12871     | 0.23282  | 0.01313 | 18.08064 | 1.01153 | 16.16791 | 0.23911  | 0.05152 | 0.00217  | 310.3532 | 5.14545   | 52.84  | 0.86  | 1.63  |
| 21      | 0.1121          | 6086.023            | 443.81664           | 130.1391            | 9.54297     | 13.77647 | 1.02498 | 66.71415 | 0.99254 | 262.9545 | 21.23369 | 0.62879 | 0.0534   | 2230.8   | 191.17063 | 349.28 | 27.21 | 7.79  |
| 22      | 0.1137          | 578.649             | 8.32543             | 11.76484            | 0.26393     | 1.75329  | 0.03041 | 89.37242 | 0.88227 | 21.76772 | 0.49243  | 0.05217 | 0.00235  | 62.00846 | 5.23619   | 10.68  | 0.9   | 8.43  |
| 23      | 0.1506          | 52.44823            | 0.17206             | 0.16895             | 0.00406     | 0.12888  | 0.00141 | 72.62442 | 0.76625 | 0.31004  | 0.00744  | 0.00136 | 0.00018  | 14.35159 | 0.40549   | 2.48   | 0.07  | 2.82  |
| 24      | 0.1511          | 1597.091            | 82.15827            | 46.51843            | 2.42609     | 2.01829  | 0.1248  | 37.1038  | 1.28373 | 88.25426 | 4.75909  | 0.21185 | 0.01465  | 1038.612 | 59.19587  | 171.06 | 9.3   | 5.44  |
| 25      | 0.152           | 1679.535            | 39.49447            | 29.66548            | 0.736       | 1.34733  | 0.03819 | 23.56003 | 0.37664 | 55.59683 | 1.40887  | 0.11369 | 0.00698  | 1311.286 | 32.16891  | 213.41 | 4.94  | 2.31  |
| 26      | 0.1524          | 1790.982            | 110.18926           | 48.49061            | 3.03585     | 2.22595  | 0.15482 | 36.50401 | 1.19317 | 92.12852 | 5.9724   | 0.14895 | 0.05152  | 117.7507 | 78.22908  | 192.76 | 12.14 | 6.30  |
| 27      | 0.1529          | 807.6725            | 35.71897            | 20.54987            | 1.05514     | 2.26834  | 0.10674 | 82.7842  | 1.35661 | 38.26146 | 1.99348  | 0.84561 | 0.04017  | 141.0898 | 12.82861  | 24.21  | 2.19  | 9.05  |
| 28      | 0.1542          | 1185.244            | 31.88008            | 25.83696            | 0.74216     | 1.49989  | 0.04572 | 37.21595 | 0.54154 | 48.28836 | 1.41285  | 0.12277 | 0.00642  | 757.9561 | 21.80277  | 126.42 | 3.51  | 2.78  |
| 29      | 0.1682          | 93.98643            | 0.53838             | 0.26466             | 0.01098     | 0.24214  | 0.00421 | 76.13045 | 1.25386 | 0.48571  | 0.02015  | 0.00205 | 0.00039  | 22.43124 | 1.18675   | 3.87   | 0.2   | 5.17  |
| 30      | 0.1763          | 162.5772            | 1.25546             | 1.16344             | 0.02532     | 0.48302  | 0.00772 | 87.75027 | 1.23986 | 2.13651  | 0.04654  | 0.00045 | 0.00059  | 19.928   | 2.0253    | 3.44   | 0.35  | 10.17 |
| 31      | 0.1905          | 46.41978            | 0.22656             | 1.06397             | 0.01083     | 0.10226  | 0.00201 | 64.94969 | 1.24528 | 1.95371  | 0.0199   | 0.00327 | 0.00055  | 16.2721  | 0.58513   | 2.81   | 0.1   | 3.56  |
| 32      | 0.2109          | 131.5798            | 0.57964             | 0.44764             | 0.00836     | 0.37459  | 0.0051  | 84.1162  | 1.08977 | 0.82161  | 0.01536  | 0.00344 | 0.00039  | 20.90176 | 1.43872   | 3.61   | 0.25  | 6.93  |
| 33      | 0.2185          | 86.34111            | 0.50745             | 0.3975              | 0.01588     | 0.23414  | 0.00384 | 80.12354 | 1.23924 | 0.72956  | 0.02916  | 0.00172 | 0.00066  | 17.16047 | 1.07701   | 2.96   | 0.19  | 6.42  |
| 34      | 0.2261          | 740.7913            | 6.82063             | 1.61761             | 0.02525     | 2.40822  | 0.02975 | 96.04914 | 0.79173 | 2.97148  | 0.04643  | 0.01171 | 0.00125  | 29.29996 | 5.87797   | 5.06   | 1.01  | 19.96 |
| 35      | 0.232           | 542.7685            | 4.84284             | 4.43035             | 0.05781     | 0.30157  | 0.00482 | 35.35188 | 0.21784 | 8.1546   | 0.10674  | 0.01488 | 0.00097  | 45.4158  | 4.24618   | 77.02  | 0.7   | 0.91  |
| 36      | 0.2583          | 178.5657            | 0.73119             | 0.30116             | 0.00495     | 0.53378  | 0.00468 | 88.333   | 0.68591 | 0.5527   | 0.00909  | 0.00172 | 0.00039  | 20.83423 | 1.22801   | 3.6    | 0.21  | 5.83  |
| 37      | 0.2708          | 130.9585            | 0.40529             | 0.79577             | 0.0106      | 0.37067  | 0.00332 | 83.60784 | 0.71486 | 1.46095  | 0.01947  | 0.00131 | 0.00047  | 21.47412 | 0.94181   | 3.71   | 0.16  | 4.31  |
| 38      | 0.2736          | 387.7088            | 8.68442             | 12.28423            | 0.29461     | 0.74492  | 0.02056 | 56.51846 | 0.92074 | 22.73712 | 0.55007  | 0.03624 | 0.00268  | 170.0442 | 5.27639   | 29.14  | 0.9   | 3.09  |
| 39      | 0.2749          | 1724.599            | 36.63424            | 25.20786            | 0.55955     | 1.86302  | 0.05396 | 31.80182 | 0.63126 | 47.09128 | 1.06425  | 0.08848 | 0.00654  | 1197.442 | 28.20863  | 195.85 | 4.37  | 2.23  |
| 40      | 0.2928          | 97.69621            | 0.73036             | 0.31081             | 0.00927     | 0.26365  | 0.00353 | 79.74477 | 1.02823 | 0.57042  | 0.01701  | 0.00097 | 0.00039  | 19.78692 | 1.00797   | 3.42   | 0.17  | 4.97  |
| 41      | 0.3011          | 293.3633            | 1.85573             | 0.86891             | 0.01727     | 0.9217   | 0.01008 | 92.82619 | 0.84272 | 1.59532  | 0.03173  | 0.00175 | 0.00094  | 21.05611 | 2.48039   | 3.63   | 0.43  | 11.85 |
| 42      | 0.3171          | 73.09484            | 0.23658             | 0.53052             | 0.01059     | 0.17887  | 0.00365 | 72.28044 | 1.4633  | 0.9738   | 0.01944  | 0.00191 | 0.00055  | 20.26093 | 1.07284   | 3.5    | 0.19  | 5.43  |
| 43      | 0.352           | 27.56735            | 0.09643             | 0.23733             | 0.00345     | 0.00349  | 0.00085 | 36.94335 | 0.90646 | 0.43554  | 0.00634  | 0.00067 | 0.00013  | 17.36724 | 0.25781   | 3      | 0.04  | 1.33  |
| 44      | 0.3552          | 211.7838            | 2.47586             | 3.63136             | 0.09228     | 0.63966  | 0.01846 | 89.12248 | 2.37208 | 6.68018  | 0.1702   | 0.0037  | 0.00171  | 23.09283 | 5.04735   | 3.99   | 0.87  | 21.80 |
| 45      | 0.3628          | 97.31393            | 0.9284              | 1.24691             | 0.02259     | 0.27376  | 0.00601 | 83.04833 | 1.65226 | 2.28993  | 0.41502  | 0.00294 | 0.00065  | 16.50584 | 1.61791   | 2.85   | 0.28  | 9.82  |
| 46      | 0.363           | 1937.484            | 167.99694           | 129.235             | 11.33655    | 3.15556  | 0.30305 | 47.57866 | 1.98961 | 260.9442 | 25.18909 | 0.41357 | 0.04505  | 1117.646 | 114.80377 | 183.44 | 17.92 | 9.77  |
| 47      | 0.3757          | 39.32242            | 0.28319             | 1.06076             | 0.01668     | 0.07112  | 0.00261 | 53.26303 | 1.92798 | 1.94782  | 0.03064  | 0.00136 | 0.00024  | 18.37801 | 0.77067   | 3.17   | 0.13  | 4.10  |
| 48      | 0.3763          | 976.741             | 33.89552            | 31.31233            | 1.2619      | 2.5407   | 0.10457 | 76.60365 | 1.71697 | 58.75304 | 2.42132  | 0.17837 | 0.01007  | 233.6824 | 19.09304  | 39.93  | 3.23  | 8.09  |
| 49      | 0.3806          | 32.68158            | 0.3797              | 2.05607             | 0.03416     | 0.04389  | 0.00755 | 39.20583 | 6.81583 | 3.7781   | 0.06287  | 0.00859 | 0.0012   | 19.87933 | 2.24204   | 3.43   | 0.39  | 11.37 |
| 50      | 0.4015          | 336.2988            | 1.76266             | 0.409               |             |          |         |          |         |          |          |         |          |          |           |        |       |       |

|            |        |           |           |          |          |          |          |          |          |          |          |          |          |          |           |        |       |       |
|------------|--------|-----------|-----------|----------|----------|----------|----------|----------|----------|----------|----------|----------|----------|----------|-----------|--------|-------|-------|
| 81         | 0.7101 | 382.055   | 2.38874   | 0.31258  | 0.00826  | 1.21427  | 0.01254  | 93.91813 | 0.7731   | 0.57366  | 0.01516  | 0.0032   | 0.00059  | 23.23941 | 2.95785   | 4.01   | 0.51  | 12.72 |
| 82         | 0.7111 | 104.6722  | 3.18903   | 16.30991 | 0.58904  | 0.17663  | 0.04515  | 48.59304 | 12.67486 | 30.27516 | 1.10614  | 1.15757  | 0.03481  | 54.42053 | 13.53987  | 9.38   | 2.33  | 24.84 |
| 83         | 0.7329 | 127.6147  | 0.70577   | 0.09597  | 0.01118  | 0.36266  | 0.0049   | 83.98969 | 1.03575  | 0.1761   | 0.02052  | 0.00227  | 0.00037  | 20.42814 | 1.32667   | 3.53   | 0.23  | 6.52  |
| 84         | 0.7426 | 133.57469 | 0.21047   | 1.82719  | 0.03467  | 0.03448  | 0.00462  | 29.9281  | 4.06654  | 3.35698  | 0.06377  | 0.01358  | 0.00056  | 23.53601 | 1.37592   | 4.06   | 0.24  | 5.91  |
| 85         | 0.7525 | 30.99126  | 0.17496   | 1.53679  | 0.02216  | 0.04567  | 0.004    | 43.18104 | 3.81172  | 2.82286  | 0.04074  | 0.00172  | 0.00057  | 17.61117 | 1.18673   | 3.04   | 0.2   | 6.58  |
| 86         | 0.757  | 249.7768  | 3.67057   | 3.46382  | 0.07354  | 0.06145  | 0.00716  | 7.15609  | 0.84001  | 6.37122  | 0.1356   | 0.00573  | 0.0008   | 232.4436 | 4.02086   | 39.72  | 0.68  | 1.71  |
| 87         | 0.7571 | 9316.409  | 1817.8952 | 444.4011 | 86.8958  | 28.26423 | 5.5455   | 89.25612 | 1.84211  | 1188.379 | 338.6529 | 0.17431  | 0.07426  | 1458.764 | 484.53355 | 235.9  | 73.44 | 31.13 |
| 88         | 0.7655 | 45.95     | 0.39619   | 0.69154  | 0.02524  | 0.10016  | 0.00482  | 64.32717 | 3.05807  | 1.26949  | 0.04636  | 0.00147  | 0.00057  | 16.38908 | 1.41317   | 2.83   | 0.24  | 8.48  |
| 89         | 0.7672 | 813.5792  | 11.92463  | 10.76416 | 0.19664  | -0.09319 | 0.02392  | -3.49392 | 0.86726  | 19.90205 | 0.36635  | 0.01265  | 0.0023   | 848.4241 | 14.40361  | 140.93 | 2.3   | 1.63  |
| 90         | 0.7755 | 43.63271  | 0.2604    | 0.24284  | 0.02106  | 0.08449  | 0.0047   | 57.21227 | 3.17402  | 0.44565  | 0.03865  | 0.00105  | 0.00058  | 18.65994 | 1.39104   | 3.22   | 0.24  | 7.45  |
| 91         | 0.7767 | 429.4769  | 8.02986   | 12.80244 | 0.3422   | 0.87909  | 0.0399   | 60.24412 | 2.50657  | 23.70504 | 0.6394   | 0.03945  | 0.0052   | 172.2883 | 11.35104  | 29.52  | 1.93  | 6.54  |
| 92         | 0.7784 | 721.9978  | 11.68706  | 16.85581 | 0.37701  | 1.06067  | 0.03608  | 43.22045 | 1.30069  | 31.3007  | 0.70853  | 0.07728  | 0.00367  | 414.869  | 11.69798  | 70.29  | 1.94  | 2.76  |
| 93         | 0.7785 | 1206.432  | 170.53433 | 145.3769 | 20.59877 | 2.86877  | 0.45131  | 69.27497 | 4.85803  | 297.266  | 46.93943 | 0.49264  | 0.07714  | 413.0781 | 92.22485  | 69.99  | 15.33 | 21.90 |
| 94         | 0.79   | 52.80985  | 0.29451   | 0.83049  | 0.01968  | 0.12901  | 0.0036   | 72.10165 | 1.98609  | 1.52473  | 0.03615  | 0.00697  | 0.00048  | 14.73344 | 1.05489   | 2.54   | 0.18  | 7.09  |
| 95         | 0.7907 | 843.897   | 40.15111  | 15.34789 | 0.78797  | 2.72072  | 0.14407  | 95.12253 | 2.22307  | 28.46984 | 1.47767  | 0.11594  | 0.00966  | 41.61044 | 19.07438  | 7.17   | 3.28  | 45.75 |
| 96         | 0.7947 | 1057.27   | 11.1862   | 6.31109  | 0.09146  | 0.74829  | 0.01268  | 20.86566 | 0.27679  | 11.63182 | 0.16932  | 0.01299  | 0.00148  | 840.3854 | 9.40435   | 139.65 | 1.5   | 1.07  |
| 97         | 0.7977 | 940.159   | 11.35937  | 8.33729  | 0.1459   | 1.14304  | 0.02005  | 35.85461 | 0.46051  | 15.38839 | 0.27089  | 0.05151  | 0.0018   | 606.6215 | 8.59315   | 101.87 | 1.4   | 1.37  |
| 98         | 0.7983 | 1215.58   | 67.57443  | 42.363   | 2.38934  | 3.89323  | 0.23715  | 94.35692 | 2.36568  | 80.12748 | 4.6587   | 0.21081  | 0.01637  | 70.70999 | 29.92519  | 12.18  | 5.14  | 42.20 |
| 99         | 0.8015 | 587.2501  | 9.76313   | 9.06522  | 0.17941  | 0.72552  | 0.01707  | 36.38214 | 0.61221  | 16.7406  | 0.33345  | 0.04042  | 0.00184  | 375.9842 | 7.27899   | 63.82  | 1.21  | 1.90  |
| 100        | 0.8018 | 3345.484  | 262.37722 | 315.9202 | 24.84517 | 10.35914 | 0.82771  | 90.72245 | 1.40226  | 746.1393 | 75.5307  | 0.01327  | 0.01862  | 399.5106 | 72.63704  | 67.74  | 12.09 | 17.85 |
| 101        | 0.8046 | 602.0088  | 5.27141   | 5.94679  | 0.12618  | 0.47871  | 0.013    | 23.41765 | 0.6047   | 10.95755 | 0.23349  | 0.01049  | 0.00146  | 462.9541 | 5.48227   | 78.26  | 0.91  | 1.16  |
| 102        | 0.8047 | 2169.872  | 375.42891 | 134.2643 | 23.37204 | 4.62057  | 0.85655  | 62.41509 | 4.19327  | 272.1628 | 52.3395  | 0.3935   | 0.08623  | 900.963  | 199.45385 | 149.3  | 31.72 | 21.25 |
| 103        | 0.8143 | 51.56882  | 0.38538   | 0.49741  | 0.02124  | 0.11365  | 0.00428  | 65.08094 | 2.41318  | 0.913    | 0.039    | 0.00063  | 0.00041  | 18.0033  | 1.25331   | 3.11   | 0.22  | 7.07  |
| 104        | 0.8328 | 453.0261  | 1.82489   | 0.08984  | 0.00898  | 1.45374  | 0.0123   | 94.82944 | 0.70624  | 0.16485  | 0.01647  | 0.00347  | 0.00074  | 23.42395 | 3.20104   | 4.04   | 0.55  | 13.61 |
| 105        | 0.8415 | 98.14512  | 0.77279   | 0.80291  | 0.03023  | 0.25248  | 0.00686  | 75.9728  | 1.98069  | 1.47406  | 0.05552  | 0.00093  | 0.00065  | 23.58776 | 1.9543    | 4.07   | 0.34  | 8.35  |
| 106        | 0.8638 | 40.34263  | 0.23232   | 0.55648  | 0.01192  | 0.0704   | 0.00233  | 51.49269 | 1.68172  | 1.02146  | 0.02189  | 0.00817  | 0.00027  | 19.56241 | 0.68804   | 3.38   | 0.12  | 3.55  |
| 107        | 0.868  | 58.37339  | 0.49059   | 2.45281  | 0.04963  | 0.1658   | 0.01074  | 83.62652 | 5.39822  | 4.50838  | 0.09138  | 0.0169   | 0.00133  | 9.56948  | 3.15653   | 1.65   | 0.54  | 32.73 |
| 108        | 0.8778 | 20.53889  | 0.21614   | 0.81536  | 0.02349  | 0.01761  | 0.0043   | 25.05138 | 6.19284  | 1.49693  | 0.04315  | 0.00386  | 0.00049  | 15.38022 | 1.28151   | 2.66   | 0.22  | 8.27  |
| 109        | 0.8909 | 152.511   | 0.73662   | 3.14231  | 0.02585  | 0.44144  | 0.00424  | 85.37872 | 0.72577  | 5.77853  | 0.04764  | 0.01404  | 0.00042  | 22.3443  | 1.11837   | 3.86   | 0.19  | 4.92  |
| 110        | 0.8967 | 56.78506  | 0.52374   | 0.15057  | 0.13391  | 0.00715  | 69.69751 | 3.66823  | 0.27631  | 0.05103  | 0.00265  | 0.00079  | 17.20012 | 2.0886   | 2.97      | 0.36   | 12.12 |       |
| 111        | 0.9012 | 104.3335  | 0.8409    | 2.27944  | 0.0527   | 0.29737  | 0.00831  | 84.06674 | 2.25985  | 4.18921  | 0.09701  | 0.00574  | 0.00108  | 16.64581 | 2.36612   | 2.87   | 0.41  | 14.29 |
| 112        | 0.9251 | 25.97467  | 0.12366   | 0.08205  | 0.00616  | 0.03802  | 0.00176  | 43.27543 | 2.00014  | 0.15057  | 0.0113   | 0.00101  | 0.00026  | 14.71803 | 0.52429   | 2.54   | 0.09  | 3.54  |
| 113        | 0.9338 | 86.63584  | 0.46231   | 1.62994  | 0.02578  | 0.23177  | 0.00465  | 78.92567 | 1.53914  | 2.99416  | 0.04742  | 0.00174  | 0.00058  | 18.27271 | 1.34056   | 3.15   | 0.23  | 7.30  |
| 114        | 0.9439 | 34.47326  | 0.19118   | 0.13912  | 0.01683  | 0.0637   | 0.00412  | 54.61715 | 3.52927  | 0.25529  | 0.03089  | 0.0021   | 0.00046  | 15.633   | 1.21998   | 2.7    | 0.21  | 7.78  |
| 115        | 0.9566 | 40.74501  | 0.25271   | 0.62237  | 0.01554  | 0.07265  | 0.00339  | 52.60175 | 2.43806  | 1.14246  | 0.02854  | 0.00015  | 0.00028  | 19.30684 | 1.00083   | 3.33   | 0.17  | 5.11  |
| 116        | 0.9628 | 45.78662  | 0.50126   | 0.06904  | 0.02549  | 0.1028   | 0.0061   | 66.37489 | 3.87582  | 0.12669  | 0.04677  | -0.00014 | 0.0007   | 15.38657 | 1.78193   | 2.66   | 0.31  | 11.65 |
| 117        | 0.9717 | 52.14986  | 0.36368   | 0.68707  | 0.02148  | 0.12021  | 0.00425  | 68.04719 | 2.36819  | 1.26129  | 0.03945  | 0.00051  | 0.00061  | 16.66195 | 1.24121   | 2.88   | 0.21  | 7.29  |
| 118        | 0.9802 | 67.13125  | 0.41902   | 0.44458  | 0.02046  | 0.16305  | 0.00675  | 71.75076 | 2.94076  | 0.816    | 0.03756  | 0.00004  | 0.00066  | 18.96163 | 1.97835   | 3.27   | 0.34  | 10.40 |
| 119        | 0.9934 | 285.6066  | 1.40416   | 1.04865  | 0.02302  | 0.90475  | 0.01132  | 93.58872 | 1.07811  | 1.92555  | 0.04231  | 0.00331  | 0.00092  | 18.32271 | 3.08255   | 3.16   | 0.53  | 16.77 |
| 120        | 0.9984 | 81.82061  | 0.94562   | 0.08824  | 0.03347  | 0.21255  | 0.00823  | 76.78289 | 2.84061  | 0.16192  | 0.06142  | -0.00077 | 0.00079  | 18.99067 | 2.33477   | 3.28   | 0.4   | 12.20 |
| 121        | 1      | 427.0896  | 8.84027   | 2.58206  | 0.11208  | 1.37463  | 0.03705  | 95.06655 | 1.73603  | 4.74638  | 0.2064   | 0.00805  | 0.00327  | 21.10726 | 7.43996   | 3.64   | 1.28  | 35.16 |
| Integrated |        | 180.1925  | 0.126     | 2.24492  | 0.00329  | 0.44757  | 0.00087  | 73.30638 | 0.13305  | 4.12566  | 0.00606  | 0.00832  | 0.00007  | 48.16836 | 0.24264   | 8.3    | 0.06  | 0.72  |

# KOTSINA RIVER

Weighted average of J from standards = 9.588E-05 +/- 4.822E-07

| Grain # | Cumulative 40Ar/39Ar +/- meas. |          |           | 37Ar/39Ar +/- meas. |         |          | 36Ar/39Ar +/- meas. |          |          | % Atm. 40Ar | +/-      | Ca/K    | +/-     | Cl/K     | +/-       | 40*/39K | +/-   | Age (Ma) | +/- (Ma) | %error |
|---------|--------------------------------|----------|-----------|---------------------|---------|----------|---------------------|----------|----------|-------------|----------|---------|---------|----------|-----------|---------|-------|----------|----------|--------|
| 1       | 0.008                          | 24.02549 | 0.18065   | 0.94004             | 0.03653 | 0.07153  | 0.00434             | 87.76512 | 5.31576  | 1.72598     | 0.06711  | 0.03724 | 0.00129 | 2.93781  | 1.27687   | 0.51    | 0.22  | 43.14    |          |        |
| 2       | 0.0086                         | 913.1711 | 79.34373  | 106.2318            | 9.27393 | 1.24064  | 0.11715             | 39.18904 | 1.50144  | 210.7302    | 19.88864 | 0.04388 | 0.01563 | 600.3296 | 58.36766  | 100.85  | 9.54  | 9.46     |          |        |
| 3       | 0.0213                         | 400.189  | 1.5326    | 1.40796             | 0.02536 | 1.35086  | 0.00712             | 99.72591 | 0.38247  | 2.58598     | 0.04662  | 0.02458 | 0.00139 | 1.0979   | 1.53223   | 0.19    | 0.26  | 136.84   |          |        |
| 4       | 0.0241                         | 136.2886 | 2.25622   | 2.31878             | 0.10419 | 0.44036  | 0.02185             | 95.35931 | 4.46891  | 4.26162     | 0.19179  | 0.02823 | 0.00348 | 6.33372  | 6.10037   | 1.09    | 1.05  | 96.33    |          |        |
| 5       | 0.0353                         | 5.49809  | 0.05517   | 0.86315             | 0.02298 | 0.0185   | 0.00257             | 98.66835 | 13.89532 | 1.58472     | 0.04222  | 0.01239 | 0.00087 | 0.07286  | 0.76034   | 0.01    | 0.13  | 1300.00  |          |        |
| 6       | 0.0519                         | 2.96286  | 0.02365   | 0.73071             | 0.01856 | 0.00641  | 0.00272             | 62.51818 | 27.42339 | 1.34144     | 0.03409  | 0.00936 | 0.0005  | 1.09998  | 0.80493   | 0.19    | 0.14  | 73.68    |          |        |
| 7       | 0.0575                         | 7.33086  | 0.10725   | 1.12197             | 0.05119 | 0.01392  | 0.00706             | 55.08375 | 28.55781 | 2.0603      | 0.09408  | 0.0228  | 0.00137 | 3.28202  | 2.08795   | 0.57    | 0.36  | 63.16    |          |        |
| 8       | 0.0577                         | 3972.308 | 705.33358 | 1.9432              | 1.29855 | 10.61526 | 1.91179             | 78.96348 | 2.38209  | 3.5704      | 2.38922  | 0.02086 | 0.04296 | 836.7774 | 176.42331 | 139.07  | 28.22 | 20.29    |          |        |
| 9       | 0.0652                         | 0.82005  | 0.06541   | 1.3184              | 0.04159 | 0.00416  | 0.00451             | 141.632  | 169.1533 | 2.42134     | 0.07646  | 0.02258 | 0.00106 | -0.32936 | 1.33662   | -0.06   | 0.23  | -383.33  |          |        |
| 10      | 0.0737                         | 1148.534 | 7.52131   | 4.42571             | 0.04876 | 0.7253   | 0.01328             | 18.62967 | 0.31915  | 8.14603     | 0.09002  | 0.01114 | 0.00108 | 937.4718 | 7.17785   | 155.1   | 1.14  | 0.74     |          |        |
| 11      | 0.0885                         | 99.92529 | 0.77003   | 0.82956             | 0.0209  | 0.33888  | 0.00543             | 100.174  | 1.4225   | 1.52302     | 0.03839  | 0.01543 | 0.00064 | -0.1739  | 1.42182   | -0.03   | 0.25  | -833.33  |          |        |
| 12      | 0.0954                         | 63.90605 | 0.69791   | 0.77679             | 0.034   | 0.22595  | 0.00749             | 104.4255 | 3.27574  | 1.42608     | 0.06246  | 0.03219 | 0.00127 | -2.82836 | 2.09365   | -0.49   | 0.36  | -73.47   |          |        |
| 13      | 0.1085                         | 369.231  | 2.52122   | 0.59068             | 0.02009 | 1.26072  | 0.0115              | 100.8916 | 0.63002  | 1.08427     | 0.03689  | 0.01904 | 0.00138 | -3.29302 | 2.32646   | -0.57   | 0.4   | -70.18   |          |        |
| 14      | 0.1249                         | 1.24517  | 0.02815   | 0.44409             | 0.01907 | 0.00468  | 0.00315             | 110.6565 | 76.63372 | 0.8151      | 0.03502  | 0.01477 | 0.0006  | -0.12957 | 0.93167   | -0.02   | 0.16  | -800.00  |          |        |
| 15      | 0.1355                         | 870.5084 | 6.15437   | 1.06839             | 0.02863 | 2.85665  | 0.02699             | 96.96424 | 0.61072  | 1.96184     | 0.05262  | 0.0198  | 0.00139 | 26.4456  | 5.3243    | 4.56    | 0.92  | 20.18    |          |        |
| 16      | 0.1531                         | 20.15533 | 0.11523   | 0.43695             | 0.01838 | 0.06232  | 0.004               | 92.64294 | 5.84977  | 0.802       | 0.03374  | 0.00799 | 0.00057 | 1.48111  | 1.17778   | 0.26    | 0.2   | 76.92    |          |        |
| 17      | 0.1827                         | 50.81901 | 0.29531   | 0.63993             | 0.01281 | 0.11402  | 0.00218             | 66.23392 | 1.21975  | 1.17471     | 0.02353  | 0.00143 | 0.00026 | 17.15732 | 0.63093   | 2.96    | 0.01  | 3.72     |          |        |
| 18      | 0.1916                         | 207.7936 | 2.69897   | 0.84534             | 0.03743 | 0.72613  | 0.01537             | 103.2431 | 1.73543  | 1.55201     | 0.06877  | 0.02768 | 0.00135 | -6.74209 | 3.6082    | -1.17   | 0.62  | -52.99   |          |        |
| 19      | 0.2005                         | 1187.035 | 11.99882  | 6.74338             | 0.09067 | 1.11936  | 0.01569             | 27.81919 | 0.2712   | 12.43239    | 0.16796  | 0.02963 | 0.00113 | 860.8899 | 9.32941   | 142.92  | 1.49  | 1.04     |          |        |
| 20      | 0.2092                         | 9.24834  | 0.13243   | 1.17124             | 0.03029 | 0.02954  | 0.00435             | 93.63015 | 13.91873 | 2.15085     | 0.05567  | 0.03378 | 0.00119 | 0.5877   | 1.28443   | 0.1     | 0.22  | 220.00   |          |        |
| 21      | 0.2133                         | 11.8684  | 0.25114   | 0.10783             | 0.05474 | 0.03226  | 0.00426             | 79.81674 | 10.5776  | 1.86893     | 0.10059  | 0.02193 | 0.00201 | 2.39116  | 1.25661   | 0.41    | 0.22  | 53.66    |          |        |
| 22      | 0.2263                         | 803.3025 | 6.64452   | 0.89976             | 0.02112 | 2.68635  | 0.02972             | 98.81339 | 0.72872  | 1.65199     | 0.03881  | 0.03122 | 0.00186 | 9.53776  | 5.85809   | 1.65    | 1.01  | 61.21    |          |        |
| 23      | 0.2283                         | 611.8766 | 12.75114  | 11.25197            | 0.29692 | 1.02459  | 0.02549             | 49.33236 | 0.68327  | 20.81119    | 0.55358  | 0.01644 | 0.00541 | 312.4917 | 7.8421    | 53.2    | 1.32  | 2.48     |          |        |
| 24      | 0.2403                         | 8.01439  | 0.11478   | 1.09345             | 0.02822 | 0.02338  | 0.00213             | 85.40787 | 7.80803  | 2.00787     | 0.05186  | 0.03919 | 0.00115 | 1.16604  | 0.62469   | 0.2     | 0.11  | 55.00    |          |        |
| 25      | 0.2529                         | 18.82145 | 0.1407    | 0.89504             | 0.02308 | 0.05436  | 0.00985             | 85.09206 | 15.47176 | 1.64332     | 0.04239  | 0.03198 | 0.00083 | 2.80324  | 2.90941   | 0.48    | 0.5   | 104.17   |          |        |
| 26      | 0.2636                         | 76.04119 | 0.79814   | 2.13134             | 0.06444 | 0.25143  | 0.00494             | 97.5151  | 1.63829  | 3.91662     | 0.11859  | 0.02997 | 0.00076 | 1.89166  | 1.24759   | 0.33    | 0.22  | 66.67    |          |        |
| 27      | 0.2726                         | 503.1789 | 6.38052   | 0.70565             | 0.02374 | 1.69356  | 0.02444             | 99.45124 | 0.70731  | 1.29542     | 0.0436   | 0.02294 | 0.00144 | 2.76247  | 3.56139   | 0.48    | 0.62  | 129.17   |          |        |
| 28      | 0.3073                         | 90.1223  | 0.63913   | 0.35497             | 0.00855 | 0.3052   | 0.00377             | 100.0733 | 1.03839  | 0.65148     | 0.0157   | 0.02178 | 0.00043 | -0.06606 | 0.93573   | -0.01   | 0.16  | -1600.00 |          |        |
| 29      | 0.3184                         | 147.8736 | 1.04988   | 0.68141             | 0.02737 | 0.48543  | 0.00785             | 96.98599 | 1.42121  | 1.25089     | 0.05027  | 0.02824 | 0.0011  | 4.58187  | 2.10297   | 0.77    | 0.36  | 46.75    |          |        |
| 30      | 0.3365                         | 12.37521 | 0.09383   | 0.38969             | 0.01562 | 0.03865  | 0.00207             | 92.25333 | 4.92347  | 0.71523     | 0.02867  | 0.02761 | 0.00062 | 0.95663  | 0.60817   | 0.17    | 0.11  | 64.71    |          |        |
| 31      | 0.3448                         | 38.69087 | 0.19951   | 0.70935             | 0.02814 | 0.13286  | 0.00372             | 101.397  | 2.81448  | 1.30222     | 0.05168  | 0.03475 | 0.00095 | -0.54037 | 1.08857   | -0.09   | 0.19  | -211.11  |          |        |
| 32      | 0.3604                         | 1.33733  | 0.02204   | 1.07695             | 0.01849 | 0.00503  | 0.00263             | 106.7721 | 59.36139 | 1.97756     | 0.03397  | 0.03734 | 0.00051 | -0.08862 | 0.7768    | -0.02   | 0.13  | -650.00  |          |        |
| 33      | 0.3708                         | 16.64053 | 0.16321   | 1.06865             | 0.03447 | 0.05246  | 0.00322             | 92.79996 | 5.67321  | 1.96231     | 0.06335  | 0.04598 | 0.00107 | 1.19689  | 0.94332   | 0.21    | 0.16  | 76.19    |          |        |
| 34      | 0.3817                         | 25.11872 | 0.17351   | 0.37467             | 0.02494 | 0.07607  | 0.00369             | 89.47141 | 4.30985  | 0.68764     | 0.04579  | 0.02626 | 0.00118 | 2.64214  | 1.08192   | 0.46    | 0.19  | 41.30    |          |        |
| 35      | 0.3924                         | 7.91513  | 0.06663   | 0.52625             | 0.02461 | 0.02767  | 0.00313             | 103.1294 | 11.71151 | 0.96595     | 0.04519  | 0.0139  | 0.00073 | -0.24686 | 0.92381   | -0.04   | 0.16  | -400.00  |          |        |
| 36      | 0.393                          | 2535.143 | 133.38218 | 35.68623            | 1.9816  | 5.98441  | 0.32166             | 69.63899 | 0.77878  | 67.17221    | 3.8264   | 0.04214 | 0.01108 | 789.5624 | 47.24332  | 131.5   | 7.59  | 5.77     |          |        |
| 37      | 0.4029                         | 4.35526  | 0.00870   | 1.42402             | 0.0229  | 0.01545  | 0.00298             | 102.8638 | 20.35734 | 2.61552     | 0.04211  | 0.01563 | 0.00097 | -0.124   | 0.88143   | 0.02    | 0.15  | -750.00  |          |        |
| 38      | 0.4126                         | 45.05435 | 0.45173   | 1.05628             | 0.02815 | 0.14903  | 0.00413             | 97.61491 | 2.55932  | 1.93957     | 0.05172  | 0.02721 | 0.00086 | 1.07468  | 1.1536    | 0.19    | 0.2   | 105.26   |          |        |
| 39      | 0.421                          | 7.62515  | 0.10244   | 1.43876             | 0.03792 | 0.02265  | 0.00391             | 86.56488 | 15.96656 | 2.64261     | 0.06973  | 0.02825 | 0.0012  | 1.0215   | 1.15583   | 0.18    | 0.2   | 111.11   |          |        |
| 40      | 0.4283                         | 1220.779 | 16.91637  | 5.08119             | 0.10261 | 1.1051   | 0.02045             | 26.71619 | 0.32845  | 9.35687     | 0.18962  | 0.01083 | 0.0013  | 897.8339 | 13.12306  | 148.81  | 2.09  | 1.40     |          |        |
| 41      | 0.4357                         | 1.91695  | 0.06796   | 0.98935             | 0.04437 | 0.00077  | 0.00589             | 7.70238  | 92.2324  | 1.8166      | 0.08153  | 0.01019 | 0.00097 | 1.74312  | 1.7432    | 0.3     | 0.3   | 100.00   |          |        |
| 42      | 0.4387                         | 889.3476 | 21.36114  | 24.91074            | 0.60418 | 0.17166  | 0.01349             | 5.47283  | 0.46627  | 46.52628    | 1.2171   | 0.09926 | 0.00347 | 855.7014 | 21.27781  | 142.09  | 3.4   | 2.39     |          |        |

|    |        |          |           |          |          |          |          |          |          |          |          |          |         |          |           |         |         |          |
|----|--------|----------|-----------|----------|----------|----------|----------|----------|----------|----------|----------|----------|---------|----------|-----------|---------|---------|----------|
| 43 | 0.4501 | 17.59785 | 0.13904   | 0.99175  | 0.0191   | 0.06021  | 0.00382  | 100.8095 | 6.38896  | 1.82099  | 0.0351   | 0.03749  | 0.00091 | -0.14232 | 1.1232    | -0.02   | 0.19    | -950.00  |
| 44 | 0.4501 | 15133.58 | 5868.4158 | 1114.77  | 432.3235 | 31.92197 | 12.40851 | 61.72404 | 1.68681  | 9615.082 | 17528.36 | 2.5216   | 1.24281 | 27229.02 | 49651.271 | 2313.63 | 2375.91 | 102.69   |
| 45 | 0.4587 | 1.26863  | 0.04527   | 1.43922  | 0.04237  | -0.00093 | 0.00415  | -31.8529 | 98.91046 | 2.64346  | 0.07791  | 0.02584  | 0.00095 | 1.63527  | 1.22754   | 0.28    | 0.21    | 75.00    |
| 46 | 0.4737 | 45.45452 | 0.30797   | 0.67196  | 0.01557  | 0.14899  | 0.00364  | 96.80215 | 2.29083  | 0.02859  | 0.03302  | 0.00063  | 1.45331 | 1.04142  | 0.25      | 0.18    | 72.00   |          |
| 47 | 0.4873 | 20.22346 | 0.19178   | 1.05919  | 0.01958  | 0.06422  | 0.00284  | 93.54196 | 4.07045  | 1.94492  | 0.03599  | 0.04503  | 0.00107 | 1.3051   | 0.82279   | 0.23    | 0.14    | 60.87    |
| 48 | 0.4943 | 899.5536 | 9.73615   | 1.87192  | 0.03998  | 0.07891  | 0.00507  | 2.57526  | 1.06424  | 3.43927  | 0.07356  | 0.00028  | 0.00112 | 877.519  | 9.62532   | 145.57  | 1.53    | 1.05     |
| 49 | 0.4954 | 1480.313 | 55.85134  | 26.86742 | 1.07483  | 2.0554   | 0.09287  | 40.881   | 1.02349  | 50.25151 | 2.04919  | 0.01544  | 0.00946 | 892.0549 | 37.65406  | 147.89  | 5.99    | 4.05     |
| 50 | 0.4981 | 1208.841 | 21.06764  | 15.78099 | 0.30275  | 1.33908  | 0.03043  | 32.62677 | 0.48156  | 29.2823  | 0.5681   | 0.02542  | 0.0042  | 823.5941 | 15.70315  | 136.96  | 2.51    | 1.83     |
| 51 | 0.5179 | 52.2915  | 0.21381   | 0.83527  | 0.01486  | 0.17307  | 0.00302  | 97.72454 | 1.66683  | 1.53351  | 0.02729  | 0.02222  | 0.00082 | 1.1899   | 0.87171   | 0.21    | 0.15    | 71.43    |
| 52 | 0.5353 | 406.8759 | 3.4595    | 0.9334   | 0.01855  | 1.36652  | 0.01634  | 99.23411 | 0.83674  | 1.71379  | 0.03408  | 0.02307  | 0.00091 | 3.11803  | 3.40666   | 0.54    | 0.59    | 109.26   |
| 53 | 0.5432 | 89.04692 | 1.03634   | 1.5604   | 0.04265  | 0.31048  | 0.00759  | 102.9207 | 2.22924  | 2.86628  | 0.07844  | 0.03031  | 0.00144 | -2.60277 | 1.98646   | -0.45   | 0.34    | -75.56   |
| 54 | 0.5546 | 17.77561 | 0.15363   | 1.48428  | 0.02648  | 0.05564  | 0.00414  | 91.96134 | 6.85287  | 2.72631  | 0.04868  | 0.04285  | 0.00111 | 1.42803  | 1.21758   | 0.25    | 0.21    | 84.00    |
| 55 | 0.5605 | 75.56049 | 0.83551   | 0.91616  | 0.055    | 0.25663  | 0.00793  | 100.3001 | 2.91257  | 1.68212  | 0.10104  | 0.01953  | 0.00152 | -0.2268  | 2.20128   | -0.04   | 0.38    | -950.00  |
| 56 | 0.5681 | 11.95832 | 0.17029   | 0.73641  | 0.03632  | 0.04536  | 0.00509  | 111.8619 | 12.52933 | 1.35191  | 0.06672  | 0.02457  | 0.00125 | -1.4157  | 1.49521   | -0.24   | 0.26    | -108.33  |
| 57 | 0.5848 | 3.96966  | 0.03442   | 0.64756  | 0.01958  | 0.01106  | 0.00283  | 81.62459 | 21.23248 | 1.18872  | 0.03596  | 0.02263  | 0.00056 | 0.72432  | 0.83707   | 0.13    | 0.14    | 107.69   |
| 58 | 0.5862 | 1340.325 | 59.92251  | 20.44034 | 0.98856  | 1.23159  | 0.06076  | 27.02766 | 0.56788  | 38.05454 | 1.8674   | 0.00621  | 0.00445 | 992.3705 | 45.68612  | 163.78  | 7.21    | 4.40     |
| 59 | 0.601  | 77.24298 | 0.61436   | 1.04555  | 0.02847  | 0.25962  | 0.0057   | 99.24721 | 2.0548   | 1.91986  | 0.05231  | 0.0446   | 0.00116 | 0.58169  | 1.58788   | 0.1     | 0.27    | 270.00   |
| 60 | 0.6101 | 5.18165  | 0.06374   | 0.86418  | 0.03599  | 0.01878  | 0.00431  | 106.3225 | 24.69748 | 1.58662  | 0.06611  | 0.03914  | 0.00111 | -0.32593 | 1.2731    | -0.06   | 0.22    | -366.67  |
| 61 | 0.616  | 41.95543 | 0.53952   | 1.27116  | 0.02732  | 0.14473  | 0.00614  | 101.7563 | 4.13435  | 2.3345   | 0.05021  | 0.02732  | 0.0017  | -0.73698 | 1.73486   | -0.13   | 0.3     | -230.77  |
| 62 | 0.6183 | 44.76867 | 1.20469   | 2.22442  | 0.10664  | 0.12384  | 0.01047  | 81.38408 | 6.59511  | 4.08793  | 0.19628  | 0.03177  | 0.00412 | 8.34168  | 2.96784   | 1.44    | 0.51    | 35.42    |
| 63 | 0.643  | 191.7409 | 0.84359   | 0.91758  | 0.01205  | 0.65079  | 0.00673  | 100.2719 | 0.9502   | 1.68472  | 0.02213  | 0.02692  | 0.00068 | -0.5215  | 1.82277   | -0.09   | 0.31    | -344.44  |
| 64 | 0.6532 | 3.10086  | 0.05447   | 0.97569  | 0.02169  | 0.0049   | 0.00373  | 44.52922 | 35.89467 | 1.7915   | 0.03985  | 0.01667  | 0.00087 | 1.70478  | 1.1041    | 0.29    | 0.19    | 65.52    |
| 65 | 0.6601 | 27.89555 | 0.40061   | 0.98898  | 0.02985  | 0.07628  | 0.00598  | 80.59869 | 6.24347  | 1.81591  | 0.05486  | 0.00511  | 0.00122 | 5.41012  | 1.74342   | 0.93    | 0.3     | 32.26    |
| 66 | 0.6654 | 2.86305  | 0.10949   | 1.44007  | 0.05941  | -0.00116 | 0.00605  | -16.2761 | 63.10597 | 2.64501  | 0.10923  | 0.00767  | 0.00138 | 3.29789  | 1.79336   | 0.57    | 0.31    | 54.39    |
| 67 | 0.6705 | 5.32433  | 0.08798   | 0.86147  | 0.0596   | 0.01914  | 0.00747  | 105.4859 | 41.7192  | 1.58164  | 0.10948  | 0.04341  | 0.0016  | -0.29063 | 2.21011   | -0.05   | 0.38    | -760.00  |
| 68 | 0.6714 | 1116.866 | 33.75935  | 19.10004 | 0.66279  | 1.54108  | 0.0834   | 40.63394 | 1.83221  | 35.52514 | 1.24961  | 0.02285  | 0.00909 | 672.0878 | 29.25279  | 112.53  | 4.75    | 4.22     |
| 69 | 0.6828 | 12.3524  | 0.14034   | 0.97864  | 0.03702  | 0.04322  | 0.00425  | 102.9788 | 10.13313 | 1.79691  | 0.06802  | 0.03884  | 0.00072 | -0.36732 | 1.24948   | -0.06   | 0.22    | -366.67  |
| 70 | 0.6927 | 3.23061  | 0.05452   | 0.71733  | 0.02928  | 0.01146  | 0.00428  | 103.9754 | 39.57016 | 1.31688  | 0.05379  | 0.02185  | 0.00087 | -0.12731 | 1.26718   | -0.02   | 0.22    | -1100.00 |
| 71 | 0.6973 | 68.58607 | 1.88852   | 0.47042  | 0.05706  | 0.02367  | 0.01293  | 100.2331 | 4.85693  | 0.86345  | 0.10476  | 0.02659  | 0.00178 | -0.15987 | 3.33082   | -0.03   | 0.58    | -1933.33 |
| 72 | 0.6982 | 1237.857 | 72.84992  | 18.32913 | 1.14259  | 1.54589  | 0.10876  | 36.78223 | 1.42622  | 30.07247 | 2.15185  | 0.11678  | 0.01115 | 792.7891 | 50.56625  | 132.02  | 8.12    | 6.15     |
| 73 | 0.7027 | 2.11156  | 0.08448   | 1.05733  | 0.04444  | -0.00038 | 0.00566  | -9.64613 | 80.3894  | 1.94151  | 0.08166  | 0.01149  | 0.00123 | 2.28441  | 1.67702   | 0.39    | 0.29    | 74.36    |
| 74 | 0.7074 | 1122.094 | 18.32865  | 58.04952 | 0.96395  | 1.19625  | 0.02638  | 31.07728 | 0.46819  | 111.0661 | 1.92316  | 0.00822  | 0.0018  | 806.4176 | 14.80037  | 134.21  | 2.37    | 1.77     |
| 75 | 0.7284 | 48.81674 | 0.26794   | 0.68696  | 0.01322  | 0.16142  | 0.00366  | 97.65418 | 2.1666   | 1.26109  | 0.02428  | 0.0135   | 0.00046 | 1.14501  | 1.05774   | 0.2     | 0.18    | 90.00    |
| 76 | 0.7325 | 57.81212 | 1.16275   | 0.86155  | 0.06992  | 0.18959  | 0.01117  | 96.83251 | 5.37455  | 1.58179  | 0.12845  | 0.02397  | 0.00183 | 1.83137  | 3.1078    | 0.32    | 0.54    | 168.75   |
| 77 | 0.7356 | 1981.392 | 37.29262  | 12.00582 | 0.24944  | 2.71893  | 0.05471  | 40.50012 | 0.89892  | 22.21741 | 0.46555  | 0.00831  | 0.00322 | 1188.99  | 23.30939  | 194.54  | 3.62    | 1.86     |
| 78 | 0.7383 | 363.8231 | 7.9562    | 1.14516  | 0.09002  | 1.23325  | 0.03479  | 100.1476 | 1.26109  | 1.510291 | 0.16543  | 0.02435  | 0.00274 | -0.53735 | 6.58825   | -0.09   | 1.14    | -1266.67 |
| 79 | 0.7486 | 39.94247 | 0.26682   | 0.26436  | 0.02265  | 0.07238  | 0.00581  | 53.53413 | 4.29053  | 0.48516  | 0.04157  | 0.00138  | 0.00093 | 18.54928 | 1.71835   | 3.2     | 0.3     | 9.38     |
| 80 | 0.7491 | 1496.484 | 173.65431 | 31.68036 | 2.9858   | 1.86846  | 0.18275  | 36.72127 | 1.23083  | 59.45939 | 5.73216  | 0.0274   | 0.01385 | 968.6086 | 9.08991   | 160.03  | 14.72   | 9.20     |
| 81 | 0.7562 | 31.8216  | 0.34392   | 0.86809  | 0.03963  | 0.10471  | 0.00567  | 97.10369 | 5.20008  | 1.59381  | 0.07281  | 0.02634  | 0.00165 | 0.92136  | 1.6546    | 0.16    | 0.29    | 181.25   |
| 82 | 0.7571 | 1531.15  | 73.75634  | 14.46485 | 0.76327  | 1.15175  | 0.06404  | 22.1505  | 0.62045  | 26.81494 | 1.42956  | 0.04428  | 0.00931 | 1204.272 | 59.41895  | 196.91  | 9.2     | 4.67     |
| 83 | 0.7613 | 2194.814 | 34.33809  | 2.59081  | 0.08698  | 3.57719  | 0.06857  | 48.15266 | 0.5343   | 4.7625   | 0.16017  | 0.00674  | 0.00351 | 1140.023 | 21.39604  | 186.93  | 3.33    | 1.78     |
| 84 | 0.7783 | 16.27585 | 0.12938   | 0.96838  | 0.02012  | 0.05187  | 0.00237  | 93.86261 | 4.291    | 1.77806  | 0.03697  | 0.04271  | 0.00081 | 0.99777  | 0.69805   | 0.17    | 0.12    | 70.59    |
| 85 | 0.7803 | 71.70555 | 1.63272   | 3.5963   | 0.15196  | 0.25402  | 0.03164  | 104.3109 | 12.85428 | 6.61552  | 0.28024  | 0.02431  | 0.00283 | -3.09775 | 9.2363    | -0.54   | 1.6     | -296.30  |
| 86 | 0.7858 | 155.094  | 2.04844   | 1.23632  | 0.05022  | 0.53961  | 0.01492  | 102.7658 | 2.52032  | 2.27046  | 0.09231  | 0.02685  | 0.00171 | -4.29256 | 3.911     | -0.74   | 0.68    | -91.89   |
| 87 | 0.7904 | -16.638  | 0.25882   | 0.55968  | 0.04486  | -0.06995 | 0.01409  | 124.2834 | 24.93417 | 1.02735  | 0.08237  | 0.00236  | 0.00159 | 4.04907  | 4.15726   | 0.7     | 0.72    | 102.86   |
| 88 | 0.7908 | 1150.044 | 129.49454 | 0.86076  | 0.80043  | 1.6992   | 0.06021  | 43.65537 | 4.53015  | 1.58033  | 1.47047  | 0.0191   | 0.02341 | 648.3655 | 89.76869  | 108.68  | 14.6    | 13.43    |
| 89 | 0.7947 | 19.14404 | 0.37906   | 1.66335  | 0.07088  | 0.03919  | 0.01765  | 59.87603 | 27.28009 | 3.0556   | 0.13037  | 0.02723  | 0.00249 | 7.67847  | 5.22451   | 1.33    | 0.9     | 67.67    |
| 90 | 0.7949 | 3149.837 | 589.58821 | 48.86663 | 9.24077  | 7.59423  | 1.47084  | 71.11751 | 3.55651  | 92.86846 | 18.18932 | 0.00617  | 0.03183 | 942.261  | 216.50257 | 155.86  | 34.31   | 22.01    |
| 91 | 0.7962 | 222.3536 | 6.73367   | 0.17891  | 0.21583  | 0.61993  | 0.04     | 82.39145 | 4.71126  | 0.32831  | 0.39612  | -0.00044 | 0.00747 | 39.15296 | 10.55026  | 6.75    | 1.82    | 26.96    |
| 92 | 0.8046 | 5.15956  | 0.0832    | 0.81495  | 0.03731  | 0.01606  | 0.00496  | 91.21782 | 28.58693 | 1.49618  | 0.06854  | 0.0269   | 0.00104 | 0.45077  | 1.46761   | 0.08    | 0.25    | 312.50   |
| 93 | 0.8101 | 19.35599 | 0.35369   | 1.2685   | 0.0566   | 0.06008  | 0.00709  | 91.31443 | 10.74874 | 2.32961  | 0.10403  | 0.02178  | 0.00154 | 1.68011  | 2.08009   | 0.29    | 0.36    | 124.14   |
| 94 | 0.8267 | -1.78645 | 0.04292   | 0.53971  | 0.01529  | -0.00999 | 0.00299  | 164.9293 | 48.70842 | 0.99067  | 0.02807  | 0.02489  | 0.00068 | 1.17966  | 0.88337   | 0.2     | 0.15    | 75.00    |
| 95 | 0.8397 | 21.98681 | 0.15608   | 1.13059  | 0.02409  | 0.07369  | 0.00301  | 98.74326 | 4.00973  | 2.07614  | 0.04426  | 0.02807  | 0.00065 | 0.27616  | 0.8812    | 0.05    | 0.15    | 300.00   |
| 96 | 0.8424 | 1377.325 | 27.47626  | 16.70583 | 0.35072  | 1.51199  | 0.05903  | 32.33992 | 1.08979  | 31.01885 | 0.65898  | 0.01411  | 0.00357 | 943.0046 | 24.37487  | 155.98  | 3.86    | 2.47     |
| 97 | 0.8663 | 6.60943  | 0.04636   | 0.28488  | 0.00847  | 0.01487  | 0.00146  | 66.42776 | 6.56986  | 0.52281  | 0.01555  | 0.00925  | 0.00036 | 2.20941  | 0.43291   | 0.38    | 0.07    | 18.42    |
| 98 | 0.8699 | 23.22624 | 0.56451   | 0.9761   | 0.05079  | 0.06072  | 0.00985  | 77.00527 | 12.41639 | 1.79225  | 0.09333  | 0.03469  | 0.00218 | 5.3      |           |         |         |          |

|    |        |          |          |          |         |          |           |          |            |          |         |          |         |          |           |        |       |          |
|----|--------|----------|----------|----------|---------|----------|-----------|----------|------------|----------|---------|----------|---------|----------|-----------|--------|-------|----------|
| 5  | 0.0369 | 16.63057 | 0.19281  | 1.05278  | 0.04634 | 0.05977  | 0.00406   | 105.8613 | 7.13386    | 1.93314  | 0.08515 | 0.02727  | 0.00158 | -0.97376 | 1.1851    | -0.17  | 0.2   | -117.65  |
| 6  | 0.0443 | 107.4284 | 1.68069  | 1.27327  | 0.07207 | 0.36095  | 0.00766   | 99.21374 | 1.46187    | 2.33837  | 0.13248 | 0.03047  | 0.00179 | 0.8452   | 1.57181   | 0.15   | 0.27  | 180.00   |
| 7  | 0.0462 | 5.07409  | 0.21892  | 2.1422   | 0.2226  | 0.00708  | 0.02336   | 37.98049 | 136.8324   | 3.93659  | 0.40968 | 0.02763  | 0.00462 | 3.13328  | 6.91505   | 0.54   | 1.19  | 220.37   |
| 8  | 0.0487 | 51.10773 | 1.32443  | 1.9427   | 0.17537 | 0.14191  | 0.01489   | 81.78496 | 8.36872    | 3.36949  | 0.32267 | 0.00981  | 0.00372 | 9.31667  | 4.28944   | 1.61   | 0.74  | 45.96    |
| 9  | 0.0567 | 1.83701  | 0.04304  | 0.85048  | 0.0374  | 0.00676  | 0.00371   | 106.5933 | 60.7385    | 1.56145  | 0.06871 | 0.02011  | 0.00117 | -0.11923 | 1.09833   | -0.02  | 0.19  | -950.00  |
| 10 | 0.0633 | 54.5735  | 0.86357  | 6.6037   | 0.12474 | 0.16295  | 0.00995   | 87.28419 | 5.22521    | 12.17365 | 0.23103 | 0.01571  | 0.0015  | 6.9682   | 2.86703   | 1.2    | 0.5   | 41.67    |
| 11 | 0.0744 | 54.6346  | 0.34271  | 1.01657  | 0.02779 | 0.17895  | 0.00609   | 96.68563 | 3.25049    | 1.86661  | 0.05107 | 0.01714  | 0.00066 | 1.81111  | 1.77648   | 0.31   | 0.31  | 100.00   |
| 12 | 0.0807 | 44.34486 | 0.63208  | 6.3095   | 0.12005 | 0.10936  | 0.00564   | 71.75052 | 3.6372     | 11.62888 | 0.22225 | 0.00641  | 0.00172 | 12.57487 | 1.63283   | 2.17   | 0.28  | 12.90    |
| 13 | 0.0944 | 4.03058  | 0.04409  | 0.79142  | 0.032   | -0.00246 | 0.00235   | -19.8182 | 17.34419   | 1.45295  | 0.05878 | 0.00688  | 0.00057 | 4.79649  | 0.69595   | 0.83   | 0.12  | 14.46    |
| 14 | 0.1123 | 8.30724  | 0.06244  | 1.25965  | 0.02975 | 0.01592  | 0.00151   | 55.57457 | 5.3682     | 2.31335  | 0.05468 | 0.016    | 0.00066 | 3.68062  | 0.44595   | 0.64   | 0.08  | 12.50    |
| 15 | 0.1398 | 17.22459 | 0.07256  | 1.20411  | 0.0238  | 0.04632  | 0.00173   | 79.02666 | 2.96475    | 2.21125  | 0.04374 | 0.01014  | 0.00085 | 3.60942  | 0.51069   | 0.62   | 0.09  | 14.52    |
| 16 | 0.1398 | 156.718  | 44.21705 | 695.8339 | 196.089 | 1.08886  | 0.60462   | 168.727  | 98.28526   | 2510.381 | 1390.97 | -0.21071 | 0.11732 | -211.755 | 324.68361 | -36.96 | 57.26 | -154.92  |
| 17 | 0.1432 | 2.75903  | 0.13045  | 1.45686  | 0.11741 | 0.00527  | 0.0059    | 52.65747 | 63.93919   | 2.67589  | 0.21588 | 0.02542  | 0.00233 | 1.29348  | 1.75006   | 0.22   | 0.3   | 136.36   |
| 18 | 0.1499 | 31.71518 | 0.3903   | 1.09761  | 0.06834 | 0.10072  | 0.00473   | 93.64555 | 4.27724    | 2.01553  | 0.12559 | 0.02556  | 0.00102 | 2.015    | 1.35706   | 0.35   | 0.23  | 65.71    |
| 19 | 0.1764 | 8.92056  | 0.05258  | 0.88456  | 0.02045 | 0.02263  | 0.00232   | 74.37762 | 7.72047    | 1.62406  | 0.03756 | 0.01314  | 0.00046 | 2.27948  | 0.68733   | 0.39   | 0.12  | 30.77    |
| 20 | 0.1836 | 46.29738 | 0.66113  | 1.72426  | 0.06726 | 0.14535  | 0.00691   | 92.52135 | 4.22048    | 3.16763  | 0.12371 | 0.02845  | 0.00139 | 3.46442  | 1.95626   | 0.6    | 0.34  | 56.67    |
| 21 | 0.1961 | 3.91937  | 0.04963  | 1.05877  | 0.04142 | 0.0169   | 0.00391   | 126.144  | 29.71873   | 1.94415  | 0.07611 | 0.01781  | 0.0009  | -1.01768 | 1.15639   | -0.18  | 0.2   | -111.11  |
| 22 | 0.2024 | 101.4263 | 1.75293  | 4.18015  | 0.09562 | 0.31213  | 0.00926   | 90.62345 | 2.20388    | 7.6927   | 0.17648 | 0.00794  | 0.00146 | 9.53567  | 2.24836   | 1.65   | 0.39  | 23.64    |
| 23 | 0.2227 | 57.9002  | 0.36162  | 0.85249  | 0.02531 | 0.18877  | 0.00387   | 96.27057 | 1.88728    | 1.56515  | 0.04649 | 0.02639  | 0.00059 | 2.15954  | 1.09307   | 0.37   | 0.19  | 51.35    |
| 24 | 0.2301 | 677.3242 | 8.66085  | 3.01153  | 0.06879 | 2.17988  | 0.04049   | 95.0691  | 1.28547    | 5.70338  | 0.12677 | 0.00546  | 0.00216 | 33.47    | 8.73755   | 5.77   | 1.5   | 26.00    |
| 25 | 0.2396 | 99.54478 | 1.00002  | 1.06882  | 0.04922 | 0.3472   | 0.00792   | 103.0078 | 2.14334    | 1.96263  | 0.09045 | 0.02653  | 0.00129 | -2.99543 | 2.13386   | -0.52  | 0.37  | -71.15   |
| 26 | 0.2459 | 11.76162 | 0.12997  | 1.68374  | 0.09151 | 0.01808  | 0.00626   | 40.13427 | 15.76582   | 14.17552 | 0.16975 | 0.02471  | 0.00124 | 7.06182  | 1.86222   | 1.22   | 0.32  | 26.23    |
| 27 | 0.2509 | 107.8649 | 2.47845  | 4.39533  | 0.15212 | 0.34869  | 0.01422   | 95.21627 | 3.22929    | 8.08994  | 0.28085 | 0.01446  | 0.00215 | 5.17461  | 3.49572   | 0.89   | 0.6   | 67.42    |
| 28 | 0.2831 | 70.21665 | 0.35444  | 0.67749  | 0.01901 | 0.22511  | 0.00469   | 94.6938  | 1.92174    | 1.2437   | 0.03491 | 0.00379  | 0.00044 | 3.72604  | 1.34984   | 0.64   | 0.23  | 35.94    |
| 29 | 0.309  | 151.3562 | 0.88574  | 0.56298  | 0.01379 | 0.46033  | 0.00542   | 89.8602  | 0.93307    | 1.03341  | 0.02532 | 0.00234  | 0.00058 | 15.3503  | 1.41795   | 2.65   | 0.24  | 9.06     |
| 30 | 0.3511 | 160.5622 | 0.92931  | 0.54196  | 0.01024 | 0.51892  | 0.00522   | 95.49159 | 0.79296    | 0.99481  | 0.01881 | 0.00704  | 0.00056 | 7.24023  | 1.27463   | 1.25   | 0.22  | 17.60    |
| 31 | 0.3573 | 193.1912 | 1.7086   | 6.72186  | 0.09297 | 0.64194  | 0.0115    | 97.91771 | 1.53991    | 12.39251 | 0.17222 | 0.02115  | 0.00192 | 4.04137  | 2.98934   | 0.7    | 0.52  | 74.29    |
| 32 | 0.3616 | 82.6583  | 1.47827  | 11.52778 | 0.25608 | 0.25932  | 0.01197   | 91.58976 | 3.95739    | 21.32551 | 0.47761 | 0.025    | 0.00371 | 7.00633  | 3.30009   | 1.21   | 0.57  | 47.11    |
| 33 | 0.3702 | 54.43726 | 0.52919  | 1.1292   | 0.03309 | 0.17593  | 0.0041    | 95.38012 | 2.03888    | 2.07359  | 0.06082 | 0.01935  | 0.00107 | 2.51557  | 1.11089   | 0.43   | 0.19  | 44.19    |
| 34 | 0.387  | 229.8022 | 1.33742  | 1.14263  | 0.02377 | 0.78312  | 0.00679   | 100.6726 | 0.65849    | 2.09826  | 0.04369 | 0.02286  | 0.0007  | -1.54657 | 1.51411   | -0.27  | 0.26  | -96.30   |
| 35 | 0.397  | 30.87846 | 0.32405  | 5.14018  | 0.09193 | 0.08433  | 0.00541   | 79.4061  | 5.11489    | 9.46588  | 0.1699  | 0.02851  | 0.00118 | 6.37613  | 1.58556   | 1.1    | 0.27  | 24.55    |
| 36 | 0.4083 | 3.66814  | 0.06712  | 1.389    | 0.02474 | 0.00419  | 0.00306   | 30.9143  | 24.88703   | 2.55112  | 0.04549 | 0.00802  | 0.0009  | 2.51613  | 0.90846   | 0.43   | 0.16  | 37.21    |
| 37 | 0.4249 | 240.9083 | 1.36443  | 0.49196  | 0.02297 | 0.83427  | 0.00889   | 102.3284 | 0.95227    | 0.90299  | 0.04218 | 0.02039  | 0.00096 | -5.61048 | 2.29334   | -0.97  | 0.4   | -41.24   |
| 38 | 0.444  | 29.72109 | 0.22321  | 0.73221  | 0.0257  | 0.0926   | 0.00364   | 91.95614 | 3.56053    | 1.3442   | 0.0472  | 0.03004  | 0.00071 | 2.38957  | 1.05804   | 0.41   | 0.18  | 43.90    |
| 39 | 0.447  | 102.4133 | 2.85612  | 6.07937  | 0.26073 | 0.32535  | 0.02256   | 93.41176 | 5.96389    | 11.2029  | 0.48254 | 0.01471  | 0.00348 | 6.77437  | 6.13548   | 1.17   | 0.76  | 90.60    |
| 40 | 0.4515 | 49.22884 | 0.75403  | 6.32779  | 0.1741  | 0.13671  | 0.01428   | 81.0667  | 8.49035    | 11.49613 | 0.32229 | 0.01001  | 0.00183 | 9.35626  | 4.19854   | 1.62   | 0.72  | 44.44    |
| 41 | 0.4675 | 0.99475  | 0.02809  | 0.9568   | 0.04346 | -0.0011  | 0.0035    | -41.9485 | 107.3006   | 1.75678  | 0.07985 | 0.02588  | 0.00067 | 1.37083  | 1.03658   | 0.24   | 0.18  | 75.00    |
| 42 | 0.4806 | 315.2666 | 2.03349  | 0.97985  | 0.03207 | 1.06887  | 0.01247   | 100.1695 | 0.98692    | 1.79914  | 0.05892 | 0.02654  | 0.00113 | -0.53454 | 3.11321   | -0.09  | 0.54  | -600.00  |
| 43 | 0.4892 | 14.60373 | 0.1422   | 1.289    | 0.04358 | 0.03088  | 0.00598   | 61.87601 | 12.11737   | 2.36728  | 0.08011 | 0.00762  | 0.00074 | 5.56127  | 1.7689    | 0.96   | 0.31  | 32.29    |
| 44 | 0.4951 | 24.39725 | 0.61331  | 6.04675  | 0.16163 | 0.05741  | 0.00715   | 67.5682  | 8.49651    | 11.14253 | 0.29912 | 0.00883  | 0.0011  | 7.93677  | 2.08955   | 1.37   | 0.36  | 26.28    |
| 45 | 0.4962 | 284.6989 | 12.67459 | 12.73139 | 0.63989 | 0.96758  | 0.06465   | 100.0705 | 5.00728    | 23.57228 | 1.19551 | 0.02778  | 0.00538 | -0.20621 | 16.38353  | -0.04  | 2.49  | -6225.00 |
| 46 | 0.5119 | 7.66265  | 0.07904  | 0.70958  | 0.02577 | 0.01731  | 0.00227   | 66.24087 | 8.26257    | 1.30263  | 0.04734 | 0.02815  | 0.00065 | 2.57811  | 0.67163   | 0.45   | 0.12  | 26.67    |
| 47 | 0.5244 | 81.79484 | 0.66123  | 0.76178  | 0.03115 | 0.27278  | 0.00661   | 98.50571 | 7.26238    | 1.39851  | 0.05721 | 0.01218  | 0.00095 | 1.22247  | 1.85099   | 0.21   | 0.32  | 152.38   |
| 48 | 0.533  | 6.72184  | 0.06902  | 2.10661  | 0.06872 | 0.01373  | 0.0034    | 58.01194 | 15.02018   | 3.8711   | 0.12648 | 0.02318  | 0.00097 | 2.81411  | 1.00747   | 0.49   | 0.17  | 34.69    |
| 49 | 0.5404 | 3.42418  | 0.07423  | 0.92087  | 0.05793 | 0.00877  | 0.00623   | 74.13843 | 54.28192   | 1.69076  | 0.10644 | 0.03526  | 0.00187 | 0.87844  | 1.84428   | 0.15   | 0.32  | 213.33   |
| 50 | 0.5435 | 811.3771 | 20.04255 | 2.0528   | 0.11945 | 2.71905  | 0.07341   | 99.00953 | 1.08659    | 3.77207  | 0.21981 | 0.00589  | 0.0043  | 8.04777  | 8.83165   | 1.39   | 1.52  | 109.35   |
| 51 | 0.5457 | 9.79213  | 0.39547  | 3.27864  | 0.23557 | -0.00305 | 0.0173    | -12.0069 | 52.37083   | 6.02982  | 0.43425 | 0.02832  | 0.00583 | 10.96005 | 5.14279   | 1.89   | 0.89  | 47.09    |
| 52 | 0.5748 | 267.6293 | 1.02781  | 0.50706  | 0.01246 | 0.89008  | 0.00869   | 98.27229 | 0.8846     | 0.93073  | 0.02289 | 0.01306  | 0.00065 | 4.625    | 2.36822   | 0.8    | 0.41  | 51.25    |
| 53 | 0.5769 | 236.4379 | 8.44929  | 7.8332   | 0.34355 | 0.00343  | 0.9411737 | 2.65433  | 14.45279   | 0.6374   | 0.02197 | 0.00505  | 0.00505 | 13.9844  | 6.33134   | 2.41   | 1.09  | 45.23    |
| 54 | 0.5836 | 8.2958   | 0.13237  | 1.53387  | 0.05753 | 0.00771  | 0.00421   | 26.02061 | 15.06359   | 2.8175   | 0.10579 | 0.00693  | 0.0018  | 6.12187  | 1.251     | 1.06   | 0.22  | 20.75    |
| 55 | 0.5876 | 137.0967 | 2.20395  | 3.58266  | 0.10634 | 0.44569  | 0.01757   | 95.86951 | 3.46952    | 6.59036  | 0.19611 | 0.01538  | 0.00179 | 5.6759   | 4.76915   | 0.98   | 0.82  | 83.67    |
| 56 | 0.5919 | 9.00438  | 0.13354  | 2.30726  | 0.09197 | 0.01176  | 0.00719   | 36.61633 | 23.67923   | 4.24041  | 0.1693  | 0.01213  | 0.00178 | 5.6978   | 2.13102   | 0.98   | 0.37  | 37.76    |
| 57 | 0.5935 | 3.70056  | 0.23705  | 1.66105  | 0.21084 | -0.00316 | 0.0222    | -29.1853 | 178.7283   | 3.05137  | 0.38776 | 0.01496  | 0.00461 | 4.74783  | 6.57331   | 0.82   | 1.14  | 139.02   |
| 58 | 0.5983 | 14.81828 | 0.19435  | 4.64422  | 0.10778 | 0.02301  | 0.00605   | 43.79444 | 12.08114   | 8.54954  | 0.19906 | 0.00936  | 0.00137 | 8.39876  | 1.79706   | 1.45   | 0.31  | 21.38    |
| 59 | 0.6038 | 4.34737  | 0.0832   | 1.28668  | 0.08412 | 0.00613  | 0.00869   | 39.51554 | 59.49337   | 2.36303  | 0.15464 | 0.0254   | 0.00179 | 2.61391  | 2.57191   | 0.45   | 0.44  | 97.78    |
| 60 | 0.6071 | 66.90775 | 1.50056  | 3.6845   | 0.14363 | 0.19572  | 0.01083   | 86.02541 | 4.38347    | 6.77818  | 0.26492 | 0.0089   | 0.00264 | 9.37033  | 2.94759   | 1.62   | 0.51  | 31.48    |
| 61 | 0.6185 | 5.10348  | 0.05932  | 1.11682  | 0.03844 | 0.01191  | 0.00317   | 67.5217  | 18.47808</ |          |         |          |         |          |           |        |       |          |

|     |               |                 |                |                |                |                 |                |                 |                |                 |                |                |                |                 |                |             |             |              |
|-----|---------------|-----------------|----------------|----------------|----------------|-----------------|----------------|-----------------|----------------|-----------------|----------------|----------------|----------------|-----------------|----------------|-------------|-------------|--------------|
| 96  | 0.8006        | 33.33687        | 0.48861        | 1.13808        | 0.0997         | 0.1109          | 0.01167        | 98.1094         | 10.25446       | 2.08991         | 0.18323        | 0.03183        | 0.00192        | 0.63021         | 3.41828        | 0.11        | 0.59        | 536.36       |
| 97  | 0.8022        | 186.8882        | 5.70034        | 2.32162        | 0.2121         | 0.6084          | 0.028          | 96.11061        | 3.33271        | 4.26685         | 0.39045        | 0.00381        | 0.00327        | 7.27959         | 6.24292        | 1.26        | 1.08        | 85.71        |
| 98  | 0.804         | 8.67545         | 0.25621        | 1.98061        | 0.18216        | 0.00785         | 0.01971        | 24.95647        | 67.35733       | 3.63924         | 0.33518        | 0.01245        | 0.00324        | 6.49719         | 5.83621        | 1.12        | 1.01        | 90.18        |
| 99  | 0.8119        | 207.2517        | 2.10217        | 1.12502        | 0.04674        | 0.69896         | 0.01154        | 99.62679        | 1.31397        | 2.0659          | 0.0859         | 0.0273         | 0.00152        | 0.77398         | 2.72513        | 0.13        | 0.47        | 361.54       |
| 100 | <b>0.8131</b> | <b>21.79389</b> | <b>1.78732</b> | <b>9.20931</b> | <b>0.82351</b> | <b>-0.00495</b> | <b>0.03087</b> | <b>-10.2026</b> | <b>41.9063</b> | <b>17.00843</b> | <b>1.53088</b> | <b>0.009</b>   | <b>0.00601</b> | <b>24.14193</b> | <b>9.3942</b>  | <b>4.17</b> | <b>1.62</b> | <b>38.85</b> |
| 101 | 0.8213        | 530.2421        | 5.25731        | 0.71422        | 0.05421        | 1.7665          | 0.02943        | 98.44016        | 1.32712        | 1.31115         | 0.09956        | 0.03002        | 0.00166        | 8.27461         | 7.04134        | 1.43        | 1.22        | 85.31        |
| 102 | 0.824         | 17.5639         | 0.46797        | 2.48266        | 0.1507         | 0.0245          | 0.01341        | 40.11468        | 22.58329       | 4.56333         | 0.27749        | 0.01986        | 0.00186        | 10.51889        | 3.97755        | 1.82        | 0.69        | 37.91        |
| 103 | 0.8398        | 3.25994         | 0.03142        | 0.27484        | 0.01954        | 0.00394         | 0.00223        | 35.29634        | 20.39292       | 0.5044          | 0.03588        | 0.00038        | 0.00048        | 2.09049         | 0.65933        | 0.36        | 0.11        | 30.56        |
| 104 | 0.8485        | 590.1875        | 8.34453        | 1.8242         | 0.0474         | 1.96702         | 0.03391        | 98.4661         | 0.97632        | 3.35147         | 0.08719        | 0.04046        | 0.00149        | 9.06413         | 5.7711         | 1.57        | 1           | 63.69        |
| 105 | 0.8618        | 175.9842        | 1.6475         | 1.4053         | 0.03825        | 0.58491         | 0.01108        | 98.16441        | 1.62362        | 2.58109         | 0.07032        | 0.00477        | 0.00079        | 3.23301         | 2.86001        | 0.56        | 0.49        | 87.50        |
| 106 | 0.8642        | 58.2161         | 1.18038        | 1.76158        | 0.13548        | 0.19636         | 0.01526        | 99.47253        | 7.50233        | 3.23629         | 0.2492         | 0.01298        | 0.00339        | 0.3073          | 4.37086        | 0.05        | 0.76        | 1520.00      |
| 107 | 0.8658        | 46.86823        | 1.86317        | 4.36261        | 0.28593        | 0.15404         | 0.02518        | 96.41152        | 15.42325       | 8.02952         | 0.52789        | 0.02149        | 0.00527        | 1.68599         | 7.24693        | 0.29        | 1.25        | 431.03       |
| 108 | 0.8705        | 83.55934        | 1.58642        | 2.66124        | 0.12162        | 0.25112         | 0.00887        | 88.57633        | 2.6508         | 4.89221         | 0.224          | 0.02558        | 0.00269        | 9.56013         | 2.22641        | 1.65        | 0.38        | 23.03        |
| 109 | 0.8735        | 71.60414        | 1.24786        | 0.87803        | 0.13038        | 0.24166         | 0.01861        | 99.66984        | 7.48937        | 1.61206         | 0.23954        | 0.0173         | 0.00292        | 0.23646         | 5.36383        | 0.04        | 0.93        | 2325.00      |
| 110 | 0.8786        | 95.14333        | 1.44817        | 0.62125        | 0.07618        | 0.33003         | 0.01281        | 102.4799        | 3.68264        | 1.1404          | 0.1399         | 0.02469        | 0.00135        | -2.35974        | 3.5039         | -0.41       | 0.61        | -148.78      |
| 111 | 0.8906        | 362.8716        | 4.47439        | 0.65424        | 0.04079        | 1.22503         | 0.02494        | 99.75243        | 1.62901        | 1.201           | 0.07491        | 0.0276         | 0.00133        | 0.89872         | 5.91358        | 0.16        | 1.02        | 637.50       |
| 112 | 0.8989        | 34.50019        | 0.38405        | 0.69027        | 0.04751        | 0.087           | 0.0058         | 74.41214        | 4.90374        | 1.26718         | 0.08276        | 0.00564        | 0.00135        | 8.82457         | 1.69469        | 1.52        | 0.29        | 19.08        |
| 113 | <b>0.9087</b> | <b>20.77002</b> | <b>0.33647</b> | <b>0.88937</b> | <b>0.04472</b> | <b>0.02795</b>  | <b>0.00606</b> | <b>39.47296</b> | <b>8.60892</b> | <b>1.6329</b>   | <b>0.08216</b> | <b>0.00204</b> | <b>0.00082</b> | <b>12.5614</b>  | <b>1.7987</b>  | <b>2.17</b> | <b>0.31</b> | <b>14.29</b> |
| 114 | 0.9273        | 2.90585         | 0.03219        | 0.54075        | 0.02363        | 0.00338         | 0.00331        | 33.21726        | 33.99628       | 0.99259         | 0.04339        | 0.00147        | 0.00043        | 1.92151         | 0.97856        | 0.33        | 0.17        | 51.52        |
| 115 | <b>0.9435</b> | <b>18.54658</b> | <b>0.13684</b> | <b>0.56277</b> | <b>0.03263</b> | <b>0.02066</b>  | <b>0.00033</b> | <b>32.72484</b> | <b>4.7781</b>  | <b>1.03301</b>  | <b>0.05993</b> | <b>0.00089</b> | <b>0.00071</b> | <b>12.46222</b> | <b>0.89045</b> | <b>2.15</b> | <b>0.15</b> | <b>6.98</b>  |
| 116 | 0.9457        | 49.46729        | 1.20843        | 11.37002       | 0.32592        | 0.14028         | 0.01811        | 81.95185        | 10.64495       | 21.0313         | 0.60775        | 0.01487        | 0.0051         | 8.99484         | 5.31127        | 1.55        | 0.92        | 59.35        |
| 117 | 0.9582        | 22.40694        | 0.31047        | 0.37657        | 0.03707        | 0.04882         | 0.00276        | 64.32717        | 3.5425         | 0.69113         | 0.06806        | 0.001          | 0.0007         | 7.98472         | 0.80136        | 1.38        | 0.14        | 10.14        |
| 118 | 0.9625        | 163.6034        | 2.78165        | 1.90199        | 0.08601        | 0.52319         | 0.01308        | 94.41974        | 1.74592        | 3.49458         | 0.15824        | 0.01026        | 0.00187        | 9.14012         | 2.86518        | 1.58        | 0.49        | 31.01        |
| 119 | 0.9708        | 2.04427         | 0.04516        | 1.35981        | 0.05739        | 0.00937         | 0.00369        | 131.8818        | 54.11136       | 2.49747         | 0.1055         | 0.01038        | 0.00156        | -0.64291        | 1.09081        | -0.11       | 0.19        | -172.73      |
| 120 | 0.9974        | 25.97693        | 0.21222        | 0.69623        | 0.01956        | 0.07593         | 0.00177        | 86.24835        | 1.89492        | 1.27812         | 0.03593        | 0.0022         | 0.00037        | 3.56993         | 0.49302        | 0.62        | 0.09        | 14.52        |
| 121 | 1             | 808.905         | 10.90731       | 2.25061        | 0.12185        | 2.73229         | 0.05285        | 99.79353        | 1.39231        | 4.13613         | 0.22429        | 0.00437        | 0.00339        | 1.67272         | 11.28012       | 0.29        | 1.95        | 672.41       |

Integrated 94.10082 0.10045 1.69851 0.00511 0.30431 0.00087 95.44355 0.25402 3.12028 0.0094 0.01516 0.00012 4.29145 0.23935 0.74 0.04 5.41

#### CHETASLINA RIVER (500-1000 microns)

Weighted average of 1 from standards = 9.588e-05 +/- 4.822e-07

| Grain # | Cumulative 40Ar/39Ar +/- 39Ar | meas.    | 37Ar/39Ar +/- 39Ar | meas.   | 36Ar/39Ar +/- 39Ar | meas.   | % Atm. 40Ar +/- | Ca/K +/- | Cl/K +/- | 40*/39K +/- | Age (Ma) +/- | %error  |         |          |         |       |      |          |
|---------|-------------------------------|----------|--------------------|---------|--------------------|---------|-----------------|----------|----------|-------------|--------------|---------|---------|----------|---------|-------|------|----------|
| 1       | 0.0036                        | 32.90616 | 0.49411            | 4.35409 | 0.13223            | 0.10007 | 0.01175         | 88.85689 | 10.48246 | 8.0138      | 0.24412      | 0.0207  | 0.00194 | 3.67477  | 3.45758 | 0.63  | 0.6  | 95.24    |
| 2       | 0.0103                        | 244.3488 | 1.96842            | 0.94132 | 0.04651            | 0.82895 | 0.01384         | 100.2289 | 1.48982  | 1.72834     | 0.08546      | 0.02895 | 0.00137 | -0.55955 | 3.64221 | -0.1  | 0.63 | -630.00  |
| 3       | 0.0119                        | 151.7543 | 4.5559             | 1.95144 | 0.25211            | 0.50355 | 0.02692         | 97.96648 | 4.35227  | 3.58557     | 0.46386      | 0.0235  | 0.00538 | 3.0896   | 6.61374 | 0.53  | 1.14 | 215.09   |
| 4       | 0.0165                        | 99.66256 | 1.34753            | 3.54816 | 0.10033            | 0.33002 | 0.0096          | 97.58641 | 2.54694  | 6.52674     | 0.18502      | 0.01657 | 0.00156 | 2.41077  | 2.54482 | 0.42  | 0.44 | 104.76   |
| 5       | 0.0316                        | 336.6985 | 2.89872            | 0.507   | 0.02977            | 1.13478 | 0.01676         | 99.58891 | 1.20137  | 0.93061     | 0.05465      | 0.0223  | 0.0009  | 1.38452  | 4.04618 | 0.24  | 0.7  | 291.67   |
| 6       | 0.0333                        | 868.1095 | 31.30265           | 4.69228 | 0.26627            | 2.82074 | 0.1049          | 95.97526 | 0.91125  | 8.63832     | 0.49183      | 0.05113 | 0.00421 | 35.05415 | 8.05062 | 6.05  | 1.39 | 22.98    |
| 7       | 0.0471                        | 156.4486 | 0.63548            | 1.36087 | 0.04172            | 0.5197  | 0.00905         | 98.10748 | 1.66612  | 2.49941     | 0.0767       | 0.00813 | 0.00103 | 2.96311  | 2.60878 | 0.51  | 0.45 | 88.24    |
| 8       | 0.058                         | 69.67116 | 0.67265            | 1.09845 | 0.04681            | 0.23557 | 0.00713         | 99.82617 | 2.88159  | 2.01706     | 0.08603      | 0.04081 | 0.00125 | 0.12115  | 2.00836 | 0.02  | 0.35 | 1750.00  |
| 9       | 0.0761                        | 122.9938 | 0.15568            | 0.60199 | 0.02486            | 0.41892 | 0.00417         | 100.6312 | 0.53641  | 1.10505     | 0.04565      | 0.02309 | 0.00031 | -0.77652 | 0.65969 | -0.13 | 0.11 | -84.62   |
| 10      | 0.102                         | 177.3921 | 1.07397            | 0.87591 | 0.02999            | 0.59444 | 0.0067          | 98.99766 | 0.94852  | 1.60816     | 0.0551       | 0.03019 | 0.00076 | 1.77887  | 1.68354 | 0.31  | 0.29 | 93.55    |
| 11      | 0.1053                        | 94.33246 | 1.15292            | 4.22344 | 0.12748            | 0.29935 | 0.01297         | 93.43322 | 3.90624  | 7.77262     | 0.23531      | 0.02614 | 0.00179 | 6.21119  | 3.69603 | 1.07  | 0.64 | 59.81    |
| 12      | 0.112                         | 445.8906 | 4.16952            | 6.32171 | 0.08007            | 1.47075 | 0.02018         | 97.3592  | 0.98951  | 11.65148    | 0.14824      | 0.0329  | 0.00192 | 11.82711 | 4.43434 | 2.04  | 0.77 | 37.75    |
| 13      | 0.1217                        | 15.99349 | 0.22111            | 1.25413 | 0.03851            | 0.0548  | 0.00434         | 100.7979 | 7.92194  | 2.3032      | 0.07079      | 0.02673 | 0.00076 | -0.12748 | 1.26575 | -0.02 | 0.22 | -1100.00 |
| 14      | 0.1369                        | 342.6902 | 3.76986            | 0.92882 | 0.03397            | 1.15742 | 0.01702         | 99.78995 | 0.98073  | 1.70537     | 0.0624       | 0.02974 | 0.00098 | 0.72023  | 3.36283 | 0.12  | 0.58 | 483.33   |
| 15      | 0.1475                        | 16.67196 | 0.21358            | 1.90128 | 0.0399             | 0.03547 | 0.00412         | 62.03027 | 7.28013  | 3.49327     | 0.07341      | 0.01613 | 0.00079 | 6.32753  | 1.21633 | 1.09  | 0.21 | 19.27    |
| 16      | 0.1631                        | 0.12561  | 0.02026            | 1.01455 | 0.03278            | 0.00396 | 0.00337         | 1132.139 | 1064.602 | 1.86289     | 0.06023      | 0.02042 | 0.0005  | -0.99084 | 0.99621 | -0.17 | 0.17 | -100.00  |
| 17      | 0.1742                        | 77.88549 | 0.88816            | 2.09303 | 0.03793            | 0.24751 | 0.00509         | 93.72002 | 1.61885  | 3.8461      | 0.0698       | 0.01401 | 0.00068 | 4.89657  | 1.26411 | 0.85  | 0.22 | 25.88    |
| 18      | 0.1911                        | 52.83003 | 0.57381            | 1.02166 | 0.03104            | 0.17654 | 0.00424         | 98.64127 | 2.12432  | 1.87596     | 0.05704      | 0.03845 | 0.00064 | 0.71793  | 1.12257 | 0.12  | 0.19 | 158.33   |
| 19      | 0.1985                        | 13.40144 | 0.16912            | 1.94144 | 0.08056            | 0.04812 | 0.00475         | 105.1321 | 10.44419 | 3.56717     | 0.14823      | 0.01489 | 0.00146 | -0.68719 | 1.3983  | -0.12 | 0.24 | -200.00  |
| 20      | 0.2244                        | 52.19354 | 0.27319            | 0.52179 | 0.01982            | 0.16713 | 0.00284         | 94.5967  | 1.54661  | 0.95776     | 0.03639      | 0.01021 | 0.00053 | 2.81961  | 0.80773 | 0.49  | 0.14 | 28.57    |
| 21      | 0.2416                        | 2.36475  | 0.03358            | 0.87109 | 0.02408            | 0.00677 | 0.00203         | 82.59509 | 25.62882 | 1.59931     | 0.04423      | 0.00731 | 0.00054 | 0.40667  | 0.59896 | 0.07  | 0.1  | 142.86   |
| 22      | 0.2545                        | 288.5778 | 3.11377            | 1.14116 | 0.03195            | 0.98177 | 0.01612         | 100.5098 | 1.25276  | 2.09556     | 0.05871      | 0.0261  | 0.00119 | -1.47217 | 3.61764 | -0.25 | 0.63 | -252.00  |
| 23      | 0.2677                        | 5.51612  | 0.06528            | 1.21544 | 0.0483             | 0.01678 | 0.00289         | 88.57631 | 15.55258 | 2.23208     | 0.08878      | 0.03102 | 0.00139 | 0.62729  | 0.85418 | 0.11  | 0.15 | 136.36   |
| 24      | 0.2736                        | 208.2725 | 2.76955            | 1.40699 | 0.09264            | 0.67661 | 0.01218         | 95.95643 | 1.1821   | 2.5842      | 0.17033      | 0.02072 | 0.00182 | 8.42881  | 2.46824 | 1.46  | 0.43 | 29.45    |
| 25      | 0.2849                        | 238.3495 | 1.91208            | 1.27344 | 0.04551            | 0.81227 | 0.01232         | 100.6721 | 1.305    | 2.33869     | 0.08366      | 0.02535 | 0.00092 | -1.60314 | 3.11278 | -0.28 | 0.54 | -192.86  |
| 26      | 0.2971                        | 10.62506 | 0.07527            | 0.963   | 0.0357             | 0.03588 | 0.00311         | 99.32733 | 8.64955  | 1.76817     | 0.0656       | 0.03278 | 0.00092 | 0.07132  | 0.91709 | 0.01  | 0.16 | 1600.00  |
| 27      | 0.3103                        | 91.59397 | 0.85053            | 0.78407 | 0.02599            | 0.29541 | 0.00466         | 95.26428 | 1.24237  | 1.43946     | 0.04775      | 0.02189 | 0.00079 | 4.33863  | 1.14007 | 0.75  | 0.2  | 26.67    |
| 28      | 0.3206                        | 39.38271 | 0.5239             | 0.34315 | 0.03138            | 0.13512 | 0.00397         | 101.387  | 2.67845  | 0.62978     | 0.05761      | 0.02484 | 0.00102 | -0.54596 | 1.05423 | -0.09 | 0.18 | -200.00  |
| 29      | 0.3302                        | 346.4168 | 4.05879            | 1.58112 | 0.05749            | 1.17053 | 0.02009         | 99.81895 | 1.26107  | 2.90438     | 0.10572      | 0.02751 | 0.00117 | 0.62783  | 4.37313 | 0.11  | 0.76 | 690.91   |
| 30      | 0.3377                        | 1.15575  | 0.06451            | 0.08636 | 0.04512            | 0.01056 | 0.00479         | 269.0444 | 126.4898 | 1.99485     | 0.08291      | 0.03056 | 0.001   | -1.90502 | 1.41653 | -0.33 | 0.24 | -72.73   |
| 31      | 0.3535                        | 2.40819  | 0.03456            | 0.44621 | 0.02969            | 0.00366 | 0.00237         | 43.97105 | 29.47146 | 0.81899     | 0.05451      | 0.00644 | 0.00068 | 1.33307  | 0.70172 | 0.23  | 0.12 | 52.17    |
| 32      | 0.361                         | 4.2378   | 0.06486            | 1.0855  | 0.05167            | 0.02351 | 0.00488         | 163.1758 | 34.25143 | 1.99327     | 0.09496      | 0.02556 | 0.00125 | -2.66055 | 1.4413  | -0.46 | 0.25 | -54.35   |
| 33      | 0.3762                        | 23.08388 | 0.20444            | 0.7979  | 0.02956            | 0.06054 | 0.00276         | 77.27048 | 3.4866   | 1.46382     | 0.0543       | 0.02154 | 0.00079 | 5.24306  | 0.80637 | 0.91  | 0.14 | 15.38    |
| 34      | 0.3868                        | 27.24953 | 0.24395            | 1.10909 | 0.0363             | 0.09367 | 0.0057          | 101.354  | 6.12869  | 2.03662     | 0.06671      | 0.01769 | 0.001   | -0.36886 | 1.66951 | -0.06 | 0.29 | -483.33  |
| 35      | 0.3918                        | 26.47198 | 0.37768            | 0.87021 | 0.06757            | 0.07571 | 0.00783         | 84.33739 | 8.67959  | 1.5977      | 0.12413      | 0.01794 | 0.00195 | 4.1441   | 2.29765 | 0.72  | 0.4  | 55.56    |
| 36      | 0.403                         | 165.8196 | 0.98341            | 0.80431 | 0.04745            | 0.56089 | 0.01058         | 99.93227 | 1.80091  | 1.47663     | 0.08716      | 0.02959 | 0.00126 | 0.11235  | 2.98744 | 0.02  | 0.52 | 2600.00  |
| 37      | 0.4059                        | 22.15951 | 0.52054            | 3.05228 | 0.16403            | 0.02792 | 0.01584         | 36.14423 | 21.14047 | 5.61262     | 0.30227      | 0.01883 | 0.00276 | 14.16173 | 4.70135 | 2.45  | 0.81 | 33.06    |
| 38      | 0.4202                        | 110.4933 | 0.78976            | 0.42396 | 0.01823            | 0.35883 | 0.00795         | 95.95899 | 2.02441  | 0.78114     | 0.03347      | 0.03062 | 0.0007  | 4.46418  | 2.23532 | 0.77  | 0.39 | 50.65    |
| 39      | 0.4228                        | 3.64912  | 0.1412             | 1.54134 | 0.15229            | 0.01329 | 0.01462         | 104.9723 | 119.3762 | 2.83123     | 0.28005      | 0.02846 | 0.00332 | -0.18017 | 4.32533 | -0.03 | 0.75 | -2500.00 |
| 40      | 0.4299                        | 127.7167 | 1.84513            | 0.86245 | 0.04259            | 0.44737 | 0.01311         | 102.6496 | 2.65783  | 1.58345     | 0.07824      | 0.02918 | 0.0014  | -3.3853  | 3.39576 | -0.58 | 0.59 | -101.72  |
| 41      | 0.4368                        | 18.58986 | 0.32727            | 0.98822 | 0.04302            | 0.06049 | 0.00585         | 96.86252 | 9.15882  | 1.81451     | 0.07904      | 0.03224 | 0.00197 | 0.76846  | 1.70121 | 0.29  | 0.29 | 223.08   |
| 42      | 0.442                         | 3.42219  | 0.08034            | 1.84312 | 0.06512            | 0.01615 | 0.00804         | 136.1869 | 69.98248 | 3.38628     | 0.1198       | 0.01548 | 0.0014  | -1.22925 | 2.37707 | -0.41 | 0.41 | -195.24  |
| 43      | 0.4461                        | 2.10931  | 0.09009            | 1.03559 | 0.09341            | 0.01592 | 0.0095          | 222.0474 | 135.2929 | 1.90155     | 0.17164      | 0.02683 | 0.00235 | -2.54    | 2.81102 | -0.24 | 0.49 | -111.36  |
| 44      | 0.4518                        | 19.18275 | 0.24011            | 1.4713  | 0.07253            | 0.04843 | 0.00718         | 74.08306 | 11.04164 | 2.70244     | 0.13336      | 0.00689 | 0.0015  | 4.96905  | 2.11814 | 0.86  | 0.37 | 43.02    |
| 45      | 0.4592                        | 3.80968  | 0.05297            | 0.83348 | 0.06214            | 0.00622 | 0.00434         | 46.77318 | 33.95806 | 1.53022     | 0.11415      | 0.01998 | 0.00179 | 2.01316  | 1.28509 | 0.35  | 0.22 | 62.86    |
| 46      | 0.4605                        | 412.2788 | 11.31107           | 1.48553 | 0.38916            | 1.39113 | 0.05105         | 99.66818 | 2.44026  | 2.72861     | 0.71556      | 0.04865 | 0.00962 | 1.29509  | 10.0782 | 0.22  | 1.74 | 790.91   |
| 47      | 0.4633                        | 8.20854  | 0.15132            | 1.3458  | 0.12983            | 0.04154 | 0.01039         | 148.7159 | 37.50558 | 2.47171     | 0.23867      | 0.02993 | 0.00263 | -3.98819 | 3.06946 | -0.69 | 0.53 | -76.81   |
| 48      | 0.4648                        | 215.234  | 8.9508             | 4.30509 | 0.34127            | 0.72121 | 0.04482         | 98.86562 | 4.58056  | 7.92334     | 0.63001      | 0.00704 | 0.00506 | 2.44867  | 9.88839 | 0.42  | 0.71 | 407.14   |
| 49      | 0.4694                        | 39.51794 | 0.71322            | 0.88601 | 0.06868            | 0.11932 | 0.00758         | 89.10456 | 5.44337  | 1.62672     | 0.12617      | 0.00438 | 0.00183 | 4.30511  | 2.15259 | 0.74  | 1.31 | 50.14    |
| 50      | 0.4759                        | 130.7022 | 1.26707            | 0.45758 | 0.05524            | 0.42408 | 0.01022         | 95.87246 | 2.12428  | 0.83987     | 0.10142      | 0.02401 | 0.00145 | 5.3953   | 2.77775 | 0.93  | 0.48 | 51.61    |
| 51      | 0.4797                        | 4.13474  | 0.1415             | 0.85017 | 0.08773            | 0.00772 | 0.00573         | 53.85611 | 41.27449 | 1.56089     | 0.16116      | 0.01702 | 0.00209 | 1.89537  | 1.69845 | 0.33  | 0.29 | 87.88    |
| 52      | 0.4878                        | 0.74956  | 0.05006            | 0.87385 | 0.04227            | 0.00015 | 0.00348         | -3.9053  | 143.0202 | 1.60439     | 0.07765      | 0.02281 | 0.00128 | 0.74845  | 1.03142 | 0.13  | 0.18 | 138.46   |
| 53      | 0.4918                        | 49.47335 | 0.7448             | 1.25153 | 0.092              | 0.14366 | 0.01102         | 85.65134 | 6.46929  | 2.29842     | 0.16911      | 0.01863 | 0.00189 | 7.10078  | 3.20421 | 1.23  | 0.55 | 44.72    |
| 54      | 0.4966                        | 247.5232 | 3.07573            | 1.33045 | 0.0659             | 0.83199 | 0.01415         | 99.2929  | 1.17238  | 2.44349     | 0.12115      | 0.02103 | 0.00205 | 1.75167  | 2.9047  | 0.3   | 0.5  | 166.67   |
| 55      | 0.501                         | 113.6038 | 0.87812            | 0.91195 | 0.06184            | 0.3699  | 0.00924         | 96.17477 | 2.29547  | 1.67438     | 0.11361      | 0.02461 | 0.00221 | 4.34728  | 2.60944 | 0.75  | 0.45 | 60.00    |
| 56      | 0.5043                        | 2.71429  | 0.1051             | 0.81957 | 0.14018            | 0.00334 | 0.00734         | 34.24714 | 80.85469 | 1.50466     | 0.25751      | 0.03302 | 0.00218 | 1.76623  | 2.17403 | 0.31  |      |          |

|     |               |                 |                |                |                |                |                |                 |                 |                |                |                |                |                 |                |              |             |               |
|-----|---------------|-----------------|----------------|----------------|----------------|----------------|----------------|-----------------|-----------------|----------------|----------------|----------------|----------------|-----------------|----------------|--------------|-------------|---------------|
| 58  | 0.5133        | 7.45352         | 0.14604        | 0.70768        | 0.08049        | 0.01706        | 0.00988        | 67.11325        | 39.29925        | 1.29915        | 0.14784        | 0.02914        | 0.00153        | 2.44268         | 2.91985        | 0.42         | 0.5         | 119.05        |
| 59  | 0.5155        | 18.73042        | 0.39451        | 1.79795        | 0.14578        | 0.05854        | 0.01456        | 91.70909        | 22.95534        | 3.30319        | 0.26816        | 0.01599        | 0.00303        | 1.55243         | 4.29884        | 0.27         | 0.74        | 274.07        |
| 60  | 0.5255        | 3.99574         | 0.05596        | 0.31816        | 0.03909        | 0.0071         | 0.00486        | 52.27568        | 36.17318        | 0.58392        | 0.07176        | 0.02254        | 0.00099        | 1.89319         | 1.43549        | 0.33         | 0.25        | 75.76         |
| 61  | 0.5277        | 19.25655        | 0.60414        | 1.1808         | 0.02984        | 0.01438        | 0.02984        | 45.34865        | 22.0629         | 2.16842        | 0.30315        | 0.01038        | 0.00263        | 10.51651        | 4.2606         | 1.82         | 0.74        | 40.66         |
| 62  | 0.5327        | 2.04257         | 0.0636         | 0.6494         | 0.07983        | -0.0006        | 0.006          | -11.4268        | 88.0391         | 1.19211        | 0.1466         | 0.03173        | 0.00206        | 2.24392         | 1.77412        | 0.39         | 0.31        | 79.49         |
| 63  | 0.5366        | 7.18357         | 0.13662        | 0.80027        | 0.14646        | 0.0119         | 0.01706        | 48.23867        | 70.47636        | 1.46922        | 0.26904        | 0.00448        | 0.00201        | 3.70504         | 5.04536        | 0.64         | 0.87        | 135.94        |
| 64  | <b>0.5398</b> | <b>57.4713</b>  | <b>1.08425</b> | <b>1.05746</b> | <b>0.11878</b> | <b>0.14092</b> | <b>0.01163</b> | <b>72.34053</b> | <b>5.8275</b>   | <b>1.94175</b> | <b>0.21826</b> | <b>0.00466</b> | <b>0.00231</b> | <b>15.89992</b> | <b>3.36391</b> | <b>2.75</b>  | <b>0.58</b> | <b>21.09</b>  |
| 65  | 0.5459        | 56.67684        | 0.83754        | 0.66475        | 0.06187        | 0.18876        | 0.00935        | 98.37213        | 4.66251         | 1.2203         | 0.11362        | 0.01871        | 0.0011         | 0.92257         | 2.64253        | 0.16         | 0.46        | 287.50        |
| 66  | 0.5533        | 10.85953        | 0.10199        | 0.42771        | 0.05967        | 0.01799        | 0.00504        | 48.77354        | 13.74303        | 0.78502        | 0.10955        | 0.02421        | 0.00122        | 5.54942         | 1.49014        | 0.96         | 0.26        | 27.05         |
| 67  | 0.5575        | 15.30513        | 0.3077         | 1.78406        | 0.12563        | 0.02514        | 0.01213        | 47.67897        | 23.44127        | 3.27763        | 0.23109        | 0.00676        | 0.00178        | 8.00237         | 3.58956        | 1.38         | 0.62        | 44.93         |
| 68  | 0.5663        | 10.32887        | 0.12353        | 0.68514        | 0.04586        | 0.02532        | 0.00382        | 72.11123        | 10.94831        | 1.25775        | 0.08423        | 0.0171         | 0.00091        | 2.87371         | 1.12929        | 0.5          | 0.2         | 40.00         |
| 69  | 0.5711        | 59.65426        | 0.58563        | 0.97831        | 0.09162        | 0.20559        | 0.00811        | 101.7547        | 3.9121          | 1.79631        | 0.16835        | 0.02898        | 0.00106        | -1.04692        | 2.33405        | -0.18        | 0.4         | -222.22       |
| 70  | 0.5737        | 70.65781        | 1.3528         | 1.08505        | 0.16324        | 0.24267        | 0.00959        | 101.4055        | 3.53725         | 1.99245        | 0.29998        | 0.02341        | 0.00254        | -0.99341        | 2.50005        | -0.17        | 0.43        | -252.94       |
| 71  | 0.5811        | 8.91559         | 0.08385        | 0.45009        | 0.05137        | 0.01759        | 0.00354        | 58.09271        | 11.76361        | 0.82611        | 0.09431        | 0.00572        | 0.0014         | 3.72503         | 1.04688        | 0.64         | 0.18        | 28.13         |
| 72  | 0.5846        | 196.1169        | 3.30873        | 0.98747        | 0.12515        | 0.64886        | 0.01555        | 97.74064        | 1.6759          | 1.81314        | 0.22996        | 0.03117        | 0.00201        | 4.43342         | 3.28995        | 0.77         | 0.57        | 74.03         |
| 73  | 0.5899        | 55.75598        | 0.95749        | 0.85104        | 0.0353         | 0.17664        | 0.00796        | 93.53999        | 3.91392         | 1.56248        | 0.06485        | 0.02144        | 0.00102        | 3.60209         | 2.18363        | 0.62         | 0.38        | 61.29         |
| 74  | 0.6127        | 14.07381        | 0.09702        | 0.24846        | 0.0131         | 0.03633        | 0.00176        | 76.28778        | 3.68186         | 0.45597        | 0.02405        | 0.02631        | 0.00034        | 0.33076         | 0.5182         | 0.58         | 0.09        | 15.52         |
| 75  | 0.6168        | 177.3891        | 3.49908        | 2.46051        | 0.08513        | 0.59037        | 0.02017        | 98.24846        | 2.76106         | 4.52256        | 0.15675        | 0.01575        | 0.0017         | 3.11194         | 4.90645        | 0.54         | 0.85        | 157.41        |
| 76  | 0.6249        | 61.56158        | 0.4419         | 0.30259        | 0.03874        | 0.2123         | 0.00905        | 101.9161        | 4.29001         | 0.55533        | 0.07112        | 0.0076         | 0.00119        | -1.17925        | 2.64025        | -0.2         | 0.46        | -230.00       |
| 77  | 0.6282        | 30.36937        | 0.55114        | 2.06745        | 0.12151        | 0.08534        | 0.00967        | 82.55361        | 9.31897         | 3.79904        | 0.22361        | 0.00138        | 0.00151        | 5.30092         | 2.83488        | 0.92         | 0.49        | 53.26         |
| 78  | 0.6295        | 477.8684        | 16.50128       | 9.96957        | 0.40928        | 1.5983         | 0.0766         | 98.66815        | 3.29206         | 18.42249       | 0.76166        | 0.01519        | 0.00528        | 6.40921         | 15.84435       | 1.11         | 2.74        | 246.85        |
| 79  | 0.6429        | 5.13379         | 0.06844        | 0.45791        | 0.02765        | 0.01089        | 0.00384        | 62.30381        | 22.21237        | 0.84047        | 0.05076        | 0.01124        | 0.00066        | 1.92467         | 1.13466        | 0.33         | 0.2         | 60.61         |
| 80  | 0.648         | 110.9359        | 1.72557        | 1.28816        | 0.07502        | 0.36436        | 0.01376        | 96.98363        | 3.34604         | 2.36575        | 0.13791        | 0.03095        | 0.00278        | 3.34838         | 3.71494        | 0.58         | 0.64        | 110.34        |
| 81  | 0.6529        | 47.06815        | 1.00471        | 1.28374        | 0.09252        | 0.15987        | 0.00941        | 100.2084        | 5.5137          | 2.35763        | 0.17007        | 0.03306        | 0.00181        | -0.09811        | 2.59592        | -0.02        | 0.45        | -2250.00      |
| 82  | 0.654         | 229.2258        | 9.56071        | 1.8993         | 0.50571        | 0.77102        | 0.06063        | 99.33882        | 6.63514         | 3.48964        | 0.93041        | 0.0275         | 0.00678        | 1.51744         | 15.22823       | 0.26         | 2.63        | 1011.54       |
| 83  | 0.6598        | 30.51194        | 0.42361        | 0.93344        | 0.08194        | 0.10067        | 0.00801        | 97.33526        | 7.65676         | 1.71387        | 0.15055        | 0.02998        | 0.00145        | 0.81281         | 2.33559        | 0.14         | 0.4         | 285.71        |
| 84  | 0.6676        | 307.9434        | 2.9516         | 0.64912        | 0.05676        | 1.04368        | 0.01704        | 100.1434        | 1.33239         | 1.1916         | 0.10424        | 0.02269        | 0.00128        | -0.44187        | 4.10445        | -0.08        | 0.71        | -887.50       |
| 85  | 0.6713        | 2.59932         | 0.07005        | 1.07348        | 0.05926        | 0.00936        | 0.00714        | 104.1596        | 82.10052        | 1.97118        | 0.10889        | 0.03032        | 0.00234        | -0.10697        | 2.11121        | -0.02        | 0.36        | -1800.00      |
| 86  | 0.6753        | 43.91416        | 0.36346        | 3.05123        | 0.11648        | 0.12936        | 0.00987        | 86.53286        | 6.60711         | 5.61067        | 0.21465        | 0.00769        | 0.00114        | 5.92275         | 2.90643        | 1.02         | 0.5         | 49.02         |
| 87  | 0.6808        | 44.55723        | 0.54762        | 0.98423        | 0.05464        | 0.139          | 0.0274         | 92.05997        | 4.69347         | 1.80718        | 0.1004         | 0.00897        | 0.00142        | 3.53796         | 2.09262        | 0.61         | 0.36        | 59.02         |
| 88  | 0.6828        | 282.2881        | 9.05503        | 0.76148        | 0.10792        | 0.96176        | 0.04643        | 100.6661        | 3.64957         | 1.39797        | 0.19824        | 0.0301         | 0.00454        | -1.88124        | 10.30661       | -0.33        | 1.78        | -539.39       |
| 89  | 0.6928        | 36.03208        | 0.4266         | 0.91214        | 0.02995        | 0.11766        | 0.00347        | 96.36493        | 2.62932         | 1.67473        | 0.05502        | 0.02344        | 0.00102        | 1.30956         | 0.94766        | 0.23         | 0.16        | 69.57         |
| 90  | 0.6988        | 337.8144        | 3.86977        | 0.75772        | 0.05433        | 1.13232        | 0.01969        | 99.03863        | 1.30278         | 1.39106        | 0.09979        | 0.03302        | 0.00229        | 3.24912         | 4.40333        | 0.56         | 0.76        | 135.71        |
| 91  | 0.7265        | 59.02291        | 0.23997        | 0.83986        | 0.01626        | 0.19074        | 0.00362        | 95.42288        | 1.77673         | 1.54193        | 0.02987        | 0.00281        | 0.00047        | 2.70179         | 1.04901        | 0.47         | 0.18        | 38.30         |
| 92  | 0.7337        | 227.856         | 1.98324        | 0.94405        | 0.06649        | 0.75509        | 0.01505        | 97.9041         | 1.76046         | 1.73336        | 0.12216        | 0.00912        | 0.00195        | 4.7782          | 0.01388        | 0.83         | 0.69        | 83.13         |
| 93  | <b>0.7363</b> | <b>22.14917</b> | <b>0.42339</b> | <b>0.75937</b> | <b>0.10949</b> | <b>0.0288</b>  | <b>0.03318</b> | <b>38.19071</b> | <b>44.32093</b> | <b>1.39409</b> | <b>0.20111</b> | <b>0.00114</b> | <b>0.0017</b>  | <b>13.67923</b> | <b>9.81266</b> | <b>2.36</b>  | <b>1.69</b> | <b>71.61</b>  |
| 94  | 0.7421        | 17.64303        | 0.21635        | 0.85182        | 0.06092        | 0.03975        | 0.01414        | 66.29657        | 23.71835        | 1.56392        | 0.11914        | 0.00784        | 0.001          | 5.93988         | 4.18094        | 1.03         | 0.72        | 69.90         |
| 95  | 0.748         | 171.7739        | 1.892          | 0.67155        | 0.05431        | 0.55118        | 0.01694        | 94.80227        | 2.72852         | 1.23278        | 0.00974        | 0.02038        | 0.0018         | 8.93104         | 4.69008        | 1.54         | 0.81        | 52.60         |
| 96  | 0.7505        | 33.07486        | 0.87319        | 1.15207        | 0.12948        | 0.07988        | 0.03521        | 71.14156        | 31.43605        | 2.11561        | 0.23796        | 0.03172        | 0.00211        | 9.54409         | 10.40002       | 1.65         | 1.8         | 109.09        |
| 97  | 0.7566        | 22.13324        | 0.31298        | 0.53242        | 0.05868        | 0.07069        | 0.00564        | 94.302          | 7.43431         | 0.97729        | 0.10775        | 0.00547        | 0.00097        | 1.25993         | 1.64418        | 0.22         | 0.28        | 127.27        |
| 98  | 0.7576        | 36.09522        | 1.57342        | 1.2458         | 0.39807        | 0.10066        | 0.03821        | 82.19152        | 31.11437        | 2.28788        | 0.73169        | 0.02261        | 0.00402        | 6.28338         | 2.74612        | 1.11         | 1.94        | 174.77        |
| 99  | 0.7615        | 342.0806        | 7.05701        | 0.89377        | 0.09805        | 1.15007        | 0.02806        | 99.33355        | 1.31498         | 1.64099        | 0.18013        | 0.00832        | 0.00262        | 2.28104         | 4.50147        | 0.39         | 0.78        | 200.00        |
| 100 | 0.7706        | 76.61095        | 0.51369        | 0.83654        | 0.02615        | 0.26179        | 0.00608        | 100.9272        | 2.256           | 1.53585        | 0.04805        | 0.03104        | 0.00122        | -0.71045        | 1.72864        | -0.12        | 0.3         | -250.00       |
| 101 | 0.7778        | 21.92532        | 0.22353        | 0.76646        | 0.03312        | 0.06452        | 0.00546        | 86.78223        | 7.32182         | 1.40711        | 0.06083        | 0.00702        | 0.0009         | 2.89568         | 1.60452        | 0.5          | 0.28        | 56.00         |
| 102 | 0.7842        | 4.40287         | 0.07648        | 1.22531        | 0.11542        | 0.018          | 0.00575        | 119.3404        | 38.83924        | 2.25023        | 0.21216        | 0.02585        | 0.00112        | -0.84653        | 1.69964        | -0.15        | 0.29        | -193.33       |
| 103 | 0.7929        | 16.04694        | 0.17765        | 0.86953        | 0.05625        | 0.03139        | 0.00371        | 57.46486        | 5.68574         | 1.59644        | 0.10334        | -0.00181       | 0.00109        | 6.81715         | 0.91502        | 1.18         | 0.16        | 13.56         |
| 104 | 0.8018        | 201.5736        | 2.37976        | 0.20713        | 0.07714        | 0.68189        | 0.0116         | 99.895          | 1.25119         | 3.72484        | 0.14195        | 0.00085        | 0.00146        | 0.21192         | 2.52537        | 0.04         | 0.44        | 1100.00       |
| 105 | 0.8032        | 35.67647        | 1.31501        | 3.1988         | 0.24329        | 0.08776        | 0.0216         | 72.0075         | 17.73437        | 5.88265        | 0.44842        | -0.0117        | 0.00695        | 10.00103        | 6.35066        | 1.73         | 1.1         | 63.58         |
| 106 | 0.807         | 216.1477        | 3.5094         | 1.407          | 0.10936        | 0.69627        | 0.01442        | 95.14801        | 1.26488         | 2.58421        | 0.20106        | 0.0006         | 0.00345        | 10.49645        | 2.74612        | 1.81         | 0.47        | 25.97         |
| 107 | 0.8201        | 324.0396        | 2.74539        | 1.55704        | 0.0314         | 1.06895        | 0.01481        | 97.45002        | 1.07724         | 2.86011        | 0.05775        | 0.00518        | 0.0013         | 8.27128         | 3.49565        | 1.43         | 0.6         | 41.96         |
| 108 | <b>0.8255</b> | <b>18.56645</b> | <b>0.3044</b>  | <b>1.42467</b> | <b>0.09824</b> | <b>0.01184</b> | <b>0.00491</b> | <b>18.23829</b> | <b>18.1899</b>  | <b>2.61671</b> | <b>0.18062</b> | <b>-0.0025</b> | <b>0.00174</b> | <b>15.17126</b> | <b>14.7316</b> | <b>2.62</b>  | <b>0.25</b> | <b>9.54</b>   |
| 109 | 0.8373        | 69.23061        | 0.45222        | 0.83022        | 0.03209        | 0.23876        | 0.006          | 101.8575        | 2.48789         | 1.52423        | 0.05895        | 0.02517        | 0.00059        | -1.28618        | 1.72248        | -0.22        | 0.3         | -136.36       |
| 110 | 0.8487        | 125.6143        | 0.77998        | 1.61667        | 0.03098        | 0.41463        | 0.00736        | 97.4572         | 1.64635         | 2.96976        | 0.05698        | 0.02308        | 0.001          | 3.19702         | 2.07084        | 0.55         | 0.36        | 65.45         |
| 111 | <b>0.8543</b> | <b>72.4711</b>  | <b>0.70202</b> | <b>0.77452</b> | <b>0.04893</b> | <b>0.26169</b> | <b>0.00854</b> | <b>106.6591</b> | <b>3.33534</b>  | <b>1.42192</b> | <b>0.08988</b> | <b>0.02154</b> | <b>0.00174</b> | <b>-4.82657</b> | <b>2.4175</b>  | <b>-0.83</b> | <b>0.42</b> | <b>-50.60</b> |
| 112 | 0.8684        | 95.90279        | 0.67569        | 1.5266         | 0.02739        | 0.32137        | 0.00485        | 98.9202         | 1.33825         | 2.80413        | 0.05037        | 0.01139        | 0.00065        | 1.036           |                |              |             |               |

|    |        |          |          |         |         |         |          |          |          |          |         |         |          |          |          |        |       |          |
|----|--------|----------|----------|---------|---------|---------|----------|----------|----------|----------|---------|---------|----------|----------|----------|--------|-------|----------|
| 20 | 0.1578 | 117.4796 | 0.76696  | 1.22072 | 0.0473  | 0.38799 | 0.00347  | 97.531   | 0.6334   | 2.24178  | 0.08694 | 0.00836 | 0.0007   | 2.90234  | 0.74593  | 0.7    | 0.18  | 25.71    |
| 21 | 0.1656 | 110.1227 | 0.70639  | 0.55437 | 0.0355  | 0.36549 | 0.00463  | 98.05851 | 1.09627  | 1.01758  | 0.06519 | 0.00927 | 0.00079  | 2.13828  | 1.208    | 0.52   | 0.29  | 55.77    |
| 22 | 0.177  | 44.09942 | 0.27418  | 0.62291 | 0.02482 | 0.14603 | 0.00233  | 97.80346 | 1.46274  | 1.14346  | 0.04558 | 0.02099 | 0.00053  | 0.96843  | 0.6452   | 0.24   | 0.16  | 66.67    |
| 23 | 0.1822 | 60.15122 | 0.57216  | 1.02346 | 0.05575 | 0.191   | 0.00657  | 93.73598 | 3.11163  | 1.87928  | 0.10245 | 0.0187  | 0.00123  | 3.76875  | 1.87287  | 0.91   | 0.45  | 49.45    |
| 24 | 0.189  | 9.62969  | 0.11995  | 0.77276 | 0.04085 | 0.02758 | 0.00307  | 84.24392 | 9.39509  | 1.41869  | 0.07503 | 0.026   | 0.00067  | 1.51341  | 0.90289  | 0.37   | 0.22  | 59.46    |
| 25 | 0.2017 | 1.25531  | 0.02254  | 0.59458 | 0.02123 | 0.00266 | 0.0016   | 60.05338 | 38.59385 | 1.09143  | 0.03899 | 0.00442 | 0.00034  | 0.4898   | 0.47353  | 0.12   | 0.11  | 91.67    |
| 26 | 0.2141 | 69.71164 | 0.38882  | 0.99704 | 0.01927 | 0.23562 | 0.00333  | 99.80156 | 1.31371  | 1.83072  | 0.0354  | 0.03427 | 0.00055  | 0.13838  | 0.91609  | 0.03   | 0.22  | 733.33   |
| 27 | 0.2212 | 41.76427 | 0.26337  | 1.98158 | 0.05434 | 0.13488 | 0.00335  | 95.1094  | 2.30616  | 3.64102  | 0.09998 | 0.02348 | 0.00059  | 2.04394  | 0.96415  | 0.5    | 0.23  | 46.00    |
| 28 | 0.2268 | 48.90059 | 0.3104   | 2.3714  | 0.05032 | 0.13708 | 0.00477  | 82.48622 | 2.84642  | 4.3585   | 0.09264 | 0.02605 | 0.00092  | 8.57351  | 1.39542  | 2.08   | 0.34  | 16.35    |
| 29 | 0.2371 | 87.6483  | 0.52618  | 0.83788 | 0.03532 | 0.28772 | 0.00351  | 96.95705 | 1.07374  | 1.5383   | 0.06489 | 0.00286 | 0.00041  | 2.66777  | 0.94267  | 0.65   | 0.23  | 35.38    |
| 30 | 0.2493 | 4.35018  | 0.03784  | 0.34143 | 0.02406 | 0.00773 | 0.00158  | 52.20792 | 10.78428 | 0.62664  | 0.04417 | 0.00461 | 0.00037  | 2.06535  | 0.46697  | 0.5    | 0.11  | 22.00    |
| 31 | 0.2536 | 99.60507 | 1.20308  | 0.30238 | 0.10924 | 0.33215 | 0.01169  | 98.54453 | 3.2792   | 0.55494  | 0.20053 | 0.01035 | 0.00169  | 1.4496   | 3.26633  | 0.35   | 0.79  | 225.71   |
| 32 | 0.268  | 155.5483 | 0.62726  | 0.75601 | 0.03828 | 0.52775 | 0.00427  | 100.2379 | 0.70695  | 1.38791  | 0.07031 | 0.01673 | 0.00069  | -0.3702  | 1.10003  | -0.09  | 0.27  | -300.00  |
| 33 | 0.2699 | 341.7782 | 0.82091  | 3.89775 | 0.25515 | 1.12248 | 0.0368   | 96.96398 | 2.18963  | 7.17158  | 0.47076 | 0.0732  | 0.00425  | 10.40419 | 7.51026  | 2.52   | 1.82  | 72.22    |
| 34 | 0.2829 | 6.21704  | 0.03439  | 0.56878 | 0.04213 | 0.01535 | 0.00355  | 72.52819 | 16.96033 | 1.04404  | 0.07736 | 0.00446 | 0.00057  | 1.70046  | 1.04991  | 0.41   | 0.25  | 60.98    |
| 35 | 0.2872 | 42.51292 | 0.4084   | 0.63063 | 0.11945 | 0.12683 | 0.0126   | 88.0978  | 8.72786  | 1.15768  | 0.21938 | 0.00544 | 0.00176  | 5.05869  | 3.71006  | 1.23   | 0.9   | 73.17    |
| 36 | 0.3012 | 3.03663  | 0.02794  | 0.03649 | 0.00582 | 0.00328 | 55.76602 | 32.20333 | 0.96728  | 0.06701  | 0.00186 | 0.00058 | 0.133059 | 0.96886  | 0.32     | 0.24   | 75.00 |          |
| 37 | 0.3131 | 92.05208 | 0.48656  | 0.60251 | 0.04054 | 0.30804 | 0.00516  | 98.86289 | 1.60905  | 1.106    | 0.07445 | 0.03086 | 0.00093  | 1.04684  | 1.4817   | 0.25   | 0.36  | 144.00   |
| 38 | 0.3211 | 5.79635  | 0.04337  | 0.68824 | 0.06066 | 0.01735 | 0.00575  | 87.90516 | 29.4647  | 1.26345  | 0.11141 | 0.02994 | 0.00121  | 0.69781  | 1.70001  | 0.17   | 0.41  | 241.18   |
| 39 | 0.3247 | 670.9147 | 10.06177 | 4.58986 | 0.1544  | 0.98805 | 0.02037  | 43.4637  | 0.61618  | 8.44914  | 0.28515 | 0.02228 | 0.00211  | 380.5271 | 7.0731   | 90.08  | 1.63  | 1.81     |
| 40 | 0.3343 | 250.841  | 2.13596  | 1.07386 | 0.05087 | 0.17375 | 0.00557  | 20.4356  | 0.63239  | 1.97189  | 0.09348 | 0.00868 | 0.00079  | 199.708  | 2.32822  | 47.84  | 0.55  | 1.15     |
| 41 | 0.3415 | 0.51561  | 0.05477  | 0.93567 | 0.04726 | 0.00176 | 0.00366  | 91.36074 | 222.5206 | 1.71796  | 0.08684 | 0.00408 | 0.00079  | 0.04021  | 1.08224  | 0.01   | 0.26  | 2600.00  |
| 42 | 0.3569 | 29.56911 | 0.1701   | 0.3505  | 0.02514 | 0.08794 | 0.00156  | 87.87406 | 1.49659  | 0.64327  | 0.04615 | 0.00275 | 0.00031  | 3.58282  | 0.44352  | 0.87   | 0.11  | 12.64    |
| 43 | 0.3575 | 991.9377 | 97.12711 | 9.16807 | 1.1059  | 1.44195 | 0.14947  | 42.88098 | 1.46554  | 16.93178 | 2.05571 | 0.01222 | 0.00921  | 570.2605 | 58.0913  | 133.37 | 13.1  | 9.82     |
| 44 | 0.3621 | 8.88376  | 0.13544  | 0.9911  | 0.08945 | 0.02259 | 0.00379  | 74.46638 | 12.63538 | 1.81981  | 0.16436 | 0.01413 | 0.00113  | 2.26235  | 1.12105  | 0.55   | 0.27  | 49.09    |
| 45 | 0.3685 | 3.02867  | 0.06545  | 0.36844 | 0.05207 | 0.00303 | 0.00313  | 28.8454  | 30.83071 | 0.67621  | 0.0956  | 0.01911 | 0.00091  | 2.13447  | 0.9268   | 0.52   | 0.22  | 42.31    |
| 46 | 0.3813 | 690.0512 | 4.35914  | 0.78524 | 0.03433 | 2.35378 | 0.01625  | 100.7906 | 0.28678  | 1.4416   | 0.06306 | 0.00919 | 0.00083  | -5.45846 | 1.97988  | -1.33  | 0.48  | -36.09   |
| 47 | 0.3897 | 43.77184 | 0.31539  | 0.71008 | 0.04645 | 0.13134 | 0.00266  | 88.59605 | 1.68689  | 1.30355  | 0.08532 | 0.00125 | 0.0005   | 4.99084  | 0.73939  | 1.21   | 0.18  | 14.88    |
| 48 | 0.3958 | 45.37903 | 0.45296  | 1.18462 | 0.07399 | 0.16009 | 0.00585  | 104.0999 | 3.67957  | 2.17543  | 0.136   | 0.02113 | 0.00072  | -1.86083 | 1.66996  | -0.45  | 0.41  | -91.11   |
| 49 | 0.4098 | 3.18594  | 0.02956  | 0.66196 | 0.03144 | 0.01041 | 0.00161  | 95.75815 | 15.0504  | 1.21517  | 0.05774 | 0.02403 | 0.00051  | 0.13395  | 0.47532  | 0.03   | 0.12  | 400.00   |
| 50 | 0.4203 | 27.85888 | 0.23365  | 1.9212  | 0.04721 | 0.08905 | 0.00169  | 93.98791 | 1.66678  | 3.52993  | 0.08686 | 0.00269 | 0.00043  | 1.67539  | 0.46576  | 0.41   | 0.11  | 26.83    |
| 51 | 0.4308 | 165.1397 | 0.99314  | 0.24216 | 0.03227 | 0.53606 | 0.00526  | 95.9272  | 0.7682   | 0.4444   | 0.05924 | 0.00095 | 0.00068  | 6.72575  | 1.27086  | 1.63   | 0.31  | 19.02    |
| 52 | 0.4354 | 57.25502 | 0.85808  | 1.48624 | 0.07709 | 0.17568 | 0.00686  | 90.50288 | 3.27478  | 2.7299   | 0.14176 | 0.03232 | 0.00141  | 5.44047  | 1.87813  | 1.32   | 0.46  | 34.85    |
| 53 | 0.4407 | 625.6199 | 8.64132  | 4.16933 | 0.10307 | 0.1068  | 0.00402  | 4.98984  | 0.17691  | 7.67274  | 0.19023 | 0.02984 | 0.00129  | 596.1296 | 8.33349  | 139.19 | 1.87  | 1.34     |
| 54 | 0.4433 | 123.5579 | 3.03109  | 2.36451 | 0.1703  | 0.35517 | 0.01491  | 84.8057  | 2.90341  | 4.34581  | 0.31353 | 0.00864 | 0.00217  | 18.80066 | 3.62449  | 4.56   | 0.88  | 19.30    |
| 55 | 0.4471 | 1007.062 | 16.39073 | 2.96374 | 0.1307  | 0.92334 | 0.01839  | 27.06989 | 0.31136  | 5.44946  | 0.24082 | 0.04356 | 0.00177  | 735.9701 | 12.41171 | 170.34 | 2.74  | 1.61     |
| 56 | 0.4552 | 42.78821 | 0.36024  | 1.01162 | 0.04913 | 0.14275 | 0.00315  | 98.45845 | 2.04593  | 1.85751  | 0.09028 | 0.03062 | 0.00086  | 0.65961  | 0.87566  | 0.16   | 0.21  | 131.25   |
| 57 | 0.4635 | 72.46002 | 0.60731  | 0.77037 | 0.04928 | 0.2468  | 0.00309  | 100.5996 | 1.37808  | 1.41429  | 0.09052 | 0.02741 | 0.00077  | -0.43451 | 0.99859  | -0.11  | 0.24  | -218.18  |
| 58 | 0.4762 | 1.5533   | 0.028    | 0.69112 | 0.03302 | 0.00349 | 0.00151  | 63.99067 | 29.21073 | 1.26874  | 0.06064 | 0.00293 | 0.00039  | 0.54891  | 0.44576  | 0.13   | 0.11  | 84.62    |
| 59 | 0.4852 | 14.95966 | 0.15335  | 0.98285 | 0.0493  | 0.04991 | 0.00251  | 98.24111 | 4.88183  | 1.80465  | 0.09059 | 0.03439 | 0.00092  | 0.26278  | 0.72942  | 0.06   | 0.18  | 300.00   |
| 60 | 0.4964 | 72.65821 | 0.49596  | 0.85673 | 0.03099 | 0.24635 | 0.00379  | 100.132  | 1.39708  | 1.57294  | 0.05693 | 0.02815 | 0.0006   | -0.09594 | 1.01528  | -0.02  | 0.25  | -1250.00 |
| 61 | 0.5036 | 21.39747 | 0.21846  | 1.12583 | 0.05503 | 0.03652 | 0.0033   | 50.07661 | 4.53999  | 2.06739  | 0.10114 | 0.00104 | 0.00066  | 10.67602 | 0.97771  | 2.59   | 0.24  | 9.27     |
| 62 | 0.5126 | 7.97559  | 0.06511  | 0.64952 | 0.05223 | 0.02594 | 0.00168  | 95.80957 | 6.20957  | 1.19233  | 0.09592 | 0.00073 | 0.00043  | 0.33312  | 0.49376  | 0.08   | 0.12  | 150.00   |
| 63 | 0.5241 | 763.2457 | 6.52985  | 1.14124 | 0.03596 | 0.29764 | 0.00457  | 11.51144 | 0.14715  | 2.09571  | 0.06608 | 0.00079 | 0.00054  | 675.9037 | 5.89751  | 157.03 | 1.31  | 0.83     |
| 64 | 0.5643 | 6.73035  | 0.02706  | 0.24598 | 0.01035 | 0.0138  | 0.00059  | 60.57055 | 2.57988  | 0.45142  | 0.019   | 0.00074 | 0.00009  | 2.64249  | 0.17353  | 0.64   | 0.04  | 6.25     |
| 65 | 0.5695 | 3.89143  | 0.08683  | 0.6246  | 0.08206 | 0.01063 | 0.00267  | 80.02808 | 20.45179 | 1.14657  | 0.1507  | 0.00528 | 0.00085  | 0.7716   | 0.79146  | 0.19   | 0.19  | 100.00   |
| 66 | 0.5764 | 793.0455 | 8.45396  | 0.68912 | 0.05832 | 2.66037 | 0.03325  | 99.12574 | 0.64987  | 1.26506  | 0.10712 | 0.00548 | 0.00099  | 6.93637  | 5.1568   | 1.68   | 1.25  | 74.40    |
| 67 | 0.5859 | 185.8642 | 1.32375  | 1.19498 | 0.0521  | 0.63416 | 0.00664  | 100.7866 | 0.81939  | 2.19447  | 0.09576 | 0.02656 | 0.00055  | -1.46299 | 1.5234   | -0.36  | 0.37  | -102.78  |
| 68 | 0.5915 | 23.39225 | 0.25647  | 1.09954 | 0.07328 | 0.06424 | 0.00222  | 80.86903 | 2.9301   | 2.01906  | 0.13466 | 0.00535 | 0.0009   | 4.47296  | 0.63346  | 1.09   | 0.15  | 13.76    |
| 69 | 0.6039 | 29.26277 | 0.19423  | 0.87704 | 0.03001 | 0.09669 | 0.00153  | 97.49076 | 1.44548  | 1.61024  | 0.05513 | 0.03056 | 0.00043  | 0.73398  | 0.42313  | 0.18   | 0.1   | 55.56    |
| 70 | 0.6075 | 20.49264 | 0.42292  | 0.67199 | 0.10069 | 0.0719  | 0.00512  | 103.563  | 7.09252  | 1.2336   | 0.18493 | 0.03091 | 0.00182  | -0.72945 | 1.45199  | -0.18  | 0.35  | -194.44  |
| 71 | 0.62   | 201.3146 | 1.17644  | 0.78512 | 0.03288 | 0.69229 | 0.0058   | 101.6003 | 0.61313  | 1.44139  | 0.0604  | 0.00627 | 0.00065  | -3.22293 | 1.23486  | -0.78  | 0.3   | -38.46   |
| 72 | 0.6301 | 3.42761  | 0.04158  | 0.74159 | 0.03872 | 0.00885 | 0.00206  | 75.17158 | 17.95485 | 1.36143  | 0.07112 | 0.00407 | 0.00044  | 0.84409  | 0.61087  | 0.2    | 0.15  | 75.00    |
| 73 | 0.6385 | 67.26748 | 0.61478  | 0.45851 | 0.04677 | 0.21655 | 0.00474  | 95.1162  | 1.90741  | 0.84158  | 0.08587 | 0.00119 | 0.00054  | 3.28482  | 1.2838   | 0.8    | 0.31  | 38.75    |
| 74 | 0.6513 | 74.56271 | 0.44575  | 1.19905 | 0.03265 | 0.24167 | 0.00452  | 95.68315 | 1.71964  | 2.20195  | 0.06002 | 0.00547 | 0.0005   | 3.22021  | 1.28372  | 0.78   | 0.31  | 39.74    |
| 75 | 0.6586 | 2.83195  | 0.04775  | 0.84718 | 0.05807 | 0.00631 | 0.00262  | 64.02097 | 27.61048 | 1.55539  | 0.10667 | 0.01622 | 0.00087  | 1.00883  | 0.77472  | 0.24   | 0.19  | 79.17    |
| 76 | 0.6658 | 141.6993 | 1.4632   | 1.26224 | 0.07289 | 0.46296 | 0.00604  | 96.49259 | 0.86328  | 2.       |         |         |          |          |          |        |       |          |

|     |        |          |          |         |         |         |         |          |          |         |         |         |         |          |          |        |      |         |
|-----|--------|----------|----------|---------|---------|---------|---------|----------|----------|---------|---------|---------|---------|----------|----------|--------|------|---------|
| 111 | 0.9235 | -0.28186 | 0.08668  | 0.45306 | 0.17489 | 0.00059 | 0.01118 | -43.5599 | 1060.035 | 0.83157 | 0.3211  | 0.00471 | 0.00322 | -0.44741 | 3.3046   | -0.11  | 0.8  | -727.27 |
| 112 | 0.9277 | 28.98191 | 0.43785  | 0.81509 | 0.09717 | 0.10345 | 0.00555 | 105.3587 | 5.43769  | 1.49644 | 0.17849 | 0.0256  | 0.00202 | -1.55236 | 1.57533  | -0.38  | 0.38 | -100.00 |
| 113 | 0.9326 | 143.6357 | 1.3237   | 0.65731 | 0.0882  | 0.4894  | 0.00826 | 100.6677 | 1.46221  | 1.20663 | 0.16198 | 0.04147 | 0.0015  | -0.95932 | 2.10046  | -0.23  | 0.51 | -221.74 |
| 114 | 0.9425 | 95.6128  | 0.7362   | 0.68693 | 0.04705 | 0.32623 | 0.00439 | 100.7955 | 1.1506   | 1.26104 | 0.08641 | 0.01338 | 0.00074 | -0.76068 | 1.10007  | -0.18  | 0.27 | -150.00 |
| 115 | 0.9497 | 1.43148  | 0.04497  | 0.74281 | 0.06975 | 0.00541 | 0.00405 | 109.647  | 85.42908 | 1.36367 | 0.12811 | 0.00375 | 0.00109 | -0.1353  | 1.19804  | -0.03  | 0.29 | -966.67 |
| 116 | 0.9548 | 123.7978 | 1.26588  | 0.34342 | 0.07403 | 0.41324 | 0.00813 | 98.63917 | 1.69629  | 0.63029 | 0.1359  | 0.01385 | 0.00131 | 1.68468  | 2.10071  | 0.41   | 0.51 | 124.39  |
| 117 | 0.9654 | 690.5289 | 4.16813  | 1.18995 | 0.04137 | 0.2532  | 0.00431 | 10.82134 | 0.17247  | 2.18523 | 0.07604 | 0.00131 | 0.00064 | 616.2959 | 3.91165  | 143.72 | 0.88 | 0.61    |
| 118 | 0.9668 | 1099.353 | 54.67442 | 4.45835 | 0.36539 | 3.67092 | 0.18837 | 98.64146 | 1.25554  | 8.2063  | 0.67467 | 0.00232 | 0.00567 | 14.98188 | 13.86765 | 3.63   | 3.36 | 92.56   |
| 119 | 0.9712 | 12.49518 | 0.21738  | 0.94231 | 0.10073 | 0.03987 | 0.00494 | 93.88241 | 11.63076 | 1.73016 | 0.18506 | 0.0235  | 0.00164 | 0.7631   | 1.45122  | 0.19   | 0.35 | 184.21  |
| 120 | 0.9854 | 3.01053  | 0.02478  | 0.54131 | 0.03086 | 0.01046 | 0.00179 | 102.2263 | 17.68878 | 0.99361 | 0.05667 | 0.00413 | 0.00043 | -0.06639 | 0.52747  | -0.02  | 0.13 | -650.00 |
| 121 | 1      | 25.94178 | 0.14786  | 0.39296 | 0.02598 | 0.0794  | 0.00134 | 90.41819 | 1.44607  | 0.72123 | 0.0477  | 0.00087 | 0.00045 | 2.48354  | 0.37546  | 0.6    | 0.09 | 15.00   |

Integrated 106.0046 0.08021 0.84918 0.00437 0.25732 0.00043 71.6836 0.10816 1.55907 0.00803 0.01254 0.00007 30.0263 0.11731 7.27 0.15 2.06

# SANFORD RIVER

Weighted average of J from standards = 9.588e-05 +/- 4.822e-07

| Grain # | Cumulative 40Ar/39Ar +/- 39Ar meas. | 37Ar/39Ar +/- meas. | 36Ar/39Ar +/- meas. | % Atm. 40Ar | +/-     | Ca/K     | +/-     | Cl/K     | +/-      | 40*/39K | +/-     | Age (Ma) | +/- (Ma) | %error   |         |       |      |         |
|---------|-------------------------------------|---------------------|---------------------|-------------|---------|----------|---------|----------|----------|---------|---------|----------|----------|----------|---------|-------|------|---------|
| 1       | 0.0015                              | 63.71256            | 1.5814              | 3.45672     | 0.22155 | 0.21148  | 0.02815 | 97.68311 | 12.85207 | 6.35812 | 0.40851 | 0.02389  | 0.00438  | 1.47908  | 8.205   | 0.26  | 1.42 | 546.15  |
| 2       | 0.006                               | 9.26269             | 0.1868              | 2.27537     | 0.07854 | 0.01617  | 0.00904 | 49.72707 | 28.91284 | 4.18171 | 0.14458 | 0.03699  | 0.00242  | 4.64919  | 2.67646 | 0.8   | 0.46 | 57.50   |
| 3       | 0.0194                              | 92.82423            | 1.14806             | 0.88971     | 0.02259 | 0.30525  | 0.00652 | 97.12787 | 1.70282  | 1.63353 | 0.04151 | 0.0206   | 0.00056  | 2.66686  | 1.58171 | 0.46  | 0.27 | 58.70   |
| 4       | 0.0363                              | 26.19671            | 0.21796             | 0.69833     | 0.02842 | 0.07895  | 0.0031  | 88.93523 | 3.43313  | 1.28198 | 0.05221 | 0.03233  | 0.00095  | 2.89675  | 0.89941 | 0.5   | 0.16 | 32.00   |
| 5       | 0.0494                              | 578.1767            | 3.2776              | 2.16874     | 0.04189 | 1.90273  | 0.0198  | 97.22056 | 0.85146  | 3.98545 | 0.07709 | 0.0375   | 0.00165  | 16.09392 | 4.93155 | 2.78  | 0.85 | 30.58   |
| 6       | 0.066                               | 140.0541            | 0.82724             | 1.95407     | 0.02988 | 0.4481   | 0.00752 | 94.45055 | 1.49843  | 3.59041 | 0.05499 | 0.03353  | 0.00079  | 7.78133  | 2.1026  | 1.34  | 0.36 | 26.87   |
| 7       | 0.0826                              | 266.2562            | 1.46388             | 1.07341     | 0.02143 | 0.89757  | 0.00928 | 99.59307 | 0.88629  | 1.97105 | 0.03937 | 0.0205   | 0.00104  | 1.08417  | 2.3615  | 0.19  | 0.41 | 215.79  |
| 8       | 0.0934                              | 3.35714             | 0.05741             | 0.60942     | 0.02354 | -0.00546 | 0.00324 | -50.0357 | 28.77994 | 1.11867 | 0.04323 | 0.00577  | 0.00041  | 4.99451  | 0.9602  | 0.86  | 0.17 | 19.77   |
| 9       | 0.1028                              | 6.28649             | 0.07074             | 0.78906     | 0.02962 | 0.00705  | 0.00394 | 32.23517 | 18.59959 | 1.44862 | 0.05441 | 0.02662  | 0.00074  | 4.24228  | 1.16569 | 0.73  | 0.2  | 27.40   |
| 10      | 0.1191                              | 44.35773            | 0.36586             | 0.75976     | 0.02107 | 0.12656  | 0.0037  | 84.22748 | 2.37031  | 1.39481 | 0.03871 | 0.00544  | 0.00049  | 6.99541  | 1.05333 | 1.21  | 0.18 | 14.88   |
| 11      | 0.127                               | 136.1054            | 1.94637             | 2.04742     | 0.05306 | 0.43748  | 0.00824 | 94.87873 | 1.18371  | 3.76217 | 0.09764 | 0.03006  | 0.00132  | 6.9789   | 1.6176  | 1.21  | 0.28 | 23.14   |
| 12      | 0.1388                              | 12.56349            | 0.07934             | 1.6242      | 0.04037 | 0.02376  | 0.00316 | 54.94339 | 7.43552  | 2.98361 | 0.07425 | 0.04238  | 0.00094  | 5.6538   | 0.934   | 0.98  | 0.16 | 16.33   |
| 13      | 0.1561                              | 217.1586            | 2.55455             | 1.1229      | 0.02137 | 0.72122  | 0.01147 | 98.11125 | 1.06222  | 2.062   | 0.03928 | 0.03066  | 0.00076  | 4.10428  | 2.30923 | 0.71  | 0.4  | 56.34   |
| 14      | 0.1593                              | 226.0716            | 5.38418             | 5.25473     | 0.18786 | 0.71913  | 0.02618 | 93.81905 | 2.59456  | 9.67761 | 0.34727 | 0.02553  | 0.0031   | 14.02358 | 5.89716 | 2.42  | 1.02 | 42.15   |
| 15      | 0.1662                              | 152.1897            | 1.50805             | 2.90731     | 0.06591 | 0.4849   | 0.00863 | 94.0108  | 1.39629  | 5.34549 | 0.12143 | 0.01615  | 0.00207  | 9.13192  | 2.13129 | 1.58  | 0.37 | 23.42   |
| 16      | 0.1717                              | 19.59695            | 0.28597             | 2.3893      | 0.05659 | 0.053    | 0.00802 | 79.03175 | 12.06959 | 4.39144 | 0.10419 | 0.02706  | 0.00191  | 4.10985  | 2.36714 | 0.71  | 0.41 | 57.75   |
| 17      | 0.1751                              | 28.03479            | 0.50347             | 4.0368      | 0.14838 | 0.07152  | 0.01297 | 74.2724  | 13.62943 | 7.42814 | 0.27381 | 0.02784  | 0.00275  | 7.22566  | 3.8309  | 1.25  | 0.66 | 52.80   |
| 18      | 0.1863                              | 49.36644            | 0.39184             | 0.81443     | 0.02174 | 0.14993  | 0.00604 | 89.66199 | 3.55426  | 1.49523 | 0.03994 | 0.03641  | 0.00111  | 5.10338  | 1.75564 | 0.88  | 0.3  | 34.09   |
| 19      | 0.1911                              | 74.142              | 1.23785             | 2.90001     | 0.09595 | 0.24023  | 0.00966 | 95.46258 | 3.50973  | 5.33203 | 0.17677 | 0.03704  | 0.00208  | 3.36969  | 2.60731 | 0.58  | 0.45 | 77.59   |
| 20      | 0.1981                              | 460.7467            | 6.39301             | 3.78028     | 0.0789  | 1.53355  | 0.02627 | 98.29265 | 0.9975   | 6.95487 | 0.14554 | 0.04409  | 0.00258  | 7.88711  | 4.61    | 1.36  | 0.8  | 58.82   |
| 21      | 0.2171                              | 9.61442             | 0.05267             | 0.35672     | 0.01705 | 0.02079  | 0.00231 | 63.79919 | 7.11276  | 0.6547  | 0.03131 | 0.03213  | 0.00056  | 3.47062  | 0.68238 | 0.6   | 0.12 | 20.00   |
| 22      | 0.222                               | 51.13321            | 0.66888             | 2.15288     | 0.07626 | 0.16437  | 0.00851 | 94.69677 | 4.76476  | 3.95626 | 0.14035 | 0.02963  | 0.00215  | 2.71426  | 2.43902 | 0.47  | 0.42 | 89.36   |
| 23      | 0.2312                              | 4.76559             | 0.07177             | 1.49749     | 0.04999 | 0.00426  | 0.00559 | 23.96318 | 34.90868 | 2.7506  | 0.09192 | 0.00855  | 0.00079  | 3.60486  | 1.65606 | 0.62  | 0.29 | 46.77   |
| 24      | 0.2436                              | 34.5203             | 0.44072             | 1.64473     | 0.0366  | 0.10376  | 0.00552 | 88.50386 | 4.60167  | 3.02136 | 0.06731 | 0.02647  | 0.00085  | 3.9697   | 1.59019 | 0.69  | 0.27 | 39.13   |
| 25      | 0.2516                              | 131.4168            | 0.8034              | 1.13895     | 0.02533 | 0.45036  | 0.01026 | 101.2181 | 2.24208  | 2.0915  | 0.04654 | 0.02166  | 0.00077  | -1.60172 | 2.94791 | -0.28 | 0.51 | -182.14 |
| 26      | 0.2568                              | 416.636             | 6.13283             | 4.04892     | 0.09264 | 1.40154  | 0.0291  | 99.3315  | 1.46052  | 7.45052 | 0.17096 | 0.04554  | 0.00188  | 2.793    | 6.10234 | 0.48  | 1.05 | 218.75  |
| 27      | 0.2671                              | 16.65171            | 0.15592             | 1.76654     | 0.04609 | 0.04326  | 0.00452 | 76.03854 | 8.01297  | 3.24541 | 0.08478 | 0.01412  | 0.00044  | 3.98786  | 1.33432 | 0.69  | 0.23 | 33.33   |
| 28      | 0.2718                              | 28.14424            | 0.26561             | 1.98597     | 0.08166 | 0.07492  | 0.01035 | 78.16281 | 10.86353 | 3.6491  | 0.15026 | 0.0248   | 0.00116  | 6.14806  | 3.05979 | 1.06  | 0.53 | 50.00   |
| 29      | 0.2934                              | 8.18277             | 0.03737             | 0.70318     | 0.01279 | 0.02022  | 0.00216 | 72.57292 | 7.81938  | 1.29088 | 0.02349 | 0.00663  | 0.00047  | 2.23726  | 0.63805 | 0.39  | 0.11 | 28.21   |
| 30      | 0.3038                              | 27.93079            | 0.2343              | 1.40886     | 0.03403 | 0.07374  | 0.00534 | 77.68153 | 5.62267  | 2.58764 | 0.06256 | 0.0117   | 0.00082  | 6.2333   | 1.57199 | 1.08  | 0.27 | 25.00   |
| 31      | 0.3088                              | 7.73054             | 0.10286             | 0.75844     | 0.06108 | 0.00732  | 0.00758 | 27.2859  | 29.09246 | 1.39238 | 0.1122  | 0.01329  | 0.00162  | 5.60261  | 2.24325 | 0.97  | 0.39 | 40.21   |
| 32      | 0.3131                              | 135.252             | 1.61393             | 3.00118     | 0.09964 | 0.4362   | 0.01    | 95.13971 | 1.87735  | 5.51845 | 0.18361 | 0.03314  | 0.0021   | 6.58616  | 2.54599 | 1.14  | 0.44 | 38.60   |
| 33      | 0.3255                              | 17.66265            | 0.09941             | 0.50386     | 0.02753 | 0.04625  | 0.00355 | 77.27742 | 5.93782  | 0.92483 | 0.05056 | 0.0235   | 0.00069  | 4.00809  | 1.04792 | 0.69  | 0.18 | 26.09   |
| 34      | 0.329                               | 41.48137            | 0.5044              | 5.2507      | 0.13643 | 0.13216  | 0.01183 | 93.16839 | 8.36222  | 9.67016 | 0.25219 | 0.0558   | 0.00312  | 2.84237  | 3.47964 | 0.49  | 0.6  | 122.45  |
| 35      | 0.3315                              | 388.2885            | 6.74345             | 4.34173     | 0.18553 | 1.29884  | 0.03886 | 98.76149 | 2.41681  | 7.99008 | 0.34252 | 0.02989  | 0.00423  | 4.83411  | 9.41317 | 0.83  | 1.63 | 196.39  |
| 36      | 0.3419                              | 109.3259            | 0.51637             | 2.90395     | 0.03331 | 0.3517   | 0.00498 | 94.86812 | 1.28022  | 5.33931 | 0.06138 | 0.03156  | 0.00101  | 5.62047  | 1.40295 | 0.97  | 0.24 | 24.74   |
| 37      | 0.349                               | 107.2128            | 1.03538             | 1.27995     | 0.06309 | 0.36034  | 0.01192 | 99.24687 | 3.1483   | 2.35065 | 0.11597 | 0.02858  | 0.00149  | 0.80796  | 3.37754 | 0.14  | 0.58 | 414.29  |
| 38      | 0.3567                              | 39.32012            | 0.33228             | 1.4738      | 0.05598 | 0.11933  | 0.0072  | 89.44039 | 5.37012  | 2.70705 | 0.10294 | 0.0099   | 0.00092  | 4.15324  | 2.11275 | 0.72  | 0.36 | 50.00   |
| 39      | 0.37                                | 9.448               | 0.07507             | 1.13276     | 0.0249  | 0.02247  | 0.00367 | 69.51065 | 11.49412 | 2.08013 | 0.04576 | 0.00982  | 0.00062  | 2.87389  | 1.08385 | 0.5   | 0.19 | 38.00   |
| 40      | 0.3789                              | 36.13134            | 0.42353             | 1.60494     | 0.04021 | 0.12392  | 0.00738 | 101.0631 | 5.92861  | 2.94819 | 0.07395 | 0.03301  | 0.00113  | -0.38423 | 2.14274 | -0.07 | 0.37 | -528.57 |
| 41      | 0.3912                              | 3.38163             | 0.04373             | 0.57184     | 0.03304 | 0.00164  | 0.00383 | 13.02947 | 33.79119 | 1.04966 | 0.06067 | 0.03163  | 0.0006   | 2.91638  | 1.13388 | 0.5   | 0.2  | 40.00   |
| 42      | 0.3975                              | 8.18581             | 0.12938             | 0.69268     | 0.0405  | 0.01505  | 0.00697 | 53.83094 | 25.23862 | 1.27159 | 0.07439 | 0.01287  | 0.00088  | 3.76745  | 2.0608  | 0.65  | 0.36 | 55.38   |
| 43      | 0.4048                              | 13.86681            | 0.16803             | 1.33763     | 0.0428  | 0.03795  | 0.00572 | 80.23918 | 12.18539 | 2.45669 | 0.07868 | 0.02026  | 0.00129  | 2.73692  | 1.68852 | 0.47  | 0.29 | 61.70   |
| 44      | 0.4086                              | 92.34285            | 1.69978             | 2.46077     | 0.09645 | 0.27594  | 0.01237 | 88.10983 | 3.61673  | 4.52303 | 0.1776  | 0.02906  | 0.00284  | 10.9953  | 3.3514  | 1.9   | 0.58 | 30.53   |
| 45      | 0.415                               | 14.08504            | 0.15945             | 2.83201     | 0.07514 | 0.03099  | 0.00856 | 63.49491 | 17.98003 | 5.20677 | 0.13842 | 0.01304  | 0.00121  | 5.14122  | 2.53325 | 0.89  | 0.44 | 49.44   |
| 46      | 0.4183                              | 46.44286            | 0.67693             | 3.75332     | 0.10105 | 0.15201  | 0.01442 | 96.14614 | 0.908471 | 6.57314 | 0.18636 | 0.03251  | 0.0025   | 1.79323  | 4.22753 | 0.31  | 0.73 | 235.48  |
| 47      | 0.4245                              | 69.4167             | 0.81169             | 2.1949      | 0.06676 | 0.22141  | 0.00821 | 94.02971 | 3.32957  | 4.03359 | 0.12288 | 0.03554  | 0.0021   | 4.14904  | 2.31481 | 0.72  | 0.4  | 55.56   |
| 48      | 0.4301                              | 14.90826            | 0.22906             | 1.30263     | 0.06328 | 0.04016  | 0.0069  | 79.1965  | 13.66495 | 1.89171 | 0.11627 | 0.03393  | 0.00224  | 3.09752  | 2.0356  | 0.54  | 0.35 | 64.81   |
| 49      | 0.4337                              | 241.0923            | 3.6096              | 3.25863     | 0.08979 | 0.80313  | 0.02148 | 98.3378  | 2.19563  | 5.99293 | 0.16551 | 0.00153  | 0.00234  | 4.01619  | 5.30595 | 0.69  | 0.92 | 133.33  |
| 50      | 0.4415                              | 11.7046             | 1.06867             | 2.14035     | 0.05163 | 0.36518  | 0.00808 | 95.61493 | 1.93348  | 3.93319 | 0.09503 | 0.03091  | 0.00083  | 4.94835  | 2.18337 | 0.85  | 0.38 | 44.71   |
| 51      | 0.4623                              | 65.38998            | 0.33872             | 1.36658     | 0.02194 | 0.20986  | 0.00387 | 94.70685 | 1.6862   | 2.50991 | 0.40033 | 0.04043  | 0.00072  | 3.46296  | 1.10357 | 0.6   | 0.19 | 31.67   |
| 52      | 0.4708                              | 162.5683            | 1.2974              | 3.15143     | 0.07679 | 0.51673  | 0.00945 | 93.7827  | 1.56032  | 5.79533 | 0.14152 | 0.01383  | 0.00106  | 10.12805 | 2.5446  | 1.75  | 0.44 | 25.14   |
| 53      | 0.4816                              | 52.3938             | 0.57193             | 2.30022     | 0.04214 | 0.16488  | 0.00442 | 92.6815  | 2.2893   | 4.22745 | 0.07758 | 0.03524  | 0.00092  | 3.83659  | 1.20185 | 0.66  | 0.21 | 31.82   |
| 54      | 0.5052                              | 27.76633            | 0.12599             | 0.36201     | 0.00905 | 0.07956  | 0.00182 | 84.65271 | 1.91357  | 0.6644  | 0.01661 | 0.01258  | 0.00056  | 4.25791  | 0.53174 | 0.74  | 0.09 | 12.16   |
| 55      | 0.522                               | 7.77981             | 0.05428             | 0.96637     | 0.02314 | 0.01624  | 0.0027  | 60.87432 | 10.27271 | 1.77436 | 0.04252 | 0.00725  | 0.00038  | 3.03436  | 0.79723 | 0.52  | 0.14 | 26.92   |
| 56      | 0.5334                              | 31.22996            | 0.26726             | 0.80755     | 0.02643 | 0.09269  | 0.00344 | 87.57836 | 3.17343  | 1.48259 | 0.04856 | 0.02783  | 0.00076  | 3.8778   | 0.99151 | 0.67  | 0.17 | 25.37   |
| 57      | 0.5409                              | 130.1563            | 1                   |             |         |          |         |          |          |         |         |          |          |          |         |       |      |         |

|     |        |          |          |          |         |          |          |          |          |          |         |          |         |          |          |       |      |          |
|-----|--------|----------|----------|----------|---------|----------|----------|----------|----------|----------|---------|----------|---------|----------|----------|-------|------|----------|
| 73  | 0.7346 | 17.79465 | 0.41202  | 0.61612  | 0.11116 | -0.00349 | 0.02026  | -6.08974 | 33.70493 | 1.13098  | 0.20414 | -0.00323 | 0.00286 | 18.85501 | 6.00607  | 3.25  | 1.04 | 32.00    |
| 74  | 0.7448 | 55.03049 | 0.63751  | 0.29645  | 0.0375  | 0.17715  | 0.00449  | 95.1345  | 2.15328  | 0.54407  | 0.06883 | 0.03081  | 0.00106 | 2.67662  | 1.18525  | 0.46  | 0.2  | 43.48    |
| 75  | 0.7494 | 23.08349 | 0.38229  | 1.97524  | 0.08993 | 0.06296  | 0.00672  | 79.99769 | 8.52293  | 3.62935  | 0.16547 | 0.03374  | 0.00221 | 4.61174  | 1.96993  | 0.8   | 0.34 | 42.50    |
| 76  | 0.7556 | 50.47729 | 0.72137  | 0.89843  | 0.06313 | 0.15089  | 0.00814  | 88.23756 | 4.61459  | 1.64954  | 0.11598 | 0.03113  | 0.00196 | 5.93764  | 2.33197  | 1.03  | 0.4  | 38.83    |
| 77  | 0.7572 | 60.97334 | 2.04751  | 4.40085  | 0.29311 | 0.18727  | 0.02138  | 90.20896 | 9.92713  | 8.10013  | 0.54117 | 0.05259  | 0.00642 | 5.98563  | 6.07343  | 1.03  | 1.05 | 101.94   |
| 78  | 0.7598 | 53.17956 | 1.25956  | 3.97908  | 0.17182 | 0.17516  | 0.01554  | 96.76554 | 8.34341  | 7.32164  | 0.31704 | 0.00511  | 0.00337 | 1.72396  | 4.44757  | 0.3   | 0.77 | 256.67   |
| 79  | 0.7689 | 154.085  | 1.82353  | 1.13246  | 0.03423 | 0.52236  | 0.01281  | 10.1355  | 2.16431  | 2.07957  | 0.0629  | 0.02476  | 0.00125 | -0.20884 | 3.33687  | -0.04 | 0.58 | -1450.00 |
| 80  | 0.7715 | 32.66968 | 0.82838  | 4.70715  | 0.18177 | 0.11269  | 0.01329  | 100.8312 | 11.76399 | 8.66578  | 0.33575 | 0.01458  | 0.00329 | -0.27221 | 3.85256  | -0.05 | 0.67 | -1340.00 |
| 81  | 0.777  | 265.1165 | 3.36781  | 2.27965  | 0.07184 | 0.89397  | 0.01919  | 99.58267 | 1.73666  | 4.1896   | 0.13224 | 0.02664  | 0.00158 | 1.10807  | 4.61125  | 0.19  | 0.8  | 421.05   |
| 82  | 0.783  | 14.08275 | 0.25081  | 2.22544  | 0.07394 | 0.04782  | 0.00545  | 99.24635 | 11.35415 | 4.0898   | 0.13609 | 0.02081  | 0.00169 | 0.10608  | 1.59817  | 0.02  | 0.28 | 1400.00  |
| 83  | 0.7937 | 8.0085   | 0.07419  | 1.32686  | 0.03991 | 0.02656  | 0.00424  | 97.00747 | 15.6844  | 2.43689  | 0.07336 | 0.01715  | 0.00093 | 0.23899  | 1.25264  | 0.04  | 0.22 | 550.00   |
| 84  | 0.8023 | 85.4425  | 0.93827  | 1.47361  | 0.0405  | 0.27976  | 0.0081   | 96.64674 | 2.60801  | 2.70668  | 0.07447 | 0.02308  | 0.00105 | 2.8671   | 2.23054  | 0.5   | 0.39 | 78.00    |
| 85  | 0.8138 | 17.88683 | 0.15459  | 0.85524  | 0.02294 | 0.0492   | 0.00362  | 81.01646 | 5.96265  | 1.57019  | 0.04214 | 0.02611  | 0.00094 | 3.39197  | 1.0662   | 0.59  | 0.18 | 30.51    |
| 86  | 0.8162 | 17.86407 | 0.41576  | 3.98351  | 0.14052 | 0.04607  | 0.01445  | 74.4908  | 23.90254 | 7.32982  | 0.25929 | 0.00093  | 0.00247 | 4.56226  | 4.27769  | 0.79  | 0.74 | 93.67    |
| 87  | 0.8206 | 8.47435  | 0.16961  | 2.27624  | 0.07633 | 0.00679  | 0.00746  | 21.5217  | 26.08532 | 4.18332  | 0.14051 | 0.03766  | 0.00174 | 6.63793  | 2.21113  | 1.15  | 0.38 | 33.04    |
| 88  | 0.8244 | 15.81658 | 0.34587  | 1.04167  | 0.09723 | 0.04334  | 0.00868  | 80.5869  | 16.16607 | 1.91273  | 0.17867 | 0.03355  | 0.00223 | 3.06698  | 2.5556   | 0.53  | 0.44 | 83.02    |
| 89  | 0.8272 | 39.54691 | 0.76286  | 3.05978  | 0.09959 | 0.10702  | 0.01205  | 79.3878  | 8.9034   | 5.62644  | 0.18353 | 0.03172  | 0.00334 | 8.16302  | 3.53197  | 1.41  | 0.61 | 43.26    |
| 90  | 0.8404 | 7.35408  | 0.04956  | 0.73762  | 0.03442 | 0.01523  | 0.00249  | 60.60461 | 10.0294  | 1.35414  | 0.06322 | 0.02913  | 0.00068 | 2.88698  | 0.73548  | 0.5   | 0.13 | 26.00    |
| 91  | 0.8414 | 40.61592 | 1.57024  | 3.94795  | 0.30997 | 0.1182   | 0.03669  | 85.25681 | 26.53506 | 7.26421  | 0.57194 | 0.03164  | 0.00524 | 6.00045  | 10.80431 | 1.04  | 1.87 | 179.81   |
| 92  | 0.8465 | 7.62942  | 0.14022  | 0.91971  | 0.06654 | 0.03228  | 0.00566  | 124.5291 | 22.00503 | 1.68864  | 0.12225 | 0.03663  | 0.00146 | -1.86536 | 1.67225  | -0.32 | 0.29 | -90.63   |
| 93  | 0.8472 | 108.2211 | 0.8161   | 10.71532 | 0.96216 | 0.29321  | 0.05701  | 79.26613 | 14.4107  | 19.81105 | 1.79246 | 0.01588  | 0.00687 | 22.60335 | 15.80466 | 3.9   | 2.72 | 69.74    |
| 94  | 0.8534 | 112.1287 | 1.27953  | 1.56018  | 0.0484  | 0.36459  | 0.01236  | 95.99461 | 3.07359  | 2.86588  | 0.089   | 0.02566  | 0.00151 | 4.49495  | 3.44989  | 0.78  | 0.6  | 76.92    |
| 95  | 0.854  | 22.57867 | 1.54212  | 10.17391 | 0.9003  | 0.04007  | 0.05782  | 48.79694 | 75.70313 | 18.80281 | 1.67593 | 0.00881  | 0.00705 | 11.62943 | 17.21711 | 2.01  | 2.97 | 147.76   |
| 96  | 0.8634 | 6.63643  | 0.07118  | 0.52513  | 0.03304 | 0.01431  | 0.00395  | 63.3689  | 17.67728 | 0.9639   | 0.06066 | 0.03354  | 0.00069 | 2.42102  | 1.16903  | 0.42  | 0.2  | 47.62    |
| 97  | 0.8673 | 174.3347 | 2.56626  | 3.30958  | 0.08962 | 0.58327  | 0.01412  | 98.72488 | 1.91969  | 6.08686  | 0.16522 | 0.03403  | 0.00208 | 2.22781  | 3.35457  | 0.38  | 0.58 | 152.63   |
| 98  | 0.8694 | 94.92385 | 2.49559  | 1.54546  | 0.14941 | 0.31717  | 0.0196   | 98.63258 | 5.53072  | 2.83881  | 0.27474 | 0.00732  | 0.00321 | 1.29902  | 5.25429  | 0.22  | 0.91 | 413.64   |
| 99  | 0.8728 | 19.654   | 0.40136  | 1.13589  | 0.11675 | 0.04594  | 0.01193  | 68.69376 | 17.91414 | 2.08588  | 0.21457 | 0.02684  | 0.00218 | 6.14857  | 3.52125  | 1.06  | 0.61 | 57.55    |
| 100 | 0.8799 | 141.812  | 1.74551  | 0.9393   | 0.04726 | 0.4721   | 0.01211  | 98.34021 | 2.23116  | 1.72463  | 0.08683 | 0.00833  | 0.00127 | 2.35485  | 3.16601  | 0.41  | 0.55 | 134.15   |
| 101 | 0.885  | 10.63808 | 0.13354  | 0.80906  | 0.05532 | -0.00404 | 0.0083   | -11.8784 | 23.13015 | 1.48536  | 0.10162 | 0.01245  | 0.0056  | 11.87529 | 2.45944  | 2.05  | 0.42 | 20.49    |
| 102 | 0.8888 | 134.0299 | 1.81392  | 2.0553   | 0.0781  | 0.42675  | 0.01319  | 93.98044 | 2.63216  | 3.77667  | 0.14372 | 0.03341  | 0.0025  | 8.07795  | 3.53546  | 1.4   | 0.61 | 43.57    |
| 103 | 0.8922 | 41.03226 | 0.6689   | 2.10169  | 0.1359  | 0.13075  | 0.01015  | 93.80882 | 7.16844  | 3.86204  | 0.2501  | 0.02187  | 0.00176 | 2.54232  | 2.94447  | 0.44  | 0.51 | 115.91   |
| 104 | 0.8933 | 14.97402 | 0.45799  | 5.73365  | 0.3191  | 0.01581  | 0.02499  | 28.09924 | 49.40251 | 10.56322 | 0.59028 | 0.0266   | 0.00542 | 10.78885 | 7.42252  | 1.86  | 1.28 | 68.82    |
| 105 | 0.9013 | 3.09658  | 0.04224  | 4.2035   | 0.03551 | -0.00182 | 0.0039   | -18.6588 | 37.55003 | 0.7715   | 0.06519 | 0.03105  | 0.00121 | 3.64022  | 1.1528   | 0.63  | 0.2  | 31.75    |
| 106 | 0.906  | 189.1966 | 2.2809   | 1.64467  | 0.06576 | 0.62753  | 0.01546  | 97.95538 | 2.11684  | 3.02125  | 0.12094 | 0.03147  | 0.00151 | 3.87224  | 4.00972  | 0.67  | 0.69 | 102.99   |
| 107 | 0.911  | 17.78845 | 0.27953  | 2.23894  | 0.07868 | 0.0418   | 0.00677  | 68.51532 | 11.21103 | 4.11465  | 0.14482 | 0.03594  | 0.00193 | 5.60015  | 1.99656  | 0.97  | 0.34 | 35.05    |
| 108 | 0.9176 | 86.98134 | 1.27352  | 0.30219  | 0.03869 | 0.27614  | 0.00799  | 93.8174  | 2.34792  | 0.5546   | 0.07102 | 0.02719  | 0.00103 | 5.37702  | 2.04387  | 0.93  | 0.35 | 37.63    |
| 109 | 0.9275 | 4.56604  | 0.04575  | 0.67078  | 0.02354 | 0.00773  | 0.00459  | 14.958   | 29.90808 | 1.23137  | 0.04324 | 0.03171  | 0.0008  | 2.30802  | 1.35774  | 0.4   | 0.23 | 57.50    |
| 110 | 0.9455 | 67.60218 | 0.40807  | 0.35219  | 0.0128  | 0.21454  | 0.00303  | 93.77908 | 1.21485  | 0.64637  | 0.0235  | 0.03189  | 0.0007  | 4.20468  | 0.82226  | 0.73  | 0.14 | 19.18    |
| 111 | 0.9508 | 438.8605 | 5.34123  | 2.66484  | 0.0492  | 1.47717  | 0.02185  | 99.4199  | 0.84653  | 4.89884  | 0.09061 | 0.03915  | 0.0015  | 2.55047  | 3.72225  | 0.44  | 0.64 | 145.45   |
| 112 | 0.9527 | 11.25151 | 0.46639  | 5.30932  | 0.25166 | 0.0194   | 0.02181  | 47.19797 | 57.4034  | 9.77853  | 0.46524 | 0.03046  | 0.00342 | 5.9477   | 6.47215  | 1.03  | 1.12 | 108.74   |
| 113 | 0.9547 | 37.65721 | 1.25825  | 1.42725  | 0.1175  | 0.01843  | 91.96482 | 14.14851 | 2.62145  | 0.2617   | 0.0273  | 0.00346  | 0.00346 | 5.33038  | 3.30308  | 0.52  | 0.92 | 176.92   |
| 114 | 0.9605 | 10.41576 | 0.1071   | 0.14199  | 0.0474  | 0.02586  | 0.00894  | 73.45026 | 25.42375 | 0.26056  | 0.08699 | 0.00569  | 0.00097 | 2.75775  | 2.64109  | 0.48  | 0.46 | 95.83    |
| 115 | 0.9651 | 748.8779 | 13.78726 | 3.36184  | 0.1023  | 2.51566  | 0.04875  | 99.23242 | 0.62329  | 6.18319  | 0.1886  | 0.01731  | 0.00202 | 5.76172  | 4.68112  | 1     | 0.81 | 81.00    |
| 116 | 0.9704 | 3.85559  | 0.08776  | 1.14626  | 0.07303 | 0.01204  | 0.0092   | 90.51704 | 71.09839 | 2.10493  | 0.13422 | 0.03755  | 0.00147 | 0.3631   | 2.72253  | 0.06  | 0.47 | 783.33   |
| 117 | 0.9736 | 67.24776 | 0.97739  | 3.50215  | 0.17948 | 0.23841  | 0.01585  | 104.3806 | 6.80904  | 6.4419   | 0.33097 | 0.0443   | 0.00287 | -2.95185 | 4.58825  | -0.51 | 0.79 | -154.90  |
| 118 | 0.9797 | 16.00814 | 0.19381  | 1.03464  | 0.06398 | 0.04161  | 0.00643  | 76.42306 | 11.85922 | 1.89982  | 0.11756 | 0.02976  | 0.00155 | 3.76999  | 1.8972   | 0.65  | 0.33 | 50.77    |
| 119 | 0.9852 | 20.56331 | 0.24381  | 1.93523  | 0.09217 | 0.05935  | 0.00745  | 84.63236 | 10.68744 | 3.55574  | 0.16958 | 0.02517  | 0.00118 | 3.15986  | 2.19818  | 0.55  | 0.38 | 69.09    |
| 120 | 0.9888 | 51.86223 | 0.91334  | 4.03113  | 0.12895 | 0.17538  | 0.01509  | 99.34349 | 8.42994  | 7.41769  | 0.23796 | 0.02901  | 0.00211 | 0.34126  | 4.38198  | 0.06  | 0.76 | 1266.67  |
| 121 | 1      | 13.37617 | 0.07726  | 0.46847  | 0.02868 | 0.03331  | 0.0038   | 73.54567 | 8.40812  | 0.85986  | 0.05265 | 0.00232  | 0.00052 | 3.54404  | 1.12299  | 0.61  | 0.19 | 31.15    |

Integrated 85.55911 0.08204 1.37241 0.00414 0.27619 0.00076 95.28901 0.24589 2.52062 0.0076 0.02516 0.00011 0.403319 0.2106 0.7 0.04 5.71

# ROCK LAKE

Weighted average of J from standards = 1.347e-04 2.749e-06

| Grain # | Cumulative 40Ar/39Ar<br>39Ar | 40Ar/39Ar<br>meas. | 37Ar/39Ar<br>meas. | 36Ar/39Ar<br>meas. | % Atm.<br>40Ar | Ca/K    | Cl/K    | 40*/39K  | Age<br>(Ma) | %error   |         |          |          |          |          |        |       |        |
|---------|------------------------------|--------------------|--------------------|--------------------|----------------|---------|---------|----------|-------------|----------|---------|----------|----------|----------|----------|--------|-------|--------|
| 1       | 0.0475                       | 88.68211           | 0.58424            | 0.28438            | 0.05698        | 0.03094 | 0.00152 | 10.28769 | 0.50251     | 0.5219   | 0.10459 | 0.00148  | 0.00043  | 79.5481  | 0.69543  | 19.21  | 0.17  | 0.88   |
| 2       | 0.0662                       | 98.14469           | 1.32208            | 1.74286            | 0.13974        | 0.17787 | 0.00526 | 53.42418 | 1.42175     | 3.20186  | 0.25704 | 0.00479  | 0.00109  | 45.75419 | 1.53499  | 11.07  | 0.37  | 3.34   |
| 3       | 0.0895                       | 106.3865           | 1.39117            | 1.29825            | 0.11397        | 0.08684 | 0.00254 | 24.0265  | 0.63397     | 2.3843   | 0.20949 | 0.01383  | 0.00113  | 80.87714 | 1.25859  | 19.53  | 0.3   | 1.54   |
| 4       | 0.1088                       | 100.8646           | 1.52259            | 0.5097             | 0.13967        | 0.0487  | 0.00577 | 14.23085 | 1.67894     | 0.93557  | 0.25646 | 0.00473  | 0.00107  | 86.51638 | 2.14185  | 20.88  | 0.51  | 2.44   |
| 5       | 0.1125                       | 212.0325           | 11.68258           | 4.68205            | 0.72712        | 0.54191 | 0.03473 | 75.35162 | 2.47363     | 8.61941  | 1.34303 | 0.04498  | 0.00618  | 52.42863 | 6.00981  | 12.68  | 1.45  | 11.44  |
| 6       | 0.1539                       | 135.3814           | 0.9061             | 0.29347            | 0.05708        | 0.14497 | 0.00175 | 31.63294 | 0.32892     | 0.53859  | 0.10477 | 0.00281  | 0.0005   | 92.55516 | 0.77973  | 22.33  | 0.19  | 0.85   |
| 7       | 0.1695                       | 998.6948           | 17.15933           | 0.4011             | 0.10425        | 0.1367  | 0.00804 | 0.41518  | 0.22745     | 0.73618  | 0.19139 | 0.00867  | 0.0022   | 958.5748 | 16.6322  | 218.84 | 3.58  | 1.64   |
| 8       | 0.1741                       | 1226.928           | 88.04339           | 3.73136            | 0.49172        | 0.37464 | 0.03865 | 9.00048  | 0.66923     | 6.20406  | 0.90656 | 0.02514  | 0.00816  | 1119.137 | 80.92677 | 253.04 | 17.07 | 6.75   |
| 9       | 0.2175                       | 193.1712           | 1.55759            | 0.54788            | 0.04218        | 0.48181 | 0.00541 | 62.42724 | 0.68726     | 1.00657  | 0.07745 | 0.01552  | 0.00088  | 72.59669 | 1.48251  | 17.54  | 0.36  | 2.05   |
| 10      | 0.2256                       | 293.8403           | 12.36927           | 1.56726            | 0.2509         | 0.64069 | 0.0314  | 64.3933  | 1.62811     | 2.8789   | 0.46139 | 0.01712  | 0.00352  | 104.7322 | 6.52653  | 25.25  | 1.56  | 6.18   |
| 11      | 0.2317                       | 156.6604           | 7.80835            | 5.82549            | 0.48611        | 0.4312  | 0.03213 | 81.04317 | 4.50995     | 10.78308 | 0.89935 | 0.04241  | 0.00577  | 29.81547 | 7.25071  | 7.22   | 1.75  | 24.24  |
| 12      | 0.2643                       | 94.79356           | 1.18081            | 0.66454            | 0.05778        | 0.04344 | 0.00388 | 13.48883 | 1.19952     | 1.21991  | 0.10612 | 0.00568  | 0.00106  | 82.01983 | 1.52123  | 19.8   | 0.37  | 1.87   |
| 13      | 0.2956                       | 110.6558           | 1.46803            | 0.41567            | 0.09703        | 0.10198 | 0.00544 | 27.20914 | 1.41012     | 0.76291  | 0.17815 | 0.01876  | 0.00125  | 80.54933 | 1.89972  | 19.45  | 0.46  | 2.37   |
| 14      | 0.3031                       | 77.4828            | 28.91618           | 5.97817            | 0.53724        | 0.86852 | 0.04083 | 32.90798 | 0.95296     | 11.01562 | 0.99414 | 0.03724  | 0.0057   | 524.4574 | 20.9532  | 123.01 | 4.75  | 3.86   |
| 15      | 0.3043                       | 93.51793           | 26.74056           | 8.8088             | 3.5371         | 0.21363 | 0.01522 | 66.74917 | 43.7459     | 16.26412 | 6.5716  | 0.07032  | 0.04214  | 31.28026 | 42.13809 | 7.58   | 10.19 | 134.43 |
| 16      | 0.3148                       | 96.92104           | 3.11375            | 0.34501            | 0.37793        | 0.12179 | 0.0197  | 36.77405 | 5.89363     | 7.99704  | 0.69773 | 0.04595  | 0.00403  | 61.44909 | 6.06768  | 16.85  | 1.46  | 9.83   |
| 17      | 0.3431                       | 90.9963            | 1.19538            | 0.84806            | 0.1212         | 0.07272 | 0.00604 | 23.54481 | 1.93925     | 1.55701  | 0.22264 | 0.002754 | 0.00128  | 69.59037 | 1.99255  | 16.81  | 0.48  | 2.86   |
| 18      | 0.3699                       | 101.2648           | 1.63092            | 0.76391            | 0.15502        | 0.0943  | 0.00708 | 27.46464 | 2.02082     | 1.40242  | 0.28475 | 0.02753  | 0.00152  | 73.47087 | 2.36748  | 17.75  | 0.57  | 3.21   |
| 19      | 0.4089                       | 77.37205           | 1.01281            | 0.32066            | 0.07983        | 0.02832 | 0.00373 | 10.78695 | 1.42058     | 0.5885   | 0.14654 | 0.02196  | 0.00097  | 69.0151  | 1.42645  | 16.68  | 0.34  | 2.04   |
| 20      | 0.4359                       | 85.74161           | 3.13256            | 0.22562            | 0.10251        | 0.0475  | 0.42906 | 1.66304  | 0.41404     | 0.22746  | 0.00059 | 0.00137  | 82.04713 | 1.8839   | 19.81    | 0.45   | 2.27  |        |
| 21      | 0.4578                       | 199.7259           | 6.05407            | 1.08221            | 0.16619        | 0.27498 | 0.01102 | 40.64479 | 1.07333     | 1.98723  | 0.3054  | 0.01223  | 0.00244  | 118.6208 | 4.20154  | 28.57  | 1     | 3.50   |
| 22      | 0.4704                       | 268.1812           | 9.36247            | 3.86482            | 0.34749        | 0.80789 | 0.0323  | 88.93032 | 1.75095     | 7.11083  | 0.64108 | 0.0362   | 0.00411  | 29.75776 | 4.82667  | 7.21   | 1.17  | 16.23  |
| 23      | 0.5064                       | 92.1938            | 1.00349            | 0.80565            | 0.13244        | 0.03875 | 0.00495 | 12.35132 | 1.5816      | 1.4791   | 0.24329 | 0.00781  | 0.00113  | 80.82662 | 1.70584  | 19.51  | 0.41  | 21.10  |
| 24      | 0.5202                       | 82.27133           | 3.24272            | 1.84043            | 0.33091        | 0.06618 | 0.01097 | 23.59518 | 3.82267     | 3.38133  | 0.60876 | 0.02034  | 0.00308  | 62.91837 | 4.05118  | 15.21  | 0.98  | 6.44   |
| 25      | 0.5623                       | 97.52875           | 0.88262            | 0.35009            | 0.07336        | 0.06278 | 0.00406 | 18.99637 | 1.21893     | 0.64252  | 0.13468 | 0.02235  | 0.00103  | 78.99731 | 1.39331  | 19.07  | 0.33  | 1.73   |
| 26      | 0.5936                       | 98.1593            | 1.47224            | 0.44848            | 0.12136        | 0.03434 | 0.00418 | 10.30285 | 1.24947     | 0.82316  | 0.22282 | 0.00373  | 0.00137  | 88.04735 | 1.8056   | 21.25  | 0.43  | 2.02   |
| 27      | 0.6212                       | 94.10336           | 1.64568            | 0.40498            | 0.13003        | 0.00951 | 0.00573 | 2.95135  | 1.79855     | 0.74329  | 0.23872 | 0.00155  | 0.00168  | 91.32334 | 2.32836  | 22.03  | 0.56  | 2.54   |
| 28      | 0.6516                       | 162.2068           | 3.16472            | 0.78213            | 0.16566        | 0.16834 | 0.00605 | 30.63284 | 0.93127     | 1.43589  | 0.3043  | 0.00623  | 0.0017   | 112.5598 | 2.67817  | 27.12  | 0.64  | 2.36   |
| 29      | 0.6786                       | 323.4766           | 7.11409            | 0.65219            | 0.17812        | 0.86929 | 0.02047 | 79.40128 | 0.70928     | 1.19723  | 0.32712 | 0.03464  | 0.00225  | 66.6566  | 2.75236  | 16.11  | 0.66  | 4.10   |
| 30      | 0.6846                       | 389.2131           | 41.31375           | 3.61058            | 0.76838        | 1.1431  | 0.1264  | 86.71681 | 2.69664     | 6.64185  | 1.41709 | 0.02966  | 0.00992  | 51.82812 | 11.89706 | 12.54  | 2.87  | 22.89  |
| 31      | 0.7002                       | 139.6995           | 4.68615            | 0.14751            | 0.32124        | 0.20732 | 0.02538 | 43.85482 | 5.16749     | 0.27068  | 0.58956 | 0.02318  | 0.00278  | 78.42547 | 6.76874  | 18.94  | 1.85  | 9.77   |
| 32      | 0.7096                       | 118.8214           | 7.97608            | 0.10725            | 0.50686        | 0.02894 | 0.04106 | 7.19149  | 10.20287    | 0.19681  | 0.93016 | -0.00381 | 0.00528  | 110.2571 | 14.2041  | 26.57  | 3.4   | 12.80  |
| 33      | 0.7155                       | 125.8004           | 11.47965           | 2.6393             | 0.93304        | 0.06629 | 0.06508 | 15.40149 | 15.23931    | 4.8518   | 1.7184  | 0.01936  | 0.00988  | 106.5988 | 21.5198  | 25.69  | 5.15  | 20.05  |
| 34      | 0.7577                       | 93.53233           | 1.72214            | 0.34201            | 0.12347        | 0.01515 | 0.00927 | 4.75708  | 2.92951     | 0.62769  | 0.22667 | 0.00409  | 0.0013   | 95.07615 | 3.19432  | 21.49  | 0.77  | 3.58   |

|    |        |          |          |         |         |          |         |          |          |         |          |          |         |          |          |        |      |        |
|----|--------|----------|----------|---------|---------|----------|---------|----------|----------|---------|----------|----------|---------|----------|----------|--------|------|--------|
| 35 | 0.8112 | 84.99861 | 0.93208  | 0.41217 | 0.11321 | 0.02487  | 0.00716 | 8.6104   | 2.48918  | 0.75649 | 0.20784  | 0.00268  | 0.00103 | 77.67537 | 2.28197  | 18.76  | 0.55 | 2.93   |
| 36 | 0.9005 | 112.2672 | 0.8918   | 0.44455 | 0.05776 | 0.14996  | 0.00497 | 39.44808 | 1.28395  | 0.81595 | 0.10605  | 0.02061  | 0.00081 | 67.98333 | 1.56205  | 16.43  | 0.38 | 2.31   |
| 37 | 0.9064 | 115.1142 | 10.78211 | 0.35662 | 1.11601 | -0.00024 | 0.02371 | -0.08776 | 6.08747  | 0.05452 | 0.204876 | 0.00513  | 0.00893 | 115.2146 | 12.87298 | 27.75  | 3.08 | 11.10  |
| 38 | 0.9308 | 112.3871 | 2.94429  | 0.05134 | 0.29891 | 0.04839  | 0.00616 | 12.72241 | 1.58583  | 0.09421 | 0.54849  | -0.00132 | 0.00261 | 98.06641 | 3.13121  | 23.65  | 0.75 | 3.17   |
| 39 | 0.9472 | 1094.619 | 83.56775 | 2.7148  | 0.66394 | 0.1105   | 0.01385 | 2.96253  | 0.29644  | 4.99085 | 1.22293  | 0.03364  | 0.00785 | 1064.202 | 81.47069 | 241.41 | 17.3 | 7.17   |
| 40 | 0.9707 | 8.18332  | 0.38184  | 1.70116 | 0.36854 | 0.05327  | 0.00922 | 191.3309 | 32.56272 | 3.12515 | 0.67784  | 0.1065   | 0.00662 | -7.45577 | 2.66655  | -1.81  | 0.65 | -35.91 |
| 41 | 0.9776 | 65.57173 | 9.23886  | 8.49111 | 1.47351 | 0.21515  | 0.04492 | 96.39283 | 14.98509 | 8.92802 | 2.7223   | 0.06593  | 0.01566 | 2.73234  | 9.86271  | 0.58   | 2.39 | 412.07 |
| 42 | 1      | 132.1328 | 4.62898  | 1.35413 | 0.32796 | 0.12972  | 0.01008 | 28.93346 | 2.01899  | 2.48703 | 0.60292  | 0.01458  | 0.00337 | 93.97098 | 4.25662  | 22.67  | 1.02 | 4.50   |

Integrated 159.4871 0.56145 0.88579 0.0303 0.1497 0.00145 27.69617 0.25089 1.62633 0.05567 0.0163 0.00034 115.366 0.57186 27.79 0.58 2.09

# FRANCIS CREEK

Weighted average of J from standards = 9.588e-05 +/- 4.822e-07

| Grain # | Cumulative 40Ar/39Ar +/- 39Ar meas. |          | 37Ar/39Ar +/- meas. |          | 36Ar/39Ar +/- meas. |          | % Atm. 40Ar | +/-      | Ca/K     | +/-      | Cl/K    | +/-      | 40*/39K | +/-      | Age (Ma)  | +/- (Ma) | %error |       |
|---------|-------------------------------------|----------|---------------------|----------|---------------------|----------|-------------|----------|----------|----------|---------|----------|---------|----------|-----------|----------|--------|-------|
| 1       | 0.0108                              | 195.1915 | 1.39241             | 0.55853  | 0.03189             | 0.20521  | 0.00935     | 31.04806 | 1.40182  | 1.02523  | 0.05856 | 0.00142  | 0.00093 | 134.6209 | 2.91365   | 23.11    | 0.5    | 2.16  |
| 2       | 0.012                               | 102.8796 | 9.04354             | 3.9067   | 0.44179             | -0.01893 | 0.06027     | -5.75221 | 17.30991 | 7.18809  | 0.81511 | 0.11597  | 0.01402 | 109.067  | 20.27706  | 18.75    | 3.47   | 18.51 |
| 3       | 0.0162                              | 121.7568 | 3.01038             | 2.37329  | 0.10132             | 0.00609  | 0.02029     | 1.3183   | 4.92539  | 4.36197  | 0.18653 | 0.02179  | 0.00324 | 120.324  | 6.70485   | 20.67    | 1.15   | 5.56  |
| 4       | 0.0524                              | 1063.194 | 5.69497             | 0.82114  | 0.01356             | 3.12376  | 0.03057     | 86.81676 | 0.71341  | 1.50756  | 0.02492 | 0.05766  | 0.00184 | 140.2408 | 7.62981   | 24.07    | 1.3    | 5.40  |
| 5       | 0.0873                              | 136.766  | 0.72097             | 1.02565  | 0.02013             | 0.01038  | 0.00201     | 2.18129  | 0.43434  | 1.88329  | 0.03699 | 0.0061   | 0.00059 | 133.8507 | 0.92336   | 22.98    | 0.16   | 0.70  |
| 6       | 0.0896                              | 216.0355 | 8.34129             | 2.29416  | 0.19159             | 0.2515   | 0.04845     | 34.31819 | 6.49588  | 4.2163   | 0.35269 | 0.01002  | 0.00598 | 142.1068 | 15.09744  | 24.39    | 2.57   | 10.54 |
| 7       | 0.091                               | 138.4597 | 7.96378             | 5.90693  | 0.46782             | 0.05455  | 0.06488     | 11.29343 | 13.83438 | 10.88381 | 0.8656  | 0.01828  | 0.00776 | 123.311  | 20.50985  | 21.18    | 3.5    | 16.53 |
| 8       | 0.0925                              | 171.8341 | 10.15425            | 4.6722   | 0.43035             | 0.0663   | 0.04997     | 11.17946 | 8.56795  | 8.60122  | 0.79486 | 0.00001  | 0.00595 | 153.1028 | 17.33987  | 26.26    | 2.95   | 11.23 |
| 9       | 0.0987                              | 173.3426 | 3.23019             | 1.12246  | 0.11095             | 0.1254   | 0.01175     | 21.32695 | 1.96288  | 2.0612   | 0.2039  | 0.02734  | 0.00178 | 136.4587 | 4.25279   | 23.42    | 0.73   | 3.12  |
| 10      | 0.1057                              | 1787.979 | 22.9234             | 0.86913  | 0.08522             | 5.85719  | 0.09116     | 96.79957 | 0.85637  | 1.59572  | 0.15656 | 0.02424  | 0.00346 | 57.25712 | 15.33992  | 9.87     | 2.64   | 26.75 |
| 11      | 0.1108                              | 232.9537 | 3.83924             | 1.47373  | 0.09627             | 0.36816  | 0.01724     | 46.65398 | 2.04876  | 2.70691  | 0.17701 | 0.01246  | 0.00161 | 124.3852 | 5.20299   | 21.36    | 0.89   | 4.17  |
| 12      | 0.1198                              | 139.8364 | 3.0784              | 1.00645  | 0.0627              | 0.01319  | 0.01119     | 2.72937  | 2.36532  | 1.84801  | 0.11521 | 0.01189  | 0.00132 | 136.0876 | 4.46623   | 23.36    | 0.76   | 3.25  |
| 13      | 0.1287                              | 119.5937 | 1.25247             | 2.74872  | 0.08331             | 0.00607  | 0.00938     | 1.31015  | 2.31892  | 5.05333  | 0.15347 | 0.01149  | 0.00116 | 118.2271 | 3.0429    | 20.31    | 0.52   | 2.56  |
| 14      | 0.1382                              | 136.4764 | 1.6312              | 0.71964  | 0.05929             | 0.02262  | 0.00823     | 4.8559   | 1.78114  | 1.32111  | 0.10889 | 0.00466  | 0.00082 | 129.887  | 2.88632   | 22.3     | 0.49   | 2.20  |
| 15      | 0.1431                              | 203.8352 | 5.27872             | 1.39037  | 0.12686             | 0.2267   | 0.01929     | 32.81367 | 2.66489  | 2.55364  | 0.23324 | 0.04671  | 0.00359 | 137.064  | 6.49683   | 23.53    | 1.11   | 4.72  |
| 16      | 0.1467                              | 159.702  | 5.19887             | 1.84389  | 0.20598             | 0.18967  | 0.02506     | 35.00562 | 4.49806  | 3.3877   | 0.37894 | 0.02748  | 0.00271 | 103.9134 | 7.95694   | 17.86    | 1.36   | 7.61  |
| 17      | 0.1511                              | 144.6168 | 3.33376             | 1.72393  | 0.08976             | 0.06194  | 0.01237     | 12.5601  | 2.51237  | 3.16703  | 0.1651  | 0.03801  | 0.00325 | 126.5809 | 4.66902   | 21.74    | 0.8    | 3.68  |
| 18      | 0.1586                              | 125.7085 | 1.91656             | 0.45297  | 0.05982             | 0.01009  | 0.00799     | 2.3431   | 1.87928  | 0.8314   | 0.10984 | 0.02738  | 0.00169 | 122.7733 | 3.01548   | 21.09    | 0.51   | 2.42  |
| 19      | 0.1608                              | 143.449  | 4.36706             | 2.82066  | 0.23864             | 0.1371   | 0.02961     | 28.80507 | 6.04251  | 5.18585  | 0.43962 | 0.0163   | 0.00454 | 103.3458 | 9.24697   | 17.77    | 1.58   | 8.89  |
| 20      | 0.1665                              | 173.231  | 2.29806             | 0.60859  | 0.08416             | 0.10566  | 0.01443     | 17.99797 | 2.44427  | 1.11716  | 0.15456 | 0.00631  | 0.00223 | 142.0897 | 4.85971   | 24.38    | 0.83   | 3.40  |
| 21      | 0.1832                              | 1059.676 | 12.64853            | 0.04016  | 0.01917             | 3.07516  | 0.04607     | 85.75566 | 0.77842  | 0.07369  | 0.03517 | 0.04107  | 0.00185 | 150.9439 | 8.44665   | 25.89    | 1.44   | 5.56  |
| 22      | 0.1908                              | 273.8323 | 3.35209             | 0.58542  | 0.04694             | 0.27266  | 0.00923     | 29.40856 | 0.93035  | 1.07461  | 0.08621 | 0.00212  | 0.00186 | 193.3611 | 3.48841   | 33.1     | 0.59   | 1.78  |
| 23      | 0.197                               | 175.8465 | 3.50889             | 0.87425  | 0.08747             | 0.15507  | 0.01436     | 26.02128 | 2.3581   | 1.60512  | 0.1607  | 0.00184  | 0.00322 | 130.1474 | 4.89828   | 22.35    | 0.84   | 3.76  |
| 24      | 0.2126                              | 130.3315 | 1.80978             | 0.89139  | 0.04634             | 0.00759  | 0.00394     | 1.66567  | 0.89434  | 1.63661  | 0.08514 | 0.02278  | 0.00105 | 128.2122 | 2.12977   | 22.02    | 0.36   | 1.63  |
| 25      | 0.214                               | 416.6178 | 23.93839            | 5.68687  | 0.41795             | 0.74914  | 0.07264     | 53.02667 | 4.15126  | 10.4767  | 0.07730 | 0.00766  | 0.011   | 196.4745 | 20.73818  | 33.63    | 3.52   | 10.47 |
| 26      | 0.2282                              | 135.08   | 1.47948             | 0.36011  | 0.02598             | 0.00674  | 0.00494     | 1.4533   | 1.08057  | 0.66093  | 0.04769 | 0.01122  | 0.00125 | 133.1214 | 2.06391   | 22.85    | 0.35   | 1.53  |
| 27      | 0.2325                              | 125.8339 | 1.936               | 0.96501  | 0.07911             | 0.02245  | 0.01222     | 5.20997  | 2.86987  | 1.77186  | 0.14536 | 0.01615  | 0.00329 | 119.3312 | 4.0537    | 20.5     | 0.69   | 3.37  |
| 28      | 0.2358                              | 165.3781 | 4.4033              | 3.4656   | 0.14147             | 0.11624  | 0.01471     | 20.60014 | 2.57166  | 6.37451  | 0.26085 | 0.01954  | 0.00415 | 131.6086 | 5.52935   | 22.6     | 0.94   | 4.16  |
| 29      | 0.2366                              | 172.6417 | 20.11383            | 6.17367  | 0.79897             | 0.25556  | 0.09346     | 43.45505 | 15.16876 | 11.37744 | 1.47887 | 0.02514  | 0.0168  | 98.03083 | 28.69824  | 16.86    | 4.91   | 29.12 |
| 30      | 0.2503                              | 141.0092 | 1.23778             | 0.44682  | 0.04028             | 0.01761  | 0.00337     | 3.66584  | 0.70587  | 0.82012  | 0.07396 | 0.00342  | 0.0013  | 135.8542 | 1.55437   | 23.32    | 0.27   | 1.16  |
| 31      | 0.2673                              | 131.3363 | 1.23527             | 0.0248   | 0.01676             | 0.00739  | 0.00404     | 1.66187  | 0.90861  | 0.0455   | 0.03075 | 0.00213  | 0.001   | 129.1267 | 1.70293   | 22.17    | 0.29   | 1.31  |
| 32      | 0.268                               | 301.1817 | 29.86388            | 7.6609   | 0.96004             | 0.38575  | 0.10751     | 37.64105 | 9.86309  | 14.13316 | 1.78075 | 0.0026   | 0.0174  | 188.8169 | 35.31897  | 32.33    | 5.99   | 18.53 |
| 33      | 0.2713                              | 135.0499 | 4.20553             | 0.86611  | 0.12604             | 0.01475  | 0.0135      | 3.17594  | 2.95282  | 1.59017  | 0.23154 | 0.01301  | 0.00594 | 130.8121 | 5.70474   | 22.46    | 0.97   | 4.32  |
| 34      | 0.2744                              | 150.0995 | 4.46052             | 1.0648   | 0.13007             | 0.00779  | 0.02324     | 1.4747   | 4.57655  | 1.95523  | 0.23901 | 0.00968  | 0.00437 | 147.968  | 8.16198   | 25.39    | 1.39   | 5.47  |
| 35      | 0.2812                              | 143.1548 | 3.58569             | 0.22584  | 0.04633             | -0.01425 | 0.0097      | -2.95484 | 2.0004   | 0.41444  | 0.08503 | 0.00631  | 0.00183 | 147.3777 | 4.67247   | 25.29    | 0.8    | 3.16  |
| 36      | 0.2854                              | 134.0426 | 3.80307             | 0.80685  | 0.0817              | -0.00487 | 0.01192     | -1.12313 | 2.62737  | 1.4813   | 0.15009 | 0.0069   | 0.00303 | 135.5953 | 5.21859   | 23.28    | 0.89   | 3.82  |
| 37      | 0.2864                              | 214.3661 | 20.90244            | 6.71895  | 0.73571             | 0.28543  | 0.06968     | 39.09304 | 8.80982  | 12.38712 | 1.36283 | 0.00912  | 0.01417 | 131.1682 | 22.92624  | 22.52    | 3.91   | 17.36 |
| 38      | 0.2896                              | 172.1042 | 7.85165             | 1.59232  | 0.11454             | 0.1017   | 0.02333     | 17.38791 | 3.92619  | 2.92498  | 0.21064 | 0.00502  | 0.0047  | 142.3144 | 9.38322   | 24.42    | 1.6    | 6.55  |
| 39      | 0.2917                              | 249.1301 | 12.82799            | 1.12577  | 0.15934             | 0.42506  | 0.03853     | 50.38686 | 3.76682  | 2.06728  | 0.29284 | 0.03167  | 0.00702 | 123.6849 | 11.36179  | 21.24    | 1.94   | 9.13  |
| 40      | 0.2984                              | 118.389  | 2.26689             | 0.03234  | 0.0404              | 0.00649  | 0.0081      | 1.61752  | 2.02222  | 0.05934  | 0.07413 | 0.00126  | 0.00221 | 116.4475 | 3.27186   | 20.01    | 0.56   | 2.80  |
| 41      | 0.3056                              | 135.2942 | 2.42386             | 1.05523  | 0.07695             | 0.00046  | 0.01073     | 0.03611  | 2.34489  | 1.93764  | 0.14141 | -0.00018 | 0.00174 | 135.3166 | 3.99548   | 23.23    | 0.68   | 2.93  |
| 42      | 0.3128                              | 121.2187 | 1.42596             | 0.17846  | 0.05206             | 0.02063  | 0.02666     | 5.0177   | 6.50104  | 0.3275   | 0.09554 | 0.02545  | 0.00291 | 115.1226 | 7.99558   | 19.78    | 1.37   | 6.93  |
| 43      | 0.3153                              | 130.6438 | 3.0954              | 0.26455  | 0.12755             | -0.00798 | 0.03499     | -1.82284 | 7.91494  | 0.4855   | 0.23412 | -0.00521 | 0.00569 | 133.0199 | 10.8095   | 22.84    | 1.84   | 8.06  |
| 44      | 0.3156                              | 275.8823 | 66.83133            | 12.79631 | 3.58411             | 0.25585  | 0.43091     | 27.02519 | 45.68191 | 23.69359 | 6.69685 | -0.09695 | 0.06102 | 203.1388 | 136.52793 | 34.76    | 23.14  | 66.57 |
| 45      | 0.317                               | 181.8266 | 11.93696            | 7.86567  | 0.59181             | 0.1988   | 0.05736     | 31.95801 | 9.08021  | 14.49616 | 1.09804 | -0.00386 | 0.0093  | 124.3885 | 18.52569  | 21.36    | 3.16   | 14.79 |
| 46      | 0.3178                              | 145.3339 | 13.80268            | 11.41639 | 1.28486             | 0.05013  | 0.12399     | 9.54657  | 25.19758 | 21.11776 | 2.39602 | -0.01538 | 0.0165  | 132.5011 | 39.03287  | 22.75    | 6.66   | 29.27 |
| 47      | 0.3309                              | 130.0696 | 1.43565             | 0.45305  | 0.02471             | 0.034    | 0.00635     | 7.69469  | 1.44083  | 0.83155  | 0.04536 | 0.00182  | 0.00092 | 120.0971 | 2.29756   | 20.63    | 0.39   | 1.89  |
| 48      | 0.335                               | 144.5727 | 2.32904             | 2.42488  | 0.10301             | 0.00675  | 0.02183     | 1.24175  | 4.46276  | 4.45695  | 0.18966 | 0.02364  | 0.0035  | 142.9931 | 6.86161   | 24.54    | 1.17   | 4.77  |
| 49      | 0.3374                              | 222.9923 | 12.5053             | 2.33775  | 0.35462             | 0.28317  | 0.02503     | 37.33559 | 2.56585  | 9.64624  | 0.65511 | 0.0206   | 0.01054 | 140.237  | 7.76695   | 24.07    | 1.67   | 6.94  |
| 50      | 0.3417                              | 441.2033 | 10.48473            | 0.47487  | 0.06216             | 0.14675  | 0.0132      | 9.8206   | 0.85257  | 0.87162  | 0.11414 | 0.00826  | 0.00335 | 397.9812 | 10.18443  | 67.48    | 1.69   | 2.50  |
| 51      | 0.352                               | 142.0374 | 1.84928             | 0.72119  | 0.0411              | 0.00457  | 0.00628     | 0.9088   | 1.30743  | 1.32397  | 0.0755  | 0.00127  | 0.00133 | 140.7889 | 2.61085   | 24.16    | 0.45   | 1.86  |
| 52      | 0.3799                              | 160.3359 | 1.09829             | 0.12451  | 0.01163             | 0.10735  | 0.00257     | 19.78181 | 0.45496  | 0.22848  | 0.02135 | 0.0566   | 0.00088 | 128.606  | 1.14737   | 22.08    | 0.2    | 0.91  |
| 53      | 0.4061                              | 141.4723 | 1.24505             | 0.35288  | 0.01148             | 0.00557  | 0.00241     | 1.14362  | 0.50406  | 0.64765  | 0.02108 | 0.00447  | 0.00061 | 139.8599 | 1.4231    | 24       | 0.24   | 1.00  |
| 54      | 0.411                               | 128.9748 | 4.35996             | 1.41585  | 0.07583             | 0.02101  | 0.01365     | 4.72473  | 3.12281  | 2.60049  | 0.13942 | 0.10267  | 0.00511 | 122.9758 | 5.7947    | 21.12    | 0.99   | 4.69  |
| 55      | 0.4179                              | 157.7237 | 2.10218             | 0.40225  | 0.04218             | 0.15419  | 0.0143      | 28.87153 | 2.65385  | 0.73829  | 0.07744 | 0.05009  | 0.00249 | 112.1972 | 4.44959   | 19.28    | 0.76   | 3.94  |
| 56      | 0.4473                              |          |                     |          |                     |          |             |          |          |          |         |          |         |          |           |          |        |       |

|     |        |          |          |          |         |          |         |          |          |          |         |          |          |          |          |       |       |         |
|-----|--------|----------|----------|----------|---------|----------|---------|----------|----------|----------|---------|----------|----------|----------|----------|-------|-------|---------|
| 76  | 0.5746 | 205.0175 | 4.20686  | 0.49201  | 0.08174 | 0.26923  | 0.02407 | 38.79073 | 3.38011  | 0.90308  | 0.15009 | 0.00518  | 0.00356  | 125.5151 | 7.40151  | 21.56 | 1.26  | 5.84    |
| 77  | 0.581  | 139.0742 | 1.62186  | 0.17825  | 0.03719 | 0.03824  | 0.01214 | 8.11708  | 2.57788  | 0.32711  | 0.06826 | 0.00306  | 0.00251  | 127.7743 | 3.88335  | 21.94 | 0.66  | 3.01    |
| 78  | 0.5858 | 234.5665 | 5.55196  | 0.9189   | 0.05726 | 0.33887  | 0.01873 | 42.66258 | 2.13407  | 1.68716  | 0.1052  | -0.00034 | 0.00236  | 134.5647 | 5.94027  | 23.1  | 1.01  | 4.37    |
| 79  | 0.5876 | 182.2634 | 7.89441  | 7.39009  | 0.38383 | 0.10018  | 0.0441  | 15.91007 | 7.11632  | 13.63094 | 0.71168 | 0.01892  | 0.00886  | 154.0443 | 14.66333 | 26.42 | 2.5   | 9.46    |
| 80  | 0.5911 | 141.9522 | 5.37417  | 0.91057  | 0.10557 | -0.01896 | 0.02063 | -4.00101 | 4.29199  | 1.67185  | 0.19395 | 0.00536  | 0.00534  | 147.6958 | 8.27386  | 25.34 | 1.41  | 5.56    |
| 81  | 0.5924 | 259.8064 | 14.32044 | 5.52207  | 0.39971 | 0.56607  | 0.08774 | 64.21607 | 9.33013  | 10.1719  | 0.73917 | 0.06962  | 0.00801  | 93.3223  | 24.87701 | 16.05 | 4.26  | 26.54   |
| 82  | 0.6104 | 131.4083 | 1.60571  | 0.1861   | 0.01898 | 0.01104  | 0.00531 | 2.47066  | 1.19443  | 0.34152  | 0.03484 | 0.00338  | 0.00086  | 128.1495 | 2.2178   | 22.01 | 0.38  | 1.73    |
| 83  | 0.6112 | 108.6931 | 7.84253  | 5.25166  | 0.51608 | 0.05443  | 0.11187 | 14.40317 | 30.40362 | 9.67195  | 0.954   | 0.04862  | 0.0157   | 93.35877 | 33.84479 | 16.06 | 5.8   | 36.11   |
| 84  | 0.6116 | 159.6878 | 30.5169  | 3.71707  | 1.95003 | 0.29362  | 0.27265 | 54.15266 | 49.39069 | 6.83826  | 3.5969  | -0.01261 | 0.02958  | 73.39167 | 80.31718 | 12.64 | 13.78 | 109.02  |
| 85  | 0.616  | 1155.532 | 21.67007 | 0.12238  | 0.05602 | 3.51531  | 0.071   | 89.89713 | 0.68868  | 0.22457  | 0.10281 | 0.11633  | 0.00712  | 116.7491 | 8.27185  | 20.06 | 1.41  | 7.03    |
| 86  | 0.6256 | 136.3994 | 2.11838  | 0.40629  | 0.0353  | 0.01923  | 0.00924 | 4.14312  | 2.00106  | 0.7457   | 0.06481 | 0.00067  | 0.00117  | 130.7573 | 3.40344  | 22.45 | 0.58  | 2.58    |
| 87  | 0.635  | 142.4835 | 2.55397  | 0.02032  | 0.03779 | 0.02413  | 0.01102 | 5.00425  | 2.28514  | 0.03728  | 0.06934 | 0.03003  | 0.0026   | 135.327  | 4.06048  | 23.23 | 0.69  | 2.97    |
| 88  | 0.6365 | 137.5575 | 8.17614  | 1.37025  | 0.22547 | 0.12782  | 0.05798 | 27.38287 | 12.35122 | 2.51666  | 0.41451 | 0.01837  | 0.00792  | 99.96546 | 18.01829 | 17.19 | 3.08  | 17.92   |
| 89  | 0.6379 | 1095.385 | 58.71538 | 9.81899  | 0.60423 | 3.25023  | 0.18701 | 87.60944 | 1.83921  | 18.14229 | 0.12422 | 0.1508   | 0.01146  | 136.6685 | 21.59457 | 23.46 | 3.68  | 15.69   |
| 90  | 0.6431 | 150.5694 | 3.45952  | 0.67006  | 0.0639  | 0.03079  | 0.01263 | 6.00793  | 2.47483  | 1.23006  | 0.11735 | 0.00929  | 0.00199  | 141.5623 | 4.94935  | 24.29 | 0.84  | 3.46    |
| 91  | 0.659  | 142.3351 | 1.8536   | 0.07499  | 0.02382 | 0.06486  | 0.00453 | 13.46439 | 0.92507  | 0.1376   | 0.04371 | 0.03941  | 0.0013   | 123.1514 | 2.08042  | 21.15 | 0.36  | 1.70    |
| 92  | 0.6604 | 120.2114 | 5.64902  | 1.19584  | 0.13873 | 0.09187  | 0.04623 | -22.6715 | 11.31755 | 2.19606  | 0.25499 | 0.02345  | 0.00817  | 147.5533 | 15.27562 | 25.31 | 2.6   | 10.27   |
| 93  | 0.672  | 135.5712 | 1.2479   | 0.00768  | 0.02823 | 0.00804  | 0.0051  | 1.75285  | 1.11171  | 0.0141   | 0.0518  | 0.00359  | 0.00089  | 133.1663 | 1.94295  | 22.86 | 0.33  | 1.44    |
| 94  | 0.6788 | 112.5179 | 2.09857  | 0.00446  | 0.05973 | 0.18762  | 0.01044 | 49.28721 | 2.58853  | 0.00819  | 0.10959 | 0.00148  | 0.0024   | 57.04606 | 3.10466  | 9.83  | 0.53  | 5.39    |
| 95  | 0.6839 | 130.9981 | 2.7631   | 0.00036  | 0.04643 | -0.00949 | 0.00924 | -2.14148 | 2.08394  | 0.00066  | 0.0852  | 0.00431  | 0.00201  | 133.7731 | 3.92537  | 22.97 | 0.67  | 2.92    |
| 96  | 0.6851 | 147.6375 | 9.95025  | 11.09485 | 0.87883 | -0.00343 | 0.0423  | -1.30703 | 8.46786  | 20.51829 | 1.6381  | 0.03609  | 0.00922  | 150.7183 | 16.23446 | 25.85 | 2.76  | 10.68   |
| 97  | 0.6917 | 140.7168 | 1.83323  | 0.48205  | 0.03331 | 0.04126  | 0.0078  | 6.63828  | 1.63425  | 0.88479  | 0.06116 | 0.02627  | 0.0021   | 128.578  | 2.84609  | 22.08 | 0.49  | 2.22    |
| 98  | 0.6955 | 107.5697 | 2.4962   | 0.99382  | 0.09346 | 0.0437   | 0.01917 | 11.93196 | 5.25996  | 1.82481  | 0.17173 | 0.02636  | 0.00272  | 94.77493 | 6.07414  | 16.3  | 1.04  | 6.38    |
| 99  | 0.6974 | 200.0273 | 7.26747  | 2.84553  | 0.24689 | 0.33204  | 0.02875 | 48.94186 | 3.86217  | 5.23166  | 0.45484 | 0.02677  | 0.00408  | 102.3207 | 8.60082  | 17.59 | 1.47  | 8.36    |
| 100 | 0.703  | 136.9695 | 3.12699  | 0.1711   | 0.03963 | 0.0094   | 0.01194 | 2.01826  | 2.57696  | 0.31398  | 0.07274 | 0.00931  | 0.00136  | 134.1922 | 4.67439  | 23.04 | 0.8   | 3.47    |
| 101 | 0.704  | 154.5916 | 12.06168 | 13.69576 | 1.1202  | 0.15988  | 0.0653  | 29.83562 | 12.25562 | 25.37526 | 2.09576 | 0.036    | 0.01308  | 109.5068 | 20.98776 | 18.82 | 3.59  | 19.08   |
| 102 | 0.7051 | 162.94   | 7.33379  | 4.51946  | 0.31421 | 0.27589  | 0.06364 | 49.81412 | 11.32947 | 8.31913  | 0.58023 | 0.03316  | 0.00878  | 82.01982 | 18.89415 | 14.12 | 3.24  | 22.95   |
| 103 | 0.7248 | 155.632  | 0.95108  | 0.33737  | 0.02429 | 0.53053  | 0.00795 | 100.7332 | 1.39899  | 0.61917  | 0.04458 | 0.11956  | 0.00131  | -1.14117 | 2.17715  | -0.2  | 0.38  | -190.00 |
| 104 | 0.7283 | 154.7884 | 4.15531  | 0.42276  | 0.06007 | 0.08233  | 0.02262 | 15.69743 | 4.29875  | 0.77594  | 0.11029 | 0.00252  | 0.00248  | 130.5045 | 7.52347  | 22.41 | 1.28  | 5.71    |
| 105 | 0.7345 | 87.02673 | 2.12937  | 0.6882   | 0.06834 | 0.30268  | 0.01806 | 102.7466 | 5.60611  | 1.26337  | 0.12552 | 0.14157  | 0.0043   | -2.39059 | 4.87961  | -0.41 | 0.84  | -204.88 |
| 106 | 0.7512 | 252.017  | 4.11283  | 0.6262   | 0.02736 | 0.3476   | 0.00757 | 40.74163 | 0.59422  | 1.1495   | 0.05025 | 0.00603  | 0.00096  | 149.3896 | 2.87442  | 25.63 | 0.49  | 1.91    |
| 107 | 0.7732 | 516.7679 | 4.42681  | 0.154    | 0.01911 | 1.33596  | 0.01714 | 76.3952  | 0.73138  | 0.2826   | 0.03507 | 0.08796  | 0.00188  | 121.9883 | 3.92424  | 20.95 | 0.67  | 3.20    |
| 108 | 0.7788 | 130.4505 | 2.37738  | 0.37435  | 0.07855 | 0.0228   | 0.01043 | 5.14327  | 2.36083  | 0.68706  | 0.1442  | 0.02722  | 0.00193  | 123.7456 | 3.82041  | 21.25 | 0.65  | 3.06    |
| 109 | 0.7831 | 213.0499 | 5.10379  | 2.64213  | 0.11622 | 0.22534  | 0.01436 | 31.15646 | 1.84716  | 4.85701  | 0.21404 | 0.02239  | 0.00244  | 146.9248 | 5.29225  | 25.21 | 0.9   | 3.57    |
| 110 | 0.8011 | 134.0166 | 1.51558  | 0.16891  | 0.0146  | 0.0061   | 0.00297 | 1.33494  | 0.65467  | 0.30997  | 0.0268  | 0.00597  | 0.00067  | 132.214  | 1.73422  | 22.7  | 0.3   | 1.32    |
| 111 | 0.8022 | 165.2311 | 15.59823 | 7.63573  | 0.76782 | 0.24002  | 0.05336 | 42.55205 | 8.64474  | 14.08647 | 1.42415 | 0.02134  | 0.00925  | 95.41943 | 16.98432 | 16.41 | 2.91  | 17.73   |
| 112 | 0.8289 | 355.9678 | 2.74611  | 0.72546  | 0.01963 | 0.76407  | 0.01213 | 63.41623 | 0.88352  | 1.3318   | 0.03605 | 0.00493  | 0.00117  | 130.2823 | 3.31021  | 22.37 | 0.56  | 2.50    |
| 113 | 0.8751 | 129.7868 | 0.91032  | 0.04688  | 0.00048 | 0.00517  | 0.1071  | 0.3564   | 0.08603  | 0.01655  | 0.00089 | 0.00028  | 128.4416 | 1.013    | 22.06    | 0.17  | 0.77  |         |
| 114 | 0.8804 | 140.3755 | 2.31833  | 0.99628  | 0.06982 | 0.00936  | 0.01067 | 1.9125   | 2.246    | 1.82933  | 0.12828 | 0.01634  | 0.00166  | 137.7587 | 3.89082  | 23.65 | 0.66  | 2.79    |
| 115 | 0.8824 | 184.9792 | 7.28302  | -0.13696 | 0.135   | 0.14805  | 0.02406 | 23.66029 | 3.7302   | -0.25128 | 0.24766 | 0.00368  | 0.00441  | 141.1763 | 8.86161  | 24.23 | 1.51  | 6.23    |
| 116 | 0.8837 | 162.5979 | 10.7258  | 17.19261 | 1.16118 | 0.10902  | 0.04342 | 18.94513 | 7.78386  | 31.9338  | 2.1833  | 0.01267  | 0.01108  | 133.3893 | 15.60587 | 22.9  | 2.66  | 11.62   |
| 117 | 0.9095 | 150.6171 | 1.61406  | 0.04821  | 0.01012 | 0.07405  | 0.00428 | 14.52854 | 0.82482  | 0.08846  | 0.01857 | 0.0043   | 0.00042  | 128.7136 | 1.85724  | 22.1  | 0.32  | 1.45    |
| 118 | 0.9113 | 914.5775 | 38.1332  | 4.41725  | 0.28543 | 2.39041  | 0.10889 | 77.19689 | 1.43168  | 8.13041  | 0.52701 | 0.0391   | 0.00923  | 209.1979 | 15.81511 | 35.79 | 2.68  | 7.49    |
| 119 | 0.9229 | 184.9122 | 1.50619  | 0.54356  | 0.04112 | 0.19927  | 0.00902 | 31.82469 | 1.42134  | 0.99774  | 0.07551 | 0.02565  | 0.00132  | 126.0926 | 2.83225  | 21.66 | 0.48  | 2.22    |
| 120 | 0.9873 | 168.1098 | 0.93362  | 0.07199  | 0.00508 | 0.15267  | 0.00282 | 26.83661 | 0.47228  | 0.13209  | 0.00933 | 0.02062  | 0.00046  | 122.9793 | 1.04848  | 21.12 | 0.18  | 0.85    |
| 121 | 1      | 309.1085 | 2.08322  | 1.12998  | 0.03286 | 0.10378  | 0.11143 | 98.71083 | 0.89038  | 2.07501  | 0.06039 | 0.1006   | 0.0017   | 3.98775  | 2.75483  | 0.69  | 0.48  | 69.57   |

|            |          |         |         |         |         |         |          |         |         |        |         |         |         |         |      |      |      |
|------------|----------|---------|---------|---------|---------|---------|----------|---------|---------|--------|---------|---------|---------|---------|------|------|------|
| Integrated | 235.3245 | 0.34039 | 0.77105 | 0.00468 | 0.37119 | 0.00156 | 46.58934 | 0.18362 | 1.41554 | 0.0086 | 0.02175 | 0.00019 | 125.741 | 0.46963 | 21.6 | 0.13 | 0.60 |
|------------|----------|---------|---------|---------|---------|---------|----------|---------|---------|--------|---------|---------|---------|---------|------|------|------|

PTARMIGAN CREEK

Weighted average of J from standards = 5.988e-05 +/- -4.822e-07

| Grain # | Cumulative 39Ar meas. | 40Ar/39Ar +/- meas. | 37Ar/39Ar +/- meas. | 36Ar/39Ar +/- meas. | % Atm. 40Ar | +/-      | Ca/K    | +/-      | Cl/K     | +/-      | 40*/39K | +/-      | Age (Ma) | +/- (Ma) | %error   |        |       |        |
|---------|-----------------------|---------------------|---------------------|---------------------|-------------|----------|---------|----------|----------|----------|---------|----------|----------|----------|----------|--------|-------|--------|
| 1       | 0.0013                | 214.9031            | 9.08102             | 7.20604             | 0.56246     | 0.28596  | 0.139   | 39.04912 | 19.04396 | 13.28973 | 1.04263 | 0.03119  | 0.01448  | 131.6372 | 41.51177 | 22.6   | 7.08  | 31.33  |
| 2       | 0.0055                | 127.5796            | 2.76536             | 0.7528              | 0.13791     | -0.00683 | 0.04385 | -1.63011 | 10.1594  | 1.38202  | 0.25331 | 0.00808  | 0.00521  | 129.6981 | 13.26691 | 22.27  | 2.26  | 10.15  |
| 3       | 0.0126                | 147.9137            | 1.40595             | 0.56525             | 0.08331     | 0.04103  | 0.02569 | 8.16683  | 5.13336  | 1.03757  | 0.15298 | 0.01146  | 0.0026   | 135.8608 | 7.70397  | 23.32  | 1.31  | 5.62   |
| 4       | 0.0135                | 97.50844            | 8.50193             | 16.30191            | 1.5687      | -0.06006 | 0.20797 | -19.5863 | 63.02631 | 30.26014 | 2.94578 | 0.00898  | 0.0223   | 117.9293 | 63.01419 | 20.26  | 10.77 | 53.16  |
| 5       | 0.0182                | 132.4349            | 34.26731            | 3.77567             | 0.16527     | 3.9235   | 0.11231 | 87.52303 | 1.07781  | 6.94636  | 0.30487 | 0.04573  | 0.00482  | 165.6767 | 14.95443 | 28.4   | 2.54  | 8.94   |
| 6       | 0.0231                | 120.6019            | 2.52549             | 0.44303             | 0.12448     | -0.02366 | 0.03822 | -5.82806 | 9.36734  | 0.81316  | 0.22855 | 0.00365  | 0.00454  | 127.6392 | 11.60992 | 21.92  | 1.98  | 9.03   |
| 7       | 0.0237                | 34.96818            | 3.79137             | 7.74562             | 1.37827     | -0.10563 | 0.30096 | -91.1685 | 254.3749 | 14.29031 | 2.55683 | 0.07817  | 0.03476  | 67.15906 | 89.6507  | 11.57  | 15.39 | 133.02 |
| 8       | 0.0753                | 137.6737            | 0.81854             | 0.30522             | 0.01081     | 0.03298  | 0.00202 | 7.06305  | 0.43173  | 0.56015  | 0.01984 | 0.00037  | 0.00037  | 127.9498 | 0.967    | 21.97  | 0.17  | 0.77   |
| 9       | 0.083                 | 131.1401            | 0.71853             | 0.67173             | 0.03565     | 0.02677  | 0.01166 | 5.9906   | 2.62721  | 1.23311  | 0.06547 | 0.0052   | 0.00112  | 123.3146 | 3.51245  | 21.18  | 0.6   | 2.83   |
| 10      | 0.0891                | 140.8024            | 1.74631             | 0.73335             | 0.05347     | 0.03781  | 0.01231 | 7.89411  | 2.58265  | 1.3463   | 0.0982  | 0.00078  | 0.00156  | 129.7272 | 3.97879  | 22.28  | 0.68  | 3.05   |
| 11      | 0.1008                | 343.0257            | 2.79859             | 0.71317             | 0.03249     | 0.68829  | 0.01329 | 59.28091 | 1.04038  | 1.30922  | 0.05967 | 0.00232  | 0.00104  | 139.7352 | 3.75409  | 23.98  | 0.64  | 2.67   |
| 12      | 0.109                 | 137.0107            | 1.74675             | 1.72013             | 0.03992     | 0.0241   | 0.01001 | 5.09601  | 2.15855  | 3.16005  | 0.07343 | 0.00088  | 0.00189  | 130.1586 | 3.39594  | 22.35  | 0.58  | 2.60   |
| 13      | 0.1132                | 136.8963            | 3.03001             | 0.46724             | 0.06185     | 0.04239  | 0.01874 | 9.12443  | 4.04102  | 0.85761  | 0.11356 | 0.00878  | 0.00222  | 124.4194 | 6.18255  | 21.37  | 1.06  | 4.96   |
| 14      | 0.1261                | 130.8281            | 0.68044             | 0.0754              | 0.02675     | 0.01108  | 0.00488 | 2.49929  | 1.10271  | 0.13836  | 0.04909 | 0.00147  | 0.00061  | 127.5362 | 1.58821  | 21.9   | 0.27  | 1.23   |
| 15      | 0.1271                | 5158.437            | 572.68771           | 14.00732            | 1.57807     | 16.58243 | 1.85023 | 94.97023 | 1.06536  | 25.95828 | 2.95369 | 0.05743  | 0.01486  | 262.0482 | 62.81958 | 44.72  | 10.59 | 23.68  |
| 16      | 0.1351                | 166.9155            | 3.03404             | 2.50675             | 0.06483     | 0.01179  | 0.00838 | 1.9638   | 1.48335  | 4.60769  | 0.11938 | 0.00061  | 0.00141  | 163.8987 | 3.88097  | 28.1   | 0.66  | 2.35   |
| 17      | 0.1361                | 226.4115            | 13.52437            | 5.65394             | 0.43055     | 0.34334  | 0.06181 | 44.61089 | 7.61437  | 10.41579 | 0.79635 | 0.02921  | 0.01419  | 125.8936 | 18.88995 | 21.62  | 3.22  | 14.89  |
| 18      | 0.1411                | 664.2535            | 7.89855             | -0.07467            | 0.05576     | 0.091    | 0.01301 | 4.04954  | 0.57676  | -0.13699 | 0.1023  | 0.00393  | 0.00252  | 637.2922 | 8.49295  | 106.88 | 1.38  | 1.29   |
| 19      | 0.1462                | 129.4299            | 2.98682             | 3.15758             | 0.0988      | 0.05127  | 0.01317 | 11.50626 | 2.99488  | 5.80668  | 0.18209 | 0.03556  | 0.00225  | 114.7667 | 4.70697  | 19.72  | 0.8   | 4.06   |
| 20      | 0.1499                | 118.8024            | 2.13781             | 0.02644             | 0.04581     | -0.0223  | 0.01901 | -5.54964 | 4.77292  | 0.04852  | 0.08405 | 0.03579  | 0.00461  | 125.3665 | 6.05102  | 21.53  | 1.03  | 4.78   |
| 21      | 0.1557                | 122.9995            | 2.42181             | 0.56759             | 0.04247     | 0.00553  | 0.01149 | 1.29169  | 2.76021  | 1.04186  | 0.07798 | 0.00639  | 0.00202  | 121.4301 | 4.15398  | 20.86  | 0.71  | 3.40   |
| 22      | 0.1645                | 121.8817            | 2.3265              | 0.35635             | 0.04556     | 0.04602  | 0.01025 | 11.13697 | 2.47567  | 0.65402  | 0.08365 | 0.0016   | 0.00193  | 108.3086 | 3.65924  | 18.62  | 0.63  | 3.38   |
| 23      | 0.1772                | 127.8666            | 1.2752              | 0.06098             | 0.02427     | 0.00838  | 0.00679 | 1.93414  | 1.56944  | 0.11189  | 0.04453 | 0.00002  | 0.00065  | 125.3698 | 2.36494  | 21.53  | 0.4   | 1.86   |
| 24      | 0.1926                | 136.5967            | 2.06858             | 1.81539             | 0.04473     | 0.04045  | 0.00624 | 8.64369  | 1.34403  | 3.33527  | 0.08228 | 0.01493  | 0.00072  | 124.9228 | 2.6407   | 21.64  | 0.45  | 2.10   |
| 25      | 0.1965                | 147.2485            | 2.9298              | 0.56584             | 0.09674     | 0.12391  | 0.02126 | 24.83944 | 4.23837  | 1.03865  | 0.17766 | 0.02297  | 0.00223  | 110.6947 | 6.62138  | 19.02  | 1.13  | 5.94   |
| 26      | 0.2051                | 133.6619            | 1.16661             | 0.51088             | 0.04618     | 0.01786  | 0.01074 | 3.91771  | 2.37478  | 0.93774  | 0.0848  | -0.00001 | 0.00131  | 128.4433 | 3.3674   | 22.06  | 0.57  | 2.58   |
| 27      | 0.2081                | 152.3628            | 5.58818             | 2.21291             | 0.15889     | 0.08512  | 0.02666 | 16.39117 | 1.53673  | 4.06674  | 0.29245 | 0.00715  | 0.00308  | 127.5634 | 9.13327  | 21.91  | 1.56  | 7.12   |
| 28      | 0.2134                | 179.5126            | 4.99238             | 0.91097             | 0.07269     | 0.04537  | 0.0174  | 7.42763  | 2.8569   | 1.67257  | 0.13354 | 0.02632  | 0.00267  | 166.2586 | 6.91177  | 28.5   | 1.18  | 4.14   |
| 29      | 0.2196                | 129.8789            | 2.18666             | 1.12972             | 0.06289     | 0.02545  | 0.01175 | 5.71939  | 2.67338  | 2.07453  | 0.11558 | 0.01416  | 0.00261  | 122.5204 | 4.04266  | 21.05  | 0.69  | 3.28   |
| 30      | 0.2245                | 186.7651            | 3.56572             | 2.96706             | 0.12194     | 0.21595  | 0.01679 | 34.04223 | 2.57699  | 5.45558  | 0.22469 | 0.01727  | 0.00386  | 123.4252 | 5.37335  | 21.2   | 0.92  | 4.34   |
| 31      | 0.2264                | 138.4185            | 6.66656             | 1.73938             | 0.20456     | 0.0283   | 0.02626 | 5.9402   | 6.60047  | 3.19546  | 0.37626 | 0.03625  | 0.00859  | 130.3283 | 9.98777  | 22.38  | 1.7   | 7.60   |
| 32      | 0.2294                | 126.3333            | 3.92066             | 0.62638             | 0.10737     | -0.01678 | 0.01974 | -3.96586 | 4.61419  | 1.14984  | 0.19718 | 0.00216  | 0.00572  | 131.4228 | 7.11756  | 22.56  | 1.21  | 5.36   |
| 33      | 0.2308                | 221.7966            | 9.37309             | 6.31695             | 0.33576     | 0.35624  | 0.0659  | 47.23296 | 8.55081  | 11.64268 | 0.62161 | 0.02069  | 0.01088  | 117.5443 | 19.69694 | 20.2   | 3.37  | 16.68  |
| 34      | 0.2323                | 175.5809            | 6.53887             | 5.41392             | 0.33445     | 0.20607  | 0.04743 | 34.43228 | 7.88122  | 9.97192  | 0.6184  | 0.01331  | 0.01052  | 115.5468 | 14.55175 | 19.85  | 2.49  | 12.54  |
| 35      | 0.2336                | 142.7494            | 5.28337             | 5.54362             | 0.29988     | 0.08357  | 0.04782 | 16.98323 | 9.88143  | 10.21177 | 0.55457 | 0.05621  | 0.01317  | 118.947  | 14.83586 | 20.43  | 2.53  | 12.38  |
| 36      | 0.2346                | 171.4539            | 15.48603            | 6.68654             | 0.67576     | 0.14864  | 0.06841 | 25.30132 | 11.56354 | 12.32709 | 1.25172 | 0.02266  | 0.00897  | 128.6593 | 23.09268 | 22.09  | 3.94  | 17.84  |
| 37      | 0.2376                | 125.4368            | 3.56372             | 0.34017             | 0.08704     | -0.02815 | 0.01718 | -6.6565  | 4.04414  | 0.62431  | 0.15979 | 0.01261  | 0.0044   | 133.687  | 6.38891  | 22.97  | 1.08  | 4.07   |

|    |        |          |          |          |         |          |          |          |          |          |         |          |         |          |           |       |       |          |
|----|--------|----------|----------|----------|---------|----------|----------|----------|----------|----------|---------|----------|---------|----------|-----------|-------|-------|----------|
| 38 | 0.2402 | 192.8483 | 7.54059  | 7.24141  | 0.31864 | 0.21759  | 0.02221  | 33.03614 | 3.14491  | 13.3553  | 0.59069 | 0.0166   | 0.00509 | 129.7826 | 7.95297   | 22.28 | 1.36  | 6.10     |
| 39 | 0.2621 | 123.5447 | 1.2289   | 0.24432  | 0.01372 | 0.0023   | 0.00353  | 0.53374  | 0.84393  | 0.44837  | 0.02519 | 0.00349  | 0.00048 | 122.877  | 1.60699   | 21.11 | 0.27  | 1.28     |
| 40 | 0.2661 | 141.9603 | 3.85985  | 1.9557   | 0.0999  | 0.06118  | 0.02004  | 12.62427 | 4.15853  | 3.59341  | 0.18381 | 0.00837  | 0.00369 | 124.1845 | 6.81049   | 21.33 | 1.16  | 5.44     |
| 41 | 0.276  | 156.2149 | 2.83081  | 0.43507  | 0.03244 | 0.11274  | 0.00617  | 21.30633 | 1.10237  | 0.79854  | 0.05956 | 0.02503  | 0.00173 | 122.9456 | 2.82114   | 21.12 | 0.48  | 2.27     |
| 42 | 0.2804 | 154.9699 | 2.9306   | 1.87584  | 0.07841 | 0.01473  | 0.01376  | 2.71026  | 2.62327  | 3.44647  | 0.14425 | 0.0116   | 0.00222 | 150.9409 | 4.97385   | 25.89 | 0.85  | 3.28     |
| 43 | 0.286  | 152.5013 | 3.14275  | 1.64654  | 0.07222 | 0.09318  | 0.0148   | 17.96936 | 2.84416  | 3.02469  | 0.13283 | 0.0959   | 0.0031  | 125.2191 | 5.05484   | 21.51 | 0.86  | 4.00     |
| 44 | 0.2915 | 281.8509 | 4.09437  | 2.87112  | 0.08784 | 0.46823  | 0.02051  | 49.01136 | 2.03014  | 5.27882  | 0.16184 | 0.05487  | 0.00243 | 143.9888 | 6.10889   | 24.71 | 1.04  | 4.21     |
| 45 | 0.2916 | 228.4188 | 79.26433 | 10.77478 | 4.77843 | -0.54213 | 0.46977  | -70.5315 | 55.71835 | 19.92182 | 8.90273 | 0.04255  | 0.06686 | 392.4621 | 187.73874 | 66.56 | 31.26 | 46.97    |
| 46 | 0.2946 | 142.957  | 4.06455  | 0.40121  | 0.1171  | 0.04823  | 0.03422  | 9.94788  | 7.06962  | 0.73637  | 0.21498 | 0.04067  | 0.00596 | 128.7455 | 10.75133  | 22.11 | 1.83  | 8.28     |
| 47 | 0.2984 | 138.5348 | 2.5202   | 0.31845  | 0.09066 | 0.02319  | 0.01624  | 4.92923  | 3.46325  | 0.58444  | 0.16642 | 0.02365  | 0.00253 | 131.7075 | 5.3636    | 22.61 | 0.92  | 4.07     |
| 48 | 0.3    | 127.3493 | 7.4298   | 0.90052  | 0.21828 | 0.00435  | 0.04204  | 0.95136  | 9.7571   | 1.65339  | 0.40103 | 0.03328  | 0.01096 | 126.1886 | 14.45065  | 21.67 | 2.47  | 11.40    |
| 49 | 0.311  | 128.3216 | 1.96648  | 0.27924  | 0.04187 | -0.00347 | 0.00537  | -0.81669 | 1.23631  | 0.51246  | 0.07686 | 0.00488  | 0.00113 | 129.3652 | 2.53965   | 22.21 | 0.43  | 1.94     |
| 50 | 0.3165 | 165.7761 | 2.85443  | 1.67413  | 0.08616 | 0.16355  | 0.01297  | 29.07496 | 2.25812  | 3.07543  | 0.15846 | 0.02073  | 0.00252 | 117.6949 | 4.26289   | 20.22 | 0.73  | 3.61     |
| 51 | 0.3244 | 142.4128 | 3.12892  | 1.42398  | 0.05903 | 0.05127  | 0.00933  | 10.5575  | 1.92201  | 2.61543  | 0.10852 | 0.01713  | 0.0018  | 127.4792 | 3.92123   | 21.89 | 0.67  | 3.06     |
| 52 | 0.3325 | 148.0365 | 2.99357  | 0.95811  | 0.05158 | 0.03352  | 0.0079   | 6.63913  | 1.57244  | 1.7592   | 0.09477 | 0.00513  | 0.00172 | 138.274  | 3.64165   | 23.73 | 0.62  | 2.61     |
| 53 | 0.3342 | 185.9401 | 11.42529 | 3.12963  | 0.29097 | 0.20937  | 0.04831  | 33.14014 | 7.40201  | 5.75517  | 0.53626 | 0.01984  | 0.00932 | 124.5748 | 15.78561  | 21.4  | 2.7   | 12.62    |
| 54 | 0.3358 | 169.9951 | 11.37613 | 5.52127  | 0.44964 | 0.25939  | 0.05242  | 44.82925 | 8.60272  | 10.17043 | 0.8315  | 0.02611  | 0.00875 | 94.13832 | 15.98913  | 16.19 | 2.74  | 16.92    |
| 55 | 0.3562 | 128.8333 | 1.22131  | 0.78272  | 0.02103 | 0.02019  | 0.00365  | 4.58107  | 0.83533  | 1.43698  | 0.03863 | 0.00667  | 0.00094 | 122.971  | 1.58818   | 21.12 | 0.27  | 1.28     |
| 56 | 0.3572 | 122.8967 | 12.58766 | 10.04972 | 1.09311 | 0.07823  | 0.0949   | 18.14123 | 22.74308 | 18.57166 | 2.03448 | 0.02793  | 0.01384 | 101.2965 | 30.02373  | 17.42 | 5.14  | 29.51    |
| 57 | 0.3586 | 126.149  | 7.33646  | 4.69831  | 0.38086 | -0.05242 | 0.08028  | -12.5883 | 18.79722 | 8.64946  | 0.70348 | 0.03094  | 0.0082  | 142.4683 | 25.19544  | 24.45 | 4.29  | 17.55    |
| 58 | 0.3671 | 131.7711 | 1.85187  | 0.63204  | 0.05878 | -0.0131  | 0.01182  | -2.97877 | 2.65033  | 1.16023  | 0.10795 | 0.00543  | 0.00144 | 135.7262 | 3.98044   | 23.3  | 0.68  | 2.92     |
| 59 | 0.3783 | 130.9121 | 1.3696   | 0.12362  | 0.03329 | -0.00359 | 0.00899  | -0.81763 | 2.03062  | 0.22685  | 0.06109 | 0.00396  | 0.00124 | 131.964  | 2.99519   | 22.66 | 0.51  | 2.25     |
| 60 | 0.3843 | 960.2984 | 26.89521 | 1.61774  | 0.0795  | 3.11773  | 0.09492  | 95.92699 | 1.1529   | 2.97173  | 0.1462  | 0.01569  | 0.00324 | 39.15662 | 11.14107  | 6.75  | 1.92  | 28.44    |
| 61 | 0.3847 | 146.7591 | 29.54375 | 3.50395  | 1.00737 | -0.00516 | 0.22099  | -1.23651 | 44.50532 | 6.44522  | 1.85756 | 0.01816  | 0.02692 | 148.9123 | 72.03483  | 25.55 | 12.27 | 48.02    |
| 62 | 0.3908 | 137.7982 | 2.26117  | 0.43375  | 0.07177 | -0.03326 | 0.01472  | -7.15981 | 3.15534  | 0.79612  | 0.13176 | 0.00556  | 0.00221 | 147.6777 | 4.9772    | 25.34 | 0.85  | 3.35     |
| 63 | 0.3916 | 94.12622 | 7.64008  | 4.04287  | 0.63632 | -0.18646 | 0.10177  | -58.9095 | 31.61418 | 7.43935  | 1.17425 | 0.02776  | 0.01215 | 149.9566 | 32.2104   | 25.72 | 5.49  | 21.35    |
| 64 | 0.3939 | 162.3886 | 4.99324  | 4.90023  | 0.22961 | 0.14299  | 0.02147  | 25.77575 | 3.82492  | 9.02247  | 0.42423 | 0.01912  | 0.00476 | 120.9282 | 7.26698   | 20.77 | 1.24  | 5.97     |
| 65 | 0.3974 | 125.5199 | 7.16192  | 2.63041  | 0.13485 | 0.03776  | 0.01488  | 8.71876  | 3.50144  | 4.83541  | 0.24836 | 0.03318  | 0.00426 | 114.7623 | 4.66221   | 19.72 | 0.8   | 4.06     |
| 66 | 0.4041 | 169.6646 | 2.07039  | 0.38485  | 0.06252 | 0.13494  | 0.01359  | 23.48834 | 2.35043  | 0.70634  | 0.11478 | 0.00628  | 0.00158 | 129.8257 | 4.29326   | 22.29 | 0.73  | 3.28     |
| 67 | 0.4093 | 149.2171 | 2.53227  | 1.9651   | 0.08846 | 0.11451  | 0.00902  | 22.57351 | 1.74613  | 3.6107   | 0.16276 | 0.01001  | 0.00245 | 115.6712 | 3.27107   | 19.88 | 0.56  | 2.82     |
| 68 | 0.4278 | 117.6544 | 0.53624  | 0.84662  | 0.02859 | 0.01721  | 0.00223  | 4.26392  | 0.55928  | 1.55436  | 0.05252 | 0.02091  | 0.00066 | 112.6767 | 0.8376    | 19.36 | 0.14  | 0.72     |
| 69 | 0.4287 | 178.7452 | 7.4749   | 19.71044 | 0.98457 | 0.23985  | 0.0457   | 38.74853 | 7.37442  | 36.67647 | 1.85792 | 0.01375  | 0.01177 | 111.0114 | 14.17666  | 19.08 | 2.42  | 12.68    |
| 70 | 0.4431 | 123.7431 | 1.26024  | 0.02722  | 0.02475 | 0.00319  | 0.179891 | 7.06077  | 0.04994  | 0.04542  | 0.1763  | 0.0014   | 0.0121  | 124.4902 | 1.55535   | 20.87 | 0.27  | 1.29     |
| 71 | 0.4468 | 126.3293 | 2.88875  | 1.24102  | 0.06846 | 0.05408  | 0.01744  | 12.57199 | 4.07147  | 2.2791   | 0.12583 | 0.00948  | 0.00342 | 110.5181 | 5.73698   | 18.99 | 0.98  | 5.16     |
| 72 | 0.448  | 126.1687 | 7.13258  | 2.29369  | 0.23716 | 0.08475  | 0.05321  | 19.70388 | 12.41622 | 4.21543  | 0.43657 | 0.01879  | 0.00993 | 101.4491 | 16.70895  | 17.44 | 2.86  | 16.40    |
| 73 | 0.4497 | 194.8352 | 14.02655 | 4.24312  | 0.2605  | 0.62902  | 0.04665  | 62.93113 | 3.59003  | 7.80895  | 0.48086 | 0.03372  | 0.00847 | 109.6096 | 11.84005  | 18.84 | 2.02  | 10.72    |
| 74 | 0.4569 | 126.427  | 2.58602  | 4.20414  | 0.11101 | 0.03767  | 0.00889  | 8.53173  | 2.06975  | 7.73699  | 0.20491 | 0.01678  | 0.00221 | 115.9578 | 3.54274   | 19.92 | 0.61  | 3.06     |
| 75 | 0.4613 | 247.8836 | 5.10947  | 3.84934  | 0.12404 | 0.50597  | 0.01852  | 60.19494 | 1.82819  | 7.08227  | 0.22884 | 0.02437  | 0.00322 | 98.92738 | 4.98817   | 17.01 | 0.85  | 5.00     |
| 76 | 0.4643 | 213.9513 | 7.12515  | 6.08972  | 0.26875 | 0.33041  | 0.02421  | 45.4071  | 2.98149  | 11.22206 | 0.49739 | 0.02626  | 0.00452 | 117.2905 | 7.51652   | 20.15 | 1.28  | 6.35     |
| 77 | 0.4666 | 130.5236 | 4.1802   | 4.45864  | 0.20911 | 0.04581  | 0.02464  | 10.09143 | 5.5702   | 8.20683  | 0.38612 | -0.00097 | 0.00482 | 117.6959 | 8.21587   | 20.22 | 1.4   | 6.92     |
| 78 | 0.488  | 128.092  | 0.87712  | 0.25103  | 0.00983 | 0.03043  | 0.25229  | 0.79157  | 0.46069  | 0.03573  | 0.0018  | 0.00076  | 0.00125 | 132.864  | 2.13264   | 21.5  | 0.23  | 1.07     |
| 79 | 0.5036 | 132.4004 | 1.57621  | 0.75253  | 0.02571 | 0.02643  | 0.00418  | 8.58247  | 0.93056  | 1.38153  | 0.04723 | 0.00446  | 0.00125 | 124.6901 | 1.93055   | 21.42 | 0.33  | 1.54     |
| 80 | 0.5184 | 21.10884 | 0.15453  | 0.80356  | 0.02765 | 0.06635  | 0.00366  | 92.7006  | 5.10657  | 1.47525  | 0.05079 | 0.12073  | 0.00236 | 1.53953  | 1.07733   | 0.27  | 0.19  | 70.37    |
| 81 | 0.5223 | 123.7895 | 3.85116  | 0.08098  | 0.08876 | 0.01197  | 0.01653  | 2.85332  | 3.9455   | 0.1486   | 0.16288 | 0.00649  | 0.00462 | 120.2355 | 6.15222   | 20.65 | 1.05  | 5.08     |
| 82 | 0.5257 | 220.9579 | 4.10719  | 2.73459  | 0.11064 | 0.33633  | 0.02522  | 44.88342 | 3.26924  | 5.0273   | 0.20379 | 0.01066  | 0.00502 | 122.0037 | 7.58927   | 20.96 | 1.3   | 6.20     |
| 83 | 0.53   | 129.4303 | 2.95001  | 2.61361  | 0.13112 | 0.03203  | 0.01469  | 7.14683  | 3.34982  | 4.80448  | 0.24148 | 0.01845  | 0.00445 | 120.3748 | 5.14045   | 20.68 | 0.88  | 4.26     |
| 84 | 0.5332 | 149.5934 | 3.73725  | 0.88004  | 0.11011 | 0.12852  | 0.02114  | 25.34387 | 4.12842  | 1.61576  | 0.20229 | 0.04758  | 0.00561 | 111.728  | 6.78439   | 19.2  | 1.16  | 6.04     |
| 85 | 0.5344 | 163.6852 | 5.37982  | 2.46624  | 0.22436 | 0.04029  | 0.04382  | 7.15134  | 7.90956  | 4.53311  | 0.4131  | 0.0183   | 0.00596 | 152.2171 | 13.90334  | 26.11 | 2.37  | 9.08     |
| 86 | 0.537  | 129.1691 | 3.97183  | 3.70144  | 0.19414 | -0.00258 | 0.01352  | -0.82569 | 3.09463  | 6.80943  | 0.35809 | 0.01511  | 0.0026  | 130.547  | 5.67969   | 22.42 | 0.97  | 4.33     |
| 87 | 0.5396 | 106.0406 | 3.69611  | 3.29138  | 0.18167 | 0.00673  | 0.01352  | 1.61908  | 3.76705  | 6.0533   | 0.3349  | 0.02821  | 0.00285 | 104.5375 | 5.41947   | 17.97 | 0.93  | 5.18     |
| 88 | 0.5421 | 1294.655 | 46.49517 | 13.49229 | 0.52813 | 3.96085  | 0.14826  | 90.32104 | 0.95796  | 24.99466 | 0.98777 | 0.16198  | 0.00971 | 126.5117 | 13.3411   | 21.73 | 2.28  | 10.49    |
| 89 | 0.5519 | 131.0138 | 1.62998  | 0.93841  | 0.04539 | -0.00607 | 0.00394  | -1.42866 | 0.88777  | 1.72299  | 0.0834  | 0.00528  | 0.00113 | 132.9435 | 2.02317   | 22.82 | 0.35  | 1.53     |
| 90 | 0.5772 | 318.3322 | 2.21683  | 1.52965  | 0.02329 | 0.65679  | 0.0093   | 60.93465 | 0.75604  | 2.80974  | 0.04283 | 0.01588  | 0.0007  | 124.4805 | 2.5697    | 21.38 | 0.44  | 2.06     |
| 91 | 0.5797 | 132.0838 | 3.60687  | 11.26976 | 0.01225 | 0.019    | 2.03668  | 4.25135  | 20.84436 | 0.67845  | 0.01756 | 0.0052   | 0.00340 | 120.4027 | 6.70125   | 22.39 | 1.14  | 5.09     |
| 92 | 0.5931 | 53.1672  | 0.85069  | 0.88463  | 0.04129 | 0.18067  | 0.00684  | 100.3325 | 3.45957  | 1.62419  | 0.07585 | 0.09599  | 0.0024  | -0.17678 | 1.83947   | -0.03 | 0.32  | -1066.67 |
| 93 | 0.6425 | 223.2964 | 1.13513  | 0.06814  | 0.00677 | 0.23535  | 0.00374  | 31.14649 | 0.46916  | 0.12503  | 0.01243 | 0.00093  | 0.00036 | 153.7344 | 1.30851   | 26.37 | 0.22  |          |

| 39Ar |        | meas.    | meas.     | meas.    | 40Ar    |          |          |          |          |          |          |          |          |          |           |         | (Ma)     | (Ma)     |  |  |
|------|--------|----------|-----------|----------|---------|----------|----------|----------|----------|----------|----------|----------|----------|----------|-----------|---------|----------|----------|--|--|
| 1    | 0.0035 | 161.034  | 3.23825   | 1.26593  | 0.05475 | 0.05826  | 0.01201  | 10.62781 | 2.19378  | 2.32488  | 0.10064  | 0.01174  | 0.00133  | 144.0218 | 4.57599   | 24.71   | 0.78     | 3.16     |  |  |
| 2    | 0.0046 | 286.43   | 11.30277  | 2.62709  | 0.14891 | 0.40136  | 0.03864  | 41.33598 | 3.63877  | 4.82932  | 0.27425  | 0.02468  | 0.00509  | 168.3263 | 12.39045  | 28.85   | 2.11     | 7.31     |  |  |
| 3    | 0.0056 | 313.4268 | 10.03385  | 2.59654  | 0.17615 | 0.50906  | 0.0437   | 47.9306  | 3.82757  | 4.77304  | 0.3244   | 0.0265   | 0.00564  | 163.4838 | 13.12522  | 28.03   | 2.23     | 7.96     |  |  |
| 4    | 0.1169 | 377.6067 | 0.93381   | 0.05146  | 0.00231 | 0.02261  | 0.00071  | 1.76847  | 0.05563  | 0.09442  | 0.00423  | 0.00103  | 0.00009  | 370.9132 | 0.94142   | 62.97   | 0.16     | 0.25     |  |  |
| 5    | 0.1201 | 675.4121 | 17.61952  | 0.03478  | 0.05045 | 0.14283  | 0.01602  | 6.2488   | 0.68164  | 0.06382  | 0.09256  | 0.00506  | 0.00157  | 633.1946 | 17.15129  | 106.21  | 2.79     | 2.63     |  |  |
| 6    | 0.1316 | 150.3167 | 1.54001   | 0.76314  | 0.01656 | 0.07402  | 0.00439  | 14.51149 | 0.85122  | 1.40101  | 0.03042  | 0.00589  | 0.00078  | 128.5474 | 1.84189   | 22.07   | 0.31     | 1.40     |  |  |
| 7    | 0.1356 | 293.3836 | 4.10161   | 2.78952  | 0.06881 | 0.44363  | 0.01517  | 44.60949 | 1.39799  | 5.1285   | 0.12675  | 0.01778  | 0.00194  | 162.811  | 4.71225   | 27.91   | 0.8      | 2.87     |  |  |
| 8    | 0.1371 | 127.3248 | 3.35456   | 2.30878  | 0.14013 | 0.02719  | 0.02492  | 6.16253  | 5.78315  | 4.24321  | 0.25796  | 0.0052   | 0.00119  | 119.6456 | 8.02268   | 20.55   | 1.37     | 6.67     |  |  |
| 9    | 0.1615 | 268.2474 | 1.62035   | 0.18669  | 0.00646 | 0.06764  | 0.00195  | 7.4466   | 0.21012  | 0.34259  | 0.01186  | 0.00251  | 0.00042  | 248.2773 | 1.6029    | 42.39   | 0.27     | 0.64     |  |  |
| 10   | 0.1632 | 822.3305 | 19.01846  | 5.73487  | 0.18996 | 2.21594  | 0.06421  | 79.57413 | 1.39666  | 10.56548 | 0.35138  | 0.04269  | 0.00717  | 168.6452 | 12.19203  | 28.9    | 2.07     | 7.16     |  |  |
| 11   | 0.1668 | 1685.734 | 20.22208  | 0.62633  | 0.0475  | 0.67937  | 0.02456  | 11.90621 | 0.40611  | 1.14974  | 0.08723  | 0.00482  | 0.00225  | 1485.658 | 19.10242  | 239.97  | 2.89     | 1.20     |  |  |
| 12   | 0.1668 | 1685533  | 964642455 | -148.998 | 85323.2 | 3826.7   | 2190048  | 67.08871 | 12.76107 | -247.362 | 128165.1 | 9.94797  | 5695.884 | 501916.7 | 259904192 | 7017.79 | 914153.1 | 13026.22 |  |  |
| 13   | 0.1713 | 136.6619 | 1.78124   | 0.80077  | 0.03493 | 0.03172  | 0.00609  | 6.81182  | 1.31474  | 1.47014  | 0.06416  | 0.02418  | 0.0021   | 127.3971 | 2.4494    | 21.88   | 0.42     | 1.92     |  |  |
| 14   | 0.1743 | 153.539  | 2.25229   | 1.6644   | 0.06678 | 0.06614  | 0.01274  | 12.64156 | 2.44534  | 3.05755  | 0.12283  | 0.02126  | 0.00217  | 134.2612 | 4.24653   | 23.05   | 0.72     | 3.12     |  |  |
| 15   | 0.1836 | 186.8124 | 1.39432   | 2.00103  | 0.02414 | 0.11712  | 0.00491  | 18.44049 | 0.76703  | 3.67682  | 0.04441  | 0.0097   | 0.00091  | 152.5546 | 1.84727   | 26.17   | 0.31     | 1.18     |  |  |
| 16   | 0.1855 | 157.2093 | 3.81764   | 0.9821   | 0.0864  | 0.02862  | 0.01904  | 5.32831  | 3.77796  | 1.80327  | 0.15875  | 0.01348  | 0.00464  | 148.9079 | 6.693     | 25.55   | 1.14     | 4.46     |  |  |
| 17   | 0.1983 | 166.083  | 0.8781    | 4.06001  | 0.04507 | 0.03778  | 0.00278  | 6.52225  | 0.49391  | 7.47097  | 0.08316  | 0.01747  | 0.00077  | 155.6693 | 1.16923   | 26.7    | 0.2      | 0.75     |  |  |
| 18   | 0.1995 | 180.803  | 5.60701   | 3.9162   | 0.1871  | 0.0882   | 0.03863  | 14.23841 | 6.29976  | 7.20561  | 0.34521  | 0.01507  | 0.00456  | 155.4641 | 12.40435  | 26.66   | 2.11     | 7.91     |  |  |
| 19   | 0.2032 | 136.0328 | 2.68133   | 2.40373  | 0.0653  | -0.00934 | 0.01188  | -2.17602 | 2.57988  | 4.41801  | 0.12022  | 0.00416  | 0.00355  | 139.1989 | 4.46179   | 23.89   | 0.76     | 3.18     |  |  |
| 20   | 0.2046 | 225.1212 | 65.6249   | 0.01296  | 0.08754 | 0.56894  | 0.04203  | 7.46813  | 0.50723  | 0.02379  | 0.16062  | -0.00515 | 0.01119  | 2083.08  | 61.80262  | 328.13  | 8.9      | 2.71     |  |  |
| 21   | 0.2086 | 2787.906 | 38.26107  | 1.36812  | 0.05342 | 8.6469   | 0.13346  | 91.64847 | 0.64896  | 2.51274  | 0.09821  | 0.01227  | 0.00529  | 233.0556 | 18.39473  | 39.82   | 3.11     | 7.81     |  |  |
| 22   | 0.212  | 161.9771 | 2.41595   | 1.09993  | 0.05453 | -0.01426 | 0.01411  | -2.65792 | 2.57439  | 2.01979  | 0.10021  | 0.00074  | 0.00388  | 166.3811 | 4.85549   | 28.52   | 0.83     | 2.91     |  |  |
| 23   | 0.2197 | 170.9929 | 2.27508   | 1.5554   | 0.03645 | 0.03943  | 0.00535  | 6.73986  | 0.91977  | 2.85709  | 0.06704  | 0.00321  | 0.00175  | 159.6159 | 2.64757   | 27.37   | 0.45     | 1.64     |  |  |
| 24   | 0.221  | 186.5396 | 6.69392   | 9.65508  | 0.39876 | 0.1509   | 0.03426  | 23.4808  | 5.36043  | 17.83737 | 0.74176  | -0.00669 | 0.00985  | 143.6958 | 11.33031  | 24.66   | 1.93     | 7.83     |  |  |
| 25   | 0.2386 | 374.1197 | 2.64585   | -0.012   | 0.00638 | 0.01701  | 0.00209  | 1.34386  | 0.16515  | -0.02201 | 0.01171  | 0.00066  | 0.00045  | 369.0596 | 2.68246   | 62.66   | 0.45     | 0.72     |  |  |
| 26   | 0.2427 | 172.7183 | 2.65262   | 0.34282  | 0.0231  | 0.10834  | 0.00694  | 18.52235 | 1.15494  | 0.62918  | 0.04241  | 0.00083  | 0.00162  | 140.7367 | 2.94812   | 24.15   | 0.5      | 2.07     |  |  |
| 27   | 0.2436 | 1414.645 | 72.27472  | -0.03684 | 0.09536 | 0.101    | 0.03325  | 2.1101   | 0.68614  | -0.06759 | 0.17497  | 0.00233  | 0.00796  | 1384.729 | 71.41038  | 224.65  | 10.89    | 4.85     |  |  |
| 28   | 0.244  | 603.5235 | 59.71328  | 6.34259  | 0.68706 | 1.17678  | 0.1551   | 57.53409 | 5.02099  | 11.69014 | 1.27202  | 0.02397  | 0.01739  | 257.4322 | 39.77754  | 43.94   | 6.71     | 15.27    |  |  |
| 29   | 0.2446 | 210.6165 | 11.75214  | 6.90802  | 0.41084 | -0.00358 | 0.04378  | -0.77628 | 6.14297  | 12.73741 | 0.76125  | 0.02537  | 0.01096  | 213.2544 | 17.66372  | 36.47   | 2.99     | 8.20     |  |  |
| 30   | 0.2709 | 198.0589 | 1.0789    | 1.00245  | 0.00872 | 0.09081  | 0.00221  | 13.50891 | 0.32185  | 1.84065  | 0.01603  | 0.0056   | 0.00026  | 171.3989 | 1.13676   | 29.37   | 0.19     | 0.65     |  |  |
| 31   | 0.2732 | 161.4305 | 5.30173   | 3.50412  | 0.14258 | 0.06595  | 0.01862  | 11.89543 | 3.3856   | 6.44553  | 0.26292  | 0.01747  | 0.00288  | 142.5544 | 7.21598   | 24.46   | 1.23     | 5.03     |  |  |
| 32   | 0.2743 | 214.6936 | 7.56735   | 5.8258   | 0.24932 | 0.12401  | 0.03516  | 16.84702 | 4.80328  | 10.73371 | 0.46125  | 0.02846  | 0.00557  | 179.237  | 12.14826  | 30.7    | 2.06     | 6.71     |  |  |
| 33   | 0.2759 | 841.1856 | 27.1073   | -0.09943 | 0.0588  | 0.14177  | 0.0285   | 4.9814   | 0.98855  | -0.18242 | 0.10788  | 0.00183  | 0.00479  | 799.1985 | 27.06926  | 133.05  | 4.34     | 3.26     |  |  |
| 34   | 0.2966 | 125.2644 | 0.91045   | 0.68999  | 0.01213 | 0.02642  | 0.0027   | 6.18831  | 0.635    | 1.26665  | 0.02227  | 0.02486  | 0.00034  | 117.5421 | 1.16876   | 20.19   | 0.2      | 0.99     |  |  |
| 35   | 0.3006 | 139.1656 | 2.42138   | 3.05165  | 0.07401 | 0.01747  | 0.01053  | 3.52901  | 2.2352   | 5.61146  | 0.13639  | 0.00259  | 0.00181  | 134.5157 | 3.90147   | 23.09   | 0.67     | 2.90     |  |  |
| 36   | 0.3018 | 170.0175 | 7.47286   | 3.12746  | 0.16317 | 0.22073  | 0.03375  | 38.21875 | 5.6217   | 5.75117  | 0.30072  | 0.01022  | 0.00364  | 105.2531 | 10.64736  | 18.09   | 1.82     | 10.06    |  |  |
| 37   | 0.3284 | 200.4948 | 1.00535   | 0.91406  | 0.01129 | 0.12883  | 0.00203  | 18.95266 | 0.28564  | 1.67826  | 0.02075  | 0.00701  | 0.00049  | 162.5766 | 1.00801   | 27.87   | 0.17     | 0.61     |  |  |
| 38   | 0.3409 | 370.6838 | 4.7499    | 0.26477  | 0.01315 | 0.051    | 0.00475  | 4.06015  | 0.37518  | 0.48591  | 0.02413  | 0.01591  | 0.00091  | 355.6715 | 4.76748   | 60.43   | 0.8      | 1.32     |  |  |
| 39   | 0.3452 | 647.0386 | 9.41745   | 0.05066  | 0.03757 | 0.19473  | 0.01038  | 8.89306  | 0.45643  | 0.09296  | 0.06894  | -0.00182 | 0.00214  | 589.4911 | 9.08042   | 99.08   | 1.48     | 1.49     |  |  |
| 40   | 0.35   | 834.6833 | 12.65033  | 0.02561  | 0.03765 | 0.1736   | 0.00997  | 6.14589  | 0.34073  | 0.047    | 0.06909  | 0.00217  | 0.00205  | 783.3709 | 12.21694  | 130.51  | 1.96     | 1.50     |  |  |
| 41   | 0.3529 | 907.0689 | 20.82598  | 0.01631  | 0.05671 | 1.05092  | 0.03155  | 34.25739 | 0.6658   | 0.09296  | 0.10406  | -0.00091 | 0.00403  | 596.4996 | 14.99226  | 100.22  | 2.45     | 2.44     |  |  |
| 42   | 0.3569 | 132.3019 | 2.30318   | 5.94652  | 0.13421 | 0.01287  | 0.01023  | 2.50309  | 2.28455  | 10.95706 | 0.24834  | 0.00053  | 0.00225  | 129.5027 | 3.78681   | 22.24   | 0.65     | 2.92     |  |  |
| 43   | 0.3646 | 140.7986 | 1.11156   | 3.06809  | 0.04112 | 0.0197   | 0.00385  | 3.95555  | 0.80683  | 5.64174  | 0.07577  | 0.00512  | 0.00095  | 135.4944 | 1.56499   | 23.26   | 0.27     | 1.16     |  |  |
| 44   | 0.3692 | 139.64   | 2.02032   | 1.20381  | 0.03869 | 0.06215  | 0.00564  | 13.08421 | 1.17919  | 2.21071  | 0.07112  | 0.01817  | 0.00185  | 121.4467 | 2.4134    | 20.86   | 0.41     | 1.97     |  |  |
| 45   | 0.372  | 319.2705 | 7.34787   | 0.98005  | 0.05981 | 0.53226  | 0.02232  | 49.24215 | 1.72879  | 1.79951  | 0.1099   | 0.0114   | 0.00297  | 162.152  | 6.67047   | 27.8    | 1.13     | 4.06     |  |  |
| 46   | 0.373  | 328.5543 | 16.17502  | 2.24486  | 0.2238  | 0.62876  | 0.04861  | 56.49899 | 3.37626  | 4.12555  | 0.41194  | 0.02742  | 0.00637  | 143.1384 | 13.17459  | 24.56   | 2.25     | 9.16     |  |  |
| 47   | 0.3787 | 684.0314 | 9.73107   | 0.05631  | 0.02818 | 0.1587   | 0.00686  | 6.85523  | 0.27993  | 0.10333  | 0.05171  | 0.00008  | 0.00119  | 637.1371 | 9.26749   | 106.85  | 1.51     | 1.41     |  |  |
| 48   | 0.3909 | 792.0516 | 6.42875   | 0.91556  | 0.01878 | 0.25533  | 0.00411  | 9.51661  | 0.13267  | 1.68102  | 0.03451  | 0.00304  | 0.00081  | 717.1119 | 5.91979   | 119.83  | 0.96     | 0.80     |  |  |
| 49   | 0.3953 | 260.8876 | 3.34377   | 5.56597  | 0.10543 | 0.33217  | 0.01717  | 37.45287 | 1.88691  | 10.25309 | 0.19498  | 0.00166  | 0.00202  | 163.803  | 5.38322   | 28.08   | 0.92     | 3.28     |  |  |
| 50   | 0.397  | 213.3152 | 6.21492   | 2.01067  | 0.09655 | 0.24331  | 0.02719  | 33.6322  | 3.63865  | 3.69454  | 0.17766  | 0.08538  | 0.00651  | 141.7542 | 8.81218   | 24.33   | 1.5      | 6.17     |  |  |
| 51   | 0.4113 | 883.0353 | 4.40516   | 0.04875  | 0.01248 | 0.13032  | 0.00399  | 4.3609   | 0.13192  | 0.08945  | 0.0229   | 0.00136  | 0.00068  | 844.5277 | 4.37237   | 140.31  | 0.7      | 0.50     |  |  |
| 52   | 0.4137 | 354.5152 | 5.79496   | 1.79087  | 0.06047 | 0.63459  | 0.0276   | 52.85818 | 2.13452  | 3.29016  | 0.11124  | 0.09678  | 0.00545  | 167.3226 | 8.06462   | 28.68   | 1.37     | 4.78     |  |  |
| 53   | 0.4144 | 57368.98 | 7174.9106 | 0.24945  | 0.24596 | 11.67528 | 14.74435 | 60.60138 | 0.48505  | 0.45779  | 0.45146  | 0.19213  | 0.05317  | 22606.55 | 2841.5134 | 2077.64 | 155      | 7.46     |  |  |
| 54   | 0.4236 | 1085.259 | 12.3415   | 0.15846  | 0.01856 | 0.18895  |          |          |          |          |          |          |          |          |           |         |          |          |  |  |

|     |        |          |           |          |         |          |         |          |          |          |          |          |         |          |           |        |        |        |
|-----|--------|----------|-----------|----------|---------|----------|---------|----------|----------|----------|----------|----------|---------|----------|-----------|--------|--------|--------|
| 91  | 0.6386 | 536.2181 | 7.34392   | 0.21019  | 0.02164 | 0.03584  | 0.00619 | 1.97193  | 0.34029  | 0.38573  | 0.03971  | 0.00555  | 0.00117 | 525.6932 | 7.42982   | 88.61  | 1.22   | 1.38   |
| 92  | 0.641  | 186.4141 | 5.14411   | 2.34202  | 0.09964 | 0.0414   | 0.0115  | 6.45987  | 1.81412  | 4.3044   | 0.18344  | 0.00848  | 0.00413 | 174.6331 | 5.89851   | 29.92  | 1      | 3.34   |
| 93  | 0.6415 | 471.5474 | 35.38714  | 8.48995  | 0.68486 | 0.51504  | 0.08887 | 32.1291  | 5.01712  | 15.67185 | 1.27184  | 0.06258  | 0.01475 | 321.9538 | 34.0313   | 54.78  | 5.7    | 10.41  |
| 94  | 0.6495 | 364.3814 | 2.29657   | 0.24286  | 0.01569 | 0.08627  | 0.00684 | 6.9911   | 0.55329  | 0.44569  | 0.02881  | 0.00644  | 0.00102 | 338.9376 | 2.9417    | 57.63  | 0.49   | 0.85   |
| 95  | 0.6499 | 142.005  | 11.28219  | 11.62741 | 0.98013 | -0.03512 | 0.08392 | -7.98427 | 17.45793 | 21.51134 | 1.82831  | 0.03342  | 0.02023 | 154.5805 | 27.88193  | 26.51  | 4.75   | 17.92  |
| 96  | 0.6577 | 175.8659 | 2.05029   | 1.48128  | 0.03045 | 0.06863  | 0.00439 | 11.46447 | 0.72625  | 2.72079  | 0.05599  | 0.00764  | 0.00093 | 155.8406 | 2.22864   | 26.73  | 0.38   | 1.42   |
| 97  | 0.6601 | 164.9976 | 3.49271   | 1.58632  | 0.05224 | 0.06719  | 0.01614 | 11.95627 | 2.88047  | 2.91395  | 0.09606  | 0.00233  | 0.00229 | 145.4068 | 5.67143   | 24.95  | 0.97   | 3.89   |
| 98  | 0.6621 | 155.9991 | 4.0127    | 0.29179  | 0.05856 | 0.1001   | 0.01365 | 18.95049 | 2.54171  | 0.5355   | 0.10749  | 0.00396  | 0.00331 | 126.4385 | 5.1348    | 21.71  | 0.88   | 4.05   |
| 99  | 0.663  | 140.4053 | 7.05033   | 4.19955  | 0.29643 | 0.10335  | 0.02824 | 21.50947 | 5.84416  | 7.72852  | 0.54716  | 0.01425  | 0.00806 | 110.5094 | 9.94196   | 18.99  | 1.7    | 8.95   |
| 100 | 0.6637 | 198.844  | 8.84074   | 5.78398  | 0.32921 | 0.15987  | 0.05671 | 23.52237 | 8.36346  | 10.65634 | 0.60901  | 0.03003  | 0.01149 | 152.6721 | 18.04051  | 26.19  | 3.07   | 11.72  |
| 101 | 0.6653 | 452.0906 | 19.41929  | 4.90725  | 0.23532 | 0.92664  | 0.04733 | 60.48219 | 1.68443  | 9.03543  | 0.43479  | 0.02157  | 0.00565 | 179.2659 | 10.88982  | 30.71  | 1.85   | 6.02   |
| 102 | 0.668  | 216.1083 | 6.58674   | 1.40715  | 0.0671  | 0.25551  | 0.0171  | 34.88847 | 2.08421  | 2.58449  | 0.12337  | 0.00262  | 0.00226 | 140.832  | 6.23542   | 24.17  | 1.06   | 4.39   |
| 103 | 0.6989 | 614.2294 | 3.29284   | 0.4494   | 0.00731 | 1.72165  | 0.01496 | 82.82517 | 0.56818  | 0.82485  | 0.01343  | 0.01142  | 0.00077 | 105.5213 | 3.53838   | 18.14  | 0.61   | 3.36   |
| 104 | 0.7375 | 345.8652 | 1.04294   | 0.45062  | 0.00608 | 0.00717  | 0.00129 | 0.60228  | 0.11006  | 0.82709  | 0.01117  | 0.00926  | 0.00034 | 343.862  | 1.10507   | 58.45  | 0.18   | 0.31   |
| 105 | 0.7394 | 255.8793 | 9.16492   | 1.55403  | 0.09633 | 0.32848  | 0.03562 | 37.88808 | 3.88485  | 2.85457  | 0.17715  | 0.00499  | 0.00392 | 159.0877 | 11.47645  | 27.28  | 1.95   | 7.15   |
| 106 | 0.7397 | 5218.063 | 581.28718 | 19.76856 | 2.24441 | 16.31807 | 1.82843 | 92.37887 | 1.13161  | 36.78616 | 4.23562  | 0.24556  | 0.03855 | 403.3038 | 75.31026  | 68.37  | 12.53  | 18.33  |
| 107 | 0.7871 | 392.0853 | 1.72452   | 0.12181  | 0.00429 | 0.0695   | 0.00101 | 5.23574  | 0.07273  | 0.22351  | 0.00788  | 0.00236  | 0.00022 | 371.5605 | 1.65978   | 63.08  | 0.28   | 0.44   |
| 108 | 0.7902 | 156.4015 | 2.43399   | 2.7239   | 0.06969 | 0.03393  | 0.01488 | 6.2681   | 2.81054  | 5.00762  | 0.12836  | 0.00107  | 0.00257 | 146.8528 | 4.96428   | 25.2   | 0.85   | 3.37   |
| 109 | 0.8446 | 152.2583 | 1.8866    | 0.03028  | 0.00201 | 0.05802  | 0.00135 | 11.26077 | 0.22274  | 0.05556  | 0.00369  | 0.00031  | 0.00014 | 135.0893 | 1.70844   | 23.19  | 0.29   | 1.25   |
| 110 | 0.8561 | 163.3699 | 1.41488   | 1.19822  | 0.02147 | 0.02161  | 0.00368 | 3.84978  | 0.66428  | 2.20044  | 0.03945  | 0.00032  | 0.00051 | 157.185  | 1.74372   | 26.96  | 0.3    | 1.11   |
| 111 | 0.8594 | 477.5519 | 6.2266    | 0.5642   | 0.03596 | 0.30421  | 0.017   | 18.81543 | 1.02409  | 1.03565  | 0.06603  | -0.00024 | 0.00179 | 387.8288 | 7.05554   | 65.79  | 1.18   | 1.79   |
| 112 | 0.8635 | 200.5381 | 2.30048   | 0.39767  | 0.03108 | 0.1858   | 0.01434 | 27.36546 | 2.09047  | 0.72987  | 0.05706  | 0.00221  | 0.00181 | 145.6793 | 4.51847   | 25     | 0.77   | 3.08   |
| 113 | 0.8636 | 4052.418 | 4251.7585 | 6.65     | 7.87309 | 7.68148  | 8.19645 | 55.99977 | 10.89839 | 12.25942 | 14.58268 | 1.25053  | 1.33113 | 1791.474 | 1940.0193 | 285.64 | 286.06 | 100.15 |
| 114 | 0.8642 | 229.5777 | 19.38802  | 5.76062  | 0.5308  | 0.26075  | 0.09346 | 33.35943 | 11.69554 | 10.61312 | 0.98192  | 0.06307  | 0.01595 | 153.597  | 29.95006  | 26.34  | 5.1    | 19.36  |
| 115 | 0.8869 | 239.9594 | 1.80985   | 0.04267  | 0.00571 | 0.06081  | 0.002   | 7.48819  | 0.23945  | 0.0783   | 0.01048  | 0.00088  | 0.00036 | 221.97   | 1.77257   | 37.95  | 0.3    | 0.79   |
| 116 | 0.9222 | 165.958  | 1.19141   | 0.17073  | 0.00603 | 0.15344  | 0.00298 | 27.31808 | 0.49381  | 0.31331  | 0.01106  | 0.01328  | 0.0005  | 120.6144 | 1.19301   | 20.72  | 0.2    | 0.97   |
| 117 | 0.9284 | 163.6299 | 3.13873   | 1.36625  | 0.03936 | 0.02655  | 0.00491 | 4.72745  | 0.88231  | 2.50931  | 0.07235  | 0.00327  | 0.00087 | 156.0167 | 3.32713   | 26.76  | 0.57   | 2.13   |
| 118 | 0.943  | 161.9873 | 1.57325   | 0.89162  | 0.01984 | 0.01041  | 0.00286 | 1.85435  | 0.5209   | 1.63703  | 0.03645  | 0.00432  | 0.00039 | 159.0545 | 1.76199   | 27.27  | 0.3    | 1.10   |
| 119 | 0.9542 | 158.2385 | 1.48548   | 1.88436  | 0.03205 | 0.08746  | 0.00485 | 16.23808 | 0.89333  | 3.46215  | 0.05896  | -0.00014 | 0.00072 | 132.6954 | 1.89201   | 22.78  | 0.32   | 1.40   |
| 120 | 0.9738 | 166.607  | 0.93065   | 1.50193  | 0.02338 | 0.04896  | 0.00207 | 8.61141  | 0.36396  | 2.75877  | 0.04299  | 0.00645  | 0.00051 | 152.3943 | 1.0496    | 26.14  | 0.18   | 0.69   |
| 121 | 1      | 152.1581 | 1.03343   | 0.05683  | 0.00626 | 0.01822  | 0.0021  | 3.53547  | 0.40722  | 0.10428  | 0.01148  | 0.00082  | 0.00026 | 146.7558 | 1.17448   | 25.18  | 0.2    | 0.79   |

|            |          |         |         |         |         |         |          |         |         |         |        |         |          |         |       |      |      |
|------------|----------|---------|---------|---------|---------|---------|----------|---------|---------|---------|--------|---------|----------|---------|-------|------|------|
| Integrated | 378.1977 | 0.44784 | 0.90396 | 0.00242 | 0.31927 | 0.00104 | 24.92768 | 0.07616 | 1.65971 | 0.00445 | 0.0075 | 0.00011 | 284.0809 | 0.44379 | 48.43 | 0.25 | 0.52 |
|------------|----------|---------|---------|---------|---------|---------|----------|---------|---------|---------|--------|---------|----------|---------|-------|------|------|

Notes:

Parsed grains less than -2 Ma

Parsed grains between -2 Ma and zero not within one sigma of zero

Parsed grains that did not pass 50% error filter applied to ages between 2 Ma and 5 Ma

Parsed grains that did not pass 20% error filter applied to >5 Ma ages

Did not parse grains 2 Ma to zero
