# Supplementary material
Source: publisher figshare collection journal article supplement (https://gsapubs.figshare.com/articles/dataset/_/15167367)
Supplement: Supplementary file 3 [file 1]

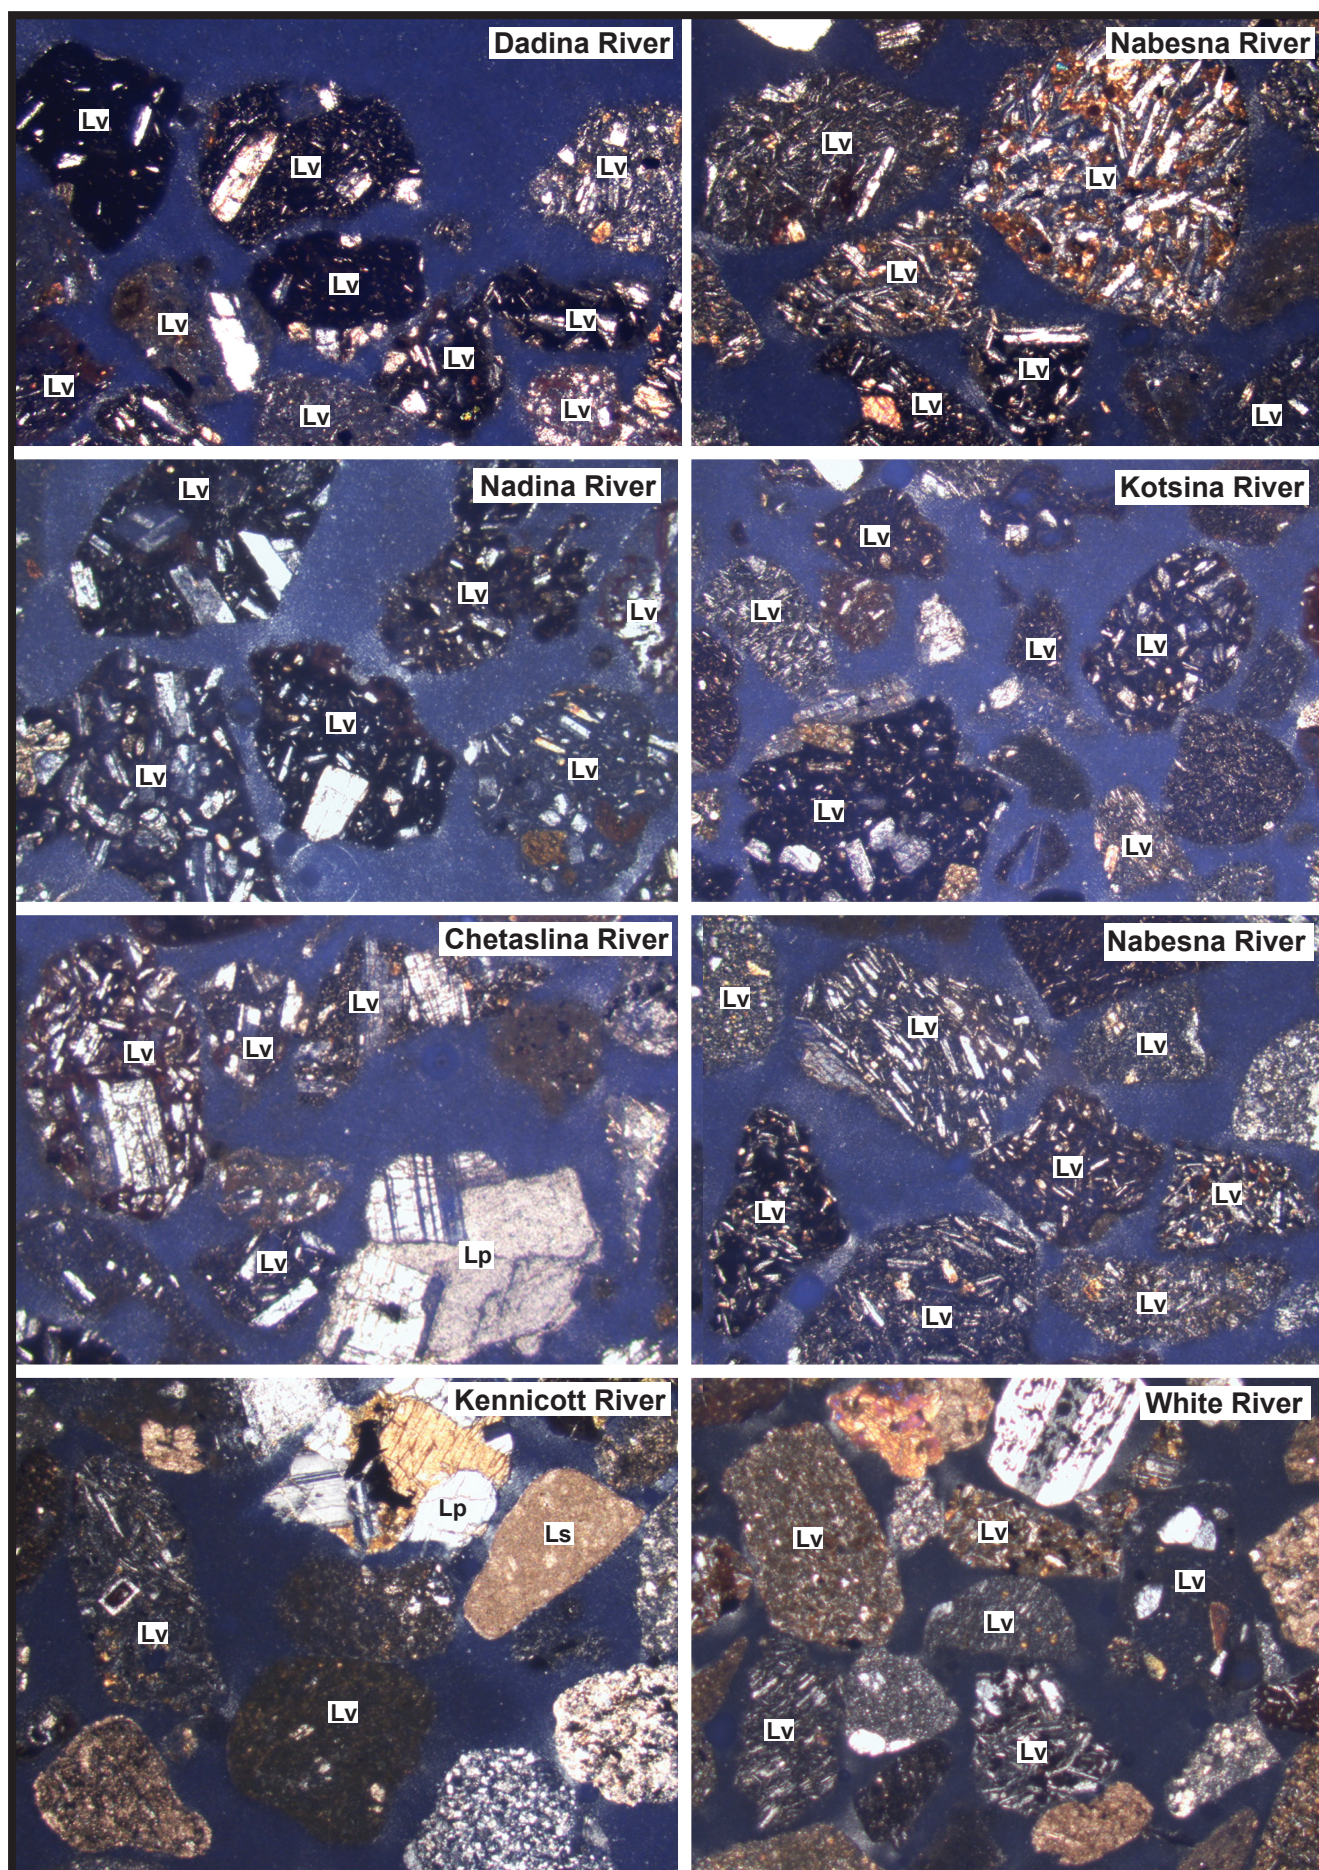

**Supplemental Item S2** - Photomicrographs of representative modern river sand samples showing abundant volcanic lithic grains (Lv), especially lathwork varieties, and subordinate plutonic (Lp) and sedimentary (Ls) lithic grains. All images in cross-polarized light. Refer to Table 1 and Figure 3 for sample locations.
