# Supplementary material
Source: publisher figshare collection journal article supplement (https://gsapubs.figshare.com/articles/dataset/_/15167367)
Supplement: Supplementary file 4 [file 1]

**Supplemental Item S7 - New igneous bedrock <sup>40</sup>Ar/<sup>39</sup>Ar fusion ages from the Wrangell Arc, Wrangell-St. Elias Mountains, Alaska**

Weighted average of J from standards = 1.185e-04 +/- 5.157e-07

| Sample  | Phase dated | UTM Easting or Latitude N (deg) | UTM Northing or Longitude W (deg) | Location         | Rock type            | 40Ar/39Ar meas. | +/-     | 37Ar/39Ar meas. | +/-     | 36Ar/39Ar meas. | +/-     | % Atm. 40Ar | +/-     | Ca/K    | +/-     | Cl/K    | +/-     | 40*/39K  | +/-     | Age (Ma) | +/- (Ma) | Volts   | # Grains |
|---------|-------------|---------------------------------|-----------------------------------|------------------|----------------------|-----------------|---------|-----------------|---------|-----------------|---------|-------------|---------|---------|---------|---------|---------|----------|---------|----------|----------|---------|----------|
| SB-01   | WR          | 07 v 0400535                    | 6875995                           | Green Hills area | Porphyritic lava     | 124.77333       | 1.13648 | 1.77431         | 0.02085 | 0.33306         | 0.00408 | 78.77962    | 0.74646 | 3.25971 | 0.03835 | 0.00293 | 0.0005  | 26.50429 | 0.9931  | 5.65     | 0.21     | 1.22019 | 2        |
| SB-02   | WR          | 07 v 0400507                    | 6875885                           | Green Hills area | Porphyritic lava     | 141.16226       | 0.89336 | 1.24033         | 0.01451 | 0.38696         | 0.00915 | 80.94878    | 1.85739 | 2.27783 | 0.02668 | 0.00198 | 0.00069 | 26.91106 | 2.63272 | 5.74     | 0.56     | 0.69077 | 2        |
| SB15-03 | WR          | 07 v 0399991                    | 6875469                           | Green Hills area | Lava                 | 183.66915       | 1.41128 | 5.4602          | 0.0504  | 0.5097          | 0.01296 | 81.77166    | 2.00547 | 10.0575 | 0.0932  | 0.00448 | 0.00123 | 33.60402 | 3.7136  | 7.16     | 0.79     | 0.48904 | 2        |
| SB15-04 | WR          | 07 v 0400225                    | 6873390                           | Green Hills area | Andesite lava        | 46.43677        | 0.35172 | 1.5596          | 0.01414 | 0.06839         | 0.00173 | 43.27211    | 1.0562  | 2.86481 | 0.026   | 0.00257 | 0.00026 | 26.3548  | 0.5334  | 5.62     | 0.11     | 0.55526 | 2        |
| SB15-05 | WR          | 07 v 0400234                    | 6873378                           | Green Hills area | Basalt/andesite lava | 68.35331        | 0.7198  | 2.16305         | 0.03177 | 0.14488         | 0.00434 | 62.39959    | 1.7739  | 3.97497 | 0.05848 | 0.00244 | 0.00054 | 25.72928 | 1.25043 | 5.49     | 0.27     | 0.38123 | 2        |
| SB15-06 | WR          | 07 v 0400068                    | 6872705                           | Green Hills area | Felsic lava          | 33.05152        | 0.18782 | 0.61171         | 0.00648 | 0.0299          | 0.00131 | 26.60016    | 1.16877 | 1.12289 | 0.01189 | 0.00227 | 0.00024 | 24.24845 | 0.41391 | 5.17     | 0.09     | 0.61921 | 2        |
| SB15-07 | WR          | 07 v 0399943                    | 6872537                           | Green Hills area | Basalt/andesite lava | 563.33889       | 3.61124 | 1.59257         | 0.01325 | 1.78704         | 0.02175 | 93.72117    | 0.97357 | 9.25243 | 0.02436 | 0.01189 | 0.00095 | 35.40906 | 5.49647 | 7.55     | 1.17     | 6.39181 | 2        |
| SB15-08 | WR          | 07 v 0400010                    | 6872294                           | Green Hills area | Felsic pryclastic    | 50.0922         | 0.48808 | 4.36152         | 0.05318 | 0.0993          | 0.00493 | 57.89471    | 2.86341 | 8.02751 | 0.09818 | 0.00094 | 0.00059 | 21.14412 | 1.45577 | 4.51     | 0.31     | 0.23075 | 4        |
| SB15-09 | WR          | 07 v 0400146                    | 6872026                           | Green Hills area | Basalt/andesite lava | 26.97636        | 0.21154 | 0.53544         | 0.00748 | 0.0186          | 0.00201 | 20.23135    | 2.19471 | 0.98282 | 0.01373 | 0.00198 | 0.00017 | 21.50313 | 0.61568 | 4.59     | 0.13     | 0.22447 | 2        |
| SB15-10 | WR          | 07 v 0400263                    | 6871822                           | Green Hills area | Basalt/andesite lava | 62.13946        | 0.48693 | 1.52232         | 0.0173  | 0.13581         | 0.00368 | 64.4101     | 1.68576 | 2.79625 | 0.03182 | 0.00761 | 0.00038 | 22.1286  | 1.06613 | 4.72     | 0.23     | 0.46776 | 1        |
| SB15-11 | WR          | 07 v 0400315                    | 6871765                           | Green Hills area | Basalt/andesite lava | 94.85685        | 0.64362 | 4.3451          | 0.04078 | 0.24513         | 0.0051  | 76.00798    | 1.51015 | 7.99721 | 0.07528 | 0.00509 | 0.00039 | 22.821   | 1.447   | 4.87     | 0.31     | 0.76361 | 2        |
| SB15-12 | WR          | 07 v 0400356                    | 6871732                           | Green Hills area | Andesite/dacite lava | 89.20962        | 0.47418 | 1.67031         | 0.01745 | 0.22389         | 0.00508 | 74.03317    | 1.64662 | 3.06841 | 0.03209 | 0.00592 | 0.00046 | 23.18456 | 1.47811 | 4.94     | 0.31     | 0.72563 | 2        |
| SB15-14 | WR          | 07 v 0400396                    | 6876250                           | Green Hills area | Andesite lava        | 33.68459        | 0.25784 | 0.82222         | 0.00907 | 0.03246         | 0.00125 | 28.2959     | 1.08023 | 1.50953 | 0.01666 | 0.00316 | 0.00024 | 24.14597 | 0.41094 | 5.15     | 0.09     | 0.35907 | 2        |

Weighted average of J from standards = 1.097e-04 +/- 4.804e-07

| Sample name |    | UTM Easting or Latitude N (deg) | UTM Northing or Longitude W (deg) |                  |                      | 40Ar/39Ar meas. | +/-     | 37Ar/39Ar meas. | +/-     | 36Ar/39Ar meas. | +/-     | % Atm. 40Ar | +/-     | Ca/K    | +/-     | Cl/K    | +/-     | 40*/39K   | +/-     | Age (Ma) | +/- (Ma) | Volts   | # Grains |
|-------------|----|---------------------------------|-----------------------------------|------------------|----------------------|-----------------|---------|-----------------|---------|-----------------|---------|-------------|---------|---------|---------|---------|---------|-----------|---------|----------|----------|---------|----------|
| SB-45       | WR | 07 v 0492754                    | 6858664                           | Cabin Creek area | Rhyolite plug        | 105.08924       | 0.47711 | 0.29121         | 0.00447 | 0.00539         | 0.00119 | 1.49384     | 0.33589 | 0.53444 | 0.0082  | 0.00654 | 0.0002  | 103.51141 | 0.58885 | 20.34    | 0.12     | 1.79464 | 1        |
| SB-57       | WR | 07 v 0403822                    | 6876252                           | Euchre Mountain  | Basalt/andesite lava | 37.38511        | 0.30713 | 1.49321         | 0.0186  | 0.10241         | 0.0035  | 80.67976    | 2.70686 | 2.74272 | 0.0342  | 0.01344 | 0.00068 | 7.22478   | 1.01559 | 1.43     | 0.2      | 0.22764 | 2        |
| SB-58       | WR | 07 v 0437780                    | 6880770                           | Euchre Mountain  | Basalt/andesite lava | 10.75998        | 0.09356 | 1.72545         | 0.02515 | 0.0057          | 0.00278 | 14.36995    | 7.66163 | 3.16982 | 0.04627 | 0.01608 | 0.00068 | 9.19959   | 0.82757 | 1.82     | 0.16     | 0.04352 | 2        |
| SB-59       | WR | 07 v 0437716                    | 6880729                           | Euchre Mountain  | Dacite lava          | 14.45586        | 0.07451 | 1.61088         | 0.01464 | 0.01491         | 0.00149 | 29.61598    | 3.04673 | 2.95912 | 0.02691 | 0.00511 | 0.00033 | 10.1653   | 0.44378 | 2.01     | 0.09     | 0.16205 | 2        |
| SB-60       | WR | 07 v 0437711                    | 6990630                           | Euchre Mountain  | Basalt/andesite lava | 74.16088        | 0.37732 | 1.99416         | 0.0189  | 0.21844         | 0.00351 | 86.85098    | 1.34516 | 3.66417 | 0.03477 | 0.02518 | 0.00055 | 9.76128   | 1.00176 | 1.93     | 0.2      | 0.81188 | 2        |
| SB-61       | WR | 07 v 0437705                    | 6880606                           | Euchre Mountain  | Dacite lava          | 28.11437        | 0.14811 | 2.43937         | 0.01703 | 0.06328         | 0.00166 | 65.86469    | 1.73202 | 4.48364 | 0.03135 | 0.02005 | 0.00054 | 9.60335   | 0.49215 | 1.9      | 0.1      | 0.27584 | 2        |
| SB-62       | WR | 07 v 0437761                    | 6880563                           | Euchre Mountain  | Dacite lava          | 22.80175        | 0.1843  | 3.17736         | 0.04982 | 0.05035         | 0.0034  | 64.18637    | 4.39908 | 5.84313 | 0.09182 | 0.00818 | 0.00092 | 8.17386   | 1.00789 | 1.61     | 0.2      | 0.10366 | 2        |
| SB-63       | WR | 07 v 0437682                    | 6880522                           | Euchre Mountain  | Andesite lava        | 75.52482        | 0.54494 | 4.78952         | 0.04363 | 0.22868         | 0.00979 | 88.98703    | 3.77844 | 8.81794 | 0.0806  | 0.02594 | 0.00104 | 8.34248   | 2.86317 | 1.65     | 0.57     | 0.29426 | 2        |
| SB-64       | WR | 07 v 0437463                    | 6880468                           | Euchre Mountain  | Andesite lava        | 119.18283       | 1.63214 | 4.28113         | 0.07406 | 0.37905         | 0.01224 | 93.70753    | 2.76165 | 7.87911 | 0.13671 | 0.01787 | 0.00101 | 7.52042   | 3.30328 | 1.49     | 0.65     | 0.31275 | 2        |

Weighted average of J from standards = 1.121e-04 +/- 6.859e-07

| Sample |    | UTM Easting or Latitude N (deg) | UTM Northing or Longitude W (deg) |                 |               | 40Ar/39Ar meas. | +/-     | 37Ar/39Ar meas. | +/-     | 36Ar/39Ar meas. | +/-     | % Atm. 40Ar | +/-     | Ca/K     | +/-     | Cl/K    | +/-     | 40*/39K  | +/-     | Age (Ma) | +/- (Ma) | Volts   | # Grains |
|--------|----|---------------------------------|-----------------------------------|-----------------|---------------|-----------------|---------|-----------------|---------|-----------------|---------|-------------|---------|----------|---------|---------|---------|----------|---------|----------|----------|---------|----------|
| SB-65  | WR | 07 v 0436908                    | 6880054                           | Euchre Mountain | Andesite lava | 55.22326        | 0.89913 | 5.66397         | 0.10914 | 0.15518         | 0.00734 | 82.23546    | 3.70665 | 10.43434 | 0.20188 | 0.01281 | 0.00107 | 9.84428  | 2.06222 | 1.99     | 0.42     | 0.15352 | 1        |
| SB-66  | WR | 07 v 0382099                    | 6910524                           | Pass Creek      | Basalt lava   | 123.43972       | 1.02918 | 2.88864         | 0.03391 | 0.36057         | 0.00918 | 86.14397    | 2.08949 | 5.31109  | 0.06248 | 0.00673 | 0.00063 | 17.13469 | 2.59043 | 3.46     | 0.52     | 0.537   | 1        |

Weighted average of J from standards = 1.028e-04 +/- 5.880e-07

| Sample name |    | UTM Easting or Latitude N (deg) | UTM Northing or Longitude W (deg) |                    |                      | 40Ar/39Ar meas. | +/-      | 37Ar/39Ar meas. | +/-     | 36Ar/39Ar meas. | +/-     | % Atm. 40Ar | +/-     | Ca/K     | +/-     | Cl/K     | +/-     | 40*/39K   | +/-     | Age (Ma) | +/- (Ma) | Volts    | # Grains |
|-------------|----|---------------------------------|-----------------------------------|--------------------|----------------------|-----------------|----------|-----------------|---------|-----------------|---------|-------------|---------|----------|---------|----------|---------|-----------|---------|----------|----------|----------|----------|
| 15JB011A    | WR | 62.01565                        | 142.892                           | Green Hills area   | Basalt/andesite dike | 113.46105       | 0.81008  | 2.29184         | 0.04026 | 0.2805          | 0.0086  | 72.90646    | 2.18348 | 4.21203  | 0.0741  | 0.00227  | 0.00073 | 30.78241  | 2.49285 | 5.7      | 0.46     | 0.50061  | 1        |
| 15JB021A    | WR | 62.01565                        | 142.892                           | Green Hills area   | Hypabyssal intrusion | 117.35532       | 1.1765   | 0.42096         | 0.01607 | 0.29499         | 0.00858 | 74.26733    | 0.29369 | 0.77264  | 0.02951 | 0.00421  | 0.00138 | 30.2      | 2.41772 | 5.59     | 0.45     | 0.44559  | 1        |
| 15JB051A    | WR | 62.23203                        | 142.974                           | Monte Cristo Creek | Hypabyssal intrusion | 183.87788       | 1.35266  | 6.56171         | 0.06961 | 0.27798         | 0.01015 | 44.38623    | 1.60246 | 12.09589 | 0.12893 | 0.00678  | 0.00127 | 102.72099 | 3.06437 | 18.94    | 0.56     | 0.62484  | 1        |
| 15JB091A    | WR | 62.11008                        | 142.4666                          | Cross Creek area   | Hypabyssal intrusion | 166.77422       | 0.88561  | 0.80448         | 0.00728 | 0.14907         | 0.00198 | 26.37784    | 0.32478 | 1.47696  | 0.01338 | 0.001494 | 0.00043 | 122.83072 | 0.85768 | 22.62    | 0.16     | 2.45314  | 1        |
| 15JB121A    | WR | 62.48293                        | 143.098798                        | Nabesna area       | Basalt/andesite lava | 612.24815       | 6.09144  | 3.80331         | 0.06198 | 1.94204         | 0.0361  | 93.68527    | 1.48321 | 6.99735  | 0.11433 | 0.00619  | 0.00329 | 38.76406  | 9.11783 | 7.17     | 1.68     | 0.9661   | 1        |
| 15JB251A    | WR | 61.87848                        | 141.0013                          | Rocker Creek area  | Basalt/andesite lava | 1776.79713      | 21.46266 | 6.271           | 0.08629 | 4.85416         | 0.06563 | 80.7021     | 0.49299 | 11.55762 | 0.15975 | 0.02986  | 0.00231 | 344.40402 | 9.75002 | 62.72    | 1.75     | 10.92289 | 1        |
| 15JB281A    | WR | 61.87213                        | 141.0259                          | Rocker Creek area  | Basalt/andesite lava | 148.60255       | 0.94232  | 0.22925         | 0.00545 | 0.07694         | 0.00203 | 15.28969    | 0.39226 | 4.4207   | 0.01001 | 0.00447  | 0.00042 | 125.8769  | 0.99239 | 23.18    | 0.18     | 1.90485  | 1        |
| 15JB341A    | WR | 61.88716                        | 141.022                           | Rocker Creek area  | Rhyolite dome        | 272.15837       | 2.53092  | 1.02355         | 0.01409 | 0.43251         | 0.00868 | 46.93436    | 0.83907 | 1.87943  | 0.02589 | 0.00279  | 0.0012  | 144.51128 | 2.66314 | 26.58    | 0.49     | 2.00045  | 1        |
| 15JB381A    | WR | 61.8816                         | 140.9876                          | Rocker Creek area  | Rhyolite lava        | 128.55037       | 0.43864  | 0.06109         | 0.00183 | 0.00741         | 0.0005  | 1.70062     | 0.11474 | 0.11209  | 0.00336 | 0.00038  | 0.00016 | 126.34048 | 4.55886 | 23.26    | 0.08     | 4.78694  | 1        |
| 15JB391A    | WR | 61.87183                        | 141.0331                          | Rocker Creek area  | Basalt/andesite lava | 153.14689       | 0.88566  | 0.926           | 0.01074 | 0.09293         | 0.00258 | 17.8855     | 0.4885  | 1.7002   | 0.01973 | 0.00112  | 0.00058 | 125.81372 | 1.04831 | 23.17    | 0.19     | 1.41786  | 1        |

Weighted average of J from standards = 1.0173e-04 +/- 5.880e-07

| Sample name       |    | UTM Easting or<br>Latitude N (deg) | UTM Northing or<br>Longitude W (deg) |                   |                      | 40Ar/39Ar<br>meas. | +/-      | 37Ar/39Ar<br>meas. | +/-     | 36Ar/39Ar<br>meas. | +/-     | % Atm.<br>40Ar | +/-     | Ca/K     | +/-     | Cl/K    | +/-     | 40*/39K   | +/-     | Age<br>(Ma) | +/-<br>(Ma) | Volts   | # Grains |
|-------------------|----|------------------------------------|--------------------------------------|-------------------|----------------------|--------------------|----------|--------------------|---------|--------------------|---------|----------------|---------|----------|---------|---------|---------|-----------|---------|-------------|-------------|---------|----------|
| 15JB441A          | WR | 61.88728                           | 141.0333                             | Rocker Creek area | Rhyolite lava        | 706.68555          | 18.72061 | 9.89719            | 0.2807  | 0.17689            | 0.01674 | 7.28137        | 0.6724  | 18.28781 | 0.52232 | 0.069   | 0.00381 | 65.81361  | 18.2471 | 117.07      | 3.13        | 0.31225 | 1        |
| 15JB501A          | WR | 62.04721                           | 142.2343                             | Euchre Mountain   | Basalt/andesite lava | 102.70033          | 1.03333  | 7.12821            | 0.10196 | 0.3014             | 0.01    | 86.17329       | 2.75332 | 13.14547 | 0.18898 | 0.00254 | 0.00217 | 14.26781  | 2.8465  | 2.61        | 0.52        | 0.0367  | 1        |
| 15JB511A-RHYOLITE | WR | 62.04752                           | 142.2366                             | Euchre Mountain   | Rhyolite lava        | 12.61568           | 0.09355  | 0.97598            | 0.01403 | 0.00438            | 0.00275 | 9.64109        | 6.44624 | 1.79202  | 0.02578 | 0.00335 | 0.00088 | 11.38042  | 0.81642 | 2.09        | 0.15        | 0.15878 | 1        |
| 15JB521A          | WR | 62.04952                           | 142.2421                             | Euchre Mountain   | Rhyolite lava        | 13.36749           | 0.09187  | 1.1819             | 0.01168 | 0.00578            | 0.00244 | 12.08486       | 5.39434 | 2.17044  | 0.02146 | 0.00326 | 0.00027 | 11.73575  | 0.7247  | 2.15        | 0.13        | 1.08642 | 1        |
| 15JB551A          | HO | 62.00842                           | 142.3194                             | Euchre Mountain   | Hypabyssal intrusion | 234.55041          | 6.87045  | 12.42681           | 0.38044 | 0.25806            | 0.02709 | 32.07968       | 3.27935 | 23.00336 | 0.71047 | 0.2693  | 0.01081 | 160.69767 | 9.10404 | 29.22       | 1.64        | 0.38786 | 3        |
| Short             | HO | 07 v 0401138                       | 6905326                              | Bond Creek area   | Hypabyssal intrusion | 266.88243          | 4.67346  | 17.33722           | 0.31806 | 0.54878            | 0.02067 | 60.23401       | 2.02912 | 32.20573 | 0.59815 | 0.15752 | 0.00389 | 107.43215 | 5.80766 | 19.59       | 1.05        | 0.60527 | 3        |
| Bond Fine         | HO | N62°16'26.1"                       | W142°51'21.3"                        | Bond Creek area   | Hypabyssal intrusion | 174.7878           | 2.0338   | 12.1433            | 0.16773 | 0.28512            | 0.01111 | 47.63816       | 1.29065 | 22.47402 | 0.31311 | 0.21034 | 0.00343 | 92.92823  | 3.57512 | 16.84       | 0.61        | 0.24382 | 4        |

| Sample name  |    | UTM Easting or<br>Latitude N (deg) | UTM Northing or<br>Longitude W (deg) |                   |                      | 40Ar/39Ar<br>meas. | +/-     | 37Ar/39Ar<br>meas. | +/-     | 36Ar/39Ar<br>meas. | +/-     | % Atm.<br>40Ar | +/-     | Ca/K     | +/-     | Cl/K    | +/-     | 40*/39K<br>+/- | Age<br>(Ma) | +/-<br>(Ma) | Volts | # Grains |   |
|--------------|----|------------------------------------|--------------------------------------|-------------------|----------------------|--------------------|---------|--------------------|---------|--------------------|---------|----------------|---------|----------|---------|---------|---------|----------------|-------------|-------------|-------|----------|---|
| 15JB20LATUFF | BI | 61.90856                           | 141.0505                             | Rocker Creek area | Rhyolite tuff        | 158.38014          | 0.40074 | -0.00322           | 0.00245 | 0.01197            | 0.00086 | 2.23436        | 0.16115 | -0.00591 | 0.0045  | 0.00569 | 0.0002  | 154.81196      | 0.46779     | 27.86       | 0.08  | 4.98111  | 1 |
| 15JB09LA     | HO | 62.11008                           | 142.4666                             | Cross Creek area  | Hypabyssal intrusion | 214.88561          | 2.78416 | 14.21231           | 0.20004 | 0.26937            | 0.00852 | 36.50186       | 1.07305 | 26.34202 | 0.37453 | 0.22271 | 0.00401 | 137.8129       | 2.95933     | 24.82       | 0.53  | 0.62825  | 1 |

Weighted average of J from standards = 1.347e-04 +/- 2.749e-06

| Sample name |    | UTM Easting or<br>Latitude N (deg) | UTM Northing or<br>Longitude W (deg) |                      |      | 40Ar/39Ar<br>meas. | +/-     | 37Ar/39Ar<br>meas. | +/-     | 36Ar/39Ar<br>meas. | +/-     | % Atm.<br>40Ar | +/-     | Ca/K    | +/-     | Cl/K    | +/-     | 40*/39K<br>+/- | Age<br>(Ma) | +/-<br>(Ma) | Volts | # Grains |   |
|-------------|----|------------------------------------|--------------------------------------|----------------------|------|--------------------|---------|--------------------|---------|--------------------|---------|----------------|---------|---------|---------|---------|---------|----------------|-------------|-------------|-------|----------|---|
| 67LA        | BI | 61.9852                            | 141.8087                             | Beaver Lake area     | Lava | 112.97817          | 1.4044  | 0.02663            | 0.00748 | 0.03956            | 0.00223 | 10.3468        | 0.56981 | 0.04886 | 0.01372 | 0.00936 | 0.00106 | 101.26382      | 1.41893     | 24.41       | 0.34  | 0.84004  | 1 |
| 122LA       | WR | 61.4608                            | 141.15393                            | Klutlan Glacier area | Lava | 56.76085           | 0.44105 | 0.14776            | 0.00647 | 0.06873            | 0.00236 | 35.78048       | 1.20354 | 0.27114 | 0.01187 | 0.00052 | 0.00051 | 36.43628       | 0.74583     | 8.82        | 0.18  | 0.69001  | 1 |
| 123LA-B     | WR | 61.4869                            | 141.22655                            | Klutlan Glacier area | Lava | 51.81863           | 0.84059 | 0.37533            | 0.01587 | 0.04499            | 0.00339 | 25.61129       | 1.89304 | 0.68887 | 0.02913 | 0.0014  | 0.00096 | 38.53534       | 1.16501     | 9.33        | 0.28  | 0.27676  | 1 |
| 123LA-C     | WR | 61.4869                            | 141.22655                            | Klutlan Glacier area | Lava | 591.02204          | 1.67358 | 0.03607            | 0.00179 | 0.03106            | 0.00098 | 1.55258        | 0.04896 | 0.06618 | 0.00328 | 0.00033 | 0.0002  | 581.83156      | 1.67543     | 135.97      | 0.38  | 21.48054 | 1 |

Weighted average of J from standards = 1.241e-04 +/- 1.137e-06

| Sample name |    | UTM Easting or   | UTM Northing or   |                 |                      | 40Ar/39Ar | +/-      | 37Ar/39Ar | +/-     | 36Ar/39Ar | +/-     | % Atm.   | +/-     | Ca/K     | +/-     | Cl/K    | +/-     | 40*/39K   | +/-      | Age    | +/-  | Volts   | # Grains |
|-------------|----|------------------|-------------------|-----------------|----------------------|-----------|----------|-----------|---------|-----------|---------|----------|---------|----------|---------|---------|---------|-----------|----------|--------|------|---------|----------|
|             |    | Latitude N (deg) | Longitude W (deg) |                 |                      | meas.     | meas.    | meas.     | 40Ar    | 40Ar      | 40Ar    | 40Ar     | 40Ar    | 40Ar     | 40Ar    | 40Ar    | 40Ar    | 40Ar      | 40Ar     | (Ma)   | (Ma) |         |          |
| MB16-13     | WR | 07 v 0456226     | 6848156           | Solo Creek area | Flow below tillites  | 263.10058 | 11.584   | 3.64613   | 0.16567 | 0.62004   | 0.02987 | 69.53325 | 1.36622 | 6.70741  | 0.30555 | 0.01306 | 0.00357 | 80.35608  | 5.06016  | 17.88  | 1.12 | 0.62664 | 1        |
| MB16-15     | WR | 07 v 0458226     | 6848847           | Solo Creek area | Basalt/andesite lava | 108.12276 | 4.05274  | 7.11171   | 0.27149 | 0.28703   | 0.01443 | 77.92462 | 2.64435 | 13.11487 | 0.50318 | 0.00938 | 0.00247 | 23.98244  | 3.01612  | 5.36   | 0.67 | 0.26636 | 1        |
| MB16-18     | WR | 07 v 0458195     | 6848629           | Solo Creek area | Basalt/andesite lava | 78.32108  | 1.6842   | 4.18059   | 0.0918  | 0.13449   | 0.00667 | 50.32264 | 2.27135 | 7.69352  | 0.16943 | 0.00354 | 0.00167 | 39.0083   | 1.97567  | 8.7    | 0.44 | 0.3661  | 1        |
| 070416G     | WR | 62.01361         | 141.92137         |                 |                      | 565.8527  | 11.17283 | 5.97815   | 0.12097 | 0.04732   | 0.00782 | 2.38411  | 0.40559 | 11.01558 | 0.22384 | 0.01758 | 0.00242 | 554.67504 | 11.24181 | 119.97 | 2.35 | 2.09644 | 1        |

Weighted average of J from standards = 1.338e-04 +/- 1.605e-06

| Sample name |    | UTM Easting or<br>Latitude N (deg) | UTM Northing or<br>Longitude W (deg) |                   |                      | 40Ar/39Ar<br>meas. | +/-     | 37Ar/39Ar<br>meas. | +/-     | 36Ar/39Ar<br>meas. | +/-     | % Atm.<br>40Ar | +/-     | Ca/K     | +/-     | Cl/K    | +/-     | 40*/39K<br>+/- | Age<br>(Ma) | +/-<br>(Ma) | Volts | # Grains |   |
|-------------|----|------------------------------------|--------------------------------------|-------------------|----------------------|--------------------|---------|--------------------|---------|--------------------|---------|----------------|---------|----------|---------|---------|---------|----------------|-------------|-------------|-------|----------|---|
| 32LA        | PL | 61.88054                           | 141.03178                            | Rocker Creek area | Basalt/andesite lava | 101.68559          | 6.91491 | 6.49325            | 0.44795 | 0.0309             | 0.02397 | 8.45428        | 6.94187 | 11.96911 | 0.82952 | 0.01694 | 0.00658 | 93.49046       | 9.54462     | 22.4        | 2.27  | 0.12829  | 1 |
| 46LA        | WR | 61.8568                            | 141.07463                            | Rocker Creek area | Basalt/andesite lava | 289.24587          | 7.46373 | 3.76077            | 0.10101 | 0.62961            | 0.01917 | 64.22212       | 1.05882 | 6.91887  | 0.18632 | 0.02526 | 0.00273 | 103.75099      | 4.10283     | 24.84       | 0.98  | 0.82457  | 1 |
| 49LA        | WR | 61.89246                           | 141.01753                            | Rocker Creek area | Rhyolite lava        | 164.58776          | 2.09313 | 0.18531            | 0.01117 | 0.04579            | 0.00368 | 8.21387        | 0.6524  | 0.34006  | 0.0205  | 0.00267 | 0.00105 | 151.06125      | 2.20817     | 36.05       | 0.52  | 1.12262  | 1 |
| 53LA        | WR | 62.05035                           | 142.24463                            | Euchre Mountain   | Rhyolite tuff/flow   | 23.56587           | 0.3336  | 2.88418            | 0.04399 | 0.05445            | 0.00357 | 67.3564        | 4.38112 | 5.30288  | 0.08105 | 0.01373 | 0.00121 | 7.69875        | 1.03976     | 1.85        | 0.25  | 0.13742  | 1 |

**Notes:**

Phase dated abbreviation: BI-biotite, HO-hornblende, PL-plagioclase, WR-whole rock

Rock types are field-based descriptions prior to geochemical analyses reported in Brueseke et al. (2019) and Berkelhammer et al. (2019).
