# Supplementary material
Source: publisher figshare collection journal article supplement (https://gsapubs.figshare.com/articles/dataset/_/15167367)
Supplement: Supplementary file 5 [file 1]

Supplemental Item S12 - Detrital zircon U-Pb geochronologic analyses from modern river sediment, Wrangell Arc, Wrangell-St. Elias Mountains, Alaska-Canada

|                           |       |       |      |          |       | Isotope ratios |       |        |      |       | Apparent ages (Ma) |      |        |      |        |       |          |      |
|---------------------------|-------|-------|------|----------|-------|----------------|-------|--------|------|-------|--------------------|------|--------|------|--------|-------|----------|------|
| Analysis                  | U     | 206Pb | U/Th | 206Pb*   | ±     | 207Pb*         | ±     | 206Pb* | ±    | error | 206Pb*             | ±    | 207Pb* | ±    | 206Pb* | ±     | Best age | ±    |
|                           | (ppm) | 204Pb |      | 207Pb*   | (%)   | 235U*          | (%)   | 238U   | (%)  | corr. | 238U*              | (Ma) | 235U   | (Ma) | 207Pb* | (Ma)  | (Ma)     | (Ma) |
| Boulder- Creek            |       |       |      |          |       |                |       |        |      |       |                    |      |        |      |        |       |          |      |
| Boulder-307               | 156   | 20    | 1.1  | 2.0000   | 1.4   | 0.0009         | 18.5  | 0.0000 | 18.4 | 1.00  | 0.1                | 0.0  | 0.9    | 0.2  | NA     | NA    | 0.1      | 0.0  |
| Boulder-1                 | 127   | 20    | 1.1  | 2.0000   | 50.0  | 0.0010         | 53.4  | 0.0000 | 18.8 | 0.35  | 0.1                | 0.0  | 1.0    | 0.5  | NA     | NA    | 0.1      | 0.0  |
| Boulder-125               | 102   | 20    | 2.9  | 2.0000   | 105.3 | 0.0012         | 107.3 | 0.0000 | 20.7 | 0.19  | 0.1                | 0.0  | 1.2    | 1.3  | NA     | NA    | 0.1      | 0.0  |
| Boulder-remount Spot 44   | 1043  | 20    | 0.6  | 2.0000   | 0.0   | 0.0017         | 9.1   | 0.0000 | 9.1  | 1.00  | 0.2                | 0.0  | 1.7    | 0.2  | NA     | NA    | 0.2      | 0.0  |
| Boulder- 103              | 157   | 20    | 2.2  | 2.0000   | 95.9  | 0.0021         | 97.5  | 0.0000 | 17.4 | 0.18  | 0.2                | 0.0  | 2.1    | 2.1  | NA     | NA    | 0.2      | 0.0  |
| Boulder- 315              | 154   | 208   | 1.7  | 2.1588   | 38.9  | 0.0029         | 45.8  | 0.0000 | 24.1 | 0.53  | 0.3                | 0.1  | 3.0    | 1.4  | NA     | NA    | 0.3      | 0.1  |
| Boulder- 114              | 978   | 183   | 0.6  | 37.8648  | 28.7  | 0.0003         | 29.2  | 0.0001 | 5.4  | 0.18  | 0.6                | 0.0  | 0.3    | 0.1  | NA     | NA    | 0.6      | 0.0  |
| Boulder- 33               | 81    | 89    | 2.1  | 5.5192   | 8.9   | 0.0023         | 23.5  | 0.0001 | 21.8 | 0.93  | 0.6                | 0.1  | 2.3    | 0.5  | NA     | NA    | 0.6      | 0.1  |
| Boulder- 14               | 690   | 136   | 2.0  | 21.2942  | 11.2  | 0.0006         | 13.3  | 0.0001 | 7.1  | 0.54  | 0.6                | 0.0  | 0.6    | 0.1  | 47.2   | 267.6 | 0.6      | 0.0  |
| Boulder- 25               | 1676  | 420   | 1.4  | 30.4895  | 11.1  | 0.0004         | 11.7  | 0.0001 | 3.8  | 0.33  | 0.6                | 0.0  | 0.4    | 0.1  | NA     | NA    | 0.6      | 0.0  |
| Boulder remount Spot 86   | 1957  | 663   | 0.9  | 8.5640   | 15.2  | 0.0018         | 15.8  | 0.0001 | 4.2  | 0.27  | 0.7                | 0.0  | 1.8    | 0.3  | 1907.3 | 275.1 | 0.7      | 0.0  |
| Boulder- 11               | 1398  | 275   | 2.0  | 134.1376 | 223.5 | 0.0001         | 223.5 | 0.0001 | 4.6  | 0.02  | 0.8                | 0.0  | 0.1    | 0.3  | NA     | NA    | 0.8      | 0.0  |
| Boulder- 126              | 230   | 215   | 1.9  | 109.3491 | 93.7  | 0.0002         | 94.2  | 0.0001 | 8.9  | 0.09  | 0.8                | 0.1  | 0.2    | 0.1  | NA     | NA    | 0.8      | 0.1  |
| Boulder- 21               | 120   | 218   | 2.5  | 58.5735  | 35.1  | 0.0013         | 35.8  | 0.0005 | 7.1  | 0.20  | 3.5                | 0.2  | 1.3    | 0.5  | NA     | NA    | 3.5      | 0.2  |
| Boulder- 15               | 82    | 175   | 2.3  | 21.3796  | 89.9  | 0.0037         | 90.1  | 0.0006 | 5.9  | 0.07  | 3.7                | 0.2  | 3.7    | 3.4  | 37.7   | NA    | 3.7      | 0.2  |
| Boulder- 303              | 171   | 231   | 1.7  | 86.6889  | 17.9  | 0.0009         | 19.0  | 0.0006 | 6.3  | 0.33  | 3.8                | 0.2  | 0.9    | 0.2  | NA     | NA    | 3.8      | 0.2  |
| Boulder- 27               | 140   | 155   | 1.7  | 21.2123  | 120.2 | 0.0038         | 120.4 | 0.0006 | 5.7  | 0.05  | 3.8                | 0.2  | 3.9    | 4.6  | 56.5   | NA    | 3.8      | 0.2  |
| Boulder- 157              | 182   | 409   | 2.2  | 57.4718  | 36.4  | 0.0014         | 36.7  | 0.0006 | 4.6  | 0.13  | 3.8                | 0.2  | 1.4    | 0.5  | NA     | NA    | 3.8      | 0.2  |
| Boulder- 153              | 155   | 504   | 2.2  | 26.5966  | 20.5  | 0.0033         | 21.1  | 0.0006 | 5.0  | 0.23  | 4.1                | 0.2  | 3.3    | 0.7  | NA     | NA    | 4.1      | 0.2  |
| Boulder- 200              | 261   | 743   | 2.2  | 30.9227  | 6.8   | 0.0037         | 7.3   | 0.0008 | 2.8  | 0.39  | 5.4                | 0.2  | 3.8    | 0.3  | NA     | NA    | 5.4      | 0.2  |
| Boulder- 165              | 113   | 289   | 2.9  | 77.0445  | 50.8  | 0.0015         | 51.1  | 0.0008 | 5.0  | 0.10  | 5.4                | 0.3  | 1.5    | 0.8  | NA     | NA    | 5.4      | 0.3  |
| Boulder- remount Spot 12  | 194   | 630   | 1.0  | 33.9242  | 12.2  | 0.0035         | 13.0  | 0.0008 | 4.6  | 0.35  | 5.5                | 0.3  | 3.5    | 0.5  | NA     | NA    | 5.5      | 0.3  |
| Boulder- 8                | 98    | 104   | 1.6  | 9.4562   | 36.4  | 0.0132         | 36.7  | 0.0009 | 4.7  | 0.13  | 5.8                | 0.3  | 13.3   | 4.8  | 1727.4 | 693.8 | 5.8      | 0.3  |
| Boulder- remount Spot 67  | 84    | 178   | 1.6  | 34.0222  | 33.1  | 0.0037         | 33.5  | 0.0009 | 5.1  | 0.15  | 5.9                | 0.3  | 3.7    | 1.3  | NA     | NA    | 5.9      | 0.3  |
| Boulder- 291              | 336   | 1385  | 3.5  | 21.3370  | 6.6   | 0.0063         | 7.4   | 0.0010 | 3.3  | 0.45  | 6.3                | 0.2  | 6.4    | 0.5  | 42.4   | 157.4 | 6.3      | 0.2  |
| Boulder- 159              | 47    | 112   | 3.0  | 96.2093  | 110.1 | 0.0014         | 110.3 | 0.0010 | 6.5  | 0.06  | 6.3                | 0.4  | 1.4    | 1.6  | NA     | NA    | 6.3      | 0.4  |
| Boulder- remount Spot 71  | 114   | 173   | 1.3  | 39.9334  | 17.8  | 0.0035         | 18.4  | 0.0010 | 4.7  | 0.26  | 6.5                | 0.3  | 3.5    | 0.6  | NA     | NA    | 6.5      | 0.3  |
| Boulder- 184              | 108   | 153   | 1.6  | 22.7298  | 19.9  | 0.0061         | 20.7  | 0.0010 | 5.8  | 0.28  | 6.5                | 0.4  | 6.2    | 1.3  | NA     | NA    | 6.5      | 0.4  |
| Boulder- 26               | 484   | 856   | 1.9  | 22.5459  | 20.4  | 0.0063         | 20.6  | 0.0010 | 3.0  | 0.15  | 6.6                | 0.2  | 6.4    | 1.3  | NA     | NA    | 6.6      | 0.2  |
| Boulder- remount Spot 55  | 121   | 169   | 2.7  | 50.7029  | 82.9  | 0.0029         | 83.0  | 0.0011 | 2.9  | 0.03  | 6.8                | 0.2  | 2.9    | 2.4  | NA     | NA    | 6.8      | 0.2  |
| Boulder- remount Spot 29  | 796   | 1377  | 0.9  | 14.3443  | 3.6   | 0.0103         | 4.6   | 0.0011 | 2.9  | 0.62  | 6.9                | 0.2  | 10.4   | 0.5  | 920.0  | 74.5  | 6.9      | 0.2  |
| Boulder- 39               | 572   | 4736  | 1.3  | 21.3557  | 3.9   | 0.0070         | 4.7   | 0.0011 | 2.6  | 0.55  | 7.0                | 0.2  | 7.1    | 0.3  | 40.4   | 93.8  | 7.0      | 0.2  |
| Boulder- 166              | 579   | 68037 | 1.0  | 14.0854  | 4.8   | 0.0106         | 5.7   | 0.0011 | 3.1  | 0.54  | 7.0                | 0.2  | 10.7   | 0.6  | 957.3  | 97.5  | 7.0      | 0.2  |
| Boulder- 93               | 179   | 3600  | 2.7  | 21.8187  | 5.9   | 0.0070         | 7.6   | 0.0011 | 4.9  | 0.64  | 7.2                | 0.4  | 7.1    | 0.5  | NA     | NA    | 7.2      | 0.4  |
| Boulder- 311              | 304   | 2159  | 5.4  | 24.6587  | 2.3   | 0.0442         | 3.6   | 0.0079 | 2.7  | 0.76  | 50.8               | 1.4  | 43.9   | 1.5  | NA     | NA    | 50.8     | 1.4  |
| Boulder- 16               | 322   | 3690  | 4.3  | 22.8588  | 2.1   | 0.0490         | 4.2   | 0.0081 | 3.6  | 0.87  | 52.2               | 1.9  | 48.6   | 2.0  | NA     | NA    | 52.2     | 1.9  |
| Boulder- 136              | 953   | 14603 | 3.5  | 21.2966  | 1.4   | 0.0528         | 3.4   | 0.0082 | 3.1  | 0.92  | 52.3               | 1.6  | 52.2   | 1.7  | 47.0   | 32.6  | 52.3     | 1.6  |
| Boulder- 168              | 453   | 3274  | 8.1  | 18.0215  | 4.8   | 0.0636         | 5.8   | 0.0083 | 3.3  | 0.57  | 53.4               | 1.8  | 62.6   | 3.5  | 432.0  | 107.3 | 53.4     | 1.8  |
| Boulder- 313              | 142   | 4787  | 3.2  | 20.6275  | 4.4   | 0.0678         | 5.7   | 0.0102 | 3.6  | 0.63  | 65.1               | 2.3  | 66.6   | 3.7  | 122.7  | 104.4 | 65.1     | 2.3  |
| Boulder- 140              | 426   | 2833  | 4.0  | 20.3894  | 2.7   | 0.0745         | 4.5   | 0.0110 | 3.6  | 0.81  | 70.6               | 2.5  | 72.9   | 3.2  | 150.0  | 62.2  | 70.6     | 2.5  |
| Boulder- 19               | 470   | 64007 | 3.1  | 20.3792  | 1.2   | 0.0792         | 3.5   | 0.0117 | 3.3  | 0.94  | 75.1               | 2.5  | 77.4   | 2.6  | 151.1  | 28.5  | 75.1     | 2.5  |
| Boulder- 250              | 932   | 59661 | 6.2  | 20.5943  | 1.2   | 0.0790         | 3.2   | 0.0118 | 3.0  | 0.92  | 75.7               | 2.2  | 77.2   | 2.4  | 126.5  | 29.2  | 75.7     | 2.2  |
| Boulder- 128              | 234   | 10609 | 2.9  | 20.4022  | 2.1   | 0.1232         | 3.9   | 0.0182 | 3.3  | 0.85  | 116.6              | 3.8  | 118.0  | 4.3  | 148.5  | 48.2  | 116.6    | 3.8  |
| Boulder- 148              | 88    | 9627  | 2.1  | 20.5619  | 2.0   | 0.1235         | 3.2   | 0.0184 | 2.4  | 0.77  | 117.7              | 2.8  | 118.3  | 3.5  | 130.2  | 47.6  | 117.7    | 2.8  |
| Boulder- 106              | 53    | 644   | 4.7  | 33.1448  | 28.7  | 0.0783         | 28.8  | 0.0188 | 2.5  | 0.09  | 120.2              | 2.9  | 76.5   | 21.2 | NA     | NA    | 120.2    | 2.9  |
| Boulder- 283              | 76    | 1560  | 3.5  | 24.7532  | 3.9   | 0.1050         | 5.1   | 0.0189 | 3.3  | 0.64  | 120.4              | 3.9  | 101.4  | 4.9  | NA     | NA    | 120.4    | 3.9  |
| Boulder- 2                | 103   | 2561  | 3.5  | 22.6533  | 2.3   | 0.1204         | 3.3   | 0.0198 | 2.3  | 0.72  | 126.3              | 2.9  | 115.4  | 3.6  | NA     | NA    | 126.3    | 2.9  |
| Boulder- remount Spot 104 | 108   | 1068  | 3.0  | 29.1579  | 3.7   | 0.0957         | 4.5   | 0.0202 | 2.7  | 0.59  | 129.2              | 3.4  | 92.8   | 4.0  | NA     | NA    | 129.2    | 3.4  |
| Boulder- 302              | 209   | 12964 | 2.4  | 20.7772  | 1.4   | 0.1346         | 3.3   | 0.0203 | 3.0  | 0.91  | 129.5              | 3.9  | 128.2  | 4.0  | 105.6  | 32.0  | 129.5    | 3.9  |
| Boulder- 122              | 170   | 4638  | 3.1  | 21.3936  | 3.8   | 0.1312         | 5.6   | 0.0204 | 4.2  | 0.74  | 130.0              | 5.4  | 125.2  | 6.6  | 36.1   | 89.9  | 130.0    | 5.4  |
| Boulder- 296              | 125   | 6126  | 2.5  | 19.3954  | 2.6   | 0.1449         | 4.1   | 0.0204 | 3.2  | 0.78  | 130.1              | 4.1  | 137.4  | 5.3  | 265.9  | 59.1  | 130.1    | 4.1  |
| Boulder- 37               | 166   | 7021  | 2.2  | 20.6819  | 1.8   | 0.1361         | 3.8   | 0.0204 | 3.4  | 0.88  | 130.4              | 4.3  | 129.6  | 4.7  | 116.5  | 42.9  | 130.4    | 4.3  |
| Boulder- 312              | 88    | 1125  | 2.7  | 27.0218  | 2.4   | 0.1046         | 3.6   | 0.0205 | 2.7  | 0.74  | 130.9              | 3.5  | 101.0  | 3.5  | NA     | NA    | 130.9    | 3.5  |
| Boulder- remount Spot 82  | 86    | 2144  | 2.3  | 23.1138  | 2.4   | 0.1229         | 3.0   | 0.0206 | 1.8  | 0.59  | 131.5              | 2.3  | 117.7  | 3.3  | NA     | NA    | 131.5    | 2.3  |
| Boulder- 230              | 99    | 2120  | 2.8  | 23.0027  | 5.2   | 0.1237         | 5.7   | 0.0206 | 2.3  | 0.41  | 131.7              | 3.0  | 118.4  | 6.4  | NA     | NA    | 131.7    | 3.0  |
| Boulder- 134              | 152   | 16901 | 1.8  | 20.9360  | 1.6   | 0.1373         | 2.9   | 0.0209 | 2.4  | 0.84  | 133.1              | 3.2  | 130.7  | 3.6  | 87.7   | 37.0  | 133.1    | 3.2  |
| Boulder- remount Spot 107 | 161   | 3545  | 2.8  | 19.1382  | 2.    |                |       |        |      |       |                    |      |        |      |        |       |          |      |

|                            |      |          |      |         |      |        |      |        |     |      |        |      |        |      |        |       |        |      |
|----------------------------|------|----------|------|---------|------|--------|------|--------|-----|------|--------|------|--------|------|--------|-------|--------|------|
| Boulder- 131               | 224  | 6752     | 3.6  | 20.6944 | 1.8  | 0.1547 | 3.5  | 0.0232 | 3.0 | 0.86 | 148.0  | 4.4  | 146.0  | 4.7  | 115.1  | 42.3  | 148.0  | 4.4  |
| Boulder- 18                | 149  | 1620     | 4.8  | 24.6168 | 11.5 | 0.1307 | 12.2 | 0.0234 | 4.0 | 0.33 | 148.8  | 5.9  | 124.8  | 14.4 | NA     | NA    | 148.8  | 5.9  |
| Boulder- 29                | 66   | 30988    | 2.5  | 19.8622 | 2.1  | 0.1637 | 3.9  | 0.0236 | 3.3 | 0.84 | 150.4  | 4.9  | 154.0  | 5.6  | 211.0  | 48.9  | 150.4  | 4.9  |
| Boulder- 175               | 85   | 1315     | 3.2  | 25.4111 | 4.4  | 0.1281 | 5.2  | 0.0236 | 2.8 | 0.55 | 150.5  | 4.2  | 122.4  | 6.0  | NA     | NA    | 150.5  | 4.2  |
| Boulder- 113               | 47   | 1671     | 4.4  | 22.7834 | 10.5 | 0.1441 | 11.0 | 0.0238 | 3.1 | 0.28 | 151.7  | 4.7  | 136.7  | 14.0 | NA     | NA    | 151.7  | 4.7  |
| Boulder- 194               | 228  | 10581    | 4.4  | 20.7775 | 1.7  | 0.1580 | 2.9  | 0.0238 | 2.4 | 0.81 | 151.7  | 3.6  | 148.9  | 4.1  | 105.6  | 40.9  | 151.7  | 3.6  |
| Boulder- 28                | 96   | 10101    | 1.8  | 20.3640 | 2.4  | 0.1616 | 3.7  | 0.0239 | 2.8 | 0.77 | 152.1  | 4.3  | 152.1  | 5.2  | 152.9  | 55.2  | 152.1  | 4.3  |
| Boulder- 288               | 68   | 2181     | 3.5  | 23.0954 | 2.7  | 0.1436 | 3.9  | 0.0241 | 2.8 | 0.72 | 153.3  | 4.3  | 136.2  | 5.0  | NA     | NA    | 153.3  | 4.3  |
| Boulder- 123               | 94   | 2531     | 3.5  | 22.8387 | 3.5  | 0.1456 | 4.5  | 0.0241 | 2.8 | 0.62 | 153.7  | 4.3  | 138.0  | 5.8  | NA     | NA    | 153.7  | 4.3  |
| Boulder- 212               | 1136 | 44897    | 15.1 | 19.9317 | 1.2  | 0.1698 | 3.8  | 0.0246 | 3.6 | 0.95 | 156.4  | 5.6  | 159.3  | 5.6  | 203.0  | 27.9  | 156.4  | 5.6  |
| Boulder- 162               | 95   | 20813    | 6.8  | 19.6669 | 2.2  | 0.1754 | 3.9  | 0.0250 | 3.2 | 0.83 | 159.4  | 5.1  | 164.1  | 5.9  | 233.9  | 49.8  | 159.4  | 5.1  |
| Boulder- remount Spot 76   | 89   | 1930     | 2.5  | 24.6019 | 1.8  | 0.1409 | 3.9  | 0.0251 | 3.5 | 0.88 | 160.1  | 5.5  | 133.8  | 4.9  | NA     | NA    | 160.1  | 5.5  |
| Boulder- 287               | 149  | 9662     | 3.9  | 20.0729 | 1.9  | 0.1754 | 2.9  | 0.0256 | 2.1 | 0.74 | 162.7  | 3.4  | 164.1  | 4.4  | 186.5  | 44.8  | 162.7  | 3.4  |
| Boulder- 158               | 138  | 5902     | 3.7  | 19.8606 | 1.8  | 0.1973 | 3.3  | 0.0284 | 2.8 | 0.84 | 180.7  | 5.0  | 182.8  | 5.6  | 211.2  | 42.4  | 180.7  | 5.0  |
| Boulder- 112               | 207  | 731204   | 3.5  | 18.2711 | 1.5  | 0.3502 | 3.8  | 0.0464 | 3.5 | 0.93 | 292.6  | 10.1 | 304.9  | 10.1 | 401.2  | 32.5  | 292.6  | 10.1 |
| Boulder- 154               | 437  | 23091    | 1.8  | 19.4796 | 1.4  | 0.3301 | 3.2  | 0.0467 | 2.9 | 0.90 | 294.0  | 8.2  | 289.7  | 8.0  | 255.9  | 31.2  | 294.0  | 8.2  |
| Boulder- 119               | 1249 | 16047737 | 3.8  | 19.1446 | 0.8  | 0.3379 | 2.2  | 0.0469 | 2.0 | 0.92 | 295.7  | 5.8  | 295.6  | 5.5  | 295.7  | 19.1  | 295.7  | 5.8  |
| Boulder- 305               | 998  | 37852    | 1.8  | 19.0525 | 1.2  | 0.3432 | 3.0  | 0.0474 | 2.8 | 0.92 | 298.8  | 8.1  | 299.6  | 7.8  | 306.7  | 27.0  | 298.8  | 8.1  |
| Boulder- remount Spot 54   | 374  | 15923    | 3.0  | 19.6878 | 1.1  | 0.3329 | 3.1  | 0.0476 | 2.9 | 0.93 | 299.5  | 8.4  | 291.8  | 7.8  | 231.4  | 26.2  | 299.5  | 8.4  |
| Boulder- 289               | 314  | 8338     | 2.0  | 19.1997 | 1.2  | 0.3416 | 3.4  | 0.0476 | 3.1 | 0.93 | 299.7  | 9.2  | 298.4  | 8.7  | 289.1  | 28.1  | 299.7  | 9.2  |
| Boulder- 101               | 297  | 7375     | 2.5  | 19.2715 | 1.0  | 0.3425 | 3.0  | 0.0479 | 2.8 | 0.94 | 301.6  | 8.3  | 299.1  | 7.8  | 280.6  | 23.0  | 301.6  | 8.3  |
| Boulder- remount Spot 10   | 430  | 20069    | 5.9  | 19.1390 | 1.3  | 0.3454 | 3.3  | 0.0480 | 3.0 | 0.92 | 302.0  | 8.9  | 301.2  | 8.6  | 296.3  | 29.6  | 302.0  | 8.9  |
| Boulder- 92                | 169  | 6470     | 1.8  | 19.0491 | 1.8  | 0.3480 | 3.6  | 0.0481 | 3.1 | 0.87 | 302.8  | 9.2  | 303.2  | 9.3  | 307.1  | 39.9  | 302.8  | 9.2  |
| Boulder- 102               | 763  | 59476    | 3.7  | 19.1181 | 1.0  | 0.3472 | 2.4  | 0.0482 | 2.2 | 0.92 | 303.2  | 6.6  | 302.6  | 6.4  | 298.8  | 22.0  | 303.2  | 6.6  |
| Boulder- remount Spot 68   | 581  | 36983    | 1.8  | 19.3186 | 1.1  | 0.3469 | 2.6  | 0.0486 | 2.4 | 0.91 | 306.1  | 7.2  | 302.4  | 6.9  | 275.0  | 24.3  | 306.1  | 7.2  |
| Boulder- 115               | 222  | 10318    | 3.8  | 19.7687 | 1.4  | 0.3391 | 3.2  | 0.0486 | 2.8 | 0.89 | 306.1  | 8.5  | 296.5  | 8.2  | 222.0  | 33.0  | 306.1  | 8.5  |
| Boulder- 208               | 386  | 38792    | 2.1  | 18.9709 | 1.4  | 0.3535 | 2.7  | 0.0487 | 2.3 | 0.86 | 306.3  | 6.8  | 307.3  | 7.1  | 316.4  | 31.1  | 306.3  | 6.8  |
| Boulder- remount Spot 81   | 525  | 17160    | 2.2  | 19.3168 | 1.2  | 0.3482 | 3.1  | 0.0488 | 2.8 | 0.92 | 307.1  | 8.5  | 303.3  | 8.1  | 275.2  | 27.5  | 307.1  | 8.5  |
| Boulder- 94                | 149  | 6624     | 2.8  | 19.6429 | 2.5  | 0.3424 | 4.0  | 0.0488 | 3.1 | 0.78 | 307.2  | 9.3  | 299.0  | 10.3 | 236.7  | 57.6  | 307.2  | 9.3  |
| Boulder- 139               | 541  | 149998   | 2.0  | 19.0292 | 1.0  | 0.3535 | 3.0  | 0.0488 | 2.8 | 0.94 | 307.2  | 8.5  | 307.4  | 8.0  | 309.4  | 23.6  | 307.2  | 8.5  |
| Boulder- 96                | 230  | 16571    | 4.0  | 19.2227 | 1.4  | 0.3513 | 3.7  | 0.0490 | 3.5 | 0.93 | 308.4  | 10.5 | 305.7  | 9.9  | 286.4  | 31.0  | 308.4  | 10.5 |
| Boulder- 31                | 98   | 3494     | 1.9  | 20.6173 | 4.6  | 0.3284 | 5.2  | 0.0491 | 2.4 | 0.47 | 309.1  | 7.3  | 288.3  | 13.0 | 123.8  | 108.2 | 309.1  | 7.3  |
| Boulder- 108               | 288  | 95149    | 4.4  | 18.7527 | 1.4  | 0.3613 | 3.9  | 0.0492 | 3.6 | 0.93 | 309.4  | 10.9 | 313.2  | 10.4 | 342.7  | 31.7  | 309.4  | 10.9 |
| Boulder- remount Spot 30   | 303  | 15754    | 2.1  | 19.4884 | 1.2  | 0.3486 | 3.1  | 0.0493 | 2.8 | 0.92 | 310.1  | 8.6  | 303.6  | 8.1  | 254.9  | 27.5  | 310.1  | 8.6  |
| Boulder- remount Spot 100  | 192  | 266947   | 1.9  | 19.3367 | 1.1  | 0.3514 | 2.9  | 0.0493 | 2.7 | 0.93 | 310.2  | 8.3  | 305.8  | 7.7  | 272.8  | 24.2  | 310.2  | 8.3  |
| Boulder- remount Spot 84   | 332  | 102984   | 3.1  | 19.1945 | 1.5  | 0.3542 | 3.3  | 0.0493 | 2.9 | 0.89 | 310.4  | 8.9  | 307.9  | 8.8  | 289.7  | 34.7  | 310.4  | 8.9  |
| Boulder- 147               | 550  | 53128    | 2.5  | 19.2299 | 1.1  | 0.3538 | 2.9  | 0.0494 | 2.7 | 0.92 | 310.6  | 8.1  | 307.6  | 7.7  | 285.5  | 25.4  | 310.6  | 8.1  |
| Boulder- 300               | 298  | 85375    | 3.9  | 18.8322 | 1.2  | 0.3614 | 4.0  | 0.0494 | 3.8 | 0.96 | 310.7  | 11.5 | 313.2  | 10.7 | 333.1  | 26.3  | 310.7  | 11.5 |
| Boulder- 82                | 501  | 34533    | 4.7  | 18.9488 | 1.1  | 0.3595 | 2.7  | 0.0494 | 2.5 | 0.91 | 311.0  | 7.5  | 311.9  | 7.3  | 319.1  | 25.7  | 311.0  | 7.5  |
| Boulder- 142               | 395  | 31565    | 1.9  | 19.0456 | 1.4  | 0.3591 | 3.2  | 0.0496 | 2.9 | 0.90 | 312.2  | 8.8  | 311.6  | 8.6  | 307.5  | 31.9  | 312.2  | 8.8  |
| Boulder- 195               | 587  | 34675    | 2.1  | 18.9601 | 1.1  | 0.3608 | 3.0  | 0.0496 | 2.8 | 0.94 | 312.3  | 8.6  | 312.8  | 8.1  | 317.7  | 24.0  | 312.3  | 8.6  |
| Boulder- remount Spot 43   | 19   | 1270     | 3.0  | 22.9685 | 2.9  | 0.3178 | 4.5  | 0.0530 | 3.4 | 0.77 | 332.7  | 11.2 | 280.2  | 11.0 | NA     | NA    | 332.7  | 11.2 |
| Boulder- 17                | 204  | 6970     | 9.2  | 18.8468 | 2.2  | 0.4223 | 4.1  | 0.0578 | 3.4 | 0.84 | 361.9  | 12.1 | 357.7  | 12.3 | 331.3  | 50.7  | 361.9  | 12.1 |
| Boulder- 135               | 23   | 1166     | 2.0  | 22.8757 | 3.9  | 0.3608 | 4.8  | 0.0599 | 2.8 | 0.58 | 374.9  | 10.2 | 312.8  | 12.9 | NA     | NA    | 374.9  | 10.2 |
| Boulder- 179               | 357  | 301047   | 2.1  | 15.5515 | 1.4  | 0.9358 | 3.6  | 0.1056 | 3.4 | 0.93 | 647.1  | 20.7 | 670.7  | 17.8 | 751.6  | 28.8  | 647.1  | 20.7 |
| Boulder- 38                | 165  | 51534    | 3.2  | 9.7219  | 1.1  | 4.1388 | 2.5  | 0.2920 | 2.2 | 0.90 | 1651.3 | 32.6 | 1662.0 | 20.4 | 1676.4 | 20.3  | 1676.4 | 20.3 |
| <b>Chetaslina River</b>    |      |          |      |         |      |        |      |        |     |      |        |      |        |      |        |       |        |      |
| Chetaslina-Spot 26         | 135  | 1164     | 1.4  | 22.2523 | 15.8 | 0.0040 | 16.7 | 0.0006 | 5.2 | 0.31 | 4.2    | 0.2  | 4.1    | 0.7  | 58.9   | 387.5 | 4.2    | 0.2  |
| Chetaslinataslina-Spot 104 | 389  | 9936     | 3.5  | 21.8388 | 3.2  | 0.0519 | 3.3  | 0.0082 | 0.9 | 0.27 | 52.8   | 0.5  | 51.4   | 1.7  | 13.4   | 77.3  | 52.8   | 0.5  |
| Chetaslina-Spot 73         | 347  | 42488    | 2.0  | 20.4176 | 2.4  | 0.1459 | 2.6  | 0.0216 | 1.0 | 0.38 | 137.8  | 1.3  | 138.3  | 3.3  | 146.8  | 56.0  | 137.8  | 1.3  |
| Chetaslina-Spot 65         | 161  | 68151    | 3.5  | 20.1818 | 3.1  | 0.1518 | 3.4  | 0.0222 | 1.3 | 0.39 | 141.7  | 1.9  | 143.5  | 4.6  | 173.9  | 73.4  | 141.7  | 1.9  |
| Chetaslina-Spot 23         | 178  | 30107    | 2.9  | 19.7706 | 4.2  | 0.1554 | 4.3  | 0.0223 | 1.2 | 0.28 | 142.0  | 1.7  | 146.6  | 5.9  | 221.8  | 96.5  | 142.0  | 1.7  |
| Chetaslina-Spot 41         | 67   | 4439     | 3.4  | 20.0998 | 4.9  | 0.1529 | 5.2  | 0.0223 | 1.7 | 0.32 | 142.1  | 2.4  | 144.5  | 7.0  | 183.4  | 115.2 | 142.1  | 2.4  |
| Chetaslina-Spot 1          | 203  | 30120    | 3.7  | 20.8747 | 2.7  | 0.1475 | 3.0  | 0.0223 | 1.1 | 0.38 | 142.3  | 1.6  | 139.7  | 3.9  | 94.6   | 64.9  | 142.3  | 1.6  |
| Chetaslina-Spot 103        | 185  | 28548    | 3.3  | 17.5965 | 5.0  | 0.1754 | 5.1  | 0.0224 | 1.1 | 0.21 | 142.7  | 1.5  | 164.1  | 7.7  | 484.9  | 110.0 | 142.7  | 1.5  |
| Chetaslina-Spot 88         | 400  | 25398    | 2.2  | 19.2246 | 2.2  | 0.1607 | 2.5  | 0.0224 | 1.1 | 0.43 | 142.9  | 1.5  | 151.4  | 3.4  | 286.2  | 50.6  | 142.9  | 1.5  |
| Chetaslina-Spot 45         | 148  | 23154    | 1.3  | 20.6412 | 3.8  | 0.1502 | 4.0  | 0.0225 | 1.1 | 0.27 | 143.4  | 1.5  | 142.1  | 5.3  | 121.1  | 90.3  | 143.4  | 1.5  |
| Chetaslina-Spot 18         | 159  | 39340    | 3.5  | 19.1295 | 3.4  | 0.1622 | 3.7  | 0.0225 | 1.4 | 0.38 | 143.5  | 2.0  | 152.6  | 5.2  | 297.5  | 77.7  | 143.5  | 2.0  |
| Chetaslina-Spot 90         | 190  | 13669    | 3.9  | 19.9426 | 3.0  | 0.1557 | 3.2  | 0.0225 | 1.1 | 0.35 | 143.6  | 1.6  | 147.0  | 4.3  | 201.7  | 69.0  | 143.6  | 1.6  |
| Chetaslina-Spot 108        | 173  | 8586     | 2.5  | 20.7804 | 3.3  | 0.1495 | 3.4  | 0.0225 | 1.0 | 0.30 | 143.6  | 1.5  | 141.4  | 4.5  | 105.3  | 77.6  | 143.6  | 1.5  |
| Chetaslina-Spot 22         | 135  | 13818    | 4.2  | 20.8087 | 2.6  | 0.1494 | 2.9  | 0.0225 | 1.3 | 0.45 | 143.7  | 1.9  | 141.4  | 3.9  | 102.1  | 62.2  | 143.7  | 1.9  |
| Chetaslina-Spot 99         | 99   | 76732    | 3.7  | 19.6404 | 3.3  | 0.1585 | 3.6  | 0.0226 | 1.5 | 0.41 | 143.9  | 2.1  | 149.4  | 5.0  | 237.0  | 75.8  | 143.9  | 2.1  |
| Chetaslina-Spot 30         | 64   | 11647    | 5.5  | 20.1221 | 4.9  | 0.1548 | 5.2  | 0.0226 | 1.9 | 0.37 | 144.1  | 2.8  | 146.2  | 7.1  | 180.8  | 113.5 | 144.1  | 2.8  |
| Chetaslina-Spot 75         | 112  | 35811    | 3.2  | 20.1334 | 3.3  | 0.1549 | 3.6  | 0.0226 | 1.3 | 0.37 | 144.2  | 1.9  | 146.2  | 4.9  | 179.5  | 78.0  | 144.2  | 1.9  |
| Chetaslina-Spot 61         | 148  | 9414     | 2.9  | 20.6257 | 3.0  | 0.1514 | 3.4  | 0.0226 | 1.5 | 0.45 | 144.4  | 2.2  | 143.2  | 4.6  | 122.9  | 71.7  | 144.4  | 2.2  |
| Chetaslina-Spot 92         | 122  | 11574    | 2.7  | 19.7688 | 3.4  | 0.1582 | 3.6  | 0.0227 | 1.2 | 0.33 | 144.6  | 1.7  | 149.2  | 5.0  | 222.0  | 78.9  | 144.6  | 1.7  |
| Chetaslina-Spot 96         | 107  | 16418    | 3.6  | 20.5921 | 2.8  | 0.1519 | 3.1  | 0.0227 | 1.4 | 0.45 | 144.6  | 2.0  | 143.6  | 4.2  | 126.8  | 65.6  | 144.6  | 2.0  |
| Chetaslina-Spot 110        | 60   | 66372    | 5.7  | 18.6769 | 4.5  | 0.1675 | 4.7  | 0.0227 | 1.6 | 0.34 | 144.7  | 2.3  | 157.3  | 6.9  | 351.8  | 100.6 | 1      |      |

|                     |     |        |     |         |     |        |     |        |     |      |       |     |       |     |       |       |       |     |
|---------------------|-----|--------|-----|---------|-----|--------|-----|--------|-----|------|-------|-----|-------|-----|-------|-------|-------|-----|
| Chetaslina-Spot 49  | 89  | 19516  | 3.6 | 20.0321 | 3.6 | 0.1571 | 3.8 | 0.0228 | 1.4 | 0.37 | 145.5 | 2.1 | 148.2 | 5.3 | 191.3 | 83.1  | 145.5 | 2.1 |
| Chetaslina-Spot 24  | 61  | 2652   | 6.0 | 21.8796 | 4.3 | 0.1438 | 4.6 | 0.0228 | 1.7 | 0.36 | 145.5 | 2.4 | 136.4 | 5.9 | 17.9  | 103.5 | 145.5 | 2.4 |
| Chetaslina-Spot 102 | 503 | 29588  | 2.1 | 20.1291 | 1.9 | 0.1565 | 2.2 | 0.0228 | 1.1 | 0.50 | 145.6 | 1.6 | 147.6 | 3.0 | 180.0 | 44.3  | 145.6 | 1.6 |
| Chetaslina-Spot 34  | 74  | 13883  | 4.1 | 18.9038 | 3.3 | 0.1667 | 3.5 | 0.0229 | 1.1 | 0.33 | 145.7 | 1.6 | 156.5 | 5.0 | 324.5 | 74.5  | 145.7 | 1.6 |
| Chetaslina-Spot 105 | 261 | 36792  | 3.3 | 20.3015 | 2.9 | 0.1553 | 3.1 | 0.0229 | 1.3 | 0.41 | 145.7 | 1.8 | 146.5 | 4.3 | 160.1 | 66.8  | 145.7 | 1.8 |
| Chetaslina-Spot 74  | 182 | 28588  | 2.5 | 20.3955 | 3.1 | 0.1546 | 3.3 | 0.0229 | 1.1 | 0.33 | 145.8 | 1.6 | 146.0 | 4.5 | 149.3 | 72.5  | 145.8 | 1.6 |
| Chetaslina-Spot 52  | 52  | 3341   | 5.3 | 21.3661 | 5.3 | 0.1477 | 5.6 | 0.0229 | 1.8 | 0.32 | 145.9 | 2.5 | 139.9 | 7.3 | 39.2  | 127.1 | 145.9 | 2.5 |
| Chetaslina-Spot 60  | 77  | 6107   | 4.6 | 20.9403 | 4.4 | 0.1508 | 4.8 | 0.0229 | 1.8 | 0.39 | 146.0 | 2.7 | 142.6 | 6.3 | 87.2  | 104.0 | 146.0 | 2.7 |
| Chetaslina-Spot 78  | 42  | 6311   | 4.9 | 20.3400 | 5.9 | 0.1553 | 6.3 | 0.0229 | 2.0 | 0.32 | 146.0 | 2.9 | 146.6 | 8.6 | 155.7 | 139.0 | 146.0 | 2.9 |
| Chetaslina-Spot 32  | 239 | 26173  | 2.6 | 19.9362 | 2.5 | 0.1584 | 2.8 | 0.0229 | 1.2 | 0.42 | 146.0 | 1.7 | 149.3 | 3.8 | 202.4 | 58.3  | 146.0 | 1.7 |
| Chetaslina-Spot 2   | 132 | 15043  | 4.1 | 20.4317 | 4.4 | 0.1547 | 4.6 | 0.0229 | 1.3 | 0.29 | 146.1 | 1.9 | 146.1 | 6.2 | 145.1 | 102.4 | 146.1 | 1.9 |
| Chetaslina-Spot 63  | 68  | 3701   | 6.4 | 21.8923 | 5.4 | 0.1444 | 5.6 | 0.0229 | 1.6 | 0.29 | 146.1 | 2.3 | 136.9 | 7.2 | 19.3  | 129.7 | 146.1 | 2.3 |
| Chetaslina-Spot 106 | 71  | 10616  | 4.1 | 20.4128 | 4.4 | 0.1549 | 4.6 | 0.0229 | 1.3 | 0.29 | 146.1 | 1.9 | 146.2 | 6.2 | 147.3 | 103.0 | 146.1 | 1.9 |
| Chetaslina-Spot 17  | 201 | 28188  | 7.3 | 20.7152 | 3.6 | 0.1526 | 3.8 | 0.0229 | 1.2 | 0.31 | 146.1 | 1.7 | 144.2 | 5.1 | 112.7 | 84.6  | 146.1 | 1.7 |
| Chetaslina-Spot 43  | 54  | 4943   | 3.1 | 21.2429 | 5.6 | 0.1489 | 5.8 | 0.0229 | 1.5 | 0.25 | 146.2 | 2.1 | 140.9 | 7.7 | 53.0  | 134.9 | 146.2 | 2.1 |
| Chetaslina-Spot 77  | 90  | 11753  | 3.1 | 20.5295 | 3.4 | 0.1541 | 3.6 | 0.0229 | 1.3 | 0.35 | 146.2 | 1.8 | 145.5 | 4.9 | 133.9 | 80.2  | 146.2 | 1.8 |
| Chetaslina-Spot 48  | 115 | 12776  | 3.6 | 20.1628 | 3.6 | 0.1570 | 3.9 | 0.0230 | 1.4 | 0.36 | 146.3 | 2.0 | 148.1 | 5.4 | 176.1 | 85.1  | 146.3 | 2.0 |
| Chetaslina-Spot 4   | 117 | 11420  | 3.8 | 20.7021 | 3.5 | 0.1529 | 3.7 | 0.0230 | 1.5 | 0.39 | 146.4 | 2.1 | 144.5 | 5.0 | 114.2 | 81.5  | 146.4 | 2.1 |
| Chetaslina-Spot 9   | 160 | 14505  | 3.8 | 20.4058 | 3.9 | 0.1553 | 4.1 | 0.0230 | 1.2 | 0.29 | 146.5 | 1.7 | 146.6 | 5.5 | 148.1 | 91.2  | 146.5 | 1.7 |
| Chetaslina-Spot 8   | 143 | 131395 | 3.9 | 19.7239 | 3.5 | 0.1607 | 3.6 | 0.0230 | 1.0 | 0.28 | 146.5 | 1.5 | 151.3 | 5.1 | 227.2 | 80.4  | 146.5 | 1.5 |
| Chetaslina-Spot 6   | 52  | 6986   | 5.2 | 20.2153 | 5.2 | 0.1569 | 5.4 | 0.0230 | 1.6 | 0.29 | 146.6 | 2.3 | 148.0 | 7.5 | 170.0 | 121.2 | 146.6 | 2.3 |
| Chetaslina-Spot 40  | 145 | 25552  | 3.7 | 19.6878 | 3.0 | 0.1611 | 3.4 | 0.0230 | 1.5 | 0.43 | 146.6 | 2.1 | 151.7 | 4.8 | 231.4 | 70.3  | 146.6 | 2.1 |
| Chetaslina-Spot 14  | 99  | 16421  | 5.0 | 19.7903 | 4.1 | 0.1603 | 4.4 | 0.0230 | 1.5 | 0.34 | 146.6 | 2.2 | 151.0 | 6.1 | 219.4 | 95.1  | 146.6 | 2.2 |
| Chetaslina-Spot 86  | 295 | 44157  | 2.5 | 19.6672 | 2.3 | 0.1614 | 2.5 | 0.0230 | 1.1 | 0.43 | 146.7 | 1.6 | 151.9 | 3.5 | 233.9 | 52.3  | 146.7 | 1.6 |
| Chetaslina-Spot 7   | 82  | 54296  | 5.3 | 19.6551 | 5.0 | 0.1616 | 5.2 | 0.0230 | 1.4 | 0.28 | 146.8 | 2.1 | 152.1 | 7.3 | 235.3 | 114.4 | 146.8 | 2.1 |
| Chetaslina-Spot 53  | 291 | 37758  | 4.8 | 20.0197 | 2.6 | 0.1587 | 2.8 | 0.0230 | 1.2 | 0.42 | 146.8 | 1.7 | 149.5 | 3.9 | 192.7 | 59.3  | 146.8 | 1.7 |
| Chetaslina-Spot 29  | 114 | 8059   | 3.6 | 20.1783 | 3.3 | 0.1574 | 3.6 | 0.0230 | 1.5 | 0.42 | 146.9 | 2.2 | 148.5 | 5.0 | 174.3 | 77.2  | 146.9 | 2.2 |
| Chetaslina-Spot 84  | 94  | 7090   | 4.5 | 21.1764 | 3.9 | 0.1501 | 4.1 | 0.0230 | 1.2 | 0.30 | 146.9 | 1.8 | 142.0 | 5.5 | 60.5  | 93.9  | 146.9 | 1.8 |
| Chetaslina-Spot 72  | 152 | 24064  | 2.3 | 20.1623 | 2.9 | 0.1576 | 3.1 | 0.0231 | 1.3 | 0.40 | 146.9 | 1.8 | 148.6 | 4.3 | 176.1 | 67.0  | 146.9 | 1.8 |
| Chetaslina-Spot 89  | 103 | 47265  | 3.9 | 20.2012 | 4.4 | 0.1574 | 4.6 | 0.0231 | 1.2 | 0.27 | 147.0 | 1.8 | 148.4 | 6.3 | 171.7 | 103.0 | 147.0 | 1.8 |
| Chetaslina-Spot 69  | 95  | 26270  | 4.1 | 19.2209 | 4.4 | 0.1654 | 4.6 | 0.0231 | 1.5 | 0.33 | 147.0 | 2.2 | 155.5 | 6.7 | 286.6 | 100.1 | 147.0 | 2.2 |
| Chetaslina-Spot 98  | 290 | 88610  | 2.8 | 18.9782 | 4.7 | 0.1676 | 4.8 | 0.0231 | 1.1 | 0.22 | 147.0 | 1.5 | 157.3 | 7.0 | 315.5 | 106.4 | 147.0 | 1.5 |
| Chetaslina-Spot 5   | 189 | 7560   | 2.7 | 20.7473 | 2.7 | 0.1533 | 2.8 | 0.0231 | 0.9 | 0.33 | 147.0 | 1.4 | 144.8 | 3.8 | 109.0 | 62.7  | 147.0 | 1.4 |
| Chetaslina-Spot 100 | 244 | 26844  | 2.8 | 19.9931 | 2.4 | 0.1591 | 2.6 | 0.0231 | 1.1 | 0.43 | 147.0 | 1.7 | 149.9 | 3.7 | 195.8 | 55.3  | 147.0 | 1.7 |
| Chetaslina-Spot 50  | 53  | 10052  | 6.4 | 20.3475 | 5.2 | 0.1565 | 5.5 | 0.0231 | 1.7 | 0.31 | 147.2 | 2.5 | 147.6 | 7.5 | 154.8 | 121.9 | 147.2 | 2.5 |
| Chetaslina-Spot 20  | 69  | 9266   | 3.7 | 19.7803 | 3.0 | 0.1610 | 3.4 | 0.0231 | 1.5 | 0.44 | 147.2 | 2.1 | 151.6 | 4.8 | 220.6 | 70.5  | 147.2 | 2.1 |
| Chetaslina-Spot 66  | 119 | 12477  | 3.9 | 20.6116 | 3.6 | 0.1546 | 3.9 | 0.0231 | 1.3 | 0.34 | 147.2 | 1.9 | 145.9 | 5.3 | 124.5 | 85.7  | 147.2 | 1.9 |
| Chetaslina-Spot 107 | 54  | 4922   | 5.9 | 20.7192 | 5.3 | 0.1538 | 5.5 | 0.0231 | 1.4 | 0.26 | 147.3 | 2.1 | 145.2 | 7.4 | 112.3 | 124.2 | 147.3 | 2.1 |
| Chetaslina-Spot 54  | 83  | 18613  | 4.2 | 21.1803 | 4.3 | 0.1505 | 4.6 | 0.0231 | 1.7 | 0.37 | 147.3 | 2.5 | 142.3 | 6.1 | 60.0  | 101.5 | 147.3 | 2.5 |
| Chetaslina-Spot 59  | 214 | 20530  | 2.9 | 20.0838 | 2.7 | 0.1588 | 3.1 | 0.0231 | 1.5 | 0.48 | 147.4 | 2.2 | 149.6 | 4.3 | 185.2 | 62.6  | 147.4 | 2.2 |
| Chetaslina-Spot 55  | 205 | 19455  | 4.2 | 20.2502 | 3.0 | 0.1575 | 3.2 | 0.0231 | 1.2 | 0.36 | 147.4 | 1.7 | 148.5 | 4.5 | 166.0 | 70.5  | 147.4 | 1.7 |
| Chetaslina-Spot 16  | 393 | 43469  | 2.7 | 19.8612 | 2.0 | 0.1606 | 2.3 | 0.0231 | 1.1 | 0.49 | 147.4 | 1.6 | 151.2 | 3.2 | 211.2 | 46.7  | 147.4 | 1.6 |
| Chetaslina-Spot 47  | 187 | 19429  | 3.7 | 20.0082 | 3.3 | 0.1594 | 3.6 | 0.0231 | 1.5 | 0.41 | 147.4 | 2.2 | 150.2 | 5.0 | 194.1 | 76.0  | 147.4 | 2.2 |
| Chetaslina-Spot 27  | 109 | 18558  | 8.0 | 20.3711 | 4.2 | 0.1567 | 4.5 | 0.0231 | 1.5 | 0.33 | 147.5 | 2.2 | 147.8 | 6.2 | 152.1 | 99.0  | 147.5 | 2.2 |
| Chetaslina-Spot 83  | 117 | 32830  | 2.1 | 20.8355 | 4.0 | 0.1532 | 4.2 | 0.0232 | 1.3 | 0.30 | 147.6 | 1.8 | 144.8 | 5.7 | 99.0  | 95.0  | 147.6 | 1.8 |
| Chetaslina-Spot 71  | 111 | 9849   | 4.2 | 20.7614 | 3.6 | 0.1538 | 4.0 | 0.0232 | 1.7 | 0.43 | 147.6 | 2.5 | 145.3 | 5.4 | 107.5 | 84.3  | 147.6 | 2.5 |
| Chetaslina-Spot 15  | 211 | 26166  | 2.8 | 20.2113 | 2.7 | 0.1582 | 2.9 | 0.0232 | 0.9 | 0.32 | 147.8 | 1.4 | 149.2 | 4.0 | 170.5 | 64.1  | 147.8 | 1.4 |
| Chetaslina-Spot 35  | 54  | 7867   | 5.3 | 20.7642 | 5.6 | 0.1540 | 5.8 | 0.0232 | 1.6 | 0.28 | 147.8 | 2.4 | 145.5 | 7.8 | 107.1 | 131.2 | 147.8 | 2.4 |
| Chetaslina-Spot 109 | 114 | 31213  | 2.9 | 19.2168 | 2.9 | 0.1665 | 3.3 | 0.0232 | 1.5 | 0.47 | 147.9 | 2.2 | 156.4 | 4.7 | 287.1 | 65.5  | 147.9 | 2.2 |
| Chetaslina-Spot 82  | 127 | 6402   | 2.2 | 20.2513 | 3.9 | 0.1580 | 4.3 | 0.0232 | 1.7 | 0.41 | 147.9 | 2.5 | 148.9 | 5.9 | 165.9 | 91.0  | 147.9 | 2.5 |
| Chetaslina-Spot 42  | 118 | 39391  | 2.3 | 21.1873 | 3.3 | 0.1511 | 3.6 | 0.0232 | 1.3 | 0.37 | 147.9 | 1.9 | 142.8 | 4.7 | 59.3  | 78.8  | 147.9 | 1.9 |
| Chetaslina-Spot 79  | 152 | 9497   | 3.3 | 21.2019 | 3.2 | 0.1510 | 3.6 | 0.0232 | 1.7 | 0.46 | 147.9 | 2.4 | 142.8 | 4.8 | 57.6  | 76.4  | 147.9 | 2.4 |
| Chetaslina-Spot 58  | 111 | 15334  | 2.4 | 19.6992 | 2.9 | 0.1626 | 3.5 | 0.0232 | 1.9 | 0.54 | 148.1 | 2.8 | 153.0 | 4.9 | 230.1 | 67.7  | 148.1 | 2.8 |
| Chetaslina-Spot 25  | 103 | 6051   | 3.2 | 21.4099 | 4.0 | 0.1497 | 4.2 | 0.0232 | 1.3 | 0.32 | 148.1 | 2.0 | 141.6 | 5.5 | 34.3  | 95.2  | 148.1 | 2.0 |
| Chetaslina-Spot 101 | 92  | 20343  | 3.9 | 19.8765 | 4.2 | 0.1613 | 4.4 | 0.0233 | 1.5 | 0.33 | 148.2 | 2.2 | 151.8 | 6.3 | 209.4 | 97.1  | 148.2 | 2.2 |
| Chetaslina-Spot 13  | 91  | 12217  | 5.1 | 20.1724 | 3.8 | 0.1593 | 4.1 | 0.0233 | 1.4 | 0.35 | 148.5 | 2.1 | 150.1 | 5.7 | 175.0 | 89.3  | 148.5 | 2.1 |
| Chetaslina-Spot 36  | 62  | 8607   | 4.5 | 19.5737 | 5.9 | 0.1644 | 6.1 | 0.0233 | 1.7 | 0.28 | 148.7 | 2.5 | 154.5 | 8.8 | 244.8 | 135.0 | 148.7 | 2.5 |
| Chetaslina-Spot 80  | 89  | 5328   | 4.0 | 20.6352 | 5.2 | 0.1560 | 5.5 | 0.0233 | 1.7 | 0.31 | 148.7 | 2.5 | 147.2 | 7.5 | 121.8 | 122.3 | 148.7 | 2.5 |
| Chetaslina-Spot 3   | 136 | 43211  | 3.2 | 20.1410 | 3.9 | 0.1599 | 4.1 | 0.0234 | 1.0 | 0.26 | 148.8 | 1.5 | 150.6 | 5.7 | 178.6 | 91.9  | 148.8 | 1.5 |
| Chetaslina-Spot 11  | 52  | 35082  | 3.8 | 19.6915 | 4.7 | 0.1636 | 5.1 | 0.0234 | 1.9 | 0.37 | 148.9 | 2.8 | 153.8 | 7.2 | 231.0 | 108.7 | 148.9 | 2.8 |
| Chetaslina-Spot 94  | 72  | 10466  | 3.0 | 21.3576 | 4.6 | 0.1508 | 4.9 | 0.0234 | 1.5 | 0.31 | 148.9 | 2.3 | 142.6 | 6.5 | 40.2  | 110.8 | 148.9 | 2.3 |
| Chetaslina-Spot 39  | 218 | 49671  | 4.5 | 19.5975 | 2.6 | 0.1647 | 2.8 | 0.0234 | 1.0 | 0.37 | 149.2 | 1.5 | 154.8 | 4.0 | 242.0 | 59.8  | 149.2 | 1.5 |
| Chetaslina-Spot 51  | 62  | 24619  | 5.5 | 20.7985 | 5.0 | 0.1552 | 5.2 | 0.0234 | 1.5 | 0.30 | 149.2 | 2.3 | 146.5 | 7.1 | 103.2 | 117.5 | 149.2 | 2.3 |
| Chetaslina-Spot 64  | 157 | 31775  | 6.9 | 19.9349 | 2.9 | 0.1622 | 3.1 | 0.0234 | 0.9 | 0.31 | 149.4 | 1.4 | 152.6 | 4.3 | 202.6 | 67.8  | 149.4 | 1.4 |
| Chetaslina-Spot 70  | 92  | 11434  | 4.3 | 20.1881 | 3.9 | 0.1602 | 4.1 | 0.0235 | 1.2 | 0.28 | 149.4 | 1.7 | 150.9 | 5.7 | 173.2 | 90.7  | 149.4 | 1.7 |
| Chetaslina-Spot 57  | 94  | 10739  | 3.4 | 21.5249 | 3.0 | 0.1504 | 3.4 | 0.0235 | 1.5 | 0.44 | 149.6 | 2.2 | 142.3 | 4.5 | 21.4  | 72.6  | 149.6 | 2.2 |
| Chetaslina-Spot 76  | 133 | 16660  | 3.7 | 20.5932 | 3.0 | 0.1573 | 3.4 | 0.0235 | 1.7 | 0.49 | 149.7 | 2.5 | 148.4 | 4.7 | 126.7 | 70.1  | 149.7 | 2.5 |
| Chetaslina-Spot 37  | 258 | 30107  | 3.5 | 20.7108 | 2.4 | 0.15   |     |        |     |      |       |     |       |     |       |       |       |     |

|             |      |       |       |         |        |         |        |        |      |      |       |      |         |        |         |        |       |      |
|-------------|------|-------|-------|---------|--------|---------|--------|--------|------|------|-------|------|---------|--------|---------|--------|-------|------|
| Chisana-94  | 239  | 568   | 2.2   | 2.1201  | 434.4  | 0.0578  | 439.0  | 0.0009 | 63.3 | 0.14 | 5.7   | 3.6  | 57.0    | 248.2  | 4155.1  | 694.1  | 5.7   | 3.6  |
| Chisana-39  | 223  | 951   | 2.2   | 2.4471  | 218.7  | 0.0536  | 221.5  | 0.0010 | 35.3 | 0.16 | 6.1   | 2.2  | 53.0    | 114.9  | 3941.2  | 1036.9 | 6.1   | 2.2  |
| Chisana-75  | 168  | 342   | 2.2   | 2.1267  | 285.9  | 0.0636  | 289.6  | 0.0010 | 46.1 | 0.16 | 6.3   | 2.9  | 62.6    | 177.5  | 4150.4  | 991.7  | 6.3   | 2.9  |
| Chisana-55  | 181  | 292   | 1.5   | -0.1097 | 4437.5 | -1.2456 | 4438.0 | 0.0010 | 64.7 | 0.01 | 6.4   | 4.1  | NA      | NA     | NA      | NA     | 6.4   | 4.1  |
| Chisana-15  | 152  | 467   | 2.1   | 2.8209  | 146.9  | 0.0489  | 159.0  | 0.0010 | 60.8 | 0.38 | 6.4   | 3.9  | 48.5    | 75.4   | 3726.5  | 1135.4 | 6.4   | 3.9  |
| Chisana-103 | 206  | 897   | 2.2   | -1.0349 | 721.7  | -0.1347 | 724.0  | 0.0010 | 56.9 | 0.08 | 6.5   | 3.7  | -146.9  | NA     | NA      | NA     | 6.5   | 3.7  |
| Chisana-99  | 231  | 477   | 2.1   | -0.6184 | 1085.6 | -0.2259 | 1086.5 | 0.0010 | 45.9 | 0.04 | 6.5   | 3.0  | -260.0  | NA     | NA      | NA     | 6.5   | 3.0  |
| Chisana-83  | 156  | 436   | 2.4   | -1.0611 | 268.1  | -0.1339 | 272.4  | 0.0010 | 48.5 | 0.18 | 6.6   | 3.2  | -146.0  | -456.0 | NA      | NA     | 6.6   | 3.2  |
| Chisana-80  | 239  | 472   | 2.8   | -0.9249 | 637.5  | -0.1544 | 638.9  | 0.0010 | 42.1 | 0.07 | 6.7   | 2.8  | -170.3  | NA     | NA      | NA     | 6.7   | 2.8  |
| Chisana-06  | 128  | 385   | 3.1   | -1.3534 | 206.2  | -0.1058 | 219.7  | 0.0010 | 75.7 | 0.34 | 6.7   | 5.1  | -113.5  | -270.0 | NA      | NA     | 6.7   | 5.1  |
| Chisana-77  | 826  | 1902  | 0.6   | 23.3378 | 74.6   | 0.0062  | 75.3   | 0.0011 | 9.8  | 0.13 | 6.8   | 0.7  | 6.3     | 4.7    | -176.4  | 2185.4 | 6.8   | 0.7  |
| Chisana-37  | 372  | 494   | 1.2   | 7.4431  | 132.8  | 0.0197  | 143.9  | 0.0011 | 55.3 | 0.38 | 6.8   | 3.8  | 19.8    | 28.2   | 2155.6  | 259.2  | 6.8   | 3.8  |
| Chisana-20  | 183  | 399   | 1.3   | -0.2255 | 1604.4 | -0.6500 | 1605.8 | 0.0011 | 65.0 | 0.04 | 6.9   | 4.4  | -1066.1 | NA     | NA      | NA     | 6.9   | 4.4  |
| Chisana-12  | 201  | 460   | 2.6   | -1.6033 | 493.5  | -0.0916 | 495.1  | 0.0011 | 39.7 | 0.08 | 6.9   | 2.7  | -97.6   | -556.9 | NA      | NA     | 6.9   | 2.7  |
| Chisana-26  | 148  | 345   | 0.6   | -0.1074 | 3788.5 | -1.3741 | 3788.7 | 0.0011 | 40.1 | 0.01 | 6.9   | 2.8  | NA      | NA     | NA      | NA     | 6.9   | 2.8  |
| Chisana-07  | 163  | 343   | 2.6   | -0.9408 | 548.5  | -0.1595 | 550.4  | 0.0011 | 45.9 | 0.08 | 7.0   | 3.2  | -176.4  | NA     | NA      | NA     | 7.0   | 3.2  |
| Chisana-07  | 127  | 566   | 1.4   | 1.3141  | 200.1  | 0.1149  | 205.9  | 0.0011 | 48.5 | 0.24 | 7.1   | 3.4  | 110.5   | 218.9  | NA      | NA     | 7.1   | 3.4  |
| Chisana-59  | 208  | 498   | 1.9   | 3.4441  | 145.2  | 0.0441  | 157.9  | 0.0011 | 62.1 | 0.39 | 7.1   | 4.4  | 43.8    | 67.8   | 3419.5  | 966.1  | 7.1   | 4.4  |
| Chisana-16  | 1226 | 1773  | 0.6   | 25.8714 | 31.2   | 0.0059  | 32.5   | 0.0011 | 9.0  | 0.28 | 7.1   | 0.6  | 6.0     | 1.9    | -440.2  | 837.2  | 7.1   | 0.6  |
| Chisana-38  | 239  | 788   | 2.5   | 0.5728  | 1169.0 | 0.2691  | 1169.7 | 0.0011 | 41.4 | 0.04 | 7.2   | 3.0  | 242.0   | NA     | NA      | NA     | 7.2   | 3.0  |
| Chisana-69  | 176  | 515   | 1.8   | 4.8307  | 198.2  | 0.0320  | 201.7  | 0.0011 | 37.5 | 0.19 | 7.2   | 2.7  | 32.0    | 63.6   | 2882.3  | 455.7  | 7.2   | 2.7  |
| Chisana-89  | 135  | 331   | 2.5   | 4.0644  | 150.8  | 0.0385  | 156.6  | 0.0011 | 42.4 | 0.27 | 7.3   | 3.1  | 38.4    | 59.0   | 3159.5  | 794.3  | 7.3   | 3.1  |
| Chisana-70  | 214  | 498   | 2.5   | 3.4000  | 326.5  | 0.0469  | 329.4  | 0.0012 | 43.7 | 0.13 | 7.4   | 3.3  | 46.5    | 150.9  | 3439.5  | 448.7  | 7.4   | 3.3  |
| Chisana-58  | 179  | 341   | 2.1   | -1.2238 | 876.5  | -0.1315 | 877.6  | 0.0012 | 42.3 | 0.05 | 7.5   | 3.2  | -143.2  | NA     | NA      | NA     | 7.5   | 3.2  |
| Chisana-22  | 190  | 686   | 2.1   | -3.8541 | 147.7  | -0.0419 | 154.2  | 0.0012 | 44.2 | 0.29 | 7.6   | 3.3  | -43.5   | -68.6  | NA      | NA     | 7.6   | 3.3  |
| Chisana-79  | 137  | 463   | 2.0   | 1.0910  | 495.2  | 0.1521  | 497.0  | 0.0012 | 42.7 | 0.09 | 7.8   | 3.3  | 143.8   | 798.4  | NA      | NA     | 7.8   | 3.3  |
| Chisana-18  | 271  | 823   | 2.7   | 0.4017  | 4010.7 | 0.4221  | 4010.8 | 0.0012 | 29.0 | 0.01 | 7.9   | 2.3  | 357.6   | NA     | NA      | NA     | 7.9   | 2.3  |
| Chisana-68  | 172  | 529   | 2.1   | 8.1620  | 102.8  | 0.0211  | 107.5  | 0.0012 | 31.2 | 0.29 | 8.0   | 2.5  | 21.2    | 22.5   | 1993.2  | 309.1  | 8.0   | 2.5  |
| Chisana-67  | 213  | 512   | 1.9   | -1.2843 | 555.2  | -0.1347 | 556.9  | 0.0013 | 44.0 | 0.08 | 8.1   | 3.6  | -146.9  | #####  | NA      | NA     | 8.1   | 3.6  |
| Chisana-63  | 214  | 552   | 1.8   | 4.4582  | 147.1  | 0.0422  | 152.8  | 0.0014 | 41.4 | 0.27 | 8.8   | 3.6  | 42.0    | 62.9   | 3011.8  | 720.9  | 8.8   | 3.6  |
| Chisana-97  | 244  | 681   | 2.0   | 11.7144 | 137.9  | 0.0165  | 140.5  | 0.0014 | 26.9 | 0.19 | 9.1   | 2.4  | 16.7    | 23.2   | 1323.8  | 320.0  | 9.1   | 2.4  |
| Chisana-03  | 384  | 1046  | 2.3   | 6.4760  | 201.8  | 0.0308  | 204.2  | 0.0014 | 31.2 | 0.15 | 9.3   | 2.9  | 30.8    | 61.9   | 2395.4  | 124.1  | 9.3   | 2.9  |
| Chisana-33  | 207  | 544   | 2.1   | 43.2451 | 87.6   | 0.0091  | 89.2   | 0.0028 | 16.5 | 0.18 | 18.3  | 3.0  | 9.2     | 8.1    | -2044.3 | 1358.9 | 18.3  | 3.0  |
| Chisana-30  | 327  | 3591  | 2.4   | 22.2436 | 53.6   | 0.0198  | 55.4   | 0.0032 | 13.8 | 0.25 | 20.5  | 2.8  | 19.9    | 10.9   | -58.0   | 1400.9 | 20.5  | 2.8  |
| Chisana-82  | 240  | 3384  | 2.0   | 20.6427 | 87.2   | 0.0259  | 88.8   | 0.0039 | 16.8 | 0.19 | 24.9  | 4.2  | 25.9    | 22.7   | 120.9   | 2734.5 | 24.9  | 4.2  |
| Chisana-05  | 383  | 12167 | 1.1   | 29.0022 | 37.1   | 0.0190  | 37.8   | 0.0040 | 7.1  | 0.19 | 25.7  | 1.8  | 19.1    | 7.2    | -750.4  | 1072.8 | 25.7  | 1.8  |
| Chisana-91  | 69   | 2497  | 2.8   | 23.6744 | 32.6   | 0.0987  | 34.0   | 0.0170 | 9.5  | 0.28 | 108.4 | 10.2 | 95.6    | 31.0   | -212.2  | 837.7  | 108.4 | 10.2 |
| Chisana-51  | 43   | 2035  | 2.7   | 22.0923 | 73.5   | 0.1085  | 74.5   | 0.0174 | 12.2 | 0.16 | 111.1 | 13.4 | 104.6   | 74.1   | -41.4   | 2087.1 | 111.1 | 13.4 |
| Chisana-88  | 104  | 5496  | 2.2   | 17.1538 | 33.8   | 0.1439  | 34.5   | 0.0179 | 6.7  | 0.20 | 114.4 | 7.6  | 136.5   | 44.0   | 540.9   | 759.3  | 114.4 | 7.6  |
| Chisana-04  | 94   | 4041  | 2.1   | 21.7860 | 37.7   | 0.1136  | 38.4   | 0.0180 | 7.5  | 0.19 | 114.7 | 8.5  | 109.3   | 39.8   | -7.6    | 939.6  | 114.7 | 8.5  |
| Chisana-49  | 96   | 4020  | 3.0   | 21.4881 | 73.6   | 0.1155  | 73.8   | 0.0180 | 5.8  | 0.08 | 115.0 | 6.6  | 110.9   | 77.8   | 25.6    | 2069.3 | 115.0 | 6.6  |
| Chisana-44  | 177  | 5606  | 2.5   | 23.4806 | 14.4   | 0.1059  | 14.6   | 0.0180 | 2.4  | 0.17 | 115.3 | 2.8  | 102.2   | 14.2   | -191.6  | 362.7  | 115.3 | 2.8  |
| Chisana-47  | 221  | 11650 | 2.3   | 20.6843 | 14.4   | 0.1203  | 14.6   | 0.0180 | 2.2  | 0.15 | 115.3 | 2.5  | 115.3   | 15.9   | 116.2   | 342.1  | 115.3 | 2.5  |
| Chisana-14  | 61   | 2405  | 2.8   | 25.7199 | 42.8   | 0.0969  | 43.6   | 0.0181 | 8.7  | 0.20 | 115.5 | 9.9  | 93.9    | 39.2   | -424.8  | 1166.6 | 115.5 | 9.9  |
| Chisana-11  | 82   | 2786  | 2.0   | 20.9497 | 40.9   | 0.1191  | 41.6   | 0.0181 | 7.8  | 0.19 | 115.6 | 9.0  | 114.2   | 45.0   | 86.1    | 1007.0 | 115.6 | 9.0  |
| Chisana-17  | 132  | 8889  | 3.2   | 22.9357 | 27.6   | 0.1088  | 28.5   | 0.0181 | 7.0  | 0.25 | 115.7 | 8.1  | 104.9   | 28.4   | -133.2  | 693.3  | 115.7 | 8.1  |
| Chisana-01  | 77   | 2804  | 2.7   | 13.6864 | 34.1   | 0.1827  | 35.9   | 0.0181 | 11.3 | 0.31 | 115.8 | 12.9 | 170.3   | 56.4   | 1015.7  | 711.9  | 115.8 | 12.9 |
| Chisana-41  | 233  | 9666  | 1.9   | 21.2767 | 13.7   | 0.1178  | 13.8   | 0.0182 | 1.8  | 0.13 | 116.2 | 2.1  | 113.1   | 14.8   | 49.2    | 328.2  | 116.2 | 2.1  |
| Chisana-87  | 253  | 22480 | 2.1   | 19.9012 | 14.7   | 0.1266  | 15.3   | 0.0183 | 4.3  | 0.28 | 116.8 | 5.0  | 121.1   | 17.5   | 206.5   | 341.8  | 116.8 | 5.0  |
| Chisana-78  | 238  | 11173 | 2.2   | 20.3976 | 9.9    | 0.1236  | 10.2   | 0.0183 | 2.6  | 0.26 | 116.8 | 3.0  | 118.3   | 11.4   | 149.1   | 231.6  | 116.8 | 3.0  |
| Chisana-72  | 138  | 5993  | 2.2   | 25.3818 | 26.8   | 0.0996  | 27.1   | 0.0183 | 4.2  | 0.15 | 117.1 | 4.8  | 96.4    | 25.0   | -390.2  | 708.6  | 117.1 | 4.8  |
| Chisana-46  | 241  | 11013 | 3.4   | 20.3649 | 11.4   | 0.1242  | 12.0   | 0.0184 | 3.5  | 0.29 | 117.2 | 4.1  | 118.9   | 13.4   | 152.8   | 268.6  | 117.2 | 4.1  |
| Chisana-29  | 146  | 3954  | 2.1   | 26.2396 | 22.6   | 0.0967  | 23.0   | 0.0184 | 4.5  | 0.19 | 117.6 | 5.2  | 93.8    | 20.6   | -477.5  | 604.6  | 117.6 | 5.2  |
| Chisana-09  | 189  | 11163 | 1.8   | 23.4573 | 16.7   | 0.1083  | 16.9   | 0.0184 | 2.7  | 0.16 | 117.7 | 3.2  | 104.4   | 16.8   | -189.1  | 420.2  | 117.7 | 3.2  |
| Chisana-45  | 375  | 12583 | 2.8   | 21.4687 | 8.4    | 0.1185  | 8.6    | 0.0185 | 1.8  | 0.21 | 117.9 | 2.1  | 113.7   | 9.3    | 27.7    | 202.5  | 117.9 | 2.1  |
| Chisana-56  | 143  | 13662 | 2.2   | 17.4377 | 17.7   | 0.1461  | 18.0   | 0.0185 | 2.9  | 0.16 | 118.0 | 3.4  | 138.5   | 23.3   | 504.9   | 392.9  | 118.0 | 3.4  |
| Chisana-98  | 116  | 4485  | 2.1   | 22.3849 | 21.2   | 0.1138  | 21.6   | 0.0185 | 4.4  | 0.20 | 118.0 | 5.2  | 109.4   | 22.4   | -73.4   | 522.3  | 118.0 | 5.2  |
| Chisana-105 | 91   | 9398  | 2.9   | 31.0822 | 41.9   | 0.0820  | 42.3   | 0.0185 | 5.4  | 0.13 | 118.1 | 6.3  | 80.0    | 32.5   | -949.1  | 1274.6 | 118.1 | 6.3  |
| Chisana-61  | 58   | 3428  | 2.6   | 14.3848 | 28.9   | 0.1774  | 29.5   | 0.0185 | 6.2  | 0.21 | 118.2 | 7.2  | 165.9   | 45.2   | 914.2   | 605.9  | 118.2 | 7.2  |
| Chisana-57  | 53   | 5522  | 2.5   | 22.5862 | 141.5  | 0.1132  | 142.0  | 0.0186 | 11.7 | 0.08 | 118.5 | 13.8 | 108.9   | 147.7  | -95.4   | 1518.9 | 118.5 | 13.8 |
| Chisana-96  | 90   | 2918  | 2.2   | 19.4980 | 26.5   | 0.1314  | 26.8   | 0.0186 | 3.9  | 0.15 | 118.7 | 4.6  | 125.3   | 31.6   | 253.8   | 618.8  | 118.7 | 4.6  |
| Chisana-50  | 104  | 4963  | 2.2   | 19.4411 | 28.3   | 0.1317  | 28.7   | 0.0186 | 4.5  | 0.16 | 118.7 | 5.3  | 125.7   | 33.9   | 260.5   | 662.3  | 118.7 | 5.3  |
| Chisana-73  | 76   | 9147  | 1.8   | 18.8866 | 76.3   | 0.1356  | 76.8   | 0.0186 | 9.0  | 0.12 | 118.7 | 10.6 | 129.1   | 93.4   | 326.5   | 2078.5 | 118.7 | 10.6 |
| Chisana-32  | 87   | 2253  | 2.1   | 18.1468 | 51.1   | 0.1422  | 51.8   | 0.0187 | 8.7  | 0.17 | 119.5 | 10.3 | 135.0   | 65.6   | 416.5   | 1218.7 | 119.5 | 10.3 |
| Chisana-28  | 80   | 3799  | 2.1   | 26.7051 | 41.0   | 0.0967  | 41.3   | 0.0187 | 4.7  | 0.11 | 119.6 | 5.5  | 93.7    | 36.9   | -524.3  | 1136.8 | 119.6 | 5.5  |
| Chisana-90  | 123  | 7417  | 2.6   | 20.1909 | 27.7   | 0.1280  | 28.2   | 0.0187 | 4.9  | 0.17 | 119.7 | 5.8  | 122.3   | 32.5   | 172.8   | 658.4  | 119.7 | 5.8  |
| Chisana-53  | 106  | 4397  | 2.9   | 18.2908 | 21.2   | 0.1416  | 21.6   | 0.0188 | 4.5  | 0.21 | 120.0 | 5.3  | 134.5   | 27.2   | 398.8   | 478.8  | 120.0 | 5.3  |
| Chisana-02  | 101  | 4851  | 2.7   | 21.1077 | 35.1   | 0.1228  | 35.2   | 0.0188 | 3.3  | 0.09 | 120.1 | 3.9  | 117.6   | 39.2   | 68.2    | 858.2  | 120.1 | 3.9  |
| Chisana-81  | 110  | 5058  | 1.7</ |         |        |         |        |        |      |      |       |      |         |        |         |        |       |      |

|                    |      |        |     |          |       |        |       |        |      |      |       |     |       |      |       |       |       |     |
|--------------------|------|--------|-----|----------|-------|--------|-------|--------|------|------|-------|-----|-------|------|-------|-------|-------|-----|
| Chisana-10         | 218  | 8761   | 3.7 | 21.8557  | 5.6   | 0.1462 | 6.0   | 0.0232 | 2.1  | 0.36 | 147.7 | 3.1 | 138.5 | 7.7  | -15.3 | 134.9 | 147.7 | 3.1 |
| Chisana-40         | 1745 | 93610  | 4.0 | 20.2317  | 1.4   | 0.1599 | 1.6   | 0.0235 | 0.7  | 0.46 | 149.5 | 1.1 | 150.6 | 2.2  | 168.1 | 33.1  | 149.5 | 1.1 |
| Chisana-102        | 872  | 110857 | 7.3 | 19.3132  | 2.6   | 0.2498 | 2.9   | 0.0350 | 1.4  | 0.47 | 221.7 | 3.0 | 226.4 | 5.9  | 275.6 | 58.4  | 221.7 | 3.0 |
| Chisana-13         | 383  | 38929  | 4.3 | 19.0694  | 2.7   | 0.3500 | 2.8   | 0.0484 | 0.8  | 0.30 | 304.7 | 2.5 | 304.7 | 7.4  | 304.6 | 61.4  | 304.7 | 2.5 |
| Chisana-85         | 1566 | 170098 | 6.3 | 18.9847  | 0.8   | 0.3725 | 1.9   | 0.0513 | 1.7  | 0.91 | 322.4 | 5.4 | 321.5 | 5.2  | 314.8 | 17.5  | 322.4 | 5.4 |
| Chitstone River    |      |        |     |          |       |        |       |        |      |      |       |     |       |      |       |       |       |     |
| Chitstone-Spot 210 | 76   | 100    | 1.4 | 152.0873 | 809.9 | 0.0009 | 809.9 | 0.0010 | 9.3  | 0.01 | 6.6   | 0.6 | 0.9   | 7.6  | NA    | NA    | 6.6   | 0.6 |
| Chitstone-Spot 16  | 137  | 100    | 1.1 | 6.6076   | 44.0  | 0.0220 | 44.4  | 0.0011 | 5.9  | 0.13 | 6.8   | 0.4 | 22.1  | 9.7  | NA    | NA    | 6.8   | 0.4 |
| Chitstone-Spot 30  | 81   | 100    | 1.3 | 193.8587 | 19.4  | 0.0008 | 23.7  | 0.0011 | 13.5 | 0.57 | 6.9   | 0.9 | 0.8   | 0.2  | NA    | NA    | 6.9   | 0.9 |
| Chitstone-Spot 74  | 44   | 100    | 1.7 | 2.3750   | 50.4  | 0.0619 | 51.5  | 0.0011 | 10.7 | 0.21 | 6.9   | 0.7 | 61.0  | 30.5 | NA    | NA    | 6.9   | 0.7 |
| Chitstone-Spot 213 | 98   | 100    | 1.4 | 6.6335   | 36.2  | 0.0224 | 36.9  | 0.0011 | 7.0  | 0.19 | 7.0   | 0.5 | 22.5  | 8.2  | NA    | NA    | 7.0   | 0.5 |
| Chitstone-Spot 99  | 113  | 100    | 1.4 | 6.5875   | 67.5  | 0.0232 | 67.8  | 0.0011 | 5.5  | 0.08 | 7.1   | 0.4 | 23.3  | 15.6 | NA    | NA    | 7.1   | 0.4 |
| Chitstone-Spot 43  | 85   | 100    | 1.2 | 6.6305   | 67.6  | 0.0231 | 67.9  | 0.0011 | 6.6  | 0.10 | 7.2   | 0.5 | 23.2  | 15.6 | NA    | NA    | 7.2   | 0.5 |
| Chitstone-Spot 38  | 78   | 100    | 1.3 | 2.3817   | 51.0  | 0.0651 | 51.7  | 0.0011 | 8.3  | 0.16 | 7.2   | 0.6 | 64.0  | 32.1 | NA    | NA    | 7.2   | 0.6 |
| Chitstone-Spot 100 | 70   | 433    | 2.0 | 339.2034 | 34.8  | 0.0005 | 35.4  | 0.0011 | 6.2  | 0.18 | 7.3   | 0.5 | 0.5   | 0.2  | NA    | NA    | 7.3   | 0.5 |
| Chitstone-Spot 265 | 120  | 486    | 1.3 | 866.2673 | 8.3   | 0.0002 | 10.9  | 0.0012 | 7.1  | 0.65 | 7.5   | 0.5 | 0.2   | 0.0  | NA    | NA    | 7.5   | 0.5 |
| Chitstone-Spot 46  | 235  | 995    | 1.2 | 37.4008  | 7.2   | 0.0043 | 9.0   | 0.0012 | 5.5  | 0.60 | 7.6   | 0.4 | 4.4   | 0.4  | NA    | NA    | 7.6   | 0.4 |
| Chitstone-Spot 103 | 69   | 100    | 1.7 | 6.5873   | 67.5  | 0.0247 | 67.8  | 0.0012 | 6.5  | 0.10 | 7.6   | 0.5 | 24.8  | 16.6 | NA    | NA    | 7.6   | 0.5 |
| Chitstone-Spot 125 | 100  | 441    | 1.4 | 60.3875  | 107.6 | 0.0027 | 108.0 | 0.0012 | 8.7  | 0.08 | 7.6   | 0.7 | 2.7   | 3.0  | NA    | NA    | 7.6   | 0.7 |
| Chitstone-Spot 144 | 619  | 3841   | 0.5 | 23.5449  | 7.1   | 0.0070 | 8.2   | 0.0012 | 4.0  | 0.49 | 7.7   | 0.3 | 7.0   | 0.6  | NA    | NA    | 7.7   | 0.3 |
| Chitstone-Spot 128 | 213  | 670    | 1.1 | 24.4290  | 9.8   | 0.0067 | 10.7  | 0.0012 | 4.3  | 0.40 | 7.7   | 0.3 | 6.8   | 0.7  | NA    | NA    | 7.7   | 0.3 |
| Chitstone-Spot 24  | 200  | 821    | 1.6 | 40.0579  | 30.5  | 0.0041 | 31.0  | 0.0012 | 5.5  | 0.18 | 7.7   | 0.4 | 4.2   | 1.3  | NA    | NA    | 7.7   | 0.4 |
| Chitstone-Spot 243 | 180  | 1099   | 1.2 | 51.7948  | 28.1  | 0.0032 | 28.5  | 0.0012 | 5.0  | 0.18 | 7.7   | 0.4 | 3.2   | 0.9  | NA    | NA    | 7.7   | 0.4 |
| Chitstone-Spot 135 | 255  | 1829   | 1.4 | 21.7051  | 7.9   | 0.0076 | 9.5   | 0.0012 | 5.3  | 0.56 | 7.7   | 0.4 | 7.7   | 0.7  | 1.4   | 190.6 | 7.7   | 0.4 |
| Chitstone-Spot 8   | 597  | 1644   | 1.1 | 23.4913  | 7.7   | 0.0071 | 8.6   | 0.0012 | 3.9  | 0.46 | 7.8   | 0.3 | 7.2   | 0.6  | NA    | NA    | 7.8   | 0.3 |
| Chitstone-Spot 171 | 156  | 405    | 1.0 | 53.1507  | 82.8  | 0.0031 | 83.1  | 0.0012 | 6.7  | 0.08 | 7.8   | 0.5 | 3.2   | 2.6  | NA    | NA    | 7.8   | 0.5 |
| Chitstone-Spot 157 | 120  | 537    | 1.8 | 24.7525  | 14.2  | 0.0067 | 15.9  | 0.0012 | 7.1  | 0.45 | 7.8   | 0.6 | 6.8   | 1.1  | NA    | NA    | 7.8   | 0.6 |
| Chitstone-Spot 21  | 207  | 573    | 1.0 | 22.6897  | 25.2  | 0.0074 | 25.6  | 0.0012 | 4.4  | 0.17 | 7.8   | 0.3 | 7.5   | 1.9  | NA    | NA    | 7.8   | 0.3 |
| Chitstone-Spot 66  | 278  | 618    | 2.3 | 25.4402  | 9.5   | 0.0066 | 11.1  | 0.0012 | 5.8  | 0.52 | 7.9   | 0.5 | 6.7   | 0.7  | NA    | NA    | 7.9   | 0.5 |
| Chitstone-Spot 26  | 121  | 541    | 2.2 | 44.2817  | 21.6  | 0.0038 | 22.4  | 0.0012 | 5.8  | 0.26 | 7.9   | 0.5 | 3.9   | 0.9  | NA    | NA    | 7.9   | 0.5 |
| Chitstone-Spot 305 | 86   | 100    | 1.4 | 6.6328   | 67.5  | 0.0254 | 67.7  | 0.0012 | 4.7  | 0.07 | 7.9   | 0.4 | 25.5  | 17.1 | NA    | NA    | 7.9   | 0.4 |
| Chitstone-Spot 32  | 149  | 547    | 2.8 | 207.7158 | 24.6  | 0.0008 | 25.0  | 0.0012 | 4.5  | 0.18 | 7.9   | 0.4 | 0.8   | 0.2  | NA    | NA    | 7.9   | 0.4 |
| Chitstone-Spot 10  | 185  | 638    | 1.2 | 22.5020  | 11.0  | 0.0075 | 12.8  | 0.0012 | 6.5  | 0.51 | 7.9   | 0.5 | 7.6   | 1.0  | NA    | NA    | 7.9   | 0.5 |
| Chitstone-Spot 176 | 139  | 3034   | 1.2 | 19.4002  | 8.3   | 0.0087 | 9.7   | 0.0012 | 5.0  | 0.52 | 7.9   | 0.4 | 8.8   | 0.9  | 265.3 | 191.6 | 7.9   | 0.4 |
| Chitstone-Spot 229 | 151  | 837    | 1.1 | 67.1006  | 21.4  | 0.0025 | 22.1  | 0.0012 | 5.4  | 0.25 | 7.9   | 0.4 | 2.6   | 0.6  | NA    | NA    | 7.9   | 0.4 |
| Chitstone-Spot 42  | 138  | 2084   | 1.2 | 15.9484  | 10.8  | 0.0106 | 13.2  | 0.0012 | 7.7  | 0.58 | 7.9   | 0.6 | 10.7  | 1.4  | 698.1 | 230.8 | 7.9   | 0.6 |
| Chitstone-Spot 11  | 98   | 557    | 1.4 | 2.0542   | 50.0  | 0.0824 | 50.5  | 0.0012 | 7.4  | 0.15 | 7.9   | 0.6 | 80.4  | 39.1 | NA    | NA    | 7.9   | 0.6 |
| Chitstone-Spot 257 | 126  | 1089   | 1.3 | 30.7865  | 10.9  | 0.0055 | 12.8  | 0.0012 | 6.7  | 0.52 | 7.9   | 0.5 | 5.6   | 0.7  | NA    | NA    | 7.9   | 0.5 |
| Chitstone-Spot 120 | 204  | 402    | 1.2 | 99.8189  | 7.3   | 0.0017 | 8.8   | 0.0012 | 4.9  | 0.56 | 7.9   | 0.4 | 1.7   | 0.2  | NA    | NA    | 7.9   | 0.4 |
| Chitstone-Spot 149 | 212  | 2904   | 1.2 | 33.5274  | 6.2   | 0.0051 | 8.0   | 0.0012 | 5.0  | 0.62 | 7.9   | 0.4 | 5.1   | 0.4  | NA    | NA    | 7.9   | 0.4 |
| Chitstone-Spot 199 | 128  | 649    | 1.2 | 28.4998  | 10.3  | 0.0060 | 12.4  | 0.0012 | 6.9  | 0.56 | 8.0   | 0.6 | 6.0   | 0.7  | NA    | NA    | 8.0   | 0.6 |
| Chitstone-Spot 1   | 1062 | 7380   | 1.5 | 21.4681  | 4.3   | 0.0079 | 5.1   | 0.0012 | 2.8  | 0.55 | 8.0   | 0.2 | 8.0   | 0.4  | 27.8  | 102.1 | 8.0   | 0.2 |
| Chitstone-Spot 54  | 346  | 625    | 0.9 | 35.4753  | 28.1  | 0.0048 | 28.4  | 0.0012 | 4.2  | 0.15 | 8.0   | 0.3 | 4.9   | 1.4  | NA    | NA    | 8.0   | 0.3 |
| Chitstone-Spot 140 | 134  | 890    | 1.2 | 62.6477  | 9.7   | 0.0027 | 11.4  | 0.0012 | 6.1  | 0.54 | 8.0   | 0.5 | 2.8   | 0.3  | NA    | NA    | 8.0   | 0.5 |
| Chitstone-Spot 65  | 226  | 4301   | 1.1 | 22.8128  | 6.8   | 0.0075 | 8.7   | 0.0012 | 5.4  | 0.62 | 8.0   | 0.4 | 7.6   | 0.7  | NA    | NA    | 8.0   | 0.4 |
| Chitstone-Spot 64  | 106  | 433    | 1.2 | 34.7099  | 28.1  | 0.0049 | 28.9  | 0.0012 | 6.9  | 0.24 | 8.0   | 0.6 | 5.0   | 1.4  | NA    | NA    | 8.0   | 0.6 |
| Chitstone-Spot 123 | 95   | 403    | 1.3 | 171.7806 | 176.7 | 0.0010 | 176.8 | 0.0012 | 6.5  | 0.04 | 8.0   | 0.5 | 1.0   | 1.8  | NA    | NA    | 8.0   | 0.5 |
| Chitstone-Spot 207 | 152  | 404    | 1.3 | 539.3262 | 155.3 | 0.0003 | 155.4 | 0.0012 | 5.4  | 0.03 | 8.0   | 0.4 | 0.3   | 0.5  | NA    | NA    | 8.0   | 0.4 |
| Chitstone-Spot 162 | 92   | 734    | 1.9 | 52.6175  | 6.7   | 0.0033 | 10.2  | 0.0012 | 7.7  | 0.75 | 8.0   | 0.6 | 3.3   | 0.3  | NA    | NA    | 8.0   | 0.6 |
| Chitstone-Spot 161 | 467  | 3637   | 0.7 | 18.6406  | 6.5   | 0.0092 | 7.5   | 0.0012 | 3.7  | 0.49 | 8.0   | 0.3 | 9.3   | 0.7  | 356.2 | 146.5 | 8.0   | 0.3 |
| Chitstone-Spot 101 | 283  | 563    | 0.9 | 39.2538  | 19.6  | 0.0044 | 20.0  | 0.0012 | 3.9  | 0.19 | 8.0   | 0.3 | 4.4   | 0.9  | NA    | NA    | 8.0   | 0.3 |
| Chitstone-Spot 113 | 166  | 560    | 1.3 | 35.4371  | 12.8  | 0.0048 | 14.1  | 0.0012 | 6.0  | 0.43 | 8.0   | 0.5 | 4.9   | 0.7  | NA    | NA    | 8.0   | 0.5 |
| Chitstone-Spot 233 | 165  | 461    | 2.4 | 50.6246  | 85.7  | 0.0034 | 85.9  | 0.0012 | 5.4  | 0.06 | 8.0   | 0.4 | 3.4   | 3.0  | NA    | NA    | 8.0   | 0.4 |
| Chitstone-Spot 282 | 175  | 1488   | 1.2 | 20.6556  | 8.0   | 0.0083 | 9.3   | 0.0012 | 4.9  | 0.52 | 8.0   | 0.4 | 8.4   | 0.8  | 119.5 | 187.8 | 8.0   | 0.4 |
| Chitstone-Spot 115 | 483  | 3051   | 0.9 | 21.6123  | 6.7   | 0.0080 | 7.6   | 0.0013 | 3.6  | 0.47 | 8.1   | 0.3 | 8.1   | 0.6  | 11.7  | 161.9 | 8.1   | 0.3 |
| Chitstone-Spot 263 | 332  | 608    | 1.0 | 37.8416  | 6.3   | 0.0046 | 7.5   | 0.0013 | 4.2  | 0.55 | 8.1   | 0.3 | 4.6   | 0.3  | NA    | NA    | 8.1   | 0.3 |
| Chitstone-Spot 292 | 167  | 745    | 1.2 | 30.8202  | 17.8  | 0.0056 | 18.7  | 0.0013 | 5.7  | 0.30 | 8.1   | 0.5 | 5.7   | 1.1  | NA    | NA    | 8.1   | 0.5 |
| Chitstone-Spot 212 | 223  | 3806   | 1.1 | 20.1380  | 7.8   | 0.0086 | 8.7   | 0.0013 | 3.8  | 0.44 | 8.1   | 0.3 | 8.7   | 0.8  | 179.0 | 182.4 | 8.1   | 0.3 |
| Chitstone-Spot 34  | 87   | 748    | 1.3 | 22.2654  | 12.2  | 0.0078 | 14.3  | 0.0013 | 7.4  | 0.52 | 8.1   | 0.6 | 7.8   | 1.1  | NA    | NA    | 8.1   | 0.6 |
| Chitstone-Spot 129 | 167  | 513    | 1.7 | 51.5958  | 20.3  | 0.0034 | 21.2  | 0.0013 | 6.1  | 0.29 | 8.1   | 0.5 | 3.4   | 0.7  | NA    | NA    | 8.1   | 0.5 |
| Chitstone-Spot 152 | 159  | 1196   | 1.5 | 26.6283  | 7.9   | 0.0065 | 9.5   | 0.0013 | 5.3  | 0.56 | 8.1   | 0.4 | 6.6   | 0.6  | NA    | NA    | 8.1   | 0.4 |
| Chitstone-Spot 17  | 652  | 1297   | 0.9 | 26.7342  | 6.1   | 0.0065 | 6.8   | 0.0013 | 3.0  | 0.44 | 8.1   | 0.2 | 6.6   | 0.4  | NA    | NA    | 8.1   | 0.2 |
| Chitstone-Spot 105 | 482  | 10805  | 0.8 | 20.5285  | 4.6   | 0.0084 | 5.9   | 0.0013 | 3.6  | 0.62 | 8.1   | 0.3 | 8.5   | 0.5  | 134.0 | 108.9 | 8.1   | 0.3 |
| Chitstone-Spot 183 | 401  | 972    | 0.9 | 25.2137  | 6.4   | 0.0069 | 7.8   | 0.0013 | 4.4  | 0.56 | 8.1   | 0.4 | 7.0   | 0.5  | NA    | NA    | 8.1   | 0.4 |
| Chitstone-Spot 159 | 223  | 121799 | 1.9 | 16.7742  | 8.5   | 0.0104 | 9.8   | 0.0013 | 4.8  | 0.49 | 8.1   | 0.4 | 10.5  | 1.0  | 589.7 | 184.6 | 8.1   | 0.4 |
| Chitstone-Spot 19  | 225  | 523    | 1.4 | 51.9334  | 20.4  | 0.0033 | 21.0  | 0.0013 | 5.1  | 0.24 | 8.1   | 0.4 | 3.4   | 0.7  | NA    | NA    | 8.1   | 0.4 |
| Chitstone-Spot 170 | 457  | 28415  | 1.7 | 25.5980  | 4.6   | 0.0068 | 6.2   | 0.0013 | 4.2  | 0.67 | 8.1   | 0.3 | 6.9   | 0.4  | NA    | NA    | 8.1   | 0.3 |
| Chitstone-Spot 119 | 113  | 2330   | 1.4 | 37.3854  | 7.4   | 0.0047 | 9.2   | 0.0013 | 5.5  | 0.59 | 8.1   | 0.4 | 4.7   | 0.4  | NA    | NA    | 8.1   | 0.4 |
| Chitstone-Spot 107 | 361  | 1245   | 0.9 | 25.5691  | 7.5   | 0.0068 | 8.1   | 0.0013 | 3.0  | 0.37 | 8.2   | 0.2 | 6.9   | 0.6  | NA    | NA    | 8.2   | 0.2 |
| Chitstone-Spot 4   | 163  | 1989   | 1.3 | 20.5452  | 9.8   | 0.0085 | 11.2  | 0.0013 | 5.5  | 0.49 | 8.2   | 0.5 | 8.6   | 1.0  | 132.1 | 230.5 | 8.2   | 0.5 |
| Chitstone-Spot 250 | 141  | 861    | 1.2 | 34.5890  | 10.2  | 0.0051 | 11.6  | 0.0013 | 5.7  | 0.49 | 8.2   | 0.5 | 5.1   | 0.6  | NA    | NA    | 8.2   | 0.5 |
| Chitstone-Spot 185 | 66   | 491    | 1.5 | 23.98    |       |        |       |        |      |      |       |     |       |      |       |       |       |     |

|                    |      |        |     |            |         |        |         |        |      |      |     |     |      |      |        |       |     |     |
|--------------------|------|--------|-----|------------|---------|--------|---------|--------|------|------|-----|-----|------|------|--------|-------|-----|-----|
| Chitstone-Spot 104 | 86   | 451    | 1.7 | 55.4632    | 10.2    | 0.0032 | 11.7    | 0.0013 | 5.8  | 0.49 | 8.3 | 0.5 | 3.2  | 0.4  | NA     | NA    | 8.3 | 0.5 |
| Chitstone-Spot 150 | 311  | 653    | 1.2 | 31.1823    | 33.3    | 0.0057 | 33.6    | 0.0013 | 3.9  | 0.12 | 8.3 | 0.3 | 5.8  | 1.9  | NA     | NA    | 8.3 | 0.3 |
| Chitstone-Spot 56  | 115  | 2685   | 1.4 | 2.0155     | 50.0    | 0.0881 | 50.4    | 0.0013 | 6.0  | 0.12 | 8.3 | 0.5 | 85.7 | 41.4 | NA     | NA    | 8.3 | 0.5 |
| Chitstone-Spot 20  | 181  | 1063   | 1.6 | 18.5229    | 9.3     | 0.0096 | 10.3    | 0.0013 | 4.5  | 0.44 | 8.3 | 0.4 | 9.7  | 1.0  | 370.5  | 209.6 | 8.3 | 0.4 |
| Chitstone-Spot 306 | 440  | 2747   | 0.9 | 22.1975    | 5.0     | 0.0080 | 6.2     | 0.0013 | 3.5  | 0.58 | 8.3 | 0.3 | 8.1  | 0.5  | NA     | NA    | 8.3 | 0.3 |
| Chitstone-Spot 94  | 244  | 1098   | 1.8 | 29.2371    | 8.1     | 0.0061 | 9.0     | 0.0013 | 3.9  | 0.43 | 8.3 | 0.3 | 6.2  | 0.5  | NA     | NA    | 8.3 | 0.3 |
| Chitstone-Spot 25  | 172  | 1153   | 1.1 | 32.5297    | 15.0    | 0.0055 | 15.9    | 0.0013 | 5.3  | 0.33 | 8.3 | 0.4 | 5.5  | 0.9  | NA     | NA    | 8.3 | 0.4 |
| Chitstone-Spot 73  | 105  | 568    | 1.3 | 90.9280    | 29.1    | 0.0020 | 29.6    | 0.0013 | 5.5  | 0.19 | 8.3 | 0.5 | 2.0  | 0.6  | NA     | NA    | 8.3 | 0.5 |
| Chitstone-Spot 108 | 124  | 819    | 1.4 | 32.4494    | 11.8    | 0.0055 | 13.4    | 0.0013 | 6.2  | 0.47 | 8.3 | 0.5 | 5.6  | 0.7  | NA     | NA    | 8.3 | 0.5 |
| Chitstone-Spot 267 | 311  | 3502   | 0.8 | 20.8033    | 6.3     | 0.0086 | 7.5     | 0.0013 | 4.0  | 0.53 | 8.3 | 0.3 | 8.7  | 0.6  | 102.7  | 149.8 | 8.3 | 0.3 |
| Chitstone-Spot 196 | 100  | 500    | 1.3 | 58.3870    | 20.2    | 0.0031 | 21.2    | 0.0013 | 6.7  | 0.31 | 8.4 | 0.6 | 3.1  | 0.7  | NA     | NA    | 8.4 | 0.6 |
| Chitstone-Spot 146 | 160  | 637    | 1.0 | 42.7300    | 22.1    | 0.0042 | 22.6    | 0.0013 | 5.1  | 0.23 | 8.4 | 0.4 | 4.2  | 1.0  | NA     | NA    | 8.4 | 0.4 |
| Chitstone-Spot 209 | 443  | 12215  | 0.8 | 21.6646    | 5.1     | 0.0083 | 6.8     | 0.0013 | 4.5  | 0.66 | 8.4 | 0.4 | 8.4  | 0.6  | 5.9    | 121.7 | 8.4 | 0.4 |
| Chitstone-Spot 235 | 215  | 1283   | 1.1 | 28.1945    | 7.0     | 0.0064 | 8.3     | 0.0013 | 4.6  | 0.55 | 8.4 | 0.4 | 6.4  | 0.5  | NA     | NA    | 8.4 | 0.4 |
| Chitstone-Spot 228 | 114  | 3799   | 1.5 | 15.0866    | 11.3    | 0.0119 | 13.8    | 0.0013 | 7.9  | 0.57 | 8.4 | 0.7 | 12.0 | 1.6  | 815.4  | 236.7 | 8.4 | 0.7 |
| Chitstone-Spot 241 | 202  | 905    | 2.4 | 27.1466    | 19.7    | 0.0066 | 20.1    | 0.0013 | 4.4  | 0.22 | 8.4 | 0.4 | 6.7  | 1.3  | NA     | NA    | 8.4 | 0.4 |
| Chitstone-Spot 2   | 254  | 2150   | 0.8 | 23.0494    | 7.5     | 0.0078 | 8.5     | 0.0013 | 3.9  | 0.46 | 8.4 | 0.3 | 7.9  | 0.7  | NA     | NA    | 8.4 | 0.3 |
| Chitstone-Spot 139 | 113  | 1355   | 1.3 | 27.0769    | 8.8     | 0.0066 | 11.0    | 0.0013 | 6.6  | 0.60 | 8.4 | 0.6 | 6.7  | 0.7  | NA     | NA    | 8.4 | 0.6 |
| Chitstone-Spot 216 | 291  | 966    | 2.1 | 31.2245    | 17.5    | 0.0057 | 18.1    | 0.0013 | 4.4  | 0.24 | 8.4 | 0.4 | 5.8  | 1.0  | NA     | NA    | 8.4 | 0.4 |
| Chitstone-Spot 264 | 242  | 1084   | 1.2 | 34.2372    | 7.3     | 0.0052 | 8.3     | 0.0013 | 4.1  | 0.49 | 8.4 | 0.3 | 5.3  | 0.4  | NA     | NA    | 8.4 | 0.3 |
| Chitstone-Spot 310 | 221  | 6700   | 1.1 | 16.1966    | 8.5     | 0.0111 | 9.4     | 0.0013 | 4.2  | 0.44 | 8.4 | 0.3 | 11.2 | 1.1  | 665.2  | 181.8 | 8.4 | 0.3 |
| Chitstone-Spot 49  | 202  | 4955   | 1.8 | 20.4456    | 7.0     | 0.0088 | 8.4     | 0.0013 | 4.6  | 0.54 | 8.4 | 0.4 | 8.9  | 0.7  | 143.5  | 165.4 | 8.4 | 0.4 |
| Chitstone-Spot 86  | 187  | 832    | 1.0 | 58.8040    | 8.3     | 0.0031 | 9.9     | 0.0013 | 5.3  | 0.54 | 8.4 | 0.4 | 3.1  | 0.3  | NA     | NA    | 8.4 | 0.4 |
| Chitstone-Spot 178 | 150  | 1010   | 1.3 | 42.9482    | 7.9     | 0.0042 | 10.5    | 0.0013 | 6.9  | 0.66 | 8.4 | 0.6 | 4.2  | 0.4  | NA     | NA    | 8.4 | 0.6 |
| Chitstone-Spot 268 | 271  | 1139   | 2.7 | 50.4132    | 10.8    | 0.0036 | 11.4    | 0.0013 | 3.5  | 0.31 | 8.4 | 0.3 | 3.6  | 0.4  | NA     | NA    | 8.4 | 0.3 |
| Chitstone-Spot 67  | 158  | 777    | 1.1 | 38.4655    | 14.3    | 0.0047 | 15.3    | 0.0013 | 5.5  | 0.36 | 8.4 | 0.5 | 4.7  | 0.7  | NA     | NA    | 8.4 | 0.5 |
| Chitstone-Spot 69  | 204  | 881    | 1.0 | 53.9609    | 10.4    | 0.0033 | 11.4    | 0.0013 | 4.8  | 0.42 | 8.4 | 0.4 | 3.4  | 0.4  | NA     | NA    | 8.4 | 0.4 |
| Chitstone-Spot 279 | 110  | 2513   | 1.5 | 36.8071    | 5.3     | 0.0049 | 7.7     | 0.0013 | 5.6  | 0.73 | 8.4 | 0.5 | 5.0  | 0.4  | NA     | NA    | 8.4 | 0.5 |
| Chitstone-Spot 220 | 80   | 409    | 1.7 | 33.6512    | 15.8    | 0.0054 | 16.7    | 0.0013 | 5.5  | 0.33 | 8.4 | 0.5 | 5.4  | 0.9  | NA     | NA    | 8.4 | 0.5 |
| Chitstone-Spot 23  | 231  | 440    | 1.2 | 43366.4269 | 19893.4 | 0.0000 | 19893.4 | 0.0013 | 5.9  | 0.00 | 8.4 | 0.5 | 0.0  | 0.8  | NA     | NA    | 8.4 | 0.5 |
| Chitstone-Spot 39  | 662  | 5744   | 1.0 | 23.0986    | 4.4     | 0.0078 | 5.9     | 0.0013 | 3.9  | 0.67 | 8.5 | 0.3 | 7.9  | 0.5  | NA     | NA    | 8.5 | 0.3 |
| Chitstone-Spot 168 | 293  | 1926   | 1.2 | 17.5158    | 8.6     | 0.0103 | 9.8     | 0.0013 | 4.7  | 0.48 | 8.5 | 0.4 | 10.4 | 1.0  | 495.1  | 190.0 | 8.5 | 0.4 |
| Chitstone-Spot 163 | 152  | 1510   | 1.4 | 21.5844    | 10.5    | 0.0084 | 11.8    | 0.0013 | 5.5  | 0.46 | 8.5 | 0.5 | 8.5  | 1.0  | 14.8   | 252.7 | 8.5 | 0.5 |
| Chitstone-Spot 226 | 118  | 1035   | 1.4 | 27.5994    | 10.4    | 0.0066 | 12.2    | 0.0013 | 6.4  | 0.52 | 8.5 | 0.5 | 6.6  | 0.8  | NA     | NA    | 8.5 | 0.5 |
| Chitstone-Spot 201 | 291  | 1189   | 1.1 | 30.9334    | 20.3    | 0.0059 | 20.9    | 0.0013 | 4.7  | 0.23 | 8.5 | 0.4 | 5.9  | 1.2  | NA     | NA    | 8.5 | 0.4 |
| Chitstone-Spot 239 | 48   | 1696   | 1.5 | 33.4094    | 6.0     | 0.0054 | 11.9    | 0.0013 | 10.3 | 0.86 | 8.5 | 0.9 | 5.5  | 0.7  | NA     | NA    | 8.5 | 0.9 |
| Chitstone-Spot 116 | 113  | 63567  | 1.7 | 10.3466    | 13.8    | 0.0176 | 15.3    | 0.0013 | 6.6  | 0.43 | 8.5 | 0.6 | 17.7 | 2.7  | 1560.4 | 260.7 | 8.5 | 0.6 |
| Chitstone-Spot 79  | 96   | 407    | 1.4 | 49.2036    | 13.6    | 0.0037 | 15.6    | 0.0013 | 7.7  | 0.49 | 8.5 | 0.7 | 3.7  | 0.6  | NA     | NA    | 8.5 | 0.7 |
| Chitstone-Spot 122 | 525  | 5522   | 0.6 | 23.3550    | 5.0     | 0.0078 | 5.9     | 0.0013 | 3.2  | 0.53 | 8.5 | 0.3 | 7.9  | 0.5  | NA     | NA    | 8.5 | 0.3 |
| Chitstone-Spot 288 | 204  | 2694   | 1.3 | 16.1498    | 8.9     | 0.0114 | 10.0    | 0.0013 | 4.5  | 0.45 | 8.6 | 0.4 | 11.5 | 1.1  | 671.3  | 191.6 | 8.6 | 0.4 |
| Chitstone-Spot 165 | 100  | 430    | 1.3 | 316.2196   | 109.9   | 0.0006 | 110.1   | 0.0013 | 6.6  | 0.06 | 8.6 | 0.6 | 0.6  | 0.6  | NA     | NA    | 8.6 | 0.6 |
| Chitstone-Spot 253 | 122  | 10889  | 1.3 | 13.5259    | 9.1     | 0.0136 | 10.6    | 0.0013 | 5.4  | 0.51 | 8.6 | 0.5 | 13.7 | 1.4  | 1039.6 | 183.8 | 8.6 | 0.5 |
| Chitstone-Spot 160 | 144  | 635    | 1.9 | 41.1380    | 19.4    | 0.0045 | 20.0    | 0.0013 | 5.1  | 0.26 | 8.6 | 0.4 | 4.5  | 0.9  | NA     | NA    | 8.6 | 0.4 |
| Chitstone-Spot 53  | 146  | 1405   | 1.0 | 25.4098    | 15.8    | 0.0072 | 16.4    | 0.0013 | 4.7  | 0.29 | 8.6 | 0.4 | 7.3  | 1.2  | NA     | NA    | 8.6 | 0.4 |
| Chitstone-Spot 190 | 140  | 4988   | 1.2 | 13.5430    | 11.5    | 0.0136 | 12.7    | 0.0013 | 5.4  | 0.42 | 8.6 | 0.5 | 13.7 | 1.7  | 1037.1 | 233.1 | 8.6 | 0.5 |
| Chitstone-Spot 294 | 251  | 2805   | 1.7 | 14.7093    | 8.6     | 0.0126 | 9.7     | 0.0013 | 4.4  | 0.46 | 8.6 | 0.4 | 12.7 | 1.2  | 868.1  | 179.4 | 8.6 | 0.4 |
| Chitstone-Spot 252 | 87   | 421    | 1.2 | 244.5322   | 317.8   | 0.0008 | 317.9   | 0.0013 | 7.5  | 0.02 | 8.6 | 0.6 | 0.8  | 2.4  | NA     | NA    | 8.6 | 0.6 |
| Chitstone-Spot 299 | 154  | 12452  | 2.0 | 24.2318    | 7.5     | 0.0076 | 8.9     | 0.0013 | 4.7  | 0.54 | 8.7 | 0.4 | 7.7  | 0.7  | NA     | NA    | 8.7 | 0.4 |
| Chitstone-Spot 156 | 55   | 1433   | 1.6 | 36.4546    | 6.8     | 0.0051 | 10.2    | 0.0013 | 7.6  | 0.75 | 8.7 | 0.7 | 5.1  | 0.5  | NA     | NA    | 8.7 | 0.7 |
| Chitstone-Spot 224 | 189  | 1536   | 1.2 | 17.4729    | 10.7    | 0.0106 | 11.6    | 0.0013 | 4.5  | 0.39 | 8.7 | 0.4 | 10.7 | 1.2  | 500.5  | 235.7 | 8.7 | 0.4 |
| Chitstone-Spot 297 | 292  | 2706   | 2.5 | 22.3928    | 7.0     | 0.0083 | 8.0     | 0.0014 | 3.9  | 0.49 | 8.7 | 0.3 | 8.4  | 0.7  | NA     | NA    | 8.7 | 0.3 |
| Chitstone-Spot 198 | 170  | 1911   | 1.1 | 17.4374    | 9.8     | 0.0107 | 10.8    | 0.0014 | 4.7  | 0.43 | 8.7 | 0.4 | 10.8 | 1.2  | 505.0  | 215.5 | 8.7 | 0.4 |
| Chitstone-Spot 234 | 122  | 4932   | 1.3 | 29.3763    | 6.8     | 0.0064 | 9.0     | 0.0014 | 5.9  | 0.66 | 8.7 | 0.5 | 6.4  | 0.6  | NA     | NA    | 8.7 | 0.5 |
| Chitstone-Spot 102 | 117  | 1854   | 1.3 | 16.6121    | 9.7     | 0.0113 | 10.7    | 0.0014 | 4.6  | 0.43 | 8.8 | 0.4 | 11.4 | 1.2  | 610.6  | 209.6 | 8.8 | 0.4 |
| Chitstone-Spot 260 | 90   | 707    | 1.7 | 59.5623    | 8.1     | 0.0032 | 10.5    | 0.0014 | 6.6  | 0.63 | 8.8 | 0.6 | 3.2  | 0.3  | NA     | NA    | 8.8 | 0.6 |
| Chitstone-Spot 112 | 162  | 1396   | 1.7 | 27.4706    | 7.7     | 0.0068 | 8.9     | 0.0014 | 4.5  | 0.51 | 8.8 | 0.4 | 6.9  | 0.6  | NA     | NA    | 8.8 | 0.4 |
| Chitstone-Spot 143 | 214  | 1347   | 1.2 | 39.2600    | 7.4     | 0.0048 | 9.1     | 0.0014 | 5.2  | 0.57 | 8.8 | 0.5 | 4.9  | 0.4  | NA     | NA    | 8.8 | 0.5 |
| Chitstone-Spot 308 | 263  | 4464   | 1.2 | 26.8417    | 5.6     | 0.0071 | 6.8     | 0.0014 | 3.8  | 0.56 | 8.9 | 0.3 | 7.2  | 0.5  | NA     | NA    | 8.9 | 0.3 |
| Chitstone-Spot 37  | 87   | 1030   | 1.8 | 22.6474    | 11.4    | 0.0084 | 13.4    | 0.0014 | 7.0  | 0.52 | 8.9 | 0.6 | 8.5  | 1.1  | NA     | NA    | 8.9 | 0.6 |
| Chitstone-Spot 189 | 249  | 4274   | 0.9 | 26.7003    | 6.1     | 0.0071 | 7.2     | 0.0014 | 3.9  | 0.54 | 8.9 | 0.3 | 7.2  | 0.5  | NA     | NA    | 8.9 | 0.3 |
| Chitstone-Spot 40  | 357  | 548720 | 1.1 | 22.2792    | 5.3     | 0.0085 | 6.2     | 0.0014 | 3.2  | 0.51 | 8.9 | 0.3 | 8.6  | 0.5  | NA     | NA    | 8.9 | 0.3 |
| Chitstone-Spot 302 | 320  | 1684   | 0.9 | 22.8260    | 5.6     | 0.0084 | 7.3     | 0.0014 | 4.7  | 0.65 | 8.9 | 0.4 | 8.4  | 0.6  | NA     | NA    | 8.9 | 0.4 |
| Chitstone-Spot 232 | 108  | 1216   | 1.2 | 10.0846    | 14.0    | 0.0190 | 15.2    | 0.0014 | 6.0  | 0.39 | 9.0 | 0.5 | 19.1 | 2.9  | 1608.4 | 261.6 | 9.0 | 0.5 |
| Chitstone-Spot 138 | 106  | 1155   | 1.6 | 49.9728    | 6.0     | 0.0038 | 9.2     | 0.0014 | 6.9  | 0.75 | 9.0 | 0.6 | 3.9  | 0.4  | NA     | NA    | 9.0 | 0.6 |
| Chitstone-Spot 227 | 1175 | 9693   | 0.8 | 21.4158    | 3.7     | 0.0090 | 5.6     | 0.0014 | 4.2  | 0.75 | 9.0 | 0.4 | 9.1  | 0.5  | 33.6   | 88.0  | 9.0 | 0.4 |
| Chitstone-Spot 248 | 230  | 2163   | 1.2 | 30.5502    | 7.8     | 0.0064 | 8.8     | 0.0014 | 4.0  | 0.46 | 9.1 | 0.4 | 6.4  | 0.6  | NA     | NA    | 9.1 | 0.4 |
| Chitstone-Spot 261 | 298  | 6037   | 1.1 | 16.9085    | 7.3     | 0.0115 | 8.8     | 0.0014 | 4.9  | 0.56 | 9.1 | 0.4 | 11.6 | 1.0  | 572.3  | 158.7 | 9.1 | 0.4 |
| Chitstone-Spot 254 | 203  | 2402   | 0.9 | 32.8453    | 6.6     | 0.0059 | 8.1     | 0.0014 | 4.8  | 0.59 | 9.1 | 0.4 | 6.0  | 0.5  | NA     | NA    | 9.1 | 0.4 |
| Chitstone-Spot 285 | 110  | 2322   | 1.6 | 16.2178    | 11.5    | 0.0120 | 12.8    | 0.0014 | 5.8  | 0.45 | 9.1 | 0.5 | 12.1 | 1.5  | 662.3  | 246.3 | 9.1 | 0.5 |
| Chitstone-Spot 215 | 99   | 520    | 1.8 | 33.4319    | 10.4    | 0.0058 | 11.9    | 0.0014 | 5.8  | 0.49 | 9.1 | 0.5 | 5.9  | 0.7  | NA     | NA    | 9.1 | 0.5 |
| Chitstone-Spot 272 | 639  | 4096   | 1.2 | 25.9897    | 5.2     | 0.0076 | 6.2     | 0.0014 | 3.3  | 0.53 | 9.3 | 0.3 | 7.7  | 0.5  | NA     | NA    | 9.3 |     |

|                    |      |         |      |          |       |        |       |        |      |      |       |      |       |      |        |       |       |      |
|--------------------|------|---------|------|----------|-------|--------|-------|--------|------|------|-------|------|-------|------|--------|-------|-------|------|
| Chitstone-Spot 273 | 131  | 532     | 1.9  | 154.8334 | 229.4 | 0.0015 | 229.4 | 0.0017 | 4.9  | 0.02 | 10.8  | 0.5  | 1.5   | 3.5  | NA     | NA    | 10.8  | 0.5  |
| Chitstone-Spot 312 | 128  | 670     | 1.1  | 40.9870  | 15.4  | 0.0059 | 20.0  | 0.0018 | 12.7 | 0.64 | 11.3  | 1.4  | 6.0   | 1.2  | NA     | NA    | 11.3  | 1.4  |
| Chitstone-Spot 222 | 239  | 4962    | 1.1  | 4.6303   | 7.5   | 0.0544 | 9.6   | 0.0018 | 5.9  | 0.62 | 11.8  | 0.7  | 53.8  | 5.0  | 2950.9 | 121.9 | 11.8  | 0.7  |
| Chitstone-Spot 278 | 127  | 1145    | 3.9  | 22.7571  | 8.9   | 0.0112 | 10.9  | 0.0018 | 6.3  | 0.58 | 11.9  | 0.7  | 11.3  | 1.2  | NA     | NA    | 11.9  | 0.7  |
| Chitstone-Spot 287 | 591  | 6681    | 1.9  | 21.5945  | 2.8   | 0.0520 | 4.2   | 0.0082 | 3.1  | 0.74 | 52.3  | 1.6  | 51.5  | 2.1  | 13.7   | 66.6  | 52.3  | 1.6  |
| Chitstone-Spot 77  | 1043 | 34264   | 1.9  | 21.6844  | 1.5   | 0.0589 | 2.9   | 0.0093 | 2.5  | 0.86 | 59.4  | 1.5  | 58.1  | 1.7  | 3.7    | 35.9  | 59.4  | 1.5  |
| Chitstone-Spot 191 | 783  | 38648   | 4.0  | 21.0910  | 1.8   | 0.0746 | 3.6   | 0.0114 | 3.1  | 0.86 | 73.2  | 2.3  | 73.1  | 2.6  | 70.1   | 43.8  | 73.2  | 2.3  |
| Chitstone-Spot 127 | 631  | 31709   | 4.2  | 22.0548  | 1.8   | 0.0732 | 3.0   | 0.0117 | 2.4  | 0.80 | 75.1  | 1.8  | 71.7  | 2.1  | NA     | NA    | 75.1  | 1.8  |
| Chitstone-Spot 145 | 44   | 6660    | 3.4  | 23.8318  | 4.3   | 0.1057 | 6.0   | 0.0183 | 4.1  | 0.70 | 116.8 | 4.8  | 102.0 | 5.8  | NA     | NA    | 116.8 | 4.8  |
| Chitstone-Spot 83  | 209  | 11725   | 2.2  | 19.6057  | 2.5   | 0.1579 | 3.9   | 0.0225 | 3.1  | 0.78 | 143.2 | 4.4  | 148.8 | 5.5  | 241.1  | 56.8  | 143.2 | 4.4  |
| Chitstone-Spot 202 | 128  | 7360    | 4.4  | 22.3957  | 2.3   | 0.1409 | 4.2   | 0.0229 | 3.5  | 0.83 | 146.0 | 5.0  | 133.9 | 5.2  | NA     | NA    | 146.0 | 5.0  |
| Chitstone-Spot 206 | 129  | 20694   | 4.6  | 20.4943  | 2.5   | 0.1544 | 3.8   | 0.0230 | 2.9  | 0.76 | 146.3 | 4.2  | 145.8 | 5.2  | 138.0  | 58.9  | 146.3 | 4.2  |
| Chitstone-Spot 48  | 162  | 10149   | 4.4  | 21.0973  | 2.3   | 0.1508 | 4.0   | 0.0231 | 3.2  | 0.82 | 147.1 | 4.7  | 142.6 | 5.3  | 69.4   | 54.1  | 147.1 | 4.7  |
| Chitstone-Spot 240 | 168  | 9211    | 4.3  | 20.9102  | 2.2   | 0.1522 | 3.5   | 0.0231 | 2.6  | 0.77 | 147.2 | 3.8  | 143.8 | 4.6  | 90.6   | 52.7  | 147.2 | 3.8  |
| Chitstone-Spot 164 | 437  | 32132   | 2.0  | 20.8570  | 1.9   | 0.1533 | 3.5   | 0.0232 | 3.0  | 0.85 | 147.8 | 4.3  | 144.8 | 4.7  | 96.6   | 44.0  | 147.8 | 4.3  |
| Chitstone-Spot 51  | 41   | 1770    | 4.6  | 21.6677  | 6.1   | 0.1485 | 6.9   | 0.0233 | 3.2  | 0.46 | 148.7 | 4.7  | 140.6 | 9.0  | 5.6    | 147.3 | 148.7 | 4.7  |
| Chitstone-Spot 172 | 202  | 41561   | 4.0  | 20.8842  | 2.1   | 0.1547 | 3.3   | 0.0234 | 2.6  | 0.78 | 149.3 | 3.8  | 146.0 | 4.5  | 93.5   | 48.8  | 149.3 | 3.8  |
| Chitstone-Spot 186 | 586  | 62160   | 1.9  | 20.9171  | 1.7   | 0.1544 | 3.5   | 0.0234 | 3.0  | 0.87 | 149.4 | 4.5  | 145.8 | 4.8  | 89.8   | 41.1  | 149.4 | 4.5  |
| Chitstone-Spot 6   | 301  | 12812   | 3.3  | 21.0217  | 1.6   | 0.1541 | 3.4   | 0.0235 | 3.0  | 0.88 | 149.7 | 4.4  | 145.5 | 4.6  | 77.9   | 38.4  | 149.7 | 4.4  |
| Chitstone-Spot 274 | 161  | 86915   | 3.8  | 21.0061  | 2.1   | 0.1548 | 3.7   | 0.0236 | 3.0  | 0.82 | 150.3 | 4.4  | 146.1 | 5.0  | 79.7   | 50.0  | 150.3 | 4.4  |
| Chitstone-Spot 169 | 298  | 39323   | 3.2  | 20.8997  | 1.7   | 0.1556 | 3.6   | 0.0236 | 3.2  | 0.88 | 150.4 | 4.7  | 146.9 | 4.9  | 91.7   | 40.2  | 150.4 | 4.7  |
| Chitstone-Spot 27  | 229  | 40208   | 4.0  | 20.7949  | 1.8   | 0.1565 | 4.5   | 0.0236 | 4.1  | 0.91 | 150.4 | 6.1  | 147.6 | 6.2  | 103.6  | 43.4  | 150.4 | 6.1  |
| Chitstone-Spot 33  | 226  | 15401   | 3.1  | 20.8700  | 2.4   | 0.1571 | 3.9   | 0.0238 | 3.1  | 0.80 | 151.5 | 4.7  | 148.1 | 5.4  | 95.1   | 56.1  | 151.5 | 4.7  |
| Chitstone-Spot 175 | 177  | 18562   | 3.3  | 21.3315  | 1.8   | 0.1541 | 3.3   | 0.0238 | 2.7  | 0.83 | 151.9 | 4.1  | 145.5 | 4.5  | 43.1   | 43.8  | 151.9 | 4.1  |
| Chitstone-Spot 246 | 242  | 13916   | 2.3  | 21.1709  | 1.9   | 0.1554 | 3.9   | 0.0239 | 3.5  | 0.88 | 152.1 | 5.2  | 146.7 | 5.4  | 61.1   | 45.3  | 152.1 | 5.2  |
| Chitstone-Spot 293 | 193  | 9556    | 19.1 | 21.5245  | 2.6   | 0.1528 | 4.1   | 0.0239 | 3.2  | 0.78 | 152.1 | 4.8  | 144.4 | 5.5  | 21.5   | 61.9  | 152.1 | 4.8  |
| Chitstone-Spot 3   | 438  | 130059  | 7.0  | 20.3825  | 1.6   | 0.1621 | 4.4   | 0.0240 | 4.1  | 0.93 | 152.7 | 6.2  | 152.6 | 6.3  | 150.8  | 37.0  | 152.7 | 6.2  |
| Chitstone-Spot 205 | 83   | 9763    | 6.5  | 21.2209  | 3.0   | 0.1568 | 4.2   | 0.0241 | 3.0  | 0.71 | 153.8 | 4.5  | 147.9 | 5.8  | 55.5   | 71.2  | 153.8 | 4.5  |
| Chitstone-Spot 134 | 212  | 10336   | 3.7  | 19.6606  | 2.5   | 0.1768 | 4.0   | 0.0252 | 3.2  | 0.78 | 160.5 | 5.0  | 165.3 | 6.1  | 234.7  | 57.6  | 160.5 | 5.0  |
| Chitstone-Spot 276 | 1686 | 18494   | 4.2  | 14.8653  | 2.6   | 0.3805 | 4.4   | 0.0410 | 3.5  | 0.80 | 259.3 | 9.0  | 327.4 | 12.4 | 846.2  | 54.9  | 259.3 | 9.0  |
| Chitstone-Spot 147 | 603  | 43598   | 4.4  | 19.0836  | 1.3   | 0.3271 | 2.9   | 0.0453 | 2.6  | 0.89 | 285.6 | 7.1  | 287.3 | 7.2  | 300.3  | 29.4  | 285.6 | 7.1  |
| Chitstone-Spot 151 | 485  | 48210   | 3.0  | 19.3546  | 1.5   | 0.3291 | 3.3   | 0.0462 | 3.0  | 0.89 | 291.2 | 8.4  | 288.9 | 8.4  | 270.7  | 34.7  | 291.2 | 8.4  |
| Chitstone-Spot 291 | 192  | 34199   | 2.6  | 19.3534  | 1.6   | 0.3298 | 3.6   | 0.0463 | 3.3  | 0.90 | 291.8 | 9.3  | 289.4 | 9.2  | 270.8  | 37.1  | 291.8 | 9.3  |
| Chitstone-Spot 231 | 1575 | 124492  | 3.1  | 18.7861  | 1.0   | 0.3401 | 2.8   | 0.0464 | 2.7  | 0.94 | 292.1 | 7.6  | 297.2 | 7.3  | 338.6  | 21.6  | 292.1 | 7.6  |
| Chitstone-Spot 155 | 691  | 153811  | 5.1  | 18.9923  | 1.2   | 0.3364 | 3.3   | 0.0464 | 3.0  | 0.93 | 292.1 | 8.7  | 294.4 | 8.4  | 313.9  | 28.3  | 292.1 | 8.7  |
| Chitstone-Spot 31  | 826  | 109999  | 2.7  | 19.1567  | 1.3   | 0.3345 | 3.4   | 0.0465 | 3.1  | 0.93 | 293.0 | 9.0  | 293.0 | 8.6  | 294.2  | 29.3  | 293.0 | 9.0  |
| Chitstone-Spot 290 | 292  | 140282  | 4.5  | 19.3912  | 1.6   | 0.3310 | 3.4   | 0.0466 | 3.0  | 0.88 | 293.4 | 8.7  | 290.3 | 8.7  | 266.4  | 37.5  | 293.4 | 8.7  |
| Chitstone-Spot 242 | 741  | 610650  | 3.8  | 18.9575  | 1.2   | 0.3393 | 3.3   | 0.0467 | 3.0  | 0.93 | 294.0 | 8.8  | 296.6 | 8.5  | 318.0  | 27.9  | 294.0 | 8.8  |
| Chitstone-Spot 98  | 344  | 125326  | 2.0  | 18.7805  | 1.6   | 0.3435 | 3.4   | 0.0468 | 3.0  | 0.88 | 294.9 | 8.7  | 299.8 | 8.9  | 339.3  | 36.5  | 294.9 | 8.7  |
| Chitstone-Spot 192 | 874  | 65987   | 3.6  | 19.8041  | 1.2   | 0.3260 | 2.9   | 0.0468 | 2.7  | 0.91 | 295.1 | 7.7  | 286.5 | 7.3  | 217.8  | 28.2  | 295.1 | 7.7  |
| Chitstone-Spot 96  | 895  | 151200  | 2.3  | 18.9559  | 1.1   | 0.3409 | 2.7   | 0.0469 | 2.5  | 0.92 | 295.4 | 7.3  | 297.9 | 7.1  | 318.2  | 25.1  | 295.4 | 7.3  |
| Chitstone-Spot 121 | 1107 | 75434   | 2.1  | 18.8509  | 1.3   | 0.3430 | 3.1   | 0.0469 | 2.8  | 0.90 | 295.6 | 8.0  | 299.5 | 7.9  | 330.9  | 30.1  | 295.6 | 8.0  |
| Chitstone-Spot 88  | 283  | 825119  | 3.0  | 18.9368  | 1.6   | 0.3419 | 2.8   | 0.0470 | 2.3  | 0.82 | 295.9 | 6.6  | 298.6 | 7.2  | 320.5  | 36.3  | 295.9 | 6.6  |
| Chitstone-Spot 200 | 741  | 109907  | 4.4  | 19.2103  | 1.2   | 0.3382 | 3.3   | 0.0471 | 3.0  | 0.93 | 297.0 | 8.8  | 295.8 | 8.4  | 287.9  | 28.2  | 297.0 | 8.8  |
| Chitstone-Spot 130 | 626  | 76622   | 3.3  | 18.7871  | 1.5   | 0.3485 | 3.6   | 0.0475 | 3.3  | 0.91 | 299.2 | 9.6  | 303.6 | 9.4  | 338.5  | 33.0  | 299.2 | 9.6  |
| Chitstone-Spot 181 | 266  | 236983  | 3.5  | 19.2965  | 1.4   | 0.3394 | 3.5   | 0.0475 | 3.2  | 0.91 | 299.3 | 9.3  | 296.7 | 8.9  | 277.6  | 32.1  | 299.3 | 9.3  |
| Chitstone-Spot 313 | 457  | 127091  | 3.2  | 19.1859  | 1.4   | 0.3417 | 3.7   | 0.0476 | 3.5  | 0.93 | 299.6 | 10.2 | 298.5 | 9.7  | 290.7  | 32.2  | 299.6 | 10.2 |
| Chitstone-Spot 221 | 262  | 139680  | 2.6  | 19.0215  | 1.4   | 0.3449 | 3.2   | 0.0476 | 2.9  | 0.90 | 299.8 | 8.5  | 300.9 | 8.5  | 310.4  | 32.7  | 299.8 | 8.5  |
| Chitstone-Spot 97  | 878  | 138568  | 2.3  | 18.9615  | 1.1   | 0.3460 | 2.9   | 0.0476 | 2.7  | 0.93 | 299.8 | 8.0  | 301.7 | 7.7  | 317.5  | 25.2  | 299.8 | 8.0  |
| Chitstone-Spot 309 | 490  | 588841  | 3.2  | 18.9583  | 1.4   | 0.3464 | 3.4   | 0.0476 | 3.1  | 0.91 | 300.0 | 9.2  | 302.0 | 8.9  | 317.9  | 32.0  | 300.0 | 9.2  |
| Chitstone-Spot 153 | 350  | 29192   | 3.6  | 19.5640  | 1.6   | 0.3367 | 3.4   | 0.0478 | 3.0  | 0.88 | 301.0 | 8.7  | 294.6 | 8.6  | 246.9  | 37.2  | 301.0 | 8.7  |
| Chitstone-Spot 184 | 75   | 16037   | 4.9  | 20.1093  | 2.6   | 0.3279 | 3.8   | 0.0478 | 2.7  | 0.72 | 301.2 | 8.0  | 287.9 | 9.5  | 182.3  | 60.6  | 301.2 | 8.0  |
| Chitstone-Spot 55  | 149  | 34091   | 2.4  | 18.8655  | 2.3   | 0.3495 | 3.6   | 0.0478 | 2.8  | 0.77 | 301.3 | 8.3  | 304.4 | 9.6  | 329.1  | 52.5  | 301.3 | 8.3  |
| Chitstone-Spot 203 | 217  | 134564  | 3.0  | 19.2459  | 1.8   | 0.3432 | 3.4   | 0.0479 | 2.9  | 0.85 | 301.8 | 8.6  | 299.6 | 8.9  | 283.6  | 40.9  | 301.8 | 8.6  |
| Chitstone-Spot 269 | 1258 | 644817  | 2.4  | 18.9061  | 1.1   | 0.3496 | 2.8   | 0.0480 | 2.6  | 0.92 | 302.0 | 7.5  | 304.4 | 7.3  | 324.2  | 24.2  | 302.0 | 7.5  |
| Chitstone-Spot 195 | 256  | 18714   | 3.4  | 19.2553  | 1.5   | 0.3433 | 3.6   | 0.0480 | 3.3  | 0.91 | 302.0 | 9.6  | 299.7 | 9.3  | 282.5  | 33.7  | 302.0 | 9.6  |
| Chitstone-Spot 78  | 385  | 57614   | 3.0  | 19.1669  | 1.2   | 0.3452 | 2.9   | 0.0480 | 2.6  | 0.90 | 302.3 | 7.7  | 301.1 | 7.5  | 293.0  | 28.4  | 302.3 | 7.7  |
| Chitstone-Spot 36  | 588  | 155686  | 3.1  | 19.1790  | 1.1   | 0.3452 | 2.5   | 0.0480 | 2.3  | 0.90 | 302.5 | 6.7  | 301.1 | 6.6  | 291.6  | 24.9  | 302.5 | 6.7  |
| Chitstone-Spot 18  | 281  | 193847  | 2.0  | 18.9990  | 1.4   | 0.3493 | 3.0   | 0.0482 | 2.6  | 0.88 | 303.2 | 7.7  | 304.2 | 7.8  | 313.1  | 32.5  | 303.2 | 7.7  |
| Chitstone-Spot 87  | 199  | 26600   | 4.4  | 19.4054  | 1.4   | 0.3424 | 3.0   | 0.0482 | 2.7  | 0.89 | 303.6 | 7.9  | 299.0 | 7.8  | 264.7  | 31.5  | 303.6 | 7.9  |
| Chitstone-Spot 7   | 455  | 81529   | 3.3  | 19.0180  | 1.0   | 0.3499 | 3.2   | 0.0483 | 3.0  | 0.95 | 304.0 | 9.0  | 304.7 | 8.5  | 310.8  | 23.7  | 304.0 | 9.0  |
| Chitstone-Spot 298 | 544  | 595110  | 3.8  | 18.9334  | 1.4   | 0.3518 | 3.4   | 0.0483 | 3.1  | 0.91 | 304.3 | 9.2  | 306.1 | 9.0  | 321.0  | 32.6  | 304.3 | 9.2  |
| Chitstone-Spot 141 | 457  | 1160099 | 4.4  | 19.0013  | 1.2   | 0.3512 | 2.7   | 0.0484 | 2.5  | 0.90 | 304.8 | 7.3  | 305.6 | 7.2  | 312.8  | 27.3  | 304.8 | 7.3  |
| Chitstone-Spot 76  | 184  | 10276   | 5.6  | 19.0479  | 1.9   | 0.3507 | 3.8   | 0.0485 | 3.3  | 0.87 | 305.1 | 9.9  | 305.2 | 10.0 | 307.2  | 42.7  | 305.1 | 9.9  |
| Chitstone-Spot 28  | 427  | 25422   | 4.6  | 18.7282  | 1.3   | 0.3580 | 2.8   | 0.0486 | 2.5  | 0.88 | 306.2 | 7.4  | 310.7 | 7.5  | 345.6  | 30.2  | 306.2 | 7.4  |
| Chitstone-Spot 47  | 1070 | 542935  | 2.7  | 18.7995  | 1.1   | 0.3569 | 2.8   | 0.0487 | 2.6  | 0.93 | 306.5 | 7.8  | 309.9 | 7.5  | 337.0  | 24.0  | 306.5 | 7.8  |
| Chitstone-Spot 166 | 173  | 70992   | 4.0  | 19.5258  | 1.9   | 0.3438 | 3.6   | 0.0487 | 3.0  | 0.84 | 306.6 | 9.0  | 300.0 | 9.3  | 250.5  | 44.3  | 306.6 | 9.0  |
| Chitstone-Spot 204 | 491  | 795968  | 3.0  | 19.3818  | 1.2   | 0.3469 | 3.7   | 0.0488 | 3.5  | 0.94 | 30    |      |       |      |        |       |       |      |

|                    |      |          |     |          |       |        |       |        |      |      |       |      |       |     |        |       |       |      |
|--------------------|------|----------|-----|----------|-------|--------|-------|--------|------|------|-------|------|-------|-----|--------|-------|-------|------|
| Chitstone-Spot 307 | 186  | 23658    | 6.5 | 19.0019  | 1.7   | 0.3589 | 3.2   | 0.0495 | 2.8  | 0.86 | 311.3 | 8.4  | 311.4 | 8.7 | 312.7  | 37.7  | 311.3 | 8.4  |
| Chitstone-Spot 218 | 178  | 46735    | 4.9 | 18.8019  | 1.4   | 0.3627 | 2.7   | 0.0495 | 2.3  | 0.86 | 311.3 | 7.1  | 314.2 | 7.3 | 336.7  | 31.0  | 311.3 | 7.1  |
| Chitstone-Spot 68  | 326  | 336671   | 5.0 | 19.2183  | 1.3   | 0.3549 | 3.3   | 0.0495 | 3.1  | 0.92 | 311.4 | 9.4  | 308.4 | 8.9 | 286.9  | 29.2  | 311.4 | 9.4  |
| Chitstone-Spot 72  | 244  | 30898    | 3.5 | 19.3538  | 1.8   | 0.3532 | 3.4   | 0.0496 | 2.9  | 0.85 | 312.1 | 8.9  | 307.1 | 9.1 | 270.8  | 40.9  | 312.1 | 8.9  |
| Chitstone-Spot 187 | 281  | 66613    | 4.3 | 19.2406  | 1.8   | 0.3554 | 3.5   | 0.0496 | 3.0  | 0.86 | 312.2 | 9.2  | 308.8 | 9.3 | 284.2  | 40.3  | 312.2 | 9.2  |
| Chitstone-Spot 85  | 307  | 78388    | 4.5 | 19.2619  | 1.4   | 0.3554 | 2.9   | 0.0497 | 2.5  | 0.86 | 312.5 | 7.6  | 308.8 | 7.7 | 281.7  | 33.1  | 312.5 | 7.6  |
| Chitstone-Spot 249 | 200  | 72295    | 5.8 | 18.7840  | 1.5   | 0.3656 | 3.1   | 0.0498 | 2.8  | 0.88 | 313.5 | 8.4  | 316.4 | 8.5 | 338.9  | 34.0  | 313.5 | 8.4  |
| Chitstone-Spot 256 | 88   | 13087    | 2.4 | 19.2646  | 1.7   | 0.3566 | 3.6   | 0.0499 | 3.2  | 0.88 | 313.6 | 9.6  | 309.7 | 9.6 | 281.4  | 39.7  | 313.6 | 9.6  |
| Chitstone-Spot 223 | 643  | 239441   | 4.4 | 18.9453  | 1.1   | 0.3628 | 2.8   | 0.0499 | 2.6  | 0.92 | 313.7 | 7.9  | 314.3 | 7.5 | 319.5  | 24.5  | 313.7 | 7.9  |
| Chitstone-Spot 41  | 547  | 143825   | 4.9 | 19.3526  | 1.4   | 0.3553 | 3.7   | 0.0499 | 3.4  | 0.93 | 313.8 | 10.4 | 308.7 | 9.7 | 270.9  | 31.6  | 313.8 | 10.4 |
| Chitstone-Spot 89  | 403  | 55267    | 3.1 | 18.9997  | 1.3   | 0.3619 | 2.9   | 0.0499 | 2.6  | 0.90 | 313.9 | 8.1  | 313.6 | 7.9 | 313.0  | 28.5  | 313.9 | 8.1  |
| Chitstone-Spot 286 | 253  | 56351    | 5.3 | 19.1174  | 1.3   | 0.3601 | 3.2   | 0.0499 | 3.0  | 0.91 | 314.2 | 9.1  | 312.3 | 8.7 | 298.9  | 29.8  | 314.2 | 9.1  |
| Chitstone-Spot 300 | 203  | 27675573 | 3.3 | 19.2255  | 1.3   | 0.3587 | 3.5   | 0.0500 | 3.2  | 0.92 | 314.7 | 9.9  | 311.2 | 9.3 | 286.0  | 30.8  | 314.7 | 9.9  |
| Chitstone-Spot 35  | 463  | 223503   | 3.3 | 19.5373  | 1.2   | 0.3533 | 3.3   | 0.0501 | 3.1  | 0.93 | 315.1 | 9.4  | 307.2 | 8.7 | 249.1  | 26.8  | 315.1 | 9.4  |
| Chitstone-Spot 255 | 357  | 43246    | 4.5 | 19.1409  | 1.3   | 0.3607 | 2.6   | 0.0501 | 2.3  | 0.87 | 315.1 | 7.0  | 312.7 | 7.1 | 296.1  | 29.8  | 315.1 | 7.0  |
| Chitstone-Spot 275 | 324  | 30089    | 1.4 | 19.5898  | 1.5   | 0.3532 | 2.7   | 0.0502 | 2.3  | 0.84 | 315.8 | 6.9  | 307.1 | 7.1 | 242.9  | 33.4  | 315.8 | 6.9  |
| Chitstone-Spot 230 | 270  | 23630    | 5.9 | 19.2732  | 1.5   | 0.3591 | 3.6   | 0.0502 | 3.3  | 0.91 | 315.9 | 10.2 | 311.6 | 9.8 | 280.4  | 35.3  | 315.9 | 10.2 |
| Chitstone-Spot 44  | 224  | 60195    | 4.6 | 19.3025  | 1.3   | 0.3586 | 3.5   | 0.0502 | 3.2  | 0.92 | 315.9 | 9.9  | 311.2 | 9.3 | 276.9  | 30.6  | 315.9 | 9.9  |
| Chitstone-Spot 244 | 275  | 157327   | 4.1 | 19.6720  | 1.4   | 0.3541 | 3.3   | 0.0505 | 3.0  | 0.90 | 317.8 | 9.3  | 307.8 | 8.8 | 233.3  | 33.1  | 317.8 | 9.3  |
| Chitstone-Spot 197 | 94   | 17725    | 2.9 | 18.4901  | 1.6   | 0.4077 | 3.0   | 0.0547 | 2.6  | 0.85 | 343.3 | 8.6  | 347.2 | 8.9 | 374.5  | 36.0  | 343.3 | 8.6  |
| Copper River       |      |          |     |          |       |        |       |        |      |      |       |      |       |     |        |       |       |      |
| Copper-Spot 55     | 181  | 20       | 1.4 | 2.0000   | 12.3  | 0.0011 | 23.9  | 0.0000 | 20.5 | 0.86 | 0.1   | 0.0  | 1.1   | 0.3 | NA     | NA    | 0.1   | 0.0  |
| Copper-Spot 244    | 148  | 20       | 1.0 | 2.0000   | 50.0  | 0.0012 | 52.2  | 0.0000 | 14.9 | 0.29 | 0.1   | 0.0  | 1.2   | 0.6 | NA     | NA    | 0.1   | 0.0  |
| Copper-Spot 165    | 184  | 20       | 2.1 | 2.0000   | 11.7  | 0.0013 | 24.2  | 0.0000 | 21.2 | 0.88 | 0.1   | 0.0  | 1.3   | 0.3 | NA     | NA    | 0.1   | 0.0  |
| Copper-Spot 313    | 669  | 20       | 1.5 | 2.0000   | 84.2  | 0.0013 | 84.5  | 0.0000 | 6.2  | 0.07 | 0.1   | 0.0  | 1.3   | 1.1 | NA     | NA    | 0.1   | 0.0  |
| Copper-Spot 159    | 155  | 20       | 2.7 | 2.0000   | 45.4  | 0.0013 | 49.5  | 0.0000 | 19.8 | 0.40 | 0.1   | 0.0  | 1.3   | 0.7 | NA     | NA    | 0.1   | 0.0  |
| Copper-Spot 157    | 256  | 20       | 1.4 | 2.0000   | 115.8 | 0.0014 | 116.3 | 0.0000 | 10.6 | 0.09 | 0.1   | 0.0  | 1.4   | 1.6 | NA     | NA    | 0.1   | 0.0  |
| Copper-Spot 112    | 187  | 20       | 1.7 | 2.0000   | 95.5  | 0.0014 | 96.6  | 0.0000 | 14.4 | 0.15 | 0.1   | 0.0  | 1.4   | 1.4 | NA     | NA    | 0.1   | 0.0  |
| Copper-Spot 300    | 189  | 20       | 2.1 | 2.0000   | 50.0  | 0.0014 | 52.0  | 0.0000 | 14.1 | 0.27 | 0.1   | 0.0  | 1.4   | 0.7 | NA     | NA    | 0.1   | 0.0  |
| Copper-Spot 47     | 171  | 20       | 3.2 | 2.0000   | 2.9   | 0.0014 | 15.7  | 0.0000 | 15.4 | 0.98 | 0.1   | 0.0  | 1.5   | 0.2 | NA     | NA    | 0.1   | 0.0  |
| Copper-Spot 21     | 149  | 20       | 1.3 | 2.0000   | 80.2  | 0.0014 | 82.0  | 0.0000 | 17.0 | 0.21 | 0.1   | 0.0  | 1.5   | 1.2 | NA     | NA    | 0.1   | 0.0  |
| Copper-Spot 223    | 218  | 20       | 3.4 | 2.0000   | 36.3  | 0.0015 | 38.9  | 0.0000 | 14.0 | 0.36 | 0.1   | 0.0  | 1.5   | 0.6 | NA     | NA    | 0.1   | 0.0  |
| Copper-Spot 172    | 121  | 20       | 1.9 | 2.0000   | 105.7 | 0.0015 | 107.3 | 0.0000 | 18.5 | 0.17 | 0.1   | 0.0  | 1.5   | 1.6 | NA     | NA    | 0.1   | 0.0  |
| Copper-Spot 206    | 109  | 20       | 4.3 | 2.0000   | 10.3  | 0.0015 | 20.6  | 0.0000 | 17.9 | 0.87 | 0.1   | 0.0  | 1.5   | 0.3 | NA     | NA    | 0.1   | 0.0  |
| Copper-Spot 74     | 98   | 20       | 2.6 | 2.0000   | 73.1  | 0.0015 | 75.7  | 0.0000 | 19.8 | 0.26 | 0.1   | 0.0  | 1.5   | 1.2 | NA     | NA    | 0.1   | 0.0  |
| Copper-Spot 286    | 126  | 20       | 1.2 | 2.0000   | 111.8 | 0.0015 | 112.7 | 0.0000 | 14.0 | 0.12 | 0.1   | 0.0  | 1.6   | 1.8 | NA     | NA    | 0.1   | 0.0  |
| Copper-Spot 184    | 130  | 20       | 1.7 | 2.0000   | 50.0  | 0.0016 | 52.4  | 0.0000 | 15.7 | 0.30 | 0.1   | 0.0  | 1.6   | 0.8 | NA     | NA    | 0.1   | 0.0  |
| Copper-Spot 99     | 146  | 20       | 1.6 | 2.0000   | 50.0  | 0.0016 | 51.6  | 0.0000 | 12.6 | 0.24 | 0.2   | 0.0  | 1.7   | 0.9 | NA     | NA    | 0.2   | 0.0  |
| Copper-Spot 301    | 235  | 20       | 1.5 | 2.0000   | 43.5  | 0.0016 | 44.4  | 0.0000 | 8.9  | 0.20 | 0.2   | 0.0  | 1.7   | 0.7 | NA     | NA    | 0.2   | 0.0  |
| Copper-Spot 234    | 79   | 20       | 2.2 | 2.0000   | 20.4  | 0.0016 | 30.0  | 0.0000 | 21.9 | 0.73 | 0.2   | 0.0  | 1.7   | 0.5 | NA     | NA    | 0.2   | 0.0  |
| Copper-Spot 214    | 269  | 20       | 2.3 | 2.0000   | 90.0  | 0.0017 | 90.5  | 0.0000 | 10.0 | 0.11 | 0.2   | 0.0  | 1.7   | 1.6 | NA     | NA    | 0.2   | 0.0  |
| Copper-Spot 8      | 134  | 20       | 2.2 | 2.0000   | 50.0  | 0.0017 | 52.3  | 0.0000 | 15.3 | 0.29 | 0.2   | 0.0  | 1.8   | 0.9 | NA     | NA    | 0.2   | 0.0  |
| Copper-Spot 229    | 93   | 20       | 1.9 | 2.0000   | 113.9 | 0.0018 | 114.7 | 0.0000 | 13.8 | 0.12 | 0.2   | 0.0  | 1.8   | 2.1 | NA     | NA    | 0.2   | 0.0  |
| Copper-Spot 30     | 123  | 20       | 2.6 | 2.0000   | 50.0  | 0.0020 | 51.5  | 0.0000 | 12.3 | 0.24 | 0.2   | 0.0  | 2.0   | 1.0 | NA     | NA    | 0.2   | 0.0  |
| Copper-Spot 261    | 337  | 20       | 1.9 | 2.0000   | 0.0   | 0.0020 | 6.5   | 0.0000 | 6.5  | 1.00 | 0.2   | 0.0  | 2.1   | 0.1 | NA     | NA    | 0.2   | 0.0  |
| Copper-Spot 256    | 105  | 20       | 1.9 | 2.0000   | 94.5  | 0.0024 | 95.3  | 0.0000 | 12.1 | 0.13 | 0.2   | 0.0  | 2.4   | 2.3 | NA     | NA    | 0.2   | 0.0  |
| Copper-Spot 280    | 730  | 20       | 1.1 | 2.0000   | 3.6   | 0.0029 | 23.6  | 0.0000 | 23.3 | 0.99 | 0.3   | 0.1  | 2.9   | 0.7 | NA     | NA    | 0.3   | 0.1  |
| Copper-Spot 296    | 183  | 20       | 2.2 | 2.0000   | 15.3  | 0.0037 | 39.6  | 0.0001 | 36.5 | 0.92 | 0.3   | 0.1  | 3.7   | 1.5 | NA     | NA    | 0.3   | 0.1  |
| Copper-Spot 188    | 102  | 20       | 2.5 | 2.0000   | 88.3  | 0.0043 | 88.7  | 0.0001 | 8.4  | 0.09 | 0.4   | 0.0  | 4.4   | 3.9 | NA     | NA    | 0.4   | 0.0  |
| Copper-Spot 131    | 1542 | 202      | 1.0 | 28.6369  | 17.7  | 0.0004 | 18.5  | 0.0001 | 5.5  | 0.30 | 0.6   | 0.0  | 0.4   | 0.1 | NA     | NA    | 0.6   | 0.0  |
| Copper-Spot 298    | 2373 | 268      | 1.0 | 25.4729  | 12.0  | 0.0005 | 12.8  | 0.0001 | 4.3  | 0.34 | 0.6   | 0.0  | 0.5   | 0.1 | NA     | NA    | 0.6   | 0.0  |
| Copper-Spot 93     | 112  | 92       | 1.4 | 2.4440   | 50.0  | 0.0050 | 53.5  | 0.0001 | 18.9 | 0.35 | 0.6   | 0.1  | 5.1   | 2.7 | NA     | NA    | 0.6   | 0.1  |
| Copper-Spot 179    | 1173 | 350      | 0.9 | 35.6891  | 78.7  | 0.0004 | 78.9  | 0.0001 | 5.1  | 0.06 | 0.7   | 0.0  | 0.4   | 0.3 | NA     | NA    | 0.7   | 0.0  |
| Copper-Spot 293    | 145  | 1223     | 2.3 | 29.1861  | 7.5   | 0.0005 | 17.6  | 0.0001 | 15.9 | 0.90 | 0.7   | 0.1  | 0.5   | 0.1 | NA     | NA    | 0.7   | 0.1  |
| Copper-Spot 266    | 291  | 560      | 1.6 | 28.8879  | 7.1   | 0.0005 | 15.3  | 0.0001 | 13.6 | 0.89 | 0.7   | 0.1  | 0.5   | 0.1 | NA     | NA    | 0.7   | 0.1  |
| Copper-Spot 66     | 359  | 267      | 1.1 | 61.2519  | 11.4  | 0.0003 | 15.1  | 0.0001 | 9.9  | 0.65 | 0.7   | 0.1  | 0.3   | 0.0 | NA     | NA    | 0.7   | 0.1  |
| Copper-Spot 101    | 136  | 208      | 2.3 | 38.9845  | 42.9  | 0.0004 | 45.9  | 0.0001 | 16.3 | 0.36 | 0.8   | 0.1  | 0.4   | 0.2 | NA     | NA    | 0.8   | 0.1  |
| Copper-Spot 130    | 127  | 152      | 1.3 | 12.8316  | 4.9   | 0.0014 | 19.9  | 0.0001 | 19.3 | 0.97 | 0.8   | 0.2  | 1.4   | 0.3 | NA     | NA    | 0.8   | 0.2  |
| Copper-Spot 198    | 149  | 89       | 1.2 | 2.4752   | 50.2  | 0.0075 | 51.9  | 0.0001 | 13.4 | 0.26 | 0.9   | 0.1  | 7.6   | 3.9 | NA     | NA    | 0.9   | 0.1  |
| Copper-Spot 59     | 137  | 84       | 2.6 | 25.3331  | 167.8 | 0.0008 | 168.3 | 0.0002 | 12.9 | 0.08 | 1.0   | 0.1  | 0.8   | 1.4 | NA     | NA    | 1.0   | 0.1  |
| Copper-Spot 208    | 568  | 230      | 1.8 | 20.8042  | 15.3  | 0.0010 | 16.5  | 0.0002 | 6.3  | 0.38 | 1.0   | 0.1  | 1.0   | 0.2 | 102.6  | 362.8 | 1.0   | 0.1  |
| Copper-Spot 257    | 406  | 91       | 2.5 | 48.5194  | 73.1  | 0.0004 | 73.5  | 0.0002 | 7.6  | 0.10 | 1.0   | 0.1  | 0.4   | 0.3 | NA     | NA    | 1.0   | 0.1  |
| Copper-Spot 235    | 152  | 101      | 1.9 | 61.7804  | 21.4  | 0.0003 | 25.6  | 0.0002 | 14.1 | 0.55 | 1.0   | 0.1  | 0.4   | 0.1 | NA     | NA    | 1.0   | 0.1  |
| Copper-Spot 272    | 146  | 151      | 1.6 | 58.7248  | 37.5  | 0.0004 | 40.2  | 0.0002 | 14.4 | 0.36 | 1.0   | 0.1  | 0.4   | 0.2 | NA     | NA    | 1.0   | 0.1  |
| Copper-Spot 128    | 1857 | 244      | 0.6 | 158.0339 | 194.8 | 0.0001 | 194.8 | 0.0002 | 3.6  | 0.02 | 1.0   | 0.0  | 0.1   | 0.3 | NA     | NA    | 1.0   | 0.0  |
| Copper-Spot 51     | 114  | 20       | 2.5 | 2.0000   | 8.0   | 0.0113 | 15.9  | 0.0002 | 13.8 | 0.86 | 1.1   | 0.1  | 11.4  | 1.8 | NA     | NA    | 1.1   | 0.1  |
| Copper-Spot 248    | 246  | 100      | 1.7 | 2.4104   | 51.0  | 0.0094 | 51.7  | 0.0002 | 8.6  | 0.17 | 1.1   | 0.1  | 9.5   | 4.9 | NA     | NA    | 1.1   | 0.1  |
| Copper-Spot 290    | 161  | 400      | 1.4 | 5.9856   | 20.9  | 0.0039 | 23.1  | 0.0002 | 9.9  | 0.43 | 1.1   | 0.1  | 4.0   | 0.9 | 2528.5 | 354.9 | 1.1   | 0.1  |
| Copper-Spot 237    | 76   | 1177     | 3.5 | 28.3359  | 4.5   | 0.0008 | 19.5  | 0.0002 | 19.0 | 0.97 | 1.1   | 0.2  | 0.9   | 0.2 | NA     | NA    | 1.1   | 0.2  |
| Copper-Spot 304    | 145  | 111      | 1.8 | 7.8077   | 4.3   | 0.0031 | 12.3  | 0.0002 | 11.5 | 0.94 | 1.1   | 0.1  | 3.1   | 0.4 | NA     | NA    | 1.1   | 0.1  |
| Copper-Spot 307    | 297  | 257      | 1.6 | 24.6746  | 27.5  | 0.0010 | 28.7  | 0.0002 | 8.0  | 0.28 | 1.2   | 0.1  | 1.0   | 0.3 | NA     | NA    | 1.2   | 0.1  |
| Copper             |      |          |     |          |       |        |       |        |      |      |       |      |       |     |        |       |       |      |

|                   |      |        |     |         |      |        |      |        |     |      |       |     |       |     |        |       |       |     |
|-------------------|------|--------|-----|---------|------|--------|------|--------|-----|------|-------|-----|-------|-----|--------|-------|-------|-----|
| Copper-Spot 67    | 183  | 14748  | 2.8 | 19.3164 | 1.9  | 0.1185 | 3.2  | 0.0166 | 2.6 | 0.81 | 106.2 | 2.8 | 113.7 | 3.5 | 275.2  | 43.4  | 106.2 | 2.8 |
| Copper-Spot 40    | 112  | 2505   | 3.7 | 21.9706 | 2.8  | 0.1117 | 4.4  | 0.0178 | 3.4 | 0.77 | 113.8 | 3.8 | 107.5 | 4.5 | NA     | NA    | 113.8 | 3.8 |
| Copper-Spot 90    | 317  | 2029   | 2.5 | 22.8984 | 1.8  | 0.1110 | 3.6  | 0.0184 | 3.2 | 0.87 | 117.8 | 3.7 | 106.9 | 3.7 | NA     | NA    | 117.8 | 3.7 |
| Copper-Spot 170   | 251  | 10627  | 3.1 | 19.8201 | 1.3  | 0.1387 | 2.7  | 0.0199 | 2.3 | 0.87 | 127.3 | 3.0 | 131.9 | 3.3 | 216.0  | 30.2  | 127.3 | 3.0 |
| Copper-Spot 81    | 82   | 10715  | 2.8 | 19.0494 | 2.6  | 0.1450 | 3.9  | 0.0200 | 3.0 | 0.76 | 128.0 | 3.8 | 137.5 | 5.1 | 307.0  | 58.5  | 128.0 | 3.8 |
| Copper-Spot 239   | 198  | 3375   | 2.5 | 21.9607 | 1.7  | 0.1273 | 2.8  | 0.0203 | 2.3 | 0.80 | 129.4 | 2.9 | 121.6 | 3.2 | NA     | NA    | 129.4 | 2.9 |
| Copper-Spot 97    | 462  | 16835  | 2.0 | 19.5594 | 1.3  | 0.1581 | 2.7  | 0.0224 | 2.3 | 0.87 | 143.1 | 3.3 | 149.1 | 3.7 | 246.5  | 30.2  | 143.1 | 3.3 |
| Copper-Spot 225   | 147  | 4474   | 4.1 | 19.9425 | 2.0  | 0.1571 | 3.7  | 0.0227 | 3.0 | 0.83 | 144.9 | 4.4 | 148.1 | 5.0 | 201.7  | 47.0  | 144.9 | 4.4 |
| Copper-Spot 58    | 79   | 1587   | 1.4 | 24.2662 | 3.8  | 0.1321 | 4.7  | 0.0233 | 2.8 | 0.60 | 148.2 | 4.2 | 126.0 | 5.6 | NA     | NA    | 148.2 | 4.2 |
| Copper-Spot 111   | 110  | 6886   | 1.3 | 20.4163 | 3.0  | 0.1606 | 4.3  | 0.0238 | 3.1 | 0.72 | 151.6 | 4.7 | 151.2 | 6.1 | 146.9  | 70.6  | 151.6 | 4.7 |
| Copper-Spot 78    | 785  | 46338  | 2.5 | 19.9037 | 1.0  | 0.1720 | 2.8  | 0.0248 | 2.6 | 0.93 | 158.2 | 4.1 | 161.1 | 4.1 | 206.2  | 22.9  | 158.2 | 4.1 |
| Copper-Spot 189   | 237  | 7719   | 3.1 | 19.6397 | 1.8  | 0.1812 | 3.4  | 0.0258 | 2.9 | 0.85 | 164.3 | 4.7 | 169.1 | 5.3 | 237.1  | 41.9  | 164.3 | 4.7 |
| Copper-Spot 310   | 733  | 89570  | 2.3 | 18.9060 | 1.2  | 0.3405 | 2.8  | 0.0467 | 2.5 | 0.91 | 294.3 | 7.2 | 297.6 | 7.1 | 324.2  | 26.5  | 294.3 | 7.2 |
| Copper-Spot 203   | 244  | 23481  | 1.5 | 18.3519 | 1.2  | 0.3531 | 2.6  | 0.0470 | 2.3 | 0.88 | 296.2 | 6.5 | 307.0 | 6.8 | 391.4  | 27.8  | 296.2 | 6.5 |
| Copper-Spot 39    | 310  | 36271  | 3.4 | 18.5086 | 1.4  | 0.3573 | 3.1  | 0.0480 | 2.7 | 0.89 | 302.2 | 8.0 | 310.2 | 8.2 | 372.2  | 31.7  | 302.2 | 8.0 |
| Copper-Spot 233   | 273  | 17800  | 1.3 | 18.6433 | 1.4  | 0.3574 | 3.4  | 0.0483 | 3.1 | 0.91 | 304.3 | 9.2 | 310.2 | 9.1 | 355.9  | 32.1  | 304.3 | 9.2 |
| Copper-Spot 187   | 407  | 117534 | 2.3 | 18.3383 | 1.3  | 0.3746 | 2.9  | 0.0498 | 2.6 | 0.89 | 313.6 | 7.8 | 323.0 | 8.0 | 393.0  | 29.7  | 313.6 | 7.8 |
| Dadina River      |      |        |     |         |      |        |      |        |     |      |       |     |       |     |        |       |       |     |
| Dadinaina-Spot 75 | 187  | 2071   | 1.5 | 8.7958  | 21.8 | 0.0029 | 23.7 | 0.0002 | 9.4 | 0.40 | 1.2   | 0.1 | 2.9   | 0.7 | 1859.2 | 398.2 | 1.2   | 0.1 |
| Dadina-Spot 66    | 362  | 4604   | 1.0 | 11.6359 | 18.3 | 0.0025 | 19.4 | 0.0002 | 6.3 | 0.33 | 1.4   | 0.1 | 2.6   | 0.5 | 1336.8 | 357.0 | 1.4   | 0.1 |
| Dadina-Spot 15    | 331  | 369    | 2.0 | 26.5232 | 27.3 | 0.0016 | 27.9 | 0.0003 | 5.6 | 0.20 | 2.0   | 0.1 | 1.6   | 0.5 | 506.1  | 738.2 | 2.0   | 0.1 |
| Dadina-Spot 72    | 1733 | 4110   | 0.5 | 20.1176 | 8.0  | 0.0022 | 8.3  | 0.0003 | 2.0 | 0.24 | 2.1   | 0.0 | 2.2   | 0.2 | 181.3  | 186.9 | 2.1   | 0.0 |
| Dadina-Spot 54    | 115  | 316    | 1.2 | 24.0334 | 15.1 | 0.0018 | 17.4 | 0.0003 | 8.6 | 0.50 | 2.1   | 0.2 | 1.9   | 0.3 | 250.1  | 383.4 | 2.1   | 0.2 |
| Dadina-Spot 68    | 167  | 44103  | 2.5 | 19.5234 | 3.7  | 0.1395 | 4.0  | 0.0198 | 1.4 | 0.35 | 126.1 | 1.7 | 132.6 | 5.0 | 250.7  | 86.3  | 126.1 | 1.7 |
| Dadina-Spot 4     | 194  | 22907  | 2.1 | 19.7625 | 2.7  | 0.1380 | 3.0  | 0.0198 | 1.4 | 0.45 | 126.3 | 1.7 | 131.3 | 3.7 | 222.7  | 62.5  | 126.3 | 1.7 |
| Dadina-Spot 110   | 137  | 10889  | 2.3 | 20.2262 | 3.7  | 0.1356 | 3.9  | 0.0199 | 1.3 | 0.34 | 126.9 | 1.7 | 129.1 | 4.7 | 168.8  | 85.5  | 126.9 | 1.7 |
| Dadina-Spot 90    | 358  | 30232  | 1.8 | 20.6230 | 2.5  | 0.1332 | 2.8  | 0.0199 | 1.4 | 0.49 | 127.1 | 1.8 | 126.9 | 3.4 | 123.2  | 58.1  | 127.1 | 1.8 |
| Dadina-Spot 109   | 113  | 13427  | 2.3 | 19.8487 | 4.8  | 0.1387 | 5.0  | 0.0200 | 1.6 | 0.32 | 127.5 | 2.0 | 131.9 | 6.2 | 212.6  | 110.2 | 127.5 | 2.0 |
| Dadina-Spot 17    | 131  | 10786  | 1.5 | 19.8340 | 3.1  | 0.1395 | 3.4  | 0.0201 | 1.5 | 0.44 | 128.1 | 1.9 | 132.6 | 4.3 | 214.3  | 71.6  | 128.1 | 1.9 |
| Dadina-Spot 84    | 294  | 31705  | 2.8 | 20.5206 | 2.5  | 0.1349 | 2.8  | 0.0201 | 1.1 | 0.39 | 128.1 | 1.4 | 128.5 | 3.3 | 134.9  | 59.8  | 128.1 | 1.4 |
| Dadina-Spot 74    | 180  | 29821  | 4.4 | 20.9853 | 3.2  | 0.1319 | 3.5  | 0.0201 | 1.4 | 0.41 | 128.1 | 1.8 | 125.8 | 4.1 | 82.0   | 74.9  | 128.1 | 1.8 |
| Dadina-Spot 86    | 105  | 31783  | 1.8 | 20.0643 | 4.7  | 0.1381 | 4.9  | 0.0201 | 1.4 | 0.28 | 128.3 | 1.8 | 131.3 | 6.1 | 187.5  | 110.5 | 128.3 | 1.8 |
| Dadina-Spot 28    | 97   | 33464  | 2.6 | 19.5047 | 3.1  | 0.1424 | 3.5  | 0.0201 | 1.5 | 0.44 | 128.6 | 1.9 | 135.2 | 4.4 | 253.0  | 71.5  | 128.6 | 1.9 |
| Dadina-Spot 108   | 209  | 34234  | 2.6 | 20.4712 | 2.7  | 0.1358 | 3.0  | 0.0202 | 1.4 | 0.45 | 128.7 | 1.7 | 129.3 | 3.6 | 140.6  | 62.8  | 128.7 | 1.7 |
| Dadina-Spot 95    | 185  | 9850   | 1.7 | 20.5994 | 3.2  | 0.1350 | 3.4  | 0.0202 | 1.1 | 0.33 | 128.7 | 1.5 | 128.6 | 4.1 | 125.9  | 76.0  | 128.7 | 1.5 |
| Dadina-Spot 33    | 136  | 19943  | 1.5 | 20.9462 | 3.3  | 0.1328 | 3.5  | 0.0202 | 1.4 | 0.39 | 128.8 | 1.8 | 126.6 | 4.2 | 86.5   | 77.2  | 128.8 | 1.8 |
| Dadina-Spot 92    | 73   | 11160  | 2.1 | 20.6216 | 4.3  | 0.1350 | 4.7  | 0.0202 | 1.9 | 0.40 | 128.8 | 2.4 | 128.6 | 5.6 | 123.4  | 100.4 | 128.8 | 2.4 |
| Dadina-Spot 97    | 131  | 104204 | 1.5 | 20.9672 | 3.8  | 0.1331 | 4.0  | 0.0202 | 1.3 | 0.31 | 129.1 | 1.6 | 126.9 | 4.8 | 84.1   | 91.1  | 129.1 | 1.6 |
| Dadina-Spot 77    | 87   | 50232  | 1.7 | 20.2963 | 4.7  | 0.1377 | 5.0  | 0.0203 | 1.5 | 0.30 | 129.4 | 1.9 | 131.0 | 6.1 | 160.7  | 110.5 | 129.4 | 1.9 |
| Dadina-Spot 87    | 143  | 32260  | 1.6 | 20.6949 | 3.6  | 0.1352 | 3.9  | 0.0203 | 1.5 | 0.38 | 129.5 | 1.9 | 128.8 | 4.8 | 115.0  | 85.8  | 129.5 | 1.9 |
| Dadina-Spot 39    | 77   | 27696  | 1.9 | 19.9169 | 4.9  | 0.1405 | 5.2  | 0.0203 | 1.9 | 0.37 | 129.5 | 2.5 | 133.5 | 6.8 | 204.7  | 113.0 | 129.5 | 2.5 |
| Dadina-Spot 70    | 165  | 16786  | 2.9 | 20.8399 | 3.6  | 0.1345 | 4.0  | 0.0203 | 1.7 | 0.41 | 129.7 | 2.1 | 128.1 | 4.8 | 98.5   | 86.3  | 129.7 | 2.1 |
| Dadina-Spot 27    | 94   | 4411   | 2.1 | 21.3523 | 4.1  | 0.1314 | 4.3  | 0.0203 | 1.3 | 0.29 | 129.9 | 1.6 | 125.3 | 5.0 | 40.8   | 97.3  | 129.9 | 1.6 |
| Dadina-Spot 24    | 99   | 13712  | 1.8 | 20.4650 | 4.6  | 0.1372 | 4.9  | 0.0204 | 1.6 | 0.32 | 130.0 | 2.0 | 130.6 | 6.0 | 141.3  | 108.5 | 130.0 | 2.0 |
| Dadina-Spot 85    | 97   | 10768  | 1.7 | 20.5013 | 3.3  | 0.1370 | 3.7  | 0.0204 | 1.5 | 0.40 | 130.0 | 1.9 | 130.4 | 4.5 | 137.2  | 78.6  | 130.0 | 1.9 |
| Dadina-Spot 25    | 143  | 18685  | 1.6 | 20.2894 | 2.9  | 0.1386 | 3.2  | 0.0204 | 1.3 | 0.42 | 130.1 | 1.7 | 131.8 | 3.9 | 161.5  | 67.7  | 130.1 | 1.7 |
| Dadina-Spot 41    | 109  | 6591   | 3.2 | 21.2785 | 4.5  | 0.1322 | 4.7  | 0.0204 | 1.2 | 0.25 | 130.2 | 1.5 | 126.1 | 5.6 | 49.0   | 108.4 | 130.2 | 1.5 |
| Dadina-Spot 107   | 91   | 12426  | 2.2 | 20.0715 | 5.1  | 0.1402 | 5.3  | 0.0204 | 1.5 | 0.28 | 130.2 | 1.9 | 133.2 | 6.7 | 186.7  | 119.3 | 130.2 | 1.9 |
| Dadina-Spot 62    | 87   | 10744  | 1.9 | 20.2527 | 4.4  | 0.1389 | 4.6  | 0.0204 | 1.5 | 0.33 | 130.2 | 2.0 | 132.1 | 5.7 | 165.7  | 102.4 | 130.2 | 2.0 |
| Dadina-Spot 47    | 349  | 131135 | 2.7 | 20.1359 | 2.1  | 0.1399 | 2.4  | 0.0204 | 1.2 | 0.49 | 130.3 | 1.5 | 132.9 | 3.0 | 179.2  | 49.3  | 130.3 | 1.5 |
| Dadina-Spot 32    | 154  | 188918 | 2.2 | 19.6370 | 4.4  | 0.1434 | 4.6  | 0.0204 | 1.5 | 0.32 | 130.4 | 1.9 | 136.1 | 5.9 | 237.4  | 100.5 | 130.4 | 1.9 |
| Dadina-Spot 94    | 112  | 10796  | 2.3 | 20.8214 | 4.3  | 0.1353 | 4.5  | 0.0204 | 1.3 | 0.29 | 130.4 | 1.7 | 128.9 | 5.5 | 100.6  | 102.1 | 130.4 | 1.7 |
| Dadina-Spot 63    | 192  | 42598  | 3.0 | 20.9396 | 3.0  | 0.1346 | 3.2  | 0.0204 | 1.1 | 0.36 | 130.4 | 1.5 | 128.2 | 3.8 | 87.2   | 70.4  | 130.4 | 1.5 |
| Dadina-Spot 29    | 146  | 116414 | 2.1 | 20.1149 | 4.6  | 0.1402 | 4.9  | 0.0205 | 1.4 | 0.29 | 130.6 | 1.8 | 133.3 | 6.1 | 181.6  | 108.1 | 130.6 | 1.8 |
| Dadina-Spot 9     | 136  | 17068  | 1.6 | 20.9726 | 3.2  | 0.1345 | 3.4  | 0.0205 | 1.3 | 0.38 | 130.6 | 1.7 | 128.2 | 4.1 | 83.5   | 75.1  | 130.6 | 1.7 |
| Dadina-Spot 98    | 72   | 25068  | 2.2 | 20.0606 | 5.4  | 0.1407 | 5.7  | 0.0205 | 1.7 | 0.30 | 130.7 | 2.2 | 133.7 | 7.1 | 187.9  | 126.4 | 130.7 | 2.2 |
| Dadina-Spot 83    | 98   | 13140  | 1.6 | 19.7948 | 3.8  | 0.1427 | 4.1  | 0.0205 | 1.6 | 0.38 | 130.7 | 2.0 | 135.4 | 5.2 | 218.9  | 88.6  | 130.7 | 2.0 |
| Dadina-Spot 13    | 99   | 30084  | 1.7 | 20.0888 | 3.8  | 0.1408 | 4.1  | 0.0205 | 1.5 | 0.38 | 130.9 | 2.0 | 133.8 | 5.1 | 184.7  | 87.8  | 130.9 | 2.0 |
| Dadina-Spot 58    | 72   | 4668   | 2.0 | 20.0910 | 5.5  | 0.1409 | 5.7  | 0.0205 | 1.5 | 0.26 | 131.0 | 2.0 | 133.8 | 7.2 | 184.4  | 128.6 | 131.0 | 2.0 |
| Dadina-Spot 40    | 134  | 31810  | 1.2 | 20.4552 | 2.8  | 0.1385 | 3.0  | 0.0205 | 1.1 | 0.35 | 131.1 | 1.4 | 131.7 | 3.7 | 142.4  | 66.5  | 131.1 | 1.4 |
| Dadina-Spot 31    | 114  | 10644  | 1.5 | 21.2798 | 4.5  | 0.1332 | 4.6  | 0.0206 | 1.2 | 0.26 | 131.2 | 1.5 | 126.9 | 5.5 | 48.8   | 106.5 | 131.2 | 1.5 |
| Dadina-Spot 93    | 287  | 108274 | 2.5 | 19.8841 | 2.4  | 0.1426 | 2.8  | 0.0206 | 1.4 | 0.51 | 131.2 | 1.8 | 135.4 | 3.5 | 208.5  | 54.8  | 131.2 | 1.8 |
| Dadina-Spot 76    | 81   | 9774   | 2.6 | 20.9502 | 4.8  | 0.1355 | 4.9  | 0.0206 | 1.1 | 0.21 | 131.3 | 1.4 | 129.0 | 6.0 | 86.0   | 114.6 | 131.3 | 1.4 |
| Dadina-Spot 34    | 91   | 14142  | 2.2 | 19.5572 | 3.5  | 0.1453 | 4.0  | 0.0206 | 2.0 | 0.49 | 131.5 | 2.6 | 137.7 | 5.2 | 246.8  | 80.8  | 131.5 | 2.6 |
| Dadina-Spot 5     | 184  | 102329 | 1.4 | 20.2009 | 2.9  | 0.1407 | 3.1  | 0.0206 | 1.2 | 0.37 | 131.5 | 1.5 | 133.7 | 3.9 | 171.7  | 68.1  | 131.5 | 1.5 |
| Dadina-Spot 37    | 131  | 27691  | 2.0 | 20.1101 | 4.0  | 0.1417 | 4.2  | 0.0207 | 1.4 | 0.32 | 131.9 | 1.8 | 134.6 | 5.3 | 182.2  | 93.1  | 131.9 | 1.8 |
| Dadina-Spot 43    | 184  | 60118  | 4.1 | 20.6434 | 3.2  | 0.1382 | 3.6  | 0.0207 | 1.5 | 0.43 | 132.0 | 2.0 | 131.4 | 4.4 | 120.9  | 76.5  | 132.0 | 2.0 |
| Dadina-Spot 16    | 135  | 60386  | 1.3 | 20.2675 | 3.4  | 0.1412 | 3.7  | 0.0207 | 1.6 | 0.42 | 132.4 | 2.1 | 134.1 | 4.7 | 164.0  | 78.6  | 132.4 | 2.1 |
| Dadina-Spot 36    | 146  | 34575  | 3.0 | 20.7500 | 3.4  | 0.1379 | 3.8  | 0.     |     |      |       |     |       |     |        |       |       |     |

|                 |       |        |     |          |        |        |        |        |     |      |       |     |       |      |        |       |       |     |
|-----------------|-------|--------|-----|----------|--------|--------|--------|--------|-----|------|-------|-----|-------|------|--------|-------|-------|-----|
| Dadina-Spot 102 | 153   | 13780  | 4.7 | 20.1264  | 2.8    | 0.1539 | 3.2    | 0.0225 | 1.6 | 0.51 | 143.2 | 2.3 | 145.3 | 4.4  | 180.3  | 64.5  | 143.2 | 2.3 |
| Dadina-Spot 91  | 338   | 29406  | 2.4 | 20.5084  | 2.3    | 0.1513 | 2.6    | 0.0225 | 1.2 | 0.48 | 143.4 | 1.8 | 143.0 | 3.5  | 136.3  | 53.4  | 143.4 | 1.8 |
| Dadina-Spot 105 | 144   | 14385  | 4.1 | 20.4620  | 3.8    | 0.1530 | 4.2    | 0.0227 | 1.9 | 0.45 | 144.7 | 2.7 | 144.5 | 5.7  | 141.7  | 88.1  | 144.7 | 2.7 |
| Dadina-Spot 21  | 85    | 3063   | 2.6 | 7.7728   | 20.7   | 0.4030 | 21.2   | 0.0227 | 4.5 | 0.21 | 144.8 | 6.4 | 343.8 | 61.9 | 2079.6 | 369.1 | 144.8 | 6.4 |
| Dadina-Spot 22  | 245   | 17340  | 3.7 | 20.6563  | 2.5    | 0.1528 | 2.9    | 0.0229 | 1.4 | 0.48 | 145.9 | 2.0 | 144.4 | 3.9  | 119.4  | 59.0  | 145.9 | 2.0 |
| Dadina-Spot 35  | 93    | 44683  | 3.4 | 19.8997  | 3.7    | 0.1589 | 4.1    | 0.0229 | 1.7 | 0.42 | 146.2 | 2.5 | 149.7 | 5.7  | 206.7  | 85.6  | 146.2 | 2.5 |
| Dadina-Spot 30  | 186   | 46848  | 2.2 | 19.6790  | 2.4    | 0.1614 | 2.8    | 0.0230 | 1.4 | 0.51 | 146.8 | 2.1 | 151.9 | 3.9  | 232.5  | 55.1  | 146.8 | 2.1 |
| Dadina-Spot 23  | 304   | 136252 | 1.8 | 19.8973  | 2.5    | 0.1602 | 2.7    | 0.0231 | 1.0 | 0.39 | 147.4 | 1.5 | 150.9 | 3.8  | 207.0  | 58.3  | 147.4 | 1.5 |
| Dadina-Spot 81  | 133   | 10077  | 3.9 | 20.9394  | 3.5    | 0.1526 | 3.8    | 0.0232 | 1.4 | 0.36 | 147.7 | 2.0 | 144.2 | 5.1  | 87.3   | 83.1  | 147.7 | 2.0 |
| Dadina-Spot 104 | 210   | 14364  | 3.1 | 19.9560  | 2.5    | 0.1603 | 2.8    | 0.0232 | 1.3 | 0.47 | 147.8 | 1.9 | 150.9 | 4.0  | 200.1  | 58.0  | 147.8 | 1.9 |
| Dadina-Spot 73  | 141   | 35148  | 3.8 | 20.1365  | 3.1    | 0.1592 | 3.3    | 0.0233 | 1.2 | 0.35 | 148.2 | 1.7 | 150.0 | 4.6  | 179.1  | 72.7  | 148.2 | 1.7 |
| Dadina-Spot 8   | 368   | 51673  | 2.2 | 19.8635  | 1.8    | 0.1661 | 2.4    | 0.0239 | 1.6 | 0.66 | 152.5 | 2.4 | 156.0 | 3.5  | 210.9  | 42.3  | 152.5 | 2.4 |
| Dadina-Spot 78  | 124   | 24453  | 4.2 | 18.0625  | 3.5    | 0.1899 | 3.9    | 0.0249 | 1.6 | 0.41 | 158.4 | 2.5 | 176.5 | 6.3  | 426.9  | 78.6  | 158.4 | 2.5 |
| Dadina-Spot 45  | 576   | 37324  | 9.7 | 19.9837  | 1.7    | 0.1760 | 2.1    | 0.0255 | 1.1 | 0.56 | 162.4 | 1.8 | 164.6 | 3.1  | 196.9  | 39.7  | 162.4 | 1.8 |
| Dadina-Spot 50  | 256   | 43516  | 3.7 | 19.0598  | 1.8    | 0.3313 | 2.2    | 0.0458 | 1.1 | 0.53 | 288.7 | 3.2 | 290.5 | 5.5  | 305.8  | 41.7  | 288.7 | 3.2 |
| Dadina-Spot 55  | 424   | 57362  | 2.2 | 19.0727  | 1.4    | 0.3410 | 1.7    | 0.0472 | 0.9 | 0.56 | 297.1 | 2.7 | 297.9 | 4.3  | 304.3  | 31.2  | 297.1 | 2.7 |
| Dadina-Spot 14  | 511   | 45765  | 3.7 | 19.1001  | 1.1    | 0.3493 | 1.4    | 0.0484 | 1.0 | 0.68 | 304.6 | 2.9 | 304.2 | 3.8  | 301.0  | 24.0  | 304.6 | 2.9 |
| Dadina-Spot 38  | 540   | 109008 | 2.9 | 18.9881  | 1.4    | 0.3531 | 1.9    | 0.0486 | 1.3 | 0.70 | 306.1 | 4.0 | 307.0 | 5.1  | 314.4  | 31.3  | 306.1 | 4.0 |
| Dadina-Spot 20  | 457   | 30823  | 3.1 | 18.8898  | 1.4    | 0.3569 | 1.6    | 0.0489 | 0.9 | 0.55 | 307.8 | 2.7 | 309.9 | 4.4  | 326.2  | 31.2  | 307.8 | 2.7 |
| Dadina-Spot 42  | 186   | 41890  | 3.7 | 18.5405  | 2.4    | 0.3704 | 2.6    | 0.0498 | 1.0 | 0.38 | 313.4 | 3.0 | 320.0 | 7.1  | 368.4  | 54.2  | 313.4 | 3.0 |
| Donjek River    |       |        |     |          |        |        |        |        |     |      |       |     |       |      |        |       |       |     |
| Donjek-Spot 234 | 637   | 1935   | 2.5 | 25.3798  | 7.3    | 0.0071 | 7.6    | 0.0013 | 2.0 | 0.26 | 8.4   | 0.2 | 7.2   | 0.5  | NA     | NA    | 8.4   | 0.2 |
| Donjek-Spot 26  | 334   | 1120   | 3.2 | 29.5382  | 10.5   | 0.0062 | 10.8   | 0.0013 | 2.3 | 0.22 | 8.6   | 0.2 | 6.3   | 0.7  | NA     | NA    | 8.6   | 0.2 |
| Donjek-Spot 251 | 680   | 960    | 1.4 | 28.5395  | 10.2   | 0.0065 | 10.3   | 0.0013 | 1.5 | 0.14 | 8.6   | 0.1 | 6.5   | 0.7  | NA     | NA    | 8.6   | 0.1 |
| Donjek-Spot 13  | 2789  | 10090  | 3.2 | 22.1868  | 1.8    | 0.0083 | 2.0    | 0.0013 | 0.9 | 0.47 | 8.6   | 0.1 | 8.4   | 0.2  | NA     | NA    | 8.6   | 0.1 |
| Donjek-Spot 291 | 386   | 1485   | 3.5 | 24.1552  | 5.3    | 0.0077 | 5.7    | 0.0014 | 1.9 | 0.34 | 8.7   | 0.2 | 7.8   | 0.4  | NA     | NA    | 8.7   | 0.2 |
| Donjek-Spot 203 | 540   | 1053   | 1.9 | 27.2385  | 19.8   | 0.0069 | 19.9   | 0.0014 | 1.8 | 0.09 | 8.8   | 0.2 | 7.0   | 1.4  | NA     | NA    | 8.8   | 0.2 |
| Donjek-Spot 275 | 166   | 277    | 3.4 | 413.8471 | 1052.0 | 0.0005 | 1052.0 | 0.0014 | 2.7 | 0.00 | 8.8   | 0.2 | 0.5   | 4.9  | NA     | NA    | 8.8   | 0.2 |
| Donjek-Spot 5   | 435   | 1737   | 1.9 | 24.3554  | 4.0    | 0.0078 | 4.5    | 0.0014 | 2.0 | 0.45 | 8.9   | 0.2 | 7.9   | 0.4  | NA     | NA    | 8.9   | 0.2 |
| Donjek-Spot 267 | 91    | 406    | 4.5 | 83.4853  | 82.7   | 0.0023 | 82.7   | 0.0014 | 2.8 | 0.03 | 9.0   | 0.2 | 2.3   | 1.9  | NA     | NA    | 9.0   | 0.2 |
| Donjek-Spot 38  | 156   | 740    | 3.3 | 51.8150  | 27.7   | 0.0037 | 27.8   | 0.0014 | 2.5 | 0.09 | 9.0   | 0.2 | 3.8   | 1.0  | NA     | NA    | 9.0   | 0.2 |
| Donjek-Spot 186 | 210   | 850    | 4.0 | 32.4298  | 18.7   | 0.0060 | 18.8   | 0.0014 | 2.3 | 0.12 | 9.1   | 0.2 | 6.1   | 1.1  | NA     | NA    | 9.1   | 0.2 |
| Donjek-Spot 77  | 276   | 1214   | 3.0 | 23.6632  | 14.2   | 0.0083 | 14.3   | 0.0014 | 1.7 | 0.12 | 9.2   | 0.2 | 8.4   | 1.2  | NA     | NA    | 9.2   | 0.2 |
| Donjek-Spot 237 | 351   | 9171   | 4.1 | 20.2228  | 4.6    | 0.0097 | 5.0    | 0.0014 | 2.0 | 0.40 | 9.2   | 0.2 | 9.8   | 0.5  | 168.1  | 106.8 | 9.2   | 0.2 |
| Donjek-Spot 130 | 445   | 6414   | 2.4 | 21.8876  | 3.7    | 0.0090 | 4.1    | 0.0014 | 1.7 | 0.41 | 9.2   | 0.2 | 9.1   | 0.4  | NA     | NA    | 9.2   | 0.2 |
| Donjek-Spot 125 | 336   | 3001   | 2.3 | 21.3946  | 3.8    | 0.0093 | 4.2    | 0.0014 | 1.8 | 0.42 | 9.3   | 0.2 | 9.4   | 0.4  | 35.0   | 91.7  | 9.3   | 0.2 |
| Donjek-Spot 44  | 941   | 3082   | 2.0 | 19.7841  | 3.4    | 0.0103 | 3.6    | 0.0015 | 1.2 | 0.33 | 9.6   | 0.1 | 10.5  | 0.4  | 219.2  | 78.7  | 9.6   | 0.1 |
| Donjek-Spot 27  | 190   | 596    | 3.5 | 41.4447  | 29.0   | 0.0050 | 29.1   | 0.0015 | 2.0 | 0.07 | 9.7   | 0.2 | 5.1   | 1.5  | NA     | NA    | 9.7   | 0.2 |
| Donjek-Spot 109 | 146   | 859    | 3.7 | 33.7617  | 5.3    | 0.0061 | 5.6    | 0.0015 | 1.8 | 0.32 | 9.7   | 0.2 | 6.2   | 0.3  | NA     | NA    | 9.7   | 0.2 |
| Donjek-Spot 204 | 227   | 316    | 7.1 | 132.8473 | 342.5  | 0.0016 | 342.5  | 0.0016 | 1.8 | 0.01 | 10.1  | 0.2 | 1.6   | 5.6  | NA     | NA    | 10.1  | 0.2 |
| Donjek-Spot 45  | 112   | 477    | 2.3 | 50.2761  | 18.2   | 0.0062 | 18.3   | 0.0023 | 2.3 | 0.13 | 14.6  | 0.3 | 6.3   | 1.2  | NA     | NA    | 14.6  | 0.3 |
| Donjek-Spot 197 | 299   | 4632   | 2.7 | 19.9203  | 3.7    | 0.0170 | 3.9    | 0.0025 | 1.3 | 0.33 | 15.8  | 0.2 | 17.1  | 0.7  | 203.3  | 86.5  | 15.8  | 0.2 |
| Donjek-Spot 19  | 9129  | 10312  | 0.2 | 16.8293  | 0.7    | 0.0605 | 2.3    | 0.0074 | 2.2 | 0.95 | 47.4  | 1.0 | 59.6  | 1.3  | 581.6  | 15.4  | 47.4  | 1.0 |
| Donjek-Spot 240 | 553   | 45210  | 4.2 | 21.0271  | 1.9    | 0.0552 | 2.3    | 0.0084 | 1.4 | 0.58 | 54.1  | 0.7 | 54.6  | 1.2  | 76.3   | 45.3  | 54.1  | 0.7 |
| Donjek-Spot 259 | 889   | 36705  | 1.6 | 21.9071  | 1.3    | 0.0597 | 1.9    | 0.0095 | 1.3 | 0.71 | 60.8  | 0.8 | 58.8  | 1.1  | NA     | NA    | 60.8  | 0.8 |
| Donjek-Spot 103 | 613   | 10330  | 2.9 | 21.6150  | 2.0    | 0.0616 | 2.3    | 0.0097 | 1.2 | 0.51 | 62.0  | 0.7 | 60.7  | 1.4  | 10.4   | 48.5  | 62.0  | 0.7 |
| Donjek-Spot 72  | 155   | 15484  | 2.9 | 22.0240  | 2.4    | 0.0641 | 2.6    | 0.0102 | 1.0 | 0.39 | 65.7  | 0.7 | 63.1  | 1.6  | NA     | NA    | 65.7  | 0.7 |
| Donjek-Spot 231 | 495   | 8479   | 4.3 | 21.6479  | 1.8    | 0.0676 | 2.3    | 0.0106 | 1.4 | 0.64 | 68.1  | 1.0 | 66.4  | 1.5  | 6.7    | 42.3  | 68.1  | 1.0 |
| Donjek-Spot 48  | 208   | 18548  | 3.8 | 20.9886  | 2.1    | 0.0732 | 2.4    | 0.0111 | 1.1 | 0.45 | 71.4  | 0.8 | 71.7  | 1.7  | 80.6   | 50.6  | 71.4  | 0.8 |
| Donjek-Spot 173 | 378   | 12952  | 4.4 | 21.5834  | 1.5    | 0.0724 | 2.0    | 0.0113 | 1.3 | 0.65 | 72.7  | 0.9 | 71.0  | 1.4  | 13.9   | 36.1  | 72.7  | 0.9 |
| Donjek-Spot 2   | 16730 | 21317  | 0.0 | 17.2966  | 0.9    | 0.0923 | 1.7    | 0.0116 | 1.4 | 0.84 | 74.2  | 1.0 | 89.6  | 1.4  | 521.8  | 19.9  | 74.2  | 1.0 |
| Donjek-Spot 18  | 63    | 9059   | 3.5 | 18.7166  | 2.9    | 0.1007 | 3.2    | 0.0137 | 1.3 | 0.41 | 87.5  | 1.2 | 97.4  | 3.0  | 346.1  | 66.0  | 87.5  | 1.2 |
| Donjek-Spot 94  | 1776  | 43640  | 5.0 | 19.3647  | 0.8    | 0.1489 | 1.4    | 0.0209 | 1.2 | 0.82 | 133.5 | 1.6 | 141.0 | 1.9  | 268.5  | 18.9  | 133.5 | 1.6 |
| Donjek-Spot 272 | 1288  | 61723  | 0.8 | 20.2944  | 0.9    | 0.1535 | 1.6    | 0.0226 | 1.3 | 0.83 | 144.1 | 1.9 | 145.0 | 2.1  | 159.9  | 20.8  | 144.1 | 1.9 |
| Donjek-Spot 57  | 625   | 52367  | 3.2 | 20.1464  | 1.1    | 0.1547 | 1.9    | 0.0226 | 1.5 | 0.80 | 144.2 | 2.1 | 146.1 | 2.5  | 177.0  | 26.0  | 144.2 | 2.1 |
| Donjek-Spot 78  | 652   | 38280  | 3.6 | 20.4044  | 0.9    | 0.1537 | 1.6    | 0.0228 | 1.2 | 0.79 | 145.1 | 1.8 | 145.2 | 2.1  | 147.2  | 22.3  | 145.1 | 1.8 |
| Donjek-Spot 144 | 505   | 33989  | 2.2 | 20.4016  | 1.0    | 0.1548 | 1.7    | 0.0229 | 1.4 | 0.81 | 146.1 | 2.0 | 146.2 | 2.3  | 147.6  | 22.9  | 146.1 | 2.0 |
| Donjek-Spot 68  | 652   | 60686  | 2.6 | 20.2840  | 1.1    | 0.1562 | 1.9    | 0.0230 | 1.5 | 0.82 | 146.5 | 2.2 | 147.3 | 2.5  | 161.1  | 25.1  | 146.5 | 2.2 |
| Donjek-Spot 115 | 711   | 12320  | 3.3 | 18.1171  | 2.3    | 0.1750 | 2.7    | 0.0230 | 1.5 | 0.54 | 146.6 | 2.1 | 163.7 | 4.1  | 419.2  | 50.5  | 146.6 | 2.1 |
| Donjek-Spot 264 | 1023  | 28797  | 2.6 | 20.5271  | 0.7    | 0.1544 | 1.3    | 0.0230 | 1.1 | 0.86 | 146.6 | 1.6 | 145.8 | 1.7  | 133.2  | 15.4  | 146.6 | 1.6 |
| Donjek-Spot 215 | 1610  | 38294  | 1.1 | 17.6665  | 0.8    | 0.1797 | 3.2    | 0.0230 | 3.1 | 0.97 | 146.8 | 4.5 | 167.8 | 4.9  | 475.2  | 16.8  | 146.8 | 4.5 |
| Donjek-Spot 90  | 2000  | 41212  | 2.6 | 20.5717  | 1.0    | 0.1544 | 1.7    | 0.0230 | 1.4 | 0.83 | 146.9 | 2.1 | 145.8 | 2.3  | 128.1  | 22.6  | 146.9 | 2.1 |
| Donjek-Spot 278 | 1267  | 144916 | 2.1 | 20.3549  | 0.8    | 0.1564 | 1.7    | 0.0231 | 1.5 | 0.86 | 147.2 | 2.1 | 147.6 | 2.3  | 153.0  | 19.8  | 147.2 | 2.1 |
| Donjek-Spot 29  | 2015  | 435569 | 1.7 | 20.2318  | 0.7    | 0.1595 | 1.4    | 0.0234 | 1.2 | 0.85 | 149.2 | 1.8 | 150.3 | 2.0  | 167.1  | 17.3  | 149.2 | 1.8 |
| Donjek-Spot 85  | 2909  | 24111  | 1.2 | 18.1894  | 0.6    | 0.1978 | 2.6    | 0.0261 | 2.6 | 0.97 | 166.1 | 4.2 | 183.2 | 4.4  | 410.3  | 14.5  | 166.1 | 4.2 |
| Donjek-Spot 84  | 280   | 41384  | 3.0 | 20.6157  | 0.9    | 0.1965 | 1.3    | 0.0294 | 0.9 | 0.72 | 186.7 | 1.7 | 182.1 | 2.2  | 123.0  | 21.1  | 186.7 | 1.7 |
| Donjek-Spot 253 | 3653  | 39857  | 1.7 | 18.4794  | 0.6    | 0.2788 | 1.6    | 0.0374 | 1.5 | 0.92 | 236.6 | 3.4 | 249.7 | 3.6  | 374.8  | 14.6  | 236.6 | 3.4 |
| Donjek-Spot 9   | 15700 | 100244 | 0.0 | 17.9355  | 0.7    | 0.2914 | 1.8    | 0.0379 | 1.6 | 0.93 | 240.0 | 3.8 | 259.7 | 4.0  | 441.7  | 14.7  | 240.0 | 3.8 |
| Donjek-Spot 281 | 2712  | 40055  | 2.1 | 18.0940  | 0.8    | 0.2992 | 1.5    | 0.0393 | 1.3 | 0.85 | 248.4 | 3.1 | 285.8 | 3.5  | 422.0  | 18.0  | 248.4 |     |

|                 |      |         |      |         |     |        |     |        |     |      |       |     |       |     |       |      |       |     |
|-----------------|------|---------|------|---------|-----|--------|-----|--------|-----|------|-------|-----|-------|-----|-------|------|-------|-----|
| Donjek-Spot 8   | 282  | 18912   | 2.9  | 18.7274 | 2.1 | 0.3198 | 2.6 | 0.0435 | 1.5 | 0.60 | 274.2 | 4.2 | 281.8 | 6.3 | 344.7 | 46.7 | 274.2 | 4.2 |
| Donjek-Spot 256 | 222  | 20608   | 3.1  | 19.1793 | 1.1 | 0.3129 | 1.4 | 0.0435 | 0.9 | 0.64 | 274.7 | 2.4 | 276.4 | 3.4 | 290.5 | 24.6 | 274.7 | 2.4 |
| Donjek-Spot 182 | 312  | 8532    | 3.8  | 19.6845 | 0.9 | 0.3050 | 1.9 | 0.0436 | 1.7 | 0.89 | 274.9 | 4.6 | 270.3 | 4.6 | 230.8 | 20.0 | 274.9 | 4.6 |
| Donjek-Spot 105 | 243  | 43202   | 5.2  | 18.9488 | 1.1 | 0.3170 | 1.5 | 0.0436 | 1.1 | 0.69 | 275.0 | 2.8 | 279.6 | 3.7 | 318.1 | 25.1 | 275.0 | 2.8 |
| Donjek-Spot 242 | 524  | 39292   | 2.3  | 19.3402 | 0.8 | 0.3110 | 1.7 | 0.0436 | 1.6 | 0.90 | 275.3 | 4.2 | 274.9 | 4.2 | 271.4 | 17.3 | 275.3 | 4.2 |
| Donjek-Spot 65  | 575  | 70947   | 3.1  | 19.1024 | 0.9 | 0.3151 | 1.4 | 0.0437 | 1.1 | 0.79 | 275.6 | 3.0 | 278.1 | 3.4 | 299.7 | 19.6 | 275.6 | 3.0 |
| Donjek-Spot 154 | 586  | 43235   | 1.6  | 19.3464 | 0.8 | 0.3116 | 1.7 | 0.0437 | 1.5 | 0.87 | 276.0 | 3.9 | 275.4 | 4.0 | 270.7 | 19.3 | 276.0 | 3.9 |
| Donjek-Spot 285 | 861  | 28702   | 2.2  | 18.9798 | 0.9 | 0.3179 | 1.6 | 0.0438 | 1.3 | 0.84 | 276.3 | 3.6 | 280.3 | 3.9 | 314.4 | 19.4 | 276.3 | 3.6 |
| Donjek-Spot 199 | 1189 | 606358  | 2.0  | 19.2046 | 0.8 | 0.3143 | 1.4 | 0.0438 | 1.1 | 0.82 | 276.4 | 3.1 | 277.5 | 3.4 | 287.5 | 18.2 | 276.4 | 3.1 |
| Donjek-Spot 257 | 458  | 51273   | 2.9  | 19.4819 | 1.1 | 0.3099 | 1.7 | 0.0438 | 1.3 | 0.77 | 276.4 | 3.5 | 274.1 | 4.1 | 254.7 | 25.2 | 276.4 | 3.5 |
| Donjek-Spot 111 | 331  | 111416  | 3.7  | 18.9251 | 0.9 | 0.3190 | 1.6 | 0.0438 | 1.4 | 0.83 | 276.4 | 3.7 | 281.2 | 4.0 | 321.0 | 20.5 | 276.4 | 3.7 |
| Donjek-Spot 153 | 1701 | 263092  | 1.4  | 19.1648 | 0.8 | 0.3151 | 1.8 | 0.0438 | 1.6 | 0.91 | 276.4 | 4.4 | 278.1 | 4.4 | 292.3 | 17.2 | 276.4 | 4.4 |
| Donjek-Spot 1   | 502  | 22862   | 7.2  | 19.7270 | 1.0 | 0.3067 | 1.8 | 0.0439 | 1.5 | 0.85 | 277.0 | 4.1 | 271.7 | 4.3 | 225.9 | 22.1 | 277.0 | 4.1 |
| Donjek-Spot 214 | 369  | 9051    | 2.3  | 18.9795 | 1.2 | 0.3189 | 2.0 | 0.0439 | 1.6 | 0.78 | 277.0 | 4.3 | 281.0 | 4.9 | 314.4 | 28.3 | 277.0 | 4.3 |
| Donjek-Spot 133 | 263  | 52801   | 4.6  | 19.1386 | 0.9 | 0.3164 | 1.5 | 0.0439 | 1.1 | 0.77 | 277.2 | 3.1 | 279.2 | 3.6 | 295.4 | 21.4 | 277.2 | 3.1 |
| Donjek-Spot 179 | 315  | 44716   | 2.4  | 19.1462 | 0.8 | 0.3163 | 1.2 | 0.0439 | 0.9 | 0.74 | 277.2 | 2.4 | 279.1 | 2.9 | 294.5 | 18.3 | 277.2 | 2.4 |
| Donjek-Spot 4   | 7564 | 166727  | 5.7  | 18.4256 | 0.6 | 0.3288 | 1.1 | 0.0440 | 0.9 | 0.82 | 277.3 | 2.5 | 288.6 | 2.8 | 381.4 | 14.5 | 277.3 | 2.5 |
| Donjek-Spot 127 | 302  | 8548    | 3.4  | 19.8571 | 0.9 | 0.3052 | 1.5 | 0.0440 | 1.2 | 0.80 | 277.5 | 3.2 | 270.5 | 3.5 | 210.6 | 20.7 | 277.5 | 3.2 |
| Donjek-Spot 249 | 362  | 84021   | 1.8  | 19.3872 | 0.8 | 0.3129 | 1.7 | 0.0440 | 1.5 | 0.88 | 277.7 | 4.0 | 276.5 | 4.1 | 265.9 | 18.5 | 277.7 | 4.0 |
| Donjek-Spot 100 | 1206 | 4828    | 7.2  | 13.9486 | 2.5 | 0.4353 | 2.9 | 0.0441 | 1.5 | 0.50 | 277.9 | 4.0 | 366.9 | 9.1 | 976.3 | 51.9 | 277.9 | 4.0 |
| Donjek-Spot 114 | 27   | 1223    | 3.4  | 23.7415 | 2.8 | 0.2558 | 3.0 | 0.0441 | 1.2 | 0.40 | 278.0 | 3.3 | 231.3 | 6.3 | NA    | NA   | 278.0 | 3.3 |
| Donjek-Spot 80  | 1045 | 2802415 | 5.9  | 19.2906 | 0.7 | 0.3149 | 1.3 | 0.0441 | 1.1 | 0.84 | 278.1 | 3.1 | 278.0 | 3.3 | 277.3 | 16.9 | 278.1 | 3.1 |
| Donjek-Spot 233 | 1149 | 35916   | 2.1  | 19.3316 | 0.6 | 0.3144 | 1.4 | 0.0441 | 1.3 | 0.89 | 278.2 | 3.5 | 277.6 | 3.5 | 272.4 | 14.9 | 278.2 | 3.5 |
| Donjek-Spot 93  | 220  | 12531   | 5.3  | 19.1106 | 1.2 | 0.3182 | 1.6 | 0.0441 | 1.0 | 0.64 | 278.4 | 2.8 | 280.5 | 3.9 | 298.7 | 27.9 | 278.4 | 2.8 |
| Donjek-Spot 260 | 464  | 20651   | 4.3  | 19.4884 | 0.9 | 0.3121 | 1.7 | 0.0441 | 1.5 | 0.86 | 278.4 | 4.0 | 275.8 | 4.1 | 253.9 | 20.2 | 278.4 | 4.0 |
| Donjek-Spot 236 | 1221 | 125317  | 2.2  | 19.2764 | 0.7 | 0.3156 | 1.4 | 0.0441 | 1.2 | 0.86 | 278.4 | 3.3 | 278.5 | 3.4 | 279.0 | 16.6 | 278.4 | 3.3 |
| Donjek-Spot 176 | 238  | 152419  | 3.1  | 18.9705 | 1.1 | 0.3210 | 1.5 | 0.0442 | 0.9 | 0.64 | 278.7 | 2.6 | 282.7 | 3.6 | 315.5 | 25.8 | 278.7 | 2.6 |
| Donjek-Spot 254 | 1505 | 76871   | 4.6  | 19.0461 | 0.8 | 0.3197 | 1.7 | 0.0442 | 1.5 | 0.87 | 278.7 | 4.0 | 281.7 | 4.2 | 306.4 | 19.0 | 278.7 | 4.0 |
| Donjek-Spot 228 | 539  | 87999   | 2.6  | 19.3284 | 0.8 | 0.3151 | 1.6 | 0.0442 | 1.4 | 0.85 | 278.8 | 3.7 | 278.1 | 3.9 | 272.8 | 19.1 | 278.8 | 3.7 |
| Donjek-Spot 107 | 521  | 68566   | 5.2  | 18.9578 | 0.8 | 0.3213 | 1.7 | 0.0442 | 1.5 | 0.89 | 278.8 | 4.2 | 282.9 | 4.2 | 317.0 | 17.8 | 278.8 | 4.2 |
| Donjek-Spot 162 | 1621 | 62927   | 0.8  | 19.1975 | 0.9 | 0.3177 | 1.7 | 0.0443 | 1.5 | 0.87 | 279.1 | 4.1 | 280.1 | 4.2 | 288.4 | 19.6 | 279.1 | 4.1 |
| Donjek-Spot 274 | 699  | 27732   | 2.6  | 19.2602 | 0.8 | 0.3167 | 1.5 | 0.0443 | 1.2 | 0.84 | 279.1 | 3.4 | 279.3 | 3.6 | 280.9 | 18.1 | 279.1 | 3.4 |
| Donjek-Spot 14  | 312  | 63187   | 2.1  | 19.3602 | 0.9 | 0.3151 | 1.4 | 0.0443 | 1.0 | 0.73 | 279.2 | 2.8 | 278.1 | 3.4 | 269.0 | 21.7 | 279.2 | 2.8 |
| Donjek-Spot 282 | 468  | 81432   | 3.1  | 19.4419 | 0.9 | 0.3138 | 1.8 | 0.0443 | 1.5 | 0.86 | 279.3 | 4.2 | 277.2 | 4.3 | 259.4 | 20.7 | 279.3 | 4.2 |
| Donjek-Spot 149 | 166  | 14812   | 4.2  | 19.4378 | 1.4 | 0.3140 | 1.7 | 0.0443 | 1.0 | 0.56 | 279.3 | 2.6 | 277.2 | 4.1 | 259.9 | 32.4 | 279.3 | 2.6 |
| Donjek-Spot 51  | 1208 | 43840   | 2.1  | 19.2803 | 0.7 | 0.3167 | 1.3 | 0.0443 | 1.1 | 0.85 | 279.5 | 3.1 | 279.4 | 3.3 | 278.6 | 16.2 | 279.5 | 3.1 |
| Donjek-Spot 286 | 2208 | 660854  | 1.4  | 19.0527 | 0.6 | 0.3208 | 1.6 | 0.0443 | 1.4 | 0.91 | 279.7 | 3.9 | 282.5 | 3.9 | 305.7 | 14.7 | 279.7 | 3.9 |
| Donjek-Spot 189 | 621  | 51030   | 1.6  | 19.0793 | 0.9 | 0.3203 | 1.6 | 0.0443 | 1.3 | 0.81 | 279.7 | 3.5 | 282.1 | 3.9 | 302.4 | 21.1 | 279.7 | 3.5 |
| Donjek-Spot 185 | 4665 | 262447  | 5.1  | 18.9862 | 0.6 | 0.3219 | 1.4 | 0.0443 | 1.2 | 0.89 | 279.7 | 3.4 | 283.4 | 3.5 | 313.6 | 14.7 | 279.7 | 3.4 |
| Donjek-Spot 116 | 699  | 82325   | 3.0  | 19.1751 | 0.8 | 0.3189 | 1.6 | 0.0444 | 1.4 | 0.87 | 279.9 | 3.8 | 281.1 | 3.9 | 291.1 | 18.0 | 279.9 | 3.8 |
| Donjek-Spot 210 | 868  | 33826   | 2.6  | 19.4009 | 0.8 | 0.3153 | 1.8 | 0.0444 | 1.5 | 0.88 | 279.9 | 4.2 | 278.3 | 4.3 | 264.2 | 19.4 | 279.9 | 4.2 |
| Donjek-Spot 283 | 411  | 124885  | 6.6  | 19.2735 | 0.8 | 0.3175 | 1.5 | 0.0444 | 1.3 | 0.84 | 280.1 | 3.5 | 280.0 | 3.7 | 279.4 | 18.8 | 280.1 | 3.5 |
| Donjek-Spot 221 | 245  | 24563   | 3.9  | 18.8512 | 1.1 | 0.3247 | 1.5 | 0.0444 | 0.9 | 0.62 | 280.1 | 2.5 | 285.5 | 3.6 | 329.8 | 25.8 | 280.1 | 2.5 |
| Donjek-Spot 97  | 893  | 44483   | 2.5  | 19.3380 | 0.7 | 0.3166 | 1.5 | 0.0444 | 1.3 | 0.87 | 280.2 | 3.5 | 279.3 | 3.6 | 271.7 | 16.5 | 280.2 | 3.5 |
| Donjek-Spot 101 | 243  | 16615   | 2.3  | 19.5537 | 0.9 | 0.3133 | 1.5 | 0.0444 | 1.2 | 0.79 | 280.4 | 3.3 | 276.7 | 3.7 | 246.2 | 21.4 | 280.4 | 3.3 |
| Donjek-Spot 258 | 540  | 21581   | 2.1  | 19.3862 | 1.0 | 0.3162 | 1.9 | 0.0445 | 1.7 | 0.86 | 280.5 | 4.6 | 278.9 | 4.8 | 266.0 | 23.1 | 280.5 | 4.6 |
| Donjek-Spot 235 | 754  | 32302   | 3.8  | 19.5009 | 0.8 | 0.3145 | 1.5 | 0.0445 | 1.3 | 0.85 | 280.7 | 3.6 | 277.7 | 3.7 | 252.4 | 18.5 | 280.7 | 3.6 |
| Donjek-Spot 132 | 370  | 205728  | 2.4  | 19.0227 | 0.8 | 0.3224 | 1.6 | 0.0445 | 1.4 | 0.86 | 280.7 | 3.8 | 283.8 | 4.0 | 309.2 | 18.9 | 280.7 | 3.8 |
| Donjek-Spot 172 | 634  | 104305  | 16.8 | 19.1235 | 0.7 | 0.3208 | 1.6 | 0.0445 | 1.5 | 0.91 | 280.8 | 4.1 | 282.5 | 4.0 | 297.2 | 15.7 | 280.8 | 4.1 |
| Donjek-Spot 288 | 699  | 84707   | 2.4  | 19.4310 | 0.7 | 0.3160 | 1.3 | 0.0445 | 1.1 | 0.85 | 281.0 | 3.1 | 278.8 | 3.2 | 260.7 | 15.9 | 281.0 | 3.1 |
| Donjek-Spot 131 | 272  | 72198   | 2.5  | 19.2165 | 1.2 | 0.3196 | 1.8 | 0.0446 | 1.3 | 0.75 | 281.0 | 3.7 | 281.6 | 4.4 | 286.1 | 27.0 | 281.0 | 3.7 |
| Donjek-Spot 238 | 235  | 22701   | 3.3  | 19.3158 | 1.1 | 0.3184 | 1.5 | 0.0446 | 0.9 | 0.62 | 281.4 | 2.5 | 280.7 | 3.6 | 274.3 | 26.2 | 281.4 | 2.5 |
| Donjek-Spot 261 | 150  | 6711    | 3.3  | 19.8429 | 0.9 | 0.3100 | 1.4 | 0.0446 | 1.0 | 0.72 | 281.5 | 2.7 | 274.2 | 3.2 | 212.3 | 21.9 | 281.5 | 2.7 |
| Donjek-Spot 40  | 892  | 145657  | 2.8  | 19.2233 | 0.8 | 0.3200 | 1.3 | 0.0446 | 1.1 | 0.79 | 281.5 | 2.9 | 281.9 | 3.3 | 285.3 | 18.8 | 281.5 | 2.9 |
| Donjek-Spot 280 | 332  | 61373   | 2.9  | 19.5015 | 0.9 | 0.3154 | 1.5 | 0.0446 | 1.1 | 0.77 | 281.5 | 3.1 | 278.4 | 3.5 | 252.4 | 21.5 | 281.5 | 3.1 |
| Donjek-Spot 239 | 780  | 45359   | 2.8  | 19.3328 | 0.9 | 0.3183 | 1.7 | 0.0447 | 1.4 | 0.84 | 281.6 | 3.8 | 280.6 | 4.1 | 272.3 | 20.8 | 281.6 | 3.8 |
| Donjek-Spot 108 | 1066 | 221640  | 2.8  | 19.2195 | 0.8 | 0.3203 | 1.4 | 0.0447 | 1.2 | 0.82 | 281.7 | 3.2 | 282.1 | 3.5 | 285.7 | 18.4 | 281.7 | 3.2 |
| Donjek-Spot 224 | 910  | 72968   | 17.6 | 19.2100 | 0.7 | 0.3204 | 1.4 | 0.0447 | 1.3 | 0.87 | 281.7 | 3.4 | 282.2 | 3.5 | 286.9 | 15.9 | 281.7 | 3.4 |
| Donjek-Spot 23  | 1211 | 86567   | 4.6  | 19.3490 | 0.7 | 0.3181 | 1.4 | 0.0447 | 1.2 | 0.87 | 281.7 | 3.4 | 280.5 | 3.5 | 270.4 | 16.0 | 281.7 | 3.4 |
| Donjek-Spot 252 | 113  | 41503   | 5.5  | 18.9241 | 1.4 | 0.3254 | 1.8 | 0.0447 | 1.1 | 0.62 | 281.8 | 3.0 | 286.0 | 4.5 | 321.1 | 32.1 | 281.8 | 3.0 |
| Donjek-Spot 152 | 244  | 21144   | 3.6  | 19.0889 | 1.1 | 0.3228 | 1.6 | 0.0447 | 1.1 | 0.71 | 281.9 | 3.1 | 284.0 | 3.9 | 301.3 | 25.2 | 281.9 | 3.1 |
| Donjek-Spot 63  | 175  | 11952   | 3.7  | 19.4015 | 1.4 | 0.3180 | 1.8 | 0.0448 | 1.1 | 0.59 | 282.3 | 2.9 | 280.4 | 4.3 | 264.2 | 32.7 | 282.3 | 2.9 |
| Donjek-Spot 28  | 171  | 12950   | 4.9  | 19.4149 | 1.1 | 0.3179 | 1.5 | 0.0448 | 1.0 | 0.67 | 282.4 | 2.8 | 280.3 | 3.7 | 262.6 | 25.8 | 282.4 | 2.8 |
| Donjek-Spot 293 | 363  | 47379   | 2.6  | 18.4996 | 0.6 | 0.3339 | 1.2 | 0.0448 | 1.0 | 0.85 | 282.6 | 2.9 | 292.5 | 3.1 | 372.4 | 14.6 | 282.6 | 2.9 |
| Donjek-Spot 250 | 266  | 12677   | 4.5  | 19.6266 | 1.2 | 0.3149 | 1.7 | 0.0448 | 1.2 | 0.71 | 282.8 | 3.3 | 278.0 | 4.1 | 237.6 | 27.4 | 282.8 | 3.3 |
| Donjek-Spot 39  | 229  | 19100   | 1.6  | 18.1426 | 2.5 | 0.3407 | 2.7 | 0.0449 | 1.0 | 0.36 | 282.8 | 2.7 | 297.7 | 7.0 | 416.1 | 56.3 | 282.8 | 2.7 |
| Donjek-Spot 265 | 997  | 69816   | 2.0  | 19.2433 | 0.8 | 0.3213 | 1.5 | 0.0449 | 1.3 | 0.84 | 282.9 | 3.5 | 282.9 | 3.7 | 282.9 | 18.5 | 282.9 | 3.5 |
| Donjek-Spot 140 | 2531 | 10      |      |         |     |        |     |        |     |      |       |     |       |     |       |      |       |     |

|                 |      |          |     |         |     |        |     |        |     |      |       |     |       |      |        |       |       |     |
|-----------------|------|----------|-----|---------|-----|--------|-----|--------|-----|------|-------|-----|-------|------|--------|-------|-------|-----|
| Donjek-Spot 143 | 973  | 45263    | 4.0 | 19.1620 | 0.7 | 0.3239 | 1.4 | 0.0450 | 1.2 | 0.86 | 283.9 | 3.2 | 284.9 | 3.4  | 292.6  | 15.7  | 283.9 | 3.2 |
| Donjek-Spot 69  | 155  | 9529     | 4.8 | 19.2087 | 1.7 | 0.3232 | 2.0 | 0.0451 | 1.1 | 0.55 | 284.1 | 3.1 | 284.4 | 5.0  | 287.1  | 38.3  | 284.1 | 3.1 |
| Donjek-Spot 208 | 419  | 132900   | 4.3 | 19.3880 | 0.8 | 0.3203 | 1.4 | 0.0451 | 1.2 | 0.84 | 284.1 | 3.3 | 282.1 | 3.5  | 265.8  | 18.0  | 284.1 | 3.3 |
| Donjek-Spot 212 | 2337 | 2066758  | 1.9 | 19.3094 | 0.7 | 0.3216 | 1.5 | 0.0451 | 1.3 | 0.90 | 284.1 | 3.7 | 283.2 | 3.7  | 275.1  | 15.0  | 284.1 | 3.7 |
| Donjek-Spot 96  | 715  | 38571    | 2.8 | 19.2477 | 0.9 | 0.3228 | 1.8 | 0.0451 | 1.5 | 0.87 | 284.2 | 4.3 | 284.0 | 4.4  | 282.4  | 20.3  | 284.2 | 4.3 |
| Donjek-Spot 49  | 410  | 38528    | 3.7 | 19.0585 | 0.8 | 0.3261 | 1.7 | 0.0451 | 1.5 | 0.89 | 284.4 | 4.3 | 286.6 | 4.3  | 305.0  | 18.2  | 284.4 | 4.3 |
| Donjek-Spot 222 | 394  | 73881    | 4.9 | 19.1097 | 0.7 | 0.3255 | 1.3 | 0.0451 | 1.1 | 0.82 | 284.5 | 3.0 | 286.1 | 3.2  | 298.8  | 17.0  | 284.5 | 3.0 |
| Donjek-Spot 287 | 232  | 73150    | 2.2 | 19.2788 | 1.0 | 0.3229 | 1.3 | 0.0452 | 0.8 | 0.64 | 284.8 | 2.3 | 284.1 | 3.1  | 278.7  | 22.3  | 284.8 | 2.3 |
| Donjek-Spot 32  | 1751 | 760169   | 3.4 | 19.1405 | 0.7 | 0.3253 | 1.5 | 0.0452 | 1.3 | 0.87 | 284.9 | 3.6 | 286.0 | 3.7  | 295.2  | 16.8  | 284.9 | 3.6 |
| Donjek-Spot 160 | 214  | 17024    | 5.9 | 19.3828 | 1.2 | 0.3213 | 1.5 | 0.0452 | 0.9 | 0.61 | 284.9 | 2.6 | 282.9 | 3.7  | 266.4  | 27.5  | 284.9 | 2.6 |
| Donjek-Spot 74  | 700  | 36193    | 1.7 | 19.4749 | 0.8 | 0.3199 | 1.5 | 0.0452 | 1.3 | 0.86 | 285.0 | 3.6 | 281.9 | 3.7  | 255.5  | 17.7  | 285.0 | 3.6 |
| Donjek-Spot 262 | 1693 | 96772    | 4.7 | 19.2672 | 0.7 | 0.3234 | 1.3 | 0.0452 | 1.2 | 0.87 | 285.1 | 3.2 | 284.5 | 3.3  | 280.1  | 15.3  | 285.1 | 3.2 |
| Donjek-Spot 211 | 1412 | 806997   | 2.3 | 19.1891 | 0.7 | 0.3247 | 1.7 | 0.0452 | 1.5 | 0.90 | 285.1 | 4.3 | 285.5 | 4.2  | 289.4  | 16.8  | 285.1 | 4.3 |
| Donjek-Spot 87  | 308  | 67278    | 5.6 | 19.2729 | 1.1 | 0.3235 | 1.5 | 0.0452 | 1.0 | 0.69 | 285.2 | 2.9 | 284.6 | 3.7  | 279.4  | 24.6  | 285.2 | 2.9 |
| Donjek-Spot 206 | 408  | 33466    | 5.7 | 19.2127 | 0.9 | 0.3246 | 1.9 | 0.0452 | 1.6 | 0.86 | 285.3 | 4.5 | 285.4 | 4.6  | 286.6  | 21.7  | 285.3 | 4.5 |
| Donjek-Spot 223 | 295  | 56975    | 8.4 | 19.3931 | 1.0 | 0.3217 | 1.4 | 0.0453 | 1.0 | 0.70 | 285.4 | 2.8 | 283.2 | 3.6  | 265.2  | 23.4  | 285.4 | 2.8 |
| Donjek-Spot 124 | 886  | 200396   | 5.0 | 19.1259 | 0.8 | 0.3262 | 1.5 | 0.0453 | 1.2 | 0.82 | 285.4 | 3.4 | 286.7 | 3.7  | 296.9  | 19.3  | 285.4 | 3.4 |
| Donjek-Spot 216 | 375  | 19709    | 4.2 | 19.4131 | 0.6 | 0.3217 | 1.3 | 0.0453 | 1.1 | 0.87 | 285.7 | 3.2 | 283.2 | 3.2  | 262.8  | 14.6  | 285.7 | 3.2 |
| Donjek-Spot 83  | 770  | 99409    | 1.7 | 18.9462 | 0.9 | 0.3296 | 1.6 | 0.0453 | 1.2 | 0.79 | 285.7 | 3.4 | 289.3 | 3.9  | 318.4  | 21.4  | 285.7 | 3.4 |
| Donjek-Spot 180 | 1296 | 8845     | 0.5 | 15.2676 | 1.1 | 0.4092 | 2.2 | 0.0453 | 1.9 | 0.87 | 285.8 | 5.3 | 348.3 | 6.4  | 789.4  | 22.7  | 285.8 | 5.3 |
| Donjek-Spot 34  | 910  | 289892   | 2.5 | 19.1483 | 0.6 | 0.3263 | 1.2 | 0.0453 | 1.1 | 0.86 | 285.8 | 3.0 | 286.7 | 3.1  | 294.2  | 14.6  | 285.8 | 3.0 |
| Donjek-Spot 82  | 351  | 56356    | 3.2 | 19.3087 | 0.9 | 0.3237 | 1.2 | 0.0454 | 0.9 | 0.71 | 285.9 | 2.5 | 284.8 | 3.1  | 275.1  | 19.8  | 285.9 | 2.5 |
| Donjek-Spot 195 | 751  | 177455   | 4.0 | 19.2047 | 0.8 | 0.3255 | 1.6 | 0.0454 | 1.3 | 0.85 | 286.0 | 3.8 | 286.1 | 4.0  | 287.5  | 19.3  | 286.0 | 3.8 |
| Donjek-Spot 146 | 240  | 193834   | 7.1 | 19.2068 | 1.1 | 0.3255 | 1.6 | 0.0454 | 1.1 | 0.71 | 286.0 | 3.2 | 286.1 | 4.0  | 287.2  | 25.9  | 286.0 | 3.2 |
| Donjek-Spot 168 | 212  | 10200    | 3.2 | 19.7001 | 1.6 | 0.3174 | 1.8 | 0.0454 | 0.9 | 0.47 | 286.0 | 2.4 | 279.9 | 4.4  | 229.0  | 36.7  | 286.0 | 2.4 |
| Donjek-Spot 0   | 1376 | 144460   | 3.0 | 19.1138 | 0.6 | 0.3272 | 1.6 | 0.0454 | 1.5 | 0.93 | 286.1 | 4.1 | 287.4 | 3.9  | 298.3  | 12.7  | 286.1 | 4.1 |
| Donjek-Spot 159 | 809  | 6835     | 2.7 | 12.8076 | 6.2 | 0.4884 | 6.4 | 0.0454 | 1.8 | 0.28 | 286.1 | 5.0 | 403.8 | 21.5 | 1148.0 | 123.1 | 286.1 | 5.0 |
| Donjek-Spot 86  | 451  | 33018    | 2.3 | 19.1151 | 0.8 | 0.3274 | 1.5 | 0.0454 | 1.2 | 0.82 | 286.3 | 3.4 | 287.6 | 3.7  | 298.2  | 18.8  | 286.3 | 3.4 |
| Donjek-Spot 276 | 399  | 78773    | 3.6 | 19.1772 | 1.0 | 0.3264 | 1.7 | 0.0454 | 1.4 | 0.82 | 286.3 | 3.8 | 286.8 | 4.1  | 290.8  | 21.9  | 286.3 | 3.8 |
| Donjek-Spot 174 | 390  | 29462    | 4.7 | 19.1555 | 1.0 | 0.3268 | 1.7 | 0.0454 | 1.4 | 0.82 | 286.3 | 4.0 | 287.1 | 4.3  | 293.4  | 22.3  | 286.3 | 4.0 |
| Donjek-Spot 106 | 151  | 10136    | 4.2 | 19.2512 | 1.2 | 0.3253 | 1.6 | 0.0454 | 1.0 | 0.63 | 286.5 | 2.8 | 286.0 | 4.0  | 282.0  | 28.4  | 286.5 | 2.8 |
| Donjek-Spot 201 | 881  | 20155799 | 2.9 | 18.9774 | 0.9 | 0.3300 | 1.7 | 0.0454 | 1.4 | 0.84 | 286.5 | 4.0 | 289.6 | 4.2  | 314.7  | 20.5  | 286.5 | 4.0 |
| Donjek-Spot 193 | 627  | 238327   | 2.6 | 19.3979 | 0.8 | 0.3229 | 1.5 | 0.0454 | 1.2 | 0.83 | 286.5 | 3.4 | 284.1 | 3.6  | 264.6  | 19.0  | 286.5 | 3.4 |
| Donjek-Spot 157 | 724  | 1588696  | 2.3 | 19.2804 | 0.8 | 0.3249 | 1.4 | 0.0454 | 1.2 | 0.82 | 286.5 | 3.3 | 285.6 | 3.5  | 278.5  | 18.9  | 286.5 | 3.3 |
| Donjek-Spot 188 | 511  | 171943   | 2.2 | 19.1180 | 0.9 | 0.3277 | 1.8 | 0.0455 | 1.6 | 0.88 | 286.5 | 4.5 | 287.8 | 4.6  | 297.8  | 20.0  | 286.5 | 4.5 |
| Donjek-Spot 135 | 490  | 53128    | 2.7 | 18.9508 | 0.9 | 0.3305 | 1.5 | 0.0455 | 1.2 | 0.80 | 286.5 | 3.3 | 290.0 | 3.8  | 317.8  | 20.4  | 286.5 | 3.3 |
| Donjek-Spot 112 | 603  | 179682   | 2.2 | 19.1516 | 0.9 | 0.3271 | 1.6 | 0.0455 | 1.4 | 0.84 | 286.6 | 3.8 | 287.4 | 4.0  | 293.9  | 19.8  | 286.6 | 3.8 |
| Donjek-Spot 217 | 271  | 13169    | 1.8 | 19.8946 | 1.0 | 0.3150 | 1.3 | 0.0455 | 0.9 | 0.67 | 286.7 | 2.5 | 278.1 | 3.2  | 206.3  | 22.9  | 286.7 | 2.5 |
| Donjek-Spot 225 | 348  | 41386    | 8.3 | 19.3938 | 0.8 | 0.3232 | 1.4 | 0.0455 | 1.2 | 0.81 | 286.7 | 3.2 | 284.3 | 3.5  | 265.1  | 19.1  | 286.7 | 3.2 |
| Donjek-Spot 184 | 159  | 14867    | 5.8 | 19.1886 | 1.1 | 0.3269 | 1.6 | 0.0455 | 1.1 | 0.72 | 286.9 | 3.2 | 287.2 | 4.0  | 289.5  | 25.0  | 286.9 | 3.2 |
| Donjek-Spot 243 | 534  | 223444   | 3.6 | 19.0384 | 0.7 | 0.3296 | 1.6 | 0.0455 | 1.4 | 0.90 | 287.0 | 4.0 | 289.2 | 3.9  | 307.3  | 15.3  | 287.0 | 4.0 |
| Donjek-Spot 230 | 665  | 36165    | 2.4 | 19.2143 | 0.8 | 0.3266 | 1.7 | 0.0455 | 1.5 | 0.89 | 287.0 | 4.2 | 286.9 | 4.2  | 286.4  | 17.4  | 287.0 | 4.2 |
| Donjek-Spot 98  | 609  | 48886    | 2.6 | 19.1992 | 0.7 | 0.3273 | 1.4 | 0.0456 | 1.2 | 0.85 | 287.4 | 3.3 | 287.5 | 3.5  | 288.2  | 17.0  | 287.4 | 3.3 |
| Donjek-Spot 118 | 599  | 32374    | 3.8 | 19.3072 | 0.7 | 0.3255 | 1.8 | 0.0456 | 1.6 | 0.92 | 287.5 | 4.6 | 286.1 | 4.5  | 275.3  | 16.5  | 287.5 | 4.6 |
| Donjek-Spot 298 | 1450 | 475990   | 3.5 | 19.1961 | 0.6 | 0.3274 | 1.6 | 0.0456 | 1.5 | 0.92 | 287.5 | 4.2 | 287.6 | 4.0  | 288.5  | 14.6  | 287.5 | 4.2 |
| Donjek-Spot 164 | 780  | 154345   | 1.9 | 19.3681 | 0.8 | 0.3246 | 1.7 | 0.0456 | 1.5 | 0.88 | 287.5 | 4.1 | 285.4 | 4.1  | 268.1  | 18.1  | 287.5 | 4.1 |
| Donjek-Spot 158 | 170  | 25271    | 4.1 | 19.5132 | 1.3 | 0.3223 | 1.6 | 0.0456 | 0.9 | 0.58 | 287.7 | 2.6 | 283.7 | 4.0  | 250.9  | 30.2  | 287.7 | 2.6 |
| Donjek-Spot 10  | 834  | 70165    | 2.1 | 19.0569 | 0.7 | 0.3301 | 1.3 | 0.0456 | 1.1 | 0.84 | 287.7 | 3.0 | 289.6 | 3.3  | 305.1  | 16.0  | 287.7 | 3.0 |
| Donjek-Spot 88  | 499  | 28402    | 2.2 | 19.4509 | 0.6 | 0.3235 | 1.4 | 0.0457 | 1.2 | 0.89 | 287.8 | 3.5 | 284.6 | 3.5  | 258.3  | 14.7  | 287.8 | 3.5 |
| Donjek-Spot 76  | 251  | 73469    | 4.1 | 18.8642 | 1.1 | 0.3337 | 1.6 | 0.0457 | 1.1 | 0.71 | 287.9 | 3.1 | 292.4 | 4.0  | 328.3  | 25.3  | 287.9 | 3.1 |
| Donjek-Spot 121 | 521  | 47998    | 6.1 | 19.3857 | 0.8 | 0.3251 | 1.4 | 0.0457 | 1.1 | 0.81 | 288.3 | 3.2 | 285.9 | 3.5  | 266.0  | 18.9  | 288.3 | 3.2 |
| Donjek-Spot 12  | 181  | 19412    | 4.0 | 18.8455 | 1.3 | 0.3345 | 1.5 | 0.0457 | 0.8 | 0.54 | 288.3 | 2.3 | 293.0 | 3.9  | 330.5  | 28.8  | 288.3 | 2.3 |
| Donjek-Spot 89  | 254  | 31161    | 6.1 | 19.2809 | 0.9 | 0.3270 | 1.6 | 0.0457 | 1.3 | 0.81 | 288.4 | 3.6 | 287.3 | 3.9  | 278.5  | 21.1  | 288.4 | 3.6 |
| Donjek-Spot 54  | 248  | 8424     | 5.6 | 19.6204 | 1.4 | 0.3214 | 1.7 | 0.0458 | 1.0 | 0.58 | 288.4 | 2.7 | 283.0 | 4.1  | 238.4  | 31.5  | 288.4 | 2.7 |
| Donjek-Spot 41  | 734  | 23757    | 4.6 | 19.2334 | 0.9 | 0.3279 | 1.7 | 0.0458 | 1.4 | 0.84 | 288.4 | 4.0 | 287.9 | 4.2  | 284.1  | 20.5  | 288.4 | 4.0 |
| Donjek-Spot 71  | 272  | 34324    | 6.0 | 19.2812 | 1.0 | 0.3274 | 1.4 | 0.0458 | 0.9 | 0.69 | 288.7 | 2.7 | 287.6 | 3.4  | 278.4  | 22.8  | 288.7 | 2.7 |
| Donjek-Spot 59  | 406  | 47868    | 3.2 | 19.0454 | 0.8 | 0.3315 | 1.8 | 0.0458 | 1.6 | 0.91 | 288.7 | 4.6 | 290.7 | 4.5  | 306.5  | 17.1  | 288.7 | 4.6 |
| Donjek-Spot 11  | 687  | 30733    | 2.9 | 19.2908 | 0.8 | 0.3275 | 1.4 | 0.0458 | 1.2 | 0.83 | 288.9 | 3.3 | 287.6 | 3.5  | 277.3  | 18.0  | 288.9 | 3.3 |
| Donjek-Spot 142 | 509  | 39187    | 2.0 | 19.6476 | 0.8 | 0.3217 | 1.5 | 0.0459 | 1.3 | 0.86 | 289.0 | 3.8 | 283.2 | 3.8  | 235.2  | 17.9  | 289.0 | 3.8 |
| Donjek-Spot 110 | 3392 | 376423   | 0.9 | 19.3217 | 0.6 | 0.3271 | 1.4 | 0.0459 | 1.3 | 0.89 | 289.1 | 3.6 | 287.4 | 3.5  | 273.6  | 14.8  | 289.1 | 3.6 |
| Donjek-Spot 178 | 1857 | 79390    | 1.6 | 18.8217 | 0.8 | 0.3360 | 2.0 | 0.0459 | 1.9 | 0.93 | 289.2 | 5.2 | 294.1 | 5.1  | 333.4  | 17.2  | 289.2 | 5.2 |
| Donjek-Spot 266 | 418  | 16706    | 4.1 | 19.4365 | 0.7 | 0.3259 | 1.4 | 0.0460 | 1.3 | 0.87 | 289.6 | 3.5 | 286.4 | 3.6  | 260.1  | 16.5  | 289.6 | 3.5 |
| Donjek-Spot 150 | 819  | 173621   | 2.5 | 19.1289 | 0.9 | 0.3313 | 1.6 | 0.0460 | 1.4 | 0.82 | 289.8 | 3.8 | 290.5 | 4.2  | 296.5  | 21.4  | 289.8 | 3.8 |
| Donjek-Spot 192 | 5297 | 288368   | 1.4 | 18.9084 | 0.7 | 0.3352 | 1.4 | 0.0460 | 1.2 | 0.88 | 289.8 | 3.4 | 293.5 | 3.5  | 323.0  | 14.8  | 289.8 | 3.4 |
| Donjek-Spot 119 | 1014 | 50836    | 3.5 | 19.0646 | 0.7 | 0.3325 | 1.6 | 0.0460 | 1.4 | 0.89 | 289.8 | 4.1 | 291.4 | 4.1  | 304.2  | 16.9  | 289.8 | 4.1 |
| Donjek-Spot 147 | 854  | 333157   | 2.5 | 19.2665 | 0.7 | 0.3290 | 1.3 | 0.0460 | 1.1 | 0.86 | 289.9 | 3.3 | 288.8 | 3.3  | 280.2  | 15.4  | 289.9 | 3.3 |
| Donjek-Spot 113 | 1547 | 634153   | 7.5 | 19.1027 | 0.7 | 0.3319 | 1.4 | 0.0460 | 1.3 | 0.89 | 290.0 | 3.6 | 291.1 | 3.6  | 299.7  | 15.0  | 290.0 | 3.6 |
| Donjek-Spot 7   | 234  | 7731     | 3.6 | 19.3691 | 1.0 | 0.3274 | 1.4 | 0.04   |     |      |       |     |       |      |        |       |       |     |

|                 |      |          |      |         |     |        |     |        |     |      |        |      |        |      |        |       |        |      |
|-----------------|------|----------|------|---------|-----|--------|-----|--------|-----|------|--------|------|--------|------|--------|-------|--------|------|
| Donjek-Spot 227 | 897  | 62638    | 2.7  | 19.2465 | 0.8 | 0.3309 | 1.6 | 0.0462 | 1.4 | 0.87 | 291.2  | 4.0  | 290.2  | 4.0  | 282.6  | 18.1  | 291.2  | 4.0  |
| Donjek-Spot 269 | 1194 | 75090    | 2.2  | 19.3573 | 0.7 | 0.3291 | 1.4 | 0.0462 | 1.2 | 0.87 | 291.3  | 3.5  | 288.8  | 3.5  | 269.4  | 15.9  | 291.3  | 3.5  |
| Donjek-Spot 187 | 563  | 45310    | 6.0  | 19.1631 | 1.0 | 0.3325 | 1.6 | 0.0462 | 1.3 | 0.80 | 291.3  | 3.7  | 291.4  | 4.1  | 292.5  | 22.5  | 291.3  | 3.7  |
| Donjek-Spot 31  | 948  | 62342    | 3.8  | 19.5305 | 0.8 | 0.3267 | 1.6 | 0.0463 | 1.4 | 0.86 | 291.8  | 3.9  | 287.1  | 4.0  | 248.9  | 18.5  | 291.8  | 3.9  |
| Donjek-Spot 170 | 812  | 96403    | 3.1  | 19.0951 | 0.7 | 0.3344 | 1.3 | 0.0463 | 1.1 | 0.85 | 292.0  | 3.3  | 292.9  | 3.4  | 300.6  | 16.2  | 292.0  | 3.3  |
| Donjek-Spot 99  | 946  | 43802    | 4.7  | 19.3321 | 0.7 | 0.3305 | 1.5 | 0.0464 | 1.3 | 0.88 | 292.1  | 3.8  | 289.9  | 3.8  | 272.4  | 16.7  | 292.1  | 3.8  |
| Donjek-Spot 60  | 2044 | 77772    | 1.3  | 19.1022 | 0.6 | 0.3347 | 1.0 | 0.0464 | 0.8 | 0.82 | 292.4  | 2.4  | 293.2  | 2.6  | 299.8  | 13.4  | 292.4  | 2.4  |
| Donjek-Spot 21  | 1140 | 69534    | 4.0  | 19.0295 | 0.8 | 0.3363 | 1.5 | 0.0464 | 1.3 | 0.84 | 292.6  | 3.6  | 294.4  | 3.9  | 308.4  | 18.8  | 292.6  | 3.6  |
| Donjek-Spot 3   | 644  | 45575    | 1.7  | 19.1411 | 0.7 | 0.3345 | 1.7 | 0.0465 | 1.6 | 0.91 | 292.7  | 4.5  | 293.0  | 4.4  | 295.1  | 16.9  | 292.7  | 4.5  |
| Donjek-Spot 91  | 646  | 71011    | 4.4  | 19.0537 | 0.7 | 0.3361 | 1.4 | 0.0465 | 1.2 | 0.86 | 292.8  | 3.5  | 294.2  | 3.6  | 305.5  | 16.6  | 292.8  | 3.5  |
| Donjek-Spot 141 | 561  | 108723   | 3.8  | 19.3756 | 0.8 | 0.3305 | 1.5 | 0.0465 | 1.3 | 0.86 | 292.8  | 3.8  | 289.9  | 3.9  | 267.2  | 18.0  | 292.8  | 3.8  |
| Donjek-Spot 289 | 318  | 45771    | 3.3  | 19.0417 | 0.9 | 0.3365 | 1.3 | 0.0465 | 1.0 | 0.75 | 293.0  | 2.9  | 294.5  | 3.4  | 307.0  | 20.1  | 293.0  | 2.9  |
| Donjek-Spot 241 | 949  | 50574    | 2.7  | 18.6299 | 0.9 | 0.3440 | 1.7 | 0.0465 | 1.4 | 0.84 | 293.0  | 4.1  | 300.2  | 4.4  | 356.5  | 20.7  | 293.0  | 4.1  |
| Donjek-Spot 73  | 282  | 11853    | 4.9  | 19.4438 | 1.7 | 0.3299 | 1.9 | 0.0465 | 0.9 | 0.50 | 293.2  | 2.7  | 289.5  | 4.8  | 259.1  | 38.0  | 293.2  | 2.7  |
| Donjek-Spot 138 | 3347 | 111723   | 2.2  | 19.0083 | 0.6 | 0.3377 | 1.4 | 0.0466 | 1.2 | 0.90 | 293.4  | 3.5  | 295.4  | 3.5  | 311.0  | 13.7  | 293.4  | 3.5  |
| Donjek-Spot 248 | 730  | 65702    | 4.0  | 19.3416 | 0.8 | 0.3321 | 1.5 | 0.0466 | 1.3 | 0.86 | 293.7  | 3.7  | 291.2  | 3.8  | 271.2  | 17.3  | 293.7  | 3.7  |
| Donjek-Spot 129 | 1050 | 1673365  | 2.3  | 19.1799 | 0.8 | 0.3352 | 1.4 | 0.0466 | 1.1 | 0.83 | 293.9  | 3.3  | 293.5  | 3.5  | 290.4  | 17.6  | 293.9  | 3.3  |
| Donjek-Spot 213 | 1246 | 84223    | 1.9  | 19.3340 | 0.7 | 0.3326 | 1.5 | 0.0467 | 1.3 | 0.89 | 294.0  | 3.8  | 291.6  | 3.8  | 272.1  | 15.7  | 294.0  | 3.8  |
| Donjek-Spot 52  | 311  | 40296    | 2.7  | 18.9930 | 0.9 | 0.3392 | 1.3 | 0.0467 | 0.9 | 0.73 | 294.5  | 2.7  | 296.5  | 3.3  | 312.8  | 20.0  | 294.5  | 2.7  |
| Donjek-Spot 30  | 796  | 87865    | 2.4  | 19.0220 | 0.9 | 0.3395 | 1.7 | 0.0469 | 1.5 | 0.86 | 295.2  | 4.2  | 296.8  | 4.4  | 309.3  | 19.9  | 295.2  | 4.2  |
| Donjek-Spot 122 | 736  | 775981   | 2.9  | 19.1929 | 0.7 | 0.3365 | 1.4 | 0.0469 | 1.2 | 0.84 | 295.2  | 3.3  | 294.5  | 3.5  | 288.9  | 16.9  | 295.2  | 3.3  |
| Donjek-Spot 229 | 239  | 11341    | 3.7  | 19.9562 | 1.1 | 0.3240 | 1.7 | 0.0469 | 1.4 | 0.79 | 295.6  | 4.0  | 285.0  | 4.3  | 199.1  | 24.6  | 295.6  | 4.0  |
| Donjek-Spot 35  | 1013 | 79638    | 3.1  | 19.1171 | 0.6 | 0.3394 | 1.5 | 0.0471 | 1.3 | 0.90 | 296.5  | 3.9  | 296.7  | 3.8  | 297.9  | 14.8  | 296.5  | 3.9  |
| Donjek-Spot 161 | 4024 | 111723   | 3.3  | 19.0102 | 0.7 | 0.3413 | 1.5 | 0.0471 | 1.4 | 0.88 | 296.6  | 3.9  | 298.2  | 4.0  | 310.7  | 16.7  | 296.6  | 3.9  |
| Donjek-Spot 299 | 2430 | 81165    | 2.9  | 19.2893 | 0.6 | 0.3366 | 1.4 | 0.0471 | 1.3 | 0.91 | 296.8  | 3.8  | 294.6  | 3.7  | 277.5  | 13.5  | 296.8  | 3.8  |
| Donjek-Spot 205 | 1265 | 263637   | 1.4  | 19.1474 | 0.7 | 0.3402 | 1.6 | 0.0473 | 1.5 | 0.91 | 297.7  | 4.3  | 297.4  | 4.2  | 294.3  | 15.8  | 297.7  | 4.3  |
| Donjek-Spot 128 | 716  | 82982    | 4.6  | 19.1562 | 0.9 | 0.3403 | 2.0 | 0.0473 | 1.8 | 0.90 | 297.9  | 5.2  | 297.4  | 5.1  | 293.3  | 20.0  | 297.9  | 5.2  |
| Donjek-Spot 22  | 2343 | 1515583  | 1.7  | 19.0852 | 0.7 | 0.3420 | 1.6 | 0.0474 | 1.4 | 0.90 | 298.3  | 4.2  | 298.7  | 4.1  | 301.8  | 16.1  | 298.3  | 4.2  |
| Donjek-Spot 268 | 158  | 6359     | 3.4  | 20.3021 | 1.9 | 0.3218 | 2.4 | 0.0474 | 1.3 | 0.57 | 298.6  | 3.9  | 283.3  | 5.8  | 159.0  | 45.3  | 298.6  | 3.9  |
| Donjek-Spot 218 | 975  | 386636   | 2.6  | 19.2828 | 0.8 | 0.3389 | 1.5 | 0.0474 | 1.3 | 0.84 | 298.6  | 3.7  | 296.3  | 3.9  | 278.2  | 19.0  | 298.6  | 3.7  |
| Donjek-Spot 46  | 1044 | 43360    | 1.2  | 19.1934 | 0.8 | 0.3408 | 1.5 | 0.0475 | 1.3 | 0.87 | 298.9  | 3.8  | 297.8  | 3.9  | 288.9  | 17.3  | 298.9  | 3.8  |
| Donjek-Spot 15  | 1055 | 92307    | 2.2  | 19.2372 | 0.6 | 0.3400 | 1.3 | 0.0475 | 1.1 | 0.86 | 298.9  | 3.2  | 297.2  | 3.2  | 283.7  | 14.5  | 298.9  | 3.2  |
| Donjek-Spot 50  | 672  | 63456    | 3.7  | 19.3383 | 0.6 | 0.3383 | 1.5 | 0.0475 | 1.4 | 0.91 | 299.0  | 4.0  | 295.9  | 3.9  | 271.6  | 14.3  | 299.0  | 4.0  |
| Donjek-Spot 263 | 353  | 44643    | 3.7  | 19.1775 | 0.9 | 0.3422 | 1.7 | 0.0476 | 1.5 | 0.87 | 299.8  | 4.4  | 298.8  | 4.5  | 290.7  | 19.7  | 299.8  | 4.4  |
| Donjek-Spot 92  | 1027 | 1252630  | 3.8  | 19.1212 | 0.7 | 0.3447 | 1.4 | 0.0478 | 1.3 | 0.87 | 301.2  | 3.7  | 300.7  | 3.8  | 297.5  | 16.3  | 301.2  | 3.7  |
| Donjek-Spot 177 | 1888 | 78818    | 1.1  | 19.1388 | 0.8 | 0.3444 | 1.5 | 0.0478 | 1.2 | 0.83 | 301.2  | 3.6  | 300.5  | 3.9  | 295.4  | 18.9  | 301.2  | 3.6  |
| Donjek-Spot 175 | 2181 | 15810705 | 7.1  | 18.8302 | 0.6 | 0.3503 | 1.3 | 0.0479 | 1.2 | 0.90 | 301.4  | 3.5  | 305.0  | 3.5  | 332.4  | 13.1  | 301.4  | 3.5  |
| Donjek-Spot 55  | 487  | 28877    | 2.2  | 17.8398 | 1.5 | 0.3708 | 2.2 | 0.0480 | 1.6 | 0.74 | 302.2  | 4.8  | 320.3  | 6.0  | 453.6  | 32.7  | 302.2  | 4.8  |
| Donjek-Spot 219 | 1492 | 3357964  | 38.8 | 19.1330 | 0.6 | 0.3460 | 1.3 | 0.0480 | 1.1 | 0.88 | 302.4  | 3.4  | 301.7  | 3.4  | 296.1  | 13.8  | 302.4  | 3.4  |
| Donjek-Spot 292 | 3286 | 106215   | 1.3  | 19.0526 | 0.7 | 0.3477 | 1.5 | 0.0481 | 1.3 | 0.89 | 302.6  | 4.0  | 303.0  | 4.0  | 305.7  | 15.8  | 302.6  | 4.0  |
| Donjek-Spot 24  | 1777 | 134542   | 5.0  | 19.0760 | 0.8 | 0.3474 | 1.7 | 0.0481 | 1.5 | 0.87 | 302.7  | 4.4  | 302.7  | 4.4  | 302.9  | 19.0  | 302.7  | 4.4  |
| Donjek-Spot 53  | 1558 | 251965   | 2.7  | 18.8630 | 0.7 | 0.3519 | 1.3 | 0.0482 | 1.1 | 0.84 | 303.2  | 3.2  | 306.1  | 3.4  | 328.4  | 15.7  | 303.2  | 3.2  |
| Donjek-Spot 220 | 1043 | 81916    | 1.2  | 19.1963 | 0.8 | 0.3460 | 1.6 | 0.0482 | 1.4 | 0.88 | 303.4  | 4.2  | 301.7  | 4.2  | 288.5  | 17.9  | 303.4  | 4.2  |
| Donjek-Spot 47  | 208  | 9926     | 3.6  | 19.9780 | 1.1 | 0.3326 | 1.4 | 0.0482 | 0.8 | 0.58 | 303.5  | 2.3  | 291.6  | 3.4  | 196.5  | 25.9  | 303.5  | 2.3  |
| Donjek-Spot 151 | 2412 | 90195    | 1.7  | 19.1820 | 0.7 | 0.3471 | 1.5 | 0.0483 | 1.4 | 0.90 | 304.1  | 4.1  | 302.5  | 4.0  | 290.2  | 15.3  | 304.1  | 4.1  |
| Donjek-Spot 165 | 3971 | 70082    | 5.1  | 18.3993 | 0.8 | 0.3625 | 1.4 | 0.0484 | 1.2 | 0.85 | 304.6  | 3.7  | 314.1  | 3.9  | 384.6  | 17.1  | 304.6  | 3.7  |
| Donjek-Spot 148 | 2022 | 163394   | 2.6  | 19.2504 | 0.6 | 0.3474 | 1.3 | 0.0485 | 1.1 | 0.88 | 305.5  | 3.4  | 302.8  | 3.3  | 282.1  | 13.7  | 305.5  | 3.4  |
| Donjek-Spot 294 | 1768 | 144626   | 1.7  | 19.0890 | 0.7 | 0.3512 | 1.4 | 0.0486 | 1.2 | 0.86 | 306.2  | 3.5  | 305.7  | 3.6  | 301.3  | 15.7  | 306.2  | 3.5  |
| Donjek-Spot 70  | 1482 | 140336   | 1.1  | 18.9337 | 0.6 | 0.3571 | 1.1 | 0.0491 | 0.9 | 0.83 | 308.8  | 2.8  | 310.1  | 2.9  | 319.9  | 13.9  | 308.8  | 2.8  |
| Donjek-Spot 181 | 1006 | 42570    | 3.3  | 19.4613 | 0.7 | 0.3475 | 1.4 | 0.0491 | 1.2 | 0.86 | 308.8  | 3.6  | 302.9  | 3.6  | 257.1  | 16.2  | 308.8  | 3.6  |
| Donjek-Spot 20  | 518  | 114346   | 2.8  | 19.2022 | 0.9 | 0.3528 | 1.5 | 0.0492 | 1.3 | 0.82 | 309.3  | 3.8  | 306.8  | 4.1  | 287.8  | 20.2  | 309.3  | 3.8  |
| Donjek-Spot 279 | 632  | 47014    | 10.1 | 18.9695 | 1.5 | 0.3571 | 2.1 | 0.0492 | 1.5 | 0.72 | 309.3  | 4.7  | 310.1  | 5.7  | 315.6  | 33.9  | 309.3  | 4.7  |
| Donjek-Spot 36  | 148  | 20939    | 3.9  | 20.0159 | 1.3 | 0.3397 | 1.8 | 0.0493 | 1.2 | 0.69 | 310.5  | 3.7  | 297.0  | 4.5  | 192.2  | 29.8  | 310.5  | 3.7  |
| Donjek-Spot 6   | 468  | 12744    | 4.1  | 10.7089 | 5.5 | 0.7259 | 5.6 | 0.0564 | 1.4 | 0.25 | 353.7  | 4.7  | 554.1  | 24.1 | 1494.8 | 103.4 | 353.7  | 4.7  |
| Donjek-Spot 273 | 221  | 46569    | 1.2  | 18.0615 | 0.8 | 0.4945 | 1.3 | 0.0648 | 1.1 | 0.79 | 404.8  | 4.1  | 408.0  | 4.5  | 426.1  | 18.5  | 404.8  | 4.1  |
| Donjek-Spot 37  | 194  | 150792   | 0.8  | 17.8252 | 1.3 | 0.5383 | 1.7 | 0.0696 | 1.2 | 0.67 | 433.9  | 4.9  | 437.3  | 6.1  | 455.4  | 28.4  | 433.9  | 4.9  |
| Donjek-Spot 42  | 315  | 31094    | 1.8  | 17.7714 | 0.9 | 0.5409 | 1.5 | 0.0697 | 1.3 | 0.82 | 434.6  | 5.3  | 439.0  | 5.5  | 462.1  | 19.7  | 434.6  | 5.3  |
| Donjek-Spot 33  | 135  | 7165     | 2.3  | 18.4560 | 1.2 | 0.5222 | 1.5 | 0.0699 | 0.9 | 0.60 | 435.8  | 3.9  | 426.6  | 5.3  | 377.7  | 27.2  | 435.8  | 3.9  |
| Donjek-Spot 190 | 272  | 15943    | 2.4  | 18.4135 | 0.9 | 0.5242 | 1.3 | 0.0700 | 1.0 | 0.75 | 436.4  | 4.1  | 428.0  | 4.6  | 382.8  | 19.5  | 436.4  | 4.1  |
| Donjek-Spot 247 | 554  | 78624    | 1.7  | 18.0992 | 0.8 | 0.5392 | 1.5 | 0.0708 | 1.3 | 0.84 | 441.1  | 5.5  | 437.9  | 5.5  | 421.4  | 18.8  | 441.1  | 5.5  |
| Donjek-Spot 183 | 442  | 277023   | 4.0  | 18.1888 | 0.6 | 0.5382 | 1.5 | 0.0710 | 1.3 | 0.90 | 442.3  | 5.7  | 437.2  | 5.3  | 410.4  | 14.4  | 442.3  | 5.7  |
| Donjek-Spot 61  | 743  | 215264   | 1.9  | 17.8383 | 0.7 | 0.5596 | 1.6 | 0.0724 | 1.4 | 0.89 | 450.7  | 6.0  | 451.2  | 5.7  | 453.8  | 16.0  | 450.7  | 6.0  |
| Donjek-Spot 145 | 170  | 20505    | 2.1  | 18.1567 | 0.9 | 0.5549 | 1.3 | 0.0731 | 1.0 | 0.75 | 454.9  | 4.2  | 448.2  | 4.6  | 414.3  | 19.0  | 454.9  | 4.2  |
| Donjek-Spot 136 | 597  | 75145    | 10.8 | 13.4145 | 0.7 | 1.8853 | 1.3 | 0.1835 | 1.0 | 0.82 | 1086.1 | 10.3 | 1075.9 | 8.4  | 1055.4 | 14.7  | 1055.4 | 14.7 |
| Donjek-Spot 16  | 71   | 33293    | 1.4  | 13.4102 | 0.7 | 1.7820 | 1.2 | 0.1734 | 1.0 | 0.82 | 1030.8 | 9.3  | 1038.9 | 7.7  | 1056.1 | 13.8  | 1056.1 | 13.8 |
| Donjek-Spot 166 | 194  | 44402    | 2.1  | 10.5793 | 0.8 | 3.3886 | 1.2 | 0.2601 | 0.9 | 0.76 | 1490.4 | 12.2 | 1501.8 | 9.4  | 1517.8 | 14.7  | 1517.8 | 14.7 |
| Donjek-Spot 25  | 707  | 483474   | 1.1  | 9.4245  | 0.6 | 4.2237 | 1.3 | 0.2888 | 1.1 | 0.87 | 1635.7 | 15.9 | 1678.6 | 10.3 | 1732.8 | 11.2  |        |      |

|               |     |     |     |          |       |        |       |        |      |      |     |     |     |     |        |       |     |     |
|---------------|-----|-----|-----|----------|-------|--------|-------|--------|------|------|-----|-----|-----|-----|--------|-------|-----|-----|
| Drop-Spot 257 | 153 | 60  | 1.1 | 2.9091   | 24.3  | 0.0033 | 29.3  | 0.0001 | 16.3 | 0.56 | 0.5 | 0.1 | 3.4 | 1.0 | NA     | NA    | 0.5 | 0.1 |
| Drop-Spot 262 | 289 | 60  | 1.1 | 5.8669   | 38.0  | 0.0017 | 38.8  | 0.0001 | 7.6  | 0.20 | 0.5 | 0.0 | 1.7 | 0.7 | 2562.0 | 663.6 | 0.5 | 0.0 |
| Drop-Spot 130 | 252 | 60  | 1.3 | 3.1346   | 41.1  | 0.0032 | 41.9  | 0.0001 | 7.9  | 0.19 | 0.5 | 0.0 | 3.3 | 1.4 | 3565.1 | 667.7 | 0.5 | 0.0 |
| Drop-Spot 294 | 106 | 60  | 1.3 | 83.4926  | 868.0 | 0.0001 | 868.3 | 0.0001 | 20.0 | 0.02 | 0.5 | 0.1 | 0.1 | 1.1 | NA     | NA    | 0.5 | 0.1 |
| Drop-Spot 166 | 98  | 60  | 2.1 | 3.0437   | 3.5   | 0.0033 | 18.1  | 0.0001 | 17.8 | 0.98 | 0.5 | 0.1 | 3.4 | 0.6 | NA     | NA    | 0.5 | 0.1 |
| Drop-Spot 302 | 126 | 60  | 1.3 | 6.3404   | 95.3  | 0.0016 | 97.2  | 0.0001 | 19.4 | 0.20 | 0.5 | 0.1 | 1.6 | 1.6 | 2431.3 | NA    | 0.5 | 0.1 |
| Drop-Spot 245 | 76  | 60  | 2.0 | 2.9118   | 45.5  | 0.0035 | 53.1  | 0.0001 | 27.3 | 0.51 | 0.5 | 0.1 | 3.6 | 1.9 | NA     | NA    | 0.5 | 0.1 |
| Drop-Spot 98  | 73  | 60  | 1.9 | 26.6627  | 2.2   | 0.0004 | 23.3  | 0.0001 | 23.2 | 1.00 | 0.5 | 0.1 | 0.4 | 0.1 | NA     | NA    | 0.5 | 0.1 |
| Drop-Spot 265 | 101 | 60  | 2.2 | 2.9044   | 48.4  | 0.0036 | 52.0  | 0.0001 | 19.0 | 0.37 | 0.5 | 0.1 | 3.7 | 1.9 | NA     | NA    | 0.5 | 0.1 |
| Drop-Spot 64  | 187 | 60  | 1.7 | 13.5328  | 25.6  | 0.0008 | 28.5  | 0.0001 | 12.6 | 0.44 | 0.5 | 0.1 | 0.8 | 0.2 | 1038.6 | 524.6 | 0.5 | 0.1 |
| Drop-Spot 141 | 72  | 60  | 2.3 | 8.5330   | 14.2  | 0.0012 | 21.6  | 0.0001 | 16.3 | 0.75 | 0.5 | 0.1 | 1.3 | 0.3 | 1913.8 | 256.6 | 0.5 | 0.1 |
| Drop-Spot 49  | 134 | 60  | 1.3 | 69.7827  | 39.5  | 0.0002 | 43.8  | 0.0001 | 18.8 | 0.43 | 0.5 | 0.1 | 0.2 | 0.1 | NA     | NA    | 0.5 | 0.1 |
| Drop-Spot 41  | 112 | 60  | 1.9 | 8.3281   | 63.3  | 0.0013 | 65.0  | 0.0001 | 14.7 | 0.23 | 0.5 | 0.1 | 1.3 | 0.9 | 1957.3 | NA    | 0.5 | 0.1 |
| Drop-Spot 217 | 69  | 60  | 2.2 | 3.8788   | 30.2  | 0.0029 | 36.2  | 0.0001 | 19.9 | 0.55 | 0.5 | 0.1 | 2.9 | 1.0 | 3233.4 | 489.7 | 0.5 | 0.1 |
| Drop-Spot 99  | 85  | 60  | 1.4 | 3.1687   | 2.9   | 0.0035 | 18.5  | 0.0001 | 18.3 | 0.99 | 0.5 | 0.1 | 3.6 | 0.7 | 3548.5 | 44.0  | 0.5 | 0.1 |
| Drop-Spot 264 | 63  | 60  | 2.5 | 8.0887   | 85.2  | 0.0014 | 87.1  | 0.0001 | 17.9 | 0.21 | 0.5 | 0.1 | 1.4 | 1.2 | 2009.2 | NA    | 0.5 | 0.1 |
| Drop-Spot 205 | 122 | 60  | 1.8 | 5.6405   | 12.1  | 0.0020 | 17.4  | 0.0001 | 12.4 | 0.72 | 0.5 | 0.1 | 2.0 | 0.4 | 2627.7 | 202.7 | 0.5 | 0.1 |
| Drop-Spot 76  | 67  | 60  | 2.2 | 46.1155  | 4.0   | 0.0002 | 18.0  | 0.0001 | 17.6 | 0.97 | 0.5 | 0.1 | 0.2 | 0.0 | NA     | NA    | 0.5 | 0.1 |
| Drop-Spot 230 | 69  | 60  | 1.9 | 5.5240   | 10.9  | 0.0021 | 22.4  | 0.0001 | 19.6 | 0.87 | 0.5 | 0.1 | 2.1 | 0.5 | 2662.3 | 181.3 | 0.5 | 0.1 |
| Drop-Spot 170 | 105 | 60  | 1.6 | 3.2011   | 4.7   | 0.0036 | 16.0  | 0.0001 | 15.3 | 0.96 | 0.5 | 0.1 | 3.6 | 0.6 | 3532.8 | 72.2  | 0.5 | 0.1 |
| Drop-Spot 52  | 89  | 60  | 1.8 | 12.2100  | 43.6  | 0.0009 | 46.7  | 0.0001 | 16.7 | 0.36 | 0.5 | 0.1 | 1.0 | 0.4 | 1243.1 | 898.5 | 0.5 | 0.1 |
| Drop-Spot 68  | 101 | 60  | 2.1 | 3.0445   | 2.9   | 0.0038 | 16.1  | 0.0001 | 15.8 | 0.98 | 0.5 | 0.1 | 3.8 | 0.6 | NA     | NA    | 0.5 | 0.1 |
| Drop-Spot 293 | 145 | 60  | 1.8 | 3.0452   | 12.9  | 0.0038 | 18.7  | 0.0001 | 13.6 | 0.73 | 0.5 | 0.1 | 3.9 | 0.7 | NA     | NA    | 0.5 | 0.1 |
| Drop-Spot 75  | 116 | 60  | 1.8 | 4.8541   | 19.6  | 0.0024 | 25.0  | 0.0001 | 15.5 | 0.62 | 0.5 | 0.1 | 2.4 | 0.6 | 2874.4 | 321.8 | 0.5 | 0.1 |
| Drop-Spot 62  | 89  | 60  | 1.8 | 3.5755   | 8.1   | 0.0033 | 19.9  | 0.0001 | 18.1 | 0.91 | 0.5 | 0.1 | 3.3 | 0.7 | 3361.2 | 127.4 | 0.5 | 0.1 |
| Drop-Spot 222 | 89  | 332 | 2.1 | 2.1043   | 18.5  | 0.0056 | 30.6  | 0.0001 | 24.4 | 0.80 | 0.5 | 0.1 | 5.6 | 1.7 | NA     | NA    | 0.5 | 0.1 |
| Drop-Spot 46  | 149 | 60  | 1.4 | 11.2579  | 51.2  | 0.0010 | 52.8  | 0.0001 | 12.7 | 0.24 | 0.5 | 0.1 | 1.1 | 0.6 | 1400.4 | NA    | 0.5 | 0.1 |
| Drop-Spot 267 | 67  | 60  | 2.5 | 2.9044   | 29.2  | 0.0041 | 35.7  | 0.0001 | 20.6 | 0.58 | 0.6 | 0.1 | 4.1 | 1.5 | NA     | NA    | 0.6 | 0.1 |
| Drop-Spot 109 | 105 | 60  | 1.9 | 3.3784   | 70.9  | 0.0035 | 72.9  | 0.0001 | 17.0 | 0.23 | 0.6 | 0.1 | 3.6 | 2.6 | 3449.4 | NA    | 0.6 | 0.1 |
| Drop-Spot 271 | 126 | 60  | 2.1 | 3.0435   | 5.0   | 0.0039 | 16.5  | 0.0001 | 15.7 | 0.95 | 0.6 | 0.1 | 4.0 | 0.7 | NA     | NA    | 0.6 | 0.1 |
| Drop-Spot 55  | 60  | 60  | 2.4 | 2.8898   | 39.5  | 0.0041 | 47.0  | 0.0001 | 25.4 | 0.54 | 0.6 | 0.1 | 4.2 | 2.0 | NA     | NA    | 0.6 | 0.1 |
| Drop-Spot 89  | 65  | 60  | 1.9 | 3.3814   | 7.4   | 0.0035 | 16.8  | 0.0001 | 15.1 | 0.90 | 0.6 | 0.1 | 3.6 | 0.6 | 3448.0 | 115.0 | 0.6 | 0.1 |
| Drop-Spot 128 | 53  | 60  | 2.1 | 2.8793   | 21.5  | 0.0041 | 28.3  | 0.0001 | 18.4 | 0.65 | 0.6 | 0.1 | 4.2 | 1.2 | NA     | NA    | 0.6 | 0.1 |
| Drop-Spot 311 | 154 | 60  | 1.9 | 121.5429 | 30.8  | 0.0001 | 32.4  | 0.0001 | 10.1 | 0.31 | 0.6 | 0.1 | 0.1 | 0.0 | NA     | NA    | 0.6 | 0.1 |
| Drop-Spot 240 | 101 | 60  | 1.7 | 52.8465  | 9.3   | 0.0002 | 16.2  | 0.0001 | 13.3 | 0.82 | 0.6 | 0.1 | 0.2 | 0.0 | NA     | NA    | 0.6 | 0.1 |
| Drop-Spot 232 | 80  | 60  | 1.7 | 21.8192  | 38.3  | 0.0006 | 43.6  | 0.0001 | 20.8 | 0.48 | 0.6 | 0.1 | 0.6 | 0.2 | NA     | NA    | 0.6 | 0.1 |
| Drop-Spot 80  | 66  | 60  | 2.5 | 7.2280   | 21.8  | 0.0017 | 28.0  | 0.0001 | 17.7 | 0.63 | 0.6 | 0.1 | 1.7 | 0.5 | 2206.7 | 382.4 | 0.6 | 0.1 |
| Drop-Spot 190 | 95  | 60  | 2.0 | 3.0569   | 5.4   | 0.0040 | 14.3  | 0.0001 | 13.3 | 0.93 | 0.6 | 0.1 | 4.0 | 0.6 | NA     | NA    | 0.6 | 0.1 |
| Drop-Spot 162 | 60  | 60  | 2.3 | 10.1727  | 175.4 | 0.0012 | 176.3 | 0.0001 | 17.9 | 0.10 | 0.6 | 0.1 | 1.2 | 2.1 | 1592.1 | NA    | 0.6 | 0.1 |
| Drop-Spot 47  | 50  | 60  | 2.6 | 9.7282   | 24.6  | 0.0013 | 30.9  | 0.0001 | 18.6 | 0.60 | 0.6 | 0.1 | 1.3 | 0.4 | 1675.2 | 462.6 | 0.6 | 0.1 |
| Drop-Spot 239 | 95  | 60  | 1.8 | 3.9487   | 35.2  | 0.0031 | 39.4  | 0.0001 | 17.6 | 0.45 | 0.6 | 0.1 | 3.2 | 1.2 | 3205.2 | 578.2 | 0.6 | 0.1 |
| Drop-Spot 237 | 60  | 60  | 2.5 | 2.9120   | 23.1  | 0.0043 | 29.4  | 0.0001 | 18.2 | 0.62 | 0.6 | 0.1 | 4.3 | 1.3 | NA     | NA    | 0.6 | 0.1 |
| Drop-Spot 269 | 87  | 60  | 1.8 | 3.8599   | 10.8  | 0.0032 | 21.7  | 0.0001 | 18.9 | 0.87 | 0.6 | 0.1 | 3.3 | 0.7 | 3241.1 | 171.2 | 0.6 | 0.1 |
| Drop-Spot 220 | 124 | 60  | 1.3 | 3.7616   | 37.2  | 0.0033 | 39.8  | 0.0001 | 14.1 | 0.36 | 0.6 | 0.1 | 3.4 | 1.3 | 3281.7 | 609.0 | 0.6 | 0.1 |
| Drop-Spot 253 | 62  | 60  | 2.3 | 2.9099   | 39.2  | 0.0043 | 44.7  | 0.0001 | 21.6 | 0.48 | 0.6 | 0.1 | 4.4 | 1.9 | NA     | NA    | 0.6 | 0.1 |
| Drop-Spot 28  | 100 | 60  | 3.1 | 3.1148   | 6.3   | 0.0040 | 16.0  | 0.0001 | 14.7 | 0.92 | 0.6 | 0.1 | 4.1 | 0.7 | 3574.9 | 97.6  | 0.6 | 0.1 |
| Drop-Spot 255 | 96  | 60  | 1.6 | 21.6806  | 19.1  | 0.0006 | 25.5  | 0.0001 | 16.9 | 0.66 | 0.6 | 0.1 | 0.6 | 0.2 | 4.1    | 463.8 | 0.6 | 0.1 |
| Drop-Spot 156 | 279 | 60  | 1.4 | 4.6282   | 13.4  | 0.0027 | 16.1  | 0.0001 | 9.0  | 0.56 | 0.6 | 0.1 | 2.8 | 0.4 | 2951.6 | 217.2 | 0.6 | 0.1 |
| Drop-Spot 30  | 88  | 60  | 2.5 | 101.1835 | 37.5  | 0.0001 | 42.0  | 0.0001 | 19.1 | 0.45 | 0.6 | 0.1 | 0.1 | 0.1 | NA     | NA    | 0.6 | 0.1 |
| Drop-Spot 122 | 63  | 60  | 2.0 | 2.8884   | 50.0  | 0.0044 | 53.4  | 0.0001 | 18.9 | 0.35 | 0.6 | 0.1 | 4.4 | 2.4 | NA     | NA    | 0.6 | 0.1 |
| Drop-Spot 312 | 53  | 60  | 2.2 | 2.9070   | 33.8  | 0.0044 | 41.4  | 0.0001 | 23.9 | 0.58 | 0.6 | 0.1 | 4.4 | 1.8 | NA     | NA    | 0.6 | 0.1 |
| Drop-Spot 268 | 72  | 60  | 1.8 | 2.9005   | 50.0  | 0.0044 | 53.8  | 0.0001 | 19.8 | 0.37 | 0.6 | 0.1 | 4.4 | 2.4 | NA     | NA    | 0.6 | 0.1 |
| Drop-Spot 285 | 90  | 60  | 1.5 | 2.9027   | 44.1  | 0.0044 | 47.7  | 0.0001 | 18.3 | 0.38 | 0.6 | 0.1 | 4.4 | 2.1 | NA     | NA    | 0.6 | 0.1 |
| Drop-Spot 181 | 65  | 60  | 2.6 | 2.9123   | 39.9  | 0.0044 | 45.5  | 0.0001 | 21.9 | 0.48 | 0.6 | 0.1 | 4.5 | 2.0 | NA     | NA    | 0.6 | 0.1 |
| Drop-Spot 35  | 50  | 60  | 2.5 | 2.8785   | 53.7  | 0.0044 | 59.9  | 0.0001 | 26.7 | 0.44 | 0.6 | 0.2 | 4.5 | 2.7 | NA     | NA    | 0.6 | 0.2 |
| Drop-Spot 275 | 86  | 60  | 1.9 | 4.0372   | 21.5  | 0.0032 | 27.2  | 0.0001 | 16.6 | 0.61 | 0.6 | 0.1 | 3.2 | 0.9 | 3170.1 | 345.2 | 0.6 | 0.1 |
| Drop-Spot 14  | 199 | 121 | 1.5 | 21.3365  | 24.6  | 0.0006 | 26.3  | 0.0001 | 9.4  | 0.36 | 0.6 | 0.1 | 0.6 | 0.2 | 42.5   | 595.9 | 0.6 | 0.1 |
| Drop-Spot 147 | 73  | 60  | 1.8 | 3.0224   | 31.0  | 0.0043 | 36.4  | 0.0001 | 19.1 | 0.53 | 0.6 | 0.1 | 4.3 | 1.6 | NA     | NA    | 0.6 | 0.1 |
| Drop-Spot 247 | 92  | 60  | 1.9 | 5.1520   | 24.3  | 0.0025 | 29.5  | 0.0001 | 16.8 | 0.57 | 0.6 | 0.1 | 2.5 | 0.7 | 2777.2 | 405.2 | 0.6 | 0.1 |
| Drop-Spot 145 | 145 | 60  | 1.9 | 5.4391   | 45.1  | 0.0024 | 46.3  | 0.0001 | 10.6 | 0.23 | 0.6 | 0.1 | 2.4 | 1.1 | 2687.9 | 793.6 | 0.6 | 0.1 |
| Drop-Spot 142 | 64  | 60  | 2.8 | 3.0458   | 5.6   | 0.0042 | 20.2  | 0.0001 | 19.4 | 0.96 | 0.6 | 0.1 | 4.3 | 0.9 | 3609.2 | 86.3  | 0.6 | 0.1 |
| Drop-Spot 60  | 92  | 60  | 3.2 | 2.8921   | 50.0  | 0.0045 | 54.3  | 0.0001 | 21.1 | 0.39 | 0.6 | 0.1 | 4.5 | 2.5 | NA     | NA    | 0.6 | 0.1 |
| Drop-Spot 131 | 60  | 60  | 1.9 | 3.5775   | 29.4  | 0.0036 | 34.2  | 0.0001 | 17.5 | 0.51 | 0.6 | 0.1 | 3.7 | 1.3 | 3360.3 | 472.0 | 0.6 | 0.1 |
| Drop-Spot 164 | 102 | 60  | 2.7 | 6.8471   | 21.7  | 0.0019 | 25.6  | 0.0001 | 13.7 | 0.53 | 0.6 | 0.1 | 1.9 | 0.5 | 2300.1 | 377.1 | 0.6 | 0.1 |
| Drop-Spot 13  | 128 | 60  | 1.3 | 3.0279   | 5.1   | 0.0043 | 12.8  | 0.0001 | 11.7 | 0.92 | 0.6 | 0.1 | 4.4 | 0.6 | 3618.3 | 78.0  | 0.6 | 0.1 |
| Drop-Spot 189 | 94  | 60  | 1.8 | 3.7516   | 6.8   | 0.0035 | 16.5  | 0.0001 | 15.0 | 0.91 | 0.6 | 0.1 | 3.5 | 0.6 | 3285.9 | 107.3 | 0.6 | 0.1 |
| Drop-Spot 10  | 62  | 60  | 2.3 | 7.9487   | 27.9  | 0.0017 | 33.3  | 0.0001 | 18.2 | 0.55 | 0.6 | 0.1 | 1.7 | 0.6 | 2040.2 | 503.9 | 0.6 | 0.1 |
| Drop-Spot 184 | 48  | 60  | 2.9 | 2.9091   | 8.6   | 0.0046 | 23.3  | 0.0001 | 21.6 | 0.93 | 0.6 | 0.1 | 4.6 | 1.1 | NA     | NA    | 0.6 | 0.1 |
| Drop-Spot 154 | 51  | 60  | 2.6 | 2.9016   | 11.8  | 0.0046 | 25.5  | 0.0001 | 22.5 | 0.89 | 0.6 | 0.1 | 4.6 | 1.2 | NA     | NA    | 0.6 | 0.1 |
| Drop-Spot 2   | 63  | 60  | 1.8 | 2.8802   | 40.3  | 0.0046 | 44.5  | 0.0001 | 19.0 | 0.43 | 0.6 | 0.1 | 4.7 | 2.1 | NA     | NA    | 0.6 | 0.1 |
| Drop-Spot 9   | 61  | 60  | 2.5 | 3.0065   | 2.4   | 0.0044 | 23.5  | 0.0001 | 23.3 | 0.99 | 0.6 | 0.1 | 4.5 | 1.1 | NA     | NA    | 0.6 | 0.1 |
| Drop-Spot 308 | 83  | 60  | 2.1 | 2.9024   | 51.3  | 0.0046 | 55.1  | 0.0001 | 20.1 | 0.37 | 0.6 | 0.1 | 4.7 |     |        |       |     |     |

|               |     |       |     |          |      |        |      |        |      |      |     |     |     |     |        |       |     |     |
|---------------|-----|-------|-----|----------|------|--------|------|--------|------|------|-----|-----|-----|-----|--------|-------|-----|-----|
| Drop-Spot 216 | 54  | 60    | 2.5 | 3.0461   | 3.7  | 0.0045 | 20.3 | 0.0001 | 20.0 | 0.98 | 0.6 | 0.1 | 4.6 | 0.9 | NA     | NA    | 0.6 | 0.1 |
| Drop-Spot 92  | 58  | 60    | 2.2 | 2.9063   | 38.9 | 0.0047 | 43.0 | 0.0001 | 18.3 | 0.42 | 0.6 | 0.1 | 4.8 | 2.0 | NA     | NA    | 0.6 | 0.1 |
| Drop-Spot 284 | 64  | 60    | 1.9 | 3.1699   | 55.8 | 0.0043 | 59.0 | 0.0001 | 19.3 | 0.33 | 0.6 | 0.1 | 4.4 | 2.6 | 3547.9 | NA    | 0.6 | 0.1 |
| Drop-Spot 214 | 64  | 60    | 2.3 | 3.2454   | 5.1  | 0.0042 | 18.8 | 0.0001 | 18.1 | 0.96 | 0.6 | 0.1 | 4.3 | 0.8 | 3511.6 | 78.8  | 0.6 | 0.1 |
| Drop-Spot 161 | 74  | 60    | 1.8 | 2.9009   | 52.0 | 0.0048 | 55.5 | 0.0001 | 19.4 | 0.35 | 0.6 | 0.1 | 4.8 | 2.7 | NA     | NA    | 0.6 | 0.1 |
| Drop-Spot 235 | 66  | 60    | 3.1 | 3.4821   | 2.5  | 0.0040 | 19.8 | 0.0001 | 19.6 | 0.99 | 0.7 | 0.1 | 4.0 | 0.8 | 3402.4 | 39.3  | 0.7 | 0.1 |
| Drop-Spot 289 | 61  | 60    | 2.1 | 3.0458   | 44.9 | 0.0046 | 48.7 | 0.0001 | 19.0 | 0.39 | 0.7 | 0.1 | 4.7 | 2.3 | NA     | NA    | 0.7 | 0.1 |
| Drop-Spot 38  | 100 | 60    | 2.5 | 15.6210  | 42.4 | 0.0009 | 45.4 | 0.0001 | 16.3 | 0.36 | 0.7 | 0.1 | 0.9 | 0.4 | 742.2  | 937.2 | 0.7 | 0.1 |
| Drop-Spot 259 | 117 | 306   | 1.7 | 6.7559   | 24.2 | 0.0021 | 29.0 | 0.0001 | 18.0 | 0.55 | 0.7 | 0.1 | 2.1 | 0.6 | 2323.1 | 422.3 | 0.7 | 0.1 |
| Drop-Spot 315 | 55  | 60    | 2.7 | 2.9041   | 50.0 | 0.0049 | 55.3 | 0.0001 | 23.6 | 0.43 | 0.7 | 0.2 | 5.0 | 2.8 | NA     | NA    | 0.7 | 0.2 |
| Drop-Spot 119 | 99  | 60    | 1.8 | 2.8926   | 56.4 | 0.0050 | 58.9 | 0.0001 | 17.0 | 0.29 | 0.7 | 0.1 | 5.0 | 3.0 | NA     | NA    | 0.7 | 0.1 |
| Drop-Spot 173 | 54  | 60    | 2.5 | 6.6231   | 23.0 | 0.0022 | 27.6 | 0.0001 | 15.2 | 0.55 | 0.7 | 0.1 | 2.2 | 0.6 | 2357.1 | 399.5 | 0.7 | 0.1 |
| Drop-Spot 301 | 215 | 60    | 1.6 | 3.0412   | 5.6  | 0.0047 | 10.7 | 0.0001 | 9.2  | 0.85 | 0.7 | 0.1 | 4.8 | 0.5 | NA     | NA    | 0.7 | 0.1 |
| Drop-Spot 6   | 53  | 60    | 2.4 | 2.8775   | 50.0 | 0.0050 | 57.3 | 0.0001 | 28.0 | 0.49 | 0.7 | 0.2 | 5.1 | 2.9 | NA     | NA    | 0.7 | 0.2 |
| Drop-Spot 96  | 88  | 60    | 1.8 | 4.2720   | 14.5 | 0.0034 | 19.3 | 0.0001 | 12.8 | 0.66 | 0.7 | 0.1 | 3.5 | 0.7 | 3080.2 | 232.9 | 0.7 | 0.1 |
| Drop-Spot 73  | 109 | 60    | 2.0 | 14.2815  | 27.3 | 0.0010 | 30.0 | 0.0001 | 12.4 | 0.41 | 0.7 | 0.1 | 1.0 | 0.3 | 929.0  | 571.6 | 0.7 | 0.1 |
| Drop-Spot 32  | 54  | 60    | 2.5 | 2.8746   | 22.7 | 0.0051 | 28.6 | 0.0001 | 17.4 | 0.61 | 0.7 | 0.1 | 5.2 | 1.5 | NA     | NA    | 0.7 | 0.1 |
| Drop-Spot 279 | 70  | 60    | 2.0 | 3.8318   | 10.1 | 0.0038 | 18.3 | 0.0001 | 15.2 | 0.83 | 0.7 | 0.1 | 3.9 | 0.7 | 3252.6 | 160.2 | 0.7 | 0.1 |
| Drop-Spot 16  | 61  | 60    | 2.7 | 5.7299   | 12.3 | 0.0026 | 22.6 | 0.0001 | 19.0 | 0.84 | 0.7 | 0.1 | 2.6 | 0.6 | 2601.5 | 205.0 | 0.7 | 0.1 |
| Drop-Spot 105 | 59  | 60    | 2.1 | 2.9050   | 14.6 | 0.0051 | 20.6 | 0.0001 | 14.5 | 0.70 | 0.7 | 0.1 | 5.2 | 1.1 | NA     | NA    | 0.7 | 0.1 |
| Drop-Spot 207 | 53  | 60    | 2.4 | 2.9143   | 47.0 | 0.0051 | 51.5 | 0.0001 | 21.0 | 0.41 | 0.7 | 0.1 | 5.2 | 2.7 | NA     | NA    | 0.7 | 0.1 |
| Drop-Spot 290 | 49  | 60    | 2.4 | 2.9053   | 7.7  | 0.0051 | 20.4 | 0.0001 | 18.9 | 0.93 | 0.7 | 0.1 | 5.2 | 1.1 | NA     | NA    | 0.7 | 0.1 |
| Drop-Spot 136 | 61  | 60    | 2.2 | 3.0172   | 1.3  | 0.0049 | 19.3 | 0.0001 | 19.3 | 1.00 | 0.7 | 0.1 | 5.0 | 1.0 | NA     | NA    | 0.7 | 0.1 |
| Drop-Spot 53  | 59  | 60    | 1.9 | 3.9764   | 80.1 | 0.0038 | 82.6 | 0.0001 | 19.9 | 0.24 | 0.7 | 0.1 | 3.8 | 3.1 | 3194.1 | NA    | 0.7 | 0.1 |
| Drop-Spot 186 | 55  | 60    | 2.6 | 3.0536   | 12.0 | 0.0049 | 25.7 | 0.0001 | 22.7 | 0.88 | 0.7 | 0.2 | 5.0 | 1.3 | NA     | NA    | 0.7 | 0.2 |
| Drop-Spot 223 | 63  | 60    | 2.2 | 9.4402   | 22.0 | 0.0016 | 29.4 | 0.0001 | 19.4 | 0.66 | 0.7 | 0.1 | 1.6 | 0.5 | 1730.5 | 408.7 | 0.7 | 0.1 |
| Drop-Spot 283 | 54  | 60    | 2.6 | 3.5557   | 7.3  | 0.0042 | 18.9 | 0.0001 | 17.4 | 0.92 | 0.7 | 0.1 | 4.3 | 0.8 | 3369.8 | 113.8 | 0.7 | 0.1 |
| Drop-Spot 144 | 45  | 60    | 2.6 | 8.0764   | 43.9 | 0.0019 | 47.8 | 0.0001 | 19.0 | 0.40 | 0.7 | 0.1 | 1.9 | 0.9 | 2011.9 | 823.7 | 0.7 | 0.1 |
| Drop-Spot 40  | 499 | 485   | 1.0 | 15.1470  | 20.5 | 0.0010 | 21.3 | 0.0001 | 6.0  | 0.28 | 0.7 | 0.0 | 1.0 | 0.2 | 807.0  | 432.6 | 0.7 | 0.0 |
| Drop-Spot 238 | 66  | 60    | 2.5 | 3.2450   | 6.4  | 0.0047 | 20.1 | 0.0001 | 19.1 | 0.95 | 0.7 | 0.1 | 4.7 | 1.0 | 3511.8 | 98.8  | 0.7 | 0.1 |
| Drop-Spot 276 | 60  | 60    | 1.8 | 75.6916  | 30.3 | 0.0002 | 36.1 | 0.0001 | 19.7 | 0.55 | 0.7 | 0.1 | 0.2 | 0.1 | NA     | NA    | 0.7 | 0.1 |
| Drop-Spot 313 | 160 | 60    | 1.3 | 4.1037   | 11.7 | 0.0037 | 15.5 | 0.0001 | 10.1 | 0.65 | 0.7 | 0.1 | 3.8 | 0.6 | 3144.2 | 187.3 | 0.7 | 0.1 |
| Drop-Spot 67  | 69  | 60    | 2.3 | 3.6737   | 6.1  | 0.0042 | 20.3 | 0.0001 | 19.3 | 0.95 | 0.7 | 0.1 | 4.2 | 0.9 | 3318.8 | 95.9  | 0.7 | 0.1 |
| Drop-Spot 291 | 64  | 60    | 2.6 | 2.9053   | 8.7  | 0.0053 | 20.1 | 0.0001 | 18.1 | 0.90 | 0.7 | 0.1 | 5.3 | 1.1 | NA     | NA    | 0.7 | 0.1 |
| Drop-Spot 228 | 73  | 60    | 2.2 | 8.1838   | 8.8  | 0.0019 | 16.6 | 0.0001 | 14.0 | 0.85 | 0.7 | 0.1 | 1.9 | 0.3 | 1988.5 | 157.5 | 0.7 | 0.1 |
| Drop-Spot 226 | 77  | 60    | 2.1 | 12.4844  | 84.1 | 0.0012 | 85.7 | 0.0001 | 16.2 | 0.19 | 0.7 | 0.1 | 1.2 | 1.1 | 1199.4 | NA    | 0.7 | 0.1 |
| Drop-Spot 37  | 92  | 60    | 1.8 | 3.8943   | 8.1  | 0.0040 | 17.4 | 0.0001 | 15.4 | 0.89 | 0.7 | 0.1 | 4.0 | 0.7 | 3227.1 | 127.9 | 0.7 | 0.1 |
| Drop-Spot 249 | 58  | 60    | 2.4 | 6.9160   | 36.1 | 0.0022 | 39.2 | 0.0001 | 15.4 | 0.39 | 0.7 | 0.1 | 2.3 | 0.9 | 2282.9 | 644.1 | 0.7 | 0.1 |
| Drop-Spot 206 | 85  | 60    | 1.9 | 6.4325   | 48.4 | 0.0024 | 50.4 | 0.0001 | 13.9 | 0.28 | 0.7 | 0.1 | 2.4 | 1.2 | 2406.9 | 883.4 | 0.7 | 0.1 |
| Drop-Spot 88  | 38  | 60    | 2.6 | 2.9083   | 43.8 | 0.0054 | 50.5 | 0.0001 | 25.2 | 0.50 | 0.7 | 0.2 | 5.4 | 2.7 | NA     | NA    | 0.7 | 0.2 |
| Drop-Spot 61  | 892 | 546   | 0.8 | 53.0721  | 12.0 | 0.0003 | 12.8 | 0.0001 | 4.3  | 0.34 | 0.7 | 0.0 | 0.3 | 0.0 | NA     | NA    | 0.7 | 0.0 |
| Drop-Spot 1   | 64  | 80    | 2.1 | 21.4752  | 19.6 | 0.0007 | 27.9 | 0.0001 | 19.9 | 0.71 | 0.7 | 0.1 | 0.7 | 0.2 | 27.0   | 473.6 | 0.7 | 0.1 |
| Drop-Spot 24  | 57  | 60    | 1.7 | 3.2794   | 18.4 | 0.0048 | 26.4 | 0.0001 | 19.0 | 0.72 | 0.7 | 0.1 | 4.8 | 1.3 | 3495.5 | 286.7 | 0.7 | 0.1 |
| Drop-Spot 51  | 52  | 60    | 2.5 | 11.2874  | 78.5 | 0.0014 | 77.9 | 0.0001 | 14.3 | 0.18 | 0.7 | 0.1 | 1.4 | 1.1 | 1395.4 | NA    | 0.7 | 0.1 |
| Drop-Spot 231 | 48  | 60    | 2.6 | 2.9065   | 8.2  | 0.0054 | 25.9 | 0.0001 | 24.6 | 0.95 | 0.7 | 0.2 | 5.5 | 1.4 | NA     | NA    | 0.7 | 0.2 |
| Drop-Spot 57  | 46  | 60    | 2.2 | 2.8896   | 39.9 | 0.0054 | 45.5 | 0.0001 | 22.0 | 0.48 | 0.7 | 0.2 | 5.5 | 2.5 | NA     | NA    | 0.7 | 0.2 |
| Drop-Spot 159 | 72  | 264   | 2.0 | 12.0541  | 12.5 | 0.0013 | 22.6 | 0.0001 | 18.9 | 0.83 | 0.7 | 0.1 | 1.3 | 0.3 | 1268.3 | 244.1 | 0.7 | 0.1 |
| Drop-Spot 266 | 144 | 488   | 1.0 | 4.6767   | 11.0 | 0.0034 | 21.3 | 0.0001 | 18.3 | 0.86 | 0.7 | 0.1 | 3.4 | 0.7 | 2934.8 | 177.9 | 0.7 | 0.1 |
| Drop-Spot 83  | 49  | 60    | 2.6 | 2.9106   | 50.0 | 0.0055 | 54.2 | 0.0001 | 20.9 | 0.39 | 0.8 | 0.2 | 5.6 | 3.0 | NA     | NA    | 0.8 | 0.2 |
| Drop-Spot 18  | 129 | 136   | 1.4 | 21.6211  | 62.9 | 0.0007 | 63.4 | 0.0001 | 8.2  | 0.13 | 0.8 | 0.1 | 0.8 | 0.5 | 10.7   | NA    | 0.8 | 0.1 |
| Drop-Spot 280 | 163 | 433   | 1.5 | 17.1844  | 10.7 | 0.0009 | 15.1 | 0.0001 | 10.7 | 0.71 | 0.8 | 0.1 | 1.0 | 0.1 | 537.0  | 235.4 | 0.8 | 0.1 |
| Drop-Spot 77  | 74  | 77065 | 1.9 | 4.0952   | 22.4 | 0.0040 | 28.4 | 0.0001 | 17.4 | 0.61 | 0.8 | 0.1 | 4.0 | 1.1 | 3147.5 | 361.3 | 0.8 | 0.1 |
| Drop-Spot 90  | 62  | 60    | 2.6 | 6.4867   | 32.4 | 0.0025 | 38.0 | 0.0001 | 19.8 | 0.52 | 0.8 | 0.2 | 2.6 | 1.0 | 2392.6 | 568.4 | 0.8 | 0.2 |
| Drop-Spot 79  | 70  | 60    | 2.1 | 2.9121   | 45.8 | 0.0056 | 49.4 | 0.0001 | 18.6 | 0.38 | 0.8 | 0.1 | 5.7 | 2.8 | NA     | NA    | 0.8 | 0.1 |
| Drop-Spot 115 | 48  | 60    | 2.6 | 227.1305 | 5.5  | 0.0001 | 18.4 | 0.0001 | 17.6 | 0.95 | 0.8 | 0.1 | 0.1 | 0.0 | NA     | NA    | 0.8 | 0.1 |
| Drop-Spot 157 | 87  | 60    | 1.5 | 3.0605   | 39.3 | 0.0054 | 42.0 | 0.0001 | 14.9 | 0.35 | 0.8 | 0.1 | 5.4 | 2.3 | 3601.9 | 632.4 | 0.8 | 0.1 |
| Drop-Spot 210 | 131 | 250   | 2.3 | 31.7747  | 4.1  | 0.0005 | 12.1 | 0.0001 | 11.4 | 0.94 | 0.8 | 0.1 | 0.5 | 0.1 | NA     | NA    | 0.8 | 0.1 |
| Drop-Spot 133 | 62  | 60    | 2.1 | 8.7515   | 29.9 | 0.0019 | 34.8 | 0.0001 | 17.8 | 0.51 | 0.8 | 0.1 | 1.9 | 0.7 | 1868.3 | 551.7 | 0.8 | 0.1 |
| Drop-Spot 236 | 59  | 60    | 2.3 | 2.9120   | 50.0 | 0.0057 | 53.3 | 0.0001 | 18.4 | 0.35 | 0.8 | 0.1 | 5.8 | 3.1 | NA     | NA    | 0.8 | 0.1 |
| Drop-Spot 23  | 44  | 60    | 2.8 | 2.8756   | 34.0 | 0.0058 | 41.1 | 0.0001 | 23.2 | 0.56 | 0.8 | 0.2 | 5.9 | 2.4 | NA     | NA    | 0.8 | 0.2 |
| Drop-Spot 310 | 69  | 60    | 2.0 | 10.7660  | 21.1 | 0.0016 | 25.9 | 0.0001 | 15.1 | 0.58 | 0.8 | 0.1 | 1.6 | 0.4 | 1485.5 | 403.4 | 0.8 | 0.1 |
| Drop-Spot 120 | 85  | 60    | 2.0 | 14.0791  | 21.1 | 0.0012 | 25.6 | 0.0001 | 14.4 | 0.56 | 0.8 | 0.1 | 1.2 | 0.3 | 958.2  | 436.7 | 0.8 | 0.1 |
| Drop-Spot 126 | 63  | 60    | 1.6 | 7.6796   | 17.0 | 0.0022 | 24.6 | 0.0001 | 17.8 | 0.72 | 0.8 | 0.1 | 2.2 | 0.5 | 2100.9 | 300.0 | 0.8 | 0.1 |
| Drop-Spot 42  | 140 | 252   | 1.7 | 8.0878   | 19.9 | 0.0021 | 25.0 | 0.0001 | 15.0 | 0.60 | 0.8 | 0.1 | 2.1 | 0.5 | 2009.4 | 357.5 | 0.8 | 0.1 |
| Drop-Spot 19  | 56  | 60    | 2.3 | 2.8756   | 38.0 | 0.0059 | 39.9 | 0.0001 | 12.3 | 0.31 | 0.8 | 0.1 | 6.0 | 2.4 | NA     | NA    | 0.8 | 0.1 |
| Drop-Spot 139 | 49  | 60    | 2.8 | 48.2217  | 5.0  | 0.0004 | 20.9 | 0.0001 | 20.3 | 0.97 | 0.8 | 0.2 | 0.4 | 0.1 | NA     | NA    | 0.8 | 0.2 |
| Drop-Spot 65  | 33  | 60    | 2.7 | 10.0702  | 47.1 | 0.0017 | 51.0 | 0.0001 | 19.6 | 0.38 | 0.8 | 0.2 | 1.7 | 0.9 | 1611.0 | 933.3 | 0.8 | 0.2 |
| Drop-Spot 103 | 52  | 60    | 2.4 | 3.7312   | 4.3  | 0.0046 | 17.5 | 0.0001 | 17.0 | 0.97 | 0.8 | 0.1 | 4.6 | 0.8 | 3294.4 | 67.5  | 0.8 | 0.1 |
| Drop-Spot 8   | 50  | 60    | 2.6 | 2.8775   | 55.8 | 0.0060 | 59.0 | 0.0001 | 19.3 | 0.33 | 0.8 | 0.2 | 6.0 | 3.6 | NA     | NA    | 0.8 | 0.2 |
| Drop-Spot 182 | 51  | 60    | 2.3 | 3.2560   | 2.9  | 0.0053 | 16.0 | 0.0001 | 15.8 | 0.98 | 0.8 | 0.1 | 5.3 | 0.9 | 3506.5 | 44.8  | 0.8 | 0.1 |
| Drop-Spot 113 | 67  | 60    | 2.3 | 3.7082   | 47.7 | 0.0046 | 50.6 | 0.0001 | 16.9 | 0.33 | 0.8 | 0.1 | 4.7 | 2.4 | 3304.1 | 805.6 | 0.8 | 0.1 |
| Drop-Spot 250 | 243 | 295   | 1.7 | 12.1162  | 20.0 | 0.0014 | 22.2 | 0.0001 | 9.7  |      |     |     |     |     |        |       |     |     |

|               |     |       |     |         |       |        |       |        |      |      |      |     |      |      |        |        |      |     |
|---------------|-----|-------|-----|---------|-------|--------|-------|--------|------|------|------|-----|------|------|--------|--------|------|-----|
| Drop-Spot 304 | 100 | 60    | 1.9 | 75.7682 | 30.0  | 0.0002 | 32.4  | 0.0001 | 12.2 | 0.38 | 0.8  | 0.1 | 0.2  | 0.1  | NA     | NA     | 0.8  | 0.1 |
| Drop-Spot 31  | 63  | 60    | 2.1 | 7.7351  | 8.6   | 0.0023 | 17.8  | 0.0001 | 15.6 | 0.88 | 0.8  | 0.1 | 2.4  | 0.4  | 2088.2 | 151.5  | 0.8  | 0.1 |
| Drop-Spot 209 | 54  | 60    | 2.4 | 2.9075  | 50.0  | 0.0062 | 53.8  | 0.0001 | 19.8 | 0.37 | 0.8  | 0.2 | 6.3  | 3.4  | NA     | NA     | 0.8  | 0.2 |
| Drop-Spot 165 | 161 | 60    | 1.7 | 3.5626  | 25.1  | 0.0051 | 26.7  | 0.0001 | 9.1  | 0.34 | 0.9  | 0.1 | 5.2  | 1.4  | 3366.8 | 398.7  | 0.9  | 0.1 |
| Drop-Spot 127 | 54  | 60    | 2.4 | 3.0186  | 3.0   | 0.0061 | 17.9  | 0.0001 | 17.6 | 0.99 | 0.9  | 0.2 | 6.1  | 1.1  | NA     | NA     | 0.9  | 0.2 |
| Drop-Spot 123 | 68  | 60    | 2.1 | 2.8884  | 50.2  | 0.0064 | 53.3  | 0.0001 | 18.0 | 0.34 | 0.9  | 0.2 | 6.5  | 3.4  | NA     | NA     | 0.9  | 0.2 |
| Drop-Spot 43  | 39  | 60    | 1.9 | 3.8687  | 60.2  | 0.0048 | 63.0  | 0.0001 | 18.7 | 0.30 | 0.9  | 0.2 | 4.8  | 3.0  | 3237.5 | NA     | 0.9  | 0.2 |
| Drop-Spot 101 | 66  | 488   | 2.3 | 4.3055  | 7.6   | 0.0043 | 18.0  | 0.0001 | 16.3 | 0.91 | 0.9  | 0.1 | 4.4  | 0.8  | 3067.7 | 121.9  | 0.9  | 0.1 |
| Drop-Spot 258 | 63  | 60    | 2.1 | 4.6891  | 18.7  | 0.0040 | 22.7  | 0.0001 | 15.5 | 0.68 | 0.9  | 0.1 | 4.0  | 0.9  | 2930.5 | 271.5  | 0.9  | 0.1 |
| Drop-Spot 194 | 41  | 60    | 2.6 | 6.3474  | 22.1  | 0.0029 | 29.5  | 0.0001 | 19.6 | 0.66 | 0.9  | 0.2 | 3.0  | 0.9  | 2429.5 | 379.3  | 0.9  | 0.2 |
| Drop-Spot 69  | 52  | 60    | 2.5 | 2.9796  | 22.0  | 0.0063 | 25.0  | 0.0001 | 11.8 | 0.47 | 0.9  | 0.1 | 6.4  | 1.6  | 3642.9 | 341.7  | 0.9  | 0.1 |
| Drop-Spot 106 | 58  | 60    | 2.4 | 3.3215  | 5.3   | 0.0056 | 14.3  | 0.0001 | 13.2 | 0.93 | 0.9  | 0.1 | 5.7  | 0.8  | 3475.7 | 82.6   | 0.9  | 0.1 |
| Drop-Spot 243 | 274 | 1672  | 1.5 | 41.7008 | 4.5   | 0.0004 | 8.6   | 0.0001 | 7.3  | 0.85 | 0.9  | 0.1 | 0.5  | 0.0  | NA     | NA     | 0.9  | 0.1 |
| Drop-Spot 292 | 56  | 244   | 2.0 | 2.3322  | 50.0  | 0.0081 | 53.5  | 0.0001 | 18.9 | 0.35 | 0.9  | 0.2 | 8.1  | 4.3  | 4013.2 | NA     | 0.9  | 0.2 |
| Drop-Spot 108 | 59  | 60    | 2.4 | 6.7255  | 19.8  | 0.0028 | 25.0  | 0.0001 | 15.2 | 0.61 | 0.9  | 0.1 | 2.8  | 0.7  | 2330.9 | 343.6  | 0.9  | 0.1 |
| Drop-Spot 314 | 49  | 60    | 2.6 | 4.5060  | 6.9   | 0.0042 | 17.3  | 0.0001 | 15.9 | 0.92 | 0.9  | 0.1 | 4.3  | 0.7  | 2994.7 | 110.5  | 0.9  | 0.1 |
| Drop-Spot 218 | 64  | 60    | 2.2 | 2.9076  | 51.1  | 0.0065 | 54.3  | 0.0001 | 18.6 | 0.34 | 0.9  | 0.2 | 6.6  | 3.6  | NA     | NA     | 0.9  | 0.2 |
| Drop-Spot 281 | 53  | 60    | 2.7 | 13.6929 | 67.5  | 0.0014 | 69.2  | 0.0001 | 15.4 | 0.22 | 0.9  | 0.1 | 1.4  | 1.0  | 1014.8 | NA     | 0.9  | 0.1 |
| Drop-Spot 287 | 143 | 337   | 1.8 | 3.6271  | 35.5  | 0.0052 | 36.4  | 0.0001 | 8.2  | 0.23 | 0.9  | 0.1 | 5.3  | 1.9  | 3338.8 | 576.8  | 0.9  | 0.1 |
| Drop-Spot 288 | 133 | 606   | 1.0 | 4.5223  | 24.0  | 0.0042 | 28.6  | 0.0001 | 15.6 | 0.55 | 0.9  | 0.1 | 4.3  | 1.2  | 2988.9 | 392.3  | 0.9  | 0.1 |
| Drop-Spot 137 | 39  | 60    | 2.7 | 3.0172  | 3.6   | 0.0064 | 20.7  | 0.0001 | 20.3 | 0.98 | 0.9  | 0.2 | 6.5  | 1.3  | NA     | NA     | 0.9  | 0.2 |
| Drop-Spot 277 | 229 | 1656  | 1.4 | 6.9030  | 19.4  | 0.0028 | 21.6  | 0.0001 | 9.5  | 0.44 | 0.9  | 0.1 | 2.9  | 0.6  | 2286.1 | 336.5  | 0.9  | 0.1 |
| Drop-Spot 17  | 67  | 50946 | 2.7 | 6.5661  | 21.2  | 0.0030 | 27.3  | 0.0001 | 17.2 | 0.63 | 0.9  | 0.2 | 3.0  | 0.8  | 2371.9 | 365.4  | 0.9  | 0.2 |
| Drop-Spot 261 | 58  | 60    | 2.1 | 6.1974  | 28.0  | 0.0032 | 29.3  | 0.0001 | 13.4 | 0.46 | 0.9  | 0.1 | 3.2  | 0.9  | 2469.9 | 448.2  | 0.9  | 0.1 |
| Drop-Spot 82  | 61  | 698   | 2.4 | 2.0591  | 50.0  | 0.0096 | 54.1  | 0.0001 | 20.7 | 0.38 | 0.9  | 0.2 | 9.7  | 5.2  | NA     | NA     | 0.9  | 0.2 |
| Drop-Spot 27  | 62  | 461   | 2.2 | 2.0561  | 45.4  | 0.0097 | 48.2  | 0.0001 | 16.4 | 0.34 | 0.9  | 0.2 | 9.8  | 4.7  | NA     | NA     | 0.9  | 0.2 |
| Drop-Spot 124 | 53  | 1033  | 2.4 | 8.9178  | 14.1  | 0.0022 | 22.6  | 0.0001 | 17.7 | 0.78 | 0.9  | 0.2 | 2.3  | 0.5  | 1834.3 | 256.3  | 0.9  | 0.2 |
| Drop-Spot 148 | 65  | 60    | 2.2 | 4.9269  | 62.4  | 0.0041 | 65.0  | 0.0001 | 18.1 | 0.28 | 0.9  | 0.2 | 4.1  | 2.7  | 2850.2 | NA     | 0.9  | 0.2 |
| Drop-Spot 151 | 53  | 60    | 2.1 | 6.1325  | 7.3   | 0.0033 | 19.0  | 0.0001 | 17.6 | 0.92 | 0.9  | 0.2 | 3.3  | 0.6  | 2487.7 | 122.9  | 0.9  | 0.2 |
| Drop-Spot 39  | 72  | 309   | 2.1 | 6.2048  | 7.5   | 0.0033 | 19.9  | 0.0001 | 18.4 | 0.93 | 0.9  | 0.2 | 3.3  | 0.7  | 2467.9 | 126.2  | 0.9  | 0.2 |
| Drop-Spot 138 | 60  | 60    | 2.4 | 3.4036  | 20.7  | 0.0061 | 27.1  | 0.0002 | 17.4 | 0.64 | 1.0  | 0.2 | 6.2  | 1.7  | 3437.9 | 325.7  | 1.0  | 0.2 |
| Drop-Spot 4   | 97  | 60    | 1.1 | 2.8802  | 45.8  | 0.0072 | 49.6  | 0.0002 | 19.0 | 0.38 | 1.0  | 0.2 | 7.3  | 3.6  | NA     | NA     | 1.0  | 0.2 |
| Drop-Spot 201 | 59  | 354   | 2.3 | 32.4733 | 9.6   | 0.0006 | 19.5  | 0.0002 | 17.0 | 0.87 | 1.0  | 0.2 | 0.7  | 0.1  | NA     | NA     | 1.0  | 0.2 |
| Drop-Spot 5   | 46  | 60    | 2.0 | 3.2007  | 39.4  | 0.0066 | 42.7  | 0.0002 | 16.6 | 0.39 | 1.0  | 0.2 | 6.7  | 2.9  | 3533.0 | 637.5  | 1.0  | 0.2 |
| Drop-Spot 87  | 81  | 301   | 2.0 | 6.0511  | 19.5  | 0.0035 | 27.8  | 0.0002 | 19.9 | 0.71 | 1.0  | 0.2 | 3.6  | 1.0  | 2510.2 | 331.6  | 1.0  | 0.2 |
| Drop-Spot 3   | 54  | 142   | 2.0 | 21.6766 | 73.7  | 0.0010 | 76.2  | 0.0002 | 19.6 | 0.26 | 1.0  | 0.2 | 1.0  | 0.8  | 4.5    | NA     | 1.0  | 0.2 |
| Drop-Spot 66  | 103 | 60    | 1.4 | 2.9020  | 10.4  | 0.0076 | 15.4  | 0.0002 | 11.3 | 0.74 | 1.0  | 0.1 | 7.7  | 1.2  | NA     | NA     | 1.0  | 0.1 |
| Drop-Spot 34  | 62  | 60    | 1.8 | 12.6090 | 26.7  | 0.0018 | 31.9  | 0.0002 | 17.3 | 0.54 | 1.0  | 0.2 | 1.8  | 0.6  | 1179.9 | 538.1  | 1.0  | 0.2 |
| Drop-Spot 58  | 64  | 401   | 1.9 | 9.1948  | 5.6   | 0.0025 | 16.7  | 0.0002 | 15.7 | 0.94 | 1.1  | 0.2 | 2.5  | 0.4  | 1778.7 | 102.3  | 1.1  | 0.2 |
| Drop-Spot 129 | 76  | 60    | 1.7 | 15.0664 | 32.8  | 0.0015 | 35.4  | 0.0002 | 13.3 | 0.38 | 1.1  | 0.1 | 1.6  | 0.6  | 818.2  | 702.8  | 1.1  | 0.1 |
| Drop-Spot 146 | 48  | 60    | 2.4 | 7.4959  | 46.8  | 0.0032 | 50.0  | 0.0002 | 17.7 | 0.35 | 1.1  | 0.2 | 3.3  | 1.6  | 2143.3 | 873.0  | 1.1  | 0.2 |
| Drop-Spot 187 | 53  | 507   | 2.6 | 2.0780  | 16.0  | 0.0119 | 22.1  | 0.0002 | 15.3 | 0.69 | 1.2  | 0.2 | 12.0 | 2.6  | NA     | NA     | 1.2  | 0.2 |
| Drop-Spot 303 | 57  | 666   | 2.5 | 2.0562  | 50.0  | 0.0124 | 53.4  | 0.0002 | 18.6 | 0.35 | 1.2  | 0.2 | 12.5 | 6.6  | NA     | NA     | 1.2  | 0.2 |
| Drop-Spot 169 | 65  | 60    | 2.3 | 3.4581  | 24.8  | 0.0078 | 30.2  | 0.0002 | 17.4 | 0.57 | 1.3  | 0.2 | 7.8  | 2.4  | 3413.2 | 392.3  | 1.3  | 0.2 |
| Drop-Spot 74  | 76  | 530   | 1.9 | 2.0722  | 4.6   | 0.0131 | 21.7  | 0.0002 | 21.2 | 0.98 | 1.3  | 0.3 | 13.2 | 2.9  | NA     | NA     | 1.3  | 0.3 |
| Drop-Spot 7   | 60  | 60    | 2.1 | 2.8776  | 10.7  | 0.0096 | 20.5  | 0.0002 | 17.4 | 0.85 | 1.3  | 0.2 | 9.7  | 2.0  | NA     | NA     | 1.3  | 0.2 |
| Drop-Spot 260 | 109 | 60    | 1.6 | 2.9054  | 28.5  | 0.0097 | 30.8  | 0.0002 | 11.6 | 0.38 | 1.3  | 0.2 | 9.8  | 3.0  | NA     | NA     | 1.3  | 0.2 |
| Drop-Spot 252 | 183 | 417   | 1.6 | 2.5707  | 34.8  | 0.0111 | 35.8  | 0.0002 | 8.2  | 0.23 | 1.3  | 0.1 | 11.2 | 4.0  | 3867.1 | 1704.8 | 1.3  | 0.1 |
| Drop-Spot 102 | 153 | 60    | 0.9 | 2.9051  | 40.4  | 0.0099 | 42.2  | 0.0002 | 12.3 | 0.29 | 1.3  | 0.2 | 10.0 | 4.2  | NA     | NA     | 1.3  | 0.2 |
| Drop-Spot 244 | 221 | 700   | 0.7 | 2.0591  | 27.7  | 0.0160 | 33.6  | 0.0002 | 18.9 | 0.56 | 1.5  | 0.3 | 16.1 | 5.4  | NA     | NA     | 1.5  | 0.3 |
| Drop-Spot 100 | 31  | 378   | 1.9 | 2.0902  | 15.3  | 0.0165 | 26.6  | 0.0002 | 21.7 | 0.82 | 1.6  | 0.3 | 16.6 | 4.4  | NA     | NA     | 1.6  | 0.3 |
| Drop-Spot 44  | 147 | 60    | 1.7 | 2.8833  | 6.8   | 0.0124 | 24.0  | 0.0003 | 23.0 | 0.96 | 1.7  | 0.4 | 12.5 | 3.0  | NA     | NA     | 1.7  | 0.4 |
| Drop-Spot 274 | 54  | 60    | 2.3 | 2.9016  | 38.9  | 0.0130 | 50.2  | 0.0003 | 31.7 | 0.63 | 1.8  | 0.6 | 13.1 | 6.6  | NA     | NA     | 1.8  | 0.6 |
| Drop-Spot 256 | 53  | 60    | 2.5 | 2.9092  | 32.3  | 0.0130 | 33.5  | 0.0003 | 8.6  | 0.26 | 1.8  | 0.2 | 13.1 | 4.4  | NA     | NA     | 1.8  | 0.2 |
| Drop-Spot 171 | 57  | 60    | 2.2 | 2.9112  | 10.4  | 0.0131 | 22.4  | 0.0003 | 19.8 | 0.88 | 1.8  | 0.4 | 13.3 | 2.9  | NA     | NA     | 1.8  | 0.4 |
| Drop-Spot 178 | 68  | 276   | 2.4 | 2.8248  | 39.8  | 0.0137 | 43.8  | 0.0003 | 18.3 | 0.42 | 1.8  | 0.3 | 13.8 | 6.0  | 3724.3 | 1602.6 | 1.8  | 0.3 |
| Drop-Spot 296 | 58  | 60    | 1.9 | 2.9015  | 43.4  | 0.0138 | 49.6  | 0.0003 | 24.1 | 0.49 | 1.9  | 0.5 | 13.9 | 6.9  | NA     | NA     | 1.9  | 0.5 |
| Drop-Spot 306 | 30  | 60    | 3.1 | 2.9025  | 19.3  | 0.0171 | 35.8  | 0.0004 | 30.2 | 0.84 | 2.3  | 0.7 | 17.2 | 6.1  | NA     | NA     | 2.3  | 0.7 |
| Drop-Spot 193 | 198 | 381   | 1.4 | 53.4562 | 109.0 | 0.0009 | 110.0 | 0.0004 | 15.2 | 0.14 | 2.3  | 0.4 | 0.9  | 1.0  | NA     | NA     | 2.3  | 0.4 |
| Drop-Spot 183 | 54  | 268   | 2.3 | 2.1314  | 50.0  | 0.0298 | 53.8  | 0.0005 | 19.8 | 0.37 | 3.0  | 0.6 | 29.8 | 15.8 | NA     | NA     | 3.0  | 0.6 |
| Drop-Spot 197 | 230 | 826   | 1.2 | 17.6708 | 11.3  | 0.0046 | 12.2  | 0.0006 | 4.8  | 0.39 | 3.8  | 0.2 | 4.6  | 0.6  | 475.6  | 250.0  | 3.8  | 0.2 |
| Drop-Spot 95  | 50  | 9389  | 2.0 | 2.9235  | 32.5  | 0.0394 | 33.5  | 0.0008 | 8.1  | 0.24 | 5.4  | 0.4 | 39.3 | 12.9 | 3672.0 | 513.4  | 5.4  | 0.4 |
| Drop-Spot 204 | 62  | 617   | 2.1 | 2.0676  | 1.1   | 0.0634 | 37.3  | 0.0010 | 37.3 | 1.00 | 6.1  | 2.3 | 62.4 | 22.6 | NA     | NA     | 6.1  | 2.3 |
| Drop-Spot 300 | 260 | 30306 | 3.4 | 16.9706 | 4.9   | 0.0078 | 5.8   | 0.0010 | 3.1  | 0.54 | 6.2  | 0.2 | 7.9  | 0.5  | 564.3  | 106.4  | 6.2  | 0.2 |
| Drop-Spot 149 | 53  | 8830  | 2.2 | 2.0153  | 48.2  | 0.0676 | 52.7  | 0.0010 | 21.3 | 0.40 | 6.4  | 1.4 | 66.4 | 33.9 | NA     | NA     | 6.4  | 1.4 |
| Drop-Spot 84  | 61  | 360   | 1.9 | 2.1001  | 0.2   | 0.0678 | 9.7   | 0.0010 | 9.7  | 1.00 | 6.7  | 0.6 | 66.6 | 6.2  | NA     | NA     | 6.7  | 0.6 |
| Drop-Spot 125 | 37  | 441   | 1.7 | 3.1744  | 26.8  | 0.0542 | 27.5  | 0.0012 | 6.1  | 0.22 | 8.0  | 0.5 | 53.6 | 14.3 | 3545.7 | 421.7  | 8.0  | 0.5 |
| Drop-Spot 188 | 134 | 60    | 1.1 | 2.9139  | 44.3  | 0.0669 | 62.2  | 0.0014 | 43.7 | 0.70 | 9.1  | 4.0 | 65.7 | 39.6 | NA     | NA     | 9.1  | 4.0 |
| Drop-Spot 227 | 68  | 60    | 2.1 | 2.9067  | 1.3   | 0.0796 | 6.4   | 0.0017 | 6.3  | 0.98 | 10.8 | 0.7 | 77.8 | 4.8  | NA     | NA     | 10.8 | 0.7 |
| Drop-Spot 50  | 138 | 8075  | 2.0 | 21.5525 | 2.3   | 0.0624 | 4.0   | 0.0098 | 3.3  | 0.82 | 62.6 | 2.1 | 61.5 | 2.4  | 18.4   | 55.1   | 62.6 | 2.1 |
| Drop-Spot 286 | 364 | 22950 | 1.3 | 21.0337 | 1.6   | 0.0671 | 3.1   | 0.0102 | 2.6  | 0.85 | 65.6 | 1.7 | 65.9 | 2.0  | 76.6   | 38.0   | 65.6 | 1.7 |
| Drop-Spot 305 | 221 | 8260  | 3.2 | 21.1567 | 1.7   | 0.0757 | 3.3   | 0.0116 | 2.9  | 0.86 | 74.5 | 2.1 | 74.1 | 2.4  |        |        |      |     |

|               |      |        |      |         |      |        |      |        |     |      |         |     |       |     |        |       |       |     |
|---------------|------|--------|------|---------|------|--------|------|--------|-----|------|---------|-----|-------|-----|--------|-------|-------|-----|
| Drop-Spot 12  | 237  | 31450  | 1.8  | 18.7056 | 1.4  | 0.3584 | 2.8  | 0.0487 | 2.5 | 0.88 | 306.2   | 7.4 | 311.1 | 7.6 | 348.3  | 30.7  | 306.2 | 7.4 |
| Drop-Spot 91  | 116  | 18889  | 2.1  | 18.7510 | 1.2  | 0.3586 | 3.0  | 0.0488 | 2.8 | 0.92 | 307.1   | 8.4 | 311.2 | 8.1 | 342.9  | 26.2  | 307.1 | 8.4 |
| Drop-Spot 167 | 208  | 107825 | 3.3  | 19.1294 | 1.0  | 0.3517 | 3.0  | 0.0488 | 2.9 | 0.94 | 307.2   | 8.6 | 306.0 | 8.1 | 297.5  | 23.6  | 307.2 | 8.6 |
| Drop-Spot 33  | 171  | 33689  | 2.5  | 19.0782 | 1.3  | 0.3569 | 3.2  | 0.0494 | 2.9 | 0.92 | 310.8   | 8.9 | 309.9 | 8.6 | 303.6  | 29.0  | 310.8 | 8.9 |
| Drop-Spot 298 | 51   | 11087  | 4.0  | 18.7327 | 2.0  | 0.3763 | 3.4  | 0.0511 | 2.8 | 0.81 | 321.6   | 8.8 | 324.3 | 9.6 | 345.1  | 45.4  | 321.6 | 8.8 |
| Duke River    |      |        |      |         |      |        |      |        |     |      |         |     |       |     |        |       |       |     |
| Duke-Spot 192 | 102  | 1467   | 3.8  | 29.1520 | 9.4  | 0.0119 | 10.9 | 0.0025 | 5.6 | 0.51 | 16.3    | 0.9 | 12.0  | 1.3 | NA     | NA    | 16.3  | 0.9 |
| Duke-Spot 146 | 120  | 1718   | 4.6  | 21.3327 | 8.2  | 0.0167 | 8.6  | 0.0026 | 2.7 | 0.31 | 16.6    | 0.4 | 16.8  | 1.4 | 41.9   | 195.8 | 16.6  | 0.4 |
| Duke-Spot 309 | 330  | 1359   | 2.8  | 26.7026 | 3.8  | 0.0134 | 4.6  | 0.0026 | 2.6 | 0.57 | 16.7    | 0.4 | 13.5  | 0.6 | NA     | NA    | 16.7  | 0.4 |
| Duke-Spot 163 | 251  | 1781   | 1.6  | 12.3386 | 8.3  | 0.0291 | 8.7  | 0.0026 | 2.5 | 0.29 | 16.8    | 0.4 | 29.1  | 2.5 | 1221.7 | 164.3 | 16.8  | 0.4 |
| Duke-Spot 208 | 102  | 2812   | 2.7  | 16.9988 | 7.2  | 0.0217 | 8.3  | 0.0027 | 4.1 | 0.50 | 17.2    | 0.7 | 21.8  | 1.8 | 559.8  | 157.0 | 17.2  | 0.7 |
| Duke-Spot 127 | 205  | 1908   | 5.0  | 16.1231 | 6.6  | 0.0232 | 8.0  | 0.0027 | 4.5 | 0.57 | 17.5    | 0.8 | 23.3  | 1.8 | 673.9  | 141.0 | 17.5  | 0.8 |
| Duke-Spot 15  | 128  | 568    | 2.1  | 51.0197 | 20.1 | 0.0074 | 20.4 | 0.0027 | 3.5 | 0.17 | 17.6    | 0.6 | 7.5   | 1.5 | NA     | NA    | 17.6  | 0.6 |
| Duke-Spot 246 | 241  | 2471   | 2.4  | 21.3549 | 8.0  | 0.0179 | 9.8  | 0.0028 | 5.7 | 0.58 | 17.9    | 1.0 | 18.1  | 1.8 | 39.4   | 191.8 | 17.9  | 1.0 |
| Duke-Spot 63  | 209  | 1991   | 1.1  | 24.3201 | 5.4  | 0.0160 | 7.1  | 0.0028 | 4.6 | 0.65 | 18.2    | 0.8 | 16.1  | 1.1 | NA     | NA    | 18.2  | 0.8 |
| Duke-Spot 227 | 82   | 23165  | 4.3  | 14.3224 | 8.6  | 0.0275 | 9.6  | 0.0029 | 4.4 | 0.45 | 18.4    | 0.8 | 27.5  | 2.6 | 922.2  | 176.1 | 18.4  | 0.8 |
| Duke-Spot 256 | 6606 | 13681  | 0.1  | 17.8243 | 4.1  | 0.0480 | 6.4  | 0.0062 | 5.0 | 0.77 | 39.9    | 2.0 | 47.6  | 3.0 | 455.5  | 90.0  | 39.9  | 2.0 |
| Duke-Spot 138 | 1573 | 23913  | 3.0  | 20.9656 | 1.0  | 0.0530 | 2.1  | 0.0081 | 1.8 | 0.88 | 51.7    | 0.9 | 52.4  | 1.1 | 83.2   | 23.9  | 51.7  | 0.9 |
| Duke-Spot 261 | 918  | 75240  | 3.4  | 20.7734 | 1.4  | 0.0539 | 2.3  | 0.0081 | 1.8 | 0.79 | 52.1    | 0.9 | 53.3  | 1.2 | 105.0  | 33.8  | 52.1  | 0.9 |
| Duke-Spot 28  | 582  | 60213  | 3.3  | 20.9416 | 1.6  | 0.0550 | 2.3  | 0.0084 | 1.6 | 0.71 | 53.7    | 0.9 | 54.4  | 1.2 | 86.0   | 38.7  | 53.7  | 0.9 |
| Duke-Spot 94  | 1206 | 26953  | 4.1  | 21.1362 | 1.3  | 0.0546 | 2.1  | 0.0084 | 1.7 | 0.80 | 53.8    | 0.9 | 54.0  | 1.1 | 64.0   | 29.9  | 53.8  | 0.9 |
| Duke-Spot 157 | 226  | 2275   | 4.1  | 21.6468 | 3.0  | 0.0545 | 3.4  | 0.0086 | 1.5 | 0.44 | 55.0    | 0.8 | 53.9  | 1.8 | 6.8    | 73.3  | 55.0  | 0.8 |
| Duke-Spot 152 | 926  | 11506  | 3.1  | 19.7654 | 2.2  | 0.0599 | 2.9  | 0.0086 | 1.9 | 0.67 | 55.1    | 1.1 | 59.0  | 1.7 | 221.3  | 49.8  | 55.1  | 1.1 |
| Duke-Spot 49  | 647  | 7922   | 3.5  | 21.8564 | 2.6  | 0.0548 | 3.1  | 0.0087 | 1.7 | 0.55 | 55.7    | 0.9 | 54.1  | 1.6 | NA     | NA    | 55.7  | 0.9 |
| Duke-Spot 255 | 648  | 11710  | 3.0  | 21.0320 | 1.8  | 0.0570 | 2.6  | 0.0087 | 1.9 | 0.72 | 55.9    | 1.1 | 56.3  | 1.4 | 75.7   | 43.4  | 55.9  | 1.1 |
| Duke-Spot 298 | 816  | 19472  | 5.3  | 21.4232 | 1.8  | 0.0561 | 2.3  | 0.0087 | 1.5 | 0.65 | 56.0    | 0.8 | 55.5  | 1.3 | 31.8   | 42.1  | 56.0  | 0.8 |
| Duke-Spot 209 | 912  | 24720  | 2.5  | 21.4141 | 1.5  | 0.0564 | 2.4  | 0.0088 | 1.8 | 0.77 | 56.2    | 1.0 | 55.7  | 1.3 | 32.8   | 36.0  | 56.2  | 1.0 |
| Duke-Spot 66  | 804  | 285138 | 6.5  | 21.4167 | 1.6  | 0.0566 | 2.3  | 0.0088 | 1.7 | 0.73 | 56.5    | 0.9 | 55.9  | 1.2 | 32.5   | 37.3  | 56.5  | 0.9 |
| Duke-Spot 48  | 357  | 18182  | 2.8  | 21.2386 | 1.6  | 0.0573 | 2.4  | 0.0088 | 1.7 | 0.72 | 56.7    | 1.0 | 56.6  | 1.3 | 52.4   | 39.3  | 56.7  | 1.0 |
| Duke-Spot 158 | 161  | 20953  | 2.6  | 19.2098 | 4.0  | 0.0644 | 4.6  | 0.0090 | 2.3 | 0.50 | 57.6    | 1.3 | 63.4  | 2.9 | 286.9  | 92.0  | 57.6  | 1.3 |
| Duke-Spot 197 | 1237 | 53375  | 2.8  | 21.5750 | 1.1  | 0.0577 | 2.1  | 0.0090 | 1.7 | 0.84 | 57.9    | 1.0 | 56.9  | 1.1 | 14.8   | 27.0  | 57.9  | 1.0 |
| Duke-Spot 299 | 449  | 25637  | 3.5  | 20.7136 | 1.3  | 0.0602 | 2.4  | 0.0090 | 2.0 | 0.82 | 58.0    | 1.1 | 59.3  | 1.4 | 111.9  | 31.8  | 58.0  | 1.1 |
| Duke-Spot 190 | 189  | 6143   | 2.1  | 21.7358 | 3.9  | 0.0580 | 5.0  | 0.0091 | 3.1 | 0.62 | 58.7    | 1.8 | 57.2  | 2.8 | NA     | NA    | 58.7  | 1.8 |
| Duke-Spot 220 | 288  | 55352  | 3.7  | 21.1149 | 2.3  | 0.0600 | 3.4  | 0.0092 | 2.6 | 0.75 | 59.0    | 1.5 | 59.1  | 2.0 | 66.4   | 54.1  | 59.0  | 1.5 |
| Duke-Spot 129 | 238  | 2894   | 3.7  | 23.3051 | 6.5  | 0.0543 | 6.6  | 0.0092 | 1.2 | 0.18 | 59.0    | 0.7 | 53.7  | 3.5 | NA     | NA    | 59.0  | 0.7 |
| Duke-Spot 11  | 340  | 19913  | 10.3 | 20.1832 | 3.3  | 0.0631 | 3.8  | 0.0092 | 2.0 | 0.51 | 59.3    | 1.2 | 62.1  | 2.3 | 172.7  | 76.7  | 59.3  | 1.2 |
| Duke-Spot 185 | 308  | 96035  | 4.1  | 19.2507 | 3.2  | 0.0662 | 4.0  | 0.0092 | 2.5 | 0.62 | 59.3    | 1.5 | 65.1  | 2.5 | 282.1  | 72.3  | 59.3  | 1.5 |
| Duke-Spot 30  | 296  | 4267   | 5.9  | 22.0552 | 2.8  | 0.0578 | 3.7  | 0.0093 | 2.4 | 0.64 | 59.4    | 1.4 | 57.1  | 2.1 | NA     | NA    | 59.4  | 1.4 |
| Duke-Spot 102 | 134  | 2989   | 3.5  | 20.5971 | 6.3  | 0.0620 | 6.6  | 0.0093 | 1.9 | 0.29 | 59.5    | 1.1 | 61.1  | 3.9 | 125.1  | 148.1 | 59.5  | 1.1 |
| Duke-Spot 20  | 166  | 2804   | 6.7  | 21.3633 | 3.8  | 0.0598 | 3.9  | 0.0093 | 1.2 | 0.30 | 59.5    | 0.7 | 59.0  | 2.3 | 38.4   | 89.9  | 59.5  | 0.7 |
| Duke-Spot 199 | 319  | 13333  | 4.0  | 21.0167 | 3.3  | 0.0609 | 4.1  | 0.0093 | 2.5 | 0.61 | 59.6    | 1.5 | 60.0  | 2.4 | 77.4   | 78.0  | 59.6  | 1.5 |
| Duke-Spot 70  | 215  | 4369   | 2.8  | 22.3258 | 3.1  | 0.0575 | 3.9  | 0.0093 | 2.4 | 0.61 | 59.8    | 1.4 | 56.8  | 2.2 | NA     | NA    | 59.8  | 1.4 |
| Duke-Spot 238 | 647  | 15254  | 3.6  | 21.2843 | 1.9  | 0.0604 | 2.5  | 0.0093 | 1.6 | 0.65 | 59.9    | 1.0 | 59.6  | 1.4 | 47.3   | 45.1  | 59.9  | 1.0 |
| Duke-Spot 87  | 141  | 1860   | 5.1  | 23.5546 | 10.2 | 0.0551 | 10.4 | 0.0094 | 2.2 | 0.22 | 60.4    | 1.3 | 54.4  | 5.5 | NA     | NA    | 60.4  | 1.3 |
| Duke-Spot 310 | 686  | 105141 | 2.3  | 20.5810 | 1.6  | 0.0631 | 2.2  | 0.0094 | 1.5 | 0.70 | 60.4    | 0.9 | 62.1  | 1.3 | 127.0  | 37.2  | 60.4  | 0.9 |
| Duke-Spot 69  | 337  | 23968  | 2.4  | 20.3068 | 2.7  | 0.0650 | 3.2  | 0.0096 | 1.8 | 0.55 | 61.4    | 1.1 | 63.9  | 2.0 | 158.5  | 62.7  | 61.4  | 1.1 |
| Duke-Spot 196 | 275  | 41410  | 7.5  | 21.6490 | 3.3  | 0.0610 | 4.0  | 0.0096 | 2.4 | 0.60 | 61.5    | 1.5 | 60.1  | 2.4 | 6.6    | 78.3  | 61.5  | 1.5 |
| Duke-Spot 14  | 889  | 25274  | 3.7  | 21.2028 | 1.5  | 0.0624 | 2.4  | 0.0096 | 1.9 | 0.78 | 61.6    | 1.1 | 61.4  | 1.4 | 56.5   | 35.7  | 61.6  | 1.1 |
| Duke-Spot 106 | 153  | 2433   | 2.5  | 23.0125 | 4.7  | 0.0582 | 5.7  | 0.0097 | 3.3 | 0.58 | 62.4    | 2.1 | 57.5  | 3.2 | NA     | NA    | 62.4  | 2.1 |
| Duke-Spot 212 | 374  | 12638  | 3.1  | 19.0685 | 4.4  | 0.0707 | 5.4  | 0.0098 | 3.0 | 0.57 | 62.8    | 1.9 | 69.4  | 3.6 | 303.8  | 101.0 | 62.8  | 1.9 |
| Duke-Spot 268 | 153  | 11932  | 5.1  | 19.2647 | 3.8  | 0.0700 | 4.0  | 0.0098 | 1.5 | 0.37 | 62.8    | 0.9 | 68.7  | 2.7 | 280.4  | 86.1  | 62.8  | 0.9 |
| Duke-Spot 206 | 540  | 11238  | 4.8  | 21.7232 | 2.2  | 0.0626 | 3.0  | 0.0099 | 2.0 | 0.69 | 63.3    | 1.3 | 61.6  | 1.8 | NA     | NA    | 63.3  | 1.3 |
| Duke-Spot 180 | 269  | 25610  | 4.5  | 21.1189 | 2.5  | 0.0645 | 3.4  | 0.0099 | 2.2 | 0.66 | 63.4    | 1.4 | 63.4  | 2.1 | 66.0   | 60.6  | 63.4  | 1.4 |
| Duke-Spot 142 | 464  | 5982   | 6.0  | 19.7303 | 3.3  | 0.0700 | 4.0  | 0.0100 | 2.2 | 0.55 | 64.3    | 1.4 | 68.7  | 2.6 | 225.5  | 76.9  | 64.3  | 1.4 |
| Duke-Spot 225 | 2086 | 25492  | 5.8  | 20.8935 | 1.1  | 0.0661 | 2.0  | 0.0100 | 1.8 | 0.86 | 64.3    | 1.1 | 65.0  | 1.3 | 91.4   | 25.1  | 64.3  | 1.1 |
| Duke-Spot 211 | 676  | 54970  | 6.0  | 21.0644 | 1.4  | 0.0664 | 2.5  | 0.0101 | 2.1 | 0.82 | 65.1    | 1.3 | 65.3  | 1.6 | 72.1   | 33.8  | 65.1  | 1.3 |
| Duke-Spot 244 | 413  | 16748  | 6.0  | 22.1639 | 1.4  | 0.0638 | 2.2  | 0.0103 | 1.6 | 0.76 | 65.8    | 1.1 | 62.8  | 1.3 | NA     | NA    | 65.8  | 1.1 |
| Duke-Spot 243 | 237  | 5928   | 3.1  | 22.2572 | 2.6  | 0.0668 | 3.0  | 0.0108 | 1.6 | 0.52 | 69.2    | 1.1 | 65.7  | 1.9 | NA     | NA    | 69.2  | 1.1 |
| Duke-Spot 223 | 1656 | 166640 | 13.7 | 21.0043 | 0.9  | 0.0782 | 1.9  | 0.0119 | 1.7 | 0.87 | 76.4    | 1.3 | 76.5  | 1.4 | 78.8   | 22.0  | 76.4  | 1.3 |
| Duke-Spot 288 | 286  | 6837   | 2.5  | 21.9043 | 3.3  | 0.0778 | 3.8  | 0.0124 | 1.8 | 0.47 | 79.2    | 1.4 | 76.1  | 2.8 | NA     | NA    | 79.2  | 1.4 |
| Duke-Spot 122 | 128  | 6701   | 4.4  | 20.5717 | 3.1  | 0.0884 | 3.4  | 0.0132 | 1.4 | 0.41 | 84.5    | 1.2 | 86.0  | 2.8 | 128.1  | 73.6  | 84.5  | 1.2 |
| Duke-Spot 21  | 132  | 2505   | 4.5  | 23.5343 | 3.0  | 0.0775 | 3.2  | 0.0132 | 1.1 | 0.34 | 84.7    | 0.9 | 75.7  | 2.3 | NA     | NA    | 84.7  | 0.9 |
| Duke-Spot 86  | 44   | 3173   | 4.1  | 17.0354 | 7.5  | 0.1152 | 8.1  | 0.0142 | 3.0 | 0.38 | 91.1    | 2.7 | 110.7 | 8.5 | 555.1  | 163.7 | 91.1  | 2.7 |
| Duke-Spot 56  | 59   | 5796   | 5.8  | 21.3054 | 4.6  | 0.0959 | 5.1  | 0.0148 | 2.4 | 0.46 | 94.8    | 2.2 | 93.0  | 4.6 | 44.9   | 108.9 | 94.8  | 2.2 |
| Duke-Spot 300 | 49   | 3033   | 3.4  | 22.8123 | 6.7  | 0.0902 | 7.3  | 0.0149 | 2.9 | 0.40 | 95.6    | 2.8 | 87.7  | 6.2 | NA     | NA    | 95.6  | 2.8 |
| Duke-Spot 210 | 118  | 11219  | 2.3  | 20.9364 | 3.1  | 0.1132 | 3.3  | 0.0172 | 1.3 | 0.40 | 109.9   | 1.5 | 108.9 | 3.4 | 86.6   | 72.6  | 109.9 | 1.5 |
| Duke-Spot 59  | 65   | 9568   | 2.9  | 21.1893 | 3.1  | 0.1132 | 3.4  | 0.0174 | 1.3 | 0.38 | 111.2   | 1.4 | 108.9 | 3.5 | 58.0   | 74.9  | 111.2 | 1.4 |
| Duke-Spot 96  | 75   | 3040   | 3.9  | 22.4601 | 2.5  | 0.1076 | 2.8  | 0.0175 | 1.3 | 0.47 | 112.0   | 1.5 | 103.8 | 2.8 | NA     | NA    | 112.0 | 1.5 |
| Duke-Spot 186 | 84   | 2030   | 7.3  | 23.1073 | 4.8  | 0.1054 | 5.9  | 0.0177 | 3.3 | 0.57 | 113.0   | 3.7 | 101.8 | 5.7 | NA     | NA    | 113.0 | 3.7 |
| Duke-Spot 175 | 123  | 2516   | 1.8  | 22.2309 | 3.8  | 0.1108 | 4.6  | 0.0179 | 2.6 | 0.57 | 114.2</ |     |       |     |        |       |       |     |

|               |      |          |      |         |     |        |     |        |     |      |       |     |       |      |        |       |       |     |
|---------------|------|----------|------|---------|-----|--------|-----|--------|-----|------|-------|-----|-------|------|--------|-------|-------|-----|
| Duke-Spot 39  | 65   | 12928    | 3.8  | 19.2390 | 3.6 | 0.1342 | 4.2 | 0.0187 | 2.3 | 0.54 | 119.7 | 2.7 | 127.9 | 5.1  | 283.5  | 81.5  | 119.7 | 2.7 |
| Duke-Spot 240 | 84   | 8228     | 4.8  | 18.8926 | 5.0 | 0.1371 | 5.7 | 0.0188 | 2.8 | 0.50 | 120.0 | 3.4 | 130.4 | 7.0  | 324.8  | 112.5 | 120.0 | 3.4 |
| Duke-Spot 204 | 56   | 2167     | 4.6  | 24.3102 | 8.7 | 0.1066 | 9.0 | 0.0188 | 2.5 | 0.28 | 120.0 | 3.0 | 102.8 | 8.8  | NA     | NA    | 120.0 | 3.0 |
| Duke-Spot 156 | 187  | 53210    | 1.8  | 20.3037 | 1.8 | 0.1277 | 2.3 | 0.0188 | 1.4 | 0.60 | 120.1 | 1.6 | 122.0 | 2.6  | 158.9  | 42.2  | 120.1 | 1.6 |
| Duke-Spot 23  | 50   | 31380    | 4.3  | 19.4506 | 3.5 | 0.1335 | 4.2 | 0.0188 | 2.2 | 0.53 | 120.3 | 2.6 | 127.2 | 5.0  | 258.4  | 80.9  | 120.3 | 2.6 |
| Duke-Spot 202 | 63   | 35883    | 3.0  | 19.9559 | 4.1 | 0.1305 | 5.6 | 0.0189 | 3.8 | 0.68 | 120.7 | 4.5 | 124.5 | 6.6  | 199.1  | 95.9  | 120.7 | 4.5 |
| Duke-Spot 233 | 211  | 84556    | 2.3  | 20.2611 | 2.2 | 0.1304 | 2.9 | 0.0192 | 1.8 | 0.62 | 122.4 | 2.1 | 124.5 | 3.3  | 163.7  | 52.4  | 122.4 | 2.1 |
| Duke-Spot 104 | 58   | 40885    | 3.9  | 19.9234 | 4.3 | 0.1328 | 5.8 | 0.0192 | 3.9 | 0.68 | 122.6 | 4.7 | 126.6 | 6.9  | 202.9  | 99.0  | 122.6 | 4.7 |
| Duke-Spot 247 | 73   | 3461     | 2.5  | 17.9996 | 3.9 | 0.1474 | 4.8 | 0.0192 | 2.8 | 0.58 | 122.9 | 3.4 | 139.6 | 6.3  | 433.7  | 87.8  | 122.9 | 3.4 |
| Duke-Spot 8   | 43   | 7929     | 3.6  | 15.1945 | 7.4 | 0.1746 | 8.5 | 0.0193 | 4.1 | 0.48 | 122.9 | 5.0 | 163.4 | 12.8 | 799.5  | 155.4 | 122.9 | 5.0 |
| Duke-Spot 182 | 498  | 54518    | 2.0  | 20.9599 | 0.9 | 0.1287 | 1.5 | 0.0196 | 1.2 | 0.80 | 124.9 | 1.5 | 122.9 | 1.8  | 83.9   | 21.5  | 124.9 | 1.5 |
| Duke-Spot 100 | 99   | 4990     | 5.3  | 10.4884 | 8.8 | 0.2603 | 9.3 | 0.0198 | 3.1 | 0.33 | 126.5 | 3.8 | 234.9 | 19.5 | 1534.0 | 165.3 | 126.5 | 3.8 |
| Duke-Spot 200 | 64   | 13921    | 3.4  | 18.8453 | 4.5 | 0.1452 | 5.1 | 0.0199 | 2.5 | 0.48 | 126.7 | 3.1 | 137.6 | 6.6  | 330.6  | 102.3 | 126.7 | 3.1 |
| Duke-Spot 314 | 368  | 80430    | 3.2  | 19.7627 | 1.2 | 0.1428 | 2.1 | 0.0205 | 1.7 | 0.82 | 130.6 | 2.2 | 135.5 | 2.6  | 221.7  | 27.6  | 130.6 | 2.2 |
| Duke-Spot 85  | 145  | 10872    | 2.4  | 21.0567 | 2.3 | 0.1617 | 2.8 | 0.0247 | 1.7 | 0.60 | 157.3 | 2.6 | 152.2 | 4.0  | 73.0   | 53.9  | 157.3 | 2.6 |
| Duke-Spot 295 | 50   | 3832     | 3.0  | 21.3866 | 3.4 | 0.1823 | 4.6 | 0.0283 | 3.2 | 0.68 | 179.9 | 5.6 | 170.1 | 7.3  | 35.8   | 80.9  | 179.9 | 5.6 |
| Duke-Spot 1   | 491  | 59110    | 3.3  | 20.4779 | 1.5 | 0.1974 | 2.2 | 0.0293 | 1.5 | 0.70 | 186.4 | 2.8 | 182.9 | 3.6  | 138.8  | 36.1  | 186.4 | 2.8 |
| Duke-Spot 273 | 3190 | 230503   | 3.8  | 19.0177 | 0.8 | 0.2915 | 1.7 | 0.0402 | 1.5 | 0.88 | 254.2 | 3.7 | 259.7 | 3.8  | 309.8  | 17.8  | 254.2 | 3.7 |
| Duke-Spot 270 | 1057 | 207467   | 2.8  | 19.2159 | 1.1 | 0.3017 | 1.9 | 0.0421 | 1.5 | 0.81 | 265.6 | 3.9 | 267.7 | 4.4  | 286.2  | 24.7  | 265.6 | 3.9 |
| Duke-Spot 294 | 30   | 4638     | 2.3  | 20.6615 | 2.5 | 0.2863 | 3.0 | 0.0429 | 1.6 | 0.54 | 270.9 | 4.3 | 255.6 | 6.7  | 117.8  | 58.7  | 270.9 | 4.3 |
| Duke-Spot 195 | 602  | 79680    | 2.0  | 19.3719 | 1.0 | 0.3091 | 1.7 | 0.0434 | 1.4 | 0.80 | 274.1 | 3.6 | 273.5 | 4.0  | 267.6  | 23.1  | 274.1 | 3.6 |
| Duke-Spot 19  | 606  | 80023    | 1.8  | 19.2858 | 0.7 | 0.3117 | 1.8 | 0.0436 | 1.6 | 0.91 | 275.2 | 4.4 | 275.5 | 4.3  | 277.9  | 16.9  | 275.2 | 4.4 |
| Duke-Spot 221 | 877  | 320501   | 2.6  | 19.2180 | 0.9 | 0.3133 | 2.1 | 0.0437 | 1.8 | 0.90 | 275.7 | 5.0 | 276.7 | 5.0  | 285.9  | 20.9  | 275.7 | 5.0 |
| Duke-Spot 311 | 448  | 89634    | 4.1  | 19.1398 | 0.9 | 0.3146 | 2.0 | 0.0437 | 1.8 | 0.89 | 275.7 | 4.9 | 277.7 | 5.0  | 295.2  | 21.0  | 275.7 | 4.9 |
| Duke-Spot 42  | 296  | 27108    | 3.9  | 19.5127 | 1.2 | 0.3115 | 2.1 | 0.0441 | 1.7 | 0.81 | 278.2 | 4.6 | 275.4 | 5.0  | 251.0  | 28.4  | 278.2 | 4.6 |
| Duke-Spot 80  | 485  | 38846    | 3.8  | 19.4871 | 1.2 | 0.3123 | 2.2 | 0.0442 | 1.8 | 0.85 | 278.6 | 5.0 | 276.0 | 5.3  | 254.0  | 26.9  | 278.6 | 5.0 |
| Duke-Spot 144 | 368  | 46526    | 3.5  | 19.6244 | 0.9 | 0.3106 | 1.9 | 0.0442 | 1.6 | 0.88 | 279.0 | 4.5 | 274.6 | 4.5  | 237.9  | 20.7  | 279.0 | 4.5 |
| Duke-Spot 34  | 223  | 34313    | 3.7  | 19.3243 | 1.3 | 0.3175 | 1.8 | 0.0445 | 1.3 | 0.69 | 280.8 | 3.5 | 280.0 | 4.5  | 273.3  | 30.5  | 280.8 | 3.5 |
| Duke-Spot 113 | 935  | 25306970 | 7.5  | 19.3338 | 1.0 | 0.3175 | 1.8 | 0.0445 | 1.4 | 0.81 | 280.9 | 4.0 | 280.0 | 4.3  | 272.2  | 23.8  | 280.9 | 4.0 |
| Duke-Spot 147 | 377  | 58874    | 13.5 | 18.9692 | 1.4 | 0.3238 | 2.2 | 0.0446 | 1.7 | 0.78 | 281.1 | 4.7 | 284.8 | 5.4  | 315.6  | 30.9  | 281.1 | 4.7 |
| Duke-Spot 242 | 148  | 98664    | 5.5  | 18.8353 | 1.8 | 0.3263 | 2.2 | 0.0446 | 1.3 | 0.60 | 281.2 | 3.7 | 286.7 | 5.6  | 331.7  | 40.2  | 281.2 | 3.7 |
| Duke-Spot 47  | 276  | 66584    | 4.5  | 19.3387 | 1.1 | 0.3181 | 1.8 | 0.0446 | 1.4 | 0.78 | 281.5 | 3.9 | 280.4 | 4.5  | 271.6  | 26.0  | 281.5 | 3.9 |
| Duke-Spot 72  | 306  | 42979    | 3.7  | 19.2792 | 1.4 | 0.3192 | 2.0 | 0.0446 | 1.4 | 0.71 | 281.6 | 3.8 | 281.3 | 4.8  | 278.7  | 31.8  | 281.6 | 3.8 |
| Duke-Spot 18  | 167  | 162047   | 3.9  | 19.6585 | 1.3 | 0.3146 | 1.8 | 0.0449 | 1.2 | 0.69 | 283.0 | 3.3 | 277.7 | 4.3  | 233.9  | 29.4  | 283.0 | 3.3 |
| Duke-Spot 140 | 189  | 12397    | 2.9  | 19.3434 | 1.6 | 0.3198 | 2.1 | 0.0449 | 1.3 | 0.64 | 283.0 | 3.7 | 281.7 | 5.1  | 271.0  | 36.8  | 283.0 | 3.7 |
| Duke-Spot 35  | 226  | 64756    | 6.0  | 19.2795 | 1.4 | 0.3230 | 2.4 | 0.0452 | 1.9 | 0.79 | 284.9 | 5.2 | 284.2 | 5.9  | 278.6  | 33.1  | 284.9 | 5.2 |
| Duke-Spot 275 | 256  | 58707    | 8.3  | 19.4003 | 1.2 | 0.3308 | 2.8 | 0.0466 | 2.5 | 0.89 | 293.4 | 7.0 | 290.2 | 6.9  | 264.3  | 28.6  | 293.4 | 7.0 |
| Duke-Spot 131 | 955  | 75916    | 3.3  | 19.0269 | 0.9 | 0.3384 | 1.7 | 0.0467 | 1.4 | 0.84 | 294.4 | 4.1 | 296.0 | 4.4  | 308.8  | 21.0  | 294.4 | 4.1 |
| Duke-Spot 205 | 102  | 20504    | 3.0  | 18.3275 | 1.8 | 0.3885 | 2.2 | 0.0517 | 1.3 | 0.57 | 324.7 | 4.0 | 333.2 | 6.3  | 393.4  | 40.9  | 324.7 | 4.0 |
| Duke-Spot 188 | 1480 | 23425    | 12.1 | 12.8869 | 1.4 | 0.5810 | 2.2 | 0.0543 | 1.7 | 0.77 | 341.0 | 5.7 | 465.1 | 8.3  | 1135.8 | 28.1  | 341.0 | 5.7 |
| Duke-Spot 116 | 386  | 412065   | 9.3  | 18.1817 | 0.9 | 0.4165 | 1.8 | 0.0549 | 1.6 | 0.87 | 344.8 | 5.4 | 353.5 | 5.5  | 411.2  | 20.6  | 344.8 | 5.4 |
| Duke-Spot 95  | 271  | 531892   | 3.9  | 18.6665 | 1.1 | 0.4068 | 2.0 | 0.0551 | 1.7 | 0.85 | 345.7 | 5.8 | 346.5 | 6.0  | 352.1  | 24.1  | 345.7 | 5.8 |
| Duke-Spot 207 | 1826 | 86972    | 1.9  | 17.3766 | 0.8 | 0.4594 | 2.0 | 0.0579 | 1.8 | 0.92 | 362.9 | 6.4 | 383.8 | 6.3  | 511.7  | 16.8  | 362.9 | 6.4 |
| Duke-Spot 277 | 176  | 30349    | 0.8  | 18.1856 | 1.1 | 0.4891 | 1.6 | 0.0645 | 1.2 | 0.75 | 403.2 | 4.7 | 404.3 | 5.4  | 410.8  | 23.8  | 403.2 | 4.7 |
| Duke-Spot 307 | 732  | 110136   | 2.2  | 17.9473 | 0.8 | 0.5000 | 1.7 | 0.0651 | 1.5 | 0.88 | 406.6 | 5.8 | 411.7 | 5.7  | 440.2  | 18.2  | 406.6 | 5.8 |
| Duke-Spot 31  | 548  | 127185   | 2.0  | 18.0294 | 1.0 | 0.5040 | 1.7 | 0.0659 | 1.4 | 0.83 | 411.6 | 5.8 | 414.4 | 5.9  | 430.0  | 21.4  | 411.6 | 5.8 |
| Duke-Spot 272 | 620  | 59246    | 2.6  | 17.7954 | 1.0 | 0.5129 | 2.0 | 0.0662 | 1.7 | 0.87 | 413.4 | 6.8 | 420.4 | 6.7  | 459.1  | 21.4  | 413.4 | 6.8 |
| Duke-Spot 166 | 285  | 63543    | 3.2  | 17.7668 | 0.9 | 0.5184 | 1.8 | 0.0668 | 1.5 | 0.86 | 417.0 | 6.1 | 424.1 | 6.1  | 462.7  | 19.7  | 417.0 | 6.1 |
| Duke-Spot 13  | 246  | 29221    | 2.2  | 17.9922 | 1.1 | 0.5139 | 1.8 | 0.0671 | 1.4 | 0.80 | 418.6 | 5.8 | 421.1 | 6.1  | 434.6  | 23.6  | 418.6 | 5.8 |
| Duke-Spot 258 | 329  | 54859    | 1.2  | 17.8993 | 1.1 | 0.5188 | 2.4 | 0.0674 | 2.2 | 0.89 | 420.4 | 8.9 | 424.4 | 8.4  | 446.1  | 24.2  | 420.4 | 8.9 |
| Duke-Spot 133 | 1280 | 149901   | 2.0  | 17.5283 | 0.8 | 0.5364 | 2.1 | 0.0682 | 1.9 | 0.91 | 425.5 | 7.7 | 436.1 | 7.3  | 492.5  | 18.4  | 425.5 | 7.7 |
| Duke-Spot 155 | 104  | 75838    | 1.6  | 18.1469 | 1.3 | 0.5186 | 1.8 | 0.0683 | 1.2 | 0.67 | 425.8 | 4.8 | 424.2 | 6.1  | 415.5  | 29.2  | 425.8 | 4.8 |
| Duke-Spot 150 | 120  | 62100    | 3.4  | 18.0728 | 1.2 | 0.5218 | 1.9 | 0.0684 | 1.4 | 0.77 | 426.7 | 6.0 | 426.4 | 6.6  | 424.7  | 27.0  | 426.7 | 6.0 |
| Duke-Spot 45  | 245  | 52875    | 2.3  | 17.5366 | 1.0 | 0.5387 | 1.5 | 0.0686 | 1.1 | 0.74 | 427.4 | 4.7 | 437.6 | 5.5  | 491.5  | 22.8  | 427.4 | 4.7 |
| Duke-Spot 111 | 1144 | 3519824  | 1.1  | 17.8213 | 0.8 | 0.5319 | 1.7 | 0.0688 | 1.6 | 0.89 | 428.8 | 6.5 | 433.1 | 6.2  | 455.9  | 17.6  | 428.8 | 6.5 |
| Duke-Spot 159 | 187  | 28741    | 3.3  | 18.4220 | 1.3 | 0.5161 | 1.9 | 0.0690 | 1.4 | 0.74 | 430.0 | 5.9 | 422.5 | 6.7  | 381.8  | 29.3  | 430.0 | 5.9 |
| Duke-Spot 184 | 562  | 95156    | 0.8  | 17.9294 | 1.0 | 0.5313 | 2.0 | 0.0691 | 1.7 | 0.87 | 430.8 | 7.2 | 432.7 | 6.9  | 442.4  | 21.4  | 430.8 | 7.2 |
| Duke-Spot 251 | 268  | 85001    | 3.5  | 17.9600 | 0.9 | 0.5310 | 1.9 | 0.0692 | 1.7 | 0.89 | 431.3 | 7.1 | 432.5 | 6.8  | 438.6  | 19.2  | 431.3 | 7.1 |
| Duke-Spot 271 | 179  | 21152    | 2.3  | 17.9940 | 1.3 | 0.5319 | 1.8 | 0.0694 | 1.3 | 0.70 | 432.8 | 5.3 | 433.1 | 6.4  | 434.4  | 28.9  | 432.8 | 5.3 |
| Duke-Spot 226 | 349  | 39846    | 1.3  | 17.9821 | 1.4 | 0.5336 | 2.6 | 0.0696 | 2.2 | 0.85 | 433.9 | 9.1 | 434.2 | 9.1  | 435.9  | 30.4  | 433.9 | 9.1 |
| Duke-Spot 230 | 244  | 90169    | 2.4  | 18.0170 | 0.9 | 0.5327 | 1.5 | 0.0696 | 1.2 | 0.79 | 434.0 | 5.0 | 433.6 | 5.3  | 431.6  | 20.5  | 434.0 | 5.0 |
| Duke-Spot 313 | 133  | 162469   | 1.6  | 17.9534 | 1.3 | 0.5359 | 1.8 | 0.0698 | 1.2 | 0.67 | 435.0 | 5.0 | 435.7 | 6.3  | 439.4  | 29.4  | 435.0 | 5.0 |
| Duke-Spot 171 | 87   | 51216    | 1.8  | 18.0308 | 1.4 | 0.5337 | 2.1 | 0.0698 | 1.6 | 0.76 | 435.1 | 6.7 | 434.3 | 7.4  | 429.8  | 30.5  | 435.1 | 6.7 |
| Duke-Spot 26  | 356  | 161949   | 2.6  | 17.7704 | 1.0 | 0.5416 | 1.9 | 0.0698 | 1.7 | 0.87 | 435.2 | 7.0 | 439.5 | 6.9  | 462.2  | 21.4  | 435.2 | 7.0 |
| Duke-Spot 88  | 230  | 10612    | 1.6  | 18.6145 | 1.0 | 0.5183 | 1.6 | 0.0700 | 1.2 | 0.75 | 436.2 | 5.0 | 424.0 | 5.5  | 358.4  | 23.7  | 436.2 | 5.0 |
| Duke-Spot 105 | 972  | 1094612  | 2.9  | 17.9537 | 0.9 | 0.5379 | 1.9 | 0.0701 | 1.7 | 0.89 | 436.6 | 7.2 | 437.0 | 6.8  | 439.4  | 19.6  | 436.6 | 7.2 |
| Duke-Spot 228 | 131  | 64778    | 3.5  | 18.1296 | 1.1 | 0.5329 | 1.7 | 0.0701 | 1.4 | 0.78 | 436.8 | 5.7 | 433.7 | 6.1  | 417.7  | 24.5  | 436.8 | 5.7 |
| Duke-Spot 236 | 590  | 277647   | 1.7  | 17.9542 | 0.8 | 0.5384 | 2.1 | 0.0701 | 1.9 | 0.92 | 43    |     |       |      |        |       |       |     |

|               |      |         |      |         |     |        |     |        |     |      |        |      |        |      |        |      |        |      |
|---------------|------|---------|------|---------|-----|--------|-----|--------|-----|------|--------|------|--------|------|--------|------|--------|------|
| Duke-Spot 71  | 444  | 261382  | 3.1  | 17.8755 | 0.9 | 0.5481 | 1.8 | 0.0711 | 1.6 | 0.86 | 442.8  | 6.8  | 443.8  | 6.6  | 449.1  | 20.9 | 442.8  | 6.8  |
| Duke-Spot 234 | 161  | 36510   | 1.6  | 18.0799 | 1.3 | 0.5420 | 1.7 | 0.0711 | 1.1 | 0.65 | 442.8  | 4.6  | 439.7  | 6.0  | 423.8  | 28.4 | 442.8  | 4.6  |
| Duke-Spot 278 | 237  | 176179  | 2.8  | 17.9119 | 1.0 | 0.5475 | 1.7 | 0.0712 | 1.3 | 0.78 | 443.2  | 5.6  | 443.4  | 6.0  | 444.6  | 23.3 | 443.2  | 5.6  |
| Duke-Spot 248 | 136  | 18871   | 2.0  | 18.0993 | 1.2 | 0.5432 | 1.8 | 0.0713 | 1.3 | 0.72 | 444.2  | 5.5  | 440.5  | 6.3  | 421.4  | 27.6 | 444.2  | 5.5  |
| Duke-Spot 170 | 102  | 87413   | 2.3  | 18.0822 | 1.4 | 0.5439 | 2.2 | 0.0714 | 1.7 | 0.78 | 444.3  | 7.3  | 441.0  | 7.8  | 423.5  | 30.7 | 444.3  | 7.3  |
| Duke-Spot 262 | 636  | 212195  | 2.3  | 17.8622 | 0.7 | 0.5515 | 1.9 | 0.0715 | 1.8 | 0.92 | 445.1  | 7.6  | 446.0  | 6.9  | 450.7  | 16.3 | 445.1  | 7.6  |
| Duke-Spot 160 | 182  | 24031   | 1.8  | 18.2577 | 0.9 | 0.5399 | 1.6 | 0.0715 | 1.3 | 0.84 | 445.4  | 5.7  | 438.4  | 5.6  | 401.9  | 19.1 | 445.4  | 5.7  |
| Duke-Spot 151 | 110  | 90701   | 2.7  | 18.1111 | 1.5 | 0.5444 | 2.1 | 0.0715 | 1.4 | 0.67 | 445.4  | 6.0  | 441.3  | 7.4  | 419.9  | 34.0 | 445.4  | 6.0  |
| Duke-Spot 46  | 190  | 81427   | 3.2  | 17.9040 | 1.0 | 0.5512 | 1.3 | 0.0716 | 0.9 | 0.68 | 445.8  | 3.9  | 445.8  | 4.8  | 445.6  | 21.8 | 445.8  | 3.9  |
| Duke-Spot 36  | 189  | 38458   | 4.1  | 17.6822 | 1.0 | 0.5604 | 1.6 | 0.0719 | 1.2 | 0.76 | 447.6  | 5.2  | 451.8  | 5.8  | 473.2  | 23.1 | 447.6  | 5.2  |
| Duke-Spot 153 | 104  | 24207   | 2.8  | 18.1001 | 1.4 | 0.5477 | 1.9 | 0.0719 | 1.3 | 0.68 | 447.8  | 5.5  | 443.5  | 6.7  | 421.3  | 30.6 | 447.8  | 5.5  |
| Duke-Spot 249 | 213  | 45940   | 4.0  | 18.1863 | 1.5 | 0.5451 | 2.5 | 0.0719 | 2.0 | 0.79 | 447.8  | 8.6  | 441.8  | 9.1  | 410.7  | 34.6 | 447.8  | 8.6  |
| Duke-Spot 304 | 315  | 57368   | 2.0  | 17.7988 | 1.1 | 0.5573 | 2.1 | 0.0720 | 1.8 | 0.86 | 448.1  | 7.8  | 449.8  | 7.6  | 458.7  | 23.7 | 448.1  | 7.8  |
| Duke-Spot 164 | 349  | 169677  | 2.8  | 18.2517 | 0.9 | 0.5436 | 1.8 | 0.0720 | 1.6 | 0.86 | 448.1  | 6.7  | 440.8  | 6.5  | 402.6  | 20.4 | 448.1  | 6.7  |
| Duke-Spot 82  | 165  | 108237  | 1.9  | 17.8719 | 1.0 | 0.5568 | 1.5 | 0.0722 | 1.2 | 0.77 | 449.4  | 5.1  | 449.4  | 5.6  | 449.5  | 21.9 | 449.4  | 5.1  |
| Duke-Spot 117 | 68   | 11470   | 1.5  | 17.7277 | 1.9 | 0.5618 | 2.3 | 0.0723 | 1.2 | 0.54 | 449.8  | 5.4  | 452.7  | 8.4  | 467.5  | 43.2 | 449.8  | 5.4  |
| Duke-Spot 2   | 51   | 15344   | 2.4  | 15.7981 | 2.4 | 0.6311 | 3.3 | 0.0723 | 2.3 | 0.69 | 450.3  | 10.0 | 496.8  | 13.1 | 717.3  | 51.6 | 450.3  | 10.0 |
| Duke-Spot 284 | 121  | 30751   | 3.5  | 18.3038 | 1.3 | 0.5452 | 1.7 | 0.0724 | 1.1 | 0.67 | 450.7  | 5.0  | 441.9  | 6.1  | 396.3  | 28.4 | 450.7  | 5.0  |
| Duke-Spot 241 | 739  | 249015  | 14.4 | 17.8346 | 1.0 | 0.5597 | 2.1 | 0.0724 | 1.8 | 0.88 | 450.7  | 7.9  | 451.3  | 7.5  | 454.2  | 21.3 | 450.7  | 7.9  |
| Duke-Spot 0   | 154  | 8313    | 4.8  | 16.5347 | 2.2 | 0.6043 | 2.7 | 0.0725 | 1.6 | 0.57 | 451.2  | 6.8  | 480.0  | 10.4 | 619.8  | 48.2 | 451.2  | 6.8  |
| Duke-Spot 217 | 111  | 41982   | 1.7  | 17.8905 | 1.2 | 0.5587 | 1.7 | 0.0725 | 1.2 | 0.69 | 451.3  | 5.0  | 450.7  | 6.1  | 447.2  | 26.8 | 451.3  | 5.0  |
| Duke-Spot 296 | 181  | 91856   | 6.9  | 18.3197 | 1.1 | 0.5464 | 1.6 | 0.0726 | 1.2 | 0.72 | 452.0  | 5.1  | 442.6  | 5.8  | 394.3  | 25.3 | 452.0  | 5.1  |
| Duke-Spot 84  | 1907 | 1489779 | 2.3  | 17.7944 | 0.7 | 0.5631 | 1.5 | 0.0727 | 1.4 | 0.89 | 452.4  | 6.0  | 453.5  | 5.7  | 459.2  | 15.9 | 452.4  | 6.0  |
| Duke-Spot 291 | 148  | 33225   | 2.1  | 17.9429 | 1.1 | 0.5586 | 2.2 | 0.0727 | 1.9 | 0.86 | 452.5  | 8.4  | 450.6  | 8.1  | 440.7  | 25.4 | 452.5  | 8.4  |
| Duke-Spot 250 | 107  | 26879   | 2.7  | 18.0452 | 1.5 | 0.5563 | 2.0 | 0.0728 | 1.3 | 0.66 | 453.3  | 5.7  | 449.1  | 7.1  | 428.1  | 32.7 | 453.3  | 5.7  |
| Duke-Spot 279 | 449  | 88179   | 2.3  | 17.8563 | 0.9 | 0.5631 | 1.9 | 0.0730 | 1.7 | 0.89 | 454.0  | 7.3  | 453.6  | 6.8  | 451.5  | 19.1 | 454.0  | 7.3  |
| Duke-Spot 183 | 55   | 94068   | 5.6  | 17.9389 | 2.0 | 0.5608 | 2.5 | 0.0730 | 1.6 | 0.63 | 454.2  | 6.9  | 452.0  | 9.1  | 441.2  | 43.5 | 454.2  | 6.9  |
| Duke-Spot 68  | 335  | 85696   | 3.8  | 17.3843 | 1.3 | 0.5791 | 2.1 | 0.0731 | 1.7 | 0.80 | 454.5  | 7.4  | 463.9  | 7.9  | 510.7  | 28.0 | 454.5  | 7.4  |
| Duke-Spot 287 | 110  | 33221   | 2.1  | 16.3694 | 2.6 | 0.6177 | 2.9 | 0.0734 | 1.3 | 0.45 | 456.4  | 5.8  | 488.4  | 11.4 | 641.5  | 56.6 | 456.4  | 5.8  |
| Duke-Spot 266 | 45   | 15191   | 1.4  | 18.0874 | 3.0 | 0.5590 | 4.7 | 0.0734 | 3.6 | 0.77 | 456.4  | 15.9 | 450.9  | 17.0 | 422.9  | 66.6 | 456.4  | 15.9 |
| Duke-Spot 75  | 68   | 15423   | 5.7  | 18.3200 | 1.7 | 0.5535 | 2.1 | 0.0736 | 1.2 | 0.57 | 457.7  | 5.2  | 447.3  | 7.5  | 394.3  | 38.3 | 457.7  | 5.2  |
| Duke-Spot 76  | 405  | 83804   | 3.2  | 18.0224 | 0.7 | 0.5640 | 1.6 | 0.0738 | 1.5 | 0.90 | 458.7  | 6.5  | 454.1  | 5.9  | 430.9  | 15.6 | 458.7  | 6.5  |
| Duke-Spot 41  | 126  | 17185   | 5.0  | 18.0429 | 1.3 | 0.5658 | 1.8 | 0.0741 | 1.3 | 0.71 | 460.6  | 5.7  | 455.3  | 6.6  | 428.3  | 27.9 | 460.6  | 5.7  |
| Duke-Spot 191 | 412  | 60732   | 2.8  | 17.7474 | 0.9 | 0.5785 | 1.8 | 0.0745 | 1.6 | 0.87 | 463.2  | 7.2  | 463.5  | 6.9  | 465.1  | 20.4 | 463.2  | 7.2  |
| Duke-Spot 229 | 133  | 28001   | 1.8  | 18.2096 | 1.2 | 0.5639 | 2.0 | 0.0745 | 1.6 | 0.80 | 463.3  | 7.1  | 454.1  | 7.2  | 407.8  | 26.3 | 463.3  | 7.1  |
| Duke-Spot 60  | 115  | 61948   | 4.7  | 18.0514 | 1.2 | 0.5689 | 2.0 | 0.0745 | 1.6 | 0.78 | 463.3  | 6.9  | 457.3  | 7.3  | 427.3  | 27.9 | 463.3  | 6.9  |
| Duke-Spot 283 | 225  | 1203253 | 2.8  | 17.7355 | 1.3 | 0.5794 | 2.0 | 0.0746 | 1.4 | 0.73 | 463.6  | 6.4  | 464.1  | 7.3  | 466.6  | 29.9 | 463.6  | 6.4  |
| Duke-Spot 282 | 223  | 26661   | 2.2  | 17.8429 | 1.0 | 0.5769 | 1.6 | 0.0747 | 1.2 | 0.78 | 464.3  | 5.6  | 462.5  | 5.9  | 453.2  | 21.8 | 464.3  | 5.6  |
| Duke-Spot 161 | 384  | 31775   | 2.4  | 18.0763 | 1.1 | 0.5722 | 2.1 | 0.0750 | 1.8 | 0.85 | 466.5  | 8.0  | 459.4  | 7.8  | 424.2  | 24.7 | 466.5  | 8.0  |
| Duke-Spot 213 | 582  | 98479   | 3.0  | 17.7866 | 1.0 | 0.5831 | 2.2 | 0.0752 | 2.0 | 0.90 | 467.7  | 8.9  | 466.4  | 8.3  | 460.2  | 21.8 | 467.7  | 8.9  |
| Duke-Spot 260 | 239  | 71468   | 2.9  | 17.7937 | 1.0 | 0.5844 | 1.7 | 0.0755 | 1.3 | 0.80 | 468.9  | 6.1  | 467.3  | 6.3  | 459.3  | 22.2 | 468.9  | 6.1  |
| Duke-Spot 149 | 450  | 125594  | 5.1  | 17.5217 | 1.3 | 0.5941 | 2.4 | 0.0755 | 2.0 | 0.84 | 469.4  | 9.2  | 473.5  | 9.1  | 493.3  | 28.6 | 469.4  | 9.2  |
| Duke-Spot 179 | 59   | 11406   | 3.8  | 18.2934 | 1.9 | 0.5693 | 2.7 | 0.0756 | 1.9 | 0.71 | 469.6  | 8.8  | 457.5  | 10.0 | 397.5  | 42.6 | 469.6  | 8.8  |
| Duke-Spot 17  | 217  | 93146   | 2.5  | 17.9882 | 1.1 | 0.5790 | 1.8 | 0.0756 | 1.4 | 0.79 | 469.6  | 6.3  | 463.8  | 6.6  | 435.1  | 24.4 | 469.6  | 6.3  |
| Duke-Spot 286 | 155  | 7024    | 2.6  | 14.9867 | 3.7 | 0.6963 | 4.0 | 0.0757 | 1.5 | 0.38 | 470.5  | 6.9  | 536.6  | 16.9 | 828.3  | 78.1 | 470.5  | 6.9  |
| Duke-Spot 16  | 227  | 30447   | 2.2  | 17.6929 | 1.1 | 0.5964 | 1.6 | 0.0766 | 1.2 | 0.75 | 475.6  | 5.5  | 475.0  | 6.1  | 471.9  | 23.7 | 475.6  | 5.5  |
| Duke-Spot 292 | 169  | 34141   | 3.8  | 18.5883 | 1.0 | 0.5679 | 1.7 | 0.0766 | 1.3 | 0.80 | 475.8  | 6.1  | 456.7  | 6.1  | 361.6  | 22.8 | 475.8  | 6.1  |
| Duke-Spot 12  | 308  | 26583   | 2.6  | 17.7257 | 0.8 | 0.6049 | 1.9 | 0.0778 | 1.7 | 0.90 | 483.0  | 7.7  | 480.4  | 7.1  | 467.8  | 18.0 | 483.0  | 7.7  |
| Duke-Spot 259 | 242  | 85266   | 3.0  | 17.5943 | 1.0 | 0.6138 | 1.7 | 0.0784 | 1.4 | 0.82 | 486.3  | 6.6  | 486.0  | 6.7  | 484.3  | 22.0 | 486.3  | 6.6  |
| Duke-Spot 67  | 393  | 135808  | 1.5  | 17.7241 | 0.9 | 0.6110 | 1.7 | 0.0786 | 1.4 | 0.83 | 487.6  | 6.5  | 484.2  | 6.4  | 468.0  | 20.5 | 487.6  | 6.5  |
| Duke-Spot 167 | 181  | 95036   | 3.3  | 18.3289 | 0.9 | 0.6016 | 1.5 | 0.0800 | 1.2 | 0.79 | 496.1  | 5.8  | 478.2  | 5.8  | 393.2  | 21.0 | 496.1  | 5.8  |
| Duke-Spot 118 | 570  | 88372   | 3.4  | 15.4033 | 2.2 | 0.7317 | 3.3 | 0.0818 | 2.5 | 0.74 | 506.7  | 12.1 | 557.6  | 14.3 | 770.8  | 47.1 | 506.7  | 12.1 |
| Duke-Spot 306 | 88   | 21118   | 1.3  | 16.5582 | 1.4 | 0.7580 | 1.9 | 0.0911 | 1.3 | 0.68 | 561.9  | 6.8  | 572.9  | 8.1  | 616.7  | 29.3 | 561.9  | 6.8  |
| Duke-Spot 264 | 299  | 67738   | 1.7  | 15.2076 | 0.9 | 1.1807 | 1.9 | 0.1303 | 1.7 | 0.88 | 789.5  | 12.4 | 791.6  | 10.4 | 797.7  | 19.1 | 789.5  | 12.4 |
| Duke-Spot 27  | 392  | 3371579 | 1.7  | 15.0847 | 0.8 | 1.2045 | 1.8 | 0.1318 | 1.5 | 0.88 | 798.3  | 11.6 | 802.7  | 9.7  | 814.7  | 17.6 | 798.3  | 11.6 |
| Duke-Spot 303 | 808  | 455093  | 1.3  | 14.9077 | 0.8 | 1.2203 | 1.9 | 0.1320 | 1.7 | 0.89 | 799.2  | 12.5 | 809.9  | 10.4 | 839.3  | 17.6 | 799.2  | 12.5 |
| Duke-Spot 165 | 34   | 39214   | 1.1  | 14.4380 | 1.8 | 1.2784 | 2.4 | 0.1339 | 1.6 | 0.66 | 810.2  | 12.0 | 836.2  | 13.6 | 905.6  | 36.8 | 810.2  | 12.0 |
| Duke-Spot 181 | 133  | 75477   | 2.0  | 14.9303 | 0.8 | 1.3141 | 1.5 | 0.1424 | 1.2 | 0.82 | 858.0  | 9.8  | 851.9  | 8.5  | 836.2  | 17.6 | 858.0  | 9.8  |
| Duke-Spot 128 | 271  | 98176   | 19.8 | 13.0827 | 1.0 | 1.9075 | 1.8 | 0.1811 | 1.6 | 0.84 | 1072.8 | 15.3 | 1083.7 | 12.3 | 1105.6 | 19.8 | 1105.6 | 19.8 |
| Duke-Spot 90  | 60   | 64925   | 3.1  | 12.5605 | 1.0 | 2.2467 | 1.8 | 0.2048 | 1.5 | 0.83 | 1200.8 | 16.3 | 1195.8 | 12.6 | 1186.6 | 19.7 | 1186.6 | 19.7 |
| Duke-Spot 89  | 665  | 548042  | 3.6  | 12.1931 | 1.1 | 2.3846 | 2.0 | 0.2110 | 1.8 | 0.86 | 1234.0 | 19.8 | 1238.0 | 14.7 | 1245.0 | 20.6 | 1245.0 | 20.6 |
| Duke-Spot 79  | 861  | 79400   | 4.4  | 12.0440 | 1.0 | 2.1604 | 2.0 | 0.1888 | 1.7 | 0.87 | 1114.9 | 17.6 | 1168.4 | 13.7 | 1269.0 | 19.2 | 1269.0 | 19.2 |
| Duke-Spot 10  | 55   | 45027   | 2.3  | 11.9961 | 1.2 | 2.3781 | 1.8 | 0.2070 | 1.3 | 0.73 | 1212.8 | 14.6 | 1236.1 | 12.8 | 1276.8 | 23.7 | 1276.8 | 23.7 |
| Duke-Spot 61  | 181  | 81076   | 2.6  | 11.7312 | 0.8 | 2.6886 | 1.5 | 0.2288 | 1.3 | 0.86 | 1328.5 | 15.1 | 1325.3 | 10.9 | 1320.2 | 14.7 | 1320.2 | 14.7 |
| Duke-Spot 162 | 187  | 88263   | 5.0  | 11.3171 | 1.0 | 2.8912 | 1.5 | 0.2374 | 1.2 | 0.77 | 1373.2 | 14.4 | 1379.6 | 11.4 | 1389.5 | 18.6 | 1389.5 | 18.6 |
| Duke-Spot 83  | 106  | 44789   | 3.3  | 11.0830 | 1.0 | 2.8354 | 2.0 | 0.2280 | 1.7 | 0.85 | 1324.1 | 20.2 | 1364.9 | 14.9 | 1429.5 | 19.8 | 1429.5 | 19.8 |
| Duke-Spot 214 | 52   | 322414  | 4.5  | 11.0757 | 0.9 | 3.1608 | 1.5 | 0.2540 | 1.2 | 0.78 | 1459.1 | 15.6 | 1447.6 | 11.7 | 1430.8 | 18.1 | 1430.8 | 18.1 |
| Duke-Spot 64  | 388  | 769     |      |         |     |        |     |        |     |      |        |      |        |      |        |      |        |      |

|                  |      |          |      |         |       |         |       |        |     |      |        |      |        |      |        |       |        |      |
|------------------|------|----------|------|---------|-------|---------|-------|--------|-----|------|--------|------|--------|------|--------|-------|--------|------|
| Duke-Spot 74     | 410  | 275154   | 2.8  | 9.3377  | 1.0   | 4.5245  | 1.8   | 0.3065 | 1.5 | 0.83 | 1723.7 | 23.2 | 1735.5 | 15.4 | 1749.7 | 18.8  | 1749.7 | 18.8 |
| Duke-Spot 136    | 320  | 117978   | 2.1  | 9.2835  | 1.0   | 4.5008  | 1.9   | 0.3032 | 1.7 | 0.86 | 1707.0 | 24.8 | 1731.1 | 15.9 | 1760.4 | 17.6  | 1760.4 | 17.6 |
| Duke-Spot 38     | 166  | 109392   | 6.5  | 9.2765  | 0.8   | 4.5331  | 1.4   | 0.3051 | 1.2 | 0.83 | 1716.6 | 17.4 | 1737.1 | 11.6 | 1761.7 | 14.4  | 1761.7 | 14.4 |
| Duke-Spot 135    | 137  | 40556    | 2.7  | 9.1979  | 1.1   | 4.4855  | 1.6   | 0.2994 | 1.2 | 0.76 | 1688.1 | 18.4 | 1728.3 | 13.5 | 1777.3 | 19.3  | 1777.3 | 19.3 |
| Duke-Spot 81     | 217  | 1052043  | 1.7  | 9.1460  | 1.0   | 4.5673  | 1.7   | 0.3031 | 1.4 | 0.81 | 1706.7 | 20.9 | 1743.3 | 14.3 | 1787.6 | 18.3  | 1787.6 | 18.3 |
| Duke-Spot 101    | 115  | 3221906  | 1.5  | 9.0587  | 0.7   | 4.8249  | 1.4   | 0.3171 | 1.2 | 0.85 | 1775.7 | 18.2 | 1789.3 | 11.7 | 1805.1 | 13.4  | 1805.1 | 13.4 |
| Duke-Spot 143    | 7    | 2156     | 32.8 | 8.9735  | 1.5   | 4.4497  | 2.7   | 0.2897 | 2.2 | 0.83 | 1640.1 | 32.2 | 1721.6 | 22.2 | 1822.2 | 27.1  | 1822.2 | 27.1 |
| Duke-Spot 254    | 689  | 550848   | 3.5  | 8.9470  | 0.8   | 4.5170  | 1.6   | 0.2932 | 1.4 | 0.85 | 1657.7 | 20.2 | 1734.1 | 13.5 | 1827.6 | 15.2  | 1827.6 | 15.2 |
| Duke-Spot 134    | 404  | 331817   | 4.5  | 8.8995  | 0.8   | 5.0605  | 1.8   | 0.3268 | 1.6 | 0.89 | 1822.7 | 25.5 | 1829.5 | 15.3 | 1837.2 | 14.8  | 1837.2 | 14.8 |
| Duke-Spot 178    | 298  | 1163115  | 4.3  | 8.7684  | 0.9   | 4.9946  | 2.0   | 0.3178 | 1.8 | 0.91 | 1778.8 | 28.5 | 1818.4 | 17.1 | 1864.1 | 15.5  | 1864.1 | 15.5 |
| Duke-Spot 173    | 130  | 108708   | 3.9  | 8.6202  | 1.1   | 5.5154  | 1.7   | 0.3450 | 1.3 | 0.77 | 1910.5 | 22.1 | 1903.0 | 15.0 | 1894.8 | 20.0  | 1894.8 | 20.0 |
| Duke-Spot 290    | 110  | 187531   | 3.1  | 8.5760  | 1.0   | 5.4245  | 1.5   | 0.3375 | 1.2 | 0.76 | 1874.8 | 18.9 | 1888.7 | 13.2 | 1904.0 | 18.0  | 1904.0 | 18.0 |
| Duke-Spot 281    | 42   | 36000    | 3.6  | 8.5690  | 1.0   | 5.3859  | 1.5   | 0.3349 | 1.2 | 0.77 | 1861.9 | 19.0 | 1882.6 | 13.1 | 1905.5 | 17.6  | 1905.5 | 17.6 |
| Duke-Spot 189    | 145  | 115561   | 4.4  | 8.5651  | 0.8   | 5.5470  | 1.4   | 0.3447 | 1.1 | 0.79 | 1909.4 | 18.1 | 1907.9 | 11.9 | 1906.3 | 15.2  | 1906.3 | 15.2 |
| Duke-Spot 25     | 506  | 210587   | 1.4  | 8.5367  | 0.8   | 5.0080  | 1.3   | 0.3102 | 1.1 | 0.82 | 1741.7 | 16.7 | 1820.7 | 11.3 | 1912.3 | 13.5  | 1912.3 | 13.5 |
| Duke-Spot 222    | 989  | 832824   | 2.4  | 8.5283  | 0.8   | 4.6967  | 1.7   | 0.2906 | 1.5 | 0.89 | 1644.7 | 22.1 | 1766.7 | 14.4 | 1914.0 | 14.3  | 1914.0 | 14.3 |
| Duke-Spot 289    | 144  | 31740    | 2.8  | 8.5033  | 1.3   | 5.4150  | 1.8   | 0.3341 | 1.3 | 0.70 | 1858.2 | 20.4 | 1887.2 | 15.4 | 1919.3 | 22.9  | 1919.3 | 22.9 |
| Duke-Spot 203    | 250  | 91197    | 1.2  | 8.4934  | 1.0   | 5.6769  | 1.8   | 0.3498 | 1.5 | 0.84 | 1933.9 | 25.3 | 1927.9 | 15.5 | 1921.4 | 17.3  | 1921.4 | 17.3 |
| Duke-Spot 108    | 198  | 34582    | 4.6  | 8.4489  | 0.8   | 5.0937  | 1.3   | 0.3123 | 1.0 | 0.79 | 1751.8 | 15.7 | 1835.1 | 11.0 | 1930.8 | 14.3  | 1930.8 | 14.3 |
| Duke-Spot 78     | 484  | 85215    | 2.2  | 8.3912  | 0.7   | 4.4915  | 1.5   | 0.2735 | 1.4 | 0.88 | 1558.4 | 18.8 | 1729.4 | 12.8 | 1943.1 | 13.0  | 1943.1 | 13.0 |
| Duke-Spot 174    | 616  | 100431   | 8.4  | 8.3632  | 0.8   | 4.6737  | 1.9   | 0.2836 | 1.7 | 0.90 | 1609.5 | 24.0 | 1762.6 | 15.7 | 1949.0 | 14.9  | 1949.0 | 14.9 |
| Duke-Spot 305    | 103  | 88513    | 6.5  | 8.2909  | 1.0   | 4.7254  | 1.7   | 0.2843 | 1.4 | 0.83 | 1612.8 | 20.1 | 1771.8 | 14.3 | 1964.5 | 17.0  | 1964.5 | 17.0 |
| Duke-Spot 168    | 163  | 233002   | 2.9  | 8.2530  | 0.8   | 5.9710  | 1.2   | 0.3576 | 0.9 | 0.76 | 1970.6 | 15.3 | 1971.6 | 10.3 | 1972.7 | 13.6  | 1972.7 | 13.6 |
| Duke-Spot 148    | 154  | 128057   | 7.6  | 8.2381  | 0.9   | 6.0875  | 1.4   | 0.3639 | 1.1 | 0.76 | 2000.5 | 18.7 | 1988.5 | 12.5 | 1975.9 | 16.7  | 1975.9 | 16.7 |
| Duke-Spot 301    | 107  | 68593    | 5.9  | 8.2166  | 1.1   | 5.9594  | 1.6   | 0.3553 | 1.1 | 0.73 | 1959.8 | 19.1 | 1969.9 | 13.6 | 1980.6 | 19.1  | 1980.6 | 19.1 |
| Duke-Spot 269    | 154  | 359875   | 2.9  | 8.1815  | 1.1   | 6.1302  | 1.8   | 0.3639 | 1.4 | 0.78 | 2000.7 | 24.5 | 1994.6 | 15.8 | 1988.2 | 20.0  | 1988.2 | 20.0 |
| Duke-Spot 53     | 208  | 358817   | 1.8  | 8.1723  | 0.8   | 6.0836  | 1.6   | 0.3607 | 1.4 | 0.88 | 1985.7 | 24.7 | 1987.9 | 14.3 | 1990.2 | 13.7  | 1990.2 | 13.7 |
| Duke-Spot 3      | 1235 | 6164     | 3.9  | 8.0789  | 4.8   | 1.3025  | 5.4   | 0.0764 | 2.4 | 0.44 | 474.3  | 10.9 | 846.8  | 30.9 | 2010.6 | 85.7  | 2010.6 | 85.7 |
| Duke-Spot 297    | 189  | 110710   | 4.2  | 8.0540  | 0.7   | 6.0363  | 1.3   | 0.3527 | 1.1 | 0.86 | 1947.7 | 18.7 | 1981.1 | 11.3 | 2016.1 | 11.7  | 2016.1 | 11.7 |
| Duke-Spot 139    | 295  | 146393   | 10.6 | 7.9409  | 0.8   | 6.2764  | 2.2   | 0.3616 | 2.1 | 0.94 | 1989.9 | 35.9 | 2015.2 | 19.6 | 2041.1 | 13.9  | 2041.1 | 13.9 |
| Duke-Spot 274    | 322  | 406996   | 5.1  | 7.9274  | 0.8   | 6.4696  | 1.9   | 0.3721 | 1.7 | 0.91 | 2039.4 | 30.2 | 2041.8 | 16.7 | 2044.1 | 13.9  | 2044.1 | 13.9 |
| Duke-Spot 125    | 193  | 136813   | 2.4  | 7.8495  | 1.1   | 6.5476  | 1.6   | 0.3729 | 1.2 | 0.75 | 2043.1 | 21.4 | 2052.3 | 14.3 | 2061.6 | 18.8  | 2061.6 | 18.8 |
| Duke-Spot 302    | 140  | 1394726  | 3.2  | 7.8239  | 0.8   | 6.7904  | 1.4   | 0.3855 | 1.1 | 0.82 | 2101.9 | 20.5 | 2084.5 | 12.4 | 2067.3 | 14.2  | 2067.3 | 14.2 |
| Duke-Spot 58     | 44   | 99303    | 2.0  | 7.7712  | 0.9   | 6.8360  | 1.3   | 0.3855 | 1.0 | 0.74 | 2101.7 | 17.7 | 2090.4 | 11.8 | 2079.2 | 15.7  | 2079.2 | 15.7 |
| Duke-Spot 285    | 670  | 667715   | 3.9  | 7.6042  | 1.0   | 5.4477  | 2.0   | 0.3006 | 1.8 | 0.86 | 1694.2 | 26.1 | 1892.4 | 17.5 | 2117.4 | 18.3  | 2117.4 | 18.3 |
| Duke-Spot 103    | 133  | 114567   | 2.4  | 7.3137  | 1.1   | 7.4950  | 1.8   | 0.3977 | 1.4 | 0.78 | 2158.6 | 25.2 | 2172.4 | 15.8 | 2185.4 | 19.3  | 2185.4 | 19.3 |
| Duke-Spot 194    | 156  | 30120    | 3.1  | 6.5576  | 0.9   | 7.9854  | 1.8   | 0.3800 | 1.6 | 0.88 | 2076.1 | 28.8 | 2229.4 | 16.6 | 2373.3 | 14.8  | 2373.3 | 14.8 |
| Duke-Spot 52     | 1257 | 2734482  | 31.2 | 6.2052  | 0.6   | 8.4235  | 1.8   | 0.3793 | 1.7 | 0.94 | 2072.8 | 30.8 | 2277.7 | 16.8 | 2467.1 | 10.7  | 2467.1 | 10.7 |
| Duke-Spot 176    | 219  | 331962   | 1.8  | 6.0876  | 1.0   | 10.4512 | 1.6   | 0.4616 | 1.2 | 0.75 | 2446.8 | 24.0 | 2475.6 | 14.5 | 2499.3 | 17.3  | 2499.3 | 17.3 |
| Duke-Spot 126    | 131  | 520992   | 2.3  | 6.0330  | 0.8   | 10.6546 | 1.5   | 0.4664 | 1.3 | 0.87 | 2467.7 | 27.2 | 2493.5 | 14.2 | 2514.5 | 12.9  | 2514.5 | 12.9 |
| Duke-Spot 215    | 529  | 84837    | 5.9  | 5.8921  | 0.8   | 10.2318 | 1.7   | 0.4374 | 1.4 | 0.87 | 2339.1 | 28.2 | 2456.0 | 15.3 | 2554.1 | 13.7  | 2554.1 | 13.7 |
| Duke-Spot 312    | 136  | 127111   | 2.4  | 5.7397  | 0.8   | 11.5090 | 1.5   | 0.4793 | 1.2 | 0.82 | 2524.2 | 25.4 | 2565.3 | 13.8 | 2597.9 | 14.1  | 2597.9 | 14.1 |
| Duke-Spot 43     | 75   | 236161   | 1.1  | 5.6864  | 0.9   | 11.9174 | 1.5   | 0.4917 | 1.2 | 0.79 | 2578.1 | 25.0 | 2597.9 | 14.0 | 2613.5 | 15.3  | 2613.5 | 15.3 |
| Duke-Spot 98     | 181  | 132898   | 2.7  | 5.4165  | 0.8   | 13.0519 | 1.7   | 0.5130 | 1.4 | 0.86 | 2669.2 | 31.5 | 2683.4 | 15.8 | 2694.1 | 13.9  | 2694.1 | 13.9 |
| Duke-Spot 235    | 98   | 117988   | 2.6  | 5.3737  | 0.9   | 12.7784 | 1.4   | 0.4982 | 1.1 | 0.75 | 2606.2 | 22.6 | 2663.5 | 13.2 | 2707.2 | 15.1  | 2707.2 | 15.1 |
| Duke-Spot 62     | 132  | 11610965 | 1.4  | 5.3322  | 0.9   | 13.3289 | 1.5   | 0.5157 | 1.2 | 0.81 | 2680.9 | 26.7 | 2703.2 | 14.2 | 2720.0 | 14.6  | 2720.0 | 14.6 |
| Duke-Spot 121    | 101  | 160661   | 1.7  | 5.3254  | 1.1   | 13.4094 | 1.8   | 0.5181 | 1.5 | 0.82 | 2691.3 | 33.0 | 2708.9 | 17.4 | 2722.1 | 17.5  | 2722.1 | 17.5 |
| Duke-Spot 9      | 83   | 136237   | 2.9  | 5.2740  | 0.9   | 13.2728 | 1.5   | 0.5079 | 1.1 | 0.77 | 2647.7 | 24.7 | 2699.3 | 14.0 | 2738.1 | 15.5  | 2738.1 | 15.5 |
| Duke-Spot 219    | 288  | 238764   | 2.8  | 5.1538  | 1.0   | 13.8248 | 1.9   | 0.5170 | 1.6 | 0.84 | 2686.4 | 36.0 | 2737.8 | 18.4 | 2775.9 | 17.0  | 2775.9 | 17.0 |
| Duke-Spot 33     | 372  | 89951    | 0.8  | 5.0742  | 1.0   | 12.7440 | 2.2   | 0.4692 | 1.9 | 0.89 | 2480.1 | 39.7 | 2660.9 | 20.4 | 2801.4 | 16.3  | 2801.4 | 16.3 |
| Duke-Spot 93     | 24   | 43607    | 4.2  | 4.9731  | 0.9   | 14.6792 | 1.8   | 0.5297 | 1.5 | 0.85 | 2740.1 | 33.3 | 2794.7 | 16.8 | 2834.3 | 15.4  | 2834.3 | 15.4 |
| Duke-Spot 177    | 436  | 298219   | 1.4  | 4.9664  | 0.8   | 13.4928 | 1.4   | 0.4862 | 1.1 | 0.80 | 2554.3 | 22.9 | 2714.8 | 12.8 | 2836.5 | 13.3  | 2836.5 | 13.3 |
| Duke-Spot 32     | 441  | 5872290  | 2.4  | 4.8310  | 1.0   | 14.7970 | 2.0   | 0.5187 | 1.7 | 0.85 | 2693.6 | 37.1 | 2802.3 | 18.8 | 2881.5 | 16.8  | 2881.5 | 16.8 |
| Hawkins River    |      |          |      |         |       |         |       |        |     |      |        |      |        |      |        |       |        |      |
| Hawkins-Spot 39  | 414  | 138      | 0.9  | 21.0885 | 14.5  | 0.0034  | 17.3  | 0.0005 | 9.5 | 0.55 | 3.4    | 0.3  | 3.5    | 0.6  | 70.4   | 345.4 | 3.4    | 0.3  |
| Hawkins-Spot 157 | 115  | 100      | 3.4  | 2.3747  | 51.0  | 0.0304  | 51.8  | 0.0005 | 8.7 | 0.17 | 3.4    | 0.3  | 30.4   | 15.5 | NA     | NA    | 3.4    | 0.3  |
| Hawkins-Spot 31  | 107  | 139      | 3.0  | 21.3229 | 50.1  | 0.0036  | 50.8  | 0.0006 | 8.6 | 0.17 | 3.6    | 0.3  | 3.7    | 1.9  | 44.0   | NA    | 3.6    | 0.3  |
| Hawkins-Spot 30  | 108  | 137      | 1.8  | 20.8961 | 7.9   | 0.0038  | 12.4  | 0.0006 | 9.6 | 0.77 | 3.7    | 0.4  | 3.8    | 0.5  | 92.2   | 186.8 | 3.7    | 0.4  |
| Hawkins-Spot 76  | 115  | 190      | 2.6  | 21.4952 | 97.8  | 0.0037  | 98.0  | 0.0006 | 6.7 | 0.07 | 3.8    | 0.3  | 3.8    | 3.7  | 24.8   | NA    | 3.8    | 0.3  |
| Hawkins-Spot 27  | 103  | 175      | 1.6  | 21.3781 | 24.8  | 0.0038  | 25.9  | 0.0006 | 7.6 | 0.29 | 3.8    | 0.3  | 3.9    | 1.0  | 37.8   | 600.7 | 3.8    | 0.3  |
| Hawkins-Spot 79  | 74   | 97       | 2.7  | 21.6374 | 106.3 | 0.0038  | 106.7 | 0.0006 | 9.4 | 0.09 | 3.8    | 0.4  | 3.8    | 4.1  | 8.9    | NA    | 3.8    | 0.4  |
| Hawkins-Spot 295 | 156  | 704      | 1.6  | 36.3827 | 7.5   | 0.0023  | 9.7   | 0.0006 | 6.2 | 0.64 | 4.0    | 0.2  | 2.4    | 0.2  | NA     | NA    | 4.0    | 0.2  |
| Hawkins-Spot 187 | 121  | 175      | 1.3  | 21.3797 | 29.9  | 0.0041  | 30.8  | 0.0006 | 7.3 | 0.24 | 4.1    | 0.3  | 4.1    | 1.3  | 37.6   | 729.7 | 4.1    | 0.3  |
| Hawkins-Spot 160 | 292  | 157      | 3.0  | 21.5579 | 97.4  | 0.0041  | 97.6  | 0.0006 | 4.9 | 0.05 | 4.1    | 0.2  | 4.1    | 4.0  | 17.7   | NA    | 4.1    | 0.2  |
| Hawkins-Spot 246 | 299  | 179      | 1.1  | 31.2328 | 83.6  | 0.0028  | 83.7  | 0.0006 | 3.8 | 0.05 | 4.2    | 0.2  | 2.9    | 2.4  | NA     | NA    | 4.2    | 0.2  |
| Hawkins-Spot 125 | 310  | 145      | 0.9  | 20.9759 | 27.6  | 0.0043  | 28.0  | 0.0006 | 4.7 | 0.17 | 4.2    | 0.2  | 4.3    | 1.2  | 83.1   | 667.2 | 4.2    | 0.2  |
| Hawkins-Spot 133 | 130  | 205      | 3.1  | 21.     |       |         |       |        |     |      |        |      |        |      |        |       |        |      |

|                  |      |     |     |         |       |        |       |        |     |      |     |     |      |     |        |        |     |     |
|------------------|------|-----|-----|---------|-------|--------|-------|--------|-----|------|-----|-----|------|-----|--------|--------|-----|-----|
| Hawkins-Spot 258 | 192  | 88  | 2.9 | 5.9076  | 14.0  | 0.0183 | 15.1  | 0.0008 | 5.8 | 0.38 | 5.0 | 0.3 | 18.4 | 2.8 | 2550.5 | 235.2  | 5.0 | 0.3 |
| Hawkins-Spot 262 | 59   | 84  | 4.2 | 5.1150  | 5.2   | 0.0211 | 9.1   | 0.0008 | 7.5 | 0.82 | 5.0 | 0.4 | 21.2 | 1.9 | NA     | NA     | 5.0 | 0.4 |
| Hawkins-Spot 189 | 236  | 57  | 0.8 | 19.4950 | 40.4  | 0.0055 | 41.1  | 0.0008 | 7.6 | 0.18 | 5.1 | 0.4 | 5.6  | 2.3 | 254.1  | 964.9  | 5.1 | 0.4 |
| Hawkins-Spot 250 | 178  | 87  | 3.7 | 6.0005  | 7.9   | 0.0181 | 9.4   | 0.0008 | 5.1 | 0.54 | 5.1 | 0.3 | 18.3 | 1.7 | 2524.3 | 133.1  | 5.1 | 0.3 |
| Hawkins-Spot 251 | 250  | 100 | 2.1 | 8.5086  | 38.9  | 0.0129 | 39.3  | 0.0008 | 5.3 | 0.13 | 5.1 | 0.3 | 13.0 | 5.1 | 1918.9 | 728.7  | 5.1 | 0.3 |
| Hawkins-Spot 194 | 323  | 137 | 2.9 | 21.2734 | 23.9  | 0.0052 | 24.4  | 0.0008 | 5.1 | 0.21 | 5.1 | 0.3 | 5.2  | 1.3 | 49.6   | 577.8  | 5.1 | 0.3 |
| Hawkins-Spot 52  | 197  | 128 | 2.4 | 20.9329 | 135.8 | 0.0052 | 135.9 | 0.0008 | 4.8 | 0.04 | 5.1 | 0.2 | 5.3  | 7.2 | 88.0   | NA     | 5.1 | 0.2 |
| Hawkins-Spot 65  | 815  | 162 | 2.0 | 20.9563 | 52.5  | 0.0052 | 52.6  | 0.0008 | 4.0 | 0.08 | 5.1 | 0.2 | 5.3  | 2.8 | 85.4   | NA     | 5.1 | 0.2 |
| Hawkins-Spot 195 | 127  | 111 | 3.5 | 20.9641 | 171.1 | 0.0052 | 171.1 | 0.0008 | 4.0 | 0.02 | 5.1 | 0.2 | 5.3  | 9.1 | 84.4   | NA     | 5.1 | 0.2 |
| Hawkins-Spot 313 | 138  | 106 | 3.0 | 25.2693 | 215.2 | 0.0044 | 215.3 | 0.0008 | 6.5 | 0.03 | 5.2 | 0.3 | 4.4  | 9.5 | NA     | NA     | 5.2 | 0.3 |
| Hawkins-Spot 9   | 256  | 135 | 2.1 | 20.9708 | 9.9   | 0.0053 | 10.5  | 0.0008 | 3.6 | 0.34 | 5.2 | 0.2 | 5.3  | 0.6 | 83.7   | 235.2  | 5.2 | 0.2 |
| Hawkins-Spot 154 | 168  | 123 | 3.4 | 21.1344 | 31.5  | 0.0052 | 31.9  | 0.0008 | 5.1 | 0.16 | 5.2 | 0.3 | 5.3  | 1.7 | 65.2   | 765.5  | 5.2 | 0.3 |
| Hawkins-Spot 156 | 193  | 178 | 2.3 | 21.3305 | 43.2  | 0.0052 | 43.5  | 0.0008 | 5.3 | 0.12 | 5.2 | 0.3 | 5.3  | 2.3 | 43.2   | 1077.4 | 5.2 | 0.3 |
| Hawkins-Spot 190 | 1736 | 93  | 0.6 | 21.3471 | 36.1  | 0.0052 | 36.6  | 0.0008 | 6.0 | 0.16 | 5.2 | 0.3 | 5.3  | 1.9 | 41.3   | 890.2  | 5.2 | 0.3 |
| Hawkins-Spot 87  | 335  | 150 | 2.2 | 20.9530 | 78.0  | 0.0053 | 78.1  | 0.0008 | 3.3 | 0.04 | 5.2 | 0.2 | 5.4  | 4.2 | 85.7   | NA     | 5.2 | 0.2 |
| Hawkins-Spot 128 | 232  | 166 | 3.0 | 21.1922 | 26.5  | 0.0053 | 26.9  | 0.0008 | 4.8 | 0.18 | 5.2 | 0.3 | 5.3  | 1.4 | 58.7   | 641.7  | 5.2 | 0.3 |
| Hawkins-Spot 272 | 236  | 154 | 2.0 | 23.7800 | 51.3  | 0.0047 | 51.5  | 0.0008 | 4.9 | 0.09 | 5.2 | 0.3 | 4.8  | 2.5 | NA     | NA     | 5.2 | 0.3 |
| Hawkins-Spot 66  | 891  | 167 | 1.9 | 20.9856 | 58.6  | 0.0053 | 58.6  | 0.0008 | 3.1 | 0.05 | 5.2 | 0.2 | 5.4  | 3.2 | 82.0   | NA     | 5.2 | 0.2 |
| Hawkins-Spot 184 | 407  | 160 | 1.7 | 21.5460 | 19.7  | 0.0052 | 20.2  | 0.0008 | 4.6 | 0.23 | 5.3 | 0.2 | 5.3  | 1.1 | 19.1   | 475.9  | 5.3 | 0.2 |
| Hawkins-Spot 137 | 127  | 130 | 2.8 | 21.2665 | 11.8  | 0.0053 | 14.1  | 0.0008 | 7.7 | 0.55 | 5.3 | 0.4 | 5.4  | 0.8 | 50.4   | 282.2  | 5.3 | 0.4 |
| Hawkins-Spot 151 | 272  | 160 | 2.4 | 21.4099 | 117.4 | 0.0053 | 117.5 | 0.0008 | 4.2 | 0.04 | 5.3 | 0.2 | 5.3  | 6.3 | 34.3   | NA     | 5.3 | 0.2 |
| Hawkins-Spot 217 | 219  | 146 | 2.7 | 21.0937 | 37.5  | 0.0053 | 37.7  | 0.0008 | 3.9 | 0.10 | 5.3 | 0.2 | 5.4  | 2.0 | 69.8   | 921.9  | 5.3 | 0.2 |
| Hawkins-Spot 162 | 269  | 144 | 3.0 | 21.2737 | 14.1  | 0.0053 | 14.6  | 0.0008 | 4.0 | 0.28 | 5.3 | 0.2 | 5.4  | 0.8 | 49.6   | 337.3  | 5.3 | 0.2 |
| Hawkins-Spot 131 | 224  | 155 | 2.3 | 21.5134 | 15.5  | 0.0053 | 16.2  | 0.0008 | 4.8 | 0.29 | 5.3 | 0.3 | 5.3  | 0.9 | 22.7   | 374.4  | 5.3 | 0.3 |
| Hawkins-Spot 228 | 260  | 156 | 2.9 | 20.7358 | 48.3  | 0.0055 | 48.5  | 0.0008 | 4.6 | 0.10 | 5.3 | 0.2 | 5.5  | 2.7 | 110.3  | 1205.8 | 5.3 | 0.2 |
| Hawkins-Spot 112 | 197  | 165 | 2.7 | 21.2776 | 9.0   | 0.0053 | 10.1  | 0.0008 | 4.6 | 0.45 | 5.3 | 0.2 | 5.4  | 0.5 | 49.1   | 215.4  | 5.3 | 0.2 |
| Hawkins-Spot 49  | 492  | 175 | 2.3 | 21.1882 | 51.7  | 0.0054 | 51.8  | 0.0008 | 3.0 | 0.06 | 5.3 | 0.2 | 5.4  | 2.8 | 59.2   | NA     | 5.3 | 0.2 |
| Hawkins-Spot 96  | 475  | 154 | 2.3 | 21.3165 | 11.0  | 0.0053 | 11.5  | 0.0008 | 3.4 | 0.29 | 5.3 | 0.2 | 5.4  | 0.6 | 44.8   | 263.4  | 5.3 | 0.2 |
| Hawkins-Spot 56  | 320  | 142 | 2.6 | 21.2640 | 22.8  | 0.0054 | 23.2  | 0.0008 | 4.2 | 0.18 | 5.3 | 0.2 | 5.4  | 1.3 | 50.7   | 550.6  | 5.3 | 0.2 |
| Hawkins-Spot 185 | 261  | 137 | 2.9 | 21.1753 | 13.1  | 0.0054 | 13.7  | 0.0008 | 4.0 | 0.30 | 5.3 | 0.2 | 5.5  | 0.7 | 60.6   | 312.2  | 5.3 | 0.2 |
| Hawkins-Spot 119 | 312  | 154 | 2.3 | 21.4298 | 28.2  | 0.0053 | 28.5  | 0.0008 | 4.0 | 0.14 | 5.4 | 0.2 | 5.4  | 1.5 | 32.1   | 687.7  | 5.4 | 0.2 |
| Hawkins-Spot 23  | 487  | 168 | 1.9 | 21.5527 | 86.3  | 0.0053 | 86.4  | 0.0008 | 4.7 | 0.05 | 5.4 | 0.3 | 5.4  | 4.6 | 18.4   | NA     | 5.4 | 0.3 |
| Hawkins-Spot 224 | 290  | 155 | 1.7 | 21.6722 | 9.3   | 0.0053 | 10.2  | 0.0008 | 4.2 | 0.41 | 5.4 | 0.2 | 5.4  | 0.5 | 5.0    | 225.4  | 5.4 | 0.2 |
| Hawkins-Spot 70  | 680  | 133 | 1.8 | 21.5607 | 14.0  | 0.0053 | 14.5  | 0.0008 | 3.8 | 0.26 | 5.4 | 0.2 | 5.4  | 0.8 | 17.4   | 337.3  | 5.4 | 0.2 |
| Hawkins-Spot 110 | 135  | 168 | 1.6 | 21.6633 | 112.3 | 0.0053 | 112.4 | 0.0008 | 5.7 | 0.05 | 5.4 | 0.3 | 5.4  | 6.0 | 6.1    | NA     | 5.4 | 0.3 |
| Hawkins-Spot 259 | 182  | 116 | 3.6 | 10.9219 | 32.7  | 0.0105 | 33.2  | 0.0008 | 6.0 | 0.18 | 5.4 | 0.3 | 10.6 | 3.5 | 1458.2 | 638.8  | 5.4 | 0.3 |
| Hawkins-Spot 165 | 591  | 175 | 1.5 | 20.9418 | 37.6  | 0.0055 | 37.8  | 0.0008 | 4.0 | 0.10 | 5.4 | 0.2 | 5.6  | 2.1 | 87.0   | 920.1  | 5.4 | 0.2 |
| Hawkins-Spot 153 | 226  | 154 | 3.0 | 21.6618 | 15.1  | 0.0053 | 15.9  | 0.0008 | 5.0 | 0.31 | 5.4 | 0.3 | 5.4  | 0.9 | 6.2    | 364.9  | 5.4 | 0.3 |
| Hawkins-Spot 309 | 268  | 130 | 3.2 | 13.1899 | 17.7  | 0.0087 | 18.4  | 0.0008 | 5.0 | 0.27 | 5.4 | 0.3 | 8.8  | 1.6 | 1090.2 | 358.0  | 5.4 | 0.3 |
| Hawkins-Spot 205 | 548  | 180 | 1.6 | 20.9872 | 102.1 | 0.0055 | 102.1 | 0.0008 | 3.4 | 0.03 | 5.4 | 0.2 | 5.6  | 5.7 | 81.8   | NA     | 5.4 | 0.2 |
| Hawkins-Spot 108 | 410  | 175 | 1.6 | 20.9269 | 10.8  | 0.0055 | 11.9  | 0.0008 | 5.1 | 0.43 | 5.4 | 0.3 | 5.6  | 0.7 | 88.7   | 256.9  | 5.4 | 0.3 |
| Hawkins-Spot 179 | 236  | 148 | 2.5 | 21.4299 | 66.9  | 0.0054 | 67.1  | 0.0008 | 4.9 | 0.07 | 5.4 | 0.3 | 5.5  | 3.7 | 32.1   | NA     | 5.4 | 0.3 |
| Hawkins-Spot 132 | 587  | 168 | 2.6 | 21.1642 | 20.1  | 0.0055 | 20.4  | 0.0008 | 3.5 | 0.17 | 5.4 | 0.2 | 5.5  | 1.1 | 61.9   | 483.2  | 5.4 | 0.2 |
| Hawkins-Spot 171 | 1049 | 174 | 0.9 | 21.8633 | 6.6   | 0.0054 | 7.5   | 0.0008 | 3.5 | 0.47 | 5.4 | 0.2 | 5.4  | 0.4 | 6.1    | 159.3  | 5.4 | 0.2 |
| Hawkins-Spot 208 | 461  | 158 | 2.5 | 21.5974 | 9.9   | 0.0054 | 10.6  | 0.0008 | 3.7 | 0.35 | 5.4 | 0.2 | 5.4  | 0.6 | 13.4   | 238.2  | 5.4 | 0.2 |
| Hawkins-Spot 196 | 167  | 145 | 2.8 | 21.5985 | 11.4  | 0.0054 | 12.6  | 0.0008 | 5.4 | 0.43 | 5.4 | 0.3 | 5.4  | 0.7 | 13.2   | 274.5  | 5.4 | 0.3 |
| Hawkins-Spot 126 | 465  | 175 | 2.3 | 21.0539 | 15.0  | 0.0055 | 15.6  | 0.0008 | 4.3 | 0.28 | 5.4 | 0.2 | 5.6  | 0.9 | 74.3   | 358.3  | 5.4 | 0.2 |
| Hawkins-Spot 74  | 209  | 150 | 2.4 | 20.9290 | 91.9  | 0.0056 | 91.9  | 0.0008 | 3.9 | 0.04 | 5.4 | 0.2 | 5.6  | 5.2 | 88.4   | NA     | 5.4 | 0.2 |
| Hawkins-Spot 81  | 390  | 156 | 2.3 | 21.0780 | 14.6  | 0.0055 | 15.0  | 0.0008 | 3.3 | 0.22 | 5.4 | 0.2 | 5.6  | 0.8 | 71.6   | 349.4  | 5.4 | 0.2 |
| Hawkins-Spot 60  | 190  | 125 | 2.6 | 21.0886 | 28.7  | 0.0055 | 29.2  | 0.0008 | 5.7 | 0.19 | 5.4 | 0.3 | 5.6  | 1.6 | 70.4   | 694.0  | 5.4 | 0.3 |
| Hawkins-Spot 41  | 309  | 175 | 1.9 | 21.3215 | 42.1  | 0.0055 | 42.4  | 0.0008 | 4.7 | 0.11 | 5.4 | 0.3 | 5.5  | 2.3 | 44.2   | 1048.0 | 5.4 | 0.3 |
| Hawkins-Spot 16  | 257  | 185 | 2.1 | 21.6735 | 19.8  | 0.0054 | 20.1  | 0.0008 | 3.7 | 0.19 | 5.5 | 0.2 | 5.5  | 1.1 | 4.9    | 480.4  | 5.5 | 0.2 |
| Hawkins-Spot 158 | 382  | 156 | 1.4 | 21.0569 | 11.0  | 0.0055 | 11.8  | 0.0008 | 4.2 | 0.36 | 5.5 | 0.2 | 5.6  | 0.7 | 74.0   | 262.2  | 5.5 | 0.2 |
| Hawkins-Spot 200 | 295  | 165 | 2.1 | 21.0486 | 82.3  | 0.0056 | 82.4  | 0.0008 | 3.8 | 0.05 | 5.5 | 0.2 | 5.6  | 4.6 | 74.9   | NA     | 5.5 | 0.2 |
| Hawkins-Spot 45  | 215  | 173 | 2.0 | 21.5576 | 40.4  | 0.0054 | 40.7  | 0.0008 | 4.4 | 0.11 | 5.5 | 0.2 | 5.5  | 2.2 | 17.8   | 1008.3 | 5.5 | 0.2 |
| Hawkins-Spot 233 | 227  | 162 | 3.5 | 24.1525 | 15.8  | 0.0048 | 16.3  | 0.0008 | 4.2 | 0.26 | 5.5 | 0.2 | 4.9  | 0.8 | NA     | NA     | 5.5 | 0.2 |
| Hawkins-Spot 174 | 200  | 185 | 2.5 | 21.0111 | 46.0  | 0.0056 | 46.3  | 0.0008 | 4.8 | 0.10 | 5.5 | 0.3 | 5.6  | 2.6 | 79.1   | 1149.1 | 5.5 | 0.3 |
| Hawkins-Spot 175 | 205  | 170 | 2.7 | 21.1939 | 25.5  | 0.0055 | 26.2  | 0.0009 | 5.9 | 0.22 | 5.5 | 0.3 | 5.6  | 1.5 | 58.5   | 617.3  | 5.5 | 0.3 |
| Hawkins-Spot 197 | 218  | 150 | 2.3 | 20.9701 | 14.6  | 0.0056 | 15.5  | 0.0009 | 5.4 | 0.35 | 5.5 | 0.3 | 5.7  | 0.9 | 83.7   | 347.2  | 5.5 | 0.3 |
| Hawkins-Spot 138 | 420  | 120 | 1.9 | 20.9469 | 14.9  | 0.0056 | 15.4  | 0.0009 | 3.8 | 0.25 | 5.5 | 0.2 | 5.7  | 0.9 | 86.4   | 355.1  | 5.5 | 0.2 |
| Hawkins-Spot 149 | 591  | 150 | 1.5 | 21.1959 | 99.5  | 0.0055 | 99.6  | 0.0009 | 4.2 | 0.04 | 5.5 | 0.2 | 5.6  | 5.6 | 58.3   | NA     | 5.5 | 0.2 |
| Hawkins-Spot 176 | 196  | 178 | 2.8 | 21.1638 | 15.6  | 0.0056 | 16.6  | 0.0009 | 5.6 | 0.34 | 5.5 | 0.3 | 5.6  | 0.9 | 61.9   | 373.6  | 5.5 | 0.3 |
| Hawkins-Spot 46  | 253  | 120 | 2.8 | 21.5269 | 34.4  | 0.0055 | 34.6  | 0.0009 | 4.2 | 0.12 | 5.5 | 0.2 | 5.5  | 1.9 | 21.2   | 846.6  | 5.5 | 0.2 |
| Hawkins-Spot 159 | 284  | 160 | 2.3 | 21.5885 | 10.3  | 0.0055 | 11.5  | 0.0009 | 5.0 | 0.44 | 5.5 | 0.3 | 5.5  | 0.6 | 14.4   | 249.1  | 5.5 | 0.3 |
| Hawkins-Spot 59  | 267  | 154 | 2.5 | 21.5872 | 9.4   | 0.0055 | 10.5  | 0.0009 | 4.8 | 0.45 | 5.5 | 0.3 | 5.5  | 0.6 | 14.5   | 225.4  | 5.5 | 0.3 |
| Hawkins-Spot 29  | 181  | 180 | 3.2 | 21.3208 | 102.6 | 0.0055 | 102.8 | 0.0009 | 5.5 | 0.05 | 5.5 | 0.3 | 5.6  | 5.7 | 44.3   | NA     | 5.5 | 0.3 |
| Hawkins-Spot 11  | 346  | 168 | 3.7 | 21.2752 | 5.9   | 0.0056 | 7.6   | 0.0009 | 4.7 | 0.62 | 5.5 | 0.3 | 5.6  | 0.4 | 49.4   | 141.3  | 5.5 | 0.3 |
| Hawkins-Spot 116 | 272  | 156 | 1.7 | 21.6324 | 51.6  | 0.0055 | 51.8  | 0.0009 | 4.5 | 0.09 | 5.5 | 0.3 | 5.5  | 2.9 | 9.5    | NA     | 5.5 | 0.3 |
| Hawkins-Spot 102 | 296  | 160 | 3.5 | 21.2126 | 13.5  | 0.0056 | 14.2  | 0.0009 | 4.4 | 0.31 | 5.5 | 0.2 | 5.6  | 0.8 | 56.4   | 324.1  | 5.5 | 0.2 |
| Hawkins-Spot 301 | 114  | 140 | 2.4 | 20.9200 | 46.0  | 0.0057 | 46.5  | 0.0009 | 7.3 | 0.16 | 5.5 | 0.4 | 5.7  | 2.7 | 89.5   | 1145.3 | 5.5 | 0.4 |

|                  |      |      |     |          |       |        |       |        |     |      |     |     |      |      |        |        |     |     |
|------------------|------|------|-----|----------|-------|--------|-------|--------|-----|------|-----|-----|------|------|--------|--------|-----|-----|
| Hawkins-Spot 117 | 248  | 163  | 2.2 | 21.6480  | 28.3  | 0.0055 | 28.7  | 0.0009 | 5.2 | 0.18 | 5.6 | 0.3 | 5.6  | 1.6  | 7.7    | 692.3  | 5.6 | 0.3 |
| Hawkins-Spot 25  | 329  | 158  | 2.9 | 21.4597  | 39.9  | 0.0056 | 40.1  | 0.0009 | 3.7 | 0.09 | 5.6 | 0.2 | 5.7  | 2.3  | 28.7   | 991.9  | 5.6 | 0.2 |
| Hawkins-Spot 51  | 236  | 135  | 3.2 | 21.2419  | 24.1  | 0.0057 | 24.5  | 0.0009 | 4.8 | 0.20 | 5.6 | 0.3 | 5.7  | 1.4  | 53.1   | 581.3  | 5.6 | 0.3 |
| Hawkins-Spot 129 | 381  | 165  | 2.9 | 21.6030  | 25.1  | 0.0056 | 25.4  | 0.0009 | 3.8 | 0.15 | 5.6 | 0.2 | 5.6  | 1.4  | 12.7   | 612.3  | 5.6 | 0.2 |
| Hawkins-Spot 50  | 167  | 165  | 3.7 | 21.5695  | 17.3  | 0.0056 | 19.0  | 0.0009 | 8.0 | 0.42 | 5.6 | 0.4 | 5.6  | 1.1  | 16.5   | 417.6  | 5.6 | 0.4 |
| Hawkins-Spot 127 | 184  | 178  | 2.8 | 21.4079  | 11.2  | 0.0056 | 12.6  | 0.0009 | 5.8 | 0.46 | 5.6 | 0.3 | 5.7  | 0.7  | 34.5   | 269.5  | 5.6 | 0.3 |
| Hawkins-Spot 267 | 274  | 211  | 2.8 | 32.9178  | 131.7 | 0.0037 | 131.8 | 0.0009 | 4.4 | 0.03 | 5.6 | 0.2 | 3.7  | 4.9  | NA     | NA     | 5.6 | 0.2 |
| Hawkins-Spot 98  | 284  | 150  | 3.1 | 21.5425  | 8.1   | 0.0056 | 9.4   | 0.0009 | 4.9 | 0.52 | 5.6 | 0.3 | 5.7  | 0.5  | 19.5   | 194.7  | 5.6 | 0.3 |
| Hawkins-Spot 173 | 264  | 152  | 2.8 | 21.0063  | 122.3 | 0.0057 | 122.4 | 0.0009 | 4.1 | 0.03 | 5.6 | 0.2 | 5.8  | 7.1  | 79.7   | NA     | 5.6 | 0.2 |
| Hawkins-Spot 182 | 226  | 176  | 2.9 | 21.1595  | 17.6  | 0.0057 | 18.3  | 0.0009 | 5.1 | 0.28 | 5.6 | 0.3 | 5.8  | 1.1  | 62.4   | 421.9  | 5.6 | 0.3 |
| Hawkins-Spot 17  | 603  | 190  | 2.3 | 21.6392  | 14.7  | 0.0056 | 15.3  | 0.0009 | 4.0 | 0.27 | 5.6 | 0.2 | 5.6  | 0.9  | 8.7    | 356.2  | 5.6 | 0.2 |
| Hawkins-Spot 181 | 253  | 190  | 2.7 | 21.0243  | 18.7  | 0.0057 | 19.4  | 0.0009 | 5.2 | 0.27 | 5.7 | 0.3 | 5.8  | 1.1  | 77.6   | 446.5  | 5.7 | 0.3 |
| Hawkins-Spot 256 | 860  | 648  | 1.8 | 39.1206  | 8.5   | 0.0031 | 9.1   | 0.0009 | 3.2 | 0.35 | 5.7 | 0.2 | 3.1  | 0.3  | NA     | NA     | 5.7 | 0.2 |
| Hawkins-Spot 7   | 268  | 190  | 2.3 | 21.5334  | 42.0  | 0.0056 | 42.3  | 0.0009 | 4.8 | 0.11 | 5.7 | 0.3 | 5.7  | 2.4  | 20.5   | 1051.0 | 5.7 | 0.3 |
| Hawkins-Spot 270 | 530  | 160  | 1.8 | 20.5243  | 31.0  | 0.0059 | 31.2  | 0.0009 | 3.4 | 0.11 | 5.7 | 0.2 | 6.0  | 1.9  | 134.5  | 744.3  | 5.7 | 0.2 |
| Hawkins-Spot 67  | 246  | 150  | 3.1 | 21.5796  | 123.9 | 0.0056 | 124.0 | 0.0009 | 5.0 | 0.04 | 5.7 | 0.3 | 5.7  | 7.0  | 15.4   | NA     | 5.7 | 0.3 |
| Hawkins-Spot 201 | 248  | 98   | 2.0 | 20.9509  | 22.2  | 0.0058 | 22.7  | 0.0009 | 4.8 | 0.21 | 5.7 | 0.3 | 5.9  | 1.3  | 86.0   | 532.5  | 5.7 | 0.3 |
| Hawkins-Spot 118 | 312  | 205  | 2.7 | 21.5884  | 27.9  | 0.0056 | 28.2  | 0.0009 | 3.9 | 0.14 | 5.7 | 0.2 | 5.7  | 1.6  | 14.4   | 682.3  | 5.7 | 0.2 |
| Hawkins-Spot 139 | 246  | 160  | 2.1 | 20.9639  | 42.1  | 0.0058 | 42.4  | 0.0009 | 5.4 | 0.13 | 5.7 | 0.3 | 5.9  | 2.5  | 84.4   | 1039.2 | 5.7 | 0.3 |
| Hawkins-Spot 231 | 265  | 152  | 3.0 | 21.4369  | 41.3  | 0.0057 | 41.5  | 0.0009 | 4.1 | 0.10 | 5.7 | 0.2 | 5.7  | 2.4  | 31.2   | 1027.8 | 5.7 | 0.2 |
| Hawkins-Spot 255 | 206  | 215  | 2.7 | 45.8432  | 21.9  | 0.0027 | 22.3  | 0.0009 | 3.9 | 0.18 | 5.7 | 0.2 | 2.7  | 0.6  | NA     | NA     | 5.7 | 0.2 |
| Hawkins-Spot 89  | 209  | 165  | 4.0 | 21.3538  | 11.1  | 0.0057 | 12.0  | 0.0009 | 4.7 | 0.39 | 5.7 | 0.3 | 5.8  | 0.7  | 40.6   | 265.1  | 5.7 | 0.3 |
| Hawkins-Spot 221 | 233  | 180  | 3.5 | 21.5379  | 7.2   | 0.0057 | 8.6   | 0.0009 | 4.8 | 0.56 | 5.7 | 0.3 | 5.7  | 0.5  | 20.0   | 172.3  | 5.7 | 0.3 |
| Hawkins-Spot 82  | 85   | 123  | 1.7 | 21.2798  | 154.8 | 0.0057 | 155.0 | 0.0009 | 7.8 | 0.05 | 5.7 | 0.4 | 5.8  | 9.0  | 48.8   | NA     | 5.7 | 0.4 |
| Hawkins-Spot 213 | 152  | 167  | 3.1 | 20.9816  | 7.9   | 0.0058 | 9.0   | 0.0009 | 4.5 | 0.49 | 5.7 | 0.3 | 5.9  | 0.5  | 82.4   | 186.6  | 5.7 | 0.3 |
| Hawkins-Spot 277 | 268  | 164  | 2.6 | 21.1874  | 112.8 | 0.0058 | 112.9 | 0.0009 | 4.2 | 0.04 | 5.7 | 0.2 | 5.9  | 6.6  | 59.3   | NA     | 5.7 | 0.2 |
| Hawkins-Spot 245 | 163  | 180  | 2.3 | 20.9213  | 61.2  | 0.0059 | 61.5  | 0.0009 | 6.3 | 0.10 | 5.7 | 0.4 | 5.9  | 3.6  | 89.3   | NA     | 5.7 | 0.4 |
| Hawkins-Spot 145 | 187  | 157  | 3.1 | 21.0312  | 117.4 | 0.0058 | 117.6 | 0.0009 | 5.6 | 0.05 | 5.7 | 0.3 | 5.9  | 6.9  | 76.8   | NA     | 5.7 | 0.3 |
| Hawkins-Spot 172 | 352  | 180  | 2.1 | 21.3437  | 103.5 | 0.0058 | 103.6 | 0.0009 | 4.4 | 0.04 | 5.8 | 0.3 | 5.8  | 6.0  | 41.7   | NA     | 5.8 | 0.3 |
| Hawkins-Spot 204 | 335  | 185  | 3.2 | 21.2257  | 28.1  | 0.0058 | 28.6  | 0.0009 | 5.7 | 0.20 | 5.8 | 0.3 | 5.9  | 1.7  | 55.0   | 681.0  | 5.8 | 0.3 |
| Hawkins-Spot 44  | 225  | 194  | 3.4 | 21.4795  | 47.9  | 0.0057 | 48.2  | 0.0009 | 5.3 | 0.11 | 5.8 | 0.3 | 5.8  | 2.8  | 26.5   | 1213.4 | 5.8 | 0.3 |
| Hawkins-Spot 202 | 197  | 128  | 2.3 | 21.5734  | 21.2  | 0.0057 | 22.1  | 0.0009 | 6.0 | 0.27 | 5.8 | 0.3 | 5.8  | 1.3  | 16.0   | 515.0  | 5.8 | 0.3 |
| Hawkins-Spot 292 | 220  | 207  | 2.3 | 64.5174  | 258.9 | 0.0019 | 259.0 | 0.0009 | 4.8 | 0.02 | 5.8 | 0.3 | 1.9  | 5.0  | NA     | NA     | 5.8 | 0.3 |
| Hawkins-Spot 55  | 162  | 150  | 1.6 | 21.4932  | 87.6  | 0.0057 | 87.8  | 0.0009 | 5.8 | 0.07 | 5.8 | 0.3 | 5.8  | 5.1  | 25.0   | NA     | 5.8 | 0.3 |
| Hawkins-Spot 155 | 302  | 192  | 2.6 | 21.1155  | 45.1  | 0.0059 | 45.4  | 0.0009 | 5.1 | 0.11 | 5.8 | 0.3 | 5.9  | 2.7  | 67.3   | 1124.7 | 5.8 | 0.3 |
| Hawkins-Spot 14  | 166  | 202  | 2.8 | 21.1781  | 40.0  | 0.0058 | 40.4  | 0.0009 | 5.6 | 0.14 | 5.8 | 0.3 | 5.9  | 2.4  | 60.3   | 988.6  | 5.8 | 0.3 |
| Hawkins-Spot 198 | 274  | 172  | 2.9 | 20.8859  | 98.9  | 0.0059 | 99.0  | 0.0009 | 5.8 | 0.06 | 5.8 | 0.3 | 6.0  | 5.9  | 93.3   | NA     | 5.8 | 0.3 |
| Hawkins-Spot 85  | 251  | 159  | 1.3 | 21.6430  | 9.7   | 0.0057 | 11.0  | 0.0009 | 5.2 | 0.47 | 5.8 | 0.3 | 5.8  | 0.6  | 8.3    | 235.0  | 5.8 | 0.3 |
| Hawkins-Spot 18  | 182  | 175  | 3.1 | 21.1356  | 58.9  | 0.0059 | 59.3  | 0.0009 | 6.8 | 0.11 | 5.8 | 0.4 | 5.9  | 3.5  | 65.1   | NA     | 5.8 | 0.4 |
| Hawkins-Spot 254 | 238  | 214  | 3.2 | 104.3009 | 13.4  | 0.0012 | 14.1  | 0.0009 | 4.5 | 0.32 | 5.8 | 0.3 | 1.2  | 0.2  | NA     | NA     | 5.8 | 0.3 |
| Hawkins-Spot 275 | 122  | 100  | 1.8 | 8.9567   | 10.2  | 0.0139 | 11.6  | 0.0009 | 5.4 | 0.47 | 5.8 | 0.3 | 14.0 | 1.6  | 1826.4 | 185.9  | 5.8 | 0.3 |
| Hawkins-Spot 215 | 352  | 259  | 3.5 | 500.3889 | 54.5  | 0.0002 | 54.6  | 0.0009 | 3.1 | 0.06 | 5.8 | 0.2 | 0.3  | 0.1  | NA     | NA     | 5.8 | 0.2 |
| Hawkins-Spot 206 | 246  | 158  | 3.5 | 21.2605  | 8.8   | 0.0059 | 9.8   | 0.0009 | 4.2 | 0.43 | 5.8 | 0.2 | 5.9  | 0.6  | 51.0   | 211.1  | 5.8 | 0.2 |
| Hawkins-Spot 281 | 317  | 304  | 3.0 | 548.2947 | 383.7 | 0.0002 | 383.7 | 0.0009 | 4.1 | 0.01 | 5.9 | 0.2 | 0.2  | 0.9  | NA     | NA     | 5.9 | 0.2 |
| Hawkins-Spot 261 | 292  | 405  | 2.5 | 32.1161  | 39.9  | 0.0039 | 40.1  | 0.0009 | 4.5 | 0.11 | 5.9 | 0.3 | 4.0  | 1.6  | NA     | NA     | 5.9 | 0.3 |
| Hawkins-Spot 141 | 242  | 148  | 1.6 | 21.3533  | 11.4  | 0.0059 | 12.1  | 0.0009 | 3.8 | 0.31 | 5.9 | 0.2 | 6.0  | 0.7  | 40.6   | 274.6  | 5.9 | 0.2 |
| Hawkins-Spot 69  | 150  | 139  | 3.5 | 20.7612  | 84.1  | 0.0061 | 84.3  | 0.0009 | 5.2 | 0.06 | 5.9 | 0.3 | 6.1  | 5.2  | 107.5  | NA     | 5.9 | 0.3 |
| Hawkins-Spot 222 | 276  | 188  | 1.3 | 21.6476  | 21.9  | 0.0058 | 22.3  | 0.0009 | 4.2 | 0.19 | 5.9 | 0.2 | 5.9  | 1.3  | 7.8    | 532.4  | 5.9 | 0.2 |
| Hawkins-Spot 300 | 363  | 566  | 2.3 | 30.2984  | 41.3  | 0.0042 | 41.6  | 0.0009 | 4.4 | 0.11 | 5.9 | 0.3 | 4.2  | 1.7  | NA     | NA     | 5.9 | 0.3 |
| Hawkins-Spot 101 | 317  | 170  | 2.2 | 20.9275  | 18.4  | 0.0060 | 19.0  | 0.0009 | 4.8 | 0.25 | 5.9 | 0.3 | 6.1  | 1.2  | 88.6   | 438.5  | 5.9 | 0.3 |
| Hawkins-Spot 95  | 256  | 198  | 2.3 | 21.2826  | 14.3  | 0.0059 | 14.9  | 0.0009 | 4.5 | 0.30 | 5.9 | 0.3 | 6.0  | 0.9  | 48.5   | 341.9  | 5.9 | 0.3 |
| Hawkins-Spot 293 | 217  | 188  | 2.1 | 33.4781  | 42.1  | 0.0038 | 42.5  | 0.0009 | 5.7 | 0.14 | 5.9 | 0.3 | 3.8  | 1.6  | NA     | NA     | 5.9 | 0.3 |
| Hawkins-Spot 279 | 268  | 364  | 3.0 | 598.2751 | 298.0 | 0.0002 | 298.1 | 0.0009 | 5.5 | 0.02 | 5.9 | 0.3 | 0.2  | 0.6  | NA     | NA     | 5.9 | 0.3 |
| Hawkins-Spot 54  | 183  | 156  | 1.9 | 21.3855  | 28.6  | 0.0059 | 27.1  | 0.0009 | 5.4 | 0.20 | 5.9 | 0.3 | 6.0  | 1.6  | 37.0   | 645.9  | 5.9 | 0.3 |
| Hawkins-Spot 13  | 92   | 200  | 2.1 | 21.2436  | 5.8   | 0.0060 | 8.5   | 0.0009 | 6.2 | 0.73 | 5.9 | 0.4 | 6.1  | 0.5  | 52.9   | 137.4  | 5.9 | 0.4 |
| Hawkins-Spot 105 | 85   | 113  | 3.7 | 21.3531  | 44.2  | 0.0060 | 44.6  | 0.0009 | 6.2 | 0.14 | 5.9 | 0.4 | 6.0  | 2.7  | 40.7   | 1106.0 | 5.9 | 0.4 |
| Hawkins-Spot 63  | 363  | 1072 | 2.6 | 21.0524  | 6.8   | 0.0060 | 8.2   | 0.0009 | 4.6 | 0.56 | 6.0 | 0.3 | 6.1  | 0.5  | 74.5   | 160.9  | 6.0 | 0.3 |
| Hawkins-Spot 220 | 150  | 190  | 2.3 | 21.4635  | 29.7  | 0.0059 | 30.1  | 0.0009 | 4.7 | 0.16 | 6.0 | 0.3 | 6.0  | 1.8  | 28.3   | 725.7  | 6.0 | 0.3 |
| Hawkins-Spot 299 | 2240 | 2749 | 0.9 | 23.6815  | 2.8   | 0.0054 | 4.2   | 0.0009 | 3.1 | 0.75 | 6.0 | 0.2 | 5.5  | 0.2  | NA     | NA     | 6.0 | 0.2 |
| Hawkins-Spot 148 | 229  | 202  | 2.4 | 21.1496  | 5.4   | 0.0061 | 7.3   | 0.0009 | 5.0 | 0.68 | 6.0 | 0.3 | 6.1  | 0.4  | 63.5   | 127.6  | 6.0 | 0.3 |
| Hawkins-Spot 15  | 140  | 139  | 2.0 | 21.2686  | 41.2  | 0.0060 | 41.7  | 0.0009 | 6.0 | 0.14 | 6.0 | 0.4 | 6.1  | 2.5  | 50.1   | 1023.7 | 6.0 | 0.4 |
| Hawkins-Spot 136 | 223  | 118  | 1.7 | 21.2746  | 23.2  | 0.0060 | 23.6  | 0.0009 | 3.9 | 0.16 | 6.0 | 0.2 | 6.1  | 1.4  | 49.5   | 561.4  | 6.0 | 0.2 |
| Hawkins-Spot 238 | 116  | 226  | 3.0 | 25.7700  | 21.4  | 0.0050 | 22.8  | 0.0009 | 7.8 | 0.34 | 6.0 | 0.5 | 5.1  | 1.1  | NA     | NA     | 6.0 | 0.5 |
| Hawkins-Spot 20  | 354  | 165  | 1.9 | 21.2337  | 13.4  | 0.0061 | 13.9  | 0.0009 | 3.8 | 0.27 | 6.0 | 0.2 | 6.1  | 0.9  | 54.0   | 321.5  | 6.0 | 0.2 |
| Hawkins-Spot 161 | 371  | 90   | 1.8 | 21.2636  | 164.0 | 0.0061 | 164.1 | 0.0009 | 7.0 | 0.04 | 6.0 | 0.4 | 6.1  | 10.1 | 50.7   | NA     | 6.0 | 0.4 |
| Hawkins-Spot 135 | 148  | 200  | 3.0 | 21.2407  | 57.6  | 0.0061 | 57.9  | 0.0009 | 5.4 | 0.09 | 6.0 | 0.3 | 6.2  | 3.6  | 53.2   | NA     | 6.0 | 0.3 |
| Hawkins-Spot 169 | 71   | 170  | 1.7 | 21.6325  | 9.1   | 0.0060 | 11.1  | 0.0009 | 6.4 | 0.58 | 6.1 | 0.4 | 6.1  | 0.7  | 9.5    | 219.7  | 6.1 | 0.4 |
| Hawkins-Spot 248 | 255  | 391  | 3.6 | 35.3805  | 15.8  | 0.0037 | 16.4  | 0.0009 | 4.3 | 0.26 | 6.1 | 0.3 | 3.7  | 0.6  | NA     | NA     | 6.1 | 0.3 |
| Hawkins-Spot 90  | 218  | 138  | 1.2 | 20.8359  | 11.3  | 0.0062 | 12.1  | 0.0009 | 4.3 | 0.36 | 6.1 | 0.3 | 6.3  | 0.8  | 99.0   | 269.1  | 6.1 | 0.3 |
| Hawkins-Spot 253 | 288  | 446  | 2.6 | 31.5442  | 9.2   | 0.0041 | 10.0  | 0.0009 | 3.7 | 0.37 | 6.1 | 0.2 | 4.2  | 0.4  | NA     | NA     | 6.1 | 0.2 |
| Hawkins-Spot 230 | 97   | 130  | 1.9 | 21.1641  | 16.3  | 0.0062 |       |        |     |      |     |     |      |      |        |        |     |     |

|                  |      |        |     |         |       |        |       |        |     |      |       |      |       |      |        |        |       |      |
|------------------|------|--------|-----|---------|-------|--------|-------|--------|-----|------|-------|------|-------|------|--------|--------|-------|------|
| Hawkins-Spot 167 | 308  | 195    | 1.8 | 21.2663 | 89.3  | 0.0062 | 89.4  | 0.0010 | 4.6 | 0.05 | 6.2   | 0.3  | 6.3   | 5.6  | 50.4   | NA     | 6.2   | 0.3  |
| Hawkins-Spot 310 | 283  | 740    | 2.4 | 39.7679 | 6.0   | 0.0033 | 7.6   | 0.0010 | 4.7 | 0.62 | 6.2   | 0.3  | 3.4   | 0.3  | NA     | NA     | 6.2   | 0.3  |
| Hawkins-Spot 264 | 270  | 1317   | 2.1 | 16.7835 | 8.3   | 0.0079 | 9.7   | 0.0010 | 5.1 | 0.53 | 6.2   | 0.3  | 8.0   | 0.8  | 588.5  | 179.3  | 6.2   | 0.3  |
| Hawkins-Spot 287 | 256  | 591    | 3.3 | 35.8688 | 19.8  | 0.0037 | 20.4  | 0.0010 | 4.9 | 0.24 | 6.2   | 0.3  | 3.7   | 0.8  | NA     | NA     | 6.2   | 0.3  |
| Hawkins-Spot 232 | 257  | 263    | 1.5 | 34.1543 | 23.1  | 0.0039 | 23.5  | 0.0010 | 4.4 | 0.19 | 6.2   | 0.3  | 3.9   | 0.9  | NA     | NA     | 6.2   | 0.3  |
| Hawkins-Spot 288 | 326  | 189    | 2.8 | 25.4994 | 18.6  | 0.0052 | 19.2  | 0.0010 | 4.7 | 0.24 | 6.2   | 0.3  | 5.3   | 1.0  | NA     | NA     | 6.2   | 0.3  |
| Hawkins-Spot 77  | 261  | 165    | 2.8 | 21.1766 | 112.1 | 0.0063 | 112.2 | 0.0010 | 4.8 | 0.04 | 6.2   | 0.3  | 6.4   | 7.1  | 60.4   | NA     | 6.2   | 0.3  |
| Hawkins-Spot 311 | 266  | 24752  | 3.4 | 16.6435 | 9.1   | 0.0080 | 10.5  | 0.0010 | 5.3 | 0.50 | 6.2   | 0.3  | 8.1   | 0.8  | 606.6  | 196.5  | 6.2   | 0.3  |
| Hawkins-Spot 219 | 740  | 168    | 1.5 | 21.2731 | 5.9   | 0.0063 | 6.6   | 0.0010 | 3.1 | 0.47 | 6.2   | 0.2  | 6.3   | 0.4  | 49.6   | 139.9  | 6.2   | 0.2  |
| Hawkins-Spot 40  | 497  | 175    | 1.5 | 21.5471 | 19.2  | 0.0062 | 19.6  | 0.0010 | 3.9 | 0.20 | 6.3   | 0.2  | 6.3   | 1.2  | 19.0   | 465.8  | 6.3   | 0.2  |
| Hawkins-Spot 308 | 213  | 728    | 2.2 | 32.0277 | 7.8   | 0.0042 | 9.2   | 0.0010 | 5.0 | 0.54 | 6.3   | 0.3  | 4.3   | 0.4  | NA     | NA     | 6.3   | 0.3  |
| Hawkins-Spot 306 | 166  | 237    | 3.0 | 28.2814 | 52.2  | 0.0048 | 52.5  | 0.0010 | 4.9 | 0.09 | 6.3   | 0.3  | 4.9   | 2.5  | NA     | NA     | 6.3   | 0.3  |
| Hawkins-Spot 100 | 99   | 142    | 1.5 | 21.2148 | 12.2  | 0.0064 | 14.1  | 0.0010 | 7.0 | 0.50 | 6.4   | 0.4  | 6.5   | 0.9  | 56.2   | 292.0  | 6.4   | 0.4  |
| Hawkins-Spot 86  | 132  | 2829   | 1.9 | 15.7218 | 10.9  | 0.0087 | 12.9  | 0.0010 | 6.9 | 0.54 | 6.4   | 0.4  | 8.8   | 1.1  | 728.6  | 231.8  | 6.4   | 0.4  |
| Hawkins-Spot 249 | 123  | 132    | 2.0 | 31.7193 | 40.2  | 0.0043 | 40.6  | 0.0010 | 5.9 | 0.14 | 6.4   | 0.4  | 4.3   | 1.8  | NA     | NA     | 6.4   | 0.4  |
| Hawkins-Spot 115 | 98   | 185    | 2.0 | 21.3701 | 7.7   | 0.0064 | 10.7  | 0.0010 | 7.4 | 0.69 | 6.4   | 0.5  | 6.5   | 0.7  | 38.7   | 185.2  | 6.4   | 0.5  |
| Hawkins-Spot 26  | 52   | 143    | 2.2 | 20.8775 | 11.4  | 0.0066 | 13.7  | 0.0010 | 7.6 | 0.56 | 6.4   | 0.5  | 6.6   | 0.9  | 94.3   | 271.0  | 6.4   | 0.5  |
| Hawkins-Spot 227 | 109  | 185    | 2.0 | 21.2599 | 7.9   | 0.0064 | 10.2  | 0.0010 | 6.4 | 0.63 | 6.4   | 0.4  | 6.5   | 0.7  | 51.1   | 189.6  | 6.4   | 0.4  |
| Hawkins-Spot 241 | 106  | 157    | 2.1 | 13.3515 | 42.2  | 0.0103 | 42.7  | 0.0010 | 6.0 | 0.14 | 6.4   | 0.4  | 10.4  | 4.4  | NA     | NA     | 6.4   | 0.4  |
| Hawkins-Spot 210 | 87   | 123    | 2.3 | 21.5469 | 12.9  | 0.0064 | 14.1  | 0.0010 | 5.8 | 0.41 | 6.5   | 0.4  | 6.5   | 0.9  | 19.0   | 310.8  | 6.5   | 0.4  |
| Hawkins-Spot 265 | 190  | 885    | 2.3 | 22.0117 | 10.0  | 0.0063 | 11.0  | 0.0010 | 4.5 | 0.41 | 6.5   | 0.3  | 6.3   | 0.7  | NA     | NA     | 6.5   | 0.3  |
| Hawkins-Spot 47  | 526  | 164    | 2.7 | 21.5845 | 29.3  | 0.0064 | 29.5  | 0.0010 | 3.9 | 0.13 | 6.5   | 0.2  | 6.5   | 1.9  | 14.8   | 717.4  | 6.5   | 0.2  |
| Hawkins-Spot 283 | 374  | 1513   | 3.0 | 22.3229 | 7.1   | 0.0062 | 8.1   | 0.0010 | 3.7 | 0.46 | 6.5   | 0.2  | 6.3   | 0.5  | NA     | NA     | 6.5   | 0.2  |
| Hawkins-Spot 61  | 251  | 190    | 2.2 | 21.2057 | 85.1  | 0.0065 | 85.3  | 0.0010 | 4.2 | 0.05 | 6.5   | 0.3  | 6.6   | 0.6  | 57.2   | NA     | 6.5   | 0.3  |
| Hawkins-Spot 144 | 121  | 155    | 2.0 | 21.1536 | 89.7  | 0.0065 | 89.9  | 0.0010 | 5.9 | 0.07 | 6.5   | 0.4  | 6.6   | 5.9  | 63.0   | NA     | 6.5   | 0.4  |
| Hawkins-Spot 290 | 324  | 4170   | 1.7 | 25.0920 | 5.7   | 0.0055 | 6.5   | 0.0010 | 3.2 | 0.49 | 6.5   | 0.2  | 5.6   | 0.4  | NA     | NA     | 6.5   | 0.2  |
| Hawkins-Spot 36  | 207  | 190    | 1.8 | 21.5932 | 47.3  | 0.0065 | 47.5  | 0.0010 | 4.2 | 0.09 | 6.5   | 0.3  | 6.5   | 3.1  | 13.8   | 1199.0 | 6.5   | 0.3  |
| Hawkins-Spot 237 | 253  | 1235   | 2.9 | 20.5248 | 9.6   | 0.0068 | 10.5  | 0.0010 | 4.3 | 0.41 | 6.5   | 0.3  | 6.9   | 0.7  | 134.5  | 225.8  | 6.5   | 0.3  |
| Hawkins-Spot 75  | 77   | 186    | 2.0 | 20.8237 | 7.2   | 0.0067 | 11.3  | 0.0010 | 8.6 | 0.77 | 6.5   | 0.6  | 6.8   | 0.8  | 100.4  | 171.1  | 6.5   | 0.6  |
| Hawkins-Spot 28  | 111  | 162    | 1.8 | 21.4794 | 70.2  | 0.0065 | 70.4  | 0.0010 | 5.1 | 0.07 | 6.6   | 0.3  | 6.6   | 4.7  | 26.5   | NA     | 6.6   | 0.3  |
| Hawkins-Spot 234 | 461  | 333    | 3.1 | 12.7356 | 21.2  | 0.0111 | 21.8  | 0.0010 | 5.1 | 0.23 | 6.6   | 0.3  | 11.2  | 2.4  | 1160.0 | 425.6  | 6.6   | 0.3  |
| Hawkins-Spot 218 | 83   | 190    | 1.6 | 21.2807 | 6.5   | 0.0067 | 8.2   | 0.0010 | 4.9 | 0.60 | 6.6   | 0.3  | 6.7   | 0.5  | 48.7   | 156.4  | 6.6   | 0.3  |
| Hawkins-Spot 284 | 115  | 267    | 1.6 | 55.5845 | 8.4   | 0.0026 | 10.1  | 0.0010 | 5.5 | 0.55 | 6.6   | 0.4  | 2.6   | 0.3  | NA     | NA     | 6.6   | 0.4  |
| Hawkins-Spot 163 | 295  | 200    | 1.2 | 21.1606 | 27.6  | 0.0067 | 27.9  | 0.0010 | 4.2 | 0.15 | 6.7   | 0.3  | 6.8   | 1.9  | 62.3   | 668.1  | 6.7   | 0.3  |
| Hawkins-Spot 124 | 54   | 148    | 2.3 | 21.3240 | 11.8  | 0.0067 | 14.0  | 0.0010 | 7.5 | 0.54 | 6.7   | 0.5  | 6.8   | 1.0  | 43.9   | 283.7  | 6.7   | 0.5  |
| Hawkins-Spot 276 | 81   | 3448   | 2.7 | 23.4665 | 8.3   | 0.0061 | 11.6  | 0.0010 | 8.1 | 0.70 | 6.7   | 0.5  | 6.2   | 0.7  | NA     | NA     | 6.7   | 0.5  |
| Hawkins-Spot 34  | 205  | 190    | 1.9 | 21.3708 | 7.4   | 0.0067 | 8.4   | 0.0010 | 4.1 | 0.49 | 6.7   | 0.3  | 6.8   | 0.6  | 38.6   | 176.6  | 6.7   | 0.3  |
| Hawkins-Spot 223 | 73   | 180    | 1.3 | 21.4916 | 7.9   | 0.0068 | 11.5  | 0.0011 | 8.3 | 0.73 | 6.8   | 0.6  | 6.8   | 0.8  | 25.2   | 189.7  | 6.8   | 0.6  |
| Hawkins-Spot 37  | 77   | 178    | 1.7 | 21.4672 | 20.3  | 0.0068 | 21.8  | 0.0011 | 8.0 | 0.37 | 6.8   | 0.5  | 6.9   | 1.5  | 27.9   | 491.7  | 6.8   | 0.5  |
| Hawkins-Spot 280 | 108  | 527    | 1.8 | 15.8019 | 14.8  | 0.0093 | 16.0  | 0.0011 | 6.0 | 0.38 | 6.9   | 0.4  | 9.4   | 1.5  | 717.8  | 316.3  | 6.9   | 0.4  |
| Hawkins-Spot 296 | 63   | 115    | 2.4 | 8.1258  | 11.0  | 0.0181 | 12.5  | 0.0011 | 5.9 | 0.47 | 6.9   | 0.4  | 18.2  | 2.3  | NA     | NA     | 6.9   | 0.4  |
| Hawkins-Spot 83  | 90   | 71     | 2.8 | 21.5458 | 56.1  | 0.0069 | 56.3  | 0.0011 | 5.0 | 0.09 | 6.9   | 0.3  | 6.9   | 3.9  | 19.1   | NA     | 6.9   | 0.3  |
| Hawkins-Spot 303 | 76   | 1803   | 1.6 | 18.8362 | 10.3  | 0.0079 | 12.3  | 0.0011 | 6.7 | 0.55 | 6.9   | 0.5  | 8.0   | 1.0  | 332.6  | 234.4  | 6.9   | 0.5  |
| Hawkins-Spot 209 | 118  | 124    | 1.7 | 21.1378 | 11.2  | 0.0071 | 13.0  | 0.0011 | 6.5 | 0.50 | 7.0   | 0.5  | 7.1   | 0.9  | 64.8   | 268.5  | 7.0   | 0.5  |
| Hawkins-Spot 22  | 146  | 160    | 2.1 | 20.4864 | 24.5  | 0.0080 | 25.2  | 0.0012 | 6.0 | 0.24 | 7.6   | 0.5  | 8.0   | 2.0  | 138.8  | 583.0  | 7.6   | 0.5  |
| Hawkins-Spot 266 | 35   | 155    | 2.9 | 2.2713  | 8.8   | 0.0980 | 12.7  | 0.0016 | 9.2 | 0.72 | 10.4  | 1.0  | 94.9  | 11.5 | 4052.7 | 131.7  | 10.4  | 1.0  |
| Hawkins-Spot 183 | 170  | 1984   | 5.6 | 23.0565 | 4.3   | 0.1135 | 5.0   | 0.0190 | 2.5 | 0.51 | 121.2 | 3.0  | 109.1 | 5.2  | NA     | NA     | 121.2 | 3.0  |
| Hawkins-Spot 21  | 330  | 165    | 3.1 | 19.7243 | 16.3  | 0.1368 | 16.4  | 0.0196 | 2.3 | 0.14 | 125.0 | 2.9  | 130.2 | 20.1 | 227.2  | 378.3  | 125.0 | 2.9  |
| Hawkins-Spot 122 | 44   | 1067   | 4.3 | 26.0714 | 18.6  | 0.1182 | 18.9  | 0.0224 | 3.2 | 0.17 | 142.6 | 4.5  | 113.5 | 20.2 | NA     | NA     | 142.6 | 4.5  |
| Hawkins-Spot 226 | 170  | 20601  | 5.0 | 20.9124 | 2.0   | 0.1512 | 3.6   | 0.0229 | 3.0 | 0.83 | 146.2 | 4.3  | 142.9 | 4.8  | 90.3   | 46.9   | 146.2 | 4.3  |
| Hawkins-Spot 269 | 584  | 3410   | 3.8 | 21.5878 | 1.6   | 0.1471 | 3.5   | 0.0230 | 3.1 | 0.89 | 146.9 | 4.6  | 139.4 | 4.6  | 14.4   | 38.2   | 146.9 | 4.6  |
| Hawkins-Spot 180 | 284  | 8561   | 2.6 | 21.4003 | 1.6   | 0.1567 | 2.6   | 0.0243 | 2.1 | 0.79 | 155.0 | 3.2  | 147.8 | 3.6  | 35.3   | 39.0   | 155.0 | 3.2  |
| Hawkins-Spot 106 | 158  | 40089  | 2.3 | 20.5324 | 2.2   | 0.1695 | 3.8   | 0.0253 | 3.2 | 0.83 | 160.8 | 5.1  | 159.0 | 5.7  | 133.6  | 50.7   | 160.8 | 5.1  |
| Hawkins-Spot 1   | 414  | 145    | 2.8 | 19.9600 | 19.9  | 0.2522 | 20.1  | 0.0365 | 3.3 | 0.16 | 231.3 | 7.5  | 228.4 | 41.2 | 199.6  | 465.6  | 231.3 | 7.5  |
| Hawkins-Spot 48  | 458  | 32617  | 2.6 | 18.5985 | 1.1   | 0.3438 | 3.0   | 0.0464 | 2.8 | 0.93 | 292.3 | 7.9  | 300.0 | 7.7  | 361.3  | 24.5   | 292.3 | 7.9  |
| Hawkins-Spot 193 | 261  | 5814   | 3.5 | 19.6763 | 1.3   | 0.3275 | 3.2   | 0.0467 | 2.9 | 0.91 | 294.5 | 8.2  | 287.6 | 7.9  | 232.8  | 31.0   | 294.5 | 8.2  |
| Hawkins-Spot 72  | 387  | 6917   | 3.6 | 19.2144 | 2.0   | 0.3373 | 3.8   | 0.0470 | 3.2 | 0.85 | 296.2 | 9.3  | 295.1 | 9.7  | 287.4  | 45.0   | 296.2 | 9.3  |
| Hawkins-Spot 315 | 300  | 11047  | 3.2 | 18.7344 | 1.7   | 0.3464 | 3.4   | 0.0471 | 3.0 | 0.87 | 296.6 | 8.6  | 302.0 | 8.9  | 344.9  | 37.8   | 296.6 | 8.6  |
| Hawkins-Spot 94  | 219  | 5502   | 3.7 | 19.5970 | 2.8   | 0.3329 | 3.9   | 0.0473 | 2.8 | 0.70 | 298.1 | 8.0  | 291.8 | 10.0 | 242.1  | 64.5   | 298.1 | 8.0  |
| Hawkins-Spot 236 | 1126 | 35541  | 4.6 | 18.8316 | 1.0   | 0.3470 | 2.7   | 0.0474 | 2.5 | 0.93 | 298.6 | 7.3  | 302.5 | 7.0  | 333.2  | 21.7   | 298.6 | 7.3  |
| Hawkins-Spot 73  | 710  | 28560  | 2.4 | 18.9050 | 1.3   | 0.3468 | 3.2   | 0.0476 | 2.9 | 0.92 | 299.6 | 8.5  | 302.3 | 8.3  | 324.3  | 28.6   | 299.6 | 8.5  |
| Hawkins-Spot 91  | 107  | 4486   | 3.5 | 19.6377 | 2.0   | 0.3341 | 4.4   | 0.0476 | 3.9 | 0.89 | 299.8 | 11.4 | 292.7 | 11.2 | 237.3  | 47.0   | 299.8 | 11.4 |
| Hawkins-Spot 235 | 909  | 49808  | 2.9 | 18.9569 | 0.9   | 0.3465 | 3.2   | 0.0477 | 3.1 | 0.96 | 300.1 | 9.0  | 302.1 | 8.3  | 318.1  | 20.4   | 300.1 | 9.0  |
| Hawkins-Spot 212 | 691  | 106658 | 2.4 | 18.7975 | 1.3   | 0.3499 | 3.6   | 0.0477 | 3.3 | 0.93 | 300.5 | 9.8  | 304.6 | 9.5  | 337.3  | 29.5   | 300.5 | 9.8  |
| Hawkins-Spot 99  | 240  | 4422   | 3.3 | 19.9721 | 1.5   | 0.3295 | 3.8   | 0.0478 | 3.5 | 0.92 | 300.7 | 10.2 | 289.2 | 9.6  | 198.2  | 35.6   | 300.7 | 10.2 |
| Hawkins-Spot 207 | 212  | 5820   | 3.3 | 19.2241 | 2.9   | 0.3428 | 4.0   | 0.0478 | 2.8 | 0.71 | 301.1 | 8.4  | 299.3 | 10.5 | 286.2  | 65.5   | 301.1 | 8.4  |
| Hawkins-Spot 68  | 903  | 15219  | 2.3 | 19.0256 | 1.5   | 0.3470 | 3.1   | 0.0479 | 2.8 | 0.88 | 301.7 | 8.2  | 302.5 | 8.2  | 309.9  | 33.7   | 301.7 | 8.2  |
| Hawkins-Spot 168 | 350  | 9608   | 2.3 | 19.4021 | 1.9   | 0.3404 | 3.3   | 0.0479 | 2.8 | 0.83 | 301.8 | 8.1  | 297.5 | 8.6  | 265.1  | 43.1   | 301.8 | 8.1  |
| Hawkins-Spot 71  | 114  | 8308   | 3.2 | 19.8463 | 1.8   | 0.3342 | 3.7   | 0.0481 | 3.3 | 0.88 | 303.0 | 9.8  | 292.8 | 9.5  | 212.9  | 40.8   | 303.0 | 9.8  |
| Hawkins-Spot 199 | 317  | 16408  | 3.5 | 18.5168 | 1.7   | 0.3583 | 3.1   | 0.0481 | 2.6 | 0.84 |       |      |       |      |        |        |       |      |

|                                                                                        |      |       |     |            |      |         |      |        |      |      |       |      |       |      |        |        |       |      |
|----------------------------------------------------------------------------------------|------|-------|-----|------------|------|---------|------|--------|------|------|-------|------|-------|------|--------|--------|-------|------|
| Hawkins-Spot 242                                                                       | 754  | 30030 | 2.7 | 19.3887    | 1.3  | 0.3471  | 3.3  | 0.0488 | 3.1  | 0.92 | 307.4 | 9.2  | 302.6 | 8.7  | 266.7  | 29.7   | 307.4 | 9.2  |
| Hawkins-Spot 19                                                                        | 1079 | 28751 | 2.1 | 19.1575    | 1.4  | 0.3514  | 3.2  | 0.0488 | 2.9  | 0.89 | 307.4 | 8.6  | 305.8 | 8.4  | 294.1  | 32.6   | 307.4 | 8.6  |
| Hawkins-Spot 109                                                                       | 464  | 959   | 1.5 | 9.0334     | 8.5  | 0.7479  | 8.9  | 0.0490 | 2.7  | 0.30 | 308.5 | 8.0  | 567.0 | 38.6 | 1810.9 | 154.1  | 308.5 | 8.0  |
| Hawkins-Spot 239                                                                       | 246  | 8157  | 4.4 | 19.4124    | 1.7  | 0.3498  | 3.6  | 0.0493 | 3.2  | 0.89 | 310.0 | 9.7  | 304.6 | 9.5  | 263.8  | 38.4   | 310.0 | 9.7  |
| Hawkins-Spot 240                                                                       | 242  | 10604 | 3.4 | 18.5836    | 1.5  | 0.3668  | 3.3  | 0.0495 | 2.9  | 0.88 | 311.2 | 8.8  | 317.3 | 8.9  | 363.1  | 34.4   | 311.2 | 8.8  |
| Hawkins-Spot 80                                                                        | 82   | 2778  | 4.1 | 20.7533    | 3.5  | 0.3301  | 4.5  | 0.0497 | 2.8  | 0.62 | 312.7 | 8.5  | 289.6 | 11.3 | 108.4  | 83.0   | 312.7 | 8.5  |
| Hawkins-Spot 177                                                                       | 287  | 29968 | 3.4 | 18.6215    | 1.6  | 0.3685  | 3.1  | 0.0498 | 2.7  | 0.86 | 313.2 | 8.2  | 318.5 | 8.5  | 358.5  | 35.9   | 313.2 | 8.2  |
| Hawkins-Spot 273                                                                       | 227  | 8422  | 2.9 | 19.6962    | 1.4  | 0.3508  | 2.8  | 0.0501 | 2.4  | 0.86 | 315.4 | 7.5  | 305.3 | 7.4  | 230.4  | 32.8   | 315.4 | 7.5  |
| Hawkins-Spot 164                                                                       | 199  | 50131 | 3.9 | 18.7091    | 2.1  | 0.3861  | 3.9  | 0.0524 | 3.2  | 0.83 | 329.3 | 10.4 | 331.5 | 10.9 | 347.9  | 48.3   | 329.3 | 10.4 |
| Kennicott River (Root Glacier) (two analysis sessions, ROOT and ROOT1, on same sample) |      |       |     |            |      |         |      |        |      |      |       |      |       |      |        |        |       |      |
| Root -Spot 14                                                                          | 316  | 570   | 2.6 | 18.0616    | 25.0 | 0.0022  | 25.4 | 0.0003 | 4.4  | 0.17 | 1.8   | 0.1  | 2.2   | 0.6  | 427.0  | 566.6  | 1.8   | 0.1  |
| Root1-Spot 24                                                                          | 150  | 232   | 1.5 | -60.5526   | 28.5 | -0.0007 | 29.3 | 0.0003 | 7.1  | 0.24 | 1.9   | 0.1  | 0.7   | 0.2  | 0.0    | 0.0    | 1.9   | 0.1  |
| Root1-Spot 26                                                                          | 237  | 256   | 1.1 | -75.8568   | 12.3 | -0.0006 | 14.0 | 0.0003 | 6.7  | 0.48 | 2.0   | 0.1  | 0.6   | 0.1  | 0.0    | 0.0    | 2.0   | 0.1  |
| Root1-Spot 36                                                                          | 64   | 76    | 2.1 | -4.0269    | 3.3  | -0.0105 | 12.3 | 0.0003 | 11.8 | 0.96 | 2.0   | 0.2  | 10.8  | 1.3  | NA     | NA     | 2.0   | 0.2  |
| Root -Spot 36                                                                          | 292  | 598   | 1.9 | 49.0612    | 22.8 | 0.0009  | 23.2 | 0.0003 | 4.5  | 0.19 | 2.1   | 0.1  | 0.9   | 0.2  | 2553.2 | 785.3  | 2.1   | 0.1  |
| Root -Spot 76                                                                          | 173  | 651   | 1.9 | 43.3818    | 16.2 | 0.0010  | 17.4 | 0.0003 | 6.2  | 0.36 | 2.1   | 0.1  | 1.0   | 0.2  | 2056.2 | 620.6  | 2.1   | 0.1  |
| Root1-Spot 54                                                                          | 82   | 93    | 2.0 | -7.4048    | NA   | -0.0062 | NA   | 0.0003 | 11.2 | NA   | 2.1   | 0.2  | 6.3   | NA   | 0.0    | NA     | 2.1   | 0.2  |
| Root -Spot 88                                                                          | 160  | 981   | 1.7 | 23.1026    | 16.6 | 0.0020  | 17.7 | 0.0003 | 6.2  | 0.35 | 2.2   | 0.1  | 2.0   | 0.4  | 151.2  | 414.9  | 2.2   | 0.1  |
| Root -Spot 39                                                                          | 112  | 673   | 2.8 | 13.7475    | 23.6 | 0.0034  | 24.8 | 0.0003 | 7.8  | 0.31 | 2.2   | 0.2  | 3.4   | 0.9  | 1006.7 | 485.2  | 2.2   | 0.2  |
| Root1-Spot 50                                                                          | 121  | 230   | 1.8 | -178.3374  | 47.0 | -0.0003 | 47.8 | 0.0003 | 8.8  | 0.18 | 2.2   | 0.2  | 0.3   | 0.1  | 0.0    | 0.0    | 2.2   | 0.2  |
| Root1-Spot 38                                                                          | 116  | 178   | 1.6 | 8.0514     | 50.0 | 0.0059  | 50.8 | 0.0003 | 9.1  | 0.18 | 2.2   | 0.2  | 6.0   | 3.0  | 2017.4 | 955.0  | 2.2   | 0.2  |
| Root1-Spot 34                                                                          | 117  | 524   | 2.4 | 82.6254    | 9.6  | 0.0006  | 12.8 | 0.0003 | 8.4  | 0.66 | 2.2   | 0.2  | 0.6   | 0.1  | 0.0    | 0.0    | 2.2   | 0.2  |
| Root1-Spot 52                                                                          | 208  | 780   | 2.0 | 28.7874    | 13.2 | 0.0017  | 16.0 | 0.0003 | 9.1  | 0.57 | 2.2   | 0.2  | 1.7   | 0.3  | 729.6  | 370.2  | 2.2   | 0.2  |
| Root1-Spot 23                                                                          | 158  | 959   | 1.8 | 32.8153    | 11.1 | 0.0015  | 14.2 | 0.0003 | 8.9  | 0.63 | 2.2   | 0.2  | 1.5   | 0.2  | 1111.0 | 336.7  | 2.2   | 0.2  |
| Root1-Spot 41                                                                          | 47   | 168   | 1.4 | 24.9824    | 5.9  | 0.0021  | 16.3 | 0.0004 | 15.2 | 0.93 | 2.5   | 0.4  | 2.1   | 0.3  | 349.1  | 153.1  | 2.5   | 0.4  |
| Root1-Spot 6                                                                           | 167  | 216   | 2.1 | 7.1945     | 50.1 | 0.0074  | 50.5 | 0.0004 | 5.7  | 0.11 | 2.5   | 0.1  | 7.5   | 3.8  | 2214.7 | 938.3  | 2.5   | 0.1  |
| Root -Spot 103                                                                         | 131  | 699   | 1.7 | 80.6932    | 30.1 | 0.0007  | 30.9 | 0.0004 | 7.0  | 0.23 | 2.5   | 0.2  | 0.7   | 0.2  | 0.0    | 1602.3 | 2.5   | 0.2  |
| Root1-Spot 17                                                                          | 110  | 347   | 1.6 | -1015.8622 | 8.5  | -0.0001 | 12.8 | 0.0004 | 9.5  | 0.74 | 2.5   | 0.2  | 0.1   | 0.0  | 0.0    | 0.0    | 2.5   | 0.2  |
| Root -Spot 53                                                                          | 153  | 1132  | 1.4 | 35.4613    | 13.0 | 0.0016  | 14.2 | 0.0004 | 5.7  | 0.40 | 2.6   | 0.1  | 1.6   | 0.2  | 1353.3 | 418.1  | 2.6   | 0.1  |
| Root -Spot 78                                                                          | 128  | 728   | 3.0 | 25.6012    | 17.9 | 0.0022  | 19.6 | 0.0004 | 7.8  | 0.40 | 2.7   | 0.2  | 2.3   | 0.4  | 412.7  | 472.0  | 2.7   | 0.2  |
| Root -Spot 33                                                                          | 163  | 441   | 2.5 | 68.9391    | 59.8 | 0.0008  | 60.1 | 0.0004 | 6.6  | 0.11 | 2.7   | 0.2  | 0.9   | 0.5  | 0.0    | 312.6  | 2.7   | 0.2  |
| Root1-Spot 32                                                                          | 80   | 174   | 1.4 | -52.4579   | 62.9 | -0.0012 | 63.6 | 0.0005 | 9.9  | 0.16 | 2.9   | 0.3  | 1.2   | 0.8  | 0.0    | 0.0    | 2.9   | 0.3  |
| Root1-Spot 39                                                                          | 84   | 181   | 2.3 | 6.9527     | 32.2 | 0.0090  | 34.1 | 0.0005 | 11.2 | 0.33 | 2.9   | 0.3  | 9.1   | 3.1  | 2273.8 | 570.9  | 2.9   | 0.3  |
| Root1-Spot 48                                                                          | 222  | 498   | 1.5 | 104.4239   | 42.0 | 0.0006  | 42.4 | 0.0005 | 5.6  | 0.13 | 3.0   | 0.2  | 0.6   | 0.3  | 0.0    | 0.0    | 3.0   | 0.2  |
| Root1-Spot 40                                                                          | 236  | 479   | 1.8 | 23.0394    | 21.6 | 0.0028  | 22.0 | 0.0005 | 4.2  | 0.19 | 3.0   | 0.1  | 2.9   | 0.6  | 144.4  | 540.4  | 3.0   | 0.1  |
| Root -Spot 40                                                                          | 379  | 1312  | 1.5 | 18.5008    | 12.2 | 0.0036  | 12.6 | 0.0005 | 3.4  | 0.27 | 3.1   | 0.1  | 3.7   | 0.5  | 373.2  | 275.0  | 3.1   | 0.1  |
| Root -Spot 59                                                                          | 426  | 4086  | 1.9 | 22.7533    | 10.9 | 0.0030  | 11.3 | 0.0005 | 3.0  | 0.27 | 3.2   | 0.1  | 3.0   | 0.3  | 113.5  | 268.3  | 3.2   | 0.1  |
| Root1-Spot 10                                                                          | 90   | 272   | 2.6 | -206.7715  | 8.6  | -0.0003 | 10.4 | 0.0005 | 5.8  | 0.56 | 3.2   | 0.2  | 0.3   | 0.0  | 0.0    | 0.0    | 3.2   | 0.2  |
| Root -Spot 49                                                                          | 88   | 233   | 1.3 | 6.9356     | 46.7 | 0.0102  | 47.1 | 0.0005 | 6.2  | 0.13 | 3.3   | 0.2  | 10.3  | 4.8  | 2278.0 | 857.7  | 3.3   | 0.2  |
| Root -Spot 9                                                                           | 63   | 606   | 2.1 | 20.4078    | 22.3 | 0.0035  | 24.2 | 0.0005 | 9.5  | 0.39 | 3.3   | 0.3  | 3.5   | 0.9  | 147.9  | 528.5  | 3.3   | 0.3  |
| Root -Spot 56                                                                          | 125  | 264   | 1.3 | 403.5673   | 14.5 | 0.0002  | 15.6 | 0.0007 | 5.8  | 0.37 | 4.3   | 0.2  | 0.2   | 0.0  | 0.0    | 0.0    | 4.3   | 0.2  |
| Root1-Spot 30                                                                          | 48   | 113   | 1.7 | -13.9790   | NA   | -0.0069 | NA   | 0.0007 | 9.0  | NA   | 4.5   | 0.4  | 7.1   | NA   | 0.0    | NA     | 4.5   | 0.4  |
| Root1-Spot 47                                                                          | 131  | 311   | 1.4 | 69.0485    | 14.8 | 0.0014  | 15.7 | 0.0007 | 5.2  | 0.33 | 4.6   | 0.2  | 1.4   | 0.2  | 0.0    | 0.0    | 4.6   | 0.2  |
| Root1-Spot 45                                                                          | 107  | 355   | 2.1 | 23.3812    | 18.4 | 0.0043  | 19.2 | 0.0007 | 5.4  | 0.28 | 4.8   | 0.3  | 4.4   | 0.8  | 181.0  | 463.8  | 4.8   | 0.3  |
| Root1-Spot 49                                                                          | 119  | 1087  | 1.9 | 19.4959    | 20.8 | 0.0053  | 21.6 | 0.0007 | 5.9  | 0.27 | 4.8   | 0.3  | 5.3   | 1.1  | 254.0  | 483.7  | 4.8   | 0.3  |
| Root1-Spot 46                                                                          | 145  | 1178  | 1.2 | 33.1422    | 12.9 | 0.0031  | 14.2 | 0.0007 | 5.8  | 0.41 | 4.8   | 0.3  | 3.1   | 0.4  | 1141.2 | 397.1  | 4.8   | 0.3  |
| Root -Spot 12                                                                          | 69   | 582   | 1.9 | 14.1142    | 22.0 | 0.0073  | 23.0 | 0.0007 | 6.8  | 0.29 | 4.8   | 0.3  | 7.4   | 1.7  | 953.1  | 455.7  | 4.8   | 0.3  |
| Root -Spot 79                                                                          | 96   | 1089  | 1.5 | 26.9793    | 18.9 | 0.0038  | 19.5 | 0.0007 | 4.9  | 0.25 | 4.8   | 0.2  | 3.9   | 0.8  | 551.8  | 512.3  | 4.8   | 0.2  |
| Root -Spot 101                                                                         | 88   | 746   | 1.9 | 24.1103    | 15.6 | 0.0043  | 16.5 | 0.0008 | 5.6  | 0.34 | 4.8   | 0.3  | 4.3   | 0.7  | 258.2  | 396.1  | 4.8   | 0.3  |
| Root -Spot 75                                                                          | 55   | 1752  | 1.2 | 12.0759    | 22.6 | 0.0086  | 23.2 | 0.0008 | 5.4  | 0.23 | 4.9   | 0.3  | 8.7   | 2.0  | 1264.7 | 447.1  | 4.9   | 0.3  |
| Root -Spot 51                                                                          | 54   | 222   | 1.8 | 73.0737    | 24.1 | 0.0014  | 25.2 | 0.0008 | 7.2  | 0.28 | 4.9   | 0.3  | 1.4   | 0.4  | 0.0    | 1558.2 | 4.9   | 0.3  |
| Root -Spot 104                                                                         | 250  | 2280  | 2.4 | 19.4518    | 10.4 | 0.0054  | 11.3 | 0.0008 | 4.3  | 0.38 | 4.9   | 0.2  | 5.4   | 0.6  | 259.2  | 240.3  | 4.9   | 0.2  |
| Root -Spot 5                                                                           | 266  | 1099  | 0.8 | 26.3807    | 10.5 | 0.0040  | 11.1 | 0.0008 | 3.6  | 0.33 | 5.0   | 0.2  | 4.1   | 0.5  | 491.7  | 279.8  | 5.0   | 0.2  |
| Root1-Spot 44                                                                          | 62   | 180   | 1.5 | -85.6054   | 16.0 | -0.0012 | 17.9 | 0.0008 | 8.0  | 0.45 | 5.0   | 0.4  | 1.3   | 0.2  | 0.0    | 0.0    | 5.0   | 0.4  |
| Root -Spot 105                                                                         | 113  | 352   | 1.2 | 97.2650    | 13.7 | 0.0011  | 14.7 | 0.0008 | 5.5  | 0.37 | 5.0   | 0.3  | 1.1   | 0.2  | 0.0    | 0.0    | 5.0   | 0.3  |
| Root -Spot 82                                                                          | 99   | 1541  | 1.8 | 13.4361    | 17.1 | 0.0080  | 18.0 | 0.0008 | 5.9  | 0.32 | 5.0   | 0.3  | 8.1   | 1.4  | 1053.1 | 346.1  | 5.0   | 0.3  |
| Root -Spot 3                                                                           | 65   | 595   | 1.7 | 71.8015    | 12.7 | 0.0015  | 15.3 | 0.0008 | 8.5  | 0.55 | 5.0   | 0.4  | 1.5   | 0.2  | 0.0    | 0.0    | 5.0   | 0.4  |
| Root -Spot 35                                                                          | 336  | 4234  | 1.9 | 21.7282    | 9.0  | 0.0050  | 9.5  | 0.0008 | 3.1  | 0.33 | 5.1   | 0.2  | 5.0   | 0.5  | 1.2    | 217.0  | 5.1   | 0.2  |
| Root1-Spot 16                                                                          | 853  | 7746  | 0.9 | 20.3573    | 6.8  | 0.0053  | 7.2  | 0.0008 | 2.5  | 0.34 | 5.1   | 0.1  | 5.4   | 0.4  | 153.7  | 159.0  | 5.1   | 0.1  |
| Root1-Spot 1                                                                           | 553  | 4264  | 1.4 | 17.8473    | 8.3  | 0.0061  | 9.0  | 0.0008 | 3.3  | 0.37 | 5.1   | 0.2  | 6.2   | 0.5  | 453.6  | 185.4  | 5.1   | 0.2  |
| Root -Spot 34                                                                          | 101  | 458   | 1.8 | 69.7238    | 19.2 | 0.0016  | 19.9 | 0.0008 | 5.3  | 0.27 | 5.1   | 0.3  | 1.6   | 0.3  | 0.0    | 1598.9 | 5.1   | 0.3  |
| Root -Spot 102                                                                         | 80   | 281   | 1.6 | 122.1725   | 14.7 | 0.0009  | 15.3 | 0.0008 | 4.3  | 0.28 | 5.1   | 0.2  | 0.9   | 0.1  | 0.0    | 0.0    | 5.1   | 0.2  |
| Root -Spot 60                                                                          | 121  | 3559  | 2.1 | 16.8347    | 15.7 | 0.0065  | 16.4 | 0.0008 | 4.6  | 0.28 | 5.1   | 0.2  | 6.6   | 1.1  | 581.8  | 343.0  | 5.1   | 0.2  |
| Root -Spot 43                                                                          | 1356 | 35700 | 0.9 | 21.2591    | 5.0  | 0.0051  | 5.4  | 0.0008 | 1.9  | 0.35 | 5.1   | 0.1  | 5.2   | 0.3  | 51.2   | 120.1  | 5.1   | 0.1  |
| Root -Spot 69                                                                          | 201  | 4965  | 3.0 | 17.1147    | 12.3 | 0.0064  | 12.7 | 0.0008 | 3.3  | 0.26 | 5.1   | 0.2  | 6.5   | 0.8  | 545.9  | 269.7  | 5.1   | 0.2  |
| Root1-Spot 19                                                                          | 43   | 266   | 2.6 | 6.6303     | 47.7 | 0.0166  | 48.4 | 0.0008 | 7.9  | 0.16 | 5.1   | 0.4  | 16.7  | 8.0  | 2355.3 | 873.7  | 5.1   | 0.4  |
| Root -Spot 98                                                                          | 155  | 2619  | 1.6 | 19.6088    | 15.5 | 0.0056  | 16.0 | 0.0008 | 4.2  | 0.26 | 5.1   | 0.2  | 5.7   | 0.9  | 240.7  | 358.3  | 5.1   | 0.2  |
| Root -Spot 84                                                                          | 87   | 321   | 1.7 | 23.7062    | 23.6 | 0.0047  | 24.3 | 0.0008 | 5.9  | 0.24 | 5.2   | 0.3  | 4.7   | 1.1  | 215.6  | 599.4  | 5.2   | 0.3  |
| Root1-Spot 3                                                                           | 136  | 650   | 2.2 | 23.1090    | 32.0 | 0.0048  | 32.5 | 0.0008 | 5.5  | 0.17 | 5.2   | 0.3  | 4.9   | 1.6  | 151.8  | 812.9  | 5.2   | 0.3  |
| Root -Spot 91                                                                          | 102  | 4340  | 1.2 | 17.5673    | 12.9 | 0.0064  | 13.9 | 0.0008 | 5.1  | 0.37 | 5.2   | 0.3  | 6.5   | 0.9  | 488.6  |        |       |      |

|               |      |        |     |           |      |          |      |        |     |      |       |     |       |      |        |        |       |     |
|---------------|------|--------|-----|-----------|------|----------|------|--------|-----|------|-------|-----|-------|------|--------|--------|-------|-----|
| Root-Spot 16  | 97   | 664    | 2.0 | 10.2909   | 24.4 | 0.0113   | 25.0 | 0.0008 | 5.5 | 0.22 | 5.4   | 0.3 | 11.4  | 2.8  | 1570.5 | 464.7  | 5.4   | 0.3 |
| Root-Spot 27  | 460  | 868    | 1.4 | 28.7603   | 7.1  | 0.0041   | 7.5  | 0.0008 | 2.5 | 0.34 | 5.5   | 0.1 | 4.1   | 0.3  | 727.0  | 198.6  | 5.5   | 0.1 |
| Root-Spot 97  | 166  | 1345   | 2.0 | 25.2312   | 8.8  | 0.0047   | 9.5  | 0.0009 | 3.7 | 0.39 | 5.5   | 0.2 | 4.8   | 0.5  | 374.8  | 228.3  | 5.5   | 0.2 |
| Root-Spot 37  | 72   | 800    | 1.9 | 26.9842   | 14.3 | 0.0045   | 15.2 | 0.0009 | 5.0 | 0.33 | 5.6   | 0.3 | 4.5   | 0.7  | 552.2  | 387.3  | 5.6   | 0.3 |
| Root-Spot 41  | 1115 | 9640   | 4.1 | 19.9280   | 4.4  | 0.0061   | 4.9  | 0.0009 | 2.2 | 0.44 | 5.7   | 0.1 | 6.2   | 0.3  | 203.4  | 101.9  | 5.7   | 0.1 |
| Root1-Spot 7  | 36   | 525    | 1.3 | 5.6897    | 31.9 | 0.0238   | 33.2 | 0.0010 | 9.2 | 0.28 | 6.3   | 0.6 | 23.9  | 7.8  | 2613.2 | 546.5  | 6.3   | 0.6 |
| Root-Spot 18  | 268  | 822    | 3.8 | 25.1107   | 9.5  | 0.0054   | 9.8  | 0.0010 | 2.5 | 0.25 | 6.3   | 0.2 | 5.5   | 0.5  | 362.4  | 246.1  | 6.3   | 0.2 |
| Root-Spot 81  | 95   | 1785   | 2.4 | 15.3162   | 18.5 | 0.0089   | 19.2 | 0.0010 | 5.1 | 0.27 | 6.4   | 0.3 | 9.0   | 1.7  | 783.7  | 391.6  | 6.4   | 0.3 |
| Root-Spot 92  | 293  | 2129   | 2.3 | 22.5239   | 9.1  | 0.0061   | 9.4  | 0.0010 | 2.3 | 0.25 | 6.4   | 0.1 | 6.2   | 0.6  | 88.6   | 223.0  | 6.4   | 0.1 |
| Root-Spot 10  | 116  | 527    | 1.5 | 23.5889   | 31.7 | 0.0059   | 32.0 | 0.0010 | 4.4 | 0.14 | 6.5   | 0.3 | 5.9   | 1.9  | 203.1  | 811.5  | 6.5   | 0.3 |
| Root-Spot 64  | 138  | 572    | 3.0 | 26.7800   | 33.3 | 0.0052   | 33.6 | 0.0010 | 4.4 | 0.13 | 6.5   | 0.3 | 5.2   | 1.8  | 531.8  | 913.7  | 6.5   | 0.3 |
| Root-Spot 65  | 133  | 573    | 1.9 | 26.4419   | 15.4 | 0.0052   | 15.9 | 0.0010 | 4.0 | 0.25 | 6.5   | 0.3 | 5.3   | 0.8  | 497.9  | 412.4  | 6.5   | 0.3 |
| Root-Spot 6   | 189  | 1532   | 2.1 | 20.8679   | 11.7 | 0.0068   | 12.3 | 0.0010 | 3.7 | 0.30 | 6.6   | 0.2 | 6.9   | 0.8  | 95.4   | 277.2  | 6.6   | 0.2 |
| Root-Spot 22  | 381  | 7601   | 2.4 | 22.9730   | 6.4  | 0.0062   | 7.0  | 0.0010 | 2.9 | 0.41 | 6.6   | 0.2 | 6.2   | 0.4  | 137.2  | 158.5  | 6.6   | 0.2 |
| Root-Spot 77  | 253  | 7866   | 1.7 | 24.8291   | 6.8  | 0.0057   | 7.5  | 0.0010 | 3.2 | 0.42 | 6.7   | 0.2 | 5.8   | 0.4  | 333.3  | 174.4  | 6.7   | 0.2 |
| Root1-Spot 5  | 211  | 537    | 1.9 | 46.1092   | 9.7  | 0.0031   | 10.7 | 0.0010 | 4.4 | 0.41 | 6.7   | 0.3 | 3.1   | 0.3  | 2294.8 | 393.4  | 6.7   | 0.3 |
| Root1-Spot 11 | 235  | 2198   | 1.7 | 22.2541   | 10.7 | 0.0065   | 11.5 | 0.0010 | 4.1 | 0.36 | 6.7   | 0.3 | 6.5   | 0.7  | 59.1   | 261.6  | 6.7   | 0.3 |
| Root-Spot 99  | 105  | 300    | 2.4 | 208.7299  | 14.2 | 0.0007   | 15.1 | 0.0010 | 5.2 | 0.34 | 6.7   | 0.3 | 0.7   | 0.1  | 0.0    | 0.0    | 6.7   | 0.3 |
| Root1-Spot 31 | 130  | 590    | 1.6 | 19.1214   | 19.3 | 0.0075   | 19.8 | 0.0010 | 4.7 | 0.24 | 6.7   | 0.3 | 7.6   | 1.5  | 298.4  | 442.8  | 6.7   | 0.3 |
| Root-Spot 19  | 279  | 3137   | 3.3 | 21.6471   | 8.9  | 0.0067   | 9.5  | 0.0010 | 3.2 | 0.34 | 6.8   | 0.2 | 6.8   | 0.6  | 7.8    | 215.5  | 6.8   | 0.2 |
| Root-Spot 109 | 233  | 1022   | 1.7 | 23.2636   | 9.5  | 0.0062   | 9.9  | 0.0010 | 2.9 | 0.29 | 6.8   | 0.2 | 6.3   | 0.6  | 168.4  | 236.8  | 6.8   | 0.2 |
| Root1-Spot 14 | 268  | 887    | 1.8 | 35.7351   | 32.2 | 0.0041   | 32.3 | 0.0011 | 2.8 | 0.09 | 6.8   | 0.2 | 4.1   | 1.3  | 1378.0 | 1062.5 | 6.8   | 0.2 |
| Root-Spot 66  | 214  | 3696   | 1.7 | 21.3384   | 9.8  | 0.0069   | 10.3 | 0.0011 | 3.1 | 0.30 | 6.8   | 0.2 | 6.9   | 0.7  | 42.3   | 234.2  | 6.8   | 0.2 |
| Root-Spot 11  | 168  | 1015   | 2.2 | 21.8478   | 12.2 | 0.0067   | 12.7 | 0.0011 | 3.4 | 0.27 | 6.9   | 0.2 | 6.8   | 0.9  | 14.4   | 295.9  | 6.9   | 0.2 |
| Root-Spot 67  | 132  | 990    | 1.2 | 22.3803   | 13.5 | 0.0066   | 14.2 | 0.0011 | 4.4 | 0.31 | 6.9   | 0.3 | 6.7   | 0.9  | 72.9   | 331.1  | 6.9   | 0.3 |
| Root1-Spot 51 | 110  | 3007   | 1.7 | 28.6249   | 11.4 | 0.0052   | 12.4 | 0.0011 | 4.9 | 0.40 | 6.9   | 0.3 | 5.3   | 0.7  | 713.8  | 317.9  | 6.9   | 0.3 |
| Root-Spot 32  | 157  | 1045   | 2.8 | 21.1016   | 13.1 | 0.0071   | 13.5 | 0.0011 | 3.3 | 0.24 | 7.0   | 0.2 | 7.2   | 1.0  | 68.9   | 313.5  | 7.0   | 0.2 |
| Root1-Spot 4  | 241  | 800    | 2.4 | 37.6607   | 10.9 | 0.0040   | 11.4 | 0.0011 | 3.2 | 0.28 | 7.0   | 0.2 | 4.0   | 0.5  | 1551.0 | 367.7  | 7.0   | 0.2 |
| Root1-Spot 29 | 169  | 378    | 1.2 | -473.9548 | 9.6  | -0.0003  | 10.4 | 0.0011 | 3.8 | 0.37 | 7.0   | 0.3 | 0.3   | 0.0  | 0.0    | 0.0    | 7.0   | 0.3 |
| Root1-Spot 8  | 220  | 1029   | 1.9 | 24.1942   | 10.5 | 0.0062   | 11.1 | 0.0011 | 3.7 | 0.34 | 7.0   | 0.3 | 6.3   | 0.7  | 267.0  | 266.2  | 7.0   | 0.3 |
| Root-Spot 108 | 1545 | 26528  | 0.8 | 21.7764   | 4.1  | 0.0069   | 4.3  | 0.0011 | 1.2 | 0.28 | 7.0   | 0.1 | 7.0   | 0.3  | 6.5    | 99.3   | 7.0   | 0.1 |
| Root-Spot 87  | 109  | 3069   | 1.3 | 25.0960   | 11.8 | 0.0060   | 12.7 | 0.0011 | 4.5 | 0.35 | 7.0   | 0.3 | 6.1   | 0.8  | 360.8  | 307.3  | 7.0   | 0.3 |
| Root-Spot 28  | 265  | 1563   | 3.1 | 21.4432   | 10.1 | 0.0071   | 10.5 | 0.0011 | 3.0 | 0.28 | 7.1   | 0.2 | 7.1   | 0.7  | 30.6   | 242.6  | 7.1   | 0.2 |
| Root1-Spot 12 | 116  | 1342   | 2.6 | 26.0578   | 14.2 | 0.0058   | 15.3 | 0.0011 | 5.9 | 0.38 | 7.1   | 0.4 | 5.9   | 0.9  | 459.1  | 375.3  | 7.1   | 0.4 |
| Root-Spot 38  | 198  | 2426   | 2.4 | 19.9066   | 11.2 | 0.0076   | 11.6 | 0.0011 | 2.8 | 0.24 | 7.1   | 0.2 | 7.7   | 0.9  | 205.9  | 261.1  | 7.1   | 0.2 |
| Root1-Spot 33 | 131  | 345    | 1.3 | 82.6505   | 12.5 | 0.0018   | 13.4 | 0.0011 | 4.8 | 0.36 | 7.1   | 0.3 | 1.9   | 0.3  | 0.0    | 0.0    | 7.1   | 0.3 |
| Root1-Spot 55 | 233  | 1355   | 1.8 | 24.3898   | 9.7  | 0.0063   | 10.4 | 0.0011 | 3.9 | 0.37 | 7.1   | 0.3 | 6.3   | 0.7  | 287.5  | 247.1  | 7.1   | 0.3 |
| Root-Spot 96  | 294  | 16707  | 2.0 | 16.9106   | 8.9  | 0.0090   | 9.1  | 0.0011 | 2.1 | 0.23 | 7.1   | 0.1 | 9.1   | 0.8  | 572.0  | 193.9  | 7.1   | 0.1 |
| Root-Spot 20  | 255  | 1015   | 1.9 | 31.1787   | 9.6  | 0.0049   | 10.2 | 0.0011 | 3.4 | 0.34 | 7.1   | 0.2 | 5.0   | 0.5  | 958.2  | 282.1  | 7.1   | 0.2 |
| Root-Spot 86  | 226  | 14307  | 2.5 | 23.1446   | 8.1  | 0.0066   | 8.8  | 0.0011 | 3.5 | 0.40 | 7.2   | 0.3 | 6.7   | 0.6  | 155.7  | 200.7  | 7.2   | 0.3 |
| Root-Spot 29  | 357  | 2896   | 1.0 | 23.4469   | 8.5  | 0.0066   | 9.3  | 0.0011 | 3.7 | 0.40 | 7.2   | 0.3 | 6.6   | 0.6  | 188.0  | 213.4  | 7.2   | 0.3 |
| Root-Spot 25  | 205  | 1839   | 2.2 | 19.5594   | 9.7  | 0.0079   | 10.4 | 0.0011 | 3.6 | 0.35 | 7.2   | 0.3 | 8.0   | 0.8  | 246.5  | 223.9  | 7.2   | 0.3 |
| Root1-Spot 37 | 183  | 1919   | 2.9 | 21.0299   | 11.8 | 0.0074   | 12.7 | 0.0011 | 4.6 | 0.36 | 7.2   | 0.3 | 7.4   | 0.9  | 77.0   | 280.8  | 7.2   | 0.3 |
| Root-Spot 74  | 1051 | 10031  | 1.1 | 20.6822   | 5.0  | 0.0075   | 5.4  | 0.0011 | 2.1 | 0.40 | 7.2   | 0.2 | 7.6   | 0.4  | 116.5  | 116.9  | 7.2   | 0.2 |
| Root-Spot 8   | 96   | 6736   | 1.3 | 20.7313   | 12.5 | 0.0075   | 13.2 | 0.0011 | 4.3 | 0.33 | 7.3   | 0.3 | 7.6   | 1.0  | 110.8  | 296.3  | 7.3   | 0.3 |
| Root-Spot 73  | 281  | 4952   | 2.3 | 20.8793   | 9.3  | 0.0075   | 9.7  | 0.0011 | 2.7 | 0.28 | 7.3   | 0.2 | 7.6   | 0.7  | 94.1   | 220.5  | 7.3   | 0.2 |
| Root-Spot 26  | 379  | 3397   | 1.6 | 20.4910   | 8.3  | 0.0076   | 8.6  | 0.0011 | 2.5 | 0.29 | 7.3   | 0.2 | 7.7   | 0.7  | 138.3  | 194.2  | 7.3   | 0.2 |
| Root-Spot 80  | 833  | 4678   | 0.9 | 7.1522    | 19.8 | 0.0222   | 20.0 | 0.0012 | 2.6 | 0.13 | 7.4   | 0.2 | 22.3  | 4.4  | 2224.9 | 346.9  | 7.4   | 0.2 |
| Root-Spot 72  | 39   | 1683   | 1.6 | 33.1476   | 11.4 | 0.0048   | 13.8 | 0.0012 | 7.8 | 0.57 | 7.4   | 0.6 | 4.9   | 0.7  | 1141.7 | 349.9  | 7.4   | 0.6 |
| Root-Spot 50  | 165  | 880    | 2.2 | 4.7109    | 22.4 | 0.0386   | 22.7 | 0.0013 | 3.3 | 0.15 | 8.5   | 0.3 | 38.5  | 8.6  | 2923.0 | 368.3  | 8.5   | 0.3 |
| Root-Spot 21  | 79   | 3453   | 1.9 | 3.6967    | 50.0 | 0.0516   | 50.3 | 0.0014 | 5.3 | 0.11 | 8.9   | 0.5 | 51.1  | 25.1 | 3309.0 | 850.5  | 8.9   | 0.5 |
| Root-Spot 89  | 252  | 2462   | 1.3 | 3.6989    | 48.3 | 0.0534   | 48.8 | 0.0014 | 7.0 | 0.14 | 9.2   | 0.6 | 52.8  | 25.1 | 3308.0 | 816.2  | 9.2   | 0.6 |
| Root1-Spot 22 | 297  | 9861   | 3.2 | 21.1844   | 3.6  | 0.0533   | 3.9  | 0.0082 | 1.5 | 0.39 | 52.6  | 0.8 | 52.8  | 2.0  | 59.6   | 85.3   | 52.6  | 0.8 |
| Root1-Spot 9  | 313  | 9441   | 3.5 | 19.8767   | 3.9  | 0.0624   | 4.2  | 0.0090 | 1.8 | 0.41 | 57.8  | 1.0 | 61.5  | 2.5  | 209.3  | 89.5   | 57.8  | 1.0 |
| Root1-Spot 28 | 301  | 33397  | 4.5 | 17.5806   | 5.2  | 0.0914   | 5.4  | 0.0117 | 1.3 | 0.23 | 74.7  | 0.9 | 88.8  | 4.6  | 486.9  | 115.4  | 74.7  | 0.9 |
| Root-Spot 90  | 104  | 35692  | 2.0 | 20.3665   | 3.4  | 0.1554   | 3.6  | 0.0230 | 1.2 | 0.34 | 146.3 | 1.8 | 146.7 | 5.0  | 152.6  | 80.1   | 146.3 | 1.8 |
| Root-Spot 44  | 305  | 182410 | 2.1 | 20.2737   | 2.0  | 0.1574   | 2.2  | 0.0231 | 1.1 | 0.48 | 147.5 | 1.6 | 148.4 | 3.1  | 163.3  | 45.7   | 147.5 | 1.6 |
| Root1-Spot 42 | 107  | 9220   | 2.2 | 19.9827   | 4.6  | 0.1605   | 4.8  | 0.0233 | 1.6 | 0.33 | 148.2 | 2.3 | 151.1 | 6.8  | 197.0  | 106.4  | 148.2 | 2.3 |
| Root-Spot 55  | 80   | 20079  | 1.5 | 21.1109   | 3.9  | 0.1522   | 4.1  | 0.0233 | 1.2 | 0.30 | 148.5 | 1.8 | 143.9 | 5.5  | 67.9   | 92.5   | 148.5 | 1.8 |
| Root-Spot 107 | 170  | 24837  | 2.4 | 19.5046   | 2.4  | 0.1651   | 2.7  | 0.0234 | 1.1 | 0.42 | 148.8 | 1.6 | 155.1 | 3.9  | 253.0  | 56.1   | 148.8 | 1.6 |
| Root-Spot 23  | 211  | 45987  | 2.3 | 20.1590   | 2.5  | 0.1615   | 2.6  | 0.0236 | 0.9 | 0.32 | 150.4 | 1.3 | 152.0 | 3.7  | 176.5  | 58.4   | 150.4 | 1.3 |
| Root-Spot 63  | 252  | 44605  | 2.3 | 20.0959   | 2.2  | 0.1630   | 2.4  | 0.0238 | 1.1 | 0.45 | 151.3 | 1.7 | 153.3 | 3.5  | 183.8  | 50.9   | 151.3 | 1.7 |
| Root-Spot 57  | 161  | 59610  | 1.6 | 19.9786   | 2.8  | 0.1640   | 3.1  | 0.0238 | 1.2 | 0.39 | 151.4 | 1.8 | 154.2 | 4.4  | 197.5  | 65.5   | 151.4 | 1.8 |
| Root1-Spot 13 | 356  | 187716 | 2.2 | 20.2726   | 2.4  | 0.1619   | 2.6  | 0.0238 | 1.1 | 0.40 | 151.7 | 1.6 | 152.4 | 3.7  | 163.4  | 56.0   | 151.7 | 1.6 |
| Root1-Spot 35 | 94   | 7985   | 1.6 | 20.3963   | 4.9  | 0.1627   | 5.2  | 0.0241 | 1.7 | 0.32 | 153.3 | 2.5 | 153.0 | 7.4  | 149.2  | 115.3  | 153.3 | 2.5 |
| Root-Spot 71  | 580  | 204603 | 4.6 | 20.7601   | 1.7  | 0.1601   | 2.1  | 0.0241 | 1.2 | 0.59 | 153.6 | 1.9 | 150.8 | 3.0  | 107.6  | 40.5   | 153.6 | 1.9 |
| Root1-Spot 20 | 59   | 3433   | 2.1 | 22.3932   | 5.2  | 0.1493   | 5.5  | 0.0242 | 1.9 | 0.35 | 154.4 | 2.9 | 141.3 | 7.3  | 74.3   | 127.1  | 154.4 | 2.9 |
| Root-Spot 62  | 103  | 40751  | 2.2 | 17.7630   | 3.6  | 0.1917   | 3.9  | 0.0247 | 1.4 | 0.36 | 157.2 | 2.2 | 178.0 | 6.4  | 464.1  | 80.8   | 157.2 | 2.2 |
| Root1-Spot 21 | 54   | 22425  | 2.1 | 19.4352   | 5.1  | 0.1775   | 5.3  | 0.0250 | 1.6 | 0.29 | 159.3 | 2.4 | 165.9 | 8.2  | 261.2  | 117.3  | 159.3 | 2.4 |
| Root-Spot 85  | 140  | 36742  | 2.7 | 21.1210   | 3.0  | 0.1678</ |      |        |     |      |       |     |       |      |        |        |       |     |

|                 |     |       |     |         |      |        |      |        |     |      |       |     |       |      |        |       |       |     |
|-----------------|-----|-------|-----|---------|------|--------|------|--------|-----|------|-------|-----|-------|------|--------|-------|-------|-----|
| Kotsina-Spot 35 | 65  | 304   | 2.1 | 21.6064 | 25.0 | 0.0039 | 26.4 | 0.0006 | 8.6 | 0.33 | 3.9   | 0.3 | 4.0   | 1.0  | 12.4   | 608.1 | 3.9   | 0.3 |
| Kotsina-Spot 13 | 115 | 609   | 1.5 | 30.6238 | 14.4 | 0.0028 | 15.7 | 0.0006 | 6.3 | 0.40 | 4.0   | 0.2 | 2.8   | 0.4  | 905.7  | 420.3 | 4.0   | 0.2 |
| Kotsina-Spot 3  | 130 | 756   | 1.7 | 22.1563 | 28.5 | 0.0039 | 29.1 | 0.0006 | 5.7 | 0.20 | 4.1   | 0.2 | 4.0   | 1.2  | 48.4   | 705.2 | 4.1   | 0.2 |
| Kotsina-Spot 18 | 110 | 791   | 1.4 | 65.8828 | 11.9 | 0.0013 | 13.8 | 0.0006 | 7.0 | 0.51 | 4.1   | 0.3 | 1.3   | 0.2  | 0.0    | 0.0   | 4.1   | 0.3 |
| Kotsina-Spot 12 | 68  | 308   | 2.5 | 6.3100  | 50.0 | 0.0143 | 50.6 | 0.0007 | 7.8 | 0.15 | 4.2   | 0.3 | 14.4  | 7.3  | 2439.5 | 914.7 | 4.2   | 0.3 |
| Kotsina-Spot 19 | 418 | 1113  | 1.1 | 26.7434 | 9.8  | 0.0037 | 10.3 | 0.0007 | 3.3 | 0.32 | 4.7   | 0.2 | 3.8   | 0.4  | 528.2  | 262.5 | 4.7   | 0.2 |
| Kotsina-Spot 6  | 174 | 1237  | 2.1 | 29.4238 | 12.2 | 0.0038 | 12.7 | 0.0008 | 3.7 | 0.29 | 5.2   | 0.2 | 3.9   | 0.5  | 791.1  | 345.7 | 5.2   | 0.2 |
| Kotsina-Spot 11 | 171 | 671   | 1.6 | 44.3742 | 52.1 | 0.0025 | 52.2 | 0.0008 | 4.0 | 0.08 | 5.2   | 0.2 | 2.6   | 1.3  | 2143.1 | 24.6  | 5.2   | 0.2 |
| Kotsina-Spot 20 | 346 | 5071  | 1.6 | 20.9660 | 9.4  | 0.0067 | 9.9  | 0.0010 | 3.1 | 0.31 | 6.6   | 0.2 | 6.8   | 0.7  | 84.2   | 224.1 | 6.6   | 0.2 |
| Kotsina-Spot 15 | 64  | 8934  | 4.0 | 19.9883 | 5.6  | 0.1542 | 5.9  | 0.0224 | 1.8 | 0.31 | 142.5 | 2.6 | 145.6 | 8.0  | 196.4  | 129.8 | 142.5 | 2.6 |
| Kotsina-Spot 10 | 480 | 30900 | 1.7 | 20.2571 | 1.8  | 0.1563 | 2.1  | 0.0230 | 1.1 | 0.52 | 146.4 | 1.6 | 147.5 | 2.9  | 165.2  | 42.1  | 146.4 | 1.6 |
| Kotsina-Spot 2  | 219 | 9091  | 2.9 | 20.3882 | 2.2  | 0.1560 | 2.5  | 0.0231 | 1.1 | 0.45 | 147.0 | 1.6 | 147.2 | 3.4  | 150.1  | 51.4  | 147.0 | 1.6 |
| Kotsina-Spot 29 | 259 | 36063 | 4.5 | 19.9092 | 3.1  | 0.1603 | 3.4  | 0.0231 | 1.4 | 0.41 | 147.5 | 2.0 | 151.0 | 4.7  | 205.5  | 71.2  | 147.5 | 2.0 |
| Kotsina-Spot 14 | 168 | 9652  | 3.4 | 20.4340 | 3.7  | 0.1562 | 3.9  | 0.0232 | 1.2 | 0.31 | 147.5 | 1.8 | 147.4 | 5.4  | 144.8  | 87.0  | 147.5 | 1.8 |
| Kotsina-Spot 27 | 123 | 22938 | 3.3 | 20.6835 | 3.5  | 0.1555 | 3.7  | 0.0233 | 1.3 | 0.36 | 148.7 | 2.0 | 146.8 | 5.1  | 116.3  | 81.9  | 148.7 | 2.0 |
| Kotsina-Spot 8  | 253 | 23455 | 3.0 | 19.8978 | 2.8  | 0.1617 | 3.3  | 0.0233 | 1.7 | 0.52 | 148.7 | 2.5 | 152.2 | 4.6  | 206.9  | 65.0  | 148.7 | 2.5 |
| Kotsina-Spot 25 | 363 | 43266 | 3.8 | 20.8524 | 1.9  | 0.1559 | 2.3  | 0.0236 | 1.3 | 0.57 | 150.2 | 1.9 | 147.1 | 3.1  | 97.1   | 44.1  | 150.2 | 1.9 |
| Kotsina-Spot 4  | 640 | 45646 | 2.7 | 20.4305 | 1.7  | 0.1632 | 2.1  | 0.0242 | 1.3 | 0.63 | 154.1 | 2.0 | 153.5 | 3.1  | 145.2  | 39.3  | 154.1 | 2.0 |
| Kotsina-Spot 22 | 21  | 3026  | 0.3 | 6.3643  | 4.5  | 0.5593 | 5.2  | 0.0258 | 2.5 | 0.48 | 164.3 | 4.0 | 451.1 | 18.8 | 2424.9 | 76.9  | 164.3 | 4.0 |
| Kotsina-Spot 24 | 262 | 38232 | 2.0 | 18.7381 | 1.8  | 0.3618 | 2.3  | 0.0492 | 1.4 | 0.60 | 309.4 | 4.1 | 313.5 | 6.1  | 344.4  | 41.0  | 309.4 | 4.1 |

#### Kuskalana River

|                    |      |        |     |         |      |        |      |        |     |      |     |     |      |     |        |       |     |     |
|--------------------|------|--------|-----|---------|------|--------|------|--------|-----|------|-----|-----|------|-----|--------|-------|-----|-----|
| Kuskalana-Spot 57  | 452  | 6911   | 1.3 | 23.0209 | 10.9 | 0.0030 | 11.8 | 0.0005 | 4.6 | 0.39 | 3.2 | 0.1 | 3.0  | 0.4 | 142.4  | 270.1 | 3.2 | 0.1 |
| Kuskalana-Spot 47  | 107  | 2485   | 1.8 | 17.9744 | 10.6 | 0.0038 | 13.1 | 0.0005 | 7.8 | 0.59 | 3.2 | 0.3 | 3.9  | 0.5 | 437.8  | 235.4 | 3.2 | 0.3 |
| Kuskalana-Spot 20  | 144  | 4486   | 0.9 | 13.6627 | 15.4 | 0.0051 | 17.1 | 0.0005 | 7.6 | 0.44 | 3.3 | 0.2 | 5.2  | 0.9 | 1019.2 | 312.6 | 3.3 | 0.2 |
| Kuskalana-Spot 39  | 202  | 1190   | 1.4 | 13.5923 | 21.4 | 0.0053 | 22.3 | 0.0005 | 6.3 | 0.28 | 3.4 | 0.2 | 5.4  | 1.2 | 1029.7 | 436.8 | 3.4 | 0.2 |
| Kuskalana-Spot 12  | 90   | 8850   | 0.9 | 9.1055  | 15.6 | 0.0080 | 18.4 | 0.0005 | 9.8 | 0.53 | 3.4 | 0.3 | 8.1  | 1.5 | 1796.5 | 285.5 | 3.4 | 0.3 |
| Kuskalana-Spot 56  | 207  | 4933   | 1.3 | 9.8990  | 24.9 | 0.0074 | 25.3 | 0.0005 | 4.3 | 0.17 | 3.4 | 0.1 | 7.5  | 1.9 | 1642.9 | 469.7 | 3.4 | 0.1 |
| Kuskalana-Spot 30  | 123  | 1287   | 1.2 | 34.4846 | 16.0 | 0.0022 | 17.2 | 0.0005 | 6.3 | 0.36 | 3.5 | 0.2 | 2.2  | 0.4 | 1264.5 | 506.9 | 3.5 | 0.2 |
| Kuskalana-Spot 67  | 170  | 5348   | 1.4 | 16.6100 | 17.1 | 0.0046 | 17.9 | 0.0006 | 5.2 | 0.29 | 3.5 | 0.2 | 4.6  | 0.8 | 610.9  | 371.8 | 3.5 | 0.2 |
| Kuskalana-Spot 52  | 364  | 5603   | 0.9 | 19.2111 | 11.4 | 0.0040 | 12.0 | 0.0006 | 3.6 | 0.30 | 3.6 | 0.1 | 4.0  | 0.5 | 287.7  | 262.3 | 3.6 | 0.1 |
| Kuskalana-Spot 100 | 163  | 4462   | 1.4 | 26.2668 | 12.4 | 0.0029 | 14.1 | 0.0006 | 6.6 | 0.47 | 3.6 | 0.2 | 3.0  | 0.4 | 480.3  | 330.9 | 3.6 | 0.2 |
| Kuskalana-Spot 88  | 1565 | 22919  | 0.8 | 16.3586 | 9.9  | 0.0047 | 10.2 | 0.0006 | 2.4 | 0.23 | 3.6 | 0.1 | 4.8  | 0.5 | 643.8  | 214.1 | 3.6 | 0.1 |
| Kuskalana-Spot 71  | 287  | 7233   | 0.8 | 16.5301 | 16.4 | 0.0047 | 17.2 | 0.0006 | 5.2 | 0.30 | 3.6 | 0.2 | 4.7  | 0.8 | 621.3  | 356.3 | 3.6 | 0.2 |
| Kuskalana-Spot 18  | 757  | 9486   | 1.1 | 15.2105 | 9.8  | 0.0051 | 10.3 | 0.0006 | 3.1 | 0.30 | 3.6 | 0.1 | 5.1  | 0.5 | 798.2  | 206.2 | 3.6 | 0.1 |
| Kuskalana-Spot 37  | 116  | 3062   | 1.2 | 14.4477 | 18.8 | 0.0053 | 21.0 | 0.0006 | 9.3 | 0.44 | 3.6 | 0.3 | 5.4  | 1.1 | 905.1  | 391.1 | 3.6 | 0.3 |
| Kuskalana-Spot 73  | 301  | 6910   | 1.0 | 12.4801 | 15.3 | 0.0062 | 15.7 | 0.0006 | 3.8 | 0.24 | 3.6 | 0.1 | 6.3  | 1.0 | 1200.1 | 302.8 | 3.6 | 0.1 |
| Kuskalana-Spot 65  | 306  | 2330   | 1.2 | 19.8633 | 14.1 | 0.0039 | 14.8 | 0.0006 | 4.5 | 0.31 | 3.6 | 0.2 | 4.0  | 0.6 | 210.9  | 327.6 | 3.6 | 0.2 |
| Kuskalana-Spot 48  | 323  | 16159  | 1.3 | 17.4695 | 12.3 | 0.0045 | 13.2 | 0.0006 | 4.8 | 0.36 | 3.7 | 0.2 | 4.5  | 0.6 | 500.9  | 272.2 | 3.7 | 0.2 |
| Kuskalana-Spot 94  | 109  | 1572   | 1.3 | 30.7940 | 10.3 | 0.0026 | 13.0 | 0.0006 | 8.0 | 0.61 | 3.7 | 0.3 | 2.6  | 0.3 | 921.9  | 300.2 | 3.7 | 0.3 |
| Kuskalana-Spot 72  | 100  | 1928   | 0.9 | 24.8027 | 11.8 | 0.0032 | 14.7 | 0.0006 | 8.8 | 0.60 | 3.7 | 0.3 | 3.2  | 0.5 | 330.5  | 304.5 | 3.7 | 0.3 |
| Kuskalana-Spot 81  | 283  | 2863   | 1.3 | 14.1537 | 16.2 | 0.0056 | 16.5 | 0.0006 | 3.3 | 0.20 | 3.7 | 0.1 | 5.7  | 0.9 | 947.4  | 333.7 | 3.7 | 0.1 |
| Kuskalana-Spot 2   | 215  | 2570   | 1.0 | 15.8539 | 18.6 | 0.0050 | 19.3 | 0.0006 | 5.3 | 0.28 | 3.7 | 0.2 | 5.1  | 1.0 | 710.8  | 398.5 | 3.7 | 0.2 |
| Kuskalana-Spot 6   | 262  | 3205   | 1.1 | 20.9118 | 13.5 | 0.0038 | 14.7 | 0.0006 | 5.8 | 0.39 | 3.7 | 0.2 | 3.9  | 0.6 | 90.3   | 321.2 | 3.7 | 0.2 |
| Kuskalana-Spot 90  | 731  | 6746   | 0.6 | 20.5871 | 8.6  | 0.0039 | 9.5  | 0.0006 | 4.0 | 0.42 | 3.7 | 0.1 | 3.9  | 0.4 | 127.3  | 203.5 | 3.7 | 0.1 |
| Kuskalana-Spot 89  | 186  | 4181   | 1.0 | 26.0962 | 12.3 | 0.0031 | 13.5 | 0.0006 | 5.6 | 0.41 | 3.7 | 0.2 | 3.1  | 0.4 | 463.0  | 326.8 | 3.7 | 0.2 |
| Kuskalana-Spot 19  | 229  | 16492  | 1.4 | 28.1694 | 10.0 | 0.0028 | 11.4 | 0.0006 | 5.5 | 0.48 | 3.7 | 0.2 | 2.9  | 0.3 | 669.4  | 276.7 | 3.7 | 0.2 |
| Kuskalana-Spot 10  | 141  | 1072   | 1.7 | 17.9486 | 19.3 | 0.0045 | 20.5 | 0.0006 | 7.0 | 0.34 | 3.7 | 0.3 | 4.5  | 0.9 | 441.0  | 433.2 | 3.7 | 0.3 |
| Kuskalana-Spot 69  | 331  | 5272   | 0.9 | 20.2328 | 12.3 | 0.0039 | 12.6 | 0.0006 | 2.8 | 0.22 | 3.7 | 0.1 | 4.0  | 0.5 | 168.0  | 287.3 | 3.7 | 0.1 |
| Kuskalana-Spot 58  | 182  | 3206   | 1.1 | 18.8301 | 16.3 | 0.0043 | 17.1 | 0.0006 | 5.2 | 0.31 | 3.7 | 0.2 | 4.3  | 0.7 | 333.3  | 371.7 | 3.7 | 0.2 |
| Kuskalana-Spot 60  | 169  | 10430  | 1.5 | 10.3648 | 23.6 | 0.0077 | 24.5 | 0.0006 | 6.8 | 0.28 | 3.7 | 0.3 | 7.8  | 1.9 | 1557.1 | 448.8 | 3.7 | 0.3 |
| Kuskalana-Spot 24  | 366  | 15126  | 1.0 | 20.8919 | 9.4  | 0.0039 | 9.9  | 0.0006 | 3.4 | 0.34 | 3.8 | 0.1 | 3.9  | 0.4 | 92.6   | 222.0 | 3.8 | 0.1 |
| Kuskalana-Spot 29  | 160  | 5105   | 1.2 | 17.6060 | 17.2 | 0.0046 | 17.9 | 0.0006 | 5.2 | 0.29 | 3.8 | 0.2 | 4.6  | 0.8 | 483.8  | 381.5 | 3.8 | 0.2 |
| Kuskalana-Spot 104 | 228  | 223270 | 1.3 | 24.5345 | 11.8 | 0.0033 | 12.6 | 0.0006 | 4.5 | 0.36 | 3.8 | 0.2 | 3.3  | 0.4 | 302.6  | 301.5 | 3.8 | 0.2 |
| Kuskalana-Spot 61  | 140  | 280061 | 1.0 | 20.4035 | 14.7 | 0.0040 | 16.0 | 0.0006 | 6.3 | 0.39 | 3.8 | 0.2 | 4.0  | 0.6 | 148.4  | 345.6 | 3.8 | 0.2 |
| Kuskalana-Spot 64  | 145  | 143792 | 1.6 | 28.1393 | 10.7 | 0.0029 | 12.6 | 0.0006 | 6.7 | 0.53 | 3.8 | 0.3 | 2.9  | 0.4 | 666.4  | 295.2 | 3.8 | 0.3 |
| Kuskalana-Spot 44  | 285  | 2529   | 1.3 | 24.6947 | 10.4 | 0.0033 | 11.2 | 0.0006 | 4.1 | 0.37 | 3.8 | 0.2 | 3.3  | 0.4 | 319.3  | 267.9 | 3.8 | 0.2 |
| Kuskalana-Spot 77  | 140  | 1557   | 1.9 | 36.6582 | 11.8 | 0.0022 | 13.8 | 0.0006 | 7.1 | 0.52 | 3.8 | 0.3 | 2.2  | 0.3 | 1461.2 | 390.9 | 3.8 | 0.3 |
| Kuskalana-Spot 34  | 216  | 4614   | 1.2 | 19.9532 | 13.9 | 0.0041 | 14.7 | 0.0006 | 5.0 | 0.34 | 3.8 | 0.2 | 4.1  | 0.6 | 200.5  | 323.5 | 3.8 | 0.2 |
| Kuskalana-Spot 109 | 345  | 6082   | 0.7 | 10.6820 | 16.0 | 0.0076 | 16.6 | 0.0006 | 4.6 | 0.28 | 3.8 | 0.2 | 7.7  | 1.3 | 1500.3 | 303.7 | 3.8 | 0.2 |
| Kuskalana-Spot 4   | 321  | 87161  | 0.9 | 11.3720 | 17.8 | 0.0072 | 18.1 | 0.0006 | 3.2 | 0.18 | 3.8 | 0.1 | 7.3  | 1.3 | 1381.0 | 345.2 | 3.8 | 0.1 |
| Kuskalana-Spot 31  | 141  | 2559   | 1.2 | 19.4761 | 14.4 | 0.0042 | 16.0 | 0.0006 | 7.1 | 0.44 | 3.8 | 0.3 | 4.3  | 0.7 | 256.4  | 331.6 | 3.8 | 0.3 |
| Kuskalana-Spot 96  | 239  | 5090   | 1.0 | 18.6445 | 14.2 | 0.0044 | 15.5 | 0.0006 | 6.1 | 0.39 | 3.8 | 0.2 | 4.5  | 0.7 | 355.8  | 322.8 | 3.8 | 0.2 |
| Kuskalana-Spot 23  | 109  | 1863   | 1.1 | 9.2538  | 23.3 | 0.0089 | 24.1 | 0.0006 | 6.0 | 0.25 | 3.9 | 0.2 | 9.0  | 2.2 | 1767.0 | 431.8 | 3.9 | 0.2 |
| Kuskalana-Spot 7   | 217  | 6371   | 0.8 | 15.8211 | 15.9 | 0.0052 | 16.7 | 0.0006 | 5.1 | 0.31 | 3.9 | 0.2 | 5.3  | 0.9 | 715.2  | 339.4 | 3.9 | 0.2 |
| Kuskalana-Spot 35  | 119  | 1132   | 0.9 | 20.8855 | 14.1 | 0.0040 | 16.1 | 0.0006 | 7.8 | 0.49 | 3.9 | 0.3 | 4.0  | 0.6 | 93.3   | 334.4 | 3.9 | 0.3 |
| Kuskalana-Spot 11  | 168  | 6672   | 1.2 | 17.0520 | 16.7 | 0.0049 | 17.9 | 0.0006 | 6.6 | 0.37 | 3.9 | 0.3 | 4.9  | 0.9 | 553.9  | 366.3 | 3.9 | 0.3 |
| Kuskalana-Spot 21  | 176  | 2051   | 0.8 | 27.6182 | 12.1 | 0.0030 | 13.6 | 0.0006 | 6.2 | 0.46 | 3.9 | 0.2 | 3.1  | 0.4 | 615.2  | 331.9 | 3.9 | 0.2 |
| Kuskalana-Spot 78  | 176  | 13409  | 1.6 | 20.1515 | 15.2 | 0.0041 | 15.9 | 0.0006 | 4.6 | 0.29 | 3.9 | 0.2 | 4.2  | 0.7 | 177.4  | 356.0 | 3.9 | 0.2 |
| Kuskalana-Spot 84  | 240  | 14639  | 0.7 | 6.0606  | 23.2 | 0.0138 | 23.6 | 0.0006 | 4.6 | 0.19 | 3.9 | 0.2 | 13.9 | 3.3 | 2507.5 | 395.4 | 3.9 | 0.2 |
| Kuskalana-Spot 46  | 162  | 2213   | 1.4 | 16.0139 | 16.3 | 0.0052 | 17.7 | 0.0006 | 6.7 | 0.38 | 3.9 | 0.3 | 5.3  | 0.9 | 689.4  | 350.8 | 3.9 | 0.3 |
| Kuskalana-Spot 106 | 217  | 5762   | 1.1 | 10.8879 | 24.2 | 0.0077 | 24.9 | 0.0006 | 5.6 | 0.23 | 3.9 | 0.2 | 7.8  | 1.9 | 1464.2 | 467.3 | 3.9 | 0.2 |
| Kuskalana-Spot 108 | 201  | 4757   | 1.1 | 18.4740 | 13.2 | 0.0045 | 14.0 | 0.0006 | 4.4 | 0.32 | 3.9 | 0.2 | 4.6  | 0.6 | 376.4  | 298.7 | 3.9 | 0.2 |
| Kuskalana-Spot 99  | 192  | 10495  | 1.6 | 29.0614 | 10.5 | 0.0029 | 12.0 | 0.0006 | 5.8 | 0.48 | 3.9 | 0.2 | 2.9  | 0.4 | 756.2  | 295.3 | 3.9 | 0.2 |
| Kuskalana-Spot 59  | 530  | 11538  | 0.8 | 17.5034 | 11.8 | 0.0048 | 12.4 | 0.0006 | 3.7 | 0.30 | 3.9 | 0.1 | 4.9  | 0.6 | 496.6  | 261.7 | 3.9 | 0.1 |
| Kuskalana-Spot 50  | 315  | 14443  | 0.9 | 18.4411 | 10.7 | 0.0046 | 12.0 | 0.0006 | 5.4 | 0.45 | 3.9 | 0.2 | 4.6  | 0.6 | 380.5  | 241.8 | 3.9 | 0.2 |
| Kuskalana-Spot 102 | 101  | 1914   | 1.5 | 22.7588 | 10.8 | 0.0037 | 12.9 | 0.0006 | 7.0 | 0.54 | 4.0 | 0.3 | 3.8  | 0.5 | 114.1  | 267.6 | 4.0 | 0.3 |
| Kuskalana-Spot 5   | 110  | 3282   | 1.4 | 33.2727 | 9.5  | 0.0026 | 12.6 | 0.0006 | 8.3 | 0.66 | 4.0 | 0.3 | 2.6  | 0.3 | 1153.3 | 292.8 | 4.0 | 0.3 |
| Kuskalana-Spot 8   | 206  | 7119   | 1.0 | 22.3233 | 11.6 | 0.0038 | 12.8 | 0.0006 | 5.5 | 0.43 | 4.0 | 0.2 | 3.9  | 0.5 | 66.7   | 282.9 | 4.0 | 0.2 |
| Kuskalana-Spot 105 | 124  | 2200   | 1.2 | 14.6324 | 16.6 | 0.0059 | 17.7 | 0.0006 | 6.2 | 0.35 | 4.0 | 0.3 | 6.0  | 1.1 | 878.9  | 346.1 | 4.0 | 0.3 |
| Kuskalana-Spot 26  | 511  | 17555  | 0.8 | 11.4950 | 15.2 | 0.0075 | 15.6 | 0.0006 | 3.5 | 0.22 | 4.0 | 0.1 | 7.6  | 1.2 | 1380.3 | 294.2 | 4.0 | 0.1 |
| Kuskalana-Spot 51  | 185  | 3686   | 1.2 | 20.4896 | 13.4 | 0.0042 | 13.9 | 0.0006 | 3.8 | 0.27 | 4.1 | 0.2 | 4.3  | 0.6 | 138.5  | 316.1 | 4.1 | 0.2 |

|                     |      |       |     |         |      |        |      |        |     |      |     |     |      |      |        |       |     |     |
|---------------------|------|-------|-----|---------|------|--------|------|--------|-----|------|-----|-----|------|------|--------|-------|-----|-----|
| Kuskalana-Spot 76   | 148  | 10863 | 1.3 | 26.9479 | 11.3 | 0.0032 | 14.3 | 0.0006 | 8.7 | 0.61 | 4.1 | 0.4 | 3.3  | 0.5  | 548.6  | 303.6 | 4.1 | 0.4 |
| Kuskalana-Spot 82   | 212  | 3518  | 1.0 | 17.9460 | 15.7 | 0.0049 | 16.6 | 0.0006 | 5.4 | 0.33 | 4.1 | 0.2 | 4.9  | 0.8  | 441.3  | 350.4 | 4.1 | 0.2 |
| Kuskalana-Spot 92   | 136  | 1372  | 1.2 | 15.3198 | 21.8 | 0.0057 | 22.9 | 0.0006 | 7.2 | 0.31 | 4.1 | 0.3 | 5.8  | 1.3  | 783.2  | 462.5 | 4.1 | 0.3 |
| Kuskalana-Spot 110  | 150  | 12878 | 1.1 | 19.0703 | 14.8 | 0.0046 | 16.3 | 0.0006 | 6.8 | 0.41 | 4.1 | 0.3 | 4.6  | 0.8  | 304.5  | 339.5 | 4.1 | 0.3 |
| Kuskalana-Spot 22   | 109  | 3480  | 1.6 | 22.5119 | 13.0 | 0.0039 | 14.8 | 0.0006 | 7.1 | 0.48 | 4.1 | 0.3 | 3.9  | 0.6  | 87.3   | 320.5 | 4.1 | 0.3 |
| Kuskalana-Spot 3    | 157  | 12725 | 1.5 | 17.1291 | 13.9 | 0.0051 | 15.9 | 0.0006 | 7.8 | 0.49 | 4.1 | 0.3 | 5.2  | 0.8  | 544.1  | 304.1 | 4.1 | 0.3 |
| Kuskalana-Spot 62   | 127  | 6158  | 0.9 | 14.7941 | 14.6 | 0.0059 | 15.9 | 0.0006 | 6.3 | 0.40 | 4.1 | 0.3 | 6.0  | 1.0  | 856.1  | 303.8 | 4.1 | 0.3 |
| Kuskalana-Spot 43   | 197  | 3152  | 1.4 | 18.9948 | 14.0 | 0.0046 | 15.0 | 0.0006 | 5.5 | 0.37 | 4.1 | 0.2 | 4.7  | 0.7  | 313.6  | 320.1 | 4.1 | 0.2 |
| Kuskalana-Spot 16   | 280  | 28841 | 1.5 | 6.5648  | 31.7 | 0.0136 | 32.0 | 0.0006 | 4.3 | 0.14 | 4.2 | 0.2 | 13.7 | 4.3  | 2372.2 | 555.6 | 4.2 | 0.2 |
| Kuskalana-Spot 91   | 279  | 3083  | 0.8 | 13.9094 | 15.7 | 0.0064 | 16.5 | 0.0007 | 5.2 | 0.31 | 4.2 | 0.2 | 6.5  | 1.1  | 983.0  | 320.8 | 4.2 | 0.2 |
| Kuskalana-Spot 40   | 112  | 3691  | 1.1 | 5.1080  | 50.0 | 0.0176 | 50.4 | 0.0007 | 6.5 | 0.13 | 4.2 | 0.3 | 17.7 | 8.8  | 2791.2 | 886.0 | 4.2 | 0.3 |
| Kuskalana-Spot 101  | 189  | 1664  | 1.2 | 6.2371  | 43.7 | 0.0145 | 44.1 | 0.0007 | 6.5 | 0.15 | 4.2 | 0.3 | 14.6 | 6.4  | 2459.1 | 781.3 | 4.2 | 0.3 |
| Kuskalana-Spot 95   | 426  | 25463 | 0.9 | 8.8359  | 20.9 | 0.0102 | 21.3 | 0.0007 | 4.1 | 0.19 | 4.2 | 0.2 | 10.3 | 2.2  | 1851.0 | 383.1 | 4.2 | 0.2 |
| Kuskalana-Spot 1    | 138  | 1640  | 1.6 | 21.8940 | 13.4 | 0.0042 | 15.2 | 0.0007 | 7.2 | 0.47 | 4.3 | 0.3 | 4.2  | 0.6  | 19.5   | 324.5 | 4.3 | 0.3 |
| Kuskalana-Spot 74   | 141  | 5190  | 1.5 | 24.1914 | 13.2 | 0.0038 | 14.4 | 0.0007 | 5.8 | 0.41 | 4.3 | 0.3 | 3.8  | 0.6  | 266.8  | 335.5 | 4.3 | 0.3 |
| Kuskalana-Spot 68   | 129  | 6482  | 1.1 | 8.1152  | 31.7 | 0.0113 | 32.5 | 0.0007 | 7.4 | 0.23 | 4.3 | 0.3 | 11.4 | 3.7  | 2003.4 | 578.1 | 4.3 | 0.3 |
| Kuskalana-Spot 45   | 160  | 3691  | 0.9 | 12.3508 | 24.4 | 0.0075 | 25.2 | 0.0007 | 6.5 | 0.26 | 4.3 | 0.3 | 7.6  | 1.9  | 1220.6 | 486.7 | 4.3 | 0.3 |
| Kuskalana-Spot 107  | 154  | 1373  | 0.8 | 10.4710 | 26.4 | 0.0091 | 27.2 | 0.0007 | 6.6 | 0.24 | 4.5 | 0.3 | 9.2  | 2.5  | 1538.0 | 504.9 | 4.5 | 0.3 |
| Kuskalana-Spot 66   | 181  | 3152  | 1.0 | 5.1075  | 32.7 | 0.0195 | 33.3 | 0.0007 | 6.5 | 0.19 | 4.6 | 0.3 | 19.6 | 6.5  | 2791.4 | 552.1 | 4.6 | 0.3 |
| Kuskalana-Spot 41   | 182  | 2102  | 1.0 | 5.1977  | 26.7 | 0.0191 | 27.2 | 0.0007 | 5.1 | 0.19 | 4.6 | 0.2 | 19.2 | 5.2  | 2762.7 | 447.5 | 4.6 | 0.2 |
| Kuskalana-Spot 70   | 158  | 2066  | 1.6 | 3.9839  | 12.9 | 0.0263 | 14.3 | 0.0008 | 6.1 | 0.43 | 4.9 | 0.3 | 26.4 | 3.7  | 3191.2 | 204.7 | 4.9 | 0.3 |
| Kuskalana-Spot 42   | 170  | 2837  | 1.1 | 4.1926  | 16.5 | 0.0269 | 17.4 | 0.0008 | 5.7 | 0.33 | 5.3 | 0.3 | 27.0 | 4.6  | 3110.1 | 264.5 | 5.3 | 0.3 |
| Kuskalana-Spot 14   | 132  | 4990  | 1.5 | 2.6233  | 19.4 | 0.0447 | 20.7 | 0.0009 | 7.4 | 0.36 | 5.5 | 0.4 | 44.4 | 9.0  | 3836.5 | 295.8 | 5.5 | 0.4 |
| Kuskalana-Spot 17   | 66   | 2755  | 0.9 | 3.0037  | 36.1 | 0.0402 | 37.2 | 0.0009 | 9.2 | 0.25 | 5.6 | 0.5 | 40.0 | 14.6 | 3630.6 | 575.3 | 5.6 | 0.5 |
| Kuskalana-Spot 13   | 183  | 4491  | 1.3 | 22.0799 | 12.1 | 0.0055 | 12.9 | 0.0009 | 4.5 | 0.35 | 5.7 | 0.3 | 5.6  | 0.7  | 40.0   | 294.6 | 5.7 | 0.3 |
| Kuskalana-Spot 53   | 68   | 22824 | 1.7 | 23.7051 | 12.7 | 0.0066 | 14.1 | 0.0011 | 6.0 | 0.42 | 7.3 | 0.4 | 6.7  | 0.9  | 215.5  | 321.0 | 7.3 | 0.4 |
| Lower White River   |      |       |     |         |      |        |      |        |     |      |     |     |      |      |        |       |     |     |
| LowerWhite-Spot 314 | 1066 | 69269 | 3.1 | 17.3580 | 6.8  | 0.0014 | 7.1  | 0.0002 | 2.2 | 0.31 | 1.1 | 0.0 | 1.4  | 0.1  | 514.0  | 149.5 | 1.1 | 0.0 |
| LowerWhite-Spot 267 | 494  | 1770  | 1.1 | 29.2112 | 10.5 | 0.0054 | 10.7 | 0.0011 | 1.8 | 0.17 | 7.3 | 0.1 | 5.4  | 0.6  | NA     | NA    | 7.3 | 0.1 |
| LowerWhite-Spot 61  | 414  | 5933  | 3.1 | 21.2223 | 4.2  | 0.0075 | 4.8  | 0.0012 | 2.2 | 0.47 | 7.4 | 0.2 | 7.6  | 0.4  | 54.3   | 100.9 | 7.4 | 0.2 |
| LowerWhite-Spot 5   | 2165 | 6561  | 1.2 | 21.8023 | 2.3  | 0.0073 | 2.5  | 0.0012 | 1.1 | 0.44 | 7.4 | 0.1 | 7.4  | 0.2  | NA     | NA    | 7.4 | 0.1 |
| LowerWhite-Spot 302 | 392  | 914   | 3.1 | 28.2383 | 4.6  | 0.0056 | 4.9  | 0.0012 | 1.7 | 0.34 | 7.4 | 0.1 | 5.7  | 0.3  | NA     | NA    | 7.4 | 0.1 |
| LowerWhite-Spot 15  | 449  | 932   | 2.9 | 27.6101 | 7.8  | 0.0058 | 8.1  | 0.0012 | 2.1 | 0.26 | 7.5 | 0.2 | 5.9  | 0.5  | NA     | NA    | 7.5 | 0.2 |
| LowerWhite-Spot 213 | 297  | 3892  | 2.2 | 23.3220 | 4.3  | 0.0069 | 4.6  | 0.0012 | 1.7 | 0.37 | 7.5 | 0.1 | 6.9  | 0.3  | NA     | NA    | 7.5 | 0.1 |
| LowerWhite-Spot 310 | 1605 | 4902  | 2.2 | 22.5168 | 3.0  | 0.0071 | 3.3  | 0.0012 | 1.2 | 0.38 | 7.5 | 0.1 | 7.2  | 0.2  | NA     | NA    | 7.5 | 0.1 |
| LowerWhite-Spot 18  | 856  | 1809  | 3.0 | 24.0396 | 10.5 | 0.0067 | 10.6 | 0.0012 | 1.6 | 0.15 | 7.5 | 0.1 | 6.8  | 0.7  | NA     | NA    | 7.5 | 0.1 |
| LowerWhite-Spot 253 | 597  | 3514  | 3.6 | 24.0020 | 3.6  | 0.0067 | 3.9  | 0.0012 | 1.7 | 0.42 | 7.5 | 0.1 | 6.8  | 0.3  | NA     | NA    | 7.5 | 0.1 |
| LowerWhite-Spot 90  | 1583 | 8278  | 3.1 | 21.5652 | 2.8  | 0.0075 | 3.1  | 0.0012 | 1.5 | 0.47 | 7.6 | 0.1 | 7.6  | 0.2  | 15.9   | 66.3  | 7.6 | 0.1 |
| LowerWhite-Spot 102 | 573  | 41774 | 2.7 | 20.2417 | 3.2  | 0.0080 | 3.6  | 0.0012 | 1.7 | 0.45 | 7.6 | 0.1 | 8.1  | 0.3  | 166.0  | 75.8  | 7.6 | 0.1 |
| LowerWhite-Spot 115 | 2562 | 11591 | 1.4 | 21.2361 | 2.1  | 0.0076 | 2.5  | 0.0012 | 1.5 | 0.58 | 7.6 | 0.1 | 7.7  | 0.2  | 52.7   | 49.0  | 7.6 | 0.1 |
| LowerWhite-Spot 215 | 2813 | 4817  | 1.5 | 21.7778 | 1.8  | 0.0074 | 2.3  | 0.0012 | 1.4 | 0.63 | 7.6 | 0.1 | 7.5  | 0.2  | NA     | NA    | 7.6 | 0.1 |
| LowerWhite-Spot 299 | 245  | 722   | 3.4 | 47.2729 | 13.5 | 0.0034 | 13.7 | 0.0012 | 2.0 | 0.15 | 7.6 | 0.2 | 3.5  | 0.5  | NA     | NA    | 7.6 | 0.2 |
| LowerWhite-Spot 136 | 112  | 3090  | 2.1 | 18.2617 | 8.9  | 0.0089 | 9.4  | 0.0012 | 2.8 | 0.30 | 7.6 | 0.2 | 9.0  | 0.8  | 401.4  | 200.2 | 7.6 | 0.2 |
| LowerWhite-Spot 37  | 878  | 1386  | 2.9 | 26.0533 | 4.5  | 0.0062 | 4.7  | 0.0012 | 1.4 | 0.30 | 7.6 | 0.1 | 6.3  | 0.3  | NA     | NA    | 7.6 | 0.1 |
| LowerWhite-Spot 23  | 446  | 1743  | 2.7 | 23.6552 | 5.2  | 0.0069 | 5.4  | 0.0012 | 1.6 | 0.30 | 7.6 | 0.1 | 6.9  | 0.4  | NA     | NA    | 7.6 | 0.1 |
| LowerWhite-Spot 173 | 6664 | 15183 | 2.5 | 21.7230 | 1.6  | 0.0075 | 2.0  | 0.0012 | 1.2 | 0.62 | 7.6 | 0.1 | 7.6  | 0.1  | NA     | NA    | 7.6 | 0.1 |
| LowerWhite-Spot 186 | 365  | 1087  | 2.8 | 23.6108 | 6.1  | 0.0069 | 6.4  | 0.0012 | 2.0 | 0.31 | 7.6 | 0.2 | 7.0  | 0.4  | NA     | NA    | 7.6 | 0.2 |
| LowerWhite-Spot 25  | 436  | 1583  | 3.2 | 27.6226 | 4.2  | 0.0059 | 4.7  | 0.0012 | 2.1 | 0.45 | 7.6 | 0.2 | 6.0  | 0.3  | NA     | NA    | 7.6 | 0.2 |
| LowerWhite-Spot 214 | 344  | 1438  | 2.5 | 24.0031 | 5.1  | 0.0068 | 5.4  | 0.0012 | 1.9 | 0.35 | 7.6 | 0.1 | 6.9  | 0.4  | NA     | NA    | 7.6 | 0.1 |
| LowerWhite-Spot 79  | 584  | 2815  | 4.0 | 22.9156 | 6.8  | 0.0071 | 7.0  | 0.0012 | 1.5 | 0.22 | 7.6 | 0.1 | 7.2  | 0.5  | NA     | NA    | 7.6 | 0.1 |
| LowerWhite-Spot 57  | 427  | 3106  | 5.0 | 20.2529 | 3.6  | 0.0081 | 4.1  | 0.0012 | 2.0 | 0.49 | 7.6 | 0.2 | 8.2  | 0.3  | 164.7  | 83.8  | 7.6 | 0.2 |
| LowerWhite-Spot 80  | 2370 | 7461  | 2.5 | 21.5101 | 2.9  | 0.0076 | 3.3  | 0.0012 | 1.7 | 0.50 | 7.6 | 0.1 | 7.7  | 0.3  | 22.0   | 69.0  | 7.6 | 0.1 |
| LowerWhite-Spot 289 | 1984 | 4869  | 1.8 | 22.3119 | 3.1  | 0.0073 | 3.4  | 0.0012 | 1.4 | 0.41 | 7.6 | 0.1 | 7.4  | 0.3  | NA     | NA    | 7.6 | 0.1 |
| LowerWhite-Spot 238 | 2497 | 5854  | 2.1 | 21.4884 | 1.8  | 0.0076 | 2.1  | 0.0012 | 1.1 | 0.52 | 7.7 | 0.1 | 7.7  | 0.2  | 24.5   | 42.7  | 7.7 | 0.1 |
| LowerWhite-Spot 32  | 933  | 2634  | 1.6 | 23.6251 | 3.1  | 0.0069 | 3.5  | 0.0012 | 1.5 | 0.43 | 7.7 | 0.1 | 7.0  | 0.2  | NA     | NA    | 7.7 | 0.1 |
| LowerWhite-Spot 223 | 1532 | 5514  | 2.7 | 21.3597 | 2.2  | 0.0077 | 2.6  | 0.0012 | 1.4 | 0.53 | 7.7 | 0.1 | 7.8  | 0.2  | 38.8   | 52.8  | 7.7 | 0.1 |
| LowerWhite-Spot 27  | 1155 | 3043  | 1.3 | 23.3891 | 3.9  | 0.0070 | 4.1  | 0.0012 | 1.2 | 0.30 | 7.7 | 0.1 | 7.1  | 0.3  | NA     | NA    | 7.7 | 0.1 |
| LowerWhite-Spot 243 | 1059 | 2244  | 1.8 | 23.2130 | 3.4  | 0.0071 | 3.6  | 0.0012 | 1.4 | 0.38 | 7.7 | 0.1 | 7.2  | 0.3  | NA     | NA    | 7.7 | 0.1 |
| LowerWhite-Spot 179 | 424  | 1867  | 3.4 | 24.3822 | 5.5  | 0.0068 | 5.8  | 0.0012 | 1.9 | 0.32 | 7.7 | 0.1 | 6.8  | 0.4  | NA     | NA    | 7.7 | 0.1 |
| LowerWhite-Spot 235 | 160  | 606   | 3.3 | 33.3381 | 43.0 | 0.0049 | 43.0 | 0.0012 | 2.3 | 0.05 | 7.7 | 0.2 | 5.0  | 2.1  | NA     | NA    | 7.7 | 0.2 |
| LowerWhite-Spot 10  | 1040 | 2911  | 4.2 | 22.8773 | 3.1  | 0.0072 | 3.4  | 0.0012 | 1.5 | 0.45 | 7.7 | 0.1 | 7.3  | 0.2  | NA     | NA    | 7.7 | 0.1 |
| LowerWhite-Spot 287 | 296  | 1092  | 2.6 | 23.8668 | 6.6  | 0.0070 | 6.8  | 0.0012 | 1.6 | 0.24 | 7.7 | 0.1 | 7.1  | 0.5  | NA     | NA    | 7.7 | 0.1 |
| LowerWhite-Spot 83  | 1619 | 4102  | 1.8 | 23.1196 | 2.7  | 0.0071 | 3.1  | 0.0012 | 1.5 | 0.50 | 7.7 | 0.1 | 7.2  | 0.2  | NA     | NA    | 7.7 | 0.1 |
| LowerWhite-Spot 146 | 1057 | 5227  | 2.0 | 21.8677 | 3.3  | 0.0076 | 3.7  | 0.0012 | 1.6 | 0.43 | 7.7 | 0.1 | 7.7  | 0.3  | 4.5    | 80.7  | 7.7 | 0.1 |
| LowerWhite-Spot 147 | 744  | 2119  | 1.9 | 23.1953 | 3.4  | 0.0071 | 3.8  | 0.0012 | 1.7 | 0.44 | 7.7 | 0.1 | 7.2  | 0.3  | NA     | NA    | 7.7 | 0.1 |
| LowerWhite-Spot 139 | 270  | 1316  | 3.2 | 26.4071 | 5.0  | 0.0063 | 5.4  | 0.0012 | 2.1 | 0.39 | 7.7 | 0.2 | 6.3  | 0.3  | NA     | NA    | 7.7 | 0.2 |
| LowerWhite-Spot 45  | 199  | 1063  | 3.8 | 27.6568 | 20.3 | 0.0060 | 20.4 | 0.0012 | 2.3 | 0.11 | 7.8 | 0.2 | 6.1  | 1.2  | NA     | NA    | 7.8 | 0.2 |
| LowerWhite-Spot 290 | 842  | 1925  | 1.4 | 24.0028 | 3.1  | 0.0069 | 3.5  | 0.0012 | 1.7 | 0.48 | 7.8 | 0.1 | 7.0  | 0.2  | NA     | NA    | 7.8 | 0.1 |
| LowerWhite-Spot 187 | 265  | 1716  | 2.9 | 27.8380 | 4.2  | 0.0060 | 4.6  | 0.0012 | 1.7 | 0.37 | 7.8 | 0.1 | 6.0  | 0.3  | NA     | NA    | 7.8 | 0.1 |
| LowerWhite-Spot 54  | 609  | 1174  | 2.4 | 31.5081 | 16.8 | 0.0053 | 16.9 | 0.0012 | 1.6 | 0.10 | 7.8 | 0.1 | 5.3  | 0.9  | NA     | NA    | 7.8 | 0.1 |
| LowerWhite-Spot 226 | 417  | 1413  | 3.4 | 22.9888 | 4.8  | 0.0072 | 5.1  | 0.0012 | 1.7 |      |     |     |      |      |        |       |     |     |

|                     |      |         |     |         |      |        |      |        |     |      |      |     |      |      |        |       |      |     |
|---------------------|------|---------|-----|---------|------|--------|------|--------|-----|------|------|-----|------|------|--------|-------|------|-----|
| LowerWhite-Spot 252 | 312  | 696     | 2.8 | 34.7953 | 38.2 | 0.0050 | 38.3 | 0.0013 | 2.1 | 0.05 | 8.2  | 0.2 | 5.1  | 1.9  | NA     | NA    | 8.2  | 0.2 |
| LowerWhite-Spot 30  | 120  | 631     | 2.1 | 67.1071 | 33.5 | 0.0026 | 33.6 | 0.0013 | 2.2 | 0.07 | 8.2  | 0.2 | 2.6  | 0.9  | NA     | NA    | 8.2  | 0.2 |
| LowerWhite-Spot 234 | 455  | 1362    | 1.7 | 29.3958 | 4.4  | 0.0060 | 4.7  | 0.0013 | 1.6 | 0.33 | 8.2  | 0.1 | 6.0  | 0.3  | NA     | NA    | 8.2  | 0.1 |
| LowerWhite-Spot 245 | 440  | 862     | 1.6 | 30.2520 | 6.5  | 0.0058 | 6.7  | 0.0013 | 1.6 | 0.23 | 8.2  | 0.1 | 5.9  | 0.4  | NA     | NA    | 8.2  | 0.1 |
| LowerWhite-Spot 297 | 287  | 802     | 2.6 | 45.8541 | 16.2 | 0.0038 | 16.2 | 0.0013 | 1.5 | 0.09 | 8.2  | 0.1 | 3.9  | 0.6  | NA     | NA    | 8.2  | 0.1 |
| LowerWhite-Spot 291 | 546  | 3816    | 2.9 | 24.2506 | 3.0  | 0.0072 | 3.4  | 0.0013 | 1.5 | 0.44 | 8.2  | 0.1 | 7.3  | 0.2  | NA     | NA    | 8.2  | 0.1 |
| LowerWhite-Spot 96  | 241  | 1783    | 2.8 | 23.5515 | 6.3  | 0.0075 | 6.7  | 0.0013 | 2.3 | 0.34 | 8.2  | 0.2 | 7.6  | 0.5  | NA     | NA    | 8.2  | 0.2 |
| LowerWhite-Spot 242 | 362  | 1390    | 2.4 | 22.9320 | 4.1  | 0.0077 | 4.5  | 0.0013 | 1.9 | 0.41 | 8.2  | 0.2 | 7.8  | 0.4  | NA     | NA    | 8.2  | 0.2 |
| LowerWhite-Spot 176 | 1719 | 9137    | 0.8 | 21.5448 | 2.2  | 0.0082 | 2.5  | 0.0013 | 1.2 | 0.47 | 8.3  | 0.1 | 8.3  | 0.2  | 18.2   | 52.7  | 8.3  | 0.1 |
| LowerWhite-Spot 64  | 369  | 794     | 1.8 | 30.7366 | 7.4  | 0.0057 | 7.6  | 0.0013 | 2.0 | 0.26 | 8.3  | 0.2 | 5.8  | 0.4  | NA     | NA    | 8.3  | 0.2 |
| LowerWhite-Spot 133 | 388  | 2035    | 2.0 | 25.1512 | 4.2  | 0.0071 | 4.5  | 0.0013 | 1.8 | 0.40 | 8.3  | 0.1 | 7.1  | 0.3  | NA     | NA    | 8.3  | 0.1 |
| LowerWhite-Spot 22  | 1720 | 7559    | 1.9 | 22.1932 | 2.8  | 0.0081 | 3.2  | 0.0013 | 1.4 | 0.45 | 8.4  | 0.1 | 8.2  | 0.3  | NA     | NA    | 8.4  | 0.1 |
| LowerWhite-Spot 301 | 1920 | 2490    | 1.1 | 23.9718 | 2.0  | 0.0075 | 2.3  | 0.0013 | 1.2 | 0.52 | 8.4  | 0.1 | 7.6  | 0.2  | NA     | NA    | 8.4  | 0.1 |
| LowerWhite-Spot 114 | 483  | 2173    | 1.2 | 23.5247 | 8.6  | 0.0076 | 8.8  | 0.0013 | 1.6 | 0.19 | 8.4  | 0.1 | 7.7  | 0.7  | NA     | NA    | 8.4  | 0.1 |
| LowerWhite-Spot 78  | 359  | 8556    | 1.3 | 20.3908 | 4.6  | 0.0089 | 5.0  | 0.0013 | 1.9 | 0.37 | 8.4  | 0.2 | 9.0  | 0.4  | 148.8  | 107.8 | 8.4  | 0.2 |
| LowerWhite-Spot 28  | 1424 | 5861    | 1.8 | 22.7105 | 2.0  | 0.0080 | 2.4  | 0.0013 | 1.4 | 0.57 | 8.5  | 0.1 | 8.1  | 0.2  | NA     | NA    | 8.5  | 0.1 |
| LowerWhite-Spot 182 | 662  | 6785    | 1.8 | 17.7166 | 6.0  | 0.0102 | 6.3  | 0.0013 | 1.8 | 0.29 | 8.5  | 0.2 | 10.4 | 0.6  | 468.9  | 133.9 | 8.5  | 0.2 |
| LowerWhite-Spot 298 | 364  | 9110    | 2.4 | 21.1504 | 5.2  | 0.0086 | 5.7  | 0.0013 | 2.3 | 0.41 | 8.5  | 0.2 | 8.7  | 0.5  | 62.4   | 123.0 | 8.5  | 0.2 |
| LowerWhite-Spot 274 | 1667 | 2654    | 2.2 | 20.9474 | 2.3  | 0.0088 | 2.7  | 0.0013 | 1.5 | 0.53 | 8.6  | 0.1 | 8.9  | 0.2  | 85.3   | 55.3  | 8.6  | 0.1 |
| LowerWhite-Spot 82  | 2372 | 9925    | 1.5 | 22.1351 | 2.2  | 0.0083 | 2.7  | 0.0013 | 1.6 | 0.58 | 8.6  | 0.1 | 8.4  | 0.2  | NA     | NA    | 8.6  | 0.1 |
| LowerWhite-Spot 270 | 178  | 633     | 2.3 | 38.1474 | 8.2  | 0.0049 | 8.4  | 0.0013 | 1.9 | 0.23 | 8.7  | 0.2 | 4.9  | 0.4  | NA     | NA    | 8.7  | 0.2 |
| LowerWhite-Spot 156 | 217  | 1835    | 4.2 | 20.3183 | 6.9  | 0.0092 | 7.3  | 0.0014 | 2.2 | 0.31 | 8.7  | 0.2 | 9.3  | 0.7  | 157.1  | 161.8 | 8.7  | 0.2 |
| LowerWhite-Spot 313 | 266  | 1146    | 2.6 | 25.3215 | 8.3  | 0.0074 | 8.5  | 0.0014 | 1.7 | 0.20 | 8.7  | 0.2 | 7.5  | 0.6  | NA     | NA    | 8.7  | 0.2 |
| LowerWhite-Spot 52  | 1881 | 6996    | 0.5 | 22.5009 | 1.8  | 0.0084 | 2.2  | 0.0014 | 1.3 | 0.59 | 8.8  | 0.1 | 8.5  | 0.2  | NA     | NA    | 8.8  | 0.1 |
| LowerWhite-Spot 65  | 276  | 1140    | 1.2 | 17.0857 | 8.4  | 0.0112 | 8.6  | 0.0014 | 1.8 | 0.21 | 8.9  | 0.2 | 11.3 | 1.0  | 548.7  | 184.0 | 8.9  | 0.2 |
| LowerWhite-Spot 200 | 1258 | 3787    | 1.7 | 15.5098 | 5.2  | 0.0124 | 5.4  | 0.0014 | 1.7 | 0.31 | 9.0  | 0.1 | 12.6 | 0.7  | 756.3  | 108.9 | 9.0  | 0.1 |
| LowerWhite-Spot 305 | 155  | 736     | 2.1 | 27.0850 | 7.2  | 0.0072 | 7.5  | 0.0014 | 2.0 | 0.27 | 9.1  | 0.2 | 7.2  | 0.5  | NA     | NA    | 9.1  | 0.2 |
| LowerWhite-Spot 105 | 629  | 1051173 | 2.6 | 20.2547 | 3.3  | 0.0096 | 3.7  | 0.0014 | 1.5 | 0.42 | 9.1  | 0.1 | 9.7  | 0.4  | 164.5  | 77.9  | 9.1  | 0.1 |
| LowerWhite-Spot 16  | 146  | 8977    | 2.3 | 20.5544 | 5.2  | 0.0095 | 5.7  | 0.0014 | 2.3 | 0.41 | 9.2  | 0.2 | 9.6  | 0.6  | 130.0  | 123.4 | 9.2  | 0.2 |
| LowerWhite-Spot 196 | 715  | 1317    | 3.1 | 25.1381 | 3.2  | 0.0079 | 3.5  | 0.0014 | 1.4 | 0.40 | 9.2  | 0.1 | 7.9  | 0.3  | NA     | NA    | 9.2  | 0.1 |
| LowerWhite-Spot 277 | 150  | 738     | 2.3 | 53.6206 | 56.2 | 0.0037 | 56.3 | 0.0014 | 2.3 | 0.04 | 9.3  | 0.2 | 3.7  | 2.1  | NA     | NA    | 9.3  | 0.2 |
| LowerWhite-Spot 160 | 400  | 28308   | 2.1 | 18.8975 | 3.6  | 0.0106 | 3.9  | 0.0014 | 1.5 | 0.39 | 9.3  | 0.1 | 10.7 | 0.4  | 324.2  | 81.2  | 9.3  | 0.1 |
| LowerWhite-Spot 260 | 602  | 29224   | 1.3 | 20.3476 | 3.7  | 0.0099 | 4.0  | 0.0015 | 1.5 | 0.38 | 9.4  | 0.1 | 10.0 | 0.4  | 153.8  | 86.7  | 9.4  | 0.1 |
| LowerWhite-Spot 194 | 302  | 755     | 2.7 | 33.4431 | 4.9  | 0.0060 | 5.1  | 0.0015 | 1.6 | 0.31 | 9.4  | 0.1 | 6.1  | 0.3  | NA     | NA    | 9.4  | 0.1 |
| LowerWhite-Spot 127 | 980  | 20634   | 2.9 | 21.1162 | 2.8  | 0.0097 | 3.1  | 0.0015 | 1.2 | 0.40 | 9.6  | 0.1 | 9.8  | 0.3  | 66.3   | 66.6  | 9.6  | 0.1 |
| LowerWhite-Spot 110 | 480  | 2190    | 2.7 | 19.0434 | 4.7  | 0.0108 | 5.0  | 0.0015 | 1.6 | 0.32 | 9.6  | 0.2 | 10.9 | 0.5  | 306.7  | 107.2 | 9.6  | 0.2 |
| LowerWhite-Spot 123 | 778  | 4413    | 3.1 | 12.5847 | 8.2  | 0.0164 | 8.3  | 0.0015 | 1.2 | 0.14 | 9.7  | 0.1 | 16.6 | 1.4  | 1182.8 | 161.9 | 9.7  | 0.1 |
| LowerWhite-Spot 288 | 2480 | 10082   | 0.7 | 21.7058 | 2.5  | 0.0096 | 2.7  | 0.0015 | 1.1 | 0.40 | 9.7  | 0.1 | 9.7  | 0.3  | NA     | NA    | 9.7  | 0.1 |
| LowerWhite-Spot 113 | 1197 | 3799    | 2.9 | 22.2044 | 4.0  | 0.0094 | 4.2  | 0.0015 | 1.2 | 0.28 | 9.7  | 0.1 | 9.5  | 0.4  | NA     | NA    | 9.7  | 0.1 |
| LowerWhite-Spot 77  | 445  | 4169    | 2.1 | 23.2099 | 4.8  | 0.0090 | 5.3  | 0.0015 | 2.3 | 0.44 | 9.8  | 0.2 | 9.1  | 0.5  | NA     | NA    | 9.8  | 0.2 |
| LowerWhite-Spot 19  | 253  | 9668    | 3.8 | 21.2197 | 5.0  | 0.0100 | 5.3  | 0.0015 | 1.7 | 0.33 | 9.9  | 0.2 | 10.1 | 0.5  | 54.6   | 118.5 | 9.9  | 0.2 |
| LowerWhite-Spot 51  | 506  | 2089    | 3.0 | 23.2932 | 3.5  | 0.0091 | 3.7  | 0.0015 | 1.2 | 0.31 | 10.0 | 0.1 | 9.2  | 0.3  | NA     | NA    | 10.0 | 0.1 |
| LowerWhite-Spot 216 | 618  | 2242    | 4.1 | 22.5985 | 4.3  | 0.0095 | 4.6  | 0.0016 | 1.5 | 0.32 | 10.0 | 0.1 | 9.6  | 0.4  | NA     | NA    | 10.0 | 0.1 |
| LowerWhite-Spot 56  | 787  | 2535    | 2.5 | 24.0912 | 3.5  | 0.0089 | 3.8  | 0.0016 | 1.4 | 0.38 | 10.0 | 0.1 | 9.0  | 0.3  | NA     | NA    | 10.0 | 0.1 |
| LowerWhite-Spot 263 | 1690 | 2900    | 5.6 | 22.5334 | 1.9  | 0.0095 | 2.3  | 0.0016 | 1.2 | 0.53 | 10.0 | 0.1 | 9.6  | 0.2  | NA     | NA    | 10.0 | 0.1 |
| LowerWhite-Spot 153 | 3784 | 6921    | 3.2 | 21.7603 | 1.5  | 0.0099 | 1.9  | 0.0016 | 1.1 | 0.58 | 10.1 | 0.1 | 10.0 | 0.2  | NA     | NA    | 10.1 | 0.1 |
| LowerWhite-Spot 33  | 534  | 13676   | 1.6 | 20.1270 | 2.8  | 0.0108 | 3.1  | 0.0016 | 1.5 | 0.47 | 10.1 | 0.1 | 10.9 | 0.3  | 179.2  | 64.3  | 10.1 | 0.1 |
| LowerWhite-Spot 264 | 1069 | 2233    | 2.1 | 24.7186 | 2.6  | 0.0088 | 3.2  | 0.0016 | 1.8 | 0.56 | 10.1 | 0.2 | 8.9  | 0.3  | NA     | NA    | 10.1 | 0.2 |
| LowerWhite-Spot 74  | 305  | 1239    | 4.1 | 24.6171 | 4.1  | 0.0088 | 4.4  | 0.0016 | 1.5 | 0.34 | 10.1 | 0.2 | 8.9  | 0.4  | NA     | NA    | 10.1 | 0.2 |
| LowerWhite-Spot 308 | 1518 | 26299   | 1.9 | 21.7436 | 2.1  | 0.0100 | 2.5  | 0.0016 | 1.4 | 0.55 | 10.2 | 0.1 | 10.1 | 0.3  | NA     | NA    | 10.2 | 0.1 |
| LowerWhite-Spot 124 | 639  | 5602    | 2.4 | 10.7946 | 8.4  | 0.0203 | 8.5  | 0.0016 | 1.6 | 0.18 | 10.2 | 0.2 | 20.4 | 1.7  | 1479.7 | 159.1 | 10.2 | 0.2 |
| LowerWhite-Spot 100 | 131  | 36584   | 3.1 | 5.4885  | 30.6 | 0.0399 | 31.0 | 0.0016 | 4.7 | 0.15 | 10.2 | 0.5 | 39.7 | 12.1 | 2672.2 | 520.8 | 10.2 | 0.5 |
| LowerWhite-Spot 231 | 294  | 1088    | 3.7 | 27.6583 | 4.6  | 0.0079 | 4.8  | 0.0016 | 1.4 | 0.29 | 10.3 | 0.1 | 8.0  | 0.4  | NA     | NA    | 10.3 | 0.1 |
| LowerWhite-Spot 42  | 309  | 7991    | 3.6 | 21.7423 | 4.2  | 0.0101 | 4.6  | 0.0016 | 1.8 | 0.39 | 10.3 | 0.2 | 10.2 | 0.5  | NA     | NA    | 10.3 | 0.2 |
| LowerWhite-Spot 192 | 309  | 1078    | 4.7 | 28.3728 | 16.1 | 0.0078 | 16.1 | 0.0016 | 1.5 | 0.09 | 10.3 | 0.2 | 7.9  | 1.3  | NA     | NA    | 10.3 | 0.2 |
| LowerWhite-Spot 206 | 529  | 1030    | 3.2 | 13.0793 | 6.7  | 0.0172 | 6.8  | 0.0016 | 1.6 | 0.23 | 10.5 | 0.2 | 17.3 | 1.2  | 1106.2 | 133.2 | 10.5 | 0.2 |
| LowerWhite-Spot 198 | 206  | 7890    | 2.7 | 18.2405 | 5.1  | 0.0124 | 5.4  | 0.0016 | 1.7 | 0.32 | 10.6 | 0.2 | 12.5 | 0.7  | 404.0  | 114.2 | 10.6 | 0.2 |
| LowerWhite-Spot 67  | 204  | 1894    | 3.5 | 19.9690 | 5.6  | 0.0113 | 6.0  | 0.0016 | 2.3 | 0.39 | 10.6 | 0.2 | 11.5 | 0.7  | 197.6  | 129.2 | 10.6 | 0.2 |
| LowerWhite-Spot 190 | 209  | 914     | 1.9 | 37.2652 | 14.4 | 0.0061 | 14.5 | 0.0017 | 1.8 | 0.12 | 10.6 | 0.2 | 6.2  | 0.9  | NA     | NA    | 10.6 | 0.2 |
| LowerWhite-Spot 280 | 164  | 1060    | 2.6 | 26.9080 | 7.8  | 0.0085 | 8.1  | 0.0017 | 2.0 | 0.25 | 10.7 | 0.2 | 8.6  | 0.7  | NA     | NA    | 10.7 | 0.2 |
| LowerWhite-Spot 128 | 153  | 937     | 1.7 | 26.2895 | 8.5  | 0.0087 | 9.0  | 0.0017 | 3.0 | 0.33 | 10.7 | 0.3 | 8.8  | 0.8  | NA     | NA    | 10.7 | 0.3 |
| LowerWhite-Spot 241 | 175  | 929     | 2.1 | 24.1786 | 7.5  | 0.0094 | 7.7  | 0.0017 | 1.8 | 0.23 | 10.7 | 0.2 | 9.5  | 0.7  | NA     | NA    | 10.7 | 0.2 |
| LowerWhite-Spot 116 | 125  | 3620    | 3.2 | 12.5305 | 10.2 | 0.0194 | 10.5 | 0.0018 | 2.6 | 0.25 | 11.4 | 0.3 | 19.6 | 2.0  | 1191.3 | 201.2 | 11.4 | 0.3 |
| LowerWhite-Spot 87  | 282  | 8210    | 2.5 | 19.9577 | 4.9  | 0.0122 | 5.2  | 0.0018 | 1.8 | 0.34 | 11.4 | 0.2 | 12.4 | 0.6  | 198.9  | 113.9 | 11.4 | 0.2 |
| LowerWhite-Spot 117 | 2156 | 6731    | 3.6 | 22.6790 | 2.9  | 0.0113 | 3.1  | 0.0019 | 1.1 | 0.34 | 12.0 | 0.1 | 11.4 | 0.4  | NA     | NA    | 12.0 | 0.1 |
| LowerWhite-Spot 258 | 134  | 15277   | 2.3 | 19.7343 | 4.5  | 0.0133 | 5.1  | 0.0019 | 2.5 | 0.48 | 12.2 | 0.3 | 13.4 | 0.7  | 225.0  | 103.0 | 12.2 | 0.3 |
| LowerWhite-Spot 168 | 148  | 1432    | 1.9 | 26.2890 | 14.8 | 0.0115 | 14.9 | 0.0022 | 1.8 | 0.12 | 14.1 | 0.2 | 11.6 | 1.7  | NA     | NA    | 14.1 | 0.2 |
| LowerWhite-Spot 207 | 177  | 2249    | 1.3 | 22.1346 | 4.6  | 0.0146 | 4.9  | 0.0024 | 1.8 | 0.36 | 15.1 | 0.3 | 14.8 | 0.7  | NA     | NA    | 15.1 | 0.3 |
| LowerWhite-Spot 58  | 1701 | 19383   | 1.8 | 21.4622 | 1.6  | 0.0151 | 2.0  | 0.0024 | 1.2 | 0.60 | 15.1 | 0.2 | 15.2 | 0.3  | 27.4   | 38.4  | 15.1 | 0.2 |
| LowerWhite-Spot 232 | 139  | 5245    | 2.3 | 15.3406 | 7.0  | 0.0212 | 7.4  | 0.0024 | 2.2 | 0.30 | 15.2 | 0.3 | 21.3 | 1.6  | 779.4  | 148.0 | 15.2 | 0.3 |
| LowerWhite-Spot 181 | 131  | 1340    | 3.5 | 23.0368 | 9.6  | 0.0141 | 9.8  | 0.0024 | 2.0 | 0.20 | 15.2 | 0.3 | 14.3 | 1.4  | NA     | NA    |      |     |

|                     |      |         |      |         |     |        |     |        |     |      |       |     |       |     |       |      |       |     |
|---------------------|------|---------|------|---------|-----|--------|-----|--------|-----|------|-------|-----|-------|-----|-------|------|-------|-----|
| LowerWhite-Spot 312 | 272  | 227403  | 3.6  | 21.6947 | 2.3 | 0.0587 | 3.6 | 0.0092 | 2.8 | 0.78 | 59.3  | 1.6 | 57.9  | 2.0 | 1.5   | 54.4 | 59.3  | 1.6 |
| LowerWhite-Spot 188 | 229  | 3714    | 2.7  | 22.2667 | 4.1 | 0.0578 | 4.3 | 0.0093 | 1.2 | 0.28 | 59.9  | 0.7 | 57.1  | 2.4 | NA    | NA   | 59.9  | 0.7 |
| LowerWhite-Spot 144 | 693  | 35232   | 4.4  | 21.6403 | 1.2 | 0.0600 | 1.9 | 0.0094 | 1.5 | 0.79 | 60.4  | 0.9 | 59.2  | 1.1 | 7.6   | 28.4 | 60.4  | 0.9 |
| LowerWhite-Spot 1   | 280  | 2865    | 3.9  | 23.7700 | 1.7 | 0.0594 | 2.1 | 0.0102 | 1.2 | 0.58 | 65.7  | 0.8 | 58.6  | 1.2 | NA    | NA   | 65.7  | 0.8 |
| LowerWhite-Spot 9   | 461  | 20095   | 3.3  | 21.5180 | 1.0 | 0.0657 | 1.6 | 0.0103 | 1.2 | 0.78 | 65.8  | 0.8 | 64.6  | 1.0 | 21.2  | 24.2 | 65.8  | 0.8 |
| LowerWhite-Spot 103 | 358  | 5704    | 4.8  | 21.5096 | 1.6 | 0.0723 | 2.0 | 0.0113 | 1.2 | 0.60 | 72.3  | 0.9 | 70.8  | 1.4 | 22.1  | 38.9 | 72.3  | 0.9 |
| LowerWhite-Spot 6   | 285  | 22539   | 4.1  | 20.8877 | 1.8 | 0.0751 | 2.3 | 0.0114 | 1.4 | 0.63 | 73.0  | 1.0 | 73.5  | 1.6 | 92.1  | 42.7 | 73.0  | 1.0 |
| LowerWhite-Spot 225 | 422  | 12209   | 4.0  | 20.7494 | 1.3 | 0.0790 | 1.9 | 0.0119 | 1.4 | 0.73 | 76.2  | 1.0 | 77.2  | 1.4 | 107.8 | 30.6 | 76.2  | 1.0 |
| LowerWhite-Spot 184 | 105  | 4879    | 1.3  | 22.2022 | 2.7 | 0.0778 | 3.0 | 0.0125 | 1.3 | 0.43 | 80.3  | 1.0 | 76.1  | 2.2 | NA    | NA   | 80.3  | 1.0 |
| LowerWhite-Spot 111 | 117  | 4710    | 2.2  | 21.7070 | 2.8 | 0.0902 | 3.1 | 0.0142 | 1.2 | 0.38 | 90.9  | 1.1 | 87.7  | 2.6 | NA    | NA   | 90.9  | 1.1 |
| LowerWhite-Spot 59  | 272  | 28029   | 2.1  | 20.3677 | 1.2 | 0.0540 | 1.6 | 0.0228 | 1.1 | 0.66 | 145.1 | 1.5 | 145.4 | 2.2 | 151.5 | 28.3 | 145.1 | 1.5 |
| LowerWhite-Spot 304 | 567  | 27076   | 11.0 | 20.6793 | 1.2 | 0.1520 | 1.8 | 0.0228 | 1.4 | 0.76 | 145.3 | 2.0 | 143.6 | 2.4 | 115.7 | 27.7 | 145.3 | 2.0 |
| LowerWhite-Spot 219 | 594  | 24376   | 7.3  | 20.6227 | 1.0 | 0.1569 | 1.8 | 0.0235 | 1.5 | 0.85 | 149.6 | 2.3 | 148.0 | 2.5 | 122.2 | 22.4 | 149.6 | 2.3 |
| LowerWhite-Spot 165 | 205  | 293652  | 3.3  | 20.7158 | 1.8 | 0.1571 | 2.2 | 0.0236 | 1.2 | 0.55 | 150.4 | 1.8 | 148.1 | 3.0 | 111.6 | 43.4 | 150.4 | 1.8 |
| LowerWhite-Spot 193 | 277  | 9112    | 3.9  | 19.6401 | 1.2 | 0.2160 | 1.8 | 0.0308 | 1.3 | 0.72 | 195.4 | 2.4 | 198.5 | 3.2 | 236.0 | 28.2 | 195.4 | 2.4 |
| LowerWhite-Spot 4   | 1580 | 83460   | 3.9  | 18.4970 | 0.8 | 0.2412 | 1.7 | 0.0324 | 1.5 | 0.87 | 205.3 | 3.0 | 219.4 | 3.4 | 372.7 | 19.1 | 205.3 | 3.0 |
| LowerWhite-Spot 279 | 598  | 310035  | 1.6  | 18.7881 | 0.7 | 0.3184 | 2.7 | 0.0434 | 2.6 | 0.96 | 273.9 | 6.9 | 280.7 | 6.6 | 337.4 | 16.6 | 273.9 | 6.9 |
| LowerWhite-Spot 14  | 3989 | 520100  | 3.1  | 18.7546 | 0.8 | 0.3215 | 1.7 | 0.0438 | 1.5 | 0.87 | 276.0 | 3.9 | 283.1 | 4.1 | 341.5 | 18.6 | 276.0 | 3.9 |
| LowerWhite-Spot 295 | 1987 | 81380   | 2.0  | 18.8457 | 0.7 | 0.3212 | 1.5 | 0.0439 | 1.3 | 0.89 | 277.1 | 3.6 | 282.8 | 3.7 | 330.5 | 15.8 | 277.1 | 3.6 |
| LowerWhite-Spot 140 | 2801 | 359522  | 4.5  | 19.0071 | 0.6 | 0.3215 | 1.5 | 0.0443 | 1.3 | 0.92 | 279.7 | 3.7 | 283.0 | 3.6 | 311.1 | 13.1 | 279.7 | 3.7 |
| LowerWhite-Spot 224 | 722  | 76642   | 1.8  | 19.0179 | 0.8 | 0.3215 | 1.4 | 0.0444 | 1.2 | 0.83 | 279.8 | 3.2 | 283.1 | 3.5 | 309.8 | 17.9 | 279.8 | 3.2 |
| LowerWhite-Spot 84  | 381  | 60287   | 3.6  | 19.2729 | 1.0 | 0.3218 | 1.4 | 0.0450 | 1.1 | 0.74 | 283.7 | 2.9 | 283.3 | 3.5 | 279.4 | 21.8 | 283.7 | 2.9 |
| LowerWhite-Spot 76  | 1261 | 73942   | 3.0  | 19.0813 | 0.8 | 0.3254 | 1.6 | 0.0451 | 1.4 | 0.86 | 284.1 | 3.8 | 286.1 | 4.0 | 302.2 | 18.6 | 284.1 | 3.8 |
| LowerWhite-Spot 145 | 450  | 102931  | 4.6  | 18.9260 | 0.7 | 0.3316 | 1.5 | 0.0455 | 1.3 | 0.89 | 287.1 | 3.8 | 290.8 | 3.8 | 320.9 | 15.6 | 287.1 | 3.8 |
| LowerWhite-Spot 157 | 1113 | 92103   | 5.3  | 18.9159 | 0.9 | 0.3332 | 1.5 | 0.0457 | 1.1 | 0.79 | 288.3 | 3.2 | 292.0 | 3.7 | 322.1 | 20.3 | 288.3 | 3.2 |
| LowerWhite-Spot 202 | 851  | 116040  | 3.8  | 18.9856 | 0.8 | 0.3357 | 1.7 | 0.0462 | 1.5 | 0.87 | 291.4 | 4.3 | 293.9 | 4.4 | 313.7 | 19.1 | 291.4 | 4.3 |
| LowerWhite-Spot 239 | 648  | 81476   | 1.6  | 19.0454 | 0.7 | 0.3357 | 1.5 | 0.0464 | 1.3 | 0.87 | 292.3 | 3.7 | 293.9 | 3.8 | 306.5 | 16.5 | 292.3 | 3.7 |
| LowerWhite-Spot 217 | 866  | 94268   | 4.7  | 19.0073 | 0.8 | 0.3368 | 1.6 | 0.0465 | 1.4 | 0.87 | 292.7 | 4.0 | 294.8 | 4.1 | 311.1 | 18.3 | 292.7 | 4.0 |
| LowerWhite-Spot 109 | 2576 | 651616  | 4.2  | 19.0044 | 0.6 | 0.3370 | 1.3 | 0.0465 | 1.1 | 0.86 | 292.8 | 3.1 | 294.9 | 3.2 | 311.4 | 14.5 | 292.8 | 3.1 |
| LowerWhite-Spot 99  | 354  | 100542  | 2.6  | 18.8197 | 1.2 | 0.3406 | 1.8 | 0.0465 | 1.3 | 0.75 | 293.1 | 3.8 | 297.6 | 4.6 | 333.6 | 27.1 | 293.1 | 3.8 |
| LowerWhite-Spot 161 | 309  | 60799   | 3.7  | 19.0462 | 0.8 | 0.3368 | 1.3 | 0.0465 | 1.0 | 0.75 | 293.2 | 2.7 | 294.7 | 3.3 | 306.4 | 19.1 | 293.2 | 2.7 |
| LowerWhite-Spot 218 | 330  | 319854  | 1.7  | 18.8134 | 1.0 | 0.3413 | 1.6 | 0.0466 | 1.3 | 0.79 | 293.6 | 3.6 | 298.2 | 4.1 | 334.4 | 21.6 | 293.6 | 3.6 |
| LowerWhite-Spot 0   | 416  | 93395   | 3.3  | 18.8577 | 0.7 | 0.3407 | 2.0 | 0.0466 | 1.9 | 0.94 | 293.7 | 5.4 | 297.7 | 5.2 | 329.0 | 15.3 | 293.7 | 5.4 |
| LowerWhite-Spot 311 | 685  | 59306   | 2.8  | 19.3200 | 0.8 | 0.3335 | 1.7 | 0.0468 | 1.5 | 0.88 | 294.6 | 4.4 | 292.3 | 4.4 | 273.8 | 18.6 | 294.6 | 4.4 |
| LowerWhite-Spot 261 | 476  | 226885  | 3.6  | 19.1783 | 0.9 | 0.3370 | 1.6 | 0.0469 | 1.3 | 0.81 | 295.4 | 3.7 | 294.9 | 4.0 | 290.6 | 21.1 | 295.4 | 3.7 |
| LowerWhite-Spot 275 | 1384 | 70737   | 3.5  | 19.0774 | 0.7 | 0.3388 | 1.4 | 0.0469 | 1.3 | 0.87 | 295.4 | 3.6 | 296.2 | 3.7 | 302.7 | 15.9 | 295.4 | 3.6 |
| LowerWhite-Spot 220 | 733  | 86556   | 3.0  | 18.9957 | 0.9 | 0.3405 | 1.7 | 0.0469 | 1.4 | 0.84 | 295.7 | 4.1 | 297.6 | 4.3 | 312.5 | 20.7 | 295.7 | 4.1 |
| LowerWhite-Spot 272 | 725  | 34347   | 2.5  | 19.0706 | 0.9 | 0.3392 | 1.7 | 0.0469 | 1.4 | 0.85 | 295.7 | 4.2 | 296.6 | 4.3 | 303.5 | 20.0 | 295.7 | 4.2 |
| LowerWhite-Spot 97  | 1445 | 906125  | 2.9  | 19.0948 | 0.8 | 0.3388 | 1.6 | 0.0469 | 1.4 | 0.86 | 295.7 | 4.0 | 296.3 | 4.2 | 300.6 | 18.6 | 295.7 | 4.0 |
| LowerWhite-Spot 250 | 516  | 43057   | 3.5  | 18.7880 | 1.1 | 0.3444 | 1.6 | 0.0469 | 1.2 | 0.75 | 295.7 | 3.5 | 300.5 | 4.2 | 337.4 | 24.2 | 295.7 | 3.5 |
| LowerWhite-Spot 104 | 1828 | 107888  | 2.3  | 19.2048 | 0.7 | 0.3371 | 1.5 | 0.0470 | 1.3 | 0.87 | 295.9 | 3.8 | 295.0 | 3.8 | 287.5 | 16.5 | 295.9 | 3.8 |
| LowerWhite-Spot 309 | 700  | 45645   | 3.2  | 19.1990 | 1.0 | 0.3377 | 1.7 | 0.0470 | 1.4 | 0.81 | 296.3 | 4.0 | 295.4 | 4.3 | 288.2 | 22.5 | 296.3 | 4.0 |
| LowerWhite-Spot 237 | 376  | 19361   | 3.2  | 18.8656 | 1.1 | 0.3440 | 1.5 | 0.0471 | 0.9 | 0.64 | 296.6 | 2.7 | 300.2 | 3.8 | 328.1 | 25.7 | 296.6 | 2.7 |
| LowerWhite-Spot 203 | 767  | 102101  | 3.5  | 18.9751 | 0.9 | 0.3423 | 1.6 | 0.0471 | 1.3 | 0.81 | 296.8 | 3.7 | 298.9 | 4.1 | 314.9 | 21.4 | 296.8 | 3.7 |
| LowerWhite-Spot 112 | 175  | 34709   | 2.3  | 19.1396 | 1.0 | 0.3395 | 1.5 | 0.0472 | 1.0 | 0.71 | 297.0 | 3.0 | 296.8 | 3.8 | 295.3 | 23.7 | 297.0 | 3.0 |
| LowerWhite-Spot 208 | 1426 | 2367210 | 2.6  | 19.1252 | 1.0 | 0.3398 | 1.7 | 0.0472 | 1.4 | 0.80 | 297.0 | 4.0 | 297.0 | 4.4 | 297.0 | 23.3 | 297.0 | 4.0 |
| LowerWhite-Spot 222 | 253  | 21278   | 4.5  | 18.8935 | 1.1 | 0.3442 | 1.5 | 0.0472 | 1.0 | 0.66 | 297.2 | 2.9 | 300.3 | 3.9 | 324.7 | 26.0 | 297.2 | 2.9 |
| LowerWhite-Spot 12  | 967  | 102984  | 3.0  | 19.0124 | 0.8 | 0.3426 | 1.5 | 0.0473 | 1.2 | 0.82 | 297.7 | 3.5 | 299.1 | 3.8 | 310.5 | 18.9 | 297.7 | 3.5 |
| LowerWhite-Spot 94  | 579  | 119923  | 2.7  | 18.9996 | 0.9 | 0.3428 | 1.5 | 0.0473 | 1.2 | 0.81 | 297.7 | 3.6 | 299.3 | 4.0 | 312.0 | 20.8 | 297.7 | 3.6 |
| LowerWhite-Spot 48  | 285  | 90664   | 4.3  | 18.6731 | 1.1 | 0.3492 | 1.5 | 0.0473 | 1.0 | 0.67 | 298.0 | 3.0 | 304.1 | 4.0 | 351.3 | 25.7 | 298.0 | 3.0 |
| LowerWhite-Spot 276 | 255  | 29637   | 3.2  | 18.8682 | 1.2 | 0.3459 | 1.5 | 0.0474 | 0.9 | 0.60 | 298.3 | 2.7 | 301.6 | 4.0 | 327.8 | 27.5 | 298.3 | 2.7 |
| LowerWhite-Spot 257 | 2666 | 146957  | 3.0  | 19.1223 | 0.9 | 0.3414 | 1.9 | 0.0474 | 1.7 | 0.89 | 298.4 | 5.0 | 298.2 | 5.0 | 297.3 | 20.2 | 298.4 | 5.0 |
| LowerWhite-Spot 249 | 855  | 104925  | 2.7  | 19.0995 | 0.7 | 0.3419 | 1.5 | 0.0474 | 1.3 | 0.88 | 298.4 | 3.9 | 298.6 | 4.0 | 300.1 | 16.8 | 298.4 | 3.9 |
| LowerWhite-Spot 149 | 765  | 118604  | 2.7  | 19.0517 | 0.9 | 0.3430 | 1.8 | 0.0474 | 1.6 | 0.87 | 298.6 | 4.6 | 299.5 | 4.7 | 305.8 | 20.2 | 298.6 | 4.6 |
| LowerWhite-Spot 273 | 1724 | 101754  | 4.9  | 18.6591 | 0.6 | 0.3505 | 1.4 | 0.0475 | 1.2 | 0.89 | 298.9 | 3.6 | 305.1 | 3.7 | 353.0 | 14.7 | 298.9 | 3.6 |
| LowerWhite-Spot 303 | 695  | 92303   | 1.7  | 19.0616 | 0.6 | 0.3431 | 1.1 | 0.0475 | 1.0 | 0.83 | 298.9 | 2.8 | 299.5 | 3.0 | 304.6 | 14.6 | 298.9 | 2.8 |
| LowerWhite-Spot 199 | 1482 | 131686  | 2.0  | 19.1131 | 0.8 | 0.3422 | 1.3 | 0.0475 | 1.1 | 0.79 | 298.9 | 3.1 | 298.8 | 3.5 | 298.4 | 18.6 | 298.9 | 3.1 |
| LowerWhite-Spot 236 | 728  | 119609  | 2.5  | 18.7741 | 1.0 | 0.3484 | 1.6 | 0.0475 | 1.2 | 0.79 | 298.9 | 3.6 | 303.6 | 4.1 | 339.1 | 21.6 | 298.9 | 3.6 |
| LowerWhite-Spot 134 | 426  | 49334   | 2.8  | 19.0544 | 0.8 | 0.3435 | 1.9 | 0.0475 | 1.7 | 0.90 | 299.1 | 4.9 | 299.8 | 4.9 | 305.4 | 19.0 | 299.1 | 4.9 |
| LowerWhite-Spot 281 | 802  | 177536  | 2.6  | 18.8779 | 1.0 | 0.3467 | 1.6 | 0.0475 | 1.3 | 0.78 | 299.1 | 3.7 | 302.3 | 4.2 | 326.6 | 22.8 | 299.1 | 3.7 |
| LowerWhite-Spot 151 | 212  | 400255  | 3.2  | 18.8622 | 1.1 | 0.3471 | 1.6 | 0.0475 | 1.2 | 0.74 | 299.1 | 3.4 | 302.5 | 4.1 | 328.5 | 24.0 | 299.1 | 3.4 |
| LowerWhite-Spot 233 | 1391 | 209303  | 2.8  | 18.9696 | 0.7 | 0.3451 | 1.5 | 0.0475 | 1.3 | 0.88 | 299.2 | 3.9 | 301.0 | 3.9 | 315.6 | 16.4 | 299.2 | 3.9 |
| LowerWhite-Spot 265 | 1650 | 141764  | 3.3  | 18.9829 | 0.7 | 0.3451 | 1.4 | 0.0475 | 1.2 | 0.87 | 299.3 | 3.6 | 301.0 | 3.7 | 314.0 | 15.8 | 299.3 | 3.6 |
| LowerWhite-Spot 205 | 530  | 7069625 | 1.9  | 18.8775 | 0.9 | 0.3472 | 1.7 | 0.0476 | 1.5 | 0.86 | 299.5 | 4.4 | 302.6 | 4.6 | 326.7 | 20.4 | 299.5 | 4.4 |
| LowerWhite-Spot 185 | 1719 | 107146  | 2.6  | 18.9110 | 0.6 | 0.3467 | 1.3 | 0.0476 | 1.1 | 0.88 | 299.6 | 3.3 | 302.2 | 3.3 | 322.7 | 13.7 | 299.6 | 3.3 |
| LowerWhite-Spot 255 | 670  | 95515   | 2.7  | 19.1077 | 0.8 | 0.3433 | 1.5 | 0.0476 | 1.3 | 0.85 | 299.7 | 3.7 | 299.6 | 3.8 | 299.1 | 17.9 | 299.7 | 3.7 |
| LowerWhite-Spot 172 | 526  | 27818   | 2.7  | 19.1184 | 0.8 | 0.3431 | 1.5 | 0.0476 | 1.3 | 0.83 | 299.8 | 3.7 | 299.6 | 3.9 | 297.8 | 19.3 | 299.8 | 3.7 |
| LowerWhite-Spot 154 | 1375 | 145779  | 3.2  | 18.9431 | 0.6 | 0.3465 | 1.6 | 0.0476 | 1.5 | 0.92 | 300.0 | 4.5 | 302.1 |     |       |      |       |     |

|                     |      |          |      |         |      |        |      |        |     |      |       |     |       |      |        |       |       |     |
|---------------------|------|----------|------|---------|------|--------|------|--------|-----|------|-------|-----|-------|------|--------|-------|-------|-----|
| LowerWhite-Spot 251 | 1154 | 224249   | 9.3  | 18.9541 | 0.6  | 0.3477 | 1.3  | 0.0478 | 1.1 | 0.86 | 301.1 | 3.3 | 303.0 | 3.4  | 317.4  | 14.8  | 301.1 | 3.3 |
| LowerWhite-Spot 106 | 1078 | 90137    | 3.0  | 18.8106 | 0.7  | 0.3504 | 1.5  | 0.0478 | 1.3 | 0.86 | 301.2 | 3.7 | 305.0 | 3.8  | 334.7  | 16.9  | 301.2 | 3.7 |
| LowerWhite-Spot 141 | 1405 | 136704   | 4.2  | 19.0715 | 0.8  | 0.3457 | 1.3  | 0.0478 | 1.1 | 0.82 | 301.3 | 3.2 | 301.5 | 3.5  | 303.4  | 17.4  | 301.3 | 3.2 |
| LowerWhite-Spot 307 | 576  | 5351663  | 3.0  | 19.0282 | 0.9  | 0.3465 | 1.7  | 0.0478 | 1.5 | 0.86 | 301.3 | 4.4 | 302.1 | 4.5  | 308.6  | 20.2  | 301.3 | 4.4 |
| LowerWhite-Spot 155 | 1694 | 91328    | 2.6  | 18.8504 | 0.8  | 0.3498 | 1.5  | 0.0478 | 1.3 | 0.87 | 301.3 | 4.0 | 304.6 | 4.1  | 329.9  | 17.4  | 301.3 | 4.0 |
| LowerWhite-Spot 75  | 427  | 36622    | 2.5  | 19.2558 | 1.1  | 0.3430 | 1.8  | 0.0479 | 1.4 | 0.78 | 301.7 | 4.2 | 299.4 | 4.7  | 281.5  | 25.7  | 301.7 | 4.2 |
| LowerWhite-Spot 86  | 1255 | 93450    | 4.2  | 19.1576 | 0.7  | 0.3449 | 1.4  | 0.0479 | 1.2 | 0.87 | 301.9 | 3.5 | 300.9 | 3.6  | 293.1  | 15.4  | 301.9 | 3.5 |
| LowerWhite-Spot 191 | 538  | 145314   | 2.9  | 19.3362 | 1.0  | 0.3418 | 1.7  | 0.0480 | 1.4 | 0.83 | 302.0 | 4.2 | 298.6 | 4.4  | 271.9  | 22.0  | 302.0 | 4.2 |
| LowerWhite-Spot 211 | 681  | 77553    | 7.1  | 19.1888 | 0.9  | 0.3445 | 1.6  | 0.0480 | 1.3 | 0.81 | 302.0 | 3.7 | 300.6 | 4.1  | 289.4  | 20.9  | 302.0 | 3.7 |
| LowerWhite-Spot 135 | 383  | 99724    | 3.3  | 19.2156 | 0.9  | 0.3441 | 1.7  | 0.0480 | 1.4 | 0.82 | 302.1 | 4.0 | 300.3 | 4.3  | 286.2  | 21.4  | 302.1 | 4.0 |
| LowerWhite-Spot 49  | 751  | 48998    | 3.0  | 19.2288 | 0.9  | 0.3440 | 1.5  | 0.0480 | 1.2 | 0.78 | 302.2 | 3.5 | 300.2 | 4.0  | 284.7  | 21.6  | 302.2 | 3.5 |
| LowerWhite-Spot 40  | 617  | 198427   | 2.8  | 18.8095 | 0.5  | 0.3521 | 1.3  | 0.0481 | 1.2 | 0.91 | 302.6 | 3.6 | 306.3 | 3.5  | 334.8  | 12.4  | 302.6 | 3.6 |
| LowerWhite-Spot 118 | 440  | 28599    | 4.1  | 19.1199 | 1.0  | 0.3466 | 1.7  | 0.0481 | 1.4 | 0.82 | 302.7 | 4.1 | 302.2 | 4.5  | 297.6  | 22.6  | 302.7 | 4.1 |
| LowerWhite-Spot 43  | 460  | 93214    | 2.7  | 19.3169 | 0.7  | 0.3433 | 1.3  | 0.0481 | 1.0 | 0.82 | 302.9 | 3.0 | 299.7 | 3.3  | 274.2  | 16.4  | 302.9 | 3.0 |
| LowerWhite-Spot 69  | 604  | 103737   | 2.2  | 19.1267 | 0.8  | 0.3469 | 1.4  | 0.0481 | 1.2 | 0.83 | 303.1 | 3.5 | 302.4 | 3.7  | 296.8  | 17.6  | 303.1 | 3.5 |
| LowerWhite-Spot 221 | 297  | 29586    | 0.8  | 16.1611 | 3.5  | 0.4106 | 3.7  | 0.0481 | 1.4 | 0.36 | 303.2 | 4.0 | 349.3 | 11.0 | 668.9  | 74.5  | 303.2 | 4.0 |
| LowerWhite-Spot 278 | 91   | 19030    | 3.9  | 19.1954 | 1.5  | 0.3458 | 1.9  | 0.0482 | 1.1 | 0.59 | 303.2 | 3.3 | 301.6 | 5.0  | 288.6  | 35.0  | 303.2 | 3.3 |
| LowerWhite-Spot 138 | 824  | 71821    | 2.9  | 19.1951 | 0.7  | 0.3459 | 1.5  | 0.0482 | 1.3 | 0.89 | 303.3 | 4.0 | 301.7 | 4.0  | 288.7  | 15.8  | 303.3 | 4.0 |
| LowerWhite-Spot 92  | 1283 | 247210   | 5.2  | 19.0328 | 0.6  | 0.3490 | 1.3  | 0.0482 | 1.2 | 0.89 | 303.4 | 3.5 | 304.0 | 3.5  | 308.1  | 13.8  | 303.4 | 3.5 |
| LowerWhite-Spot 137 | 680  | 202293   | 3.6  | 18.9121 | 0.8  | 0.3512 | 1.5  | 0.0482 | 1.3 | 0.86 | 303.4 | 3.8 | 305.6 | 3.9  | 322.5  | 17.0  | 303.4 | 3.8 |
| LowerWhite-Spot 17  | 566  | 90562    | 5.1  | 18.7295 | 0.8  | 0.3546 | 1.4  | 0.0482 | 1.2 | 0.83 | 303.4 | 3.5 | 308.2 | 3.8  | 344.5  | 18.2  | 303.4 | 3.5 |
| LowerWhite-Spot 283 | 527  | 41219    | 2.9  | 19.2457 | 0.9  | 0.3453 | 1.7  | 0.0482 | 1.4 | 0.84 | 303.6 | 4.2 | 301.2 | 4.4  | 282.7  | 21.0  | 303.6 | 4.2 |
| LowerWhite-Spot 85  | 476  | 188529   | 4.6  | 19.1185 | 0.7  | 0.3477 | 1.6  | 0.0482 | 1.4 | 0.88 | 303.7 | 4.1 | 303.0 | 4.1  | 297.8  | 16.8  | 303.7 | 4.1 |
| LowerWhite-Spot 71  | 368  | 91795    | 2.6  | 19.1672 | 0.9  | 0.3470 | 1.6  | 0.0483 | 1.3 | 0.84 | 303.8 | 3.9 | 302.4 | 4.1  | 292.0  | 19.8  | 303.8 | 3.9 |
| LowerWhite-Spot 177 | 581  | 100534   | 3.7  | 19.3036 | 0.9  | 0.3447 | 1.7  | 0.0483 | 1.4 | 0.85 | 304.0 | 4.3 | 300.7 | 4.4  | 275.7  | 20.6  | 304.0 | 4.3 |
| LowerWhite-Spot 119 | 714  | 154197   | 13.2 | 19.2050 | 0.9  | 0.3465 | 1.7  | 0.0483 | 1.4 | 0.85 | 304.0 | 4.2 | 302.1 | 4.3  | 287.5  | 19.9  | 304.0 | 4.2 |
| LowerWhite-Spot 34  | 716  | 222218   | 2.6  | 18.9887 | 0.7  | 0.3505 | 1.2  | 0.0483 | 1.0 | 0.82 | 304.0 | 3.0 | 305.1 | 3.3  | 313.3  | 16.3  | 304.0 | 3.0 |
| LowerWhite-Spot 39  | 3470 | 688513   | 3.4  | 19.1086 | 0.9  | 0.3486 | 1.5  | 0.0483 | 1.3 | 0.83 | 304.3 | 3.8 | 303.7 | 4.0  | 298.9  | 19.8  | 304.3 | 3.8 |
| LowerWhite-Spot 282 | 1097 | 105031   | 3.8  | 18.7566 | 1.0  | 0.3553 | 1.7  | 0.0484 | 1.4 | 0.80 | 304.4 | 4.1 | 308.7 | 4.5  | 341.2  | 22.9  | 304.4 | 4.1 |
| LowerWhite-Spot 132 | 1011 | 92695    | 3.6  | 19.0123 | 0.6  | 0.3505 | 1.5  | 0.0484 | 1.4 | 0.90 | 304.4 | 4.1 | 305.1 | 4.0  | 310.5  | 14.6  | 304.4 | 4.1 |
| LowerWhite-Spot 256 | 3470 | 466417   | 2.1  | 18.9862 | 0.7  | 0.3512 | 1.4  | 0.0484 | 1.3 | 0.88 | 304.6 | 3.8 | 305.6 | 3.8  | 313.6  | 15.5  | 304.6 | 3.8 |
| LowerWhite-Spot 201 | 411  | 60503    | 2.1  | 19.2547 | 1.0  | 0.3464 | 1.7  | 0.0484 | 1.4 | 0.83 | 304.6 | 4.3 | 302.0 | 4.5  | 281.6  | 22.0  | 304.6 | 4.3 |
| LowerWhite-Spot 174 | 1258 | 266846   | 2.8  | 19.0749 | 0.7  | 0.3497 | 1.7  | 0.0484 | 1.5 | 0.91 | 304.7 | 4.5 | 304.5 | 4.4  | 303.0  | 15.9  | 304.7 | 4.5 |
| LowerWhite-Spot 129 | 610  | 98329    | 3.3  | 18.9746 | 0.9  | 0.3516 | 1.7  | 0.0484 | 1.4 | 0.85 | 304.7 | 4.3 | 305.9 | 4.5  | 315.0  | 20.1  | 304.7 | 4.3 |
| LowerWhite-Spot 121 | 884  | 104132   | 1.6  | 19.1468 | 0.8  | 0.3488 | 1.4  | 0.0485 | 1.2 | 0.84 | 305.0 | 3.6 | 303.8 | 3.7  | 294.4  | 17.7  | 305.0 | 3.6 |
| LowerWhite-Spot 262 | 2381 | 22779274 | 5.1  | 19.1307 | 0.6  | 0.3492 | 1.2  | 0.0485 | 1.1 | 0.86 | 305.1 | 3.2 | 304.1 | 3.3  | 296.3  | 14.4  | 305.1 | 3.2 |
| LowerWhite-Spot 20  | 1486 | 553989   | 2.6  | 18.9238 | 0.6  | 0.3530 | 1.2  | 0.0485 | 1.0 | 0.87 | 305.1 | 3.1 | 307.0 | 3.2  | 321.1  | 13.4  | 305.1 | 3.1 |
| LowerWhite-Spot 292 | 1069 | 239267   | 3.2  | 18.9714 | 0.8  | 0.3526 | 1.3  | 0.0485 | 1.0 | 0.79 | 305.6 | 3.1 | 306.7 | 3.5  | 315.4  | 18.1  | 305.6 | 3.1 |
| LowerWhite-Spot 148 | 840  | 54965    | 2.5  | 19.2278 | 0.7  | 0.3482 | 1.7  | 0.0486 | 1.5 | 0.89 | 305.8 | 4.4 | 303.4 | 4.3  | 284.8  | 16.9  | 305.8 | 4.4 |
| LowerWhite-Spot 95  | 441  | 57987    | 8.2  | 19.1778 | 0.8  | 0.3492 | 1.4  | 0.0486 | 1.1 | 0.81 | 305.9 | 3.4 | 304.1 | 3.7  | 290.7  | 19.0  | 305.9 | 3.4 |
| LowerWhite-Spot 230 | 363  | 98565    | 2.8  | 19.1565 | 0.9  | 0.3496 | 1.5  | 0.0486 | 1.2 | 0.78 | 305.9 | 3.5 | 304.4 | 3.9  | 293.2  | 21.6  | 305.9 | 3.5 |
| LowerWhite-Spot 35  | 1294 | 107039   | 2.2  | 19.2601 | 0.9  | 0.3482 | 1.6  | 0.0487 | 1.3 | 0.82 | 306.3 | 4.0 | 303.4 | 4.3  | 280.9  | 21.5  | 306.3 | 4.0 |
| LowerWhite-Spot 73  | 395  | 233027   | 2.4  | 19.1924 | 1.0  | 0.3496 | 1.8  | 0.0487 | 1.5 | 0.83 | 306.4 | 4.5 | 304.4 | 4.7  | 289.0  | 22.7  | 306.4 | 4.5 |
| LowerWhite-Spot 259 | 1913 | 11658476 | 2.0  | 19.1184 | 0.7  | 0.3510 | 1.2  | 0.0487 | 1.0 | 0.84 | 306.5 | 3.1 | 305.5 | 3.2  | 297.8  | 15.1  | 306.5 | 3.1 |
| LowerWhite-Spot 38  | 3956 | 411328   | 4.1  | 19.0558 | 0.7  | 0.3522 | 1.4  | 0.0487 | 1.3 | 0.88 | 306.5 | 3.8 | 306.4 | 3.8  | 305.3  | 15.7  | 306.5 | 3.8 |
| LowerWhite-Spot 204 | 1258 | 217152   | 2.1  | 19.0424 | 0.7  | 0.3525 | 1.4  | 0.0487 | 1.2 | 0.88 | 306.6 | 3.7 | 306.6 | 3.7  | 306.9  | 15.2  | 306.6 | 3.7 |
| LowerWhite-Spot 142 | 1645 | 90554    | 3.4  | 19.5659 | 0.8  | 0.3434 | 1.6  | 0.0487 | 1.4 | 0.87 | 306.8 | 4.1 | 299.7 | 4.1  | 244.7  | 17.8  | 306.8 | 4.1 |
| LowerWhite-Spot 294 | 520  | 44045    | 2.6  | 19.2665 | 1.1  | 0.3489 | 1.9  | 0.0488 | 1.5 | 0.81 | 307.0 | 4.6 | 303.9 | 4.9  | 280.2  | 25.0  | 307.0 | 4.6 |
| LowerWhite-Spot 47  | 243  | 21409    | 3.9  | 19.4346 | 1.0  | 0.3459 | 1.5  | 0.0488 | 1.1 | 0.73 | 307.0 | 3.3 | 301.6 | 4.0  | 260.3  | 23.9  | 307.0 | 3.3 |
| LowerWhite-Spot 197 | 552  | 81245    | 3.2  | 18.9852 | 0.9  | 0.3543 | 1.5  | 0.0488 | 1.2 | 0.80 | 307.2 | 3.6 | 307.9 | 4.0  | 313.7  | 20.8  | 307.2 | 3.6 |
| LowerWhite-Spot 180 | 349  | 56520    | 3.0  | 19.1070 | 0.9  | 0.3524 | 1.6  | 0.0489 | 1.4 | 0.84 | 307.5 | 4.1 | 306.5 | 4.3  | 299.1  | 20.6  | 307.5 | 4.1 |
| LowerWhite-Spot 170 | 1021 | 410461   | 2.7  | 19.1071 | 0.8  | 0.3528 | 1.5  | 0.0489 | 1.3 | 0.84 | 307.9 | 3.9 | 306.9 | 4.1  | 299.1  | 19.0  | 307.9 | 3.9 |
| LowerWhite-Spot 62  | 339  | 213852   | 4.7  | 19.1514 | 0.9  | 0.3523 | 1.4  | 0.0490 | 1.1 | 0.80 | 308.1 | 3.4 | 306.4 | 3.8  | 293.9  | 19.4  | 308.1 | 3.4 |
| LowerWhite-Spot 26  | 2262 | 283266   | 1.4  | 18.9241 | 0.7  | 0.3569 | 1.7  | 0.0490 | 1.5 | 0.90 | 308.4 | 4.5 | 309.9 | 4.5  | 321.1  | 16.4  | 308.4 | 4.5 |
| LowerWhite-Spot 88  | 738  | 670770   | 3.0  | 19.1759 | 0.9  | 0.3529 | 1.5  | 0.0491 | 1.2 | 0.79 | 309.0 | 3.5 | 306.9 | 3.9  | 291.0  | 20.3  | 309.0 | 3.5 |
| LowerWhite-Spot 293 | 995  | 85308    | 3.9  | 19.0694 | 0.8  | 0.3552 | 1.4  | 0.0491 | 1.2 | 0.83 | 309.3 | 3.6 | 308.6 | 3.9  | 303.6  | 18.4  | 309.3 | 3.6 |
| LowerWhite-Spot 120 | 503  | 111007   | 2.1  | 19.0874 | 1.1  | 0.3563 | 1.7  | 0.0493 | 1.3 | 0.77 | 310.5 | 4.0 | 309.4 | 4.5  | 301.5  | 24.6  | 310.5 | 4.0 |
| LowerWhite-Spot 247 | 643  | 3914     | 1.7  | 9.7004  | 11.3 | 0.7037 | 11.7 | 0.0495 | 3.1 | 0.26 | 311.6 | 9.3 | 541.0 | 49.2 | 1679.6 | 209.8 | 311.6 | 9.3 |
| LowerWhite-Spot 150 | 787  | 258470   | 2.9  | 19.2186 | 0.8  | 0.3620 | 1.4  | 0.0505 | 1.2 | 0.81 | 317.5 | 3.6 | 313.7 | 3.8  | 285.9  | 18.9  | 317.5 | 3.6 |
| LowerWhite-Spot 3   | 474  | 68448    | 2.2  | 18.4380 | 1.1  | 0.3938 | 2.0  | 0.0527 | 1.6 | 0.83 | 331.0 | 5.3 | 337.1 | 5.6  | 379.9  | 24.9  | 331.0 | 5.3 |
| LowerWhite-Spot 244 | 115  | 13206    | 3.8  | 19.0604 | 1.3  | 0.3811 | 1.8  | 0.0527 | 1.3 | 0.72 | 331.1 | 4.2 | 327.8 | 5.1  | 304.7  | 29.2  | 331.1 | 4.2 |
| LowerWhite-Spot 228 | 80   | 69079    | 3.2  | 18.5295 | 1.5  | 0.3939 | 2.1  | 0.0530 | 1.5 | 0.70 | 332.6 | 4.7 | 337.2 | 6.0  | 368.7  | 34.0  | 332.6 | 4.7 |
| LowerWhite-Spot 36  | 267  | 20327    | 1.5  | 18.8067 | 1.4  | 0.3904 | 1.8  | 0.0533 | 1.3 | 0.68 | 334.6 | 4.1 | 334.6 | 5.3  | 335.2  | 30.8  | 334.6 | 4.1 |
| LowerWhite-Spot 246 | 919  | 152401   | 1.6  | 18.5272 | 0.7  | 0.3972 | 1.8  | 0.0534 | 1.7 | 0.91 | 335.4 | 5.4 | 339.6 | 5.3  | 369.0  | 16.8  | 335.4 | 5.4 |
| LowerWhite-Spot 13  | 315  | 115907   | 3.0  | 18.5174 | 1.2  | 0.4060 | 1.6  | 0.0546 | 1.1 | 0.65 | 342.4 | 3.5 | 346.0 | 4.8  | 370.2  | 27.7  | 342.4 | 3.5 |
| LowerWhite-Spot 50  | 106  | 14750    | 3.9  | 19.2749 | 1.2  | 0.3921 | 1.5  | 0.0548 | 0.9 | 0.60 | 344.1 | 3.1 | 335.9 | 4.4  | 279.2  | 28.2  | 344.1 | 3.1 |
| LowerWhite-Spot 70  | 137  | 274480   | 2.9  | 18.9127 | 1.3  | 0.4001 | 1.7  | 0.0549 | 1.1 | 0.66 | 344.6 | 3.7 | 341.7 | 4.8  | 322.4  | 28.6  | 344.6 | 3   |

|                  |      |        |     |         |     |        |     |        |     |      |       |     |       |     |       |       |       |     |
|------------------|------|--------|-----|---------|-----|--------|-----|--------|-----|------|-------|-----|-------|-----|-------|-------|-------|-----|
| Nabesna-Spot 107 | 207  | 6242   | 2.0 | 20.9528 | 7.3 | 0.0234 | 7.8 | 0.0036 | 2.7 | 0.35 | 22.9  | 0.6 | 23.5  | 1.8 | 85.7  | 173.3 | 22.9  | 0.6 |
| Nabesna-Spot 85  | 89   | 34219  | 2.7 | 18.8952 | 5.4 | 0.1303 | 5.7 | 0.0179 | 1.7 | 0.30 | 114.1 | 1.9 | 124.3 | 6.7 | 325.5 | 123.8 | 114.1 | 1.9 |
| Nabesna-Spot 101 | 125  | 9121   | 2.8 | 20.1016 | 3.8 | 0.1232 | 4.2 | 0.0180 | 1.8 | 0.43 | 114.8 | 2.1 | 118.0 | 4.7 | 183.2 | 88.7  | 114.8 | 2.1 |
| Nabesna-Spot 33  | 128  | 17015  | 2.1 | 19.5141 | 5.3 | 0.1276 | 5.5 | 0.0181 | 1.6 | 0.29 | 115.3 | 1.9 | 121.9 | 6.3 | 251.9 | 121.4 | 115.3 | 1.9 |
| Nabesna-Spot 38  | 94   | 22829  | 1.9 | 19.8388 | 4.4 | 0.1256 | 4.6 | 0.0181 | 1.2 | 0.26 | 115.4 | 1.4 | 120.1 | 5.2 | 213.8 | 102.1 | 115.4 | 1.4 |
| Nabesna-Spot 65  | 243  | 52273  | 1.4 | 19.9012 | 3.0 | 0.1254 | 3.2 | 0.0181 | 1.1 | 0.34 | 115.6 | 1.2 | 120.0 | 3.7 | 206.5 | 70.7  | 115.6 | 1.2 |
| Nabesna-Spot 63  | 161  | 13162  | 2.6 | 20.8506 | 4.4 | 0.1198 | 4.6 | 0.0181 | 1.5 | 0.32 | 115.7 | 1.7 | 114.9 | 5.0 | 97.3  | 103.8 | 115.7 | 1.7 |
| Nabesna-Spot 103 | 181  | 14706  | 2.4 | 20.5158 | 4.1 | 0.1218 | 4.3 | 0.0181 | 1.5 | 0.35 | 115.8 | 1.7 | 116.7 | 4.8 | 135.5 | 95.7  | 115.8 | 1.7 |
| Nabesna-Spot 87  | 216  | 91804  | 2.2 | 19.7409 | 3.8 | 0.1268 | 4.0 | 0.0181 | 1.3 | 0.33 | 116.0 | 1.5 | 121.2 | 4.6 | 225.2 | 87.4  | 116.0 | 1.5 |
| Nabesna-Spot 46  | 279  | 64003  | 1.4 | 19.9356 | 2.7 | 0.1255 | 2.9 | 0.0182 | 1.0 | 0.35 | 116.0 | 1.2 | 120.1 | 3.2 | 202.5 | 62.2  | 116.0 | 1.2 |
| Nabesna-Spot 17  | 211  | 303553 | 1.6 | 19.0640 | 4.0 | 0.1313 | 4.1 | 0.0182 | 1.1 | 0.25 | 116.0 | 1.2 | 125.3 | 4.9 | 305.3 | 91.1  | 116.0 | 1.2 |
| Nabesna-Spot 1   | 300  | 57388  | 2.3 | 20.2575 | 3.7 | 0.1236 | 4.1 | 0.0182 | 1.6 | 0.40 | 116.0 | 1.9 | 118.4 | 4.5 | 165.2 | 87.1  | 116.0 | 1.9 |
| Nabesna-Spot 98  | 507  | 51439  | 1.8 | 20.5092 | 2.2 | 0.1221 | 2.6 | 0.0182 | 1.3 | 0.50 | 116.1 | 1.5 | 117.0 | 2.8 | 136.2 | 52.5  | 116.1 | 1.5 |
| Nabesna-Spot 15  | 1323 | 236554 | 2.2 | 20.4125 | 1.3 | 0.1228 | 1.6 | 0.0182 | 1.0 | 0.60 | 116.1 | 1.1 | 117.6 | 1.8 | 147.4 | 30.2  | 116.1 | 1.1 |
| Nabesna-Spot 11  | 63   | 14659  | 3.4 | 19.1732 | 6.6 | 0.1312 | 6.9 | 0.0182 | 2.1 | 0.30 | 116.5 | 2.4 | 125.1 | 8.2 | 292.3 | 151.0 | 116.5 | 2.4 |
| Nabesna-Spot 12  | 142  | 140837 | 1.6 | 19.5098 | 4.4 | 0.1290 | 4.7 | 0.0183 | 1.5 | 0.32 | 116.6 | 1.8 | 123.2 | 5.4 | 252.4 | 102.2 | 116.6 | 1.8 |
| Nabesna-Spot 8   | 123  | 14399  | 2.2 | 18.9091 | 5.1 | 0.1333 | 5.4 | 0.0183 | 1.8 | 0.33 | 116.8 | 2.0 | 127.0 | 6.4 | 323.9 | 115.2 | 116.8 | 2.0 |
| Nabesna-Spot 86  | 119  | 56726  | 1.8 | 19.8566 | 3.6 | 0.1270 | 3.9 | 0.0183 | 1.6 | 0.40 | 116.9 | 1.8 | 121.4 | 4.5 | 211.7 | 83.4  | 116.9 | 1.8 |
| Nabesna-Spot 64  | 102  | 39186  | 3.2 | 20.4422 | 5.4 | 0.1234 | 5.6 | 0.0183 | 1.3 | 0.24 | 116.9 | 1.5 | 118.2 | 6.2 | 143.9 | 127.6 | 116.9 | 1.5 |
| Nabesna-Spot 13  | 118  | 18029  | 3.1 | 19.9436 | 3.7 | 0.1266 | 4.0 | 0.0183 | 1.5 | 0.38 | 116.9 | 1.7 | 121.0 | 4.6 | 201.6 | 86.6  | 116.9 | 1.7 |
| Nabesna-Spot 106 | 113  | 45316  | 1.9 | 19.8659 | 4.5 | 0.1271 | 4.9 | 0.0183 | 1.9 | 0.38 | 116.9 | 2.2 | 121.5 | 5.6 | 210.6 | 105.0 | 116.9 | 2.2 |
| Nabesna-Spot 76  | 145  | 44883  | 1.9 | 20.3622 | 3.7 | 0.1241 | 4.0 | 0.0183 | 1.5 | 0.37 | 117.0 | 1.7 | 118.7 | 4.4 | 153.1 | 86.4  | 117.0 | 1.7 |
| Nabesna-Spot 93  | 91   | 17767  | 3.0 | 19.8065 | 5.1 | 0.1275 | 5.3 | 0.0183 | 1.5 | 0.29 | 117.0 | 1.8 | 121.9 | 6.1 | 217.6 | 117.2 | 117.0 | 1.8 |
| Nabesna-Spot 60  | 488  | 270517 | 4.4 | 20.0423 | 2.2 | 0.1262 | 2.4 | 0.0183 | 1.0 | 0.40 | 117.2 | 1.1 | 120.7 | 2.8 | 190.1 | 51.9  | 117.2 | 1.1 |
| Nabesna-Spot 24  | 416  | 119062 | 4.0 | 19.9857 | 2.2 | 0.1266 | 2.4 | 0.0184 | 1.1 | 0.43 | 117.2 | 1.2 | 121.1 | 2.8 | 196.7 | 51.3  | 117.2 | 1.2 |
| Nabesna-Spot 69  | 709  | 64007  | 2.6 | 20.6293 | 1.5 | 0.1227 | 1.9 | 0.0184 | 1.2 | 0.63 | 117.3 | 1.4 | 117.5 | 2.2 | 122.5 | 35.5  | 117.3 | 1.4 |
| Nabesna-Spot 57  | 169  | 27806  | 2.9 | 19.4005 | 4.7 | 0.1306 | 5.0 | 0.0184 | 1.5 | 0.31 | 117.4 | 1.8 | 124.7 | 5.8 | 265.3 | 108.9 | 117.4 | 1.8 |
| Nabesna-Spot 37  | 150  | 35210  | 1.6 | 20.0929 | 3.8 | 0.1261 | 4.1 | 0.0184 | 1.6 | 0.38 | 117.4 | 1.8 | 120.6 | 4.7 | 184.2 | 89.1  | 117.4 | 1.8 |
| Nabesna-Spot 41  | 296  | 64576  | 3.9 | 20.5882 | 2.8 | 0.1231 | 3.0 | 0.0184 | 1.2 | 0.40 | 117.4 | 1.4 | 117.9 | 3.4 | 127.2 | 65.2  | 117.4 | 1.4 |
| Nabesna-Spot 50  | 185  | 50913  | 2.1 | 19.7073 | 4.1 | 0.1287 | 4.3 | 0.0184 | 1.4 | 0.32 | 117.5 | 1.6 | 122.9 | 5.0 | 229.1 | 93.7  | 117.5 | 1.6 |
| Nabesna-Spot 108 | 95   | 12568  | 2.5 | 17.5785 | 7.4 | 0.1443 | 7.6 | 0.0184 | 2.0 | 0.26 | 117.5 | 2.3 | 136.9 | 9.8 | 487.2 | 163.3 | 117.5 | 2.3 |
| Nabesna-Spot 66  | 233  | 69888  | 2.5 | 20.5814 | 2.5 | 0.1233 | 2.7 | 0.0184 | 1.2 | 0.42 | 117.6 | 1.3 | 118.0 | 3.1 | 128.0 | 58.5  | 117.6 | 1.3 |
| Nabesna-Spot 102 | 107  | 17672  | 2.1 | 20.0653 | 4.9 | 0.1265 | 5.2 | 0.0184 | 2.0 | 0.37 | 117.6 | 2.3 | 120.9 | 6.0 | 187.4 | 113.5 | 117.6 | 2.3 |
| Nabesna-Spot 32  | 162  | 56142  | 1.8 | 20.9988 | 4.0 | 0.1209 | 4.1 | 0.0184 | 1.1 | 0.26 | 117.6 | 1.2 | 115.9 | 4.5 | 80.5  | 94.8  | 117.6 | 1.2 |
| Nabesna-Spot 105 | 99   | 6895   | 2.3 | 20.7308 | 5.8 | 0.1226 | 6.2 | 0.0184 | 2.0 | 0.33 | 117.7 | 2.4 | 117.4 | 6.9 | 110.9 | 137.9 | 117.7 | 2.4 |
| Nabesna-Spot 109 | 124  | 24349  | 3.5 | 16.3298 | 5.6 | 0.1556 | 5.9 | 0.0184 | 1.8 | 0.31 | 117.7 | 2.1 | 146.9 | 8.0 | 647.6 | 120.3 | 117.7 | 2.1 |
| Nabesna-Spot 14  | 103  | 50099  | 1.8 | 20.8396 | 4.6 | 0.1221 | 4.8 | 0.0185 | 1.4 | 0.29 | 117.9 | 1.6 | 117.0 | 5.3 | 98.5  | 109.7 | 117.9 | 1.6 |
| Nabesna-Spot 39  | 129  | 20972  | 2.0 | 18.9430 | 4.1 | 0.1343 | 4.5 | 0.0185 | 1.7 | 0.39 | 117.9 | 2.0 | 128.0 | 5.4 | 319.8 | 93.3  | 117.9 | 2.0 |
| Nabesna-Spot 62  | 109  | 25374  | 3.0 | 20.7395 | 4.3 | 0.1227 | 4.6 | 0.0185 | 1.6 | 0.35 | 117.9 | 1.9 | 117.5 | 5.1 | 109.9 | 101.7 | 117.9 | 1.9 |
| Nabesna-Spot 21  | 518  | 405771 | 3.0 | 19.7022 | 2.3 | 0.1293 | 2.6 | 0.0185 | 1.2 | 0.48 | 118.0 | 1.4 | 123.4 | 3.0 | 229.7 | 52.4  | 118.0 | 1.4 |
| Nabesna-Spot 84  | 143  | 14782  | 1.7 | 20.6177 | 3.6 | 0.1235 | 3.8 | 0.0185 | 1.4 | 0.35 | 118.0 | 1.6 | 118.3 | 4.3 | 123.8 | 84.2  | 118.0 | 1.6 |
| Nabesna-Spot 83  | 78   | 7411   | 2.1 | 21.5405 | 5.7 | 0.1182 | 6.0 | 0.0185 | 1.9 | 0.31 | 118.0 | 2.2 | 113.5 | 6.5 | 19.7  | 138.1 | 118.0 | 2.2 |
| Nabesna-Spot 77  | 88   | 52698  | 2.5 | 19.7870 | 6.2 | 0.1287 | 6.4 | 0.0185 | 1.7 | 0.26 | 118.0 | 2.0 | 123.0 | 7.4 | 219.8 | 143.4 | 118.0 | 2.0 |
| Nabesna-Spot 16  | 315  | 54997  | 2.2 | 20.1296 | 3.3 | 0.1266 | 3.5 | 0.0185 | 1.1 | 0.33 | 118.0 | 1.3 | 121.0 | 4.0 | 179.9 | 77.5  | 118.0 | 1.3 |
| Nabesna-Spot 89  | 83   | 16688  | 2.1 | 19.7212 | 6.1 | 0.1294 | 6.5 | 0.0185 | 2.1 | 0.33 | 118.2 | 2.5 | 123.5 | 7.6 | 227.5 | 141.9 | 118.2 | 2.5 |
| Nabesna-Spot 42  | 227  | 196271 | 3.1 | 20.3667 | 3.6 | 0.1253 | 4.0 | 0.0185 | 1.7 | 0.42 | 118.2 | 1.9 | 119.9 | 4.5 | 152.6 | 84.7  | 118.2 | 1.9 |
| Nabesna-Spot 67  | 84   | 34871  | 1.9 | 19.0623 | 6.3 | 0.1339 | 6.6 | 0.0185 | 1.9 | 0.29 | 118.2 | 2.2 | 127.6 | 7.9 | 305.5 | 144.4 | 118.2 | 2.2 |
| Nabesna-Spot 22  | 106  | 9599   | 2.1 | 19.7700 | 5.2 | 0.1292 | 5.6 | 0.0185 | 2.1 | 0.37 | 118.3 | 2.4 | 123.4 | 6.5 | 221.8 | 120.0 | 118.3 | 2.4 |
| Nabesna-Spot 81  | 98   | 26204  | 2.7 | 20.6692 | 5.2 | 0.1236 | 5.5 | 0.0185 | 1.8 | 0.32 | 118.4 | 2.1 | 118.3 | 6.2 | 118.0 | 123.1 | 118.4 | 2.1 |
| Nabesna-Spot 75  | 212  | 44857  | 2.9 | 20.3183 | 3.4 | 0.1258 | 3.7 | 0.0185 | 1.5 | 0.42 | 118.4 | 1.8 | 120.3 | 4.2 | 158.2 | 78.6  | 118.4 | 1.8 |
| Nabesna-Spot 59  | 119  | 45644  | 2.4 | 20.6218 | 4.2 | 0.1240 | 4.5 | 0.0185 | 1.6 | 0.36 | 118.5 | 1.9 | 118.7 | 5.0 | 123.3 | 97.9  | 118.5 | 1.9 |
| Nabesna-Spot 55  | 82   | 60756  | 1.9 | 19.5318 | 4.6 | 0.1310 | 5.0 | 0.0186 | 1.9 | 0.37 | 118.5 | 2.2 | 125.0 | 5.9 | 249.8 | 106.8 | 118.5 | 2.2 |
| Nabesna-Spot 70  | 75   | 12886  | 2.2 | 20.5834 | 5.6 | 0.1243 | 5.9 | 0.0186 | 2.0 | 0.34 | 118.5 | 2.4 | 119.0 | 6.6 | 127.8 | 131.1 | 118.5 | 2.4 |
| Nabesna-Spot 44  | 214  | 15206  | 2.5 | 21.0572 | 3.2 | 0.1217 | 3.4 | 0.0186 | 1.2 | 0.34 | 118.7 | 1.4 | 116.6 | 3.8 | 73.9  | 76.5  | 118.7 | 1.4 |
| Nabesna-Spot 91  | 89   | 8735   | 3.5 | 20.9513 | 5.1 | 0.1223 | 5.5 | 0.0186 | 2.2 | 0.40 | 118.7 | 2.6 | 117.2 | 6.1 | 85.9  | 119.9 | 118.7 | 2.6 |
| Nabesna-Spot 7   | 260  | 48339  | 1.7 | 20.3516 | 3.6 | 0.1260 | 3.9 | 0.0186 | 1.3 | 0.33 | 118.8 | 1.5 | 120.5 | 4.4 | 154.3 | 85.3  | 118.8 | 1.5 |
| Nabesna-Spot 25  | 169  | 453870 | 1.8 | 19.6156 | 3.4 | 0.1309 | 3.7 | 0.0186 | 1.6 | 0.43 | 118.9 | 1.9 | 124.9 | 4.4 | 239.9 | 77.4  | 118.9 | 1.9 |
| Nabesna-Spot 26  | 136  | 142068 | 1.8 | 19.8907 | 4.8 | 0.1291 | 4.9 | 0.0186 | 1.3 | 0.27 | 119.0 | 1.6 | 123.3 | 5.7 | 207.7 | 110.5 | 119.0 | 1.6 |
| Nabesna-Spot 40  | 78   | 467023 | 2.6 | 21.1013 | 5.2 | 0.1217 | 5.5 | 0.0186 | 1.6 | 0.30 | 119.0 | 1.9 | 116.6 | 6.1 | 68.9  | 124.8 | 119.0 | 1.9 |
| Nabesna-Spot 6   | 97   | 48714  | 1.8 | 19.2190 | 4.8 | 0.1337 | 5.0 | 0.0186 | 1.6 | 0.31 | 119.0 | 1.9 | 127.4 | 6.0 | 286.8 | 109.6 | 119.0 | 1.9 |
| Nabesna-Spot 51  | 90   | 61596  | 1.9 | 19.7704 | 4.2 | 0.1300 | 4.5 | 0.0186 | 1.6 | 0.35 | 119.0 | 1.9 | 124.1 | 5.3 | 221.8 | 98.1  | 119.0 | 1.9 |
| Nabesna-Spot 29  | 177  | 392457 | 3.5 | 20.0745 | 3.2 | 0.1280 | 3.5 | 0.0186 | 1.4 | 0.40 | 119.0 | 1.6 | 122.3 | 4.0 | 186.3 | 74.9  | 119.0 | 1.6 |
| Nabesna-Spot 47  | 141  | 127403 | 2.3 | 20.1952 | 3.5 | 0.1273 | 3.8 | 0.0186 | 1.6 | 0.40 | 119.1 | 1.8 | 121.7 | 4.4 | 172.3 | 81.9  | 119.1 | 1.8 |
| Nabesna-Spot 99  | 211  | 108095 | 1.6 | 19.7640 | 3.3 | 0.1302 | 3.5 | 0.0187 | 1.1 | 0.33 | 119.2 | 1.3 | 124.3 | 4.1 | 222.5 | 76.4  | 119.2 | 1.3 |
| Nabesna-Spot 36  | 236  | 111250 | 2.6 | 20.3521 | 3.1 | 0.1265 | 3.3 | 0.0187 | 1.0 | 0.31 | 119.2 | 1.2 | 120.9 | 3.8 | 154.3 | 73.7  | 119.2 | 1.2 |
| Nabesna-Spot 48  | 108  | 23099  | 2.3 | 21.0687 | 4.3 | 0.1222 | 4.7 | 0.0187 | 1.9 | 0.41 | 119.3 | 2.2 | 117.1 | 5.2 | 72.6  | 101.3 | 119.3 | 2.2 |
| Nabesna-Spot 3   | 72   | 8303   | 2.3 | 19.8854 | 5.0 | 0.1295 | 5.2 | 0.0187 | 1.4 | 0.27 | 119.3 | 1.6 | 123.6 | 6.0 | 208.4 | 116.1 | 119.3 | 1.6 |
| Nabesna-Spot 94  | 89   | 77481  | 2.1 | 19.8085 | 4.9 | 0.1301 | 5.3 | 0.0    |     |      |       |     |       |     |       |       |       |     |

|                  |     |        |     |          |       |         |       |        |      |      |        |      |        |      |        |        |        |      |
|------------------|-----|--------|-----|----------|-------|---------|-------|--------|------|------|--------|------|--------|------|--------|--------|--------|------|
| Nabesna-Spot 96  | 70  | 33959  | 2.6 | 19.6545  | 5.8   | 0.1321  | 6.3   | 0.0188 | 2.4  | 0.38 | 120.3  | 2.8  | 126.0  | 7.5  | 235.4  | 134.9  | 120.3  | 2.8  |
| Nabesna-Spot 45  | 108 | 30812  | 2.5 | 19.8423  | 3.4   | 0.1309  | 3.8   | 0.0188 | 1.5  | 0.41 | 120.3  | 1.8  | 124.9  | 4.4  | 213.4  | 79.7   | 120.3  | 1.8  |
| Nabesna-Spot 27  | 60  | 21485  | 2.7 | 20.1810  | 5.8   | 0.1290  | 6.2   | 0.0189 | 2.0  | 0.33 | 120.6  | 2.4  | 123.2  | 7.2  | 174.0  | 136.0  | 120.6  | 2.4  |
| Nabesna-Spot 72  | 69  | 12559  | 2.8 | 20.1595  | 6.3   | 0.1295  | 6.5   | 0.0189 | 1.4  | 0.22 | 120.9  | 1.7  | 123.6  | 7.6  | 176.5  | 147.7  | 120.9  | 1.7  |
| Nabesna-Spot 68  | 89  | 16337  | 2.6 | 20.6750  | 4.0   | 0.1262  | 4.3   | 0.0189 | 1.8  | 0.41 | 120.9  | 2.1  | 120.7  | 4.9  | 117.3  | 93.5   | 120.9  | 2.1  |
| Nabesna-Spot 97  | 125 | 83254  | 1.7 | 20.6517  | 4.3   | 0.1264  | 4.7   | 0.0189 | 1.9  | 0.40 | 120.9  | 2.3  | 120.9  | 5.4  | 119.9  | 101.6  | 120.9  | 2.3  |
| Nabesna-Spot 104 | 59  | 15610  | 2.4 | 19.6185  | 7.4   | 0.1331  | 7.8   | 0.0189 | 2.3  | 0.29 | 120.9  | 2.7  | 126.9  | 9.2  | 239.6  | 171.2  | 120.9  | 2.7  |
| Nabesna-Spot 73  | 124 | 16219  | 2.6 | 21.2922  | 4.4   | 0.1229  | 4.8   | 0.0190 | 1.9  | 0.39 | 121.2  | 2.2  | 117.7  | 5.3  | 47.5   | 104.7  | 121.2  | 2.2  |
| Nabesna-Spot 5   | 68  | 4707   | 2.8 | 22.2282  | 5.4   | 0.1178  | 5.8   | 0.0190 | 2.0  | 0.34 | 121.3  | 2.4  | 113.1  | 6.2  | 56.3   | 132.0  | 121.3  | 2.4  |
| Nabesna-Spot 58  | 97  | 15318  | 2.2 | 20.4983  | 5.6   | 0.1282  | 5.9   | 0.0191 | 1.7  | 0.29 | 121.7  | 2.0  | 122.5  | 6.8  | 137.5  | 132.7  | 121.7  | 2.0  |
| Nabesna-Spot 80  | 98  | 11107  | 2.3 | 21.5385  | 5.4   | 0.1221  | 5.8   | 0.0191 | 2.0  | 0.34 | 121.8  | 2.4  | 117.0  | 6.4  | 19.9   | 130.1  | 121.8  | 2.4  |
| Nabesna-Spot 56  | 23  | 41623  | 3.1 | 22.7104  | 7.9   | 0.1159  | 8.4   | 0.0191 | 2.8  | 0.34 | 121.9  | 3.4  | 111.4  | 8.9  | 108.8  | 195.5  | 121.9  | 3.4  |
| Nabesna-Spot 28  | 39  | 8608   | 3.3 | 20.7611  | 6.2   | 0.1269  | 6.6   | 0.0191 | 2.2  | 0.33 | 122.1  | 2.6  | 121.4  | 7.5  | 107.5  | 146.4  | 122.1  | 2.6  |
| Nabesna-Spot 10  | 79  | 23597  | 2.3 | 21.1642  | 5.4   | 0.1253  | 5.6   | 0.0192 | 1.5  | 0.26 | 122.8  | 1.8  | 119.9  | 6.3  | 61.9   | 128.2  | 122.8  | 1.8  |
| Nabesna-Spot 52  | 77  | 40826  | 2.4 | 19.8320  | 6.0   | 0.1341  | 6.3   | 0.0193 | 1.7  | 0.27 | 123.2  | 2.1  | 127.8  | 7.5  | 214.6  | 140.0  | 123.2  | 2.1  |
| Nabesna-Spot 54  | 69  | 23875  | 2.5 | 15.5511  | 5.6   | 0.1713  | 6.0   | 0.0193 | 2.3  | 0.38 | 123.3  | 2.8  | 160.5  | 9.0  | 751.6  | 118.2  | 123.3  | 2.8  |
| Nabesna-Spot 30  | 120 | 25284  | 4.2 | 20.3750  | 3.4   | 0.1348  | 3.6   | 0.0199 | 1.2  | 0.34 | 127.2  | 1.5  | 128.4  | 4.3  | 151.7  | 78.7   | 127.2  | 1.5  |
| Nabesna-Spot 34  | 618 | 64663  | 1.8 | 20.0822  | 2.1   | 0.1552  | 2.4   | 0.0226 | 1.2  | 0.49 | 144.1  | 1.7  | 146.5  | 3.3  | 185.4  | 48.5   | 144.1  | 1.7  |
| Nabesna-Spot 90  | 90  | 54856  | 1.6 | 18.9687  | 3.7   | 0.3403  | 4.0   | 0.0468 | 1.6  | 0.38 | 295.0  | 4.5  | 297.4  | 10.4 | 316.7  | 85.0   | 295.0  | 4.5  |
| Nabesna-Spot 71  | 915 | 120731 | 2.0 | 18.8385  | 1.3   | 0.3431  | 1.6   | 0.0469 | 1.0  | 0.60 | 295.3  | 2.8  | 299.5  | 4.1  | 332.3  | 28.9   | 295.3  | 2.8  |
| Nabesna-Spot 88  | 231 | 135630 | 2.6 | 13.0846  | 1.0   | 1.9678  | 1.4   | 0.1867 | 1.1  | 0.75 | 1103.7 | 10.9 | 1104.6 | 9.7  | 1106.2 | 19.1   | 1106.2 | 19.1 |
| Nadina River     |     |        |     |          |       |         |       |        |      |      |        |      |        |      |        |        |        |      |
| Nadina-Spot 39   | 126 | 18     | 2.8 | 0.1285   | 7.4   | -0.0004 | 50.5  | 0.0000 | 50.0 | 0.99 | 0.0    | 0.0  | 0.4    | 0.2  | NA     | NA     | 0.0    | 0.0  |
| Nadina-Spot 91   | 53  | 24     | 1.2 | 0.0368   | 50.0  | 0.0028  | 70.7  | 0.0000 | 50.0 | 0.71 | 0.0    | 0.0  | 2.8    | 2.0  | NA     | NA     | 0.0    | 0.0  |
| Nadina-Spot 53   | 200 | 17     | 1.8 | 1.9954   | NA    | -0.0001 | NA    | 0.0000 | 50.0 | NA   | 0.0    | 0.0  | 0.1    | NA   | NA     | NA     | 0.0    | 0.0  |
| Nadina-Spot 6    | 106 | 11     | 2.6 | 0.1873   | 70.6  | -0.0013 | 86.5  | 0.0000 | 50.0 | 0.58 | 0.0    | 0.0  | 1.3    | 1.1  | NA     | NA     | 0.0    | 0.0  |
| Nadina-Spot 83   | 105 | 20     | 0.8 | -0.0869  | 4.9   | -0.0038 | 50.2  | 0.0000 | 50.0 | 1.00 | 0.0    | 0.0  | 3.8    | 1.9  | 0.0    | 0.0    | 0.0    | 0.0  |
| Nadina-Spot 5    | 124 | 14     | 0.8 | 0.8250   | 26.2  | -0.0005 | 56.5  | 0.0000 | 50.0 | 0.89 | 0.0    | 0.0  | 0.5    | 0.3  | NA     | NA     | 0.0    | 0.0  |
| Nadina-Spot 32   | 295 | 24     | 1.8 | -0.6902  | 12.3  | -0.0007 | 37.0  | 0.0000 | 34.9 | 0.94 | 0.0    | 0.0  | 0.7    | 0.3  | 0.0    | 0.0    | 0.0    | 0.0  |
| Nadina-Spot 89   | 163 | 22     | 2.1 | -0.2714  | 5.6   | -0.0019 | 29.8  | 0.0000 | 29.2 | 0.98 | 0.0    | 0.0  | 1.9    | 0.6  | 0.0    | 0.0    | 0.0    | 0.0  |
| Nadina-Spot 67   | 105 | 20     | 1.8 | -0.1276  | 11.6  | -0.0052 | 34.5  | 0.0000 | 32.4 | 0.94 | 0.0    | 0.0  | 5.3    | 1.8  | 0.0    | 0.0    | 0.0    | 0.0  |
| Nadina-Spot 44   | 138 | 44     | 2.3 | -6.1861  | 12.3  | -0.0001 | 51.5  | 0.0000 | 50.0 | 0.97 | 0.0    | 0.0  | 0.1    | 0.1  | 0.0    | 0.0    | 0.0    | 0.0  |
| Nadina-Spot 54   | 147 | 25     | 1.3 | -0.4574  | 2.9   | -0.0016 | 50.1  | 0.0000 | 50.0 | 1.00 | 0.0    | 0.0  | 1.6    | 0.8  | 0.0    | 0.0    | 0.0    | 0.0  |
| Nadina-Spot 23   | 203 | 24     | 1.6 | -0.5107  | 0.0   | -0.0017 | 27.4  | 0.0000 | 27.4 | 1.00 | 0.0    | 0.0  | 1.7    | 0.5  | 0.0    | 0.0    | 0.0    | 0.0  |
| Nadina-Spot 57   | 338 | 46     | 1.5 | -1.8440  | 24.6  | -0.0006 | 55.7  | 0.0000 | 50.0 | 0.90 | 0.1    | 0.0  | 0.6    | 0.3  | NA     | NA     | 0.1    | 0.0  |
| Nadina-Spot 37   | 54  | 25     | 1.3 | -0.5393  | NA    | -0.0020 | NA    | 0.0000 | 50.0 | NA   | 0.1    | 0.0  | 2.1    | NA   | 0.0    | NA     | 0.1    | 0.0  |
| Nadina-Spot 77   | 119 | 13     | 2.3 | 0.7829   | NA    | -0.0015 | NA    | 0.0000 | 50.0 | NA   | 0.1    | 0.0  | 1.5    | NA   | NA     | NA     | 0.1    | 0.0  |
| Nadina-Spot 20   | 168 | 52     | 2.4 | 1.9118   | 32.5  | 0.0006  | 59.6  | 0.0000 | 50.0 | 0.84 | 0.1    | 0.0  | 0.6    | 0.4  | NA     | NA     | 0.1    | 0.0  |
| Nadina-Spot 38   | 299 | 30     | 0.9 | -0.9522  | 81.7  | -0.0013 | 85.4  | 0.0000 | 25.1 | 0.29 | 0.1    | 0.0  | 1.3    | 1.1  | 0.0    | 0.0    | 0.1    | 0.0  |
| Nadina-Spot 74   | 99  | 45     | 1.9 | -3.9599  | 17.2  | -0.0003 | 52.9  | 0.0000 | 50.0 | 0.95 | 0.1    | 0.0  | 0.3    | 0.2  | 0.0    | 0.0    | 0.1    | 0.0  |
| Nadina-Spot 62   | 395 | 42     | 1.1 | -2.8486  | 10.9  | -0.0005 | 33.8  | 0.0000 | 32.0 | 0.95 | 0.1    | 0.0  | 0.5    | 0.2  | 0.0    | 0.0    | 0.1    | 0.0  |
| Nadina-Spot 46   | 196 | 115    | 1.9 | -9.3569  | 0.4   | -0.0002 | 50.0  | 0.0000 | 50.0 | 1.00 | 0.1    | 0.0  | 0.2    | 0.1  | 0.0    | 0.0    | 0.1    | 0.0  |
| Nadina-Spot 98   | 266 | 60     | 2.0 | -15.8250 | 7.3   | -0.0001 | 37.9  | 0.0000 | 37.2 | 0.98 | 0.1    | 0.0  | 0.1    | 0.0  | 0.0    | 0.0    | 0.1    | 0.0  |
| Nadina-Spot 65   | 224 | 43     | 1.6 | -2.7019  | 5.4   | -0.0006 | 50.3  | 0.0000 | 50.0 | 0.99 | 0.1    | 0.0  | 0.6    | 0.3  | 0.0    | 0.0    | 0.1    | 0.0  |
| Nadina-Spot 25   | 322 | 68     | 0.5 | -25.5902 | 29.1  | -0.0001 | 45.4  | 0.0000 | 34.8 | 0.77 | 0.1    | 0.0  | 0.1    | 0.0  | 0.0    | 0.0    | 0.1    | 0.0  |
| Nadina-Spot 106  | 100 | 24     | 1.9 | -0.3962  | 2.3   | -0.0047 | 27.6  | 0.0000 | 27.5 | 1.00 | 0.1    | 0.0  | 4.8    | 1.3  | 0.0    | 0.0    | 0.1    | 0.0  |
| Nadina-Spot 84   | 176 | 110    | 2.5 | 4.4546   | 9.2   | 0.0005  | 50.8  | 0.0000 | 50.0 | 0.98 | 0.1    | 0.1  | 0.5    | 0.2  | 3013.2 | 148.2  | 0.1    | 0.1  |
| Nadina-Spot 2    | 243 | 374    | 2.8 | 6.0161   | 11.8  | 0.0004  | 51.4  | 0.0000 | 50.0 | 0.97 | 0.1    | 0.1  | 0.4    | 0.2  | 2519.9 | 199.3  | 0.1    | 0.1  |
| Nadina-Spot 69   | 306 | 80     | 1.0 | 31.2348  | 10.5  | 0.0001  | 29.8  | 0.0000 | 27.9 | 0.94 | 0.1    | 0.0  | 0.1    | 0.0  | 963.5  | 308.0  | 0.1    | 0.0  |
| Nadina-Spot 34   | 108 | 117    | 2.7 | 40.4336  | 4.4   | 0.0001  | 50.2  | 0.0000 | 50.0 | 1.00 | 0.1    | 0.1  | 0.1    | 0.0  | 1797.1 | 158.0  | 0.1    | 0.1  |
| Nadina-Spot 108  | 62  | 14     | 2.5 | 0.2772   | 142.0 | -0.0088 | 150.6 | 0.0000 | 50.0 | 0.33 | 0.1    | 0.1  | 9.0    | 13.6 | NA     | NA     | 0.1    | 0.1  |
| Nadina-Spot 81   | 234 | 42     | 2.1 | -2.4133  | 6.8   | -0.0011 | 27.2  | 0.0000 | 26.3 | 0.97 | 0.1    | 0.0  | 1.1    | 0.3  | 0.0    | 0.0    | 0.1    | 0.0  |
| Nadina-Spot 70   | 111 | 12     | 2.2 | 0.6433   | 18.2  | -0.0042 | 53.2  | 0.0000 | 50.0 | 0.94 | 0.1    | 0.1  | 4.3    | 2.3  | 0.0    | NA     | 0.1    | 0.1  |
| Nadina-Spot 24   | 78  | 12     | 2.9 | 0.3970   | 2.4   | -0.0070 | 50.1  | 0.0000 | 50.0 | 1.00 | 0.1    | 0.1  | 7.1    | 3.6  | NA     | NA     | 0.1    | 0.1  |
| Nadina-Spot 41   | 253 | 54     | 1.7 | -15.9697 | 7.0   | -0.0002 | 18.8  | 0.0000 | 17.4 | 0.93 | 0.1    | 0.0  | 0.2    | 0.0  | 0.0    | 0.0    | 0.1    | 0.0  |
| Nadina-Spot 73   | 72  | 40     | 2.2 | -2.7534  | 15.6  | -0.0010 | 52.4  | 0.0000 | 50.0 | 0.95 | 0.1    | 0.1  | 1.0    | 0.5  | 0.0    | 0.0    | 0.1    | 0.1  |
| Nadina-Spot 96   | 99  | 43     | 1.9 | 5.6447   | 17.0  | 0.0005  | 52.8  | 0.0000 | 50.0 | 0.95 | 0.1    | 0.1  | 0.5    | 0.3  | 2626.4 | 284.9  | 0.1    | 0.1  |
| Nadina-Spot 19   | 96  | 30     | 1.1 | -1.1393  | 8.9   | -0.0025 | 34.9  | 0.0000 | 33.8 | 0.97 | 0.1    | 0.0  | 2.6    | 0.9  | 0.0    | 0.0    | 0.1    | 0.0  |
| Nadina-Spot 56   | 75  | 3      | 2.3 | 0.6556   | 77.6  | -0.0048 | 92.3  | 0.0000 | 50.0 | 0.54 | 0.1    | 0.1  | 4.9    | 4.5  | NA     | NA     | 0.1    | 0.1  |
| Nadina-Spot 66   | 241 | 174    | 0.9 | 6.3592   | 28.1  | 0.0005  | 42.3  | 0.0000 | 31.6 | 0.75 | 0.2    | 0.0  | 0.5    | 0.2  | 2426.3 | 486.9  | 0.2    | 0.0  |
| Nadina-Spot 27   | 85  | 26     | 3.1 | -0.5012  | 79.7  | -0.0068 | 82.8  | 0.0000 | 22.2 | 0.27 | 0.2    | 0.0  | 6.9    | 5.8  | 0.0    | 0.0    | 0.2    | 0.0  |
| Nadina-Spot 82   | 136 | 125    | 2.6 | 11.3359  | 21.5  | 0.0003  | 39.8  | 0.0000 | 33.4 | 0.84 | 0.2    | 0.1  | 0.3    | 0.1  | 1387.2 | 418.6  | 0.2    | 0.1  |
| Nadina-Spot 109  | 162 | 31     | 1.1 | -0.8877  | 1.0   | -0.0039 | 18.2  | 0.0000 | 18.2 | 1.00 | 0.2    | 0.0  | 4.0    | 0.7  | 0.0    | 0.0    | 0.2    | 0.0  |
| Nadina-Spot 58   | 136 | 10     | 2.5 | 0.6415   | 700.5 | -0.0057 | 701.4 | 0.0000 | 35.9 | 0.05 | 0.2    | 0.1  | 5.8    | 41.1 | 0.0    | 1391.3 | 0.2    | 0.1  |
| Nadina-Spot 50   | 240 | 89     | 2.3 | -3.7358  | 1.0   | -0.0010 | 24.5  | 0.0000 | 24.5 | 1.00 | 0.2    | 0.0  | 1.0    | 0.2  | NA     | NA     | 0.2    | 0.0  |
| Nadina-Spot 76   | 111 | 9      | 2.2 | 0.5601   | 2.8   | -0.0067 | 39.4  | 0.0000 | 39.3 | 1.00 | 0.2    | 0.1  | 6.9    | 2.7  | NA     | NA     | 0.2    | 0.1  |
| Nadina-Spot 103  | 101 | 37     | 2.7 | -2.2378  | 2.7   | -0.0017 | 27.7  | 0.0000 | 27.5 | 1.00 | 0.2    | 0.0  | 1.7    | 0.5  | 0.0    | 0.0    | 0.2    | 0.0  |
| Nadina-Spot 3    | 150 | 80     | 2.1 | 122.4693 | 10.7  | 0.0000  | 51.1  | 0.0000 | 50.0 | 0.98 | 0.2    | 0.1  | 0.0    | 0.0  | 0.0    | 0.0    | 0.2    | 0.1  |
| Nadina-Spot 29   | 166 | 41     | 1.3 | -2.5220  | 7.3   | -0.0016 | 24.9  | 0.0000 | 23.8 | 0.96 | 0.2    | 0.0  | 1.6    | 0.4  | 0.0    | 0.0    | 0.2    | 0.0  |
| Nadina-Spot 7    | 488 | 1658   | 0.7 | 6.6484   | 10.2  | 0.0006  | 24.1  | 0.0000 | 21.9 | 0.91 | 0.2    | 0.0  | 0.6    | 0.1  | 2350.6 | 174.5  | 0.2    | 0.0  |
| Nadina-Spot 10   | 116 | 54     | 1.9 | -6.9883  | NA    | -0.0006 | NA    | 0.0000 | 32.7 | NA   | 0.2    | 0.1  | 0.6    | NA   | 0.0    | NA     | 0.2    | 0.1  |
| Nadina-Spot 97   | 262 | 45     | 1.5 | -1.6747  | 0.3   | -0.0025 | 15    |        |      |      |        |      |        |      |        |        |        |      |

|                 |     |       |     |           |       |         |       |         |       |      |       |      |       |       |        |       |       |      |
|-----------------|-----|-------|-----|-----------|-------|---------|-------|---------|-------|------|-------|------|-------|-------|--------|-------|-------|------|
| Nadina-Spot 104 | 846 | 361   | 1.0 | 33.0170   | 18.8  | 0.0002  | 20.7  | 0.0001  | 8.7   | 0.42 | 0.3   | 0.0  | 0.2   | 0.0   | 1129.7 | 577.2 | 0.3   | 0.0  |
| Nadina-Spot 90  | 176 | 74    | 1.2 | -58.5127  | 25.4  | -0.0001 | 38.4  | 0.0001  | 28.8  | 0.75 | 0.3   | 0.1  | 0.1   | 0.0   | 0.0    | 0.0   | 0.3   | 0.1  |
| Nadina-Spot 110 | 146 | 284   | 1.7 | -144.2063 | 2.1   | -0.0001 | 21.7  | 0.0001  | 21.6  | 1.00 | 0.4   | 0.1  | 0.1   | 0.0   | 0.0    | 0.0   | 0.4   | 0.1  |
| Nadina-Spot 4   | 364 | 97    | 1.0 | 3.4710    | 26.1  | 0.0023  | 28.5  | 0.0001  | 11.5  | 0.40 | 0.4   | 0.0  | 2.3   | 0.7   | 3407.4 | 414.3 | 0.4   | 0.0  |
| Nadina-Spot 68  | 85  | 4     | 3.1 | 0.9966    | 8.7   | -0.0083 | 50.7  | -0.0001 | 50.0  | 0.99 | 0.4   | 0.2  | 8.5   | 4.3   | 0.0    | 0.0   | 0.4   | 0.2  |
| Nadina-Spot 18  | 79  | 293   | 1.8 | 2.5007    | 9.9   | 0.0034  | 51.0  | 0.0001  | 50.0  | 0.98 | 0.4   | 0.2  | 3.4   | 1.7   | 3908.6 | 149.8 | 0.4   | 0.2  |
| Nadina-Spot 55  | 191 | 69    | 1.7 | -4.3585   | 2.7   | -0.0020 | 13.6  | 0.0001  | 13.3  | 0.98 | 0.4   | 0.1  | 2.0   | 0.3   | 0.0    | 0.0   | 0.4   | 0.1  |
| Nadina-Spot 102 | 138 | 87    | 1.6 | 158.6483  | 9.4   | 0.0001  | 21.4  | 0.0001  | 19.2  | 0.90 | 0.4   | 0.1  | 0.1   | 0.0   | 0.0    | 0.0   | 0.4   | 0.1  |
| Nadina-Spot 49  | 146 | 903   | 2.1 | 10.8270   | 8.9   | 0.0009  | 21.3  | 0.0001  | 19.4  | 0.91 | 0.4   | 0.1  | 0.9   | 0.2   | 1474.8 | 168.5 | 0.4   | 0.1  |
| Nadina-Spot 72  | 218 | 19190 | 2.2 | 13.0824   | 8.8   | 0.0008  | 15.8  | 0.0001  | 13.1  | 0.83 | 0.5   | 0.1  | 0.8   | 0.1   | 1106.6 | 176.2 | 0.5   | 0.1  |
| Nadina-Spot 95  | 132 | 161   | 1.8 | 6.9405    | 30.3  | 0.0014  | 38.0  | 0.0001  | 22.9  | 0.60 | 0.5   | 0.1  | 1.5   | 0.6   | 2276.8 | 534.7 | 0.5   | 0.1  |
| Nadina-Spot 48  | 47  | 47    | 2.4 | -3.6266   | 9.5   | -0.0029 | 39.1  | 0.0001  | 37.9  | 0.97 | 0.5   | 0.2  | 2.9   | 1.1   | 0.0    | 0.0   | 0.5   | 0.2  |
| Nadina-Spot 33  | 45  | 8     | 3.9 | 0.7770    | 7.6   | 0.0139  | 77.8  | 0.0001  | 77.4  | 1.00 | 0.5   | 0.4  | 14.0  | 10.8  | 0.0    | 0.0   | 0.5   | 0.4  |
| Nadina-Spot 31  | 63  | 64    | 3.5 | -8.1901   | 5.5   | -0.0014 | 31.3  | 0.0001  | 30.8  | 0.98 | 0.5   | 0.2  | 1.4   | 0.4   | 0.0    | 0.0   | 0.5   | 0.2  |
| Nadina-Spot 107 | 248 | 429   | 1.6 | 5.8465    | 9.7   | 0.0020  | 16.9  | 0.0001  | 13.8  | 0.82 | 0.6   | 0.1  | 2.0   | 0.3   | 2567.9 | 161.9 | 0.6   | 0.1  |
| Nadina-Spot 40  | 62  | 7     | 2.1 | 0.8563    | 5.5   | -0.0205 | 50.3  | -0.0001 | 50.0  | 0.99 | 0.8   | 0.4  | 21.0  | 10.7  | 0.0    | 0.0   | 0.8   | 0.4  |
| Nadina-Spot 71  | 153 | 139   | 2.5 | -29.5188  | 14.6  | -0.0007 | 18.6  | 0.0001  | 11.5  | 0.62 | 0.9   | 0.1  | 0.7   | 0.1   | 0.0    | 0.0   | 0.9   | 0.1  |
| Nadina-Spot 51  | 275 | 722   | 1.5 | 12.5664   | 22.0  | 0.0019  | 22.6  | 0.0002  | 5.4   | 0.24 | 1.1   | 0.1  | 1.9   | 0.4   | 1186.5 | 439.4 | 1.1   | 0.1  |
| Nadina-Spot 52  | 161 | 37757 | 1.7 | 5.0078    | 2.6   | 0.0052  | 28.5  | 0.0002  | 28.4  | 1.00 | 1.2   | 0.3  | 5.3   | 1.5   | 2823.6 | 41.8  | 1.2   | 0.3  |
| Nadina-Spot 16  | 89  | 0     | 2.4 | 1.1697    | 11.8  | 0.0272  | 219.5 | 0.0002  | 219.1 | 1.00 | 1.5   | 3.3  | 27.3  | 59.1  | 0.0    | 0.0   | 1.5   | 3.3  |
| Nadina-Spot 99  | 111 | 483   | 1.3 | 22.7606   | 14.1  | 0.0018  | 15.4  | 0.0003  | 6.1   | 0.40 | 1.9   | 0.1  | 1.8   | 0.3   | 114.3  | 349.0 | 1.9   | 0.1  |
| Nadina-Spot 47  | 183 | 708   | 0.8 | 5.4768    | 3.9   | 0.0132  | 7.4   | 0.0005  | 6.3   | 0.85 | 3.4   | 0.2  | 13.3  | 1.0   | 2676.5 | 64.2  | 3.4   | 0.2  |
| Nadina-Spot 45  | 50  | 1611  | 1.8 | 5.1986    | 4.6   | 0.0144  | 20.8  | 0.0005  | 20.3  | 0.98 | 3.5   | 0.7  | 14.5  | 3.0   | 2762.4 | 75.0  | 3.5   | 0.7  |
| Nadina-Spot 1   | 43  | 0     | 3.9 | 1.1847    | 6.8   | 0.0729  | 361.8 | 0.0006  | 361.7 | 1.00 | 4.0   | 14.6 | 71.4  | 254.8 | 0.0    | 0.0   | 4.0   | 14.6 |
| Nadina-Spot 15  | 98  | 1     | 2.3 | 1.1671    | 11.2  | 0.0767  | 102.1 | 0.0006  | 101.5 | 0.99 | 4.2   | 4.2  | 75.1  | 74.0  | 0.0    | 0.0   | 4.2   | 4.2  |
| Nadina-Spot 105 | 139 | 13637 | 2.4 | 21.0199   | 3.4   | 0.1371  | 3.6   | 0.0209  | 1.3   | 0.35 | 133.4 | 1.7  | 130.5 | 4.5   | 78.1   | 81.1  | 133.4 | 1.7  |
| Nadina-Spot 30  | 174 | 49372 | 2.8 | 20.4414   | 3.1   | 0.1424  | 3.4   | 0.0211  | 1.4   | 0.42 | 134.7 | 1.9  | 135.2 | 4.3   | 144.0  | 72.2  | 134.7 | 1.9  |
| Nadina-Spot 26  | 31  | 5050  | 4.1 | 19.6708   | 5.3   | 0.1659  | 5.8   | 0.0237  | 2.4   | 0.42 | 150.8 | 3.6  | 155.8 | 8.4   | 233.5  | 121.9 | 150.8 | 3.6  |
| Nizina River    |     |       |     |           |       |         |       |         |       |      |       |      |       |       |        |       |       |      |
| Nizina-Spot 224 | 181 | 170   | 2.4 | 63.4236   | 79.5  | 0.0017  | 79.6  | 0.0008  | 4.6   | 0.06 | 5.0   | 0.2  | 1.7   | 1.4   | NA     | NA    | 5.0   | 0.2  |
| Nizina-Spot 55  | 110 | 248   | 2.3 | 41.2797   | 12.9  | 0.0026  | 14.3  | 0.0008  | 6.1   | 0.43 | 5.1   | 0.3  | 2.7   | 0.4   | NA     | NA    | 5.1   | 0.3  |
| Nizina-Spot 276 | 143 | 417   | 2.2 | 84.0968   | 33.5  | 0.0013  | 34.2  | 0.0008  | 6.7   | 0.20 | 5.2   | 0.3  | 1.3   | 0.5   | NA     | NA    | 5.2   | 0.3  |
| Nizina-Spot 61  | 144 | 228   | 1.9 | 125.1602  | 70.3  | 0.0009  | 70.4  | 0.0008  | 4.5   | 0.06 | 5.3   | 0.2  | 0.9   | 0.6   | NA     | NA    | 5.3   | 0.2  |
| Nizina-Spot 168 | 179 | 1660  | 1.6 | 24.6807   | 8.2   | 0.0047  | 9.2   | 0.0008  | 4.2   | 0.46 | 5.4   | 0.2  | 4.8   | 0.4   | NA     | NA    | 5.4   | 0.2  |
| Nizina-Spot 258 | 141 | 327   | 1.9 | 80.0235   | 45.5  | 0.0015  | 45.8  | 0.0009  | 5.5   | 0.12 | 5.6   | 0.3  | 1.5   | 0.7   | NA     | NA    | 5.6   | 0.3  |
| Nizina-Spot 132 | 384 | 2765  | 1.8 | 13.4870   | 7.7   | 0.0095  | 8.9   | 0.0009  | 4.5   | 0.50 | 6.0   | 0.3  | 9.6   | 0.9   | 1045.5 | 155.3 | 6.0   | 0.3  |
| Nizina-Spot 117 | 178 | 445   | 2.3 | 26.5306   | 16.2  | 0.0050  | 16.9  | 0.0010  | 4.9   | 0.29 | 6.2   | 0.3  | 5.1   | 0.9   | NA     | NA    | 6.2   | 0.3  |
| Nizina-Spot 315 | 145 | 513   | 1.9 | 344.3879  | 22.9  | 0.0004  | 23.4  | 0.0010  | 4.8   | 0.20 | 6.4   | 0.3  | 0.4   | 0.1   | NA     | NA    | 6.4   | 0.3  |
| Nizina-Spot 208 | 170 | 423   | 1.5 | 22.7500   | 40.4  | 0.0061  | 40.7  | 0.0010  | 4.7   | 0.12 | 6.5   | 0.3  | 6.2   | 2.5   | NA     | NA    | 6.5   | 0.3  |
| Nizina-Spot 299 | 180 | 967   | 2.1 | 13.3933   | 10.3  | 0.0104  | 11.4  | 0.0010  | 4.9   | 0.43 | 6.5   | 0.3  | 10.5  | 1.2   | 1059.5 | 207.3 | 6.5   | 0.3  |
| Nizina-Spot 250 | 350 | 1457  | 1.2 | 21.0295   | 5.9   | 0.0067  | 6.8   | 0.0010  | 3.4   | 0.49 | 6.6   | 0.2  | 6.8   | 0.5   | 77.0   | 141.4 | 6.6   | 0.2  |
| Nizina-Spot 100 | 192 | 185   | 1.8 | 35.9571   | 46.1  | 0.0039  | 46.4  | 0.0010  | 5.5   | 0.12 | 6.6   | 0.4  | 4.0   | 1.9   | NA     | NA    | 6.6   | 0.4  |
| Nizina-Spot 29  | 163 | 385   | 1.3 | 61.9344   | 103.0 | 0.0023  | 103.1 | 0.0010  | 5.0   | 0.05 | 6.7   | 0.3  | 2.3   | 2.4   | NA     | NA    | 6.7   | 0.3  |
| Nizina-Spot 96  | 294 | 719   | 2.2 | 19.2374   | 20.6  | 0.0075  | 21.0  | 0.0010  | 4.0   | 0.19 | 6.7   | 0.3  | 7.5   | 1.6   | 284.6  | 475.1 | 6.7   | 0.3  |
| Nizina-Spot 286 | 153 | 562   | 1.4 | 143.5651  | 201.3 | 0.0010  | 201.3 | 0.0010  | 4.8   | 0.02 | 6.7   | 0.3  | 1.0   | 2.0   | NA     | NA    | 6.7   | 0.3  |
| Nizina-Spot 164 | 159 | 626   | 2.8 | 118.1360  | 32.3  | 0.0012  | 32.6  | 0.0010  | 4.5   | 0.14 | 6.7   | 0.3  | 1.2   | 0.4   | NA     | NA    | 6.7   | 0.3  |
| Nizina-Spot 205 | 199 | 992   | 1.4 | 29.4107   | 10.6  | 0.0049  | 11.7  | 0.0011  | 5.0   | 0.43 | 6.8   | 0.3  | 5.0   | 0.6   | NA     | NA    | 6.8   | 0.3  |
| Nizina-Spot 252 | 266 | 10714 | 2.2 | 19.4891   | 6.8   | 0.0075  | 7.9   | 0.0011  | 4.1   | 0.51 | 6.9   | 0.3  | 7.6   | 0.6   | 254.8  | 156.4 | 6.9   | 0.3  |
| Nizina-Spot 291 | 153 | 545   | 2.1 | 12.2099   | 12.9  | 0.0121  | 13.8  | 0.0011  | 4.7   | 0.34 | 6.9   | 0.3  | 12.2  | 1.7   | 1243.2 | 254.4 | 6.9   | 0.3  |
| Nizina-Spot 81  | 315 | 633   | 2.2 | 16.4641   | 9.5   | 0.0090  | 10.2  | 0.0011  | 3.8   | 0.37 | 6.9   | 0.3  | 9.1   | 0.9   | 630.0  | 204.4 | 6.9   | 0.3  |
| Nizina-Spot 236 | 321 | 331   | 1.9 | 104.9452  | 78.8  | 0.0014  | 78.9  | 0.0011  | 4.2   | 0.05 | 6.9   | 0.3  | 1.4   | 1.1   | NA     | NA    | 6.9   | 0.3  |
| Nizina-Spot 311 | 178 | 197   | 1.9 | 62.8830   | 39.9  | 0.0024  | 40.2  | 0.0011  | 4.8   | 0.12 | 7.0   | 0.3  | 2.4   | 1.0   | NA     | NA    | 7.0   | 0.3  |
| Nizina-Spot 277 | 218 | 2514  | 0.9 | 16.9643   | 7.9   | 0.0088  | 9.2   | 0.0011  | 4.7   | 0.51 | 7.0   | 0.3  | 8.9   | 0.8   | 565.1  | 173.1 | 7.0   | 0.3  |
| Nizina-Spot 40  | 167 | 1014  | 2.5 | 15.9319   | 10.3  | 0.0095  | 11.7  | 0.0011  | 5.6   | 0.48 | 7.0   | 0.4  | 9.6   | 1.1   | 700.3  | 219.5 | 7.0   | 0.4  |
| Nizina-Spot 124 | 74  | 198   | 1.5 | 31.3616   | 22.1  | 0.0049  | 23.7  | 0.0011  | 8.7   | 0.37 | 7.2   | 0.6  | 5.0   | 1.2   | NA     | NA    | 7.2   | 0.6  |
| Nizina-Spot 142 | 207 | 429   | 2.5 | 42.3381   | 76.2  | 0.0036  | 76.3  | 0.0011  | 4.8   | 0.06 | 7.2   | 0.3  | 3.7   | 2.8   | NA     | NA    | 7.2   | 0.3  |
| Nizina-Spot 166 | 103 | 699   | 1.0 | 19.8866   | 11.2  | 0.0078  | 12.1  | 0.0011  | 4.6   | 0.38 | 7.2   | 0.3  | 7.9   | 0.9   | 208.2  | 260.7 | 7.2   | 0.3  |
| Nizina-Spot 150 | 130 | 1440  | 1.6 | 12.7914   | 13.0  | 0.0125  | 14.2  | 0.0012  | 5.8   | 0.41 | 7.5   | 0.4  | 12.6  | 1.8   | 1151.4 | 258.8 | 7.5   | 0.4  |
| Nizina-Spot 293 | 252 | 12495 | 2.0 | 15.4584   | 8.1   | 0.0105  | 9.3   | 0.0012  | 4.4   | 0.48 | 7.6   | 0.3  | 10.6  | 1.0   | 764.2  | 171.9 | 7.6   | 0.3  |
| Nizina-Spot 313 | 322 | 1297  | 2.1 | 27.6944   | 16.6  | 0.0059  | 17.0  | 0.0012  | 3.7   | 0.22 | 7.6   | 0.3  | 5.9   | 1.0   | NA     | NA    | 7.6   | 0.3  |
| Nizina-Spot 247 | 534 | 1233  | 2.9 | 18.9570   | 7.2   | 0.0088  | 7.8   | 0.0012  | 3.0   | 0.39 | 7.8   | 0.2  | 8.9   | 0.7   | 318.1  | 163.2 | 7.8   | 0.2  |
| Nizina-Spot 98  | 323 | 3121  | 1.4 | 30.8672   | 4.6   | 0.0055  | 6.1   | 0.0012  | 3.9   | 0.64 | 7.9   | 0.3  | 5.5   | 0.3   | NA     | NA    | 7.9   | 0.3  |
| Nizina-Spot 45  | 124 | 2108  | 2.1 | 22.6038   | 8.8   | 0.0075  | 10.8  | 0.0012  | 6.2   | 0.57 | 7.9   | 0.5  | 7.6   | 0.8   | NA     | NA    | 7.9   | 0.5  |
| Nizina-Spot 30  | 200 | 576   | 2.0 | 25.5067   | 23.5  | 0.0068  | 23.9  | 0.0013  | 4.4   | 0.18 | 8.1   | 0.4  | 6.8   | 1.6   | NA     | NA    | 8.1   | 0.4  |
| Nizina-Spot 58  | 229 | 4101  | 1.7 | 18.0584   | 6.4   | 0.0101  | 7.4   | 0.0013  | 3.7   | 0.50 | 8.6   | 0.3  | 10.2  | 0.8   | 427.4  | 142.5 | 8.6   | 0.3  |
| Nizina-Spot 85  | 120 | 3035  | 3.1 | 33.6382   | 6.3   | 0.0055  | 7.8   | 0.0013  | 4.6   | 0.58 | 8.6   | 0.4  | 5.5   | 0.4   | NA     | NA    | 8.6   | 0.4  |
| Nizina-Spot 76  | 173 | 278   | 3.5 | 69.8994   | 182.8 | 0.0027  | 182.9 | 0.0014  | 5.1   | 0.03 | 8.8   | 0.5  | 2.7   | 5.0   | NA     | NA    | 8.8   | 0.5  |
| Nizina-Spot 287 | 463 | 1839  | 2.4 | 25.6208   | 5.1   | 0.0075  | 6.0   | 0.0014  | 3.3   | 0.54 | 9.0   | 0.3  | 7.6   | 0.5   | NA     | NA    | 9.0   | 0.3  |
| Nizina-Spot 108 | 849 | 4508  | 0.7 | 20.8867   | 3.2   | 0.0092  | 4.8   | 0.0014  | 3.6   | 0.75 | 9.0   | 0.3  | 9.3   | 0.4   | 93.2   | 76.0  | 9.0   | 0.3  |
| Nizina-Spot 178 | 351 | 1755  | 1.1 | 5.6153    | 27.2  | 0.0344  | 28.2  | 0.0014  | 7.3   | 0.26 | 9.0   | 0.7  | 34.3  | 9.5   | 2635.1 | 461.4 | 9.0   | 0.7  |
| Nizina-Spot 26  | 383 | 1675  | 2.7 | 24.2969   | 5.7   | 0.0080  | 6.8   | 0.0014  | 3.7   | 0.55 | 9.1   | 0.3  | 8.1   | 0.5   | NA     | NA    | 9.1   | 0.3  |
| Nizina-Spot 59  | 174 |       |     |           |       |         |       |         |       |      |       |      |       |       |        |       |       |      |

|                 |      |        |     |         |     |        |     |        |     |      |       |     |       |     |       |       |       |     |
|-----------------|------|--------|-----|---------|-----|--------|-----|--------|-----|------|-------|-----|-------|-----|-------|-------|-------|-----|
| Nizina-Spot 5   | 883  | 154655 | 2.8 | 20.9060 | 2.0 | 0.0538 | 3.5 | 0.0082 | 2.9 | 0.83 | 52.3  | 1.5 | 53.2  | 1.8 | 91.0  | 46.5  | 52.3  | 1.5 |
| Nizina-Spot 217 | 2084 | 11448  | 2.4 | 21.6634 | 1.3 | 0.0524 | 3.2 | 0.0082 | 2.9 | 0.91 | 52.8  | 1.5 | 51.8  | 1.6 | 6.1   | 32.3  | 52.8  | 1.5 |
| Nizina-Spot 249 | 523  | 74697  | 3.7 | 21.5282 | 2.2 | 0.0528 | 3.2 | 0.0082 | 2.3 | 0.72 | 52.9  | 1.2 | 52.2  | 1.6 | 21.1  | 53.7  | 52.9  | 1.2 |
| Nizina-Spot 177 | 617  | 22261  | 5.7 | 20.6109 | 2.0 | 0.0553 | 3.8 | 0.0083 | 3.2 | 0.84 | 53.1  | 1.7 | 54.7  | 2.0 | 124.6 | 47.9  | 53.1  | 1.7 |
| Nizina-Spot 68  | 624  | 7390   | 4.3 | 21.1893 | 1.6 | 0.0542 | 3.3 | 0.0083 | 2.9 | 0.88 | 53.5  | 1.5 | 53.6  | 1.7 | 59.1  | 37.2  | 53.5  | 1.5 |
| Nizina-Spot 266 | 354  | 3029   | 3.1 | 23.4960 | 2.2 | 0.0490 | 4.1 | 0.0084 | 3.4 | 0.84 | 53.6  | 1.8 | 48.6  | 2.0 | NA    | NA    | 53.6  | 1.8 |
| Nizina-Spot 158 | 471  | 6705   | 6.8 | 21.7823 | 2.6 | 0.0529 | 4.3 | 0.0084 | 3.5 | 0.80 | 53.7  | 1.8 | 52.3  | 2.2 | NA    | NA    | 53.7  | 1.8 |
| Nizina-Spot 125 | 371  | 3544   | 3.1 | 22.7686 | 2.4 | 0.0507 | 4.1 | 0.0084 | 3.3 | 0.80 | 53.8  | 1.8 | 50.2  | 2.0 | NA    | NA    | 53.8  | 1.8 |
| Nizina-Spot 78  | 397  | 4141   | 3.4 | 21.9103 | 3.2 | 0.0527 | 4.7 | 0.0084 | 3.5 | 0.74 | 53.8  | 1.9 | 52.1  | 2.4 | NA    | NA    | 53.8  | 1.9 |
| Nizina-Spot 3   | 508  | 10648  | 2.8 | 21.2410 | 2.1 | 0.0544 | 3.5 | 0.0084 | 2.8 | 0.80 | 53.8  | 1.5 | 53.8  | 1.8 | 53.2  | 49.3  | 53.8  | 1.5 |
| Nizina-Spot 151 | 465  | 3931   | 2.7 | 22.6970 | 2.4 | 0.0511 | 4.1 | 0.0084 | 3.3 | 0.80 | 54.0  | 1.7 | 50.6  | 2.0 | NA    | NA    | 54.0  | 1.7 |
| Nizina-Spot 160 | 467  | 5579   | 2.8 | 23.4727 | 2.4 | 0.0495 | 4.1 | 0.0084 | 3.4 | 0.82 | 54.1  | 1.8 | 49.0  | 2.0 | NA    | NA    | 54.1  | 1.8 |
| Nizina-Spot 197 | 405  | 9984   | 4.5 | 20.7059 | 2.6 | 0.0561 | 3.6 | 0.0084 | 2.5 | 0.68 | 54.1  | 1.3 | 55.4  | 1.9 | 113.8 | 62.1  | 54.1  | 1.3 |
| Nizina-Spot 186 | 402  | 4115   | 4.8 | 21.6478 | 2.0 | 0.0537 | 3.7 | 0.0084 | 3.1 | 0.84 | 54.2  | 1.7 | 53.1  | 1.9 | 7.7   | 48.7  | 54.2  | 1.7 |
| Nizina-Spot 244 | 386  | 2845   | 8.1 | 19.9920 | 3.7 | 0.0582 | 5.8 | 0.0084 | 4.4 | 0.76 | 54.2  | 2.4 | 57.4  | 3.2 | 195.9 | 86.4  | 54.2  | 2.4 |
| Nizina-Spot 106 | 710  | 6532   | 2.3 | 21.6195 | 1.8 | 0.0541 | 3.0 | 0.0085 | 2.4 | 0.81 | 54.5  | 1.3 | 53.5  | 1.6 | 10.9  | 42.6  | 54.5  | 1.3 |
| Nizina-Spot 238 | 522  | 33903  | 6.1 | 21.2071 | 2.2 | 0.0553 | 3.9 | 0.0085 | 3.3 | 0.84 | 54.6  | 1.8 | 54.7  | 2.1 | 57.0  | 51.6  | 54.6  | 1.8 |
| Nizina-Spot 298 | 603  | 8176   | 3.1 | 22.6004 | 2.0 | 0.0520 | 3.5 | 0.0085 | 3.0 | 0.83 | 54.7  | 1.6 | 51.5  | 1.8 | NA    | NA    | 54.7  | 1.6 |
| Nizina-Spot 111 | 286  | 5849   | 3.7 | 21.7105 | 2.8 | 0.0542 | 3.5 | 0.0085 | 2.1 | 0.61 | 54.8  | 1.2 | 53.6  | 1.8 | NA    | NA    | 54.8  | 1.2 |
| Nizina-Spot 231 | 626  | 11857  | 5.1 | 20.3901 | 1.6 | 0.0598 | 3.1 | 0.0089 | 2.7 | 0.86 | 56.8  | 1.5 | 59.0  | 1.8 | 149.9 | 37.4  | 56.8  | 1.5 |
| Nizina-Spot 99  | 1244 | 11786  | 3.3 | 21.3891 | 1.6 | 0.0574 | 3.3 | 0.0089 | 2.9 | 0.88 | 57.2  | 1.7 | 56.7  | 1.8 | 36.6  | 37.8  | 57.2  | 1.7 |
| Nizina-Spot 101 | 306  | 4687   | 1.9 | 23.4103 | 3.9 | 0.0568 | 5.0 | 0.0096 | 3.2 | 0.64 | 61.9  | 2.0 | 56.1  | 2.7 | NA    | NA    | 61.9  | 2.0 |
| Nizina-Spot 246 | 813  | 6946   | 3.6 | 21.6721 | 1.3 | 0.0638 | 3.0 | 0.0100 | 2.7 | 0.90 | 64.3  | 1.7 | 62.8  | 1.8 | 5.0   | 31.3  | 64.3  | 1.7 |
| Nizina-Spot 136 | 296  | 18307  | 5.5 | 20.9627 | 2.4 | 0.0692 | 3.3 | 0.0105 | 2.2 | 0.67 | 67.5  | 1.5 | 68.0  | 2.2 | 84.6  | 58.1  | 67.5  | 1.5 |
| Nizina-Spot 86  | 200  | 372139 | 3.7 | 20.9605 | 2.4 | 0.0731 | 4.8 | 0.0111 | 4.2 | 0.87 | 71.3  | 3.0 | 71.7  | 3.3 | 84.8  | 57.1  | 71.3  | 3.0 |
| Nizina-Spot 27  | 1100 | 18867  | 7.1 | 21.3557 | 1.4 | 0.0751 | 3.0 | 0.0116 | 2.6 | 0.89 | 74.6  | 1.9 | 73.5  | 2.1 | 40.4  | 32.9  | 74.6  | 1.9 |
| Nizina-Spot 304 | 278  | 37257  | 4.2 | 20.9489 | 2.4 | 0.0776 | 4.0 | 0.0118 | 3.2 | 0.80 | 75.6  | 2.4 | 75.9  | 2.9 | 86.2  | 57.0  | 75.6  | 2.4 |
| Nizina-Spot 271 | 339  | 5287   | 2.7 | 21.6840 | 2.9 | 0.0930 | 4.4 | 0.0146 | 3.3 | 0.75 | 93.6  | 3.0 | 90.3  | 3.8 | 3.7   | 70.0  | 93.6  | 3.0 |
| Nizina-Spot 239 | 653  | 12881  | 2.0 | 20.9832 | 1.7 | 0.1115 | 3.7 | 0.0170 | 3.3 | 0.89 | 108.5 | 3.6 | 107.3 | 3.8 | 82.3  | 39.6  | 108.5 | 3.6 |
| Nizina-Spot 285 | 561  | 25134  | 2.2 | 19.7293 | 1.6 | 0.1216 | 3.5 | 0.0174 | 3.1 | 0.89 | 111.3 | 3.5 | 116.6 | 3.9 | 226.6 | 37.9  | 111.3 | 3.5 |
| Nizina-Spot 120 | 52   | 1302   | 2.7 | 26.6318 | 6.1 | 0.0907 | 7.1 | 0.0175 | 3.6 | 0.51 | 112.0 | 4.0 | 88.1  | 6.0 | NA    | NA    | 112.0 | 4.0 |
| Nizina-Spot 67  | 66   | 3158   | 3.1 | 21.9735 | 4.8 | 0.1122 | 6.1 | 0.0179 | 3.7 | 0.60 | 114.3 | 4.1 | 108.0 | 6.2 | NA    | NA    | 114.3 | 4.1 |
| Nizina-Spot 18  | 357  | 6102   | 3.3 | 21.4561 | 1.6 | 0.1152 | 3.5 | 0.0179 | 3.2 | 0.90 | 114.6 | 3.6 | 110.7 | 3.7 | 29.1  | 37.3  | 114.6 | 3.6 |
| Nizina-Spot 77  | 403  | 11657  | 2.2 | 20.4855 | 1.3 | 0.1208 | 2.9 | 0.0180 | 2.6 | 0.89 | 114.7 | 3.0 | 115.8 | 3.2 | 138.9 | 31.3  | 114.7 | 3.0 |
| Nizina-Spot 145 | 96   | 1735   | 2.5 | 23.6934 | 6.3 | 0.1052 | 6.9 | 0.0181 | 2.8 | 0.41 | 115.6 | 3.2 | 101.6 | 6.6 | NA    | NA    | 115.6 | 3.2 |
| Nizina-Spot 310 | 187  | 122911 | 3.2 | 19.9492 | 2.5 | 0.1256 | 4.4 | 0.0182 | 3.6 | 0.82 | 116.2 | 4.2 | 120.2 | 5.0 | 200.9 | 58.7  | 116.2 | 4.2 |
| Nizina-Spot 28  | 346  | 101125 | 2.9 | 20.6207 | 2.0 | 0.1220 | 3.6 | 0.0182 | 3.0 | 0.84 | 116.6 | 3.4 | 116.8 | 3.9 | 123.5 | 46.1  | 116.6 | 3.4 |
| Nizina-Spot 90  | 201  | 22941  | 4.8 | 20.8833 | 1.8 | 0.1209 | 3.3 | 0.0183 | 2.8 | 0.85 | 117.0 | 3.2 | 115.9 | 3.6 | 93.6  | 41.7  | 117.0 | 3.2 |
| Nizina-Spot 15  | 217  | 118061 | 4.3 | 19.8380 | 1.7 | 0.1273 | 3.6 | 0.0183 | 3.2 | 0.88 | 117.0 | 3.7 | 121.6 | 4.2 | 213.9 | 39.3  | 117.0 | 3.7 |
| Nizina-Spot 46  | 173  | 5880   | 2.7 | 21.4530 | 2.3 | 0.1181 | 3.8 | 0.0184 | 3.1 | 0.80 | 117.5 | 3.6 | 113.4 | 4.1 | 29.4  | 54.0  | 117.5 | 3.6 |
| Nizina-Spot 133 | 167  | 3544   | 3.6 | 22.6194 | 2.9 | 0.1126 | 4.4 | 0.0185 | 3.3 | 0.76 | 118.1 | 3.9 | 108.4 | 4.5 | NA    | NA    | 118.1 | 3.9 |
| Nizina-Spot 223 | 244  | 34844  | 1.6 | 20.8566 | 1.8 | 0.1228 | 3.6 | 0.0186 | 3.0 | 0.85 | 118.7 | 3.6 | 117.6 | 4.0 | 96.7  | 43.8  | 118.7 | 3.6 |
| Nizina-Spot 165 | 336  | 9300   | 2.2 | 22.1313 | 2.4 | 0.1158 | 4.0 | 0.0186 | 3.2 | 0.80 | 118.7 | 3.8 | 111.2 | 4.2 | NA    | NA    | 118.7 | 3.8 |
| Nizina-Spot 140 | 227  | 22874  | 4.5 | 20.0207 | 2.1 | 0.1285 | 3.6 | 0.0187 | 2.9 | 0.82 | 119.3 | 3.5 | 122.8 | 4.1 | 192.6 | 47.8  | 119.3 | 3.5 |
| Nizina-Spot 104 | 383  | 22761  | 4.0 | 20.5181 | 1.8 | 0.1259 | 3.1 | 0.0187 | 2.5 | 0.81 | 119.7 | 3.0 | 120.4 | 3.5 | 135.2 | 42.3  | 119.7 | 3.0 |
| Nizina-Spot 180 | 150  | 2778   | 3.0 | 22.4655 | 2.1 | 0.1157 | 3.9 | 0.0189 | 3.2 | 0.84 | 120.4 | 3.8 | 111.1 | 4.1 | NA    | NA    | 120.4 | 3.8 |
| Nizina-Spot 253 | 175  | 9046   | 2.7 | 19.8692 | 2.3 | 0.1315 | 3.7 | 0.0190 | 2.8 | 0.78 | 121.0 | 3.4 | 125.4 | 4.3 | 210.2 | 53.7  | 121.0 | 3.4 |
| Nizina-Spot 207 | 174  | 3958   | 5.5 | 22.1589 | 3.5 | 0.1267 | 5.1 | 0.0204 | 3.8 | 0.74 | 130.0 | 4.8 | 121.1 | 5.8 | NA    | NA    | 130.0 | 4.8 |
| Nizina-Spot 167 | 304  | 14536  | 3.0 | 20.6514 | 2.3 | 0.1374 | 3.7 | 0.0206 | 2.9 | 0.78 | 131.4 | 3.7 | 130.8 | 4.5 | 120.0 | 53.9  | 131.4 | 3.7 |
| Nizina-Spot 215 | 258  | 47607  | 2.3 | 20.1752 | 1.6 | 0.1475 | 3.3 | 0.0216 | 2.9 | 0.87 | 137.7 | 3.9 | 139.7 | 4.3 | 174.7 | 37.3  | 137.7 | 3.9 |
| Nizina-Spot 7   | 256  | 59733  | 2.8 | 20.1910 | 1.9 | 0.1485 | 3.9 | 0.0218 | 3.4 | 0.88 | 138.7 | 4.7 | 140.6 | 5.1 | 172.8 | 43.9  | 138.7 | 4.7 |
| Nizina-Spot 152 | 226  | 3495   | 2.0 | 21.7230 | 1.8 | 0.1385 | 3.5 | 0.0218 | 3.1 | 0.86 | 139.2 | 4.2 | 131.7 | 4.4 | NA    | NA    | 139.2 | 4.2 |
| Nizina-Spot 306 | 104  | 2200   | 3.5 | 22.9282 | 2.9 | 0.1312 | 3.7 | 0.0218 | 2.4 | 0.64 | 139.2 | 3.3 | 125.2 | 4.4 | NA    | NA    | 139.2 | 3.3 |
| Nizina-Spot 87  | 526  | 109107 | 1.8 | 19.5067 | 2.2 | 0.1549 | 3.8 | 0.0219 | 3.1 | 0.82 | 139.8 | 4.3 | 146.2 | 5.1 | 252.8 | 50.3  | 139.8 | 4.3 |
| Nizina-Spot 16  | 83   | 2735   | 3.6 | 21.2977 | 3.3 | 0.1426 | 4.3 | 0.0220 | 2.7 | 0.63 | 140.5 | 3.7 | 135.3 | 5.4 | 46.8  | 78.9  | 140.5 | 3.7 |
| Nizina-Spot 181 | 152  | 9535   | 2.8 | 18.7996 | 2.3 | 0.1623 | 3.8 | 0.0221 | 2.9 | 0.78 | 141.2 | 4.1 | 152.7 | 5.3 | 337.0 | 53.1  | 141.2 | 4.1 |
| Nizina-Spot 280 | 592  | 68909  | 2.7 | 19.2525 | 1.5 | 0.1586 | 3.0 | 0.0222 | 2.6 | 0.86 | 141.3 | 3.7 | 149.5 | 4.2 | 282.9 | 35.1  | 141.3 | 3.7 |
| Nizina-Spot 209 | 179  | 2339   | 2.6 | 23.1377 | 7.6 | 0.1321 | 8.2 | 0.0222 | 3.3 | 0.40 | 141.4 | 4.6 | 126.0 | 9.8 | NA    | NA    | 141.4 | 4.6 |
| Nizina-Spot 169 | 129  | 8780   | 2.6 | 21.4773 | 2.1 | 0.1424 | 3.3 | 0.0222 | 2.6 | 0.78 | 141.5 | 3.6 | 135.2 | 4.2 | 26.7  | 50.0  | 141.5 | 3.6 |
| Nizina-Spot 242 | 164  | 11354  | 3.3 | 19.9963 | 1.9 | 0.1533 | 3.6 | 0.0222 | 3.1 | 0.86 | 141.9 | 4.4 | 144.9 | 4.9 | 195.4 | 43.1  | 141.9 | 4.4 |
| Nizina-Spot 261 | 156  | 7085   | 2.7 | 20.6774 | 2.8 | 0.1484 | 5.0 | 0.0223 | 4.1 | 0.82 | 141.9 | 5.8 | 140.5 | 6.6 | 117.0 | 67.0  | 141.9 | 5.8 |
| Nizina-Spot 35  | 194  | 6046   | 2.4 | 22.1516 | 2.2 | 0.1385 | 3.4 | 0.0223 | 2.6 | 0.76 | 141.9 | 3.6 | 131.7 | 4.2 | NA    | NA    | 141.9 | 3.6 |
| Nizina-Spot 204 | 104  | 3530   | 3.0 | 20.9825 | 2.5 | 0.1466 | 4.0 | 0.0223 | 3.2 | 0.79 | 142.3 | 4.5 | 138.9 | 5.2 | 82.3  | 58.2  | 142.3 | 4.5 |
| Nizina-Spot 102 | 179  | 66008  | 2.8 | 20.4678 | 2.4 | 0.1505 | 3.8 | 0.0224 | 2.9 | 0.78 | 142.5 | 4.1 | 142.4 | 5.0 | 141.0 | 56.1  | 142.5 | 4.1 |
| Nizina-Spot 289 | 55   | 854    | 3.2 | 31.6025 | 6.0 | 0.0975 | 7.1 | 0.0224 | 3.7 | 0.52 | 142.5 | 5.2 | 94.5  | 6.4 | NA    | NA    | 142.5 | 5.2 |
| Nizina-Spot 157 | 148  | 3931   | 3.5 | 20.2372 | 2.6 | 0.1524 | 4.5 | 0.0224 | 3.7 | 0.82 | 142.7 | 5.2 | 144.0 | 6.0 | 167.5 | 59.8  | 142.7 | 5.2 |
| Nizina-Spot 74  | 88   | 2945   | 3.1 | 21.6185 | 5.9 | 0.1429 | 6.6 | 0.0224 | 3.0 | 0.45 | 142.9 | 4.2 | 135.6 | 8.3 | 11.0  | 141.3 | 142.9 | 4.2 |
| Nizina-Spot 237 | 183  | 204160 | 3.9 | 20.1237 | 2.2 | 0.1537 | 4.1 | 0.0224 | 3.5 | 0.85 | 143.1 | 4.9 | 145.2 | 5.6 | 180.6 | 50.9  | 143.1 | 4.9 |
| Nizina-Spot 114 | 87   | 3866   | 4.3 | 20.5007 | 4.0 | 0.1511 | 4.9 | 0.0225 | 2.8 | 0.58 | 143.2 | 4.0 | 142.8 | 6.5 | 137.2 | 92.9  |       |     |

|                 |      |        |      |         |      |        |      |        |     |      |       |     |       |      |       |       |       |     |
|-----------------|------|--------|------|---------|------|--------|------|--------|-----|------|-------|-----|-------|------|-------|-------|-------|-----|
| Nizina-Spot 53  | 147  | 4551   | 3.6  | 22.0447 | 2.1  | 0.1435 | 3.7  | 0.0229 | 3.1 | 0.83 | 146.2 | 4.4 | 136.1 | 4.7  | NA    | NA    | 146.2 | 4.4 |
| Nizina-Spot 206 | 117  | 8614   | 1.8  | 19.5249 | 2.2  | 0.1621 | 4.1  | 0.0230 | 3.4 | 0.84 | 146.3 | 5.0 | 152.5 | 5.8  | 250.6 | 50.2  | 146.3 | 5.0 |
| Nizina-Spot 290 | 205  | 3095   | 1.5  | 21.6187 | 1.8  | 0.1465 | 3.1  | 0.0230 | 2.5 | 0.81 | 146.5 | 3.6 | 138.8 | 4.0  | 11.0  | 43.0  | 146.5 | 3.6 |
| Nizina-Spot 63  | 110  | 2142   | 3.9  | 23.2392 | 2.9  | 0.1363 | 4.2  | 0.0230 | 3.1 | 0.73 | 146.5 | 4.4 | 129.8 | 5.1  | NA    | NA    | 146.5 | 4.4 |
| Nizina-Spot 39  | 227  | 17774  | 2.2  | 20.4883 | 1.8  | 0.1548 | 3.1  | 0.0230 | 2.5 | 0.82 | 146.7 | 3.7 | 146.1 | 4.2  | 138.7 | 41.9  | 146.7 | 3.7 |
| Nizina-Spot 71  | 60   | 124015 | 4.1  | 19.8383 | 3.2  | 0.1599 | 4.7  | 0.0230 | 3.4 | 0.73 | 146.7 | 4.9 | 150.6 | 6.5  | 213.8 | 74.5  | 146.7 | 4.9 |
| Nizina-Spot 210 | 173  | 14615  | 4.4  | 20.2114 | 1.8  | 0.1573 | 3.2  | 0.0231 | 2.7 | 0.84 | 147.1 | 3.9 | 148.4 | 4.5  | 170.5 | 41.4  | 147.1 | 3.9 |
| Nizina-Spot 20  | 562  | 67851  | 39.7 | 20.2827 | 1.5  | 0.1568 | 3.0  | 0.0231 | 2.7 | 0.87 | 147.1 | 3.9 | 147.9 | 4.2  | 162.3 | 34.4  | 147.1 | 3.9 |
| Nizina-Spot 243 | 276  | 45537  | 4.1  | 20.0257 | 1.5  | 0.1588 | 2.8  | 0.0231 | 2.3 | 0.83 | 147.1 | 3.4 | 149.7 | 3.9  | 192.0 | 35.9  | 147.1 | 3.4 |
| Nizina-Spot 1   | 154  | 26039  | 2.7  | 19.8813 | 1.7  | 0.1601 | 3.0  | 0.0231 | 2.4 | 0.82 | 147.2 | 3.6 | 150.8 | 4.2  | 208.8 | 40.0  | 147.2 | 3.6 |
| Nizina-Spot 126 | 293  | 14758  | 4.6  | 20.7667 | 1.6  | 0.1535 | 3.3  | 0.0231 | 2.9 | 0.88 | 147.4 | 4.2 | 145.0 | 4.5  | 106.9 | 37.2  | 147.4 | 4.2 |
| Nizina-Spot 216 | 227  | 118434 | 2.4  | 20.9014 | 2.0  | 0.1527 | 3.8  | 0.0232 | 3.2 | 0.85 | 147.6 | 4.7 | 144.3 | 5.1  | 91.5  | 46.4  | 147.6 | 4.7 |
| Nizina-Spot 272 | 503  | 48958  | 2.9  | 19.8755 | 1.8  | 0.1607 | 3.5  | 0.0232 | 3.0 | 0.85 | 147.7 | 4.4 | 151.4 | 4.9  | 209.5 | 42.7  | 147.7 | 4.4 |
| Nizina-Spot 212 | 561  | 61221  | 36.6 | 20.3552 | 1.3  | 0.1570 | 3.1  | 0.0232 | 2.8 | 0.91 | 147.8 | 4.1 | 148.1 | 4.3  | 153.9 | 30.6  | 147.8 | 4.1 |
| Nizina-Spot 264 | 609  | 36974  | 21.1 | 20.3545 | 1.5  | 0.1572 | 3.8  | 0.0232 | 3.5 | 0.92 | 148.0 | 5.1 | 148.3 | 5.3  | 154.0 | 36.1  | 148.0 | 5.1 |
| Nizina-Spot 56  | 507  | 35803  | 3.0  | 20.1564 | 1.2  | 0.1588 | 2.6  | 0.0232 | 2.3 | 0.88 | 148.0 | 3.4 | 149.7 | 3.7  | 176.8 | 29.2  | 148.0 | 3.4 |
| Nizina-Spot 25  | 218  | 9697   | 2.3  | 20.1783 | 2.4  | 0.1587 | 4.0  | 0.0232 | 3.2 | 0.80 | 148.1 | 4.6 | 149.6 | 5.5  | 174.3 | 55.8  | 148.1 | 4.6 |
| Nizina-Spot 12  | 501  | 26146  | 18.0 | 20.4901 | 1.7  | 0.1565 | 3.1  | 0.0233 | 2.6 | 0.84 | 148.2 | 3.8 | 147.6 | 4.2  | 138.4 | 39.8  | 148.2 | 3.8 |
| Nizina-Spot 265 | 49   | 1633   | 3.3  | 20.6494 | 5.7  | 0.1553 | 7.0  | 0.0233 | 4.1 | 0.58 | 148.3 | 6.0 | 146.6 | 9.6  | 120.2 | 134.2 | 148.3 | 6.0 |
| Nizina-Spot 199 | 223  | 6975   | 1.5  | 20.8011 | 2.0  | 0.1542 | 3.4  | 0.0233 | 2.8 | 0.82 | 148.3 | 4.1 | 145.6 | 4.6  | 102.9 | 46.5  | 148.3 | 4.1 |
| Nizina-Spot 137 | 222  | 14486  | 3.2  | 20.1056 | 1.4  | 0.1595 | 3.6  | 0.0233 | 3.3 | 0.92 | 148.3 | 4.8 | 150.3 | 5.0  | 182.7 | 32.7  | 148.3 | 4.8 |
| Nizina-Spot 257 | 226  | 79821  | 2.4  | 20.1558 | 1.5  | 0.1592 | 3.7  | 0.0233 | 3.4 | 0.91 | 148.4 | 4.9 | 150.0 | 5.2  | 176.9 | 35.6  | 148.4 | 4.9 |
| Nizina-Spot 21  | 251  | 7146   | 1.3  | 21.0583 | 2.0  | 0.1524 | 4.3  | 0.0233 | 3.8 | 0.89 | 148.4 | 5.6 | 144.0 | 5.8  | 73.8  | 47.6  | 148.4 | 5.6 |
| Nizina-Spot 144 | 150  | 12033  | 2.4  | 21.3340 | 2.4  | 0.1504 | 3.8  | 0.0233 | 2.9 | 0.78 | 148.4 | 4.3 | 142.3 | 5.0  | 42.8  | 56.4  | 148.4 | 4.3 |
| Nizina-Spot 225 | 67   | 869    | 2.4  | 31.0034 | 13.6 | 0.1036 | 13.9 | 0.0233 | 2.7 | 0.19 | 148.5 | 4.0 | 100.1 | 13.3 | NA    | NA    | 148.5 | 4.0 |
| Nizina-Spot 314 | 255  | 5164   | 2.2  | 20.7512 | 1.8  | 0.1548 | 3.7  | 0.0233 | 3.2 | 0.87 | 148.5 | 4.7 | 146.1 | 5.0  | 108.6 | 43.5  | 148.5 | 4.7 |
| Nizina-Spot 118 | 303  | 18642  | 3.5  | 20.1210 | 1.7  | 0.1597 | 3.5  | 0.0233 | 3.0 | 0.88 | 148.6 | 4.5 | 150.4 | 4.8  | 180.9 | 38.5  | 148.6 | 4.5 |
| Nizina-Spot 211 | 99   | 10843  | 1.9  | 19.9460 | 2.7  | 0.1611 | 4.3  | 0.0233 | 3.3 | 0.77 | 148.6 | 4.8 | 151.7 | 6.0  | 201.2 | 63.8  | 148.6 | 4.8 |
| Nizina-Spot 235 | 136  | 40772  | 1.5  | 19.8822 | 1.8  | 0.1617 | 3.7  | 0.0233 | 3.3 | 0.88 | 148.7 | 4.8 | 152.2 | 5.3  | 208.7 | 41.1  | 148.7 | 4.8 |
| Nizina-Spot 141 | 131  | 27796  | 2.9  | 20.3037 | 1.9  | 0.1584 | 3.8  | 0.0233 | 3.3 | 0.86 | 148.7 | 4.8 | 149.3 | 5.3  | 159.9 | 45.4  | 148.7 | 4.8 |
| Nizina-Spot 33  | 353  | 8076   | 2.5  | 20.8894 | 2.4  | 0.1540 | 3.5  | 0.0233 | 2.5 | 0.71 | 148.8 | 3.6 | 145.5 | 4.7  | 92.9  | 58.0  | 148.8 | 3.6 |
| Nizina-Spot 202 | 203  | 17724  | 2.7  | 19.6105 | 2.0  | 0.1643 | 3.4  | 0.0234 | 2.8 | 0.82 | 149.0 | 4.2 | 154.5 | 4.9  | 240.5 | 45.3  | 149.0 | 4.2 |
| Nizina-Spot 222 | 450  | 9646   | 19.8 | 20.7523 | 1.7  | 0.1555 | 3.1  | 0.0234 | 2.6 | 0.84 | 149.2 | 3.9 | 146.7 | 4.2  | 108.5 | 39.6  | 149.2 | 3.9 |
| Nizina-Spot 173 | 67   | 4927   | 2.4  | 20.4841 | 3.0  | 0.1577 | 4.2  | 0.0234 | 3.0 | 0.70 | 149.3 | 4.4 | 148.7 | 5.9  | 139.1 | 70.7  | 149.3 | 4.4 |
| Nizina-Spot 184 | 194  | 71977  | 3.7  | 20.7712 | 1.9  | 0.1557 | 3.1  | 0.0235 | 2.5 | 0.80 | 149.5 | 3.7 | 146.9 | 4.3  | 106.3 | 44.6  | 149.5 | 3.7 |
| Nizina-Spot 17  | 760  | 76806  | 23.3 | 20.5667 | 1.2  | 0.1573 | 2.9  | 0.0235 | 2.7 | 0.92 | 149.6 | 4.0 | 148.3 | 4.0  | 129.7 | 27.2  | 149.6 | 4.0 |
| Nizina-Spot 195 | 227  | 10623  | 2.5  | 20.1493 | 1.6  | 0.1606 | 3.7  | 0.0235 | 3.3 | 0.90 | 149.6 | 4.9 | 151.2 | 5.2  | 177.7 | 37.0  | 149.6 | 4.9 |
| Nizina-Spot 284 | 133  | 11765  | 1.9  | 20.9544 | 2.0  | 0.1546 | 3.1  | 0.0235 | 2.4 | 0.77 | 149.8 | 3.6 | 146.0 | 4.3  | 85.6  | 47.2  | 149.8 | 3.6 |
| Nizina-Spot 41  | 545  | 21242  | 18.7 | 20.1490 | 1.3  | 0.1608 | 3.0  | 0.0235 | 2.7 | 0.90 | 149.8 | 4.0 | 151.4 | 4.2  | 177.7 | 29.8  | 149.8 | 4.0 |
| Nizina-Spot 38  | 220  | 6106   | 2.2  | 20.9800 | 2.1  | 0.1545 | 3.8  | 0.0235 | 3.2 | 0.84 | 149.8 | 4.7 | 145.8 | 5.2  | 82.6  | 50.1  | 149.8 | 4.7 |
| Nizina-Spot 49  | 114  | 15304  | 2.9  | 20.2184 | 2.2  | 0.1603 | 4.0  | 0.0235 | 3.3 | 0.83 | 149.9 | 4.9 | 151.0 | 5.6  | 169.7 | 51.3  | 149.9 | 4.9 |
| Nizina-Spot 32  | 267  | 24469  | 2.5  | 20.6456 | 1.7  | 0.1571 | 3.6  | 0.0235 | 3.1 | 0.88 | 149.9 | 4.6 | 148.1 | 4.9  | 120.7 | 39.7  | 149.9 | 4.6 |
| Nizina-Spot 229 | 78   | 1580   | 2.8  | 25.9420 | 3.5  | 0.1250 | 4.8  | 0.0235 | 3.2 | 0.67 | 149.9 | 4.7 | 119.6 | 5.4  | NA    | NA    | 149.9 | 4.7 |
| Nizina-Spot 302 | 97   | 2071   | 2.4  | 22.2619 | 5.9  | 0.1458 | 6.7  | 0.0235 | 3.1 | 0.46 | 150.0 | 4.6 | 138.2 | 8.6  | NA    | NA    | 150.0 | 4.6 |
| Nizina-Spot 221 | 72   | 2487   | 2.2  | 20.3466 | 3.5  | 0.1597 | 4.8  | 0.0236 | 3.2 | 0.67 | 150.2 | 4.8 | 150.4 | 6.7  | 154.9 | 83.1  | 150.2 | 4.8 |
| Nizina-Spot 288 | 188  | 52849  | 2.8  | 20.3210 | 1.9  | 0.1599 | 3.5  | 0.0236 | 2.9 | 0.83 | 150.3 | 4.4 | 150.7 | 4.9  | 157.9 | 45.6  | 150.3 | 4.4 |
| Nizina-Spot 275 | 264  | 25668  | 2.6  | 20.0884 | 1.7  | 0.1618 | 3.1  | 0.0236 | 2.6 | 0.85 | 150.3 | 3.9 | 152.3 | 4.4  | 184.7 | 38.8  | 150.3 | 3.9 |
| Nizina-Spot 294 | 113  | 8815   | 2.7  | 21.2039 | 2.7  | 0.1533 | 3.8  | 0.0236 | 2.7 | 0.71 | 150.3 | 4.0 | 144.8 | 5.2  | 57.4  | 64.5  | 150.3 | 4.0 |
| Nizina-Spot 66  | 1339 | 39000  | 13.0 | 20.4982 | 1.4  | 0.1587 | 3.6  | 0.0236 | 3.3 | 0.91 | 150.3 | 4.8 | 149.5 | 4.9  | 137.5 | 34.0  | 150.3 | 4.8 |
| Nizina-Spot 52  | 277  | 266966 | 5.6  | 20.4810 | 1.6  | 0.1588 | 4.1  | 0.0236 | 3.7 | 0.92 | 150.4 | 5.5 | 149.7 | 5.6  | 139.5 | 37.8  | 150.4 | 5.5 |
| Nizina-Spot 203 | 833  | 61272  | 24.2 | 20.3488 | 1.4  | 0.1599 | 3.2  | 0.0236 | 2.9 | 0.90 | 150.4 | 4.3 | 150.6 | 4.5  | 154.7 | 32.6  | 150.4 | 4.3 |
| Nizina-Spot 115 | 428  | 758984 | 43.0 | 19.8161 | 1.6  | 0.1642 | 3.1  | 0.0236 | 2.6 | 0.85 | 150.5 | 3.9 | 154.4 | 4.4  | 216.4 | 37.8  | 150.5 | 3.9 |
| Nizina-Spot 187 | 127  | 11651  | 2.4  | 20.4397 | 2.0  | 0.1593 | 3.8  | 0.0236 | 3.2 | 0.85 | 150.5 | 4.8 | 150.1 | 5.3  | 144.2 | 47.1  | 150.5 | 4.8 |
| Nizina-Spot 194 | 153  | 7251   | 1.4  | 21.3710 | 2.3  | 0.1524 | 3.9  | 0.0236 | 3.1 | 0.80 | 150.6 | 4.6 | 144.0 | 5.2  | 38.6  | 56.1  | 150.6 | 4.6 |
| Nizina-Spot 300 | 428  | 15381  | 37.0 | 20.3485 | 1.5  | 0.1602 | 4.0  | 0.0237 | 3.7 | 0.93 | 150.7 | 5.5 | 150.9 | 5.6  | 154.7 | 35.1  | 150.7 | 5.5 |
| Nizina-Spot 255 | 475  | 54542  | 1.3  | 20.5465 | 1.2  | 0.1587 | 2.7  | 0.0237 | 2.4 | 0.89 | 150.7 | 3.6 | 149.6 | 3.7  | 132.0 | 28.8  | 150.7 | 3.6 |
| Nizina-Spot 190 | 687  | 46145  | 21.1 | 20.4008 | 1.5  | 0.1599 | 3.3  | 0.0237 | 2.9 | 0.89 | 150.8 | 4.3 | 150.6 | 4.6  | 148.7 | 35.3  | 150.8 | 4.3 |
| Nizina-Spot 91  | 159  | 4113   | 1.5  | 21.1157 | 1.9  | 0.1545 | 3.3  | 0.0237 | 2.7 | 0.82 | 150.9 | 4.0 | 145.9 | 4.5  | 67.3  | 45.0  | 150.9 | 4.0 |
| Nizina-Spot 135 | 65   | 948    | 1.5  | 30.3593 | 3.4  | 0.1075 | 4.2  | 0.0237 | 2.5 | 0.58 | 150.9 | 3.7 | 103.7 | 4.2  | NA    | NA    | 150.9 | 3.7 |
| Nizina-Spot 94  | 103  | 2811   | 2.8  | 21.2739 | 2.3  | 0.1535 | 3.4  | 0.0237 | 2.5 | 0.74 | 151.0 | 3.8 | 145.0 | 4.6  | 49.6  | 54.7  | 151.0 | 3.8 |
| Nizina-Spot 24  | 694  | 95908  | 16.4 | 20.7523 | 1.4  | 0.1574 | 3.2  | 0.0237 | 2.8 | 0.89 | 151.0 | 4.2 | 148.4 | 4.4  | 108.5 | 33.8  | 151.0 | 4.2 |
| Nizina-Spot 256 | 163  | 12447  | 1.8  | 19.5545 | 1.9  | 0.1671 | 3.5  | 0.0237 | 2.9 | 0.83 | 151.0 | 4.3 | 156.9 | 5.0  | 247.1 | 44.6  | 151.0 | 4.3 |
| Nizina-Spot 309 | 134  | 5651   | 2.5  | 21.1322 | 2.8  | 0.1550 | 4.7  | 0.0238 | 3.8 | 0.81 | 151.4 | 5.7 | 146.3 | 6.4  | 65.5  | 66.1  | 151.4 | 5.7 |
| Nizina-Spot 146 | 745  | 11222  | 24.9 | 21.0094 | 1.5  | 0.1559 | 3.6  | 0.0238 | 3.3 | 0.91 | 151.4 | 5.0 | 147.1 | 5.0  | 79.3  | 35.2  | 151.4 | 5.0 |
| Nizina-Spot 110 | 99   | 3317   | 2.5  | 21.4788 | 2.1  | 0.1526 | 3.2  | 0.0238 | 2.4 | 0.75 | 151.5 | 3.5 | 144.2 | 4.2  | 26.6  | 50.2  | 151.5 | 3.5 |
| Nizina-Spot 73  | 566  | 37456  | 19.0 | 20.0151 | 1.2  | 0.1639 | 3.2  | 0.0238 | 2.9 | 0.92 | 151.6 | 4.4 | 154.1 | 4.5  | 193.3 | 28.1  | 151.6 | 4.4 |
| Nizina-Spot 259 | 624  | 40144  | 17.1 | 20.1822 | 1.1  | 0.1626 | 2.7  | 0.0238 | 2.4 | 0.91 | 151.7 | 3.7 | 152.9 | 3.8  | 173.9 | 25.8  | 151.7 | 3.7 |
| Nizina-Spot 43  | 265  | 3842   | 5.1  | 21.1758 | 1.6  | 0.1553 | 3.5  | 0.0239 | 3.1 | 0.89 | 152.0 |     |       |      |       |       |       |     |

|                 |      |        |      |         |     |        |      |        |     |      |       |     |       |      |        |       |       |     |
|-----------------|------|--------|------|---------|-----|--------|------|--------|-----|------|-------|-----|-------|------|--------|-------|-------|-----|
| Nizina-Spot 262 | 383  | 7812   | 2.8  | 20.0006 | 1.3 | 0.1657 | 2.8  | 0.0241 | 2.5 | 0.89 | 153.2 | 3.8 | 155.7 | 4.1  | 194.9  | 29.4  | 153.2 | 3.8 |
| Nizina-Spot 50  | 224  | 8344   | 2.4  | 21.0065 | 2.1 | 0.1578 | 3.1  | 0.0241 | 2.3 | 0.75 | 153.2 | 3.5 | 148.8 | 4.3  | 79.6   | 49.0  | 153.2 | 3.5 |
| Nizina-Spot 109 | 92   | 1672   | 2.4  | 25.8339 | 4.6 | 0.1284 | 5.4  | 0.0241 | 2.8 | 0.53 | 153.3 | 4.3 | 122.6 | 6.2  | NA     | NA    | 153.3 | 4.3 |
| Nizina-Spot 116 | 89   | 4045   | 3.1  | 20.4506 | 2.6 | 0.1622 | 4.1  | 0.0241 | 3.1 | 0.77 | 153.3 | 4.7 | 152.6 | 5.8  | 143.0  | 61.3  | 153.3 | 4.7 |
| Nizina-Spot 179 | 973  | 59712  | 1.8  | 19.8891 | 1.1 | 0.1668 | 2.9  | 0.0241 | 2.7 | 0.93 | 153.3 | 4.0 | 156.6 | 4.2  | 207.9  | 25.2  | 153.3 | 4.0 |
| Nizina-Spot 308 | 160  | 4455   | 5.0  | 20.4972 | 2.6 | 0.1620 | 3.8  | 0.0241 | 2.7 | 0.72 | 153.5 | 4.1 | 152.5 | 5.3  | 137.6  | 60.7  | 153.5 | 4.1 |
| Nizina-Spot 188 | 166  | 15190  | 2.5  | 20.5658 | 2.0 | 0.1615 | 3.1  | 0.0241 | 2.4 | 0.76 | 153.5 | 3.6 | 152.0 | 4.4  | 129.8  | 47.7  | 153.5 | 3.6 |
| Nizina-Spot 226 | 962  | 67989  | 24.4 | 20.0641 | 1.2 | 0.1656 | 2.8  | 0.0241 | 2.5 | 0.90 | 153.6 | 3.8 | 155.6 | 4.0  | 187.5  | 28.6  | 153.6 | 3.8 |
| Nizina-Spot 156 | 97   | 4123   | 2.3  | 21.8971 | 3.0 | 0.1519 | 4.4  | 0.0241 | 3.2 | 0.74 | 153.7 | 4.9 | 143.5 | 5.9  | NA     | NA    | 153.7 | 4.9 |
| Nizina-Spot 93  | 482  | 661549 | 18.2 | 19.8673 | 1.3 | 0.1675 | 2.4  | 0.0241 | 2.0 | 0.83 | 153.8 | 3.0 | 157.2 | 3.5  | 210.4  | 31.0  | 153.8 | 3.0 |
| Nizina-Spot 4   | 279  | 25986  | 1.9  | 20.6005 | 1.7 | 0.1616 | 3.3  | 0.0241 | 2.8 | 0.85 | 153.8 | 4.3 | 152.1 | 4.7  | 125.8  | 40.5  | 153.8 | 4.3 |
| Nizina-Spot 189 | 725  | 72800  | 24.8 | 20.1492 | 1.4 | 0.1654 | 3.0  | 0.0242 | 2.6 | 0.88 | 154.1 | 4.0 | 155.4 | 4.3  | 177.7  | 32.6  | 154.1 | 4.0 |
| Nizina-Spot 163 | 451  | 95592  | 3.3  | 20.4598 | 1.2 | 0.1630 | 2.8  | 0.0242 | 2.5 | 0.90 | 154.1 | 3.8 | 153.3 | 4.0  | 141.9  | 29.1  | 154.1 | 3.8 |
| Nizina-Spot 273 | 302  | 11788  | 1.9  | 20.5916 | 2.0 | 0.1620 | 3.7  | 0.0242 | 3.1 | 0.84 | 154.2 | 4.8 | 152.4 | 5.3  | 126.8  | 47.0  | 154.2 | 4.8 |
| Nizina-Spot 147 | 138  | 5437   | 2.2  | 21.2406 | 3.6 | 0.1571 | 4.5  | 0.0242 | 2.7 | 0.60 | 154.2 | 4.1 | 148.2 | 6.2  | 53.2   | 85.9  | 154.2 | 4.1 |
| Nizina-Spot 233 | 247  | 8407   | 2.1  | 18.0267 | 2.2 | 0.1851 | 3.3  | 0.0242 | 2.5 | 0.75 | 154.2 | 3.8 | 172.5 | 5.2  | 431.3  | 48.2  | 154.2 | 3.8 |
| Nizina-Spot 274 | 213  | 31526  | 4.3  | 18.6664 | 2.2 | 0.1789 | 4.2  | 0.0242 | 3.6 | 0.86 | 154.3 | 5.4 | 167.1 | 6.4  | 353.1  | 48.7  | 154.3 | 5.4 |
| Nizina-Spot 70  | 265  | 13145  | 1.4  | 19.7400 | 1.9 | 0.1692 | 3.5  | 0.0242 | 2.9 | 0.83 | 154.4 | 4.4 | 158.8 | 5.1  | 225.3  | 44.7  | 154.4 | 4.4 |
| Nizina-Spot 107 | 318  | 49727  | 6.3  | 20.4812 | 1.9 | 0.1632 | 3.7  | 0.0242 | 3.2 | 0.86 | 154.5 | 4.8 | 153.5 | 5.2  | 139.4  | 44.2  | 154.5 | 4.8 |
| Nizina-Spot 79  | 125  | 3239   | 2.7  | 14.0613 | 4.8 | 0.2377 | 5.7  | 0.0243 | 3.1 | 0.53 | 154.5 | 4.7 | 216.5 | 11.2 | 960.8  | 98.8  | 154.5 | 4.7 |
| Nizina-Spot 113 | 533  | 60467  | 2.2  | 19.8796 | 1.6 | 0.1682 | 3.0  | 0.0243 | 2.6 | 0.85 | 154.5 | 3.9 | 157.8 | 4.4  | 209.0  | 37.2  | 154.5 | 3.9 |
| Nizina-Spot 34  | 116  | 4043   | 3.1  | 20.9172 | 2.4 | 0.1599 | 4.1  | 0.0243 | 3.3 | 0.80 | 154.6 | 5.0 | 150.6 | 5.7  | 89.8   | 57.8  | 154.6 | 5.0 |
| Nizina-Spot 182 | 105  | 174334 | 2.1  | 19.6036 | 2.5 | 0.1707 | 3.6  | 0.0243 | 2.6 | 0.73 | 154.6 | 4.0 | 160.0 | 5.4  | 241.3  | 57.7  | 154.6 | 4.0 |
| Nizina-Spot 75  | 350  | 10633  | 6.8  | 20.4450 | 1.8 | 0.1637 | 3.1  | 0.0243 | 2.5 | 0.82 | 154.7 | 3.8 | 153.9 | 4.4  | 143.6  | 41.3  | 154.7 | 3.8 |
| Nizina-Spot 122 | 485  | 25102  | 2.9  | 20.5999 | 1.6 | 0.1625 | 3.1  | 0.0243 | 2.6 | 0.85 | 154.7 | 4.0 | 152.9 | 4.4  | 125.8  | 38.3  | 154.7 | 4.0 |
| Nizina-Spot 296 | 113  | 13730  | 3.3  | 19.9046 | 2.6 | 0.1683 | 4.1  | 0.0243 | 3.2 | 0.78 | 154.8 | 4.9 | 157.9 | 6.0  | 206.1  | 59.7  | 154.8 | 4.9 |
| Nizina-Spot 37  | 154  | 6726   | 1.6  | 21.3881 | 2.0 | 0.1568 | 4.3  | 0.0243 | 3.8 | 0.88 | 155.0 | 5.8 | 147.9 | 5.9  | 36.7   | 48.7  | 155.0 | 5.8 |
| Nizina-Spot 214 | 492  | 46609  | 13.0 | 20.5590 | 1.4 | 0.1631 | 3.0  | 0.0243 | 2.6 | 0.88 | 155.0 | 4.0 | 153.4 | 4.3  | 130.5  | 33.0  | 155.0 | 4.0 |
| Nizina-Spot 129 | 130  | 8140   | 2.6  | 15.8674 | 2.8 | 0.2114 | 4.5  | 0.0243 | 3.5 | 0.79 | 155.1 | 5.4 | 194.8 | 8.0  | 709.0  | 58.9  | 155.1 | 5.4 |
| Nizina-Spot 92  | 667  | 70153  | 21.8 | 20.4155 | 1.4 | 0.1645 | 2.9  | 0.0244 | 2.5 | 0.88 | 155.2 | 3.9 | 154.6 | 4.1  | 147.0  | 32.3  | 155.2 | 3.9 |
| Nizina-Spot 282 | 88   | 6361   | 2.1  | 19.0839 | 2.8 | 0.1761 | 4.3  | 0.0244 | 3.2 | 0.75 | 155.3 | 4.9 | 164.7 | 6.5  | 302.9  | 64.0  | 155.3 | 4.9 |
| Nizina-Spot 22  | 247  | 6214   | 2.7  | 20.9213 | 2.0 | 0.1610 | 3.9  | 0.0244 | 3.3 | 0.86 | 155.6 | 5.1 | 151.6 | 5.5  | 89.3   | 47.8  | 155.6 | 5.1 |
| Nizina-Spot 155 | 88   | 79529  | 2.3  | 19.4782 | 2.2 | 0.1730 | 3.3  | 0.0244 | 2.6 | 0.76 | 155.7 | 3.9 | 162.0 | 5.0  | 256.1  | 49.8  | 155.7 | 3.9 |
| Nizina-Spot 134 | 227  | 7249   | 1.5  | 21.0791 | 2.0 | 0.1599 | 3.7  | 0.0244 | 3.1 | 0.85 | 155.7 | 4.8 | 150.6 | 5.1  | 71.4   | 46.5  | 155.7 | 4.8 |
| Nizina-Spot 283 | 903  | 19640  | 6.0  | 20.6533 | 1.3 | 0.1636 | 3.1  | 0.0245 | 2.8 | 0.91 | 156.1 | 4.3 | 153.8 | 4.4  | 119.8  | 29.8  | 156.1 | 4.3 |
| Nizina-Spot 48  | 266  | 5839   | 2.8  | 20.7155 | 1.8 | 0.1635 | 3.1  | 0.0246 | 2.5 | 0.81 | 156.5 | 3.8 | 153.8 | 4.4  | 112.7  | 42.7  | 156.5 | 3.8 |
| Nizina-Spot 8   | 447  | 80279  | 40.8 | 20.8898 | 1.4 | 0.1622 | 3.4  | 0.0246 | 3.1 | 0.91 | 156.6 | 4.8 | 152.6 | 4.9  | 92.8   | 33.7  | 156.6 | 4.8 |
| Nizina-Spot 269 | 308  | 43968  | 2.5  | 19.8099 | 1.4 | 0.1711 | 2.8  | 0.0246 | 2.4 | 0.86 | 156.6 | 3.7 | 160.4 | 4.1  | 217.1  | 32.8  | 156.6 | 3.7 |
| Nizina-Spot 112 | 475  | 13703  | 2.5  | 20.2366 | 1.5 | 0.1682 | 2.9  | 0.0247 | 2.4 | 0.84 | 157.3 | 3.7 | 157.9 | 4.2  | 167.6  | 36.0  | 157.3 | 3.7 |
| Nizina-Spot 278 | 128  | 16227  | 1.9  | 19.9123 | 2.2 | 0.1714 | 4.1  | 0.0248 | 3.5 | 0.85 | 157.7 | 5.5 | 160.6 | 6.1  | 205.2  | 50.0  | 157.7 | 5.5 |
| Nizina-Spot 153 | 167  | 3867   | 2.9  | 22.2504 | 2.2 | 0.1538 | 3.8  | 0.0248 | 3.2 | 0.82 | 158.1 | 4.9 | 145.2 | 5.2  | NA     | NA    | 158.1 | 4.9 |
| Nizina-Spot 245 | 366  | 31342  | 1.4  | 20.6690 | 1.4 | 0.1656 | 3.2  | 0.0248 | 2.9 | 0.90 | 158.2 | 4.5 | 155.6 | 4.7  | 118.0  | 33.8  | 158.2 | 4.5 |
| Nizina-Spot 303 | 505  | 15566  | 12.8 | 15.4909 | 1.7 | 0.2212 | 3.0  | 0.0249 | 2.5 | 0.83 | 158.3 | 3.9 | 202.9 | 5.6  | 759.8  | 35.4  | 158.3 | 3.9 |
| Nizina-Spot 295 | 303  | 23763  | 3.4  | 20.1775 | 1.7 | 0.1698 | 3.3  | 0.0249 | 2.9 | 0.85 | 158.3 | 4.5 | 159.3 | 4.9  | 174.4  | 40.6  | 158.3 | 4.5 |
| Nizina-Spot 171 | 262  | 7949   | 2.2  | 20.6883 | 1.4 | 0.1657 | 3.5  | 0.0249 | 3.2 | 0.92 | 158.4 | 5.0 | 155.7 | 5.0  | 115.8  | 32.6  | 158.4 | 5.0 |
| Nizina-Spot 191 | 266  | 4811   | 2.5  | 19.2804 | 2.2 | 0.1794 | 3.6  | 0.0251 | 2.8 | 0.79 | 159.8 | 4.5 | 167.5 | 5.5  | 279.5  | 50.2  | 159.8 | 4.5 |
| Nizina-Spot 248 | 664  | 3920   | 16.5 | 11.6021 | 9.5 | 0.2982 | 10.1 | 0.0251 | 3.4 | 0.34 | 159.8 | 5.3 | 265.0 | 23.5 | 1342.5 | 183.4 | 159.8 | 5.3 |
| Nizina-Spot 161 | 224  | 13108  | 2.4  | 19.0415 | 2.0 | 0.1831 | 3.7  | 0.0253 | 3.1 | 0.85 | 161.0 | 5.0 | 170.7 | 5.8  | 308.0  | 44.9  | 161.0 | 5.0 |
| Nizina-Spot 234 | 237  | 16324  | 3.3  | 20.1357 | 1.8 | 0.1732 | 4.0  | 0.0253 | 3.6 | 0.89 | 161.1 | 5.7 | 162.2 | 6.0  | 179.2  | 42.2  | 161.1 | 5.7 |
| Nizina-Spot 44  | 195  | 5840   | 3.0  | 22.1411 | 3.4 | 0.1577 | 4.7  | 0.0253 | 3.2 | 0.69 | 161.3 | 5.2 | 148.7 | 6.5  | NA     | NA    | 161.3 | 5.2 |
| Nizina-Spot 301 | 71   | 3902   | 2.9  | 20.7193 | 2.7 | 0.1685 | 4.1  | 0.0253 | 3.1 | 0.75 | 161.3 | 4.9 | 158.1 | 6.0  | 112.3  | 63.3  | 161.3 | 4.9 |
| Nizina-Spot 11  | 341  | 6552   | 2.5  | 20.9316 | 2.1 | 0.1677 | 4.0  | 0.0255 | 3.4 | 0.86 | 162.2 | 5.5 | 157.5 | 5.8  | 88.1   | 49.1  | 162.2 | 5.5 |
| Nizina-Spot 154 | 381  | 32409  | 2.3  | 20.5501 | 1.4 | 0.1714 | 3.0  | 0.0256 | 2.6 | 0.88 | 162.7 | 4.2 | 160.6 | 4.4  | 131.6  | 33.3  | 162.7 | 4.2 |
| Nizina-Spot 201 | 344  | 12586  | 2.2  | 20.8286 | 1.2 | 0.1710 | 3.0  | 0.0258 | 2.7 | 0.91 | 164.5 | 4.4 | 160.3 | 4.4  | 99.8   | 29.4  | 164.5 | 4.4 |
| Nizina-Spot 69  | 182  | 8106   | 3.1  | 20.8905 | 2.7 | 0.1707 | 3.9  | 0.0259 | 2.8 | 0.72 | 164.7 | 4.5 | 160.1 | 5.7  | 92.8   | 63.9  | 164.7 | 4.5 |
| Nizina-Spot 84  | 347  | 5154   | 2.3  | 21.5914 | 1.6 | 0.1661 | 3.4  | 0.0260 | 3.0 | 0.88 | 165.6 | 5.0 | 156.0 | 5.0  | 14.0   | 38.4  | 165.6 | 5.0 |
| Nizina-Spot 143 | 171  | 9587   | 3.1  | 19.5522 | 2.0 | 0.1834 | 3.8  | 0.0260 | 3.2 | 0.85 | 165.6 | 5.2 | 171.0 | 5.9  | 247.4  | 46.2  | 165.6 | 5.2 |
| Nizina-Spot 103 | 513  | 33870  | 3.7  | 20.0236 | 1.4 | 0.1823 | 3.8  | 0.0265 | 3.5 | 0.92 | 168.5 | 5.8 | 170.0 | 5.9  | 192.3  | 33.5  | 168.5 | 5.8 |
| Nizina-Spot 312 | 316  | 18791  | 1.8  | 20.6156 | 1.7 | 0.1774 | 3.3  | 0.0265 | 2.8 | 0.86 | 168.9 | 4.7 | 165.8 | 5.1  | 124.0  | 40.2  | 168.9 | 4.7 |
| Nizina-Spot 260 | 518  | 9636   | 3.6  | 20.5653 | 1.4 | 0.1829 | 3.0  | 0.0273 | 2.7 | 0.89 | 173.6 | 4.6 | 170.5 | 4.8  | 129.8  | 32.5  | 173.6 | 4.6 |
| Nizina-Spot 192 | 322  | 20159  | 1.7  | 19.6475 | 1.8 | 0.2035 | 3.6  | 0.0290 | 3.1 | 0.87 | 184.4 | 5.7 | 188.1 | 6.2  | 236.2  | 40.4  | 184.4 | 5.7 |
| Nizina-Spot 292 | 517  | 255437 | 2.3  | 18.7311 | 1.4 | 0.3248 | 2.9  | 0.0441 | 2.6 | 0.88 | 278.5 | 7.1 | 285.6 | 7.3  | 345.3  | 31.0  | 278.5 | 7.1 |
| Nizina-Spot 254 | 1154 | 27762  | 3.6  | 18.7924 | 1.4 | 0.3244 | 3.3  | 0.0442 | 3.0 | 0.91 | 279.0 | 8.3 | 285.3 | 8.3  | 337.9  | 31.5  | 279.0 | 8.3 |
| Nizina-Spot 263 | 194  | 9342   | 4.0  | 19.3840 | 2.4 | 0.3206 | 3.8  | 0.0451 | 3.0 | 0.78 | 284.3 | 8.3 | 282.4 | 9.4  | 267.2  | 54.2  | 284.3 | 8.3 |
| Nizina-Spot 105 | 1220 | 126272 | 3.5  | 19.1095 | 0.9 | 0.3298 | 2.7  | 0.0457 | 2.5 | 0.94 | 288.2 | 7.1 | 289.4 | 6.8  | 299.8  | 21.5  | 288.2 | 7.1 |
| Nizina-Spot 149 | 490  | 61733  | 2.5  | 19.1680 | 1.6 | 0.3325 | 3.3  | 0.0462 | 2.9 | 0.88 | 291.4 | 8.3 | 291.5 | 8.4  | 292.9  | 36.4  | 291.4 | 8.3 |
| Nizina-Spot 175 | 119  | 54786  | 2.0  | 18.9385 | 1.8 | 0.3368 | 3.2  | 0.0463 | 2.7 | 0.83 | 291.6 | 7.6 | 294.7 | 8.2  | 320.3  | 40.7  | 291.6 | 7.6 |
| Nizina-Spot 54  | 66   | 3952   | 2.8  | 21.0571 | 3.7 | 0.3034 | 4.5  | 0.0464 | 2.5 | 0.56 | 292.1 | 7.2 | 269.0 | 10.6 | 73.9   | 88.8  | 292.1 |     |

|                    |      |         |     |           |       |         |       |        |     |      |        |      |        |      |        |        |        |      |
|--------------------|------|---------|-----|-----------|-------|---------|-------|--------|-----|------|--------|------|--------|------|--------|--------|--------|------|
| Nizina-Spot 240    | 660  | 30221   | 3.1 | 19.2683   | 1.2   | 0.3464  | 3.6   | 0.0484 | 3.4 | 0.94 | 304.9  | 10.2 | 302.0  | 9.5  | 281.0  | 28.2   | 304.9  | 10.2 |
| Nizina-Spot 251    | 858  | 65535   | 3.1 | 18.9612   | 1.2   | 0.3553  | 2.3   | 0.0489 | 1.9 | 0.84 | 307.7  | 5.8  | 308.7  | 6.1  | 317.6  | 28.2   | 307.7  | 5.8  |
| Nizina-Spot 123    | 818  | 253246  | 3.4 | 19.0711   | 1.0   | 0.3572  | 2.9   | 0.0494 | 2.8 | 0.94 | 311.0  | 8.3  | 310.1  | 7.8  | 304.4  | 22.2   | 311.0  | 8.3  |
| Nizina-Spot 57     | 473  | 19436   | 2.7 | 19.4515   | 1.3   | 0.3514  | 3.2   | 0.0496 | 2.9 | 0.91 | 312.0  | 8.7  | 305.7  | 8.3  | 259.2  | 29.9   | 312.0  | 8.7  |
| Nizina-Spot 193    | 515  | 67124   | 2.7 | 18.8944   | 1.6   | 0.3622  | 3.4   | 0.0497 | 2.9 | 0.88 | 312.4  | 9.0  | 313.8  | 9.1  | 325.6  | 36.6   | 312.4  | 9.0  |
| Nizina-Spot 10     | 367  | 56625   | 1.5 | 17.8954   | 1.2   | 0.5377  | 3.0   | 0.0698 | 2.8 | 0.92 | 435.0  | 11.7 | 436.9  | 10.7 | 447.6  | 25.7   | 435.0  | 11.7 |
| Nizina-Spot 159    | 170  | 228239  | 1.3 | 17.1713   | 1.2   | 0.6607  | 3.5   | 0.0823 | 3.3 | 0.94 | 510.0  | 16.4 | 515.1  | 14.3 | 538.7  | 25.4   | 510.0  | 16.4 |
| Nizina-Spot 307    | 224  | 40448   | 1.7 | 16.9572   | 1.2   | 0.7097  | 3.1   | 0.0873 | 2.9 | 0.93 | 539.7  | 14.8 | 544.6  | 13.0 | 566.1  | 25.5   | 539.7  | 14.8 |
| Nizina-Spot 95     | 68   | 54593   | 0.9 | 13.0931   | 1.6   | 1.8748  | 3.2   | 0.1781 | 2.8 | 0.87 | 1056.6 | 26.9 | 1072.2 | 21.0 | 1104.9 | 31.3   | 1104.9 | 31.3 |
| Nizina-Spot 213    | 152  | 207269  | 1.8 | 10.8927   | 1.2   | 3.2212  | 3.3   | 0.2546 | 3.1 | 0.93 | 1462.1 | 40.1 | 1462.3 | 25.5 | 1463.3 | 22.8   | 1463.3 | 22.8 |
| Ptarmagin Creek    |      |         |     |           |       |         |       |        |     |      |        |      |        |      |        |        |        |      |
| Ptarmagin-Spot 293 | 352  | 348     | 1.6 | 45.3457   | 102.8 | 0.0032  | 102.9 | 0.0010 | 4.0 | 0.04 | 6.7    | 0.3  | 3.2    | 3.3  | 2228.1 | 0.0    | 6.7    | 0.3  |
| Ptarmagin-Spot 288 | 264  | 109     | 1.6 | -15.0251  | 4.9   | -0.0100 | 6.8   | 0.0011 | 4.8 | 0.70 | 7.1    | 0.3  | 10.3   | 0.7  | 0.0    | 0.0    | 7.1    | 0.3  |
| Ptarmagin-Spot 122 | 424  | 766     | 2.5 | 39.1376   | 39.9  | 0.0047  | 40.1  | 0.0013 | 3.8 | 0.10 | 8.6    | 0.3  | 4.8    | 1.9  | 1682.5 | 1428.8 | 8.6    | 0.3  |
| Ptarmagin-Spot 270 | 141  | 1357    | 2.6 | 26.2633   | 14.1  | 0.0077  | 15.2  | 0.0015 | 5.6 | 0.37 | 9.4    | 0.5  | 7.8    | 1.2  | 479.9  | 375.3  | 9.4    | 0.5  |
| Ptarmagin-Spot 14  | 418  | 5570    | 3.1 | 21.2138   | 2.9   | 0.0201  | 4.0   | 0.0031 | 2.7 | 0.68 | 19.9   | 0.5  | 20.2   | 0.8  | 56.3   | 69.2   | 19.9   | 0.5  |
| Ptarmagin-Spot 271 | 4128 | 14072   | 0.8 | 21.5464   | 1.0   | 0.0205  | 1.9   | 0.0032 | 1.7 | 0.87 | 20.6   | 0.3  | 20.6   | 0.4  | 19.1   | 22.9   | 20.6   | 0.3  |
| Ptarmagin-Spot 9   | 219  | 480     | 2.0 | 65.0440   | 54.9  | 0.0068  | 55.0  | 0.0032 | 3.4 | 0.06 | 20.6   | 0.7  | 6.9    | 3.8  | 0.0    | 390.8  | 20.6   | 0.7  |
| Ptarmagin-Spot 174 | 234  | 1284    | 2.6 | 26.6333   | 16.2  | 0.0169  | 16.6  | 0.0033 | 3.6 | 0.22 | 21.0   | 0.8  | 17.0   | 2.8  | 517.1  | 434.7  | 21.0   | 0.8  |
| Ptarmagin-Spot 177 | 114  | 531     | 2.7 | 47.6781   | 16.7  | 0.0094  | 17.3  | 0.0033 | 4.8 | 0.27 | 21.0   | 1.0  | 9.5    | 1.6  | 2432.1 | 699.0  | 21.0   | 1.0  |
| Ptarmagin-Spot 129 | 170  | 1012    | 1.8 | 32.9509   | 5.9   | 0.0137  | 7.5   | 0.0033 | 4.6 | 0.61 | 21.1   | 1.0  | 13.8   | 1.0  | 1123.6 | 180.6  | 21.1   | 1.0  |
| Ptarmagin-Spot 56  | 187  | 15429   | 2.2 | 19.5722   | 4.9   | 0.0232  | 6.2   | 0.0033 | 3.8 | 0.62 | 21.2   | 0.8  | 23.2   | 1.4  | 245.0  | 112.8  | 21.2   | 0.8  |
| Ptarmagin-Spot 30  | 255  | 2823    | 2.4 | 23.7565   | 3.8   | 0.0191  | 5.0   | 0.0033 | 3.3 | 0.65 | 21.2   | 0.7  | 19.2   | 0.9  | 220.9  | 95.0   | 21.2   | 0.7  |
| Ptarmagin-Spot 315 | 94   | 220     | 2.4 | -66.8579  | 16.7  | -0.0068 | 17.5  | 0.0033 | 5.3 | 0.30 | 21.3   | 1.1  | 7.0    | 1.2  | 0.0    | 0.0    | 21.3   | 1.1  |
| Ptarmagin-Spot 279 | 165  | 1200    | 3.1 | 14.3602   | 7.5   | 0.0325  | 8.4   | 0.0034 | 3.8 | 0.45 | 21.8   | 0.8  | 32.5   | 2.7  | 917.7  | 154.6  | 21.8   | 0.8  |
| Ptarmagin-Spot 141 | 221  | 4656    | 2.3 | 23.6966   | 3.9   | 0.0198  | 4.7   | 0.0034 | 2.6 | 0.56 | 21.9   | 0.6  | 19.9   | 0.9  | 214.5  | 97.8   | 21.9   | 0.6  |
| Ptarmagin-Spot 193 | 181  | 208     | 1.9 | 29.6108   | 7.3   | 0.0160  | 8.4   | 0.0034 | 4.2 | 0.50 | 22.1   | 0.9  | 16.1   | 1.3  | 809.1  | 208.3  | 22.1   | 0.9  |
| Ptarmagin-Spot 202 | 199  | 460     | 2.7 | 17.1869   | 28.1  | 0.0279  | 28.4  | 0.0035 | 3.8 | 0.13 | 22.4   | 0.8  | 28.0   | 7.8  | 536.7  | 627.3  | 22.4   | 0.8  |
| Ptarmagin-Spot 128 | 187  | 342     | 2.6 | 375.7812  | 73.4  | 0.0013  | 73.6  | 0.0036 | 4.5 | 0.06 | 22.9   | 1.0  | 1.3    | 1.0  | 0.0    | 0.0    | 22.9   | 1.0  |
| Ptarmagin-Spot 247 | 90   | 184     | 4.3 | 88.0035   | 133.1 | 0.0056  | 133.3 | 0.0036 | 5.4 | 0.04 | 22.9   | 1.2  | 5.7    | 7.5  | 0.0    | 0.0    | 22.9   | 1.2  |
| Ptarmagin-Spot 191 | 97   | 571     | 3.7 | 45.5634   | 62.1  | 0.0109  | 62.3  | 0.0036 | 4.8 | 0.08 | 23.1   | 1.1  | 11.0   | 6.8  | 2247.1 | 264.6  | 23.1   | 1.1  |
| Ptarmagin-Spot 114 | 486  | 3187    | 1.7 | 22.9672   | 4.7   | 0.0223  | 5.9   | 0.0037 | 3.5 | 0.60 | 23.9   | 0.8  | 22.4   | 1.3  | 136.6  | 115.8  | 23.9   | 0.8  |
| Ptarmagin-Spot 241 | 132  | 267     | 2.7 | -144.2983 | 113.9 | -0.0036 | 114.0 | 0.0037 | 4.4 | 0.04 | 24.0   | 1.0  | 3.6    | 4.1  | 0.0    | 90.0   | 24.0   | 1.0  |
| Ptarmagin-Spot 221 | 262  | 1387    | 2.7 | 30.2310   | 9.8   | 0.0173  | 10.3  | 0.0038 | 3.4 | 0.33 | 24.4   | 0.8  | 17.4   | 1.8  | 868.4  | 282.0  | 24.4   | 0.8  |
| Ptarmagin-Spot 69  | 188  | 1129619 | 2.6 | 20.1586   | 4.3   | 0.0262  | 5.9   | 0.0038 | 4.0 | 0.68 | 24.6   | 1.0  | 26.2   | 1.5  | 176.6  | 100.7  | 24.6   | 1.0  |
| Ptarmagin-Spot 285 | 137  | 725     | 3.3 | 37.3400   | 32.6  | 0.0141  | 32.8  | 0.0038 | 3.9 | 0.12 | 24.6   | 1.0  | 14.3   | 4.6  | 1522.4 | 1111.8 | 24.6   | 1.0  |
| Ptarmagin-Spot 181 | 255  | 4011    | 2.5 | 22.0500   | 4.3   | 0.0241  | 5.4   | 0.0039 | 3.2 | 0.60 | 24.8   | 0.8  | 24.2   | 1.3  | 36.7   | 105.6  | 24.8   | 0.8  |
| Ptarmagin-Spot 260 | 55   | 1729    | 3.3 | 5.8513    | 19.6  | 0.0937  | 21.0  | 0.0040 | 7.6 | 0.36 | 25.6   | 1.9  | 90.9   | 18.3 | 2566.5 | 330.9  | 25.6   | 1.9  |
| Ptarmagin-Spot 189 | 804  | 2648    | 1.8 | 24.2679   | 2.3   | 0.0232  | 3.1   | 0.0041 | 2.1 | 0.68 | 26.3   | 0.6  | 23.3   | 0.7  | 274.8  | 57.5   | 26.3   | 0.6  |
| Ptarmagin-Spot 280 | 304  | 615     | 2.3 | 6.6954    | 9.4   | 0.0881  | 10.6  | 0.0043 | 4.9 | 0.47 | 27.5   | 1.4  | 85.7   | 8.7  | 2338.6 | 160.9  | 27.5   | 1.4  |
| Ptarmagin-Spot 112 | 500  | 3496    | 3.4 | 23.8366   | 2.5   | 0.0510  | 3.8   | 0.0088 | 2.9 | 0.75 | 56.6   | 1.6  | 50.6   | 1.9  | 229.4  | 64.2   | 56.6   | 1.6  |
| Ptarmagin-Spot 225 | 363  | 1975    | 3.1 | 23.8789   | 2.2   | 0.0512  | 3.8   | 0.0089 | 3.1 | 0.81 | 57.0   | 1.7  | 50.7   | 1.9  | 233.8  | 56.0   | 57.0   | 1.7  |
| Ptarmagin-Spot 286 | 1050 | 3952    | 2.3 | 21.8968   | 4.0   | 0.0561  | 4.5   | 0.0089 | 2.0 | 0.45 | 57.2   | 1.2  | 55.4   | 2.4  | 19.8   | 97.8   | 57.2   | 1.2  |
| Ptarmagin-Spot 171 | 508  | 7006    | 3.9 | 21.3516   | 2.3   | 0.0576  | 3.2   | 0.0089 | 2.2 | 0.69 | 57.2   | 1.3  | 56.8   | 1.8  | 40.8   | 55.0   | 57.2   | 1.3  |
| Ptarmagin-Spot 33  | 169  | 1811    | 1.6 | 25.7356   | 3.8   | 0.0478  | 5.5   | 0.0089 | 3.9 | 0.71 | 57.2   | 2.2  | 47.4   | 2.5  | 426.4  | 101.0  | 57.2   | 2.2  |
| Ptarmagin-Spot 34  | 412  | 2263    | 2.4 | 22.3237   | 3.1   | 0.0554  | 3.9   | 0.0090 | 2.4 | 0.62 | 57.5   | 1.4  | 54.7   | 2.1  | 66.7   | 75.1   | 57.5   | 1.4  |
| Ptarmagin-Spot 153 | 408  | 4826    | 4.6 | 21.0139   | 2.1   | 0.0591  | 3.3   | 0.0090 | 2.5 | 0.77 | 57.8   | 1.5  | 58.3   | 1.8  | 78.8   | 49.2   | 57.8   | 1.5  |
| Ptarmagin-Spot 88  | 355  | 2698    | 4.7 | 20.2025   | 2.3   | 0.0619  | 3.7   | 0.0091 | 2.9 | 0.79 | 58.2   | 1.7  | 61.0   | 2.2  | 171.5  | 53.8   | 58.2   | 1.7  |
| Ptarmagin-Spot 127 | 703  | 3891    | 4.2 | 20.5918   | 2.0   | 0.0607  | 3.0   | 0.0091 | 2.3 | 0.75 | 58.2   | 1.3  | 59.9   | 1.8  | 126.8  | 46.6   | 58.2   | 1.3  |
| Ptarmagin-Spot 306 | 843  | 5299    | 3.3 | 21.0428   | 1.6   | 0.0597  | 2.8   | 0.0091 | 2.3 | 0.83 | 58.5   | 1.4  | 58.9   | 1.6  | 75.5   | 37.1   | 58.5   | 1.4  |
| Ptarmagin-Spot 120 | 760  | 7899    | 9.5 | 21.7142   | 1.9   | 0.0579  | 3.5   | 0.0091 | 3.0 | 0.84 | 58.5   | 1.7  | 57.2   | 2.0  | 0.4    | 46.3   | 58.5   | 1.7  |
| Ptarmagin-Spot 134 | 1226 | 5595    | 5.4 | 22.1784   | 1.4   | 0.0569  | 2.3   | 0.0092 | 1.8 | 0.80 | 58.7   | 1.1  | 56.2   | 1.3  | 50.8   | 33.4   | 58.7   | 1.1  |
| Ptarmagin-Spot 68  | 693  | 3350    | 3.0 | 22.4954   | 3.4   | 0.0562  | 4.1   | 0.0092 | 2.2 | 0.54 | 58.9   | 1.3  | 55.6   | 2.2  | 85.5   | 83.8   | 58.9   | 1.3  |
| Ptarmagin-Spot 91  | 487  | 6099    | 2.8 | 21.7550   | 1.7   | 0.0582  | 2.8   | 0.0092 | 2.3 | 0.81 | 58.9   | 1.4  | 57.4   | 1.6  | 4.1    | 40.1   | 58.9   | 1.4  |
| Ptarmagin-Spot 84  | 1036 | 7766    | 3.6 | 21.6844   | 1.4   | 0.0584  | 2.9   | 0.0092 | 2.6 | 0.87 | 58.9   | 1.5  | 57.6   | 1.6  | 3.7    | 34.1   | 58.9   | 1.5  |
| Ptarmagin-Spot 266 | 1018 | 32738   | 6.1 | 21.2060   | 1.3   | 0.0598  | 2.7   | 0.0092 | 2.4 | 0.88 | 59.0   | 1.4  | 59.0   | 1.6  | 57.1   | 31.5   | 59.0   | 1.4  |
| Ptarmagin-Spot 239 | 693  | 273068  | 2.6 | 20.8003   | 1.7   | 0.0611  | 3.3   | 0.0092 | 2.8 | 0.85 | 59.1   | 1.6  | 60.2   | 1.9  | 103.0  | 40.7   | 59.1   | 1.6  |
| Ptarmagin-Spot 5   | 1230 | 7969    | 2.3 | 21.7889   | 1.2   | 0.0584  | 2.4   | 0.0092 | 2.1 | 0.87 | 59.2   | 1.3  | 57.6   | 1.4  | 7.9    | 29.3   | 59.2   | 1.3  |
| Ptarmagin-Spot 45  | 279  | 52241   | 2.3 | 20.1673   | 2.1   | 0.0633  | 3.4   | 0.0093 | 2.7 | 0.79 | 59.5   | 1.6  | 62.4   | 2.1  | 175.6  | 49.6   | 59.5   | 1.6  |
| Ptarmagin-Spot 26  | 1272 | 14414   | 4.8 | 21.2376   | 1.5   | 0.0602  | 3.0   | 0.0093 | 2.6 | 0.86 | 59.5   | 1.5  | 59.3   | 1.7  | 53.6   | 36.0   | 59.5   | 1.5  |
| Ptarmagin-Spot 1   | 719  | 4730    | 2.8 | 23.0005   | 4.0   | 0.0556  | 4.7   | 0.0093 | 2.5 | 0.53 | 59.5   | 1.5  | 54.9   | 2.5  | 140.2  | 98.5   | 59.5   | 1.5  |
| Ptarmagin-Spot 263 | 493  | 5086    | 4.4 | 21.4546   | 3.2   | 0.0596  | 4.0   | 0.0093 | 2.3 | 0.59 | 59.5   | 1.4  | 58.8   | 2.3  | 29.3   | 76.7   | 59.5   | 1.4  |
| Ptarmagin-Spot 207 | 283  | 3230    | 3.3 | 23.0623   | 2.8   | 0.0555  | 4.1   | 0.0093 | 3.0 | 0.73 | 59.5   | 1.8  | 54.8   | 2.2  | 146.8  | 69.6   | 59.5   | 1.8  |
| Ptarmagin-Spot 290 | 794  | 7305    | 3.5 | 21.1856   | 2.0   | 0.0605  | 3.0   | 0.0093 | 2.2 | 0.75 | 59.6   | 1.3  | 59.6   | 1.7  | 59.5   | 46.9   | 59.6   | 1.3  |
| Ptarmagin-Spot 61  | 373  | 11882   | 2.3 | 20.7207   | 2.5   | 0.0618  | 3.7   | 0.0093 | 2.7 | 0.74 | 59.6   | 1.6  | 60.9   | 2.2  | 112.1  | 58.7   | 59.6   | 1.6  |
| Ptarmagin-Spot 186 | 973  | 5537    | 3.9 | 16.6506   | 2.0   | 0.0771  | 2.9   | 0.0093 | 2.1 | 0.72 | 59.8   | 1.3  | 75.4   | 2.1  | 605.6  | 43.5   | 59.8   | 1.3  |
| Ptarmagin-Spot 160 | 418  | 7655    | 1.6 | 20.6798   | 2.8   | 0.0621  | 3.7   | 0.0093 | 2.4 | 0.66 | 59.8   | 1.4  | 61.2   | 2.2  | 116.7  | 65.6   | 59.8   | 1.4  |
| Ptarmagin-Spot 10  | 372  | 16962   | 2.4 | 21.4217   | 2.0   | 0.0600  | 4.1   | 0.0093 | 3.5 | 0.86 | 59.8   | 2.1  | 59.2   | 2.3  | 32.9   | 49.1   | 59.8   | 2.1  |
| Ptarmagin-Spot 216 |      |         |     |           |       |         |       |        |     |      |        |      |        |      |        |        |        |      |

|                    |      |        |      |         |      |        |      |        |     |      |      |     |      |      |        |        |      |     |
|--------------------|------|--------|------|---------|------|--------|------|--------|-----|------|------|-----|------|------|--------|--------|------|-----|
| Plarmagin-Spot 296 | 146  | 4254   | 3.6  | 20.4097 | 3.3  | 0.0636 | 5.1  | 0.0094 | 3.9 | 0.76 | 60.4 | 2.3 | 62.6 | 3.1  | 147.6  | 76.4   | 60.4 | 2.3 |
| Plarmagin-Spot 188 | 1055 | 18025  | 3.4  | 21.1602 | 1.4  | 0.0614 | 2.6  | 0.0094 | 2.1 | 0.83 | 60.4 | 1.3 | 60.5 | 1.5  | 62.3   | 34.2   | 60.4 | 1.3 |
| Plarmagin-Spot 4   | 780  | 44538  | 5.9  | 20.7190 | 1.4  | 0.0628 | 2.6  | 0.0094 | 2.2 | 0.85 | 60.6 | 1.3 | 61.9 | 1.6  | 112.3  | 32.1   | 60.6 | 1.3 |
| Plarmagin-Spot 235 | 236  | 15515  | 3.7  | 21.9733 | 2.4  | 0.0593 | 3.7  | 0.0094 | 2.8 | 0.76 | 60.6 | 1.7 | 58.5 | 2.1  | 28.3   | 58.3   | 60.6 | 1.7 |
| Plarmagin-Spot 44  | 390  | 8320   | 4.5  | 21.7498 | 2.0  | 0.0599 | 3.4  | 0.0095 | 2.7 | 0.80 | 60.6 | 1.6 | 59.1 | 1.9  | 3.5    | 48.6   | 60.6 | 1.6 |
| Plarmagin-Spot 12  | 1359 | 15940  | 4.1  | 20.8785 | 1.4  | 0.0625 | 2.1  | 0.0095 | 1.5 | 0.72 | 60.8 | 0.9 | 61.6 | 1.2  | 94.1   | 33.7   | 60.8 | 0.9 |
| Plarmagin-Spot 143 | 978  | 17241  | 7.1  | 21.2053 | 1.5  | 0.0616 | 2.5  | 0.0095 | 2.1 | 0.81 | 60.8 | 1.3 | 60.7 | 1.5  | 57.2   | 35.3   | 60.8 | 1.3 |
| Plarmagin-Spot 157 | 382  | 2071   | 2.8  | 24.5327 | 4.8  | 0.0533 | 5.5  | 0.0095 | 2.7 | 0.48 | 60.9 | 1.6 | 52.7 | 2.8  | 302.4  | 123.5  | 60.9 | 1.6 |
| Plarmagin-Spot 190 | 383  | 4817   | 2.8  | 20.7509 | 3.5  | 0.0631 | 4.1  | 0.0095 | 2.1 | 0.52 | 60.9 | 1.3 | 62.1 | 2.5  | 108.6  | 82.9   | 60.9 | 1.3 |
| Plarmagin-Spot 208 | 246  | 5777   | 10.0 | 21.4361 | 3.0  | 0.0611 | 4.2  | 0.0095 | 2.9 | 0.70 | 60.9 | 1.8 | 60.2 | 2.4  | 31.3   | 71.4   | 60.9 | 1.8 |
| Plarmagin-Spot 38  | 1531 | 11255  | 5.7  | 20.6515 | 1.4  | 0.0635 | 2.2  | 0.0095 | 1.7 | 0.77 | 61.0 | 1.0 | 62.5 | 1.3  | 120.0  | 33.6   | 61.0 | 1.0 |
| Plarmagin-Spot 192 | 702  | 2603   | 5.3  | 23.7171 | 1.7  | 0.0554 | 3.3  | 0.0095 | 2.8 | 0.86 | 61.1 | 1.7 | 54.7 | 1.7  | 216.7  | 41.8   | 61.1 | 1.7 |
| Plarmagin-Spot 63  | 296  | 2592   | 2.6  | 23.7580 | 2.4  | 0.0553 | 3.4  | 0.0095 | 2.4 | 0.70 | 61.1 | 1.5 | 54.6 | 1.8  | 221.1  | 61.5   | 61.1 | 1.5 |
| Plarmagin-Spot 86  | 590  | 95835  | 4.2  | 20.2519 | 1.5  | 0.0649 | 2.7  | 0.0095 | 2.3 | 0.84 | 61.2 | 1.4 | 63.9 | 1.7  | 165.8  | 34.5   | 61.2 | 1.4 |
| Plarmagin-Spot 272 | 525  | 3327   | 2.8  | 22.3591 | 1.9  | 0.0589 | 3.9  | 0.0095 | 3.4 | 0.87 | 61.2 | 2.1 | 58.1 | 2.2  | 70.6   | 46.7   | 61.2 | 2.1 |
| Plarmagin-Spot 125 | 1102 | 17174  | 5.3  | 17.1969 | 2.4  | 0.0766 | 3.0  | 0.0096 | 1.8 | 0.59 | 61.3 | 1.1 | 75.0 | 2.1  | 535.4  | 52.0   | 61.3 | 1.1 |
| Plarmagin-Spot 240 | 596  | 13003  | 2.7  | 21.2293 | 2.0  | 0.0621 | 3.3  | 0.0096 | 2.6 | 0.80 | 61.3 | 1.6 | 61.1 | 1.9  | 54.5   | 46.9   | 61.3 | 1.6 |
| Plarmagin-Spot 269 | 738  | 3629   | 3.4  | 22.1447 | 1.5  | 0.0596 | 2.6  | 0.0096 | 2.2 | 0.83 | 61.4 | 1.3 | 58.8 | 1.5  | 47.1   | 35.7   | 61.4 | 1.3 |
| Plarmagin-Spot 121 | 137  | 645    | 3.8  | 37.3025 | 32.8 | 0.0354 | 33.1 | 0.0096 | 4.3 | 0.13 | 61.4 | 2.6 | 35.3 | 11.5 | 1519.0 | 1118.8 | 61.4 | 2.6 |
| Plarmagin-Spot 255 | 586  | 8068   | 4.8  | 21.5430 | 1.9  | 0.0613 | 2.6  | 0.0096 | 1.7 | 0.66 | 61.4 | 1.0 | 60.4 | 1.5  | 19.4   | 46.1   | 61.4 | 1.0 |
| Plarmagin-Spot 17  | 270  | 1776   | 3.8  | 26.2742 | 7.2  | 0.0503 | 7.8  | 0.0096 | 2.8 | 0.36 | 61.5 | 1.7 | 49.8 | 3.8  | 481.0  | 192.2  | 61.5 | 1.7 |
| Plarmagin-Spot 119 | 871  | 6450   | 2.8  | 21.6517 | 1.5  | 0.0610 | 2.9  | 0.0096 | 2.5 | 0.86 | 61.5 | 1.5 | 60.1 | 1.7  | 7.3    | 35.6   | 61.5 | 1.5 |
| Plarmagin-Spot 77  | 260  | 2184   | 3.9  | 24.5679 | 2.7  | 0.0538 | 3.7  | 0.0096 | 2.5 | 0.68 | 61.6 | 1.6 | 53.3 | 1.9  | 306.1  | 70.3   | 61.6 | 1.6 |
| Plarmagin-Spot 62  | 433  | 3016   | 4.3  | 22.9974 | 2.8  | 0.0576 | 3.8  | 0.0096 | 2.6 | 0.69 | 61.7 | 1.6 | 56.9 | 2.1  | 139.8  | 68.8   | 61.7 | 1.6 |
| Plarmagin-Spot 227 | 172  | 1102   | 4.9  | 28.0106 | 7.0  | 0.0474 | 7.7  | 0.0096 | 3.1 | 0.40 | 61.8 | 1.9 | 47.0 | 3.5  | 653.8  | 193.0  | 61.8 | 1.9 |
| Plarmagin-Spot 42  | 299  | 1553   | 3.2  | 27.2530 | 12.5 | 0.0488 | 12.8 | 0.0097 | 3.1 | 0.24 | 61.9 | 1.9 | 48.4 | 6.1  | 579.0  | 338.0  | 61.9 | 1.9 |
| Plarmagin-Spot 214 | 490  | 2915   | 3.0  | 23.1273 | 2.0  | 0.0577 | 3.1  | 0.0097 | 2.4 | 0.76 | 62.1 | 1.5 | 57.0 | 1.7  | 153.8  | 50.4   | 62.1 | 1.5 |
| Plarmagin-Spot 209 | 288  | 1828   | 2.5  | 22.7761 | 3.2  | 0.0586 | 3.9  | 0.0097 | 2.2 | 0.57 | 62.2 | 1.4 | 57.9 | 2.2  | 116.0  | 78.8   | 62.2 | 1.4 |
| Plarmagin-Spot 152 | 150  | 1686   | 2.9  | 24.3806 | 8.6  | 0.0548 | 9.0  | 0.0097 | 2.9 | 0.32 | 62.2 | 1.8 | 54.2 | 4.8  | 286.6  | 218.7  | 62.2 | 1.8 |
| Plarmagin-Spot 71  | 862  | 9291   | 10.7 | 22.3452 | 1.9  | 0.0599 | 2.7  | 0.0097 | 1.9 | 0.70 | 62.2 | 1.2 | 59.0 | 1.6  | 69.1   | 47.3   | 62.2 | 1.2 |
| Plarmagin-Spot 305 | 1112 | 75950  | 1.6  | 20.9635 | 1.7  | 0.0638 | 2.8  | 0.0097 | 2.2 | 0.79 | 62.3 | 1.4 | 62.8 | 1.7  | 84.5   | 40.9   | 62.3 | 1.4 |
| Plarmagin-Spot 162 | 496  | 5591   | 2.9  | 22.0969 | 3.4  | 0.0606 | 4.0  | 0.0097 | 2.2 | 0.54 | 62.3 | 1.3 | 59.7 | 2.3  | 41.9   | 82.3   | 62.3 | 1.3 |
| Plarmagin-Spot 259 | 1710 | 21349  | 3.9  | 21.1164 | 1.2  | 0.0635 | 2.3  | 0.0097 | 2.0 | 0.85 | 62.3 | 1.2 | 62.5 | 1.4  | 67.2   | 29.4   | 62.3 | 1.2 |
| Plarmagin-Spot 267 | 846  | 11446  | 3.8  | 21.0260 | 1.5  | 0.0637 | 2.5  | 0.0097 | 2.0 | 0.80 | 62.3 | 1.2 | 62.7 | 1.5  | 77.4   | 36.1   | 62.3 | 1.2 |
| Plarmagin-Spot 109 | 837  | 12241  | 5.0  | 21.1924 | 1.8  | 0.0632 | 3.0  | 0.0097 | 2.4 | 0.80 | 62.3 | 1.5 | 62.3 | 1.8  | 58.7   | 42.4   | 62.3 | 1.5 |
| Plarmagin-Spot 224 | 229  | 2220   | 3.2  | 24.1476 | 3.2  | 0.0555 | 4.9  | 0.0097 | 3.7 | 0.75 | 62.4 | 2.3 | 54.9 | 2.6  | 262.2  | 82.0   | 62.4 | 2.3 |
| Plarmagin-Spot 35  | 252  | 3456   | 3.5  | 20.6186 | 2.7  | 0.0650 | 4.1  | 0.0097 | 3.1 | 0.75 | 62.4 | 1.9 | 64.0 | 2.6  | 123.7  | 63.8   | 62.4 | 1.9 |
| Plarmagin-Spot 126 | 604  | 12317  | 2.4  | 20.9332 | 1.6  | 0.0641 | 2.9  | 0.0097 | 2.3 | 0.82 | 62.4 | 1.5 | 63.1 | 1.7  | 88.0   | 39.1   | 62.4 | 1.5 |
| Plarmagin-Spot 301 | 1437 | 7572   | 5.7  | 22.3237 | 2.1  | 0.0601 | 3.5  | 0.0097 | 2.7 | 0.79 | 62.5 | 1.7 | 59.3 | 2.0  | 66.7   | 51.6   | 62.5 | 1.7 |
| Plarmagin-Spot 308 | 341  | 1903   | 2.9  | 24.6493 | 3.2  | 0.0545 | 4.8  | 0.0097 | 3.6 | 0.76 | 62.5 | 2.3 | 53.9 | 2.5  | 314.6  | 81.2   | 62.5 | 2.3 |
| Plarmagin-Spot 226 | 581  | 7034   | 4.4  | 21.6805 | 1.7  | 0.0620 | 2.8  | 0.0097 | 2.2 | 0.80 | 62.5 | 1.4 | 61.1 | 1.6  | 4.1    | 39.8   | 62.5 | 1.4 |
| Plarmagin-Spot 234 | 1125 | 7431   | 8.3  | 20.6150 | 2.0  | 0.0652 | 3.2  | 0.0097 | 2.4 | 0.77 | 62.5 | 1.5 | 64.1 | 2.0  | 124.1  | 48.0   | 62.5 | 1.5 |
| Plarmagin-Spot 200 | 832  | 17764  | 2.1  | 20.7195 | 1.5  | 0.0649 | 2.9  | 0.0097 | 2.5 | 0.85 | 62.5 | 1.5 | 63.8 | 1.8  | 112.2  | 36.0   | 62.5 | 1.5 |
| Plarmagin-Spot 196 | 533  | 3451   | 3.4  | 22.5652 | 4.4  | 0.0596 | 4.9  | 0.0098 | 2.2 | 0.45 | 62.6 | 1.4 | 58.8 | 2.8  | 93.1   | 107.7  | 62.6 | 1.4 |
| Plarmagin-Spot 314 | 1074 | 283601 | 9.7  | 21.2888 | 1.4  | 0.0632 | 2.4  | 0.0098 | 2.0 | 0.82 | 62.6 | 1.2 | 62.2 | 1.5  | 47.9   | 33.3   | 62.6 | 1.2 |
| Plarmagin-Spot 6   | 510  | 2005   | 2.3  | 24.3431 | 2.1  | 0.0553 | 3.2  | 0.0098 | 2.3 | 0.74 | 62.6 | 1.5 | 54.6 | 1.7  | 282.7  | 54.0   | 62.6 | 1.5 |
| Plarmagin-Spot 101 | 405  | 4309   | 2.1  | 14.9892 | 5.8  | 0.0898 | 6.3  | 0.0098 | 2.4 | 0.38 | 62.6 | 1.5 | 87.3 | 5.3  | 828.9  | 121.2  | 62.6 | 1.5 |
| Plarmagin-Spot 257 | 146  | 727    | 3.9  | 33.9608 | 4.1  | 0.0397 | 5.1  | 0.0098 | 3.1 | 0.61 | 62.7 | 1.9 | 39.5 | 2.0  | 1216.6 | 126.2  | 62.7 | 1.9 |
| Plarmagin-Spot 283 | 740  | 17963  | 1.8  | 20.9052 | 1.5  | 0.0645 | 2.8  | 0.0098 | 2.4 | 0.85 | 62.7 | 1.5 | 63.4 | 1.8  | 91.1   | 35.9   | 62.7 | 1.5 |
| Plarmagin-Spot 48  | 573  | 3080   | 4.8  | 23.9963 | 3.6  | 0.0562 | 4.3  | 0.0098 | 2.3 | 0.54 | 62.7 | 1.5 | 55.5 | 2.3  | 246.2  | 92.0   | 62.7 | 1.5 |
| Plarmagin-Spot 100 | 783  | 20574  | 3.9  | 18.0222 | 1.8  | 0.0749 | 2.7  | 0.0098 | 2.1 | 0.77 | 62.8 | 1.3 | 73.3 | 1.9  | 431.9  | 39.2   | 62.8 | 1.3 |
| Plarmagin-Spot 81  | 309  | 3279   | 2.5  | 21.5527 | 5.5  | 0.0627 | 6.0  | 0.0098 | 2.6 | 0.43 | 62.9 | 1.6 | 61.8 | 3.6  | 18.4   | 131.3  | 62.9 | 1.6 |
| Plarmagin-Spot 245 | 366  | 6072   | 2.0  | 21.3184 | 2.5  | 0.0635 | 3.6  | 0.0098 | 2.5 | 0.71 | 63.0 | 1.6 | 62.5 | 2.2  | 44.5   | 60.5   | 63.0 | 1.6 |
| Plarmagin-Spot 251 | 2078 | 53097  | 5.5  | 20.9481 | 1.1  | 0.0647 | 2.5  | 0.0098 | 2.3 | 0.91 | 63.1 | 1.4 | 63.7 | 1.5  | 86.3   | 25.0   | 63.1 | 1.4 |
| Plarmagin-Spot 60  | 255  | 2105   | 3.1  | 23.3167 | 3.9  | 0.0582 | 5.1  | 0.0098 | 3.2 | 0.63 | 63.1 | 2.0 | 57.4 | 2.8  | 174.1  | 98.2   | 63.1 | 2.0 |
| Plarmagin-Spot 173 | 760  | 5234   | 2.0  | 22.6526 | 1.1  | 0.0599 | 2.2  | 0.0098 | 1.9 | 0.87 | 63.2 | 1.2 | 59.1 | 1.3  | 102.6  | 26.9   | 63.2 | 1.2 |
| Plarmagin-Spot 252 | 198  | 4351   | 2.6  | 20.9639 | 2.5  | 0.0651 | 3.8  | 0.0099 | 2.9 | 0.75 | 63.5 | 1.8 | 64.0 | 2.4  | 84.4   | 60.1   | 63.5 | 1.8 |
| Plarmagin-Spot 282 | 1386 | 13783  | 5.3  | 21.2058 | 1.2  | 0.0644 | 2.4  | 0.0099 | 2.1 | 0.87 | 63.6 | 1.3 | 63.4 | 1.5  | 57.2   | 28.5   | 63.6 | 1.3 |
| Plarmagin-Spot 118 | 1065 | 9134   | 4.6  | 19.9935 | 1.2  | 0.0684 | 2.3  | 0.0099 | 1.9 | 0.84 | 63.6 | 1.2 | 67.1 | 1.5  | 195.8  | 28.6   | 63.6 | 1.2 |
| Plarmagin-Spot 51  | 539  | 26199  | 6.9  | 20.9227 | 1.5  | 0.0657 | 3.1  | 0.0100 | 2.7 | 0.87 | 64.0 | 1.7 | 64.6 | 1.9  | 89.2   | 36.3   | 64.0 | 1.7 |
| Plarmagin-Spot 170 | 581  | 3776   | 4.8  | 19.8802 | 2.1  | 0.0692 | 2.9  | 0.0100 | 2.0 | 0.68 | 64.0 | 1.3 | 68.0 | 1.9  | 208.9  | 49.4   | 64.0 | 1.3 |
| Plarmagin-Spot 102 | 230  | 5826   | 3.5  | 21.9748 | 2.5  | 0.0628 | 4.4  | 0.0100 | 3.6 | 0.83 | 64.2 | 2.3 | 61.8 | 2.6  | 28.4   | 59.4   | 64.2 | 2.3 |
| Plarmagin-Spot 154 | 197  | 2152   | 3.5  | 24.5860 | 3.8  | 0.0563 | 4.6  | 0.0100 | 2.6 | 0.56 | 64.4 | 1.6 | 55.6 | 2.5  | 308.0  | 96.4   | 64.4 | 1.6 |
| Plarmagin-Spot 23  | 940  | 2568   | 3.0  | 18.1194 | 3.3  | 0.0764 | 4.1  | 0.0100 | 2.4 | 0.59 | 64.4 | 1.6 | 74.8 | 3.0  | 419.9  | 73.6   | 64.4 | 1.6 |
| Plarmagin-Spot 172 | 1227 | 26854  | 1.4  | 21.2462 | 1.3  | 0.0652 | 2.1  | 0.0100 | 1.6 | 0.76 | 64.4 | 1.0 | 64.1 | 1.3  | 52.6   | 32.0   | 64.4 | 1.0 |
| Plarmagin-Spot 167 | 1388 | 21276  | 4.3  | 21.1149 | 1.4  | 0.0657 | 2.4  | 0.0101 | 1.9 | 0.79 | 64.5 | 1.2 | 64.6 | 1.5  | 67.4   | 34.4   | 64.5 | 1.2 |
| Plarmagin-Spot 53  | 1486 | 7766   | 4.9  | 21.7847 | 1.7  | 0.0637 | 2.7  | 0.0101 | 2.1 | 0.78 | 64.6 | 1.3 | 62.7 | 1.6  | 7.4    | 40.7   | 64.6 | 1.3 |
| Plarmagin-Spot 237 | 362  | 2197   | 4.7  | 23.3761 | 3.7  | 0.0595 | 4.4  | 0.0101 | 2.5 | 0.56 | 64.7 | 1.6 | 58.6 | 2.5  | 180.5  | 91.1   | 64.7 | 1.6 |
| Plarmagin-Spot 158 | 458  | 2641   | 2.3  | 13.5817 | 7.6  | 0.1025 | 8.1  | 0.0101 | 2.7 | 0.34 | 64.8 |     |      |      |        |        |      |     |

|                    |      |        |      |         |      |        |      |        |     |      |      |     |       |     |        |       |      |     |
|--------------------|------|--------|------|---------|------|--------|------|--------|-----|------|------|-----|-------|-----|--------|-------|------|-----|
| Plarmagin-Spot 124 | 496  | 4492   | 4.1  | 22.6009 | 1.7  | 0.0624 | 2.8  | 0.0102 | 2.2 | 0.79 | 65.6 | 1.4 | 61.5  | 1.7 | 97.0   | 42.3  | 65.6 | 1.4 |
| Plarmagin-Spot 72  | 584  | 6742   | 3.1  | 21.2237 | 2.1  | 0.0665 | 3.3  | 0.0102 | 2.5 | 0.76 | 65.6 | 1.6 | 65.4  | 2.1 | 55.2   | 50.6  | 65.6 | 1.6 |
| Plarmagin-Spot 111 | 1555 | 7858   | 3.8  | 21.7421 | 1.2  | 0.0649 | 2.4  | 0.0102 | 2.1 | 0.87 | 65.7 | 1.4 | 63.9  | 1.5 | 2.7    | 29.4  | 65.7 | 1.4 |
| Plarmagin-Spot 194 | 659  | 38426  | 4.4  | 21.3843 | 1.8  | 0.0660 | 2.6  | 0.0102 | 1.8 | 0.72 | 65.7 | 1.2 | 64.9  | 1.6 | 37.1   | 42.5  | 65.7 | 1.2 |
| Plarmagin-Spot 201 | 146  | 1958   | 4.4  | 23.1418 | 9.5  | 0.0610 | 10.0 | 0.0102 | 3.1 | 0.31 | 65.7 | 2.0 | 60.2  | 5.8 | 155.4  | 235.4 | 65.7 | 2.0 |
| Plarmagin-Spot 76  | 901  | 128542 | 4.3  | 21.2060 | 1.1  | 0.0666 | 2.4  | 0.0102 | 2.1 | 0.88 | 65.7 | 1.4 | 65.5  | 1.5 | 57.1   | 26.6  | 65.7 | 1.4 |
| Plarmagin-Spot 145 | 185  | 6086   | 2.9  | 20.6179 | 3.0  | 0.0686 | 4.3  | 0.0103 | 3.0 | 0.71 | 65.8 | 2.0 | 67.4  | 2.8 | 123.8  | 70.6  | 65.8 | 2.0 |
| Plarmagin-Spot 292 | 860  | 144868 | 4.2  | 20.8636 | 1.5  | 0.0679 | 2.4  | 0.0103 | 1.9 | 0.78 | 65.9 | 1.2 | 66.7  | 1.6 | 95.8   | 36.1  | 65.9 | 1.2 |
| Plarmagin-Spot 113 | 1528 | 3545   | 3.7  | 19.5934 | 1.9  | 0.0725 | 2.4  | 0.0103 | 1.5 | 0.63 | 66.0 | 1.0 | 71.0  | 1.7 | 242.5  | 43.3  | 66.0 | 1.0 |
| Plarmagin-Spot 303 | 384  | 7669   | 2.9  | 17.1734 | 2.7  | 0.0827 | 3.9  | 0.0103 | 2.8 | 0.71 | 66.1 | 1.8 | 80.7  | 3.0 | 538.4  | 59.2  | 66.1 | 1.8 |
| Plarmagin-Spot 302 | 1115 | 46983  | 5.9  | 20.9233 | 1.2  | 0.0679 | 2.4  | 0.0103 | 2.0 | 0.87 | 66.1 | 1.3 | 66.7  | 1.5 | 89.1   | 27.6  | 66.1 | 1.3 |
| Plarmagin-Spot 265 | 720  | 3277   | 3.0  | 23.4330 | 1.4  | 0.0607 | 2.7  | 0.0103 | 2.3 | 0.84 | 66.1 | 1.5 | 59.8  | 1.6 | 186.5  | 36.1  | 66.1 | 1.5 |
| Plarmagin-Spot 90  | 1804 | 70139  | 3.1  | 20.9601 | 1.1  | 0.0679 | 2.3  | 0.0103 | 1.9 | 0.86 | 66.2 | 1.3 | 66.7  | 1.5 | 84.9   | 27.2  | 66.2 | 1.3 |
| Plarmagin-Spot 210 | 331  | 5650   | 5.9  | 23.3031 | 1.9  | 0.0611 | 3.5  | 0.0103 | 3.0 | 0.85 | 66.2 | 2.0 | 60.2  | 2.1 | 172.6  | 46.8  | 66.2 | 2.0 |
| Plarmagin-Spot 168 | 436  | 2592   | 5.6  | 15.9789 | 4.6  | 0.0891 | 5.3  | 0.0103 | 2.6 | 0.48 | 66.2 | 1.7 | 86.7  | 4.4 | 694.1  | 99.0  | 66.2 | 1.7 |
| Plarmagin-Spot 281 | 440  | 4523   | 4.2  | 22.2444 | 3.1  | 0.0641 | 3.7  | 0.0103 | 2.0 | 0.55 | 66.3 | 1.3 | 63.1  | 2.2 | 58.1   | 74.6  | 66.3 | 1.3 |
| Plarmagin-Spot 166 | 1023 | 17756  | 6.6  | 21.2693 | 1.5  | 0.0671 | 2.5  | 0.0103 | 2.0 | 0.80 | 66.4 | 1.3 | 65.9  | 1.6 | 50.0   | 36.1  | 66.4 | 1.3 |
| Plarmagin-Spot 138 | 3092 | 50446  | 11.3 | 20.1205 | 1.0  | 0.0710 | 2.2  | 0.0104 | 2.0 | 0.89 | 66.4 | 1.3 | 69.6  | 1.5 | 181.0  | 23.2  | 66.4 | 1.3 |
| Plarmagin-Spot 180 | 192  | 3827   | 11.3 | 23.0190 | 3.2  | 0.0622 | 5.0  | 0.0104 | 3.9 | 0.77 | 66.6 | 2.6 | 61.3  | 3.0 | 142.2  | 79.2  | 66.6 | 2.6 |
| Plarmagin-Spot 161 | 833  | 15617  | 8.6  | 19.3950 | 1.9  | 0.0739 | 2.9  | 0.0104 | 2.1 | 0.74 | 66.6 | 1.4 | 72.4  | 2.0 | 265.9  | 44.8  | 66.6 | 1.4 |
| Plarmagin-Spot 15  | 501  | 4266   | 3.5  | 22.4297 | 1.9  | 0.0639 | 3.3  | 0.0104 | 2.7 | 0.82 | 66.7 | 1.8 | 62.9  | 2.0 | 78.3   | 45.7  | 66.7 | 1.8 |
| Plarmagin-Spot 74  | 712  | 2812   | 5.2  | 22.8981 | 2.2  | 0.0627 | 3.0  | 0.0104 | 1.9 | 0.65 | 66.8 | 1.3 | 61.7  | 1.8 | 129.1  | 55.5  | 66.8 | 1.3 |
| Plarmagin-Spot 231 | 795  | 7918   | 8.3  | 20.6508 | 1.8  | 0.0696 | 2.7  | 0.0104 | 2.0 | 0.76 | 66.8 | 1.4 | 68.3  | 1.8 | 120.1  | 41.3  | 66.8 | 1.4 |
| Plarmagin-Spot 49  | 1193 | 11279  | 3.7  | 20.1397 | 1.9  | 0.0716 | 2.4  | 0.0105 | 1.5 | 0.61 | 67.0 | 1.0 | 70.2  | 1.6 | 178.8  | 44.3  | 67.0 | 1.0 |
| Plarmagin-Spot 27  | 969  | 4500   | 1.9  | 21.8513 | 1.7  | 0.0662 | 2.5  | 0.0105 | 1.9 | 0.74 | 67.3 | 1.3 | 65.1  | 1.6 | 14.8   | 41.0  | 67.3 | 1.3 |
| Plarmagin-Spot 75  | 190  | 2163   | 5.8  | 24.3385 | 3.0  | 0.0595 | 4.6  | 0.0105 | 3.5 | 0.76 | 67.3 | 2.3 | 58.6  | 2.6 | 282.2  | 75.2  | 67.3 | 2.3 |
| Plarmagin-Spot 311 | 1570 | 376594 | 5.1  | 21.1285 | 1.1  | 0.0685 | 2.3  | 0.0105 | 2.1 | 0.89 | 67.3 | 1.4 | 67.3  | 1.5 | 65.9   | 25.9  | 67.3 | 1.4 |
| Plarmagin-Spot 310 | 594  | 12956  | 6.4  | 16.3275 | 3.3  | 0.0887 | 3.9  | 0.0105 | 2.1 | 0.54 | 67.4 | 1.4 | 86.3  | 3.3 | 647.9  | 71.7  | 67.4 | 1.4 |
| Plarmagin-Spot 136 | 288  | 1396   | 4.9  | 25.0774 | 11.0 | 0.0578 | 11.3 | 0.0105 | 2.5 | 0.22 | 67.4 | 1.7 | 57.0  | 6.2 | 358.9  | 284.6 | 67.4 | 1.7 |
| Plarmagin-Spot 132 | 299  | 1537   | 3.0  | 25.7545 | 2.1  | 0.0563 | 3.4  | 0.0105 | 2.7 | 0.79 | 67.4 | 1.8 | 55.6  | 1.8 | 428.3  | 54.6  | 67.4 | 1.8 |
| Plarmagin-Spot 175 | 708  | 6409   | 9.7  | 21.5985 | 1.6  | 0.0673 | 3.5  | 0.0105 | 3.1 | 0.89 | 67.6 | 2.1 | 66.1  | 2.3 | 13.2   | 37.7  | 67.6 | 2.1 |
| Plarmagin-Spot 73  | 521  | 16698  | 6.4  | 21.6098 | 1.8  | 0.0673 | 3.6  | 0.0105 | 3.2 | 0.87 | 67.6 | 2.1 | 66.1  | 2.3 | 12.0   | 42.3  | 67.6 | 2.1 |
| Plarmagin-Spot 195 | 1696 | 20646  | 6.6  | 20.9433 | 1.4  | 0.0694 | 2.6  | 0.0105 | 2.2 | 0.84 | 67.6 | 1.5 | 68.2  | 1.7 | 86.8   | 34.1  | 67.6 | 1.5 |
| Plarmagin-Spot 139 | 562  | 5298   | 5.5  | 21.4786 | 1.9  | 0.0678 | 2.6  | 0.0106 | 1.7 | 0.67 | 67.7 | 1.2 | 66.6  | 1.7 | 26.6   | 46.2  | 67.7 | 1.2 |
| Plarmagin-Spot 203 | 519  | 8158   | 3.4  | 20.2324 | 1.4  | 0.0724 | 2.7  | 0.0106 | 2.4 | 0.87 | 68.1 | 1.6 | 70.9  | 1.9 | 168.1  | 31.7  | 68.1 | 1.6 |
| Plarmagin-Spot 130 | 435  | 1885   | 4.0  | 23.2060 | 1.6  | 0.0632 | 2.6  | 0.0106 | 2.0 | 0.78 | 68.2 | 1.4 | 62.2  | 1.6 | 162.3  | 40.6  | 68.2 | 1.4 |
| Plarmagin-Spot 298 | 879  | 7897   | 3.3  | 21.2291 | 2.3  | 0.0693 | 3.0  | 0.0107 | 2.0 | 0.66 | 68.4 | 1.3 | 68.0  | 2.0 | 54.5   | 53.8  | 68.4 | 1.3 |
| Plarmagin-Spot 82  | 248  | 3486   | 1.9  | 23.0570 | 3.3  | 0.0639 | 4.1  | 0.0107 | 2.4 | 0.59 | 68.5 | 1.6 | 62.9  | 2.5 | 146.3  | 81.5  | 68.5 | 1.6 |
| Plarmagin-Spot 57  | 955  | 7438   | 4.2  | 21.8389 | 2.2  | 0.0675 | 3.1  | 0.0107 | 2.2 | 0.70 | 68.5 | 1.5 | 66.3  | 2.0 | 13.4   | 53.9  | 68.5 | 1.5 |
| Plarmagin-Spot 93  | 774  | 4044   | 2.7  | 22.7731 | 2.3  | 0.0647 | 3.0  | 0.0107 | 2.0 | 0.65 | 68.5 | 1.3 | 63.7  | 1.9 | 115.6  | 56.4  | 68.5 | 1.3 |
| Plarmagin-Spot 273 | 274  | 1187   | 9.9  | 26.2695 | 2.4  | 0.0562 | 3.4  | 0.0107 | 2.4 | 0.71 | 68.6 | 1.7 | 55.5  | 1.9 | 480.5  | 64.1  | 68.6 | 1.7 |
| Plarmagin-Spot 284 | 533  | 11819  | 4.7  | 21.6245 | 1.4  | 0.0684 | 2.8  | 0.0107 | 2.5 | 0.88 | 68.8 | 1.7 | 67.2  | 1.8 | 10.4   | 32.6  | 68.8 | 1.7 |
| Plarmagin-Spot 294 | 575  | 11271  | 3.9  | 21.0792 | 1.9  | 0.0702 | 3.0  | 0.0107 | 2.3 | 0.77 | 68.8 | 1.6 | 68.9  | 2.0 | 71.4   | 44.7  | 68.8 | 1.6 |
| Plarmagin-Spot 289 | 791  | 4507   | 3.9  | 21.7872 | 1.7  | 0.0680 | 2.5  | 0.0107 | 1.8 | 0.73 | 68.9 | 1.3 | 66.8  | 1.6 | 7.7    | 40.9  | 68.9 | 1.3 |
| Plarmagin-Spot 242 | 752  | 27138  | 3.9  | 20.4320 | 1.4  | 0.0725 | 3.0  | 0.0107 | 2.7 | 0.89 | 68.9 | 1.8 | 71.1  | 2.1 | 145.1  | 32.6  | 68.9 | 1.8 |
| Plarmagin-Spot 205 | 969  | 9164   | 5.1  | 22.0782 | 1.3  | 0.0671 | 2.3  | 0.0107 | 1.9 | 0.83 | 68.9 | 1.3 | 66.0  | 1.5 | 39.8   | 30.9  | 68.9 | 1.3 |
| Plarmagin-Spot 295 | 846  | 5099   | 2.6  | 22.5080 | 1.8  | 0.0658 | 2.8  | 0.0107 | 2.2 | 0.77 | 68.9 | 1.5 | 64.7  | 1.8 | 86.9   | 43.8  | 68.9 | 1.5 |
| Plarmagin-Spot 179 | 641  | 17895  | 5.2  | 20.1089 | 1.3  | 0.0740 | 3.0  | 0.0108 | 2.7 | 0.90 | 69.2 | 1.9 | 72.5  | 2.1 | 182.3  | 30.1  | 69.2 | 1.9 |
| Plarmagin-Spot 229 | 381  | 1016   | 4.1  | 9.6518  | 5.3  | 0.1542 | 5.8  | 0.0108 | 2.3 | 0.39 | 69.2 | 1.6 | 145.6 | 7.9 | 1689.7 | 98.5  | 69.2 | 1.6 |
| Plarmagin-Spot 222 | 228  | 135314 | 5.0  | 21.1567 | 2.0  | 0.0705 | 3.9  | 0.0108 | 3.4 | 0.86 | 69.3 | 2.3 | 69.1  | 2.6 | 62.7   | 47.7  | 69.3 | 2.3 |
| Plarmagin-Spot 232 | 482  | 9469   | 4.4  | 22.0976 | 1.4  | 0.0680 | 2.8  | 0.0109 | 2.4 | 0.87 | 69.9 | 1.7 | 66.8  | 1.8 | 41.9   | 33.9  | 69.9 | 1.7 |
| Plarmagin-Spot 146 | 417  | 3890   | 6.0  | 22.8746 | 3.8  | 0.0660 | 4.4  | 0.0109 | 2.3 | 0.51 | 70.2 | 1.6 | 64.9  | 2.8 | 126.6  | 94.5  | 70.2 | 1.6 |
| Plarmagin-Spot 59  | 622  | 4497   | 5.4  | 21.9059 | 3.1  | 0.0689 | 3.7  | 0.0110 | 2.1 | 0.55 | 70.2 | 1.4 | 67.7  | 2.5 | 20.8   | 75.6  | 70.2 | 1.4 |
| Plarmagin-Spot 55  | 2706 | 195778 | 6.4  | 21.0210 | 1.0  | 0.0722 | 2.1  | 0.0110 | 1.9 | 0.88 | 70.6 | 1.3 | 70.8  | 1.4 | 78.0   | 24.0  | 70.6 | 1.3 |
| Plarmagin-Spot 117 | 616  | 12388  | 4.2  | 21.2945 | 1.6  | 0.0714 | 2.4  | 0.0110 | 1.8 | 0.76 | 70.7 | 1.3 | 70.0  | 1.6 | 47.2   | 38.1  | 70.7 | 1.3 |
| Plarmagin-Spot 219 | 675  | 30941  | 4.2  | 21.3483 | 1.5  | 0.0713 | 3.1  | 0.0110 | 2.7 | 0.87 | 70.8 | 1.9 | 69.9  | 2.1 | 41.2   | 36.7  | 70.8 | 1.9 |
| Plarmagin-Spot 155 | 298  | 2465   | 5.2  | 24.6122 | 3.1  | 0.0619 | 4.4  | 0.0110 | 3.2 | 0.72 | 70.8 | 2.2 | 61.0  | 2.6 | 310.7  | 78.6  | 70.8 | 2.2 |
| Plarmagin-Spot 197 | 437  | 11402  | 4.1  | 18.7800 | 2.0  | 0.0812 | 3.5  | 0.0111 | 2.9 | 0.82 | 70.9 | 2.0 | 79.3  | 2.6 | 339.4  | 44.6  | 70.9 | 2.0 |
| Plarmagin-Spot 52  | 995  | 21730  | 3.5  | 21.2093 | 1.3  | 0.0722 | 2.3  | 0.0111 | 2.0 | 0.85 | 71.2 | 1.4 | 70.7  | 1.6 | 56.8   | 29.8  | 71.2 | 1.4 |
| Plarmagin-Spot 254 | 1428 | 22185  | 5.7  | 21.1609 | 1.2  | 0.0725 | 2.6  | 0.0111 | 2.3 | 0.89 | 71.3 | 1.6 | 71.0  | 1.8 | 62.2   | 28.7  | 71.3 | 1.6 |
| Plarmagin-Spot 156 | 1666 | 16776  | 3.5  | 20.2775 | 1.2  | 0.0757 | 2.2  | 0.0111 | 1.8 | 0.83 | 71.4 | 1.3 | 74.1  | 1.6 | 162.8  | 29.0  | 71.4 | 1.3 |
| Plarmagin-Spot 108 | 425  | 2334   | 4.4  | 24.1690 | 4.5  | 0.0636 | 5.1  | 0.0111 | 2.3 | 0.45 | 71.4 | 1.6 | 62.6  | 3.1 | 264.4  | 114.9 | 71.4 | 1.6 |
| Plarmagin-Spot 223 | 702  | 11818  | 2.8  | 21.3457 | 1.6  | 0.0726 | 2.9  | 0.0112 | 2.4 | 0.82 | 72.0 | 1.7 | 71.1  | 2.0 | 41.5   | 39.3  | 72.0 | 1.7 |
| Plarmagin-Spot 105 | 232  | 1876   | 2.7  | 24.8890 | 10.4 | 0.0624 | 10.8 | 0.0113 | 3.0 | 0.28 | 72.2 | 2.2 | 61.5  | 6.5 | 339.5  | 268.6 | 72.2 | 2.2 |
| Plarmagin-Spot 164 | 667  | 4306   | 4.0  | 23.1395 | 2.0  | 0.0676 | 3.0  | 0.0114 | 2.3 | 0.76 | 72.8 | 1.6 | 66.5  | 1.9 | 155.1  | 48.7  | 72.8 | 1.6 |
| Plarmagin-Spot 184 | 820  | 8202   | 7.6  | 20.1607 | 1.7  | 0.0781 | 2.8  | 0.0114 | 2.3 | 0.80 | 73.2 | 1.6 | 76.3  | 2.1 | 176.3  | 39.2  | 73.2 | 1.6 |
| Plarmagin-Spot 107 | 319  | 19790  | 4.2  | 20.9036 | 2.5  | 0.0754 | 3.8  | 0.0114 | 2.9 | 0.75 | 73.3 | 2.1 | 73.8  | 2.7 | 91.3   | 60.1  | 73.3 | 2.1 |
| Plarmagin-Spot 123 | 550  | 5400   | 3.4  | 21.3917 | 1.7  | 0.0740 | 2.7  | 0.0115 | 2.1 | 0.78 | 73.6 | 1.5 | 72.5  | 1.9 | 36.3   | 39.7  | 73.6 | 1.5 |
| Plarmagin-Spot 244 | 702  | 4218   | 3.9  | 2       |      |        |      |        |     |      |      |     |       |     |        |       |      |     |

|                    |      |         |      |          |       |        |       |        |     |      |        |      |        |      |        |        |       |      |
|--------------------|------|---------|------|----------|-------|--------|-------|--------|-----|------|--------|------|--------|------|--------|--------|-------|------|
| Plarmagin-Spot 206 | 41   | 388     | 7.5  | 101.8841 | 90.3  | 0.0168 | 90.5  | 0.0124 | 6.1 | 0.07 | 79.7   | 4.9  | 17.0   | 15.2 | 0.0    | 820.3  | 79.7  | 4.9  |
| Plarmagin-Spot 304 | 77   | 718     | 4.7  | 36.9711  | 9.9   | 0.0466 | 10.7  | 0.0125 | 4.1 | 0.38 | 80.1   | 3.3  | 46.3   | 4.9  | 1489.3 | 329.1  | 80.1  | 3.3  |
| Plarmagin-Spot 25  | 65   | 402     | 3.7  | 130.4599 | 154.8 | 0.0135 | 154.8 | 0.0128 | 4.6 | 0.03 | 81.7   | 3.8  | 13.6   | 20.9 | 0.0    | 0.0    | 81.7  | 3.8  |
| Plarmagin-Spot 70  | 73   | 542     | 4.0  | 29.8171  | 10.4  | 0.0590 | 11.2  | 0.0128 | 4.2 | 0.38 | 81.8   | 3.4  | 58.2   | 6.4  | 828.9  | 298.0  | 81.8  | 3.4  |
| Plarmagin-Spot 21  | 51   | 785     | 3.8  | 29.8515  | 10.6  | 0.0590 | 11.5  | 0.0128 | 4.4 | 0.38 | 81.8   | 3.6  | 58.2   | 6.5  | 832.2  | 304.2  | 81.8  | 3.6  |
| Plarmagin-Spot 99  | 56   | 1935    | 2.9  | 22.5662  | 4.2   | 0.0790 | 6.4   | 0.0129 | 4.8 | 0.75 | 82.9   | 3.9  | 77.2   | 4.7  | 93.2   | 102.7  | 82.9  | 3.9  |
| Plarmagin-Spot 2   | 65   | 1651    | 4.7  | 22.9033  | 4.6   | 0.0783 | 7.2   | 0.0130 | 5.6 | 0.77 | 83.3   | 4.6  | 76.5   | 5.3  | 129.7  | 114.2  | 83.3  | 4.6  |
| Plarmagin-Spot 7   | 48   | 6808    | 4.1  | 21.3284  | 4.5   | 0.0841 | 7.8   | 0.0130 | 6.3 | 0.82 | 83.3   | 5.2  | 82.0   | 6.1  | 43.4   | 107.4  | 83.3  | 5.2  |
| Plarmagin-Spot 37  | 60   | 2527    | 4.4  | 21.9925  | 3.7   | 0.0819 | 7.2   | 0.0131 | 6.2 | 0.86 | 83.6   | 5.2  | 79.9   | 5.6  | 30.4   | 89.8   | 83.6  | 5.2  |
| Plarmagin-Spot 137 | 59   | 773     | 3.3  | 30.3491  | 21.9  | 0.0594 | 22.4  | 0.0131 | 5.0 | 0.22 | 83.7   | 4.1  | 58.6   | 12.8 | 879.6  | 636.9  | 83.7  | 4.1  |
| Plarmagin-Spot 40  | 173  | 107268  | 2.9  | 20.5579  | 3.0   | 0.0877 | 4.1   | 0.0131 | 2.7 | 0.67 | 83.7   | 2.3  | 85.3   | 3.3  | 130.7  | 71.0   | 83.7  | 2.3  |
| Plarmagin-Spot 18  | 1001 | 1652851 | 5.4  | 20.3859  | 1.3   | 0.0884 | 2.7   | 0.0131 | 2.4 | 0.87 | 83.7   | 2.0  | 86.0   | 2.2  | 150.4  | 31.0   | 83.7  | 2.0  |
| Plarmagin-Spot 24  | 412  | 4436    | 5.2  | 22.9523  | 3.2   | 0.0785 | 3.9   | 0.0131 | 2.2 | 0.57 | 83.7   | 1.8  | 76.8   | 2.9  | 135.0  | 78.8   | 83.7  | 1.8  |
| Plarmagin-Spot 67  | 128  | 3191    | 2.8  | 22.5735  | 2.3   | 0.0805 | 4.1   | 0.0132 | 3.4 | 0.83 | 84.4   | 2.9  | 78.6   | 3.1  | 94.0   | 57.2   | 84.4  | 2.9  |
| Plarmagin-Spot 64  | 61   | 404     | 2.2  | 60.0751  | 12.7  | 0.0303 | 13.6  | 0.0132 | 4.8 | 0.36 | 84.5   | 4.1  | 30.3   | 4.1  | 0.0    | 1426.2 | 84.5  | 4.1  |
| Plarmagin-Spot 43  | 74   | 576     | 3.3  | 42.6799  | 37.1  | 0.0428 | 37.2  | 0.0133 | 3.1 | 0.08 | 84.9   | 2.6  | 42.6   | 15.5 | 1994.7 | 268.9  | 84.9  | 2.6  |
| Plarmagin-Spot 29  | 37   | 467     | 5.9  | 45.4226  | 20.4  | 0.0403 | 21.4  | 0.0133 | 6.5 | 0.30 | 85.0   | 5.5  | 40.1   | 8.4  | 2234.8 | 816.9  | 85.0  | 5.5  |
| Plarmagin-Spot 31  | 161  | 41253   | 2.7  | 20.4465  | 2.4   | 0.0901 | 4.4   | 0.0134 | 3.7 | 0.84 | 85.6   | 3.1  | 87.6   | 3.7  | 143.4  | 56.1   | 85.6  | 3.1  |
| Plarmagin-Spot 3   | 93   | 772     | 2.0  | 32.5974  | 8.9   | 0.0566 | 9.7   | 0.0134 | 4.0 | 0.41 | 85.6   | 3.4  | 55.9   | 5.3  | 1090.8 | 268.6  | 85.6  | 3.4  |
| Plarmagin-Spot 147 | 131  | 2791    | 2.8  | 21.0072  | 6.3   | 0.0878 | 7.0   | 0.0134 | 3.0 | 0.43 | 85.6   | 2.6  | 85.4   | 5.7  | 79.5   | 149.3  | 85.6  | 2.6  |
| Plarmagin-Spot 215 | 119  | 1581    | 4.3  | 25.7821  | 3.7   | 0.0717 | 4.9   | 0.0134 | 3.2 | 0.66 | 85.8   | 2.7  | 70.3   | 3.3  | 431.1  | 96.1   | 85.8  | 2.7  |
| Plarmagin-Spot 163 | 134  | 5078    | 3.6  | 22.6294  | 3.0   | 0.0824 | 4.5   | 0.0135 | 3.4 | 0.75 | 86.6   | 2.9  | 80.4   | 3.5  | 100.1  | 73.6   | 86.6  | 2.9  |
| Plarmagin-Spot 22  | 83   | 22232   | 2.2  | 19.4296  | 3.3   | 0.0960 | 5.5   | 0.0135 | 4.4 | 0.80 | 86.6   | 3.8  | 93.0   | 4.9  | 261.8  | 76.2   | 86.6  | 3.8  |
| Plarmagin-Spot 39  | 88   | 1587    | 2.8  | 15.2924  | 5.4   | 0.1224 | 6.5   | 0.0136 | 3.6 | 0.56 | 86.9   | 3.1  | 117.2  | 7.2  | 787.0  | 114.0  | 86.9  | 3.1  |
| Plarmagin-Spot 83  | 64   | 1616    | 2.6  | 22.3400  | 4.5   | 0.0842 | 6.9   | 0.0136 | 5.2 | 0.76 | 87.3   | 4.5  | 82.1   | 5.4  | 68.5   | 110.2  | 87.3  | 4.5  |
| Plarmagin-Spot 236 | 162  | 1866    | 1.8  | 25.9160  | 4.5   | 0.0731 | 6.0   | 0.0137 | 3.9 | 0.65 | 88.0   | 3.4  | 71.7   | 4.1  | 444.7  | 119.7  | 88.0  | 3.4  |
| Plarmagin-Spot 115 | 243  | 2875    | 2.4  | 22.3641  | 4.4   | 0.0852 | 5.3   | 0.0138 | 3.0 | 0.57 | 88.5   | 2.6  | 83.0   | 4.2  | 71.2   | 106.4  | 88.5  | 2.6  |
| Plarmagin-Spot 131 | 119  | 3870    | 3.0  | 23.0685  | 3.2   | 0.0829 | 5.1   | 0.0139 | 3.9 | 0.77 | 88.7   | 3.4  | 80.8   | 3.9  | 147.5  | 80.5   | 88.7  | 3.4  |
| Plarmagin-Spot 169 | 65   | 3742    | 3.4  | 18.6504  | 4.7   | 0.1026 | 6.0   | 0.0139 | 3.6 | 0.61 | 88.8   | 3.2  | 99.1   | 5.6  | 355.0  | 106.8  | 88.8  | 3.2  |
| Plarmagin-Spot 276 | 172  | 7883    | 1.7  | 20.6706  | 2.5   | 0.0929 | 3.5   | 0.0139 | 2.5 | 0.71 | 89.2   | 2.2  | 90.2   | 3.0  | 117.8  | 58.7   | 89.2  | 2.2  |
| Plarmagin-Spot 198 | 121  | 4639    | 3.6  | 20.4580  | 3.0   | 0.0943 | 5.0   | 0.0140 | 4.0 | 0.80 | 89.6   | 3.6  | 91.5   | 4.4  | 142.1  | 71.3   | 89.6  | 3.6  |
| Plarmagin-Spot 238 | 65   | 1304    | 3.2  | 19.2449  | 4.9   | 0.1004 | 6.7   | 0.0140 | 4.6 | 0.68 | 89.7   | 4.1  | 97.1   | 6.2  | 283.7  | 113.0  | 89.7  | 4.1  |
| Plarmagin-Spot 299 | 43   | 22062   | 2.6  | 21.0439  | 4.5   | 0.0919 | 8.0   | 0.0140 | 6.6 | 0.83 | 89.8   | 5.9  | 89.2   | 6.9  | 75.4   | 107.6  | 89.8  | 5.9  |
| Plarmagin-Spot 79  | 131  | 1052    | 2.8  | 28.9132  | 3.2   | 0.0670 | 4.9   | 0.0140 | 3.8 | 0.77 | 89.9   | 3.4  | 65.8   | 3.1  | 741.8  | 88.6   | 89.9  | 3.4  |
| Plarmagin-Spot 148 | 57   | 861     | 3.2  | 29.2919  | 3.6   | 0.0663 | 6.0   | 0.0141 | 4.8 | 0.80 | 90.2   | 4.3  | 65.2   | 3.8  | 778.4  | 101.1  | 90.2  | 4.3  |
| Plarmagin-Spot 78  | 83   | 510     | 1.8  | 47.5202  | 26.3  | 0.0410 | 26.6  | 0.0141 | 4.2 | 0.16 | 90.4   | 3.8  | 40.8   | 10.6 | 2418.2 | 656.8  | 90.4  | 3.8  |
| Plarmagin-Spot 253 | 196  | 3924    | 2.2  | 22.8566  | 3.1   | 0.0853 | 4.2   | 0.0141 | 2.8 | 0.67 | 90.5   | 2.5  | 83.1   | 3.4  | 124.7  | 77.6   | 90.5  | 2.5  |
| Plarmagin-Spot 262 | 107  | 23854   | 1.5  | 20.7729  | 2.6   | 0.0941 | 4.2   | 0.0142 | 3.3 | 0.79 | 90.8   | 3.0  | 91.3   | 3.7  | 106.1  | 60.8   | 90.8  | 3.0  |
| Plarmagin-Spot 217 | 81   | 540     | 2.6  | 46.9982  | 67.7  | 0.0416 | 67.9  | 0.0142 | 4.7 | 0.07 | 90.9   | 4.2  | 41.4   | 27.6 | 2372.6 | 401.7  | 90.9  | 4.2  |
| Plarmagin-Spot 183 | 135  | 1518    | 1.8  | 25.3478  | 3.2   | 0.0773 | 4.7   | 0.0142 | 3.5 | 0.75 | 91.0   | 3.2  | 75.6   | 3.5  | 386.7  | 82.3   | 91.0  | 3.2  |
| Plarmagin-Spot 50  | 127  | 140849  | 1.7  | 19.1900  | 2.9   | 0.1022 | 4.3   | 0.0142 | 3.2 | 0.73 | 91.0   | 2.9  | 98.8   | 4.1  | 290.3  | 67.1   | 91.0  | 2.9  |
| Plarmagin-Spot 150 | 66   | 1117    | 12.5 | 14.4118  | 5.3   | 0.1366 | 6.7   | 0.0143 | 4.1 | 0.61 | 91.4   | 3.7  | 130.0  | 8.2  | 910.3  | 109.4  | 91.4  | 3.7  |
| Plarmagin-Spot 54  | 79   | 1904    | 2.9  | 22.6504  | 4.4   | 0.0879 | 6.3   | 0.0144 | 4.5 | 0.71 | 92.5   | 4.1  | 85.6   | 5.2  | 102.3  | 108.4  | 92.5  | 4.1  |
| Plarmagin-Spot 249 | 96   | 12632   | 2.5  | 20.4988  | 3.7   | 0.0978 | 4.9   | 0.0145 | 3.2 | 0.66 | 93.0   | 3.0  | 94.7   | 4.4  | 137.4  | 85.8   | 93.0  | 3.0  |
| Plarmagin-Spot 233 | 204  | 5996    | 3.4  | 21.0568  | 3.0   | 0.0954 | 4.0   | 0.0146 | 2.6 | 0.65 | 93.3   | 2.4  | 92.5   | 3.5  | 74.0   | 72.2   | 93.3  | 2.4  |
| Plarmagin-Spot 187 | 65   | 9361    | 2.8  | 21.2543  | 3.6   | 0.0949 | 5.5   | 0.0146 | 4.2 | 0.76 | 93.6   | 3.9  | 92.1   | 4.9  | 51.7   | 86.0   | 93.6  | 3.9  |
| Plarmagin-Spot 204 | 96   | 30134   | 1.8  | 19.7629  | 3.1   | 0.1021 | 4.7   | 0.0146 | 3.6 | 0.76 | 93.7   | 3.3  | 98.4   | 4.4  | 222.7  | 70.9   | 93.7  | 3.3  |
| Plarmagin-Spot 230 | 138  | 5620    | 2.2  | 17.6415  | 3.6   | 0.1158 | 5.5   | 0.0148 | 4.2 | 0.76 | 94.8   | 4.0  | 111.3  | 5.8  | 479.3  | 79.1   | 94.8  | 4.0  |
| Plarmagin-Spot 185 | 149  | 516     | 3.2  | 11.8831  | 5.1   | 0.1735 | 6.0   | 0.0150 | 3.2 | 0.54 | 95.7   | 3.1  | 162.5  | 9.0  | 1296.1 | 98.3   | 95.7  | 3.1  |
| Plarmagin-Spot 211 | 1253 | 211225  | 4.6  | 20.8978  | 1.1   | 0.1067 | 2.0   | 0.0162 | 1.6 | 0.82 | 103.5  | 1.6  | 103.0  | 1.9  | 92.0   | 26.6   | 103.5 | 1.6  |
| Plarmagin-Spot 66  | 728  | 10450   | 4.3  | 20.4043  | 1.7   | 0.1110 | 2.3   | 0.0164 | 1.6 | 0.70 | 105.0  | 1.7  | 106.9  | 2.4  | 148.3  | 39.0   | 105.0 | 1.7  |
| Plarmagin-Spot 287 | 892  | 214210  | 2.8  | 20.5871  | 1.0   | 0.1105 | 1.9   | 0.0165 | 1.6 | 0.85 | 105.5  | 1.7  | 106.4  | 2.0  | 127.3  | 24.1   | 105.5 | 1.7  |
| Plarmagin-Spot 250 | 147  | 2618    | 1.4  | 23.2173  | 2.9   | 0.0985 | 4.5   | 0.0166 | 3.4 | 0.76 | 106.1  | 3.6  | 95.4   | 4.1  | 163.5  | 73.1   | 106.1 | 3.6  |
| Plarmagin-Spot 243 | 492  | 2548    | 1.9  | 22.4732  | 1.5   | 0.1025 | 2.5   | 0.0167 | 2.0 | 0.79 | 106.8  | 2.1  | 99.1   | 2.4  | 83.1   | 37.3   | 106.8 | 2.1  |
| Plarmagin-Spot 144 | 1934 | 234493  | 2.1  | 20.3502  | 0.7   | 0.1134 | 1.9   | 0.0167 | 1.8 | 0.93 | 107.0  | 1.9  | 109.1  | 2.0  | 154.5  | 16.6   | 107.0 | 1.9  |
| Plarmagin-Spot 94  | 1192 | 8230    | 2.5  | 21.0777  | 1.2   | 0.1098 | 2.4   | 0.0168 | 2.1 | 0.85 | 107.3  | 2.2  | 105.7  | 2.4  | 71.6   | 29.6   | 107.3 | 2.2  |
| Plarmagin-Spot 106 | 816  | 13112   | 2.2  | 20.6811  | 1.2   | 0.1121 | 2.3   | 0.0168 | 1.9 | 0.83 | 107.5  | 2.0  | 107.9  | 2.3  | 116.6  | 29.4   | 107.5 | 2.0  |
| Plarmagin-Spot 256 | 896  | 10722   | 2.4  | 21.5861  | 1.3   | 0.1089 | 2.5   | 0.0170 | 2.1 | 0.85 | 108.9  | 2.3  | 104.9  | 2.4  | 14.6   | 30.8   | 108.9 | 2.3  |
| Plarmagin-Spot 220 | 311  | 5235    | 2.0  | 21.7035  | 1.8   | 0.1094 | 3.3   | 0.0172 | 2.7 | 0.83 | 110.1  | 3.0  | 105.5  | 3.3  | 1.6    | 44.2   | 110.1 | 3.0  |
| Plarmagin-Spot 300 | 1266 | 33573   | 5.6  | 18.0961  | 1.1   | 0.1563 | 3.1   | 0.0205 | 2.9 | 0.94 | 130.9  | 3.8  | 147.5  | 4.3  | 422.8  | 24.7   | 130.9 | 3.8  |
| Plarmagin-Spot 142 | 269  | 8308    | 2.3  | 20.4579  | 1.8   | 0.2025 | 3.1   | 0.0301 | 2.5 | 0.80 | 190.9  | 4.6  | 187.3  | 5.2  | 142.1  | 42.5   | 190.9 | 4.6  |
| Plarmagin-Spot 258 | 210  | 27458   | 4.0  | 19.1410  | 1.3   | 0.3341 | 3.2   | 0.0464 | 2.9 | 0.91 | 292.3  | 8.4  | 292.7  | 8.2  | 296.1  | 30.3   | 292.3 | 8.4  |
| Plarmagin-Spot 92  | 2090 | 62856   | 2.1  | 19.0266  | 0.6   | 0.3387 | 1.9   | 0.0467 | 1.7 | 0.94 | 294.5  | 5.0  | 296.2  | 4.8  | 309.8  | 14.7   | 294.5 | 5.0  |
| Plarmagin-Spot 95  | 741  | 19755   | 2.4  | 19.1072  | 0.8   | 0.3471 | 2.4   | 0.0481 | 2.3 | 0.94 | 302.8  | 6.8  | 302.5  | 6.4  | 300.2  | 18.6   | 302.8 | 6.8  |
| Plarmagin-Spot 309 | 203  | 17827   | 2.2  | 19.2623  | 1.5   | 0.4000 | 3.5   | 0.0559 | 3.2 | 0.90 | 350.5  | 10.7 | 341.6  | 10.2 | 281.7  | 35.0   | 350.5 | 10.7 |
| Plarmagin-Spot 213 | 361  | 99491   | 1.7  | 18.5199  | 0.9   | 0.4251 | 2.6   | 0.0571 | 2.5 | 0.94 | 358.0  | 8.7  | 359.7  | 8.0  | 370.9  | 19.5   | 358.0 | 8.7  |
| Plarmagin-Spot 291 | 144  | 7391    | 1.8  | 17.3404  | 1.3   | 0.6812 | 3.7   | 0.0857 | 3.5 | 0.93 | 529.8  | 17.7 | 527.5  | 15.3 | 517.2  | 29.5   | 529.8 | 17.7 |
| Plarmagin-Spot 47  | 521  | 210334  | 6.8  | 9.5680   | 0.7   | 4.2919 | 2.2   | 0.2978 | 2.1 | 0.95 | 1680.6 | 31.3 | 1691.8 | 18.3 | 1705.8 | 12     |       |      |

|                 |      |        |     |         |     |        |     |        |     |      |      |     |      |     |       |      |      |     |
|-----------------|------|--------|-----|---------|-----|--------|-----|--------|-----|------|------|-----|------|-----|-------|------|------|-----|
| Rocker-Spot 149 | 336  | 16196  | 1.5 | 20.6875 | 2.1 | 0.0543 | 2.7 | 0.0082 | 1.7 | 0.61 | 52.3 | 0.9 | 53.7 | 1.4 | 114.8 | 50.2 | 52.3 | 0.9 |
| Rocker-Spot 258 | 327  | 13773  | 3.6 | 21.4333 | 2.0 | 0.0542 | 2.5 | 0.0084 | 1.4 | 0.57 | 54.1 | 0.8 | 53.6 | 1.3 | 30.6  | 48.8 | 54.1 | 0.8 |
| Rocker-Spot 63  | 728  | 12840  | 2.5 | 21.4224 | 1.3 | 0.0547 | 1.8 | 0.0085 | 1.2 | 0.69 | 54.6 | 0.7 | 54.1 | 1.0 | 31.8  | 31.6 | 54.6 | 0.7 |
| Rocker-Spot 202 | 1088 | 315041 | 1.1 | 21.0445 | 1.1 | 0.0560 | 1.8 | 0.0086 | 1.4 | 0.80 | 54.9 | 0.8 | 55.4 | 1.0 | 74.3  | 25.5 | 54.9 | 0.8 |
| Rocker-Spot 190 | 448  | 32166  | 3.4 | 20.8619 | 1.5 | 0.0565 | 2.0 | 0.0086 | 1.3 | 0.67 | 54.9 | 0.7 | 55.9 | 1.1 | 95.0  | 34.4 | 54.9 | 0.7 |
| Rocker-Spot 267 | 417  | 8835   | 1.3 | 20.5281 | 2.4 | 0.0577 | 2.7 | 0.0086 | 1.3 | 0.47 | 55.2 | 0.7 | 57.0 | 1.5 | 133.1 | 56.0 | 55.2 | 0.7 |
| Rocker-Spot 236 | 1830 | 31928  | 2.7 | 20.9396 | 0.9 | 0.0570 | 1.3 | 0.0087 | 1.0 | 0.76 | 55.6 | 0.6 | 56.3 | 0.7 | 86.2  | 20.6 | 55.6 | 0.6 |
| Rocker-Spot 311 | 401  | 8027   | 2.6 | 21.8344 | 1.9 | 0.0548 | 2.3 | 0.0087 | 1.2 | 0.52 | 55.8 | 0.7 | 54.2 | 1.2 | NA    | NA   | 55.8 | 0.7 |
| Rocker-Spot 305 | 493  | 8810   | 3.6 | 21.2041 | 2.4 | 0.0565 | 2.7 | 0.0087 | 1.4 | 0.50 | 55.8 | 0.8 | 55.9 | 1.5 | 56.3  | 56.5 | 55.8 | 0.8 |
| Rocker-Spot 117 | 591  | 49795  | 3.4 | 21.3450 | 1.1 | 0.0566 | 1.8 | 0.0088 | 1.5 | 0.81 | 56.2 | 0.8 | 55.9 | 1.0 | 40.5  | 25.4 | 56.2 | 0.8 |
| Rocker-Spot 260 | 424  | 12699  | 3.8 | 21.4369 | 1.7 | 0.0569 | 2.2 | 0.0088 | 1.3 | 0.61 | 56.8 | 0.8 | 56.2 | 1.2 | 30.3  | 41.9 | 56.8 | 0.8 |
| Rocker-Spot 177 | 528  | 17530  | 2.2 | 21.0634 | 1.5 | 0.0581 | 2.0 | 0.0089 | 1.3 | 0.65 | 57.0 | 0.7 | 57.3 | 1.1 | 72.2  | 36.2 | 57.0 | 0.7 |
| Rocker-Spot 313 | 319  | 6389   | 3.5 | 21.7698 | 1.9 | 0.0562 | 2.3 | 0.0089 | 1.4 | 0.59 | 57.0 | 0.8 | 55.6 | 1.3 | NA    | NA   | 57.0 | 0.8 |
| Rocker-Spot 204 | 214  | 2387   | 2.9 | 23.1338 | 2.1 | 0.0532 | 2.4 | 0.0089 | 1.3 | 0.54 | 57.4 | 0.8 | 52.7 | 1.3 | NA    | NA   | 57.4 | 0.8 |
| Rocker-Spot 44  | 395  | 8867   | 3.2 | 21.5667 | 2.5 | 0.0572 | 2.9 | 0.0089 | 1.5 | 0.50 | 57.4 | 0.8 | 56.5 | 1.6 | 15.7  | 61.1 | 57.4 | 0.8 |
| Rocker-Spot 215 | 1207 | 28800  | 2.8 | 21.2438 | 1.3 | 0.0580 | 2.2 | 0.0089 | 1.7 | 0.80 | 57.4 | 1.0 | 57.3 | 1.2 | 51.8  | 31.0 | 57.4 | 1.0 |
| Rocker-Spot 187 | 395  | 17890  | 5.0 | 21.4545 | 1.4 | 0.0576 | 2.2 | 0.0090 | 1.7 | 0.77 | 57.5 | 1.0 | 56.8 | 1.2 | 28.3  | 33.5 | 57.5 | 1.0 |
| Rocker-Spot 23  | 1396 | 37324  | 2.6 | 21.1382 | 1.0 | 0.0587 | 1.5 | 0.0090 | 1.1 | 0.75 | 57.7 | 0.6 | 57.9 | 0.8 | 63.7  | 23.7 | 57.7 | 0.6 |
| Rocker-Spot 34  | 681  | 44298  | 4.5 | 20.7038 | 1.2 | 0.0599 | 1.9 | 0.0090 | 1.5 | 0.79 | 57.7 | 0.9 | 59.1 | 1.1 | 113.0 | 27.8 | 57.7 | 0.9 |
| Rocker-Spot 43  | 281  | 28415  | 4.1 | 20.3644 | 1.4 | 0.0609 | 1.9 | 0.0090 | 1.3 | 0.69 | 57.8 | 0.8 | 60.1 | 1.1 | 151.8 | 33.1 | 57.8 | 0.8 |
| Rocker-Spot 175 | 263  | 9623   | 3.9 | 21.1028 | 1.8 | 0.0589 | 2.1 | 0.0090 | 1.2 | 0.55 | 57.9 | 0.7 | 58.2 | 1.2 | 67.8  | 42.7 | 57.9 | 0.7 |
| Rocker-Spot 159 | 214  | 9646   | 1.8 | 21.9339 | 1.6 | 0.0567 | 1.9 | 0.0090 | 1.1 | 0.57 | 58.0 | 0.6 | 56.0 | 1.0 | NA    | NA   | 58.0 | 0.6 |
| Rocker-Spot 131 | 411  | 46558  | 2.2 | 21.4324 | 1.6 | 0.0582 | 2.1 | 0.0090 | 1.4 | 0.67 | 58.1 | 0.8 | 57.4 | 1.2 | 30.8  | 38.3 | 58.1 | 0.8 |
| Rocker-Spot 263 | 473  | 12716  | 1.6 | 21.3721 | 1.2 | 0.0584 | 1.6 | 0.0091 | 1.0 | 0.66 | 58.1 | 0.6 | 57.7 | 0.9 | 37.5  | 27.8 | 58.1 | 0.6 |
| Rocker-Spot 298 | 463  | 12586  | 5.7 | 21.6721 | 1.3 | 0.0577 | 2.1 | 0.0091 | 1.6 | 0.77 | 58.2 | 0.9 | 56.9 | 1.1 | 4.0   | 31.8 | 58.2 | 0.9 |
| Rocker-Spot 162 | 434  | 10221  | 2.3 | 21.4580 | 1.3 | 0.0584 | 2.0 | 0.0091 | 1.5 | 0.76 | 58.4 | 0.9 | 57.7 | 1.1 | 27.9  | 30.6 | 58.4 | 0.9 |
| Rocker-Spot 22  | 406  | 15661  | 5.3 | 20.9430 | 1.4 | 0.0600 | 2.3 | 0.0091 | 1.8 | 0.79 | 58.5 | 1.0 | 59.1 | 1.3 | 85.8  | 33.2 | 58.5 | 1.0 |
| Rocker-Spot 128 | 555  | 376686 | 1.4 | 20.1564 | 0.9 | 0.0623 | 1.7 | 0.0091 | 1.5 | 0.86 | 58.5 | 0.9 | 61.4 | 1.0 | 175.8 | 21.0 | 58.5 | 0.9 |
| Rocker-Spot 275 | 440  | 30971  | 5.5 | 21.0470 | 1.4 | 0.0597 | 1.8 | 0.0091 | 1.2 | 0.67 | 58.6 | 0.7 | 58.9 | 1.0 | 74.0  | 32.4 | 58.6 | 0.7 |
| Rocker-Spot 130 | 547  | 116035 | 2.1 | 20.7679 | 1.2 | 0.0606 | 1.8 | 0.0091 | 1.4 | 0.76 | 58.6 | 0.8 | 59.7 | 1.0 | 105.7 | 27.7 | 58.6 | 0.8 |
| Rocker-Spot 221 | 391  | 22278  | 3.4 | 20.3360 | 1.4 | 0.0621 | 2.0 | 0.0092 | 1.4 | 0.73 | 58.8 | 0.8 | 61.2 | 1.2 | 155.1 | 31.7 | 58.8 | 0.8 |
| Rocker-Spot 314 | 783  | 57925  | 2.7 | 17.0589 | 1.1 | 0.0740 | 1.7 | 0.0092 | 1.3 | 0.76 | 58.8 | 0.8 | 72.5 | 1.2 | 552.1 | 24.5 | 58.8 | 0.8 |
| Rocker-Spot 133 | 678  | 48123  | 2.1 | 20.7489 | 1.4 | 0.0609 | 2.0 | 0.0092 | 1.4 | 0.71 | 58.8 | 0.8 | 60.0 | 1.2 | 107.8 | 34.1 | 58.8 | 0.8 |
| Rocker-Spot 89  | 785  | 21545  | 7.8 | 20.4073 | 1.4 | 0.0620 | 1.9 | 0.0092 | 1.3 | 0.66 | 58.9 | 0.7 | 61.0 | 1.1 | 146.9 | 33.3 | 58.9 | 0.7 |
| Rocker-Spot 81  | 225  | 5176   | 2.2 | 21.6183 | 1.8 | 0.0585 | 2.2 | 0.0092 | 1.2 | 0.54 | 58.9 | 0.7 | 57.7 | 1.2 | 10.0  | 44.4 | 58.9 | 0.7 |
| Rocker-Spot 266 | 475  | 11065  | 1.1 | 21.3796 | 1.4 | 0.0592 | 1.8 | 0.0092 | 1.1 | 0.62 | 58.9 | 0.7 | 58.4 | 1.0 | 36.6  | 33.9 | 58.9 | 0.7 |
| Rocker-Spot 97  | 205  | 5920   | 2.9 | 21.7275 | 2.0 | 0.0582 | 2.4 | 0.0092 | 1.2 | 0.50 | 58.9 | 0.7 | 57.5 | 1.3 | NA    | NA   | 58.9 | 0.7 |
| Rocker-Spot 198 | 250  | 11869  | 4.8 | 21.7218 | 1.6 | 0.0584 | 1.9 | 0.0092 | 1.1 | 0.58 | 59.0 | 0.7 | 57.6 | 1.1 | NA    | NA   | 59.0 | 0.7 |
| Rocker-Spot 142 | 978  | 126024 | 3.2 | 20.7748 | 1.0 | 0.0611 | 1.5 | 0.0092 | 1.1 | 0.75 | 59.1 | 0.7 | 60.2 | 0.9 | 104.9 | 22.9 | 59.1 | 0.7 |
| Rocker-Spot 306 | 381  | 6778   | 1.8 | 21.3213 | 1.8 | 0.0596 | 2.2 | 0.0092 | 1.3 | 0.58 | 59.2 | 0.8 | 58.8 | 1.3 | 43.2  | 43.2 | 59.2 | 0.8 |
| Rocker-Spot 13  | 427  | 4307   | 6.7 | 22.4021 | 1.7 | 0.0568 | 2.3 | 0.0092 | 1.5 | 0.65 | 59.3 | 0.9 | 56.1 | 1.2 | NA    | NA   | 59.3 | 0.9 |
| Rocker-Spot 251 | 545  | 23615  | 1.6 | 20.5066 | 1.5 | 0.0623 | 2.1 | 0.0093 | 1.5 | 0.69 | 59.5 | 0.9 | 61.4 | 1.3 | 135.5 | 35.7 | 59.5 | 0.9 |
| Rocker-Spot 27  | 1941 | 94012  | 3.3 | 21.1884 | 0.9 | 0.0603 | 1.6 | 0.0093 | 1.3 | 0.82 | 59.5 | 0.8 | 59.5 | 0.9 | 58.1  | 22.0 | 59.5 | 0.8 |
| Rocker-Spot 124 | 420  | 4004   | 2.9 | 21.9054 | 1.6 | 0.0584 | 2.3 | 0.0093 | 1.7 | 0.73 | 59.6 | 1.0 | 57.6 | 1.3 | NA    | NA   | 59.6 | 1.0 |
| Rocker-Spot 140 | 1249 | 65321  | 3.9 | 21.3088 | 1.0 | 0.0600 | 1.8 | 0.0093 | 1.5 | 0.84 | 59.6 | 0.9 | 59.2 | 1.0 | 44.6  | 23.1 | 59.6 | 0.9 |
| Rocker-Spot 111 | 1016 | 61018  | 3.8 | 21.0079 | 0.9 | 0.0609 | 1.5 | 0.0093 | 1.3 | 0.82 | 59.6 | 0.7 | 60.0 | 0.9 | 78.4  | 20.8 | 59.6 | 0.7 |
| Rocker-Spot 150 | 579  | 5594   | 4.6 | 21.2937 | 1.2 | 0.0602 | 1.9 | 0.0093 | 1.4 | 0.78 | 59.6 | 0.9 | 59.3 | 1.1 | 46.3  | 28.0 | 59.6 | 0.9 |
| Rocker-Spot 71  | 372  | 18106  | 8.6 | 20.7833 | 1.8 | 0.0617 | 2.2 | 0.0093 | 1.3 | 0.58 | 59.7 | 0.7 | 60.8 | 1.3 | 103.9 | 41.8 | 59.7 | 0.7 |
| Rocker-Spot 76  | 296  | 6610   | 2.2 | 22.1173 | 3.0 | 0.0580 | 3.2 | 0.0093 | 1.3 | 0.41 | 59.8 | 0.8 | 57.3 | 1.8 | NA    | NA   | 59.8 | 0.8 |
| Rocker-Spot 84  | 626  | 26461  | 2.4 | 21.0815 | 1.1 | 0.0609 | 1.7 | 0.0093 | 1.3 | 0.77 | 59.8 | 0.8 | 60.0 | 1.0 | 70.1  | 26.4 | 59.8 | 0.8 |
| Rocker-Spot 241 | 976  | 52703  | 3.6 | 20.7823 | 1.4 | 0.0618 | 2.0 | 0.0093 | 1.4 | 0.72 | 59.8 | 0.8 | 60.9 | 1.2 | 104.0 | 32.1 | 59.8 | 0.8 |
| Rocker-Spot 39  | 532  | 44402  | 4.5 | 20.8719 | 1.6 | 0.0616 | 2.2 | 0.0093 | 1.4 | 0.66 | 59.9 | 0.9 | 60.7 | 1.3 | 93.8  | 38.8 | 59.9 | 0.9 |
| Rocker-Spot 194 | 672  | 14720  | 2.0 | 21.2027 | 1.3 | 0.0607 | 1.8 | 0.0093 | 1.2 | 0.69 | 59.9 | 0.7 | 59.8 | 1.0 | 56.5  | 30.4 | 59.9 | 0.7 |
| Rocker-Spot 200 | 613  | 55648  | 3.0 | 20.8664 | 1.4 | 0.0618 | 2.0 | 0.0094 | 1.4 | 0.68 | 60.0 | 0.8 | 60.9 | 1.2 | 94.5  | 34.3 | 60.0 | 0.8 |
| Rocker-Spot 96  | 290  | 20926  | 2.8 | 21.6071 | 1.8 | 0.0597 | 2.3 | 0.0094 | 1.4 | 0.60 | 60.0 | 0.8 | 58.8 | 1.3 | 11.2  | 44.1 | 60.0 | 0.8 |
| Rocker-Spot 208 | 98   | 1769   | 3.9 | 23.7905 | 6.6 | 0.0542 | 6.7 | 0.0094 | 1.3 | 0.19 | 60.0 | 0.8 | 53.6 | 3.5 | NA    | NA   | 60.0 | 0.8 |
| Rocker-Spot 90  | 662  | 6753   | 1.8 | 22.0274 | 1.0 | 0.0586 | 1.8 | 0.0094 | 1.4 | 0.81 | 60.0 | 0.9 | 57.8 | 1.0 | NA    | NA   | 60.0 | 0.9 |
| Rocker-Spot 11  | 177  | 4129   | 3.1 | 23.2122 | 2.6 | 0.0556 | 3.0 | 0.0094 | 1.5 | 0.51 | 60.1 | 0.9 | 54.9 | 1.6 | NA    | NA   | 60.1 | 0.9 |
| Rocker-Spot 171 | 195  | 16144  | 3.1 | 21.1736 | 1.8 | 0.0610 | 2.3 | 0.0094 | 1.5 | 0.63 | 60.1 | 0.9 | 60.1 | 1.4 | 59.8  | 43.6 | 60.1 | 0.9 |
| Rocker-Spot 147 | 262  | 7536   | 3.3 | 21.6033 | 2.8 | 0.0598 | 3.2 | 0.0094 | 1.5 | 0.46 | 60.1 | 0.9 | 59.0 | 1.8 | 11.6  | 68.0 | 60.1 | 0.9 |
| Rocker-Spot 6   | 179  | 8868   | 2.7 | 21.2758 | 2.2 | 0.0608 | 2.6 | 0.0094 | 1.2 | 0.47 | 60.2 | 0.7 | 59.9 | 1.5 | 48.3  | 53.7 | 60.2 | 0.7 |
| Rocker-Spot 48  | 924  | 16890  | 7.8 | 21.2955 | 1.2 | 0.0608 | 1.8 | 0.0094 | 1.3 | 0.72 | 60.3 | 0.8 | 59.9 | 1.0 | 46.0  | 29.3 | 60.3 | 0.8 |
| Rocker-Spot 302 | 619  | 35895  | 1.7 | 19.5593 | 2.1 | 0.0662 | 2.4 | 0.0094 | 1.2 | 0.49 | 60.3 | 0.7 | 65.1 | 1.5 | 245.5 | 48.2 | 60.3 | 0.7 |
| Rocker-Spot 116 | 515  | 118352 | 6.0 | 21.1023 | 1.5 | 0.0614 | 2.2 | 0.0094 | 1.5 | 0.71 | 60.3 | 0.9 | 60.5 | 1.3 | 67.8  | 35.9 | 60.3 | 0.9 |
| Rocker-Spot 35  | 395  | 26522  | 4.6 | 20.7988 | 1.4 | 0.0623 | 2.2 | 0.0094 | 1.7 | 0.76 | 60.3 | 1.0 | 61.3 | 1.3 | 102.2 | 33.7 | 60.3 | 1.0 |
| Rocker-Spot 137 | 567  | 18254  | 5.2 | 20.8551 | 1.1 | 0.0621 | 1.7 | 0.0094 | 1.3 | 0.78 | 60.3 | 0.8 | 61.2 | 1.0 | 95.8  | 25.9 | 60.3 | 0.8 |
| Rocker-Spot 4   | 242  | 6440   | 2.0 | 22.5618 | 1.7 | 0.0575 | 2.2 | 0.0094 | 1.5 | 0.67 | 60.3 | 0.9 | 56.7 | 1.2 | NA    | NA   | 60.3 | 0.9 |
| Rocker-Spot 195 | 377  | 5868   | 4.3 | 22.1753 | 1.3 | 0.0585 | 2.1 | 0.0094 | 1.6 | 0.77 | 60.3 | 1.0 | 57.7 | 1.2 | NA    | NA   | 60.3 | 1.0 |
| Rocker-Spot 262 | 346  | 14856  | 3.0 | 21.2041 | 1.7 | 0.0612 | 2.2 | 0.0094 | 1.4 | 0.66 | 60.5 | 0.9 | 60.4 | 1.3 | 56.3  | 39.5 | 60.5 | 0.9 |
| Rocker-Spot 250 | 298  | 47241  | 2.2 | 20.6690 | 1.4 | 0.0628 | 2.0 | 0.0094 | 1.4 | 0.69 |      |     |      |     |       |      |      |     |

|                 |      |        |     |         |     |        |     |        |     |      |      |     |      |     |       |      |      |     |
|-----------------|------|--------|-----|---------|-----|--------|-----|--------|-----|------|------|-----|------|-----|-------|------|------|-----|
| Rocker-Spot 167 | 868  | 48327  | 2.7 | 18.6560 | 2.0 | 0.0700 | 2.3 | 0.0095 | 1.1 | 0.50 | 60.8 | 0.7 | 68.7 | 1.5 | 353.4 | 44.8 | 60.8 | 0.7 |
| Rocker-Spot 5   | 817  | 112905 | 5.3 | 21.0882 | 1.3 | 0.0620 | 2.0 | 0.0095 | 1.6 | 0.77 | 60.8 | 0.9 | 61.0 | 1.2 | 69.4  | 30.8 | 60.8 | 0.9 |
| Rocker-Spot 2   | 113  | 12987  | 3.4 | 21.1597 | 2.5 | 0.0618 | 2.8 | 0.0095 | 1.4 | 0.48 | 60.9 | 0.8 | 60.9 | 1.7 | 61.3  | 59.4 | 60.9 | 0.8 |
| Rocker-Spot 213 | 280  | 382142 | 4.4 | 17.1560 | 3.1 | 0.0763 | 3.4 | 0.0095 | 1.5 | 0.44 | 60.9 | 0.9 | 74.6 | 2.5 | 539.7 | 67.2 | 60.9 | 0.9 |
| Rocker-Spot 295 | 421  | 14627  | 2.9 | 21.3476 | 1.8 | 0.0613 | 2.2 | 0.0095 | 1.3 | 0.60 | 60.9 | 0.8 | 60.4 | 1.3 | 40.3  | 42.2 | 60.9 | 0.8 |
| Rocker-Spot 92  | 154  | 6475   | 2.9 | 21.3186 | 2.4 | 0.0614 | 2.7 | 0.0095 | 1.3 | 0.48 | 60.9 | 0.8 | 60.5 | 1.6 | 43.5  | 56.5 | 60.9 | 0.8 |
| Rocker-Spot 20  | 393  | 28503  | 5.7 | 21.1750 | 1.3 | 0.0619 | 1.9 | 0.0095 | 1.4 | 0.73 | 61.0 | 0.8 | 60.9 | 1.1 | 59.6  | 31.2 | 61.0 | 0.8 |
| Rocker-Spot 61  | 745  | 27657  | 2.6 | 20.6173 | 1.9 | 0.0636 | 2.5 | 0.0095 | 1.6 | 0.66 | 61.0 | 1.0 | 62.6 | 1.5 | 122.8 | 43.8 | 61.0 | 1.0 |
| Rocker-Spot 216 | 115  | 4383   | 3.1 | 22.4473 | 2.7 | 0.0585 | 3.0 | 0.0095 | 1.4 | 0.46 | 61.1 | 0.8 | 57.7 | 1.7 | NA    | NA   | 61.1 | 0.8 |
| Rocker-Spot 98  | 226  | 13633  | 2.0 | 21.1588 | 1.9 | 0.0621 | 2.4 | 0.0095 | 1.4 | 0.57 | 61.2 | 0.8 | 61.2 | 1.4 | 61.5  | 46.4 | 61.2 | 0.8 |
| Rocker-Spot 78  | 740  | 11120  | 3.1 | 18.8126 | 2.2 | 0.0698 | 2.6 | 0.0095 | 1.5 | 0.57 | 61.2 | 0.9 | 68.5 | 1.7 | 334.5 | 49.1 | 61.2 | 0.9 |
| Rocker-Spot 109 | 802  | 63953  | 2.7 | 19.9098 | 1.6 | 0.0660 | 1.9 | 0.0095 | 1.1 | 0.59 | 61.2 | 0.7 | 64.9 | 1.2 | 204.5 | 36.6 | 61.2 | 0.7 |
| Rocker-Spot 79  | 191  | 5961   | 1.9 | 21.4397 | 2.1 | 0.0614 | 2.5 | 0.0095 | 1.3 | 0.52 | 61.3 | 0.8 | 60.5 | 1.5 | 29.9  | 51.4 | 61.3 | 0.8 |
| Rocker-Spot 145 | 134  | 12035  | 3.6 | 20.8439 | 2.5 | 0.0632 | 2.7 | 0.0096 | 1.0 | 0.38 | 61.3 | 0.6 | 62.2 | 1.6 | 97.0  | 59.3 | 61.3 | 0.6 |
| Rocker-Spot 122 | 143  | 4500   | 3.3 | 21.5211 | 2.6 | 0.0612 | 2.9 | 0.0096 | 1.2 | 0.42 | 61.3 | 0.7 | 60.3 | 1.7 | 20.8  | 62.4 | 61.3 | 0.7 |
| Rocker-Spot 281 | 1016 | 50603  | 3.0 | 20.8920 | 1.3 | 0.0631 | 2.0 | 0.0096 | 1.5 | 0.75 | 61.4 | 0.9 | 62.1 | 1.2 | 91.6  | 31.8 | 61.4 | 0.9 |
| Rocker-Spot 164 | 136  | 6881   | 3.0 | 21.4753 | 2.6 | 0.0614 | 2.9 | 0.0096 | 1.3 | 0.43 | 61.4 | 0.8 | 60.5 | 1.7 | 26.0  | 63.0 | 61.4 | 0.8 |
| Rocker-Spot 189 | 631  | 24329  | 4.5 | 21.1879 | 1.2 | 0.0622 | 1.8 | 0.0096 | 1.4 | 0.77 | 61.4 | 0.8 | 61.3 | 1.1 | 58.1  | 27.6 | 61.4 | 0.8 |
| Rocker-Spot 158 | 342  | 9981   | 2.1 | 21.0364 | 1.2 | 0.0627 | 1.9 | 0.0096 | 1.4 | 0.74 | 61.4 | 0.8 | 61.8 | 1.1 | 75.2  | 29.4 | 61.4 | 0.8 |
| Rocker-Spot 184 | 2275 | 10524  | 1.1 | 17.4016 | 2.2 | 0.0759 | 2.7 | 0.0096 | 1.6 | 0.58 | 61.5 | 1.0 | 74.3 | 2.0 | 508.5 | 49.1 | 61.5 | 1.0 |
| Rocker-Spot 33  | 463  | 14827  | 3.0 | 20.9327 | 1.4 | 0.0631 | 2.0 | 0.0096 | 1.4 | 0.72 | 61.5 | 0.9 | 62.1 | 1.2 | 87.0  | 32.2 | 61.5 | 0.9 |
| Rocker-Spot 160 | 184  | 5434   | 2.3 | 22.6042 | 2.6 | 0.0584 | 2.7 | 0.0096 | 0.8 | 0.30 | 61.5 | 0.5 | 57.7 | 1.5 | NA    | NA   | 61.5 | 0.5 |
| Rocker-Spot 218 | 903  | 39817  | 2.2 | 21.0251 | 1.2 | 0.0628 | 1.8 | 0.0096 | 1.3 | 0.74 | 61.5 | 0.8 | 61.9 | 1.1 | 76.5  | 28.4 | 61.5 | 0.8 |
| Rocker-Spot 211 | 212  | 5838   | 2.8 | 19.9954 | 3.2 | 0.0662 | 3.8 | 0.0096 | 2.2 | 0.57 | 61.6 | 1.3 | 65.1 | 2.4 | 194.5 | 73.5 | 61.6 | 1.3 |
| Rocker-Spot 193 | 510  | 90780  | 2.9 | 21.0994 | 1.3 | 0.0628 | 1.9 | 0.0096 | 1.4 | 0.75 | 61.7 | 0.9 | 61.8 | 1.2 | 68.1  | 30.2 | 61.7 | 0.9 |
| Rocker-Spot 169 | 195  | 12222  | 3.1 | 21.3496 | 2.1 | 0.0620 | 2.5 | 0.0096 | 1.3 | 0.54 | 61.7 | 0.8 | 61.1 | 1.5 | 40.0  | 49.8 | 61.7 | 0.8 |
| Rocker-Spot 288 | 1080 | 72001  | 4.0 | 21.0808 | 1.1 | 0.0628 | 1.7 | 0.0096 | 1.3 | 0.77 | 61.7 | 0.8 | 61.9 | 1.0 | 70.2  | 25.4 | 61.7 | 0.8 |
| Rocker-Spot 229 | 544  | 25529  | 3.1 | 21.4531 | 1.5 | 0.0618 | 2.3 | 0.0096 | 1.7 | 0.74 | 61.7 | 1.1 | 60.9 | 1.4 | 28.4  | 36.9 | 61.7 | 1.1 |
| Rocker-Spot 163 | 546  | 292415 | 5.1 | 20.3034 | 1.4 | 0.0653 | 2.0 | 0.0096 | 1.5 | 0.73 | 61.8 | 0.9 | 64.3 | 1.3 | 158.9 | 32.3 | 61.8 | 0.9 |
| Rocker-Spot 201 | 210  | 28765  | 6.2 | 19.8874 | 2.0 | 0.0667 | 2.6 | 0.0096 | 1.6 | 0.62 | 61.8 | 1.0 | 65.6 | 1.7 | 207.1 | 47.4 | 61.8 | 1.0 |
| Rocker-Spot 99  | 140  | 2686   | 2.2 | 22.3671 | 2.2 | 0.0593 | 2.5 | 0.0096 | 1.2 | 0.48 | 61.8 | 0.8 | 58.5 | 1.4 | NA    | NA   | 61.8 | 0.8 |
| Rocker-Spot 181 | 1709 | 268588 | 3.4 | 20.9436 | 1.0 | 0.0637 | 1.7 | 0.0097 | 1.4 | 0.82 | 62.1 | 0.9 | 62.7 | 1.0 | 85.8  | 23.0 | 62.1 | 0.9 |
| Rocker-Spot 161 | 801  | 16948  | 5.5 | 21.3814 | 1.4 | 0.0624 | 1.9 | 0.0097 | 1.2 | 0.65 | 62.1 | 0.8 | 61.5 | 1.1 | 36.4  | 34.2 | 62.1 | 0.8 |
| Rocker-Spot 70  | 545  | 82713  | 3.8 | 21.3622 | 1.2 | 0.0629 | 1.7 | 0.0097 | 1.2 | 0.69 | 62.5 | 0.7 | 61.9 | 1.0 | 38.6  | 29.7 | 62.5 | 0.7 |
| Rocker-Spot 56  | 562  | 25772  | 1.8 | 21.3783 | 1.2 | 0.0629 | 1.9 | 0.0098 | 1.5 | 0.78 | 62.6 | 0.9 | 61.9 | 1.1 | 36.8  | 28.3 | 62.6 | 0.9 |
| Rocker-Spot 244 | 356  | 7486   | 3.0 | 21.9965 | 1.7 | 0.0612 | 2.2 | 0.0098 | 1.4 | 0.64 | 62.7 | 0.9 | 60.3 | 1.3 | NA    | NA   | 62.7 | 0.9 |
| Rocker-Spot 66  | 135  | 6722   | 2.7 | 20.1699 | 2.4 | 0.0668 | 2.7 | 0.0098 | 1.4 | 0.51 | 62.7 | 0.9 | 65.7 | 1.7 | 174.3 | 54.9 | 62.7 | 0.9 |
| Rocker-Spot 283 | 108  | 3039   | 2.5 | 23.4657 | 2.6 | 0.0574 | 3.0 | 0.0098 | 1.5 | 0.51 | 62.7 | 0.9 | 56.7 | 1.6 | NA    | NA   | 62.7 | 0.9 |
| Rocker-Spot 165 | 282  | 109754 | 5.7 | 20.7352 | 2.0 | 0.0650 | 2.5 | 0.0098 | 1.6 | 0.61 | 62.7 | 1.0 | 64.0 | 1.6 | 109.4 | 47.5 | 62.7 | 1.0 |
| Rocker-Spot 146 | 446  | 30851  | 5.1 | 21.1369 | 1.4 | 0.0640 | 2.1 | 0.0098 | 1.6 | 0.75 | 63.0 | 1.0 | 63.0 | 1.3 | 63.9  | 33.3 | 63.0 | 1.0 |
| Rocker-Spot 225 | 158  | 4090   | 3.6 | 22.5360 | 2.3 | 0.0600 | 2.6 | 0.0098 | 1.2 | 0.47 | 63.0 | 0.8 | 59.2 | 1.5 | NA    | NA   | 63.0 | 0.8 |
| Rocker-Spot 227 | 361  | 8795   | 3.1 | 21.5760 | 1.8 | 0.0628 | 2.4 | 0.0098 | 1.6 | 0.68 | 63.0 | 1.0 | 61.8 | 1.4 | 14.7  | 42.2 | 63.0 | 1.0 |
| Rocker-Spot 59  | 535  | 18513  | 3.0 | 21.0416 | 1.5 | 0.0644 | 1.9 | 0.0098 | 1.2 | 0.64 | 63.1 | 0.8 | 63.4 | 1.2 | 74.7  | 35.4 | 63.1 | 0.8 |
| Rocker-Spot 233 | 670  | 133998 | 3.4 | 21.1897 | 1.2 | 0.0642 | 1.8 | 0.0099 | 1.4 | 0.75 | 63.3 | 0.9 | 63.1 | 1.1 | 57.9  | 28.2 | 63.3 | 0.9 |
| Rocker-Spot 144 | 118  | 3966   | 2.5 | 22.9774 | 2.6 | 0.0592 | 3.0 | 0.0099 | 1.4 | 0.48 | 63.3 | 0.9 | 58.4 | 1.7 | NA    | NA   | 63.3 | 0.9 |
| Rocker-Spot 191 | 875  | 15647  | 8.9 | 21.3587 | 1.4 | 0.0637 | 2.0 | 0.0099 | 1.3 | 0.68 | 63.4 | 0.8 | 62.7 | 1.2 | 39.0  | 34.7 | 63.4 | 0.8 |
| Rocker-Spot 252 | 1011 | 29562  | 5.6 | 21.2400 | 0.9 | 0.0641 | 1.7 | 0.0099 | 1.5 | 0.85 | 63.4 | 0.9 | 63.1 | 1.0 | 52.3  | 21.2 | 63.4 | 0.9 |
| Rocker-Spot 291 | 731  | 468605 | 2.5 | 20.4452 | 1.2 | 0.0666 | 1.8 | 0.0099 | 1.3 | 0.75 | 63.4 | 0.9 | 65.5 | 1.1 | 142.5 | 27.8 | 63.4 | 0.9 |
| Rocker-Spot 196 | 1569 | 29048  | 4.2 | 21.1396 | 1.0 | 0.0645 | 1.8 | 0.0099 | 1.5 | 0.84 | 63.5 | 0.9 | 63.5 | 1.1 | 63.6  | 23.5 | 63.5 | 0.9 |
| Rocker-Spot 103 | 542  | 11430  | 3.1 | 21.4903 | 1.1 | 0.0635 | 1.7 | 0.0099 | 1.3 | 0.76 | 63.5 | 0.8 | 62.5 | 1.0 | 24.3  | 26.5 | 63.5 | 0.8 |
| Rocker-Spot 53  | 191  | 10057  | 2.5 | 21.7520 | 2.2 | 0.0628 | 2.4 | 0.0099 | 1.0 | 0.43 | 63.6 | 0.7 | 61.9 | 1.4 | NA    | NA   | 63.6 | 0.7 |
| Rocker-Spot 257 | 663  | 171694 | 2.1 | 19.8534 | 1.3 | 0.0689 | 2.0 | 0.0099 | 1.5 | 0.75 | 63.7 | 1.0 | 67.7 | 1.3 | 211.1 | 31.1 | 63.7 | 1.0 |
| Rocker-Spot 36  | 331  | 11557  | 1.9 | 21.5559 | 1.5 | 0.0635 | 2.0 | 0.0099 | 1.3 | 0.67 | 63.7 | 0.8 | 62.5 | 1.2 | 16.9  | 35.7 | 63.7 | 0.8 |
| Rocker-Spot 226 | 116  | 3983   | 3.6 | 21.9811 | 3.7 | 0.0623 | 3.9 | 0.0099 | 1.1 | 0.29 | 63.7 | 0.7 | 61.4 | 2.3 | NA    | NA   | 63.7 | 0.7 |
| Rocker-Spot 60  | 1023 | 23360  | 2.4 | 18.6801 | 2.0 | 0.0733 | 2.4 | 0.0099 | 1.4 | 0.58 | 63.7 | 0.9 | 71.8 | 1.7 | 350.5 | 44.4 | 63.7 | 0.9 |
| Rocker-Spot 168 | 1196 | 25893  | 8.0 | 20.9256 | 1.2 | 0.0655 | 1.9 | 0.0099 | 1.4 | 0.76 | 63.7 | 0.9 | 64.4 | 1.2 | 87.8  | 28.8 | 63.7 | 0.9 |
| Rocker-Spot 132 | 119  | 5138   | 1.9 | 22.4093 | 3.0 | 0.0611 | 3.2 | 0.0099 | 1.3 | 0.40 | 63.8 | 0.8 | 60.3 | 1.9 | NA    | NA   | 63.8 | 0.8 |
| Rocker-Spot 240 | 418  | 15601  | 2.3 | 19.8394 | 2.8 | 0.0691 | 3.0 | 0.0099 | 1.1 | 0.38 | 63.8 | 0.7 | 67.8 | 2.0 | 212.7 | 64.3 | 63.8 | 0.7 |
| Rocker-Spot 199 | 840  | 35055  | 4.7 | 20.8521 | 1.2 | 0.0658 | 1.7 | 0.0100 | 1.2 | 0.72 | 63.8 | 0.8 | 64.7 | 1.1 | 96.1  | 28.1 | 63.8 | 0.8 |
| Rocker-Spot 94  | 550  | 7830   | 3.7 | 21.8745 | 1.4 | 0.0628 | 2.5 | 0.0100 | 2.1 | 0.82 | 63.9 | 1.3 | 61.8 | 1.5 | NA    | NA   | 63.9 | 1.3 |
| Rocker-Spot 282 | 696  | 12116  | 5.3 | 21.7038 | 1.7 | 0.0633 | 2.0 | 0.0100 | 1.1 | 0.54 | 63.9 | 0.7 | 62.3 | 1.2 | NA    | NA   | 63.9 | 0.7 |
| Rocker-Spot 80  | 209  | 26385  | 2.1 | 20.1526 | 1.7 | 0.0682 | 2.3 | 0.0100 | 1.5 | 0.68 | 64.0 | 1.0 | 67.0 | 1.5 | 176.3 | 38.6 | 64.0 | 1.0 |
| Rocker-Spot 230 | 1044 | 40146  | 5.4 | 20.8059 | 1.0 | 0.0662 | 1.8 | 0.0100 | 1.6 | 0.85 | 64.1 | 1.0 | 65.1 | 1.2 | 101.3 | 23.2 | 64.1 | 1.0 |
| Rocker-Spot 284 | 184  | 6809   | 3.0 | 15.3595 | 4.0 | 0.0897 | 4.2 | 0.0100 | 1.2 | 0.29 | 64.1 | 0.8 | 87.3 | 3.5 | 776.8 | 84.8 | 64.1 | 0.8 |
| Rocker-Spot 136 | 896  | 15107  | 4.5 | 18.9224 | 2.0 | 0.0730 | 2.3 | 0.0100 | 1.3 | 0.54 | 64.3 | 0.8 | 71.5 | 1.6 | 321.3 | 44.9 | 64.3 | 0.8 |
| Rocker-Spot 141 | 358  | 207665 | 4.4 | 20.2653 | 1.4 | 0.0682 | 1.9 | 0.0100 | 1.3 | 0.68 | 64.3 | 0.9 | 67.0 | 1.3 | 163.2 | 33.4 | 64.3 | 0.9 |
| Rocker-Spot 178 | 356  | 22426  | 4.4 | 20.4903 | 1.6 | 0.0675 | 2.1 | 0.0100 | 1.4 | 0.66 | 64.4 | 0.9 | 66.3 | 1.3 | 137.4 | 36.7 | 64.4 | 0.9 |
| Rocker-Spot 69  | 585  | 11932  | 2.5 | 21.5204 | 1.4 | 0.0645 | 1.9 | 0.0101 | 1.3 | 0.69 | 64.6 | 0.8 | 63.4 | 1.2 | 20.9  | 32.6 | 64.6 | 0.8 |
| Rocker-Spot 245 | 2116 | 214108 | 3.4 | 20.7760 | 0.8 | 0.0668 | 1.4 | 0.0101 | 1.1 | 0.82 | 64.6 | 0.7 | 65.6 | 0.9 | 104.8 | 18.7 | 64.6 | 0.7 |
| Rocker-Spot 28  | 456  | 9730   | 4.3 | 19.0461 | 2.4 | 0.0730 | 3.4 |        |     |      |      |     |      |     |       |      |      |     |

|                 |      |        |      |         |      |        |      |        |     |      |      |     |       |      |        |        |      |     |
|-----------------|------|--------|------|---------|------|--------|------|--------|-----|------|------|-----|-------|------|--------|--------|------|-----|
| Rocker-Spot 182 | 485  | 98864  | 5.0  | 20.7619 | 1.4  | 0.0677 | 2.0  | 0.0102 | 1.4 | 0.71 | 65.5 | 0.9 | 66.6  | 1.3  | 106.3  | 32.9   | 65.5 | 0.9 |
| Rocker-Spot 10  | 331  | 17443  | 5.0  | 21.1736 | 1.3  | 0.0665 | 2.0  | 0.0102 | 1.6 | 0.77 | 65.6 | 1.0 | 65.4  | 1.3  | 59.8   | 30.8   | 65.6 | 1.0 |
| Rocker-Spot 126 | 1204 | 38899  | 4.0  | 20.9185 | 1.0  | 0.0674 | 1.5  | 0.0102 | 1.1 | 0.74 | 65.6 | 0.7 | 66.2  | 1.0  | 88.6   | 24.6   | 65.6 | 0.7 |
| Rocker-Spot 58  | 186  | 4525   | 2.1  | 21.4681 | 2.2  | 0.0657 | 2.6  | 0.0102 | 1.3 | 0.50 | 65.6 | 0.8 | 64.6  | 1.6  | 26.7   | 53.6   | 65.6 | 0.8 |
| Rocker-Spot 85  | 374  | 15792  | 6.1  | 21.0776 | 1.6  | 0.0669 | 2.0  | 0.0102 | 1.2 | 0.59 | 65.6 | 0.8 | 65.8  | 1.3  | 70.6   | 38.5   | 65.6 | 0.8 |
| Rocker-Spot 115 | 2253 | 122857 | 5.4  | 20.9407 | 0.8  | 0.0675 | 1.5  | 0.0103 | 1.3 | 0.85 | 65.8 | 0.8 | 66.4  | 0.9  | 86.1   | 18.5   | 65.8 | 0.8 |
| Rocker-Spot 270 | 168  | 411956 | 3.4  | 20.8801 | 2.1  | 0.0678 | 2.4  | 0.0103 | 1.2 | 0.49 | 65.9 | 0.8 | 66.7  | 1.5  | 92.9   | 49.0   | 65.9 | 0.8 |
| Rocker-Spot 309 | 618  | 121076 | 4.8  | 20.4918 | 1.4  | 0.0692 | 1.9  | 0.0103 | 1.2 | 0.66 | 66.0 | 0.8 | 67.9  | 1.2  | 137.2  | 33.1   | 66.0 | 0.8 |
| Rocker-Spot 12  | 490  | 12316  | 4.5  | 21.2001 | 1.0  | 0.0670 | 1.7  | 0.0103 | 1.4 | 0.83 | 66.1 | 0.9 | 65.8  | 1.1  | 56.8   | 23.5   | 66.1 | 0.9 |
| Rocker-Spot 88  | 408  | 25086  | 5.2  | 20.7303 | 1.4  | 0.0686 | 1.8  | 0.0103 | 1.2 | 0.68 | 66.2 | 0.8 | 67.4  | 1.2  | 110.0  | 32.0   | 66.2 | 0.8 |
| Rocker-Spot 294 | 844  | 61140  | 4.4  | 21.0902 | 0.9  | 0.0675 | 1.5  | 0.0103 | 1.2 | 0.79 | 66.3 | 0.8 | 66.3  | 1.0  | 69.2   | 22.1   | 66.3 | 0.8 |
| Rocker-Spot 255 | 1291 | 40509  | 16.0 | 21.2493 | 1.0  | 0.0670 | 1.7  | 0.0103 | 1.4 | 0.82 | 66.3 | 0.9 | 65.9  | 1.1  | 51.2   | 23.7   | 66.3 | 0.9 |
| Rocker-Spot 254 | 273  | 18145  | 4.7  | 21.3010 | 2.0  | 0.0669 | 2.6  | 0.0103 | 1.7 | 0.65 | 66.3 | 1.1 | 65.7  | 1.7  | 45.5   | 46.9   | 66.3 | 1.1 |
| Rocker-Spot 210 | 667  | 17035  | 6.0  | 21.0453 | 1.5  | 0.0679 | 1.9  | 0.0104 | 1.1 | 0.60 | 66.5 | 0.8 | 66.7  | 1.2  | 74.2   | 35.8   | 66.5 | 0.8 |
| Rocker-Spot 19  | 339  | 9082   | 5.1  | 21.7841 | 1.5  | 0.0656 | 2.1  | 0.0104 | 1.5 | 0.72 | 66.5 | 1.0 | 64.5  | 1.3  | NA     | NA     | 66.5 | 1.0 |
| Rocker-Spot 299 | 421  | 282022 | 5.6  | 19.2153 | 1.6  | 0.0747 | 2.1  | 0.0104 | 1.3 | 0.63 | 66.8 | 0.9 | 73.2  | 1.5  | 286.3  | 36.9   | 66.8 | 0.9 |
| Rocker-Spot 51  | 369  | 7152   | 2.3  | 16.7575 | 1.6  | 0.0859 | 2.3  | 0.0104 | 1.7 | 0.74 | 67.0 | 1.1 | 83.7  | 1.9  | 590.9  | 33.7   | 67.0 | 1.1 |
| Rocker-Spot 112 | 894  | 17373  | 4.1  | 21.3558 | 1.1  | 0.0678 | 1.8  | 0.0105 | 1.4 | 0.79 | 67.4 | 1.0 | 66.6  | 1.2  | 39.3   | 26.7   | 67.4 | 1.0 |
| Rocker-Spot 239 | 419  | 25226  | 3.4  | 21.2279 | 1.5  | 0.0683 | 2.3  | 0.0105 | 1.7 | 0.76 | 67.5 | 1.2 | 67.1  | 1.5  | 53.7   | 35.9   | 67.5 | 1.2 |
| Rocker-Spot 151 | 560  | 29759  | 2.3  | 20.3845 | 2.2  | 0.0715 | 2.5  | 0.0106 | 1.3 | 0.51 | 67.8 | 0.9 | 70.1  | 1.7  | 149.5  | 51.1   | 67.8 | 0.9 |
| Rocker-Spot 172 | 275  | 13377  | 3.2  | 20.5325 | 1.3  | 0.0711 | 1.9  | 0.0106 | 1.4 | 0.73 | 67.9 | 0.9 | 69.7  | 1.2  | 132.5  | 29.7   | 67.9 | 0.9 |
| Rocker-Spot 139 | 206  | 9627   | 2.3  | 7.7981  | 16.8 | 0.1873 | 17.1 | 0.0106 | 3.3 | 0.19 | 67.9 | 2.2 | 174.3 | 27.4 | 2073.2 | 297.4  | 67.9 | 2.2 |
| Rocker-Spot 232 | 381  | 110176 | 6.3  | 20.4673 | 1.6  | 0.0714 | 2.4  | 0.0106 | 1.7 | 0.73 | 68.0 | 1.2 | 70.0  | 1.6  | 140.0  | 37.8   | 68.0 | 1.2 |
| Rocker-Spot 170 | 374  | 16703  | 6.1  | 20.5578 | 1.5  | 0.0711 | 2.0  | 0.0106 | 1.4 | 0.68 | 68.0 | 0.9 | 69.7  | 1.4  | 129.6  | 34.7   | 68.0 | 0.9 |
| Rocker-Spot 312 | 264  | 6846   | 3.4  | 21.2473 | 2.2  | 0.0690 | 2.8  | 0.0106 | 1.7 | 0.61 | 68.2 | 1.1 | 67.8  | 1.8  | 51.5   | 52.0   | 68.2 | 1.1 |
| Rocker-Spot 75  | 128  | 11294  | 3.5  | 21.5503 | 2.4  | 0.0681 | 2.7  | 0.0107 | 1.2 | 0.45 | 68.3 | 0.8 | 66.9  | 1.7  | 17.5   | 57.4   | 68.3 | 0.8 |
| Rocker-Spot 310 | 220  | 5686   | 4.9  | 22.0093 | 1.7  | 0.0667 | 2.0  | 0.0107 | 1.1 | 0.52 | 68.3 | 0.7 | 65.6  | 1.3  | NA     | NA     | 68.3 | 0.7 |
| Rocker-Spot 280 | 792  | 19586  | 3.3  | 21.4017 | 1.1  | 0.0686 | 1.8  | 0.0107 | 1.4 | 0.78 | 68.4 | 1.0 | 67.4  | 1.2  | 34.2   | 27.0   | 68.4 | 1.0 |
| Rocker-Spot 272 | 362  | 30672  | 4.9  | 21.0052 | 1.2  | 0.0701 | 1.8  | 0.0107 | 1.4 | 0.75 | 68.5 | 0.9 | 68.8  | 1.2  | 78.7   | 29.0   | 68.5 | 0.9 |
| Rocker-Spot 157 | 308  | 14194  | 3.9  | 21.4171 | 1.8  | 0.0688 | 2.3  | 0.0107 | 1.4 | 0.60 | 68.6 | 0.9 | 67.6  | 1.5  | 32.4   | 43.5   | 68.6 | 0.9 |
| Rocker-Spot 173 | 335  | 65285  | 4.3  | 20.2801 | 1.7  | 0.0729 | 2.4  | 0.0107 | 1.7 | 0.70 | 68.8 | 1.1 | 71.4  | 1.6  | 161.6  | 39.8   | 68.8 | 1.1 |
| Rocker-Spot 30  | 150  | 3408   | 2.2  | 22.6728 | 2.2  | 0.0652 | 2.5  | 0.0107 | 1.2 | 0.48 | 68.8 | 0.8 | 64.1  | 1.6  | NA     | NA     | 68.8 | 0.8 |
| Rocker-Spot 62  | 1656 | 33863  | 3.7  | 20.8565 | 1.0  | 0.0712 | 1.5  | 0.0108 | 1.1 | 0.73 | 69.1 | 0.7 | 69.8  | 1.0  | 95.6   | 24.2   | 69.1 | 0.7 |
| Rocker-Spot 77  | 470  | 8996   | 5.4  | 21.3371 | 1.6  | 0.0696 | 2.3  | 0.0108 | 1.7 | 0.72 | 69.1 | 1.2 | 68.3  | 1.5  | 41.4   | 38.6   | 69.1 | 1.2 |
| Rocker-Spot 186 | 677  | 114884 | 2.2  | 20.9155 | 1.3  | 0.0711 | 1.8  | 0.0108 | 1.3 | 0.68 | 69.2 | 0.9 | 69.8  | 1.2  | 88.9   | 31.8   | 69.2 | 0.9 |
| Rocker-Spot 183 | 359  | 14118  | 3.3  | 20.7493 | 1.8  | 0.0719 | 2.3  | 0.0108 | 1.4 | 0.61 | 69.4 | 1.0 | 70.5  | 1.5  | 107.8  | 42.1   | 69.4 | 1.0 |
| Rocker-Spot 87  | 361  | 5730   | 3.6  | 23.1526 | 1.5  | 0.0645 | 2.0  | 0.0108 | 1.4 | 0.70 | 69.4 | 1.0 | 63.4  | 1.3  | NA     | NA     | 69.4 | 1.0 |
| Rocker-Spot 54  | 951  | 19849  | 3.5  | 20.6935 | 1.3  | 0.0722 | 1.9  | 0.0108 | 1.4 | 0.74 | 69.5 | 1.0 | 70.8  | 1.3  | 114.2  | 30.0   | 69.5 | 1.0 |
| Rocker-Spot 1   | 716  | 20323  | 2.5  | 19.6870 | 2.0  | 0.0759 | 2.7  | 0.0108 | 1.8 | 0.66 | 69.6 | 1.2 | 74.3  | 1.9  | 230.5  | 46.0   | 69.6 | 1.2 |
| Rocker-Spot 176 | 608  | 24775  | 1.9  | 20.7873 | 0.9  | 0.0725 | 1.6  | 0.0109 | 1.3 | 0.81 | 70.1 | 0.9 | 71.1  | 1.1  | 103.5  | 22.0   | 70.1 | 0.9 |
| Rocker-Spot 206 | 844  | 23795  | 3.5  | 21.2625 | 1.0  | 0.0710 | 1.5  | 0.0110 | 1.1 | 0.74 | 70.3 | 0.8 | 69.7  | 1.0  | 49.8   | 24.5   | 70.3 | 0.8 |
| Rocker-Spot 91  | 335  | 23240  | 3.2  | 20.9133 | 1.3  | 0.0725 | 1.7  | 0.0110 | 1.1 | 0.63 | 70.5 | 0.8 | 71.0  | 1.2  | 89.2   | 31.0   | 70.5 | 0.8 |
| Rocker-Spot 73  | 891  | 17646  | 3.5  | 21.2640 | 1.1  | 0.0714 | 1.9  | 0.0110 | 1.5 | 0.79 | 70.6 | 1.1 | 70.0  | 1.3  | 49.6   | 27.3   | 70.6 | 1.1 |
| Rocker-Spot 223 | 1264 | 563062 | 4.3  | 20.8142 | 1.1  | 0.0730 | 1.6  | 0.0110 | 1.3 | 0.77 | 70.7 | 0.9 | 71.5  | 1.1  | 100.4  | 25.0   | 70.7 | 0.9 |
| Rocker-Spot 307 | 328  | 5136   | 2.6  | 21.9572 | 2.6  | 0.0692 | 2.9  | 0.0110 | 1.3 | 0.46 | 70.7 | 0.9 | 68.0  | 1.9  | NA     | NA     | 70.7 | 0.9 |
| Rocker-Spot 238 | 791  | 19846  | 4.5  | 21.1715 | 1.1  | 0.0720 | 1.6  | 0.0111 | 1.2 | 0.75 | 70.9 | 0.9 | 70.6  | 1.1  | 60.0   | 25.7   | 70.9 | 0.9 |
| Rocker-Spot 14  | 463  | 366761 | 3.1  | 20.7891 | 1.2  | 0.0734 | 1.8  | 0.0111 | 1.3 | 0.73 | 71.0 | 0.9 | 71.9  | 1.2  | 103.3  | 29.1   | 71.0 | 0.9 |
| Rocker-Spot 207 | 836  | 19759  | 6.6  | 21.2324 | 1.4  | 0.0721 | 1.7  | 0.0111 | 1.0 | 0.58 | 71.2 | 0.7 | 70.7  | 1.1  | 53.1   | 32.5   | 71.2 | 0.7 |
| Rocker-Spot 217 | 233  | 5587   | 3.7  | 22.2186 | 1.8  | 0.0689 | 2.2  | 0.0111 | 1.2 | 0.56 | 71.2 | 0.9 | 67.6  | 1.4  | NA     | NA     | 71.2 | 0.9 |
| Rocker-Spot 212 | 396  | 14755  | 4.4  | 20.7978 | 1.5  | 0.0737 | 2.0  | 0.0111 | 1.4 | 0.67 | 71.3 | 1.0 | 72.2  | 1.4  | 102.3  | 35.8   | 71.3 | 1.0 |
| Rocker-Spot 42  | 362  | 15062  | 2.9  | 20.8622 | 1.6  | 0.0737 | 2.0  | 0.0112 | 1.2 | 0.60 | 71.5 | 0.9 | 72.2  | 1.4  | 94.9   | 38.2   | 71.5 | 0.9 |
| Rocker-Spot 9   | 149  | 4962   | 4.1  | 21.9501 | 4.0  | 0.0703 | 4.2  | 0.0112 | 1.2 | 0.29 | 71.8 | 0.9 | 69.0  | 2.8  | NA     | NA     | 71.8 | 0.9 |
| Rocker-Spot 114 | 157  | 31225  | 1.3  | 20.9198 | 2.1  | 0.0744 | 2.3  | 0.0113 | 1.0 | 0.43 | 72.4 | 0.7 | 72.9  | 1.6  | 88.4   | 49.0   | 72.4 | 0.7 |
| Rocker-Spot 100 | 202  | 6356   | 4.4  | 22.1300 | 1.5  | 0.0706 | 1.8  | 0.0113 | 1.0 | 0.54 | 72.6 | 0.7 | 69.2  | 1.2  | NA     | NA     | 72.6 | 0.7 |
| Rocker-Spot 286 | 315  | 5527   | 3.0  | 21.9981 | 1.6  | 0.0713 | 2.2  | 0.0114 | 1.4 | 0.66 | 73.0 | 1.0 | 70.0  | 1.5  | NA     | NA     | 73.0 | 1.0 |
| Rocker-Spot 83  | 96   | 2251   | 3.9  | 22.8208 | 3.6  | 0.0688 | 3.9  | 0.0114 | 1.5 | 0.39 | 73.0 | 1.1 | 67.6  | 2.5  | NA     | NA     | 73.0 | 1.1 |
| Rocker-Spot 37  | 216  | 51202  | 2.5  | 16.8332 | 1.6  | 0.0933 | 2.3  | 0.0114 | 1.7 | 0.74 | 73.1 | 1.3 | 90.6  | 2.0  | 581.1  | 33.9   | 73.1 | 1.3 |
| Rocker-Spot 301 | 248  | 11178  | 2.0  | 21.1960 | 1.8  | 0.0744 | 2.3  | 0.0114 | 1.4 | 0.62 | 73.3 | 1.0 | 72.9  | 1.6  | 57.2   | 42.7   | 73.3 | 1.0 |
| Rocker-Spot 113 | 140  | 1289   | 2.0  | 6.1014  | 9.3  | 0.2590 | 9.5  | 0.0115 | 2.2 | 0.23 | 73.5 | 1.6 | 233.8 | 19.9 | 2495.5 | 156.8  | 73.5 | 1.6 |
| Rocker-Spot 38  | 143  | 20179  | 4.1  | 21.2247 | 2.3  | 0.0747 | 2.7  | 0.0115 | 1.4 | 0.51 | 73.8 | 1.0 | 73.2  | 1.9  | 54.0   | 54.7   | 73.8 | 1.0 |
| Rocker-Spot 138 | 298  | 8571   | 4.0  | 21.8089 | 1.6  | 0.0734 | 2.1  | 0.0116 | 1.3 | 0.65 | 74.4 | 1.0 | 71.9  | 1.4  | NA     | NA     | 74.4 | 1.0 |
| Rocker-Spot 68  | 848  | 12667  | 3.8  | 21.0671 | 1.1  | 0.0760 | 1.6  | 0.0116 | 1.1 | 0.71 | 74.4 | 0.8 | 74.3  | 1.2  | 71.8   | 27.1   | 74.4 | 0.8 |
| Rocker-Spot 174 | 507  | 10963  | 1.9  | 20.7316 | 1.2  | 0.0778 | 1.8  | 0.0117 | 1.3 | 0.75 | 75.0 | 1.0 | 76.1  | 1.3  | 109.8  | 28.2   | 75.0 | 1.0 |
| Rocker-Spot 192 | 160  | 6160   | 1.3  | 22.7483 | 2.6  | 0.0712 | 2.8  | 0.0118 | 1.0 | 0.35 | 75.3 | 0.7 | 69.8  | 1.9  | NA     | NA     | 75.3 | 0.7 |
| Rocker-Spot 243 | 1077 | 30054  | 8.4  | 21.2290 | 1.0  | 0.0774 | 1.5  | 0.0119 | 1.2 | 0.78 | 76.4 | 0.9 | 75.7  | 1.1  | 53.6   | 23.2   | 76.4 | 0.9 |
| Rocker-Spot 7   | 572  | 22810  | 1.9  | 19.0752 | 1.9  | 0.0865 | 2.2  | 0.0120 | 1.1 | 0.51 | 76.7 | 0.8 | 84.3  | 1.8  | 303.0  | 42.8   | 76.7 | 0.8 |
| Rocker-Spot 274 | 35   | 1961   | 2.0  | 22.9164 | 7.6  | 0.0730 | 7.7  | 0.0121 | 1.4 | 0.19 | 77.8 | 1.1 | 71.6  | 5.3  | NA     | NA     | 77.8 | 1.1 |
| Rocker-Spot 292 | 1855 | 329781 | 4.8  | 20.8389 | 1.0  | 0.0805 | 1.9  | 0.0122 | 1.6 | 0.84 | 78.0 | 1.2 | 78.6  | 1.4  | 97.6   | 24.3   | 78.0 | 1.2 |
| Rocker-Spot 234 | 77   | 20406  | 0.7  | 19.6789 | 2.9  | 0.0854 | 3.1  | 0.0122 | 1.2 | 0.40 | 78.1 | 1.0 | 83.2  | 2.5  | 231.5  | 66.2   | 78.1 | 1.0 |
| Rocker-Spot 106 | 253  | 8480   | 2.5  | 21.6736 | 1.6  | 0.0805 | 2.2  | 0.0127 | 1.5 | 0.69 | 81.1 | 1.2 | 78.6  | 1.7  | 3.8    | 38.9</ |      |     |

|                  |      |        |     |         |       |         |       |        |      |      |        |      |        |      |        |       |        |      |
|------------------|------|--------|-----|---------|-------|---------|-------|--------|------|------|--------|------|--------|------|--------|-------|--------|------|
| Rocker-Spot 123  | 289  | 71314  | 2.0 | 21.1200 | 1.6   | 0.0883  | 2.2   | 0.0135 | 1.6  | 0.71 | 86.6   | 1.4  | 85.9   | 1.8  | 65.8   | 37.4  | 86.6   | 1.4  |
| Rocker-Spot 102  | 60   | 2253   | 1.9 | 24.1625 | 3.5   | 0.0773  | 3.6   | 0.0135 | 1.0  | 0.28 | 86.8   | 0.9  | 75.6   | 2.7  | NA     | NA    | 86.8   | 0.9  |
| Rocker-Spot 25   | 86   | 3263   | 3.5 | 17.4954 | 3.1   | 0.1069  | 3.3   | 0.0136 | 1.1  | 0.32 | 86.9   | 0.9  | 103.1  | 3.3  | 496.7  | 69.3  | 86.9   | 0.9  |
| Rocker-Spot 41   | 19   | 2125   | 5.3 | 23.5371 | 5.1   | 0.0804  | 5.5   | 0.0137 | 2.2  | 0.40 | 87.9   | 1.9  | 78.5   | 4.2  | NA     | NA    | 87.9   | 1.9  |
| Rocker-Spot 185  | 97   | 19626  | 3.5 | 20.1219 | 1.9   | 0.0944  | 2.1   | 0.0138 | 0.8  | 0.40 | 88.2   | 0.7  | 91.6   | 1.8  | 179.8  | 44.2  | 88.2   | 0.7  |
| Rocker-Spot 95   | 18   | 20205  | 4.0 | 24.3941 | 3.9   | 0.0780  | 4.4   | 0.0138 | 2.0  | 0.45 | 88.4   | 1.7  | 76.3   | 3.2  | NA     | NA    | 88.4   | 1.7  |
| Rocker-Spot 148  | 61   | 4209   | 2.8 | 21.4922 | 3.4   | 0.0893  | 3.5   | 0.0139 | 1.1  | 0.32 | 89.2   | 1.0  | 86.9   | 2.9  | 24.0   | 80.4  | 89.2   | 1.0  |
| Rocker-Spot 24   | 71   | 6227   | 2.4 | 21.3842 | 2.9   | 0.0898  | 3.2   | 0.0139 | 1.4  | 0.43 | 89.2   | 1.2  | 87.3   | 2.7  | 36.1   | 68.5  | 89.2   | 1.2  |
| Rocker-Spot 86   | 30   | 1280   | 2.0 | 29.6674 | 4.9   | 0.0649  | 5.2   | 0.0140 | 1.4  | 0.28 | 89.5   | 1.3  | 63.9   | 3.2  | NA     | NA    | 89.5   | 1.3  |
| Rocker-Spot 3    | 46   | 6275   | 2.4 | 22.6477 | 3.8   | 0.0853  | 4.1   | 0.0140 | 1.4  | 0.34 | 89.8   | 1.2  | 83.2   | 3.2  | NA     | NA    | 89.8   | 1.2  |
| Rocker-Spot 297  | 138  | 40704  | 2.7 | 20.6666 | 2.3   | 0.0941  | 2.6   | 0.0141 | 1.3  | 0.49 | 90.3   | 1.1  | 91.3   | 2.3  | 117.2  | 53.1  | 90.3   | 1.1  |
| Rocker-Spot 253  | 63   | 5725   | 3.0 | 22.3927 | 3.2   | 0.0872  | 3.6   | 0.0142 | 1.8  | 0.48 | 90.7   | 1.6  | 84.9   | 2.9  | NA     | NA    | 90.7   | 1.6  |
| Rocker-Spot 0    | 75   | 3161   | 3.3 | 22.9852 | 3.0   | 0.0851  | 3.4   | 0.0142 | 1.6  | 0.47 | 90.9   | 1.5  | 82.9   | 2.7  | NA     | NA    | 90.9   | 1.5  |
| Rocker-Spot 127  | 119  | 3749   | 1.7 | 21.9897 | 2.6   | 0.0892  | 2.8   | 0.0142 | 1.1  | 0.38 | 91.1   | 1.0  | 86.8   | 2.4  | NA     | NA    | 91.1   | 1.0  |
| Rocker-Spot 273  | 150  | 8676   | 1.3 | 21.6606 | 2.2   | 0.0910  | 2.6   | 0.0143 | 1.5  | 0.56 | 91.5   | 1.3  | 88.4   | 2.2  | 5.3    | 52.6  | 91.5   | 1.3  |
| Rocker-Spot 249  | 60   | 2709   | 1.9 | 22.9109 | 2.9   | 0.0866  | 3.3   | 0.0144 | 1.6  | 0.49 | 92.1   | 1.5  | 84.3   | 2.7  | NA     | NA    | 92.1   | 1.5  |
| Rocker-Spot 203  | 26   | 64845  | 2.2 | 20.0573 | 3.6   | 0.0991  | 3.9   | 0.0144 | 1.5  | 0.39 | 92.3   | 1.4  | 96.0   | 3.6  | 187.3  | 84.1  | 92.3   | 1.4  |
| Rocker-Spot 129  | 27   | 2865   | 3.9 | 21.6247 | 5.1   | 0.0928  | 5.4   | 0.0146 | 1.8  | 0.33 | 93.2   | 1.7  | 90.1   | 4.6  | 9.3    | 121.9 | 93.2   | 1.7  |
| Rocker-Spot 143  | 49   | 2171   | 3.5 | 21.7785 | 6.2   | 0.0925  | 6.4   | 0.0146 | 1.5  | 0.23 | 93.5   | 1.4  | 89.8   | 5.5  | NA     | NA    | 93.5   | 1.4  |
| Rocker-Spot 264  | 81   | 25052  | 2.6 | 20.6377 | 3.3   | 0.0978  | 3.6   | 0.0146 | 1.3  | 0.37 | 93.7   | 1.2  | 94.8   | 3.2  | 120.5  | 77.7  | 93.7   | 1.2  |
| Rocker-Spot 105  | 55   | 31330  | 2.1 | 19.5382 | 2.2   | 0.1035  | 2.7   | 0.0147 | 1.5  | 0.54 | 93.9   | 1.4  | 100.0  | 2.5  | 248.0  | 51.6  | 93.9   | 1.4  |
| Rocker-Spot 261  | 33   | 2490   | 2.3 | 21.5652 | 3.9   | 0.0938  | 4.1   | 0.0147 | 1.3  | 0.33 | 93.9   | 1.3  | 91.0   | 3.6  | 15.9   | 92.8  | 93.9   | 1.3  |
| Rocker-Spot 31   | 54   | 3848   | 2.4 | 21.6551 | 3.3   | 0.0946  | 3.6   | 0.0149 | 1.4  | 0.38 | 95.1   | 1.3  | 91.8   | 3.1  | 5.9    | 79.9  | 95.1   | 1.3  |
| Rocker-Spot 29   | 113  | 10467  | 4.4 | 20.1622 | 2.7   | 0.1019  | 3.0   | 0.0149 | 1.3  | 0.43 | 95.4   | 1.2  | 98.6   | 2.8  | 175.1  | 62.3  | 95.4   | 1.2  |
| Rocker-Spot 120  | 59   | 3499   | 2.1 | 21.0781 | 3.7   | 0.0985  | 3.9   | 0.0151 | 1.2  | 0.32 | 96.4   | 1.2  | 95.4   | 3.6  | 70.5   | 88.4  | 96.4   | 1.2  |
| Rocker-Spot 287  | 51   | 5144   | 2.2 | 14.1168 | 6.2   | 0.1478  | 6.4   | 0.0151 | 1.4  | 0.22 | 96.9   | 1.3  | 140.0  | 8.3  | 951.8  | 127.5 | 96.9   | 1.3  |
| Rocker-Spot 108  | 32   | 4417   | 2.5 | 21.2616 | 4.5   | 0.1013  | 4.8   | 0.0156 | 1.7  | 0.34 | 100.0  | 1.6  | 98.0   | 4.5  | 49.9   | 108.0 | 100.0  | 1.6  |
| Rocker-Spot 259  | 356  | 18970  | 1.3 | 20.7962 | 1.4   | 0.1045  | 2.0   | 0.0158 | 1.4  | 0.71 | 100.9  | 1.4  | 100.9  | 1.9  | 102.5  | 32.6  | 100.9  | 1.4  |
| Rocker-Spot 153  | 47   | 4112   | 2.7 | 22.0107 | 3.6   | 0.1006  | 3.8   | 0.0161 | 1.1  | 0.30 | 102.7  | 1.2  | 97.3   | 3.5  | NA     | NA    | 102.7  | 1.2  |
| Rocker-Spot 154  | 1694 | 115396 | 2.9 | 20.3985 | 0.8   | 0.1090  | 1.4   | 0.0161 | 1.1  | 0.80 | 103.2  | 1.1  | 105.0  | 1.4  | 147.9  | 19.1  | 103.2  | 1.1  |
| Rocker-Spot 16   | 206  | 11218  | 2.1 | 21.0016 | 1.9   | 0.1068  | 2.4   | 0.0163 | 1.4  | 0.59 | 104.1  | 1.5  | 103.0  | 2.4  | 79.2   | 46.0  | 104.1  | 1.5  |
| Rocker-Spot 72   | 410  | 50512  | 1.6 | 20.5925 | 1.2   | 0.1092  | 1.8   | 0.0163 | 1.4  | 0.76 | 104.3  | 1.4  | 105.2  | 1.8  | 125.7  | 28.1  | 104.3  | 1.4  |
| Rocker-Spot 57   | 456  | 17423  | 2.5 | 21.1181 | 1.0   | 0.1069  | 1.5   | 0.0164 | 1.1  | 0.73 | 104.8  | 1.1  | 103.2  | 1.5  | 66.0   | 24.6  | 104.8  | 1.1  |
| Rocker-Spot 155  | 517  | 60578  | 2.0 | 20.5422 | 1.1   | 0.1100  | 2.0   | 0.0164 | 1.6  | 0.83 | 104.9  | 1.7  | 106.0  | 2.0  | 131.4  | 25.6  | 104.9  | 1.7  |
| Rocker-Spot 248  | 182  | 30215  | 1.9 | 20.2947 | 1.7   | 0.1114  | 2.1   | 0.0164 | 1.2  | 0.59 | 104.9  | 1.3  | 107.2  | 2.1  | 159.9  | 39.6  | 104.9  | 1.3  |
| Rocker-Spot 247  | 530  | 99345  | 2.6 | 19.4195 | 0.9   | 0.1175  | 1.6   | 0.0166 | 1.3  | 0.82 | 105.9  | 1.4  | 112.8  | 1.7  | 262.0  | 21.4  | 105.9  | 1.4  |
| Rocker-Spot 74   | 1479 | 151787 | 1.9 | 20.6786 | 0.9   | 0.1117  | 1.6   | 0.0168 | 1.3  | 0.82 | 107.2  | 1.4  | 107.6  | 1.7  | 115.9  | 22.1  | 107.2  | 1.4  |
| Rocker-Spot 276  | 328  | 158616 | 1.1 | 20.9117 | 1.1   | 0.1133  | 1.8   | 0.0172 | 1.4  | 0.80 | 109.9  | 1.5  | 109.0  | 1.8  | 89.4   | 25.7  | 109.9  | 1.5  |
| Rocker-Spot 179  | 632  | 106184 | 2.6 | 20.1549 | 0.9   | 0.1242  | 1.7   | 0.0182 | 1.4  | 0.86 | 116.0  | 1.6  | 118.9  | 1.9  | 176.0  | 20.0  | 116.0  | 1.6  |
| Rocker-Spot 8    | 223  | 10498  | 3.0 | 20.8601 | 1.7   | 0.1044  | 2.2   | 0.0203 | 1.3  | 0.62 | 129.8  | 1.7  | 128.0  | 2.6  | 95.2   | 40.0  | 129.8  | 1.7  |
| Rocker-Spot 268  | 378  | 94411  | 2.1 | 19.4083 | 0.9   | 0.2047  | 1.5   | 0.0288 | 1.2  | 0.81 | 183.2  | 2.2  | 189.1  | 2.5  | 263.3  | 19.7  | 183.2  | 2.2  |
| Rocker-Spot 49   | 72   | 6046   | 1.4 | 21.2324 | 3.2   | 0.1891  | 3.4   | 0.0291 | 1.1  | 0.34 | 185.1  | 2.1  | 175.9  | 5.4  | 53.1   | 75.7  | 185.1  | 2.1  |
| Rocker-Spot 166  | 332  | 90664  | 4.7 | 19.5164 | 1.4   | 0.2111  | 3.2   | 0.0299 | 2.9  | 0.91 | 189.9  | 5.4  | 194.5  | 5.7  | 250.6  | 31.4  | 189.9  | 5.4  |
| Rocker-Spot 50   | 355  | 32946  | 2.6 | 19.9956 | 1.0   | 0.2148  | 1.8   | 0.0312 | 1.4  | 0.81 | 197.9  | 2.8  | 197.6  | 3.2  | 194.5  | 24.0  | 197.9  | 2.8  |
| Rocker-Spot 47   | 709  | 251709 | 1.7 | 18.8184 | 0.7   | 0.3914  | 1.5   | 0.0534 | 1.3  | 0.86 | 335.6  | 4.1  | 335.4  | 4.2  | 333.8  | 16.9  | 335.6  | 4.1  |
| Rocker-Spot 17   | 143  | 128626 | 2.4 | 11.3228 | 0.7   | 2.8793  | 1.2   | 0.2366 | 1.0  | 0.84 | 1368.8 | 12.6 | 1376.5 | 9.2  | 1388.5 | 12.6  | 1388.5 | 12.6 |
| Rocker-Spot 119  | 78   | 50749  | 6.0 | 8.6746  | 0.7   | 5.2291  | 1.2   | 0.3291 | 1.0  | 0.82 | 1834.1 | 16.1 | 1857.4 | 10.4 | 1883.5 | 12.5  | 1883.5 | 12.5 |
| Rocker-Spot 308  | 237  | 107309 | 1.4 | 8.1802  | 0.9   | 5.8608  | 1.8   | 0.3479 | 1.6  | 0.87 | 1924.4 | 26.7 | 1955.4 | 16.0 | 1988.5 | 16.1  | 1988.5 | 16.1 |
| Rocker-Spot 40   | 158  | 83941  | 1.9 | 7.8777  | 0.8   | 6.5429  | 1.4   | 0.3740 | 1.1  | 0.83 | 2048.1 | 20.2 | 2051.7 | 12.1 | 2055.3 | 13.4  | 2055.3 | 13.4 |
| Rocker-Spot 231  | 187  | 627214 | 1.3 | 6.0036  | 0.7   | 10.6602 | 1.3   | 0.4644 | 1.1  | 0.84 | 2458.8 | 23.2 | 2494.0 | 12.5 | 2522.7 | 12.3  | 2522.7 | 12.3 |
| Rocker-Spot 220  | 113  | 204905 | 2.6 | 5.9976  | 0.6   | 10.1935 | 1.2   | 0.4436 | 1.0  | 0.86 | 2366.7 | 19.8 | 2452.5 | 10.8 | 2524.4 | 10.1  | 2524.4 | 10.1 |
| Rocker-Spot 82   | 67   | 161452 | 0.9 | 5.1582  | 1.0   | 14.3058 | 1.7   | 0.5354 | 1.4  | 0.80 | 2764.3 | 30.4 | 2770.2 | 15.9 | 2774.5 | 16.4  | 2774.5 | 16.4 |
| Rocker-Spot 246  | 37   | 104092 | 2.4 | 4.6362  | 0.8   | 17.0318 | 1.3   | 0.5729 | 1.0  | 0.80 | 2919.9 | 23.7 | 2936.6 | 12.2 | 2948.1 | 12.4  | 2948.1 | 12.4 |
| Sanford River    |      |        |     |         |       |         |       |        |      |      |        |      |        |      |        |       |        |      |
| Sanford-Spot 202 | 199  | 20     | 1.5 | 2.0000  | 43.8  | 0.0012  | 46.4  | 0.0000 | 15.6 | 0.34 | 0.1    | 0.0  | 1.2    | 0.6  | NA     | NA    | 0.1    | 0.0  |
| Sanford-Spot 76  | 108  | 20     | 1.4 | 2.0000  | 91.3  | 0.0012  | 94.4  | 0.0000 | 24.1 | 0.26 | 0.1    | 0.0  | 1.2    | 1.2  | NA     | NA    | 0.1    | 0.0  |
| Sanford-Spot 213 | 195  | 20     | 1.4 | 2.0000  | 1.8   | 0.0013  | 13.6  | 0.0000 | 13.4 | 0.99 | 0.1    | 0.0  | 1.3    | 0.2  | NA     | NA    | 0.1    | 0.0  |
| Sanford-Spot 2   | 193  | 20     | 1.7 | 2.0000  | 50.0  | 0.0013  | 52.6  | 0.0000 | 16.2 | 0.31 | 0.1    | 0.0  | 1.3    | 0.7  | NA     | NA    | 0.1    | 0.0  |
| Sanford-Spot 118 | 201  | 20     | 2.5 | 2.0000  | 65.3  | 0.0013  | 67.4  | 0.0000 | 16.7 | 0.25 | 0.1    | 0.0  | 1.3    | 0.9  | NA     | NA    | 0.1    | 0.0  |
| Sanford-Spot 251 | 106  | 20     | 2.2 | 2.0000  | 42.1  | 0.0015  | 45.3  | 0.0000 | 16.9 | 0.37 | 0.1    | 0.0  | 1.5    | 0.7  | NA     | NA    | 0.1    | 0.0  |
| Sanford-Spot 298 | 95   | 20     | 2.4 | 2.0000  | 2.5   | 0.0015  | 24.0  | 0.0000 | 23.9 | 0.99 | 0.1    | 0.0  | 1.6    | 0.4  | NA     | NA    | 0.1    | 0.0  |
| Sanford-Spot 156 | 88   | 20     | 3.2 | 2.0000  | 50.0  | 0.0016  | 53.8  | 0.0000 | 19.8 | 0.37 | 0.1    | 0.0  | 1.6    | 0.9  | NA     | NA    | 0.1    | 0.0  |
| Sanford-Spot 290 | 99   | 20     | 2.3 | 2.0000  | 64.0  | 0.0016  | 66.1  | 0.0000 | 16.5 | 0.25 | 0.2    | 0.0  | 1.7    | 1.1  | NA     | NA    | 0.2    | 0.0  |
| Sanford-Spot 257 | 58   | 20     | 2.4 | 2.0000  | 44.2  | 0.0017  | 48.7  | 0.0000 | 20.4 | 0.42 | 0.2    | 0.0  | 1.7    | 0.8  | NA     | NA    | 0.2    | 0.0  |
| Sanford-Spot 252 | 104  | 20     | 1.1 | 2.0000  | 4.3   | 0.0018  | 15.9  | 0.0000 | 15.3 | 0.96 | 0.2    | 0.0  | 1.8    | 0.3  | NA     | NA    | 0.2    | 0.0  |
| Sanford-Spot 95  | 111  | 20     | 3.3 | 2.0000  | 50.0  | 0.0018  | 52.8  | 0.0000 | 17.0 | 0.32 | 0.2    | 0.0  | 1.8    | 1.0  | NA     | NA    | 0.2    | 0.0  |
| Sanford-Spot 315 | 108  | 20     | 1.9 | 2.0000  | 50.0  | 0.0019  | 51.3  | 0.0000 | 11.3 | 0.22 | 0.2    | 0.0  | 1.9    | 1.0  | NA     | NA    | 0.2    | 0.0  |
| Sanford-Spot 8   | 102  | 20     | 2.1 | 2.0000  | 111.4 | 0.0020  | 112.2 | 0.0000 | 13.7 | 0.12 | 0.2    | 0.0  | 2.0    | 2.3  | NA     | NA    | 0.2    | 0.0  |
| Sanford-Spot 204 | 50   | 20     | 2.3 | 2.0000  | 50.0  | 0.0021  | 54.6  | 0.0000 | 21.9 | 0.40 | 0.2    | 0.0  | 2.2    | 1.2  | NA     | NA    | 0.2    | 0.0  |
| Sanford-Spot 120 | 119  | 20     | 1.8 | 2.0000  | 38.5  | 0.0026  | 40.8  | 0.0000 | 13.3 | 0.33 | 0.2    | 0.0  | 2.6    | 1.1  | NA     | NA    | 0.2    | 0.0  |
| Sanford-Spot 111 | 760  | 103    | 1.5 |         |       |         |       |        |      |      |        |      |        |      |        |       |        |      |

|                  |      |        |      |         |      |        |      |        |     |      |       |     |       |      |       |       |       |     |
|------------------|------|--------|------|---------|------|--------|------|--------|-----|------|-------|-----|-------|------|-------|-------|-------|-----|
| Sanford-Spot 13  | 367  | 2139   | 1.6  | 23.0794 | 4.6  | 0.0110 | 5.7  | 0.0018 | 3.4 | 0.60 | 11.9  | 0.4 | 11.1  | 0.6  | NA    | NA    | 11.9  | 0.4 |
| Sanford-Spot 170 | 181  | 688    | 2.6  | 48.4336 | 5.4  | 0.0053 | 6.1  | 0.0019 | 2.8 | 0.46 | 12.1  | 0.3 | 5.4   | 0.3  | NA    | NA    | 12.1  | 0.3 |
| Sanford-Spot 301 | 156  | 1074   | 1.5  | 20.3382 | 8.9  | 0.0128 | 9.5  | 0.0019 | 3.4 | 0.36 | 12.1  | 0.4 | 12.9  | 1.2  | 155.9 | 208.4 | 12.1  | 0.4 |
| Sanford-Spot 200 | 1055 | 15337  | 12.6 | 20.8321 | 1.3  | 0.1233 | 3.9  | 0.0186 | 3.6 | 0.94 | 119.0 | 4.3 | 118.0 | 4.3  | 99.4  | 31.0  | 119.0 | 4.3 |
| Sanford-Spot 314 | 530  | 6760   | 2.2  | 19.9061 | 2.4  | 0.1314 | 3.5  | 0.0190 | 2.5 | 0.71 | 121.2 | 3.0 | 125.3 | 4.1  | 205.9 | 56.4  | 121.2 | 3.0 |
| Sanford-Spot 277 | 568  | 4225   | 1.8  | 21.3056 | 1.8  | 0.1261 | 3.4  | 0.0195 | 2.9 | 0.85 | 124.4 | 3.6 | 120.6 | 3.9  | 45.9  | 43.9  | 124.4 | 3.6 |
| Sanford-Spot 258 | 148  | 771    | 2.8  | 30.3184 | 3.8  | 0.0886 | 4.8  | 0.0195 | 2.9 | 0.61 | 124.5 | 3.6 | 86.2  | 4.0  | NA    | NA    | 124.5 | 3.6 |
| Sanford-Spot 55  | 141  | 923    | 2.2  | 30.2772 | 7.4  | 0.0893 | 7.9  | 0.0196 | 2.7 | 0.35 | 125.2 | 3.4 | 86.8  | 6.5  | NA    | NA    | 125.2 | 3.4 |
| Sanford-Spot 266 | 1021 | 7378   | 1.9  | 20.3535 | 1.2  | 0.1328 | 3.2  | 0.0196 | 3.0 | 0.93 | 125.2 | 3.7 | 126.6 | 3.8  | 154.1 | 27.6  | 125.2 | 3.7 |
| Sanford-Spot 263 | 109  | 1345   | 2.5  | 26.4089 | 3.8  | 0.1030 | 4.8  | 0.0197 | 2.9 | 0.60 | 126.0 | 3.6 | 99.5  | 4.5  | NA    | NA    | 126.0 | 3.6 |
| Sanford-Spot 78  | 115  | 196395 | 3.1  | 19.7129 | 2.2  | 0.1380 | 4.0  | 0.0197 | 3.3 | 0.83 | 126.0 | 4.2 | 131.3 | 5.0  | 228.5 | 51.7  | 126.0 | 4.2 |
| Sanford-Spot 275 | 209  | 1534   | 2.2  | 24.3806 | 1.8  | 0.1118 | 3.4  | 0.0198 | 2.9 | 0.86 | 126.3 | 3.6 | 107.6 | 3.5  | NA    | NA    | 126.3 | 3.6 |
| Sanford-Spot 309 | 610  | 7579   | 2.8  | 20.9903 | 2.3  | 0.1300 | 3.7  | 0.0198 | 2.9 | 0.79 | 126.4 | 3.7 | 124.1 | 4.3  | 81.5  | 54.1  | 126.4 | 3.7 |
| Sanford-Spot 269 | 209  | 31637  | 2.8  | 19.6380 | 1.7  | 0.1392 | 3.2  | 0.0198 | 2.6 | 0.84 | 126.6 | 3.3 | 132.3 | 3.9  | 237.3 | 39.8  | 126.6 | 3.3 |
| Sanford-Spot 129 | 189  | 1157   | 1.9  | 25.5384 | 2.0  | 0.1071 | 3.1  | 0.0198 | 2.4 | 0.77 | 126.7 | 3.1 | 103.3 | 3.1  | NA    | NA    | 126.7 | 3.1 |
| Sanford-Spot 250 | 141  | 1246   | 2.0  | 26.8446 | 2.9  | 0.1022 | 3.9  | 0.0199 | 2.6 | 0.66 | 127.1 | 3.2 | 98.8  | 3.7  | NA    | NA    | 127.1 | 3.2 |
| Sanford-Spot 217 | 206  | 4466   | 1.6  | 21.2202 | 2.5  | 0.1294 | 3.7  | 0.0199 | 2.7 | 0.74 | 127.2 | 3.5 | 123.5 | 4.3  | 55.6  | 59.1  | 127.2 | 3.5 |
| Sanford-Spot 92  | 183  | 1911   | 1.9  | 23.0042 | 2.2  | 0.1194 | 3.7  | 0.0199 | 3.0 | 0.81 | 127.2 | 3.8 | 114.5 | 4.0  | NA    | NA    | 127.2 | 3.8 |
| Sanford-Spot 262 | 660  | 8070   | 2.2  | 20.9557 | 1.6  | 0.1312 | 3.3  | 0.0199 | 3.0 | 0.89 | 127.3 | 3.7 | 125.2 | 3.9  | 85.4  | 36.9  | 127.3 | 3.7 |
| Sanford-Spot 253 | 558  | 9039   | 2.9  | 20.5535 | 1.9  | 0.1339 | 3.5  | 0.0200 | 2.9 | 0.83 | 127.4 | 3.6 | 127.6 | 4.1  | 131.1 | 45.1  | 127.4 | 3.6 |
| Sanford-Spot 133 | 494  | 7272   | 2.2  | 20.7947 | 2.1  | 0.1323 | 3.4  | 0.0200 | 2.7 | 0.79 | 127.5 | 3.4 | 126.2 | 4.0  | 103.7 | 48.6  | 127.5 | 3.4 |
| Sanford-Spot 7   | 125  | 5620   | 2.6  | 19.8653 | 2.1  | 0.1386 | 4.1  | 0.0200 | 3.5 | 0.85 | 127.5 | 4.4 | 131.8 | 5.0  | 210.7 | 49.5  | 127.5 | 4.4 |
| Sanford-Spot 27  | 167  | 1656   | 2.8  | 23.7591 | 8.7  | 0.1159 | 9.2  | 0.0200 | 3.0 | 0.32 | 127.6 | 3.7 | 111.4 | 9.7  | NA    | NA    | 127.6 | 3.7 |
| Sanford-Spot 240 | 278  | 3408   | 2.5  | 21.3205 | 2.5  | 0.1293 | 4.1  | 0.0200 | 3.2 | 0.79 | 127.6 | 4.1 | 123.4 | 4.8  | 44.3  | 60.0  | 127.6 | 4.1 |
| Sanford-Spot 242 | 150  | 23220  | 2.1  | 20.7166 | 2.2  | 0.1331 | 3.8  | 0.0200 | 3.1 | 0.82 | 127.7 | 3.9 | 126.8 | 4.5  | 112.5 | 51.1  | 127.7 | 3.9 |
| Sanford-Spot 69  | 166  | 22734  | 2.7  | 19.2770 | 2.1  | 0.1430 | 3.6  | 0.0200 | 2.9 | 0.81 | 127.7 | 3.7 | 135.8 | 4.6  | 279.9 | 48.4  | 127.7 | 3.7 |
| Sanford-Spot 17  | 661  | 2627   | 2.9  | 22.2835 | 1.4  | 0.1238 | 3.5  | 0.0200 | 3.2 | 0.91 | 127.7 | 4.0 | 118.5 | 3.9  | NA    | NA    | 127.7 | 4.0 |
| Sanford-Spot 65  | 560  | 49967  | 2.2  | 19.9422 | 1.5  | 0.1384 | 2.6  | 0.0200 | 2.2 | 0.83 | 127.8 | 2.8 | 131.6 | 3.3  | 201.7 | 34.3  | 127.8 | 2.8 |
| Sanford-Spot 161 | 234  | 1646   | 1.7  | 23.2712 | 1.9  | 0.1186 | 3.1  | 0.0200 | 2.4 | 0.79 | 127.9 | 3.1 | 113.8 | 3.3  | NA    | NA    | 127.9 | 3.1 |
| Sanford-Spot 215 | 240  | 22545  | 2.7  | 18.4899 | 2.3  | 0.1495 | 3.8  | 0.0201 | 3.0 | 0.80 | 128.0 | 3.8 | 141.4 | 5.0  | 374.5 | 50.7  | 128.0 | 3.8 |
| Sanford-Spot 246 | 564  | 19788  | 1.4  | 20.5493 | 1.5  | 0.1345 | 3.5  | 0.0201 | 3.1 | 0.91 | 128.0 | 4.0 | 128.1 | 4.2  | 131.6 | 34.3  | 128.0 | 4.0 |
| Sanford-Spot 181 | 149  | 2930   | 2.7  | 22.6571 | 3.0  | 0.1220 | 4.1  | 0.0201 | 2.8 | 0.68 | 128.1 | 3.5 | 116.9 | 4.5  | NA    | NA    | 128.1 | 3.5 |
| Sanford-Spot 107 | 642  | 14616  | 2.7  | 20.1130 | 1.4  | 0.1376 | 3.7  | 0.0201 | 3.4 | 0.92 | 128.2 | 4.3 | 130.9 | 4.5  | 181.9 | 32.8  | 128.2 | 4.3 |
| Sanford-Spot 146 | 265  | 5162   | 1.7  | 21.5003 | 1.6  | 0.1288 | 3.0  | 0.0201 | 2.6 | 0.85 | 128.2 | 3.3 | 123.0 | 3.5  | 24.2  | 38.1  | 128.2 | 3.3 |
| Sanford-Spot 199 | 266  | 21486  | 2.0  | 19.8267 | 2.2  | 0.1397 | 3.8  | 0.0201 | 3.1 | 0.81 | 128.2 | 3.9 | 132.8 | 4.7  | 215.2 | 51.8  | 128.2 | 3.9 |
| Sanford-Spot 292 | 632  | 5854   | 1.9  | 20.8182 | 1.6  | 0.1330 | 3.0  | 0.0201 | 2.5 | 0.84 | 128.3 | 3.2 | 126.8 | 3.6  | 101.0 | 38.4  | 128.3 | 3.2 |
| Sanford-Spot 98  | 160  | 8069   | 3.9  | 19.8871 | 1.5  | 0.1393 | 3.4  | 0.0201 | 3.1 | 0.90 | 128.3 | 3.9 | 132.4 | 4.2  | 208.1 | 33.8  | 128.3 | 3.9 |
| Sanford-Spot 282 | 165  | 11878  | 2.9  | 20.3532 | 2.8  | 0.1362 | 3.9  | 0.0201 | 2.7 | 0.69 | 128.4 | 3.5 | 129.6 | 4.8  | 154.1 | 66.2  | 128.4 | 3.5 |
| Sanford-Spot 68  | 572  | 25236  | 2.4  | 19.7465 | 1.6  | 0.1404 | 3.4  | 0.0201 | 3.0 | 0.89 | 128.4 | 3.9 | 133.4 | 4.3  | 224.6 | 36.6  | 128.4 | 3.9 |
| Sanford-Spot 176 | 225  | 3900   | 1.8  | 21.2208 | 4.5  | 0.1307 | 5.3  | 0.0201 | 2.8 | 0.52 | 128.5 | 3.5 | 124.7 | 6.2  | 55.5  | 108.4 | 128.5 | 3.5 |
| Sanford-Spot 58  | 357  | 9433   | 2.5  | 20.6254 | 2.2  | 0.1345 | 3.6  | 0.0201 | 2.9 | 0.79 | 128.5 | 3.6 | 128.1 | 4.3  | 122.9 | 52.0  | 128.5 | 3.6 |
| Sanford-Spot 36  | 242  | 4370   | 1.8  | 21.1544 | 2.1  | 0.1312 | 3.6  | 0.0201 | 2.9 | 0.80 | 128.5 | 3.6 | 125.1 | 4.2  | 63.0  | 51.0  | 128.5 | 3.6 |
| Sanford-Spot 30  | 718  | 18637  | 3.1  | 20.3107 | 1.4  | 0.1366 | 3.4  | 0.0201 | 3.1 | 0.92 | 128.5 | 4.0 | 130.0 | 4.2  | 159.1 | 32.2  | 128.5 | 4.0 |
| Sanford-Spot 310 | 399  | 49948  | 1.4  | 19.6549 | 1.9  | 0.1413 | 3.1  | 0.0201 | 2.5 | 0.80 | 128.6 | 3.2 | 134.2 | 3.9  | 235.3 | 43.0  | 128.6 | 3.2 |
| Sanford-Spot 244 | 512  | 6967   | 2.3  | 21.3307 | 1.5  | 0.1304 | 3.8  | 0.0202 | 3.4 | 0.92 | 128.8 | 4.4 | 124.5 | 4.4  | 43.2  | 35.8  | 128.8 | 4.4 |
| Sanford-Spot 307 | 218  | 11374  | 2.8  | 20.1761 | 1.8  | 0.1379 | 3.1  | 0.0202 | 2.5 | 0.82 | 128.9 | 3.2 | 131.2 | 3.8  | 174.6 | 41.0  | 128.9 | 3.2 |
| Sanford-Spot 211 | 514  | 21438  | 2.0  | 20.4728 | 1.4  | 0.1360 | 3.0  | 0.0202 | 2.6 | 0.89 | 129.0 | 3.4 | 129.5 | 3.6  | 140.4 | 32.3  | 129.0 | 3.4 |
| Sanford-Spot 96  | 406  | 10916  | 2.6  | 21.3387 | 1.8  | 0.1305 | 3.6  | 0.0202 | 3.1 | 0.86 | 129.0 | 4.0 | 124.6 | 4.3  | 42.2  | 43.5  | 129.0 | 4.0 |
| Sanford-Spot 113 | 289  | 10863  | 3.0  | 18.9948 | 1.9  | 0.1466 | 3.8  | 0.0202 | 3.3 | 0.87 | 129.0 | 4.2 | 138.9 | 5.0  | 313.6 | 43.1  | 129.0 | 4.2 |
| Sanford-Spot 306 | 196  | 5651   | 2.7  | 20.5658 | 2.1  | 0.1356 | 3.1  | 0.0202 | 2.3 | 0.73 | 129.2 | 2.9 | 129.2 | 3.8  | 129.8 | 50.5  | 129.2 | 2.9 |
| Sanford-Spot 221 | 167  | 3314   | 2.7  | 22.2895 | 2.0  | 0.1253 | 3.7  | 0.0203 | 3.2 | 0.85 | 129.4 | 4.1 | 119.9 | 4.2  | NA    | NA    | 129.4 | 4.1 |
| Sanford-Spot 4   | 179  | 11591  | 2.4  | 20.6918 | 1.5  | 0.1350 | 3.2  | 0.0203 | 2.8 | 0.88 | 129.4 | 3.6 | 128.6 | 3.9  | 115.4 | 35.8  | 129.4 | 3.6 |
| Sanford-Spot 304 | 701  | 10773  | 1.9  | 20.4183 | 1.3  | 0.1369 | 3.1  | 0.0203 | 2.8 | 0.90 | 129.4 | 3.6 | 130.3 | 3.8  | 146.7 | 31.6  | 129.4 | 3.6 |
| Sanford-Spot 80  | 172  | 3159   | 2.2  | 21.4204 | 2.9  | 0.1305 | 4.5  | 0.0203 | 3.4 | 0.76 | 129.5 | 4.4 | 124.6 | 5.3  | 33.1  | 69.9  | 129.5 | 4.4 |
| Sanford-Spot 144 | 315  | 6492   | 2.5  | 20.4302 | 2.5  | 0.1369 | 3.7  | 0.0203 | 2.8 | 0.74 | 129.5 | 3.6 | 130.3 | 4.6  | 145.3 | 59.0  | 129.5 | 3.6 |
| Sanford-Spot 138 | 604  | 11817  | 1.9  | 21.0064 | 2.1  | 0.1332 | 3.6  | 0.0203 | 2.9 | 0.82 | 129.5 | 3.8 | 126.9 | 4.3  | 79.6  | 49.3  | 129.5 | 3.8 |
| Sanford-Spot 193 | 174  | 28776  | 2.0  | 19.3205 | 2.2  | 0.1448 | 3.6  | 0.0203 | 2.9 | 0.80 | 129.6 | 3.7 | 137.3 | 4.7  | 274.7 | 49.7  | 129.6 | 3.7 |
| Sanford-Spot 168 | 189  | 6202   | 2.7  | 20.4783 | 2.8  | 0.1366 | 4.4  | 0.0203 | 3.4 | 0.77 | 129.6 | 4.3 | 130.0 | 5.4  | 139.8 | 66.3  | 129.6 | 4.3 |
| Sanford-Spot 280 | 199  | 1769   | 2.5  | 23.9608 | 10.2 | 0.1168 | 10.5 | 0.0203 | 2.6 | 0.25 | 129.6 | 3.3 | 112.1 | 11.2 | NA    | NA    | 129.6 | 3.3 |
| Sanford-Spot 194 | 276  | 6548   | 2.4  | 20.8630 | 1.4  | 0.1342 | 2.8  | 0.0203 | 2.4 | 0.86 | 129.6 | 3.1 | 127.9 | 3.3  | 95.9  | 34.1  | 129.6 | 3.1 |
| Sanford-Spot 110 | 256  | 5503   | 2.9  | 21.1422 | 2.2  | 0.1324 | 4.2  | 0.0203 | 3.7 | 0.86 | 129.7 | 4.7 | 126.3 | 5.0  | 64.3  | 51.4  | 129.7 | 4.7 |
| Sanford-Spot 145 | 466  | 5612   | 2.7  | 20.9482 | 1.8  | 0.1337 | 3.1  | 0.0203 | 2.6 | 0.83 | 129.7 | 3.3 | 127.4 | 3.7  | 86.3  | 41.6  | 129.7 | 3.3 |
| Sanford-Spot 24  | 592  | 14051  | 2.8  | 20.5590 | 1.9  | 0.1364 | 3.8  | 0.0203 | 3.3 | 0.87 | 129.8 | 4.2 | 129.8 | 4.6  | 130.5 | 43.9  | 129.8 | 4.2 |
| Sanford-Spot 139 | 165  | 1546   | 2.9  | 24.4290 | 11.9 | 0.1148 | 12.2 | 0.0204 | 2.8 | 0.23 | 129.9 | 3.6 | 110.4 | 12.8 | NA    | NA    | 129.9 | 3.6 |
| Sanford-Spot 75  | 261  | 2414   | 2.0  | 22.6754 | 2.4  | 0.1238 | 4.0  | 0.0204 | 3.3 | 0.81 | 130.0 | 4.2 | 118.5 | 4.5  | NA    | NA    | 130.0 | 4.2 |
| Sanford-Spot 256 | 583  | 58693  | 1.5  | 20.1598 | 1.7  | 0.1393 | 3.2  | 0.0204 | 2.8 | 0.86 | 130.0 | 3.6 | 132.4 | 4.0  | 176.4 | 38.5  | 130.0 | 3.6 |
| Sanford-Spot 122 | 668  | 34186  | 2.4  | 20.2442 | 1.6  | 0.1388 | 3.1  | 0.0204 | 2.6 | 0.85 | 130.2 | 3.4 | 132.0 | 3.8  | 166.7 | 37.6  | 130.2 | 3.4 |
| Sanford-Spot 210 | 144  | 5476   | 2.7  | 21.1586 | 1.9  | 0.1330 | 3.6  | 0.0204 | 3.0 | 0.85 | 130.3 | 3.9 | 126.8 | 4.3  | 62.5  | 45.3  | 130.3 | 3.9 |
| Sanford-Spot 162 | 320  | 2773   | 1.6  | 21.9745 |      |        |      |        |     |      |       |     |       |      |       |       |       |     |

|                      |      |        |     |         |       |         |       |         |      |      |       |     |       |      |        |        |       |     |
|----------------------|------|--------|-----|---------|-------|---------|-------|---------|------|------|-------|-----|-------|------|--------|--------|-------|-----|
| Sanford-Spot 305     | 280  | 5906   | 3.0 | 20.9977 | 1.6   | 0.1350  | 3.1   | 0.0206  | 2.7  | 0.87 | 131.3 | 3.5 | 128.6 | 3.8  | 80.6   | 37.1   | 131.3 | 3.5 |
| Sanford-Spot 226     | 190  | 12728  | 1.9 | 19.4172 | 1.8   | 0.1461  | 3.7   | 0.0206  | 3.2  | 0.87 | 131.4 | 4.2 | 138.5 | 4.8  | 263.3  | 42.0   | 131.4 | 4.2 |
| Sanford-Spot 180     | 487  | 5869   | 2.3 | 21.9499 | 1.8   | 0.1293  | 2.8   | 0.0206  | 2.1  | 0.75 | 131.4 | 2.8 | 123.5 | 3.3  | NA     | NA     | 131.4 | 2.8 |
| Sanford-Spot 207     | 251  | 6787   | 2.5 | 19.8766 | 2.2   | 0.1428  | 3.4   | 0.0206  | 2.6  | 0.75 | 131.4 | 3.3 | 135.5 | 4.3  | 209.3  | 52.0   | 131.4 | 3.3 |
| Sanford-Spot 84      | 349  | 53106  | 2.1 | 19.8313 | 1.5   | 0.1434  | 2.9   | 0.0206  | 2.5  | 0.85 | 131.6 | 3.3 | 136.0 | 3.7  | 214.7  | 35.7   | 131.6 | 3.3 |
| Sanford-Spot 101     | 174  | 18035  | 3.0 | 20.4611 | 2.0   | 0.1389  | 3.3   | 0.0206  | 2.6  | 0.80 | 131.6 | 3.4 | 132.1 | 4.1  | 141.8  | 46.3   | 131.6 | 3.4 |
| Sanford-Spot 167     | 370  | 5842   | 2.6 | 21.2483 | 1.6   | 0.1339  | 3.1   | 0.0206  | 2.6  | 0.86 | 131.7 | 3.4 | 127.6 | 3.7  | 52.4   | 38.3   | 131.7 | 3.4 |
| Sanford-Spot 239     | 325  | 11057  | 1.9 | 19.7273 | 2.1   | 0.1444  | 3.2   | 0.0207  | 2.4  | 0.75 | 131.9 | 3.2 | 136.9 | 4.1  | 226.8  | 48.9   | 131.9 | 3.2 |
| Sanford-Spot 209     | 171  | 11552  | 2.5 | 20.8013 | 2.0   | 0.1370  | 4.5   | 0.0207  | 4.0  | 0.89 | 131.9 | 5.2 | 130.4 | 5.5  | 102.9  | 48.4   | 131.9 | 5.2 |
| Sanford-Spot 188     | 205  | 5988   | 3.8 | 19.8934 | 1.8   | 0.1433  | 3.0   | 0.0207  | 2.4  | 0.81 | 132.0 | 3.1 | 136.0 | 3.8  | 207.4  | 40.9   | 132.0 | 3.1 |
| Sanford-Spot 259     | 513  | 103992 | 2.6 | 19.4334 | 1.8   | 0.1469  | 3.5   | 0.0207  | 3.0  | 0.85 | 132.1 | 3.9 | 139.1 | 4.6  | 261.4  | 41.7   | 132.1 | 3.9 |
| Sanford-Spot 62      | 205  | 4004   | 2.1 | 21.6822 | 2.7   | 0.1318  | 4.0   | 0.0207  | 2.9  | 0.73 | 132.3 | 3.9 | 125.7 | 4.8  | 3.9    | 65.9   | 132.3 | 3.9 |
| Sanford-Spot 274     | 237  | 6218   | 1.5 | 21.2082 | 1.8   | 0.1349  | 3.7   | 0.0208  | 3.3  | 0.88 | 132.5 | 4.3 | 128.5 | 4.5  | 56.9   | 42.9   | 132.5 | 4.3 |
| Sanford-Spot 153     | 325  | 4014   | 1.7 | 21.4935 | 1.8   | 0.1332  | 3.0   | 0.0208  | 2.3  | 0.79 | 132.5 | 3.1 | 127.0 | 3.5  | 25.0   | 43.7   | 132.5 | 3.1 |
| Sanford-Spot 245     | 569  | 14186  | 1.3 | 16.4810 | 3.8   | 0.1738  | 5.5   | 0.0208  | 4.0  | 0.73 | 132.6 | 5.2 | 162.7 | 8.3  | 627.7  | 81.4   | 132.6 | 5.2 |
| Sanford-Spot 260     | 150  | 8440   | 2.6 | 20.8724 | 2.5   | 0.1374  | 3.7   | 0.0208  | 2.7  | 0.73 | 132.7 | 3.6 | 130.7 | 4.6  | 94.8   | 60.2   | 132.7 | 3.6 |
| Sanford-Spot 220     | 469  | 3491   | 2.4 | 20.6859 | 2.1   | 0.1386  | 3.3   | 0.0208  | 2.6  | 0.77 | 132.7 | 3.4 | 131.8 | 4.1  | 116.0  | 50.1   | 132.7 | 3.4 |
| Sanford-Spot 231     | 184  | 1993   | 2.7 | 14.7439 | 6.7   | 0.1945  | 7.3   | 0.0208  | 2.9  | 0.39 | 132.8 | 3.7 | 180.5 | 12.0 | 863.2  | 139.0  | 132.8 | 3.7 |
| Sanford-Spot 183     | 128  | 48822  | 2.7 | 20.1797 | 2.2   | 0.1422  | 3.4   | 0.0208  | 2.5  | 0.75 | 132.9 | 3.3 | 135.0 | 4.2  | 174.1  | 51.6   | 132.9 | 3.3 |
| Sanford-Spot 191     | 248  | 10453  | 2.9 | 20.9848 | 2.1   | 0.1368  | 3.3   | 0.0208  | 2.5  | 0.77 | 132.9 | 3.3 | 130.2 | 4.0  | 82.1   | 49.6   | 132.9 | 3.3 |
| Sanford-Spot 182     | 561  | 11160  | 2.4 | 20.8335 | 1.5   | 0.1380  | 2.8   | 0.0209  | 2.3  | 0.85 | 133.1 | 3.1 | 131.3 | 3.4  | 99.3   | 34.6   | 133.1 | 3.1 |
| Sanford-Spot 149     | 372  | 7075   | 3.1 | 21.0014 | 1.8   | 0.1370  | 2.9   | 0.0209  | 2.3  | 0.78 | 133.2 | 3.0 | 130.3 | 3.6  | 80.2   | 43.4   | 133.2 | 3.0 |
| Sanford-Spot 142     | 362  | 13114  | 2.9 | 20.5656 | 1.7   | 0.1399  | 3.3   | 0.0209  | 2.9  | 0.87 | 133.2 | 3.8 | 133.0 | 4.2  | 129.8  | 39.3   | 133.2 | 3.8 |
| Sanford-Spot 172     | 167  | 14040  | 2.3 | 19.8070 | 2.1   | 0.1453  | 3.7   | 0.0209  | 3.1  | 0.83 | 133.3 | 4.1 | 137.8 | 4.8  | 217.5  | 48.6   | 133.3 | 4.1 |
| Sanford-Spot 265     | 192  | 8733   | 4.7 | 21.3471 | 1.8   | 0.1349  | 3.3   | 0.0209  | 2.8  | 0.84 | 133.3 | 3.7 | 128.5 | 4.0  | 41.3   | 42.9   | 133.3 | 3.7 |
| Sanford-Spot 15      | 584  | 38373  | 1.3 | 20.0106 | 1.3   | 0.1441  | 3.0   | 0.0209  | 2.8  | 0.91 | 133.5 | 3.7 | 136.7 | 3.9  | 193.8  | 29.4   | 133.5 | 3.7 |
| Sanford-Spot 22      | 334  | 10144  | 2.8 | 20.0978 | 1.5   | 0.1435  | 3.0   | 0.0209  | 2.6  | 0.88 | 133.5 | 3.5 | 136.2 | 3.8  | 183.6  | 34.0   | 133.5 | 3.5 |
| Sanford-Spot 135     | 468  | 132098 | 2.4 | 19.9387 | 1.4   | 0.1447  | 3.4   | 0.0209  | 3.1  | 0.91 | 133.5 | 4.1 | 137.2 | 4.4  | 202.1  | 32.9   | 133.5 | 4.1 |
| Sanford-Spot 197     | 647  | 36212  | 1.7 | 20.6795 | 1.4   | 0.1395  | 2.3   | 0.0209  | 1.9  | 0.80 | 133.5 | 2.5 | 132.6 | 2.9  | 116.8  | 33.4   | 133.5 | 2.5 |
| Sanford-Spot 208     | 163  | 3995   | 1.9 | 22.1105 | 2.9   | 0.1306  | 4.1   | 0.0210  | 3.0  | 0.72 | 133.7 | 3.9 | 124.7 | 4.8  | NA     | NA     | 133.7 | 3.9 |
| Sanford-Spot 52      | 307  | 8199   | 1.9 | 21.1292 | 2.1   | 0.1367  | 3.7   | 0.0210  | 3.0  | 0.82 | 133.7 | 4.0 | 130.1 | 4.5  | 65.8   | 50.6   | 133.7 | 4.0 |
| Sanford-Spot 73      | 476  | 119556 | 2.3 | 20.0042 | 1.2   | 0.1446  | 3.3   | 0.0210  | 3.0  | 0.93 | 133.9 | 4.0 | 137.1 | 4.2  | 194.5  | 28.8   | 133.9 | 4.0 |
| Sanford-Spot 312     | 384  | 8989   | 2.3 | 21.1444 | 2.0   | 0.1368  | 3.1   | 0.0210  | 2.3  | 0.76 | 133.9 | 3.1 | 130.2 | 3.8  | 64.1   | 48.0   | 133.9 | 3.1 |
| Sanford-Spot 136     | 212  | 10631  | 2.7 | 20.2535 | 1.6   | 0.1429  | 3.2   | 0.0210  | 2.7  | 0.86 | 134.0 | 3.6 | 135.6 | 4.0  | 165.6  | 38.2   | 134.0 | 3.6 |
| Sanford-Spot 203     | 178  | 2113   | 2.9 | 23.5148 | 3.8   | 0.1237  | 4.4   | 0.0211  | 2.2  | 0.51 | 134.6 | 3.0 | 118.4 | 4.9  | NA     | NA     | 134.6 | 3.0 |
| Sanford-Spot 222     | 455  | 5068   | 2.4 | 21.2808 | 1.2   | 0.1367  | 3.3   | 0.0211  | 3.0  | 0.93 | 134.6 | 4.1 | 130.1 | 4.0  | 48.7   | 29.4   | 134.6 | 4.1 |
| Sanford-Spot 39      | 259  | 11599  | 2.3 | 19.5449 | 1.8   | 0.1491  | 3.1   | 0.0211  | 2.5  | 0.82 | 134.9 | 3.4 | 141.1 | 4.1  | 248.2  | 41.0   | 134.9 | 3.4 |
| Sanford-Spot 302     | 215  | 1507   | 2.7 | 24.4422 | 3.7   | 0.1192  | 4.8   | 0.0211  | 3.1  | 0.64 | 134.9 | 4.1 | 114.4 | 5.2  | NA     | NA     | 134.9 | 4.1 |
| Sanford-Spot 224     | 186  | 1610   | 3.9 | 24.2669 | 2.1   | 0.1202  | 3.5   | 0.0212  | 2.8  | 0.79 | 135.1 | 3.7 | 115.3 | 3.8  | NA     | NA     | 135.1 | 3.7 |
| Sanford-Spot 272     | 298  | 5511   | 2.4 | 20.9033 | 1.9   | 0.1405  | 3.2   | 0.0213  | 2.6  | 0.81 | 135.9 | 3.5 | 133.5 | 4.0  | 91.3   | 44.6   | 135.9 | 3.5 |
| Sanford-Spot 20      | 354  | 12533  | 2.1 | 20.4569 | 1.5   | 0.1436  | 2.9   | 0.0213  | 2.5  | 0.86 | 136.0 | 3.4 | 136.2 | 3.8  | 142.2  | 35.4   | 136.0 | 3.4 |
| Sanford-Spot 164     | 185  | 29788  | 4.4 | 19.7890 | 2.1   | 0.1487  | 3.6   | 0.0214  | 2.9  | 0.80 | 136.2 | 3.9 | 140.8 | 4.7  | 219.6  | 49.1   | 136.2 | 3.9 |
| Sanford-Spot 158     | 429  | 36185  | 2.0 | 20.3594 | 1.3   | 0.1446  | 2.8   | 0.0214  | 2.5  | 0.89 | 136.2 | 3.4 | 137.1 | 3.6  | 153.4  | 30.9   | 136.2 | 3.4 |
| Sanford-Spot 9       | 302  | 104814 | 2.1 | 20.0246 | 1.9   | 0.1470  | 3.3   | 0.0214  | 2.7  | 0.83 | 136.2 | 3.7 | 139.3 | 4.3  | 192.2  | 43.1   | 136.2 | 3.7 |
| Sanford-Spot 249     | 385  | 4849   | 2.3 | 21.2645 | 1.7   | 0.1385  | 3.9   | 0.0214  | 3.5  | 0.91 | 136.3 | 4.8 | 131.7 | 4.8  | 50.6   | 39.5   | 136.3 | 4.8 |
| Sanford-Spot 83      | 226  | 3824   | 1.8 | 21.6686 | 2.0   | 0.1364  | 3.6   | 0.0215  | 3.0  | 0.84 | 136.8 | 4.1 | 129.9 | 4.4  | 5.5    | 48.2   | 136.8 | 4.1 |
| Sanford-Spot 308     | 130  | 1959   | 3.6 | 23.9046 | 5.0   | 0.1297  | 5.8   | 0.0225  | 2.8  | 0.49 | 143.4 | 4.0 | 123.8 | 6.7  | NA     | NA     | 143.4 | 4.0 |
| Sanford-Spot 271     | 154  | 4613   | 2.2 | 19.2456 | 3.3   | 0.2102  | 4.9   | 0.0294  | 3.7  | 0.74 | 186.5 | 6.8 | 193.8 | 8.7  | 283.7  | 75.5   | 186.5 | 6.8 |
| Sanford-Spot 140     | 194  | 4139   | 0.8 | 14.7815 | 1.6   | 0.4269  | 2.6   | 0.0458  | 2.1  | 0.79 | 288.6 | 5.8 | 360.9 | 7.9  | 857.9  | 33.6   | 288.6 | 5.8 |
| Sanford-Spot 300     | 661  | 38845  | 2.6 | 18.9743 | 1.2   | 0.3407  | 3.3   | 0.0469  | 3.1  | 0.93 | 295.5 | 8.9 | 297.7 | 8.5  | 316.0  | 26.8   | 295.5 | 8.9 |
| Upper White River    |      |        |     |         |       |         |       |         |      |      |       |     |       |      |        |        |       |     |
| Upper White-Spot 186 | 207  | 10     | 2.2 | 0.6949  | NA    | -0.0267 | NA    | -0.0001 | 18.8 | NA   | 0.9   | 0.2 | 27.5  | NA   | 0.0    | NA     | 0.9   | 0.2 |
| Upper White-Spot 254 | 346  | 81     | 2.4 | 3.1485  | 45.2  | 0.0060  | 47.0  | 0.0001  | 12.5 | 0.27 | 0.9   | 0.1 | 6.1   | 2.8  | 3558.3 | 1485.4 | 0.9   | 0.1 |
| Upper White-Spot 124 | 598  | 1331   | 2.5 | 4.3584  | 16.7  | 0.0045  | 18.9  | 0.0001  | 9.0  | 0.47 | 0.9   | 0.1 | 4.6   | 0.9  | 3048.2 | 268.7  | 0.9   | 0.1 |
| Upper White-Spot 69  | 1037 | 608    | 2.5 | 7.7788  | 10.8  | 0.0028  | 12.0  | 0.0002  | 5.2  | 0.43 | 1.0   | 0.1 | 2.8   | 0.3  | 2078.3 | 191.3  | 1.0   | 0.1 |
| Upper White-Spot 3   | 163  | 57     | 3.4 | 6.5791  | 73.7  | 0.0086  | 74.3  | 0.0004  | 9.7  | 0.13 | 2.6   | 0.3 | 8.7   | 6.4  | 2368.5 | 686.0  | 2.6   | 0.3 |
| Upper White-Spot 130 | 413  | 83     | 2.1 | 67.6496 | 104.1 | 0.0009  | 105.0 | 0.0004  | 13.7 | 0.13 | 2.8   | 0.4 | 0.9   | 1.0  | 0.0    | 0.0    | 2.8   | 0.4 |
| Upper White-Spot 172 | 217  | 3381   | 4.3 | 5.0675  | 0.2   | 0.0161  | 18.1  | 0.0006  | 18.1 | 1.00 | 3.8   | 0.7 | 16.2  | 2.9  | 2804.3 | 3.2    | 3.8   | 0.7 |
| Upper White-Spot 198 | 587  | 592    | 1.6 | 42.1060 | 15.1  | 0.0026  | 15.6  | 0.0008  | 3.9  | 0.25 | 5.0   | 0.2 | 2.6   | 0.4  | 1944.3 | 560.1  | 5.0   | 0.2 |
| Upper White-Spot 43  | 788  | 501    | 1.5 | 32.9870 | 12.1  | 0.0048  | 12.6  | 0.0012  | 3.5  | 0.28 | 7.4   | 0.3 | 4.9   | 0.6  | 1126.9 | 370.6  | 7.4   | 0.3 |
| Upper White-Spot 294 | 326  | 452    | 2.3 | 15.6475 | 26.3  | 0.0104  | 26.6  | 0.0012  | 3.9  | 0.15 | 7.6   | 0.3 | 10.5  | 2.8  | 738.6  | 566.2  | 7.6   | 0.3 |
| Upper White-Spot 51  | 1178 | 603    | 1.2 | 41.6097 | 7.6   | 0.0044  | 8.2   | 0.0013  | 3.1  | 0.38 | 8.5   | 0.3 | 4.4   | 0.4  | 1900.7 | 278.8  | 8.5   | 0.3 |
| Upper White-Spot 210 | 905  | 2312   | 0.8 | 22.1394 | 5.1   | 0.0084  | 5.7   | 0.0013  | 2.6  | 0.45 | 8.7   | 0.2 | 8.5   | 0.5  | 46.5   | 124.8  | 8.7   | 0.2 |
| Upper White-Spot 39  | 199  | 241    | 1.8 | 65.2875 | 64.9  | 0.0028  | 65.0  | 0.0013  | 4.6  | 0.07 | 8.7   | 0.4 | 2.9   | 1.9  | 0.0    | 66.1   | 8.7   | 0.4 |
| Upper White-Spot 170 | 471  | 764    | 1.9 | 7.9615  | 5.0   | 0.0234  | 6.3   | 0.0014  | 3.9  | 0.62 | 8.7   | 0.3 | 23.5  | 1.5  | 2037.3 | 88.2   | 8.7   | 0.3 |
| Upper White-Spot 235 | 849  | 1330   | 1.1 | 24.4843 | 7.4   | 0.0077  | 8.2   | 0.0014  | 3.6  | 0.44 | 8.8   | 0.3 | 7.8   | 0.6  | 297.4  | 189.4  | 8.8   | 0.3 |
| Upper White-Spot 24  | 1084 | 1953   | 2.2 | 19.7542 | 3.9   | 0.0098  | 5.2   | 0.0014  | 3.4  | 0.66 | 9.0   | 0.3 | 9.9   | 0.5  | 223.7  | 89.7   | 9.0   | 0.3 |
| Upper White-Spot 265 | 583  | 660    | 1.1 | 22.3259 | 7.3   | 0.0087  | 8.0   | 0.0014  | 3.4  | 0.42 | 9.1   | 0.3 | 8.8   | 0.7  | 67.0   | 177.4  | 9.1   | 0.3 |
| Upper White-Spot 144 | 9096 | 2683   | 0.6 | 17.4522 | 4.4   | 0.0114  |       |         |      |      |       |     |       |      |        |        |       |     |

|                      |      |        |     |          |      |         |      |        |     |      |       |      |       |      |        |       |       |      |
|----------------------|------|--------|-----|----------|------|---------|------|--------|-----|------|-------|------|-------|------|--------|-------|-------|------|
| Upper White-Spot 264 | 1106 | 748    | 3.3 | 6.0031   | 3.0  | 0.0385  | 4.2  | 0.0017 | 2.9 | 0.71 | 10.8  | 0.3  | 38.3  | 1.6  | 2523.6 | 49.6  | 10.8  | 0.3  |
| Upper White-Spot 267 | 327  | 154    | 3.7 | 3.9068   | 1.9  | 0.0669  | 5.9  | 0.0019 | 5.6 | 0.95 | 12.2  | 0.7  | 65.8  | 3.8  | 3222.0 | 29.8  | 12.2  | 0.7  |
| Upper White-Spot 204 | 183  | 191    | 2.9 | 6.5621   | 25.0 | 0.0399  | 25.5 | 0.0019 | 4.9 | 0.19 | 12.2  | 0.6  | 39.7  | 9.9  | 2372.9 | 433.6 | 12.2  | 0.6  |
| Upper White-Spot 240 | 805  | 189    | 2.8 | 3.2166   | 1.3  | 0.0965  | 4.6  | 0.0023 | 4.4 | 0.96 | 14.5  | 0.6  | 93.5  | 4.1  | 3525.3 | 20.1  | 14.5  | 0.6  |
| Upper White-Spot 93  | 91   | 326    | 1.9 | 24.5498  | 12.1 | 0.0127  | 13.1 | 0.0023 | 5.1 | 0.39 | 14.5  | 0.7  | 12.8  | 1.7  | 304.2  | 310.1 | 14.5  | 0.7  |
| Upper White-Spot 103 | 1041 | 1790   | 2.1 | 21.6239  | 3.6  | 0.0145  | 4.7  | 0.0023 | 3.0 | 0.64 | 14.6  | 0.4  | 14.6  | 0.7  | 10.4   | 87.4  | 14.6  | 0.4  |
| Upper White-Spot 71  | 139  | 2673   | 2.2 | 3.4096   | 4.8  | 0.0920  | 9.0  | 0.0023 | 7.7 | 0.85 | 14.7  | 1.1  | 89.4  | 7.7  | 3435.1 | 74.3  | 14.7  | 1.1  |
| Upper White-Spot 7   | 941  | 704    | 1.6 | 16.7854  | 3.2  | 0.0192  | 4.3  | 0.0023 | 2.9 | 0.67 | 15.0  | 0.4  | 19.3  | 0.8  | 588.2  | 69.4  | 15.0  | 0.4  |
| Upper White-Spot 259 | 224  | 286    | 2.4 | 3.2825   | 4.0  | 0.0991  | 6.5  | 0.0024 | 5.2 | 0.79 | 15.2  | 0.8  | 95.9  | 6.0  | 3494.0 | 61.5  | 15.2  | 0.8  |
| Upper White-Spot 297 | 679  | 1134   | 1.3 | 16.1089  | 3.6  | 0.0207  | 4.4  | 0.0024 | 2.6 | 0.59 | 15.5  | 0.4  | 20.8  | 0.9  | 676.8  | 76.6  | 15.5  | 0.4  |
| Upper White-Spot 166 | 3811 | 765    | 8.4 | 9.5779   | 2.8  | 0.0348  | 3.9  | 0.0024 | 2.7 | 0.69 | 15.6  | 0.4  | 34.7  | 1.3  | 1703.9 | 52.5  | 15.6  | 0.4  |
| Upper White-Spot 217 | 290  | 1222   | 1.8 | 29.3350  | 9.7  | 0.0114  | 10.5 | 0.0024 | 3.8 | 0.37 | 15.6  | 0.6  | 11.5  | 1.2  | 782.6  | 275.5 | 15.6  | 0.6  |
| Upper White-Spot 91  | 862  | 1142   | 6.4 | 18.5143  | 5.3  | 0.0187  | 6.1  | 0.0025 | 3.1 | 0.50 | 16.1  | 0.5  | 18.8  | 1.1  | 371.5  | 119.9 | 16.1  | 0.5  |
| Upper White-Spot 159 | 1913 | 2216   | 2.0 | 20.0043  | 3.2  | 0.0178  | 4.0  | 0.0026 | 2.4 | 0.60 | 16.6  | 0.4  | 17.9  | 0.7  | 194.5  | 74.6  | 16.6  | 0.4  |
| Upper White-Spot 85  | 346  | 565    | 1.2 | 14.1173  | 19.1 | 0.0254  | 19.5 | 0.0026 | 4.0 | 0.21 | 16.7  | 0.7  | 25.4  | 4.9  | 952.6  | 394.3 | 16.7  | 0.7  |
| Upper White-Spot 84  | 237  | 1082   | 1.5 | 8.6716   | 6.5  | 0.0414  | 8.1  | 0.0026 | 4.8 | 0.60 | 16.8  | 0.8  | 41.2  | 3.3  | 1884.9 | 117.2 | 16.8  | 0.8  |
| Upper White-Spot 155 | 319  | 313    | 1.2 | 2.3841   | 2.1  | 0.1524  | 9.9  | 0.0026 | 9.7 | 0.98 | 17.0  | 1.6  | 144.0 | 13.3 | 3980.3 | 30.9  | 17.0  | 1.6  |
| Upper White-Spot 311 | 295  | 1005   | 1.2 | 7.4268   | 5.5  | 0.0496  | 6.8  | 0.0027 | 3.9 | 0.58 | 17.2  | 0.7  | 49.2  | 3.3  | 2159.4 | 96.7  | 17.2  | 0.7  |
| Upper White-Spot 62  | 285  | 988    | 2.4 | 16.1864  | 6.4  | 0.0228  | 7.4  | 0.0027 | 3.9 | 0.52 | 17.2  | 0.7  | 22.9  | 1.7  | 666.5  | 136.5 | 17.2  | 0.7  |
| Upper White-Spot 46  | 196  | 212    | 1.6 | 8.0462   | 26.8 | 0.0482  | 27.1 | 0.0028 | 4.3 | 0.16 | 18.1  | 0.8  | 47.8  | 12.7 | 2018.6 | 483.7 | 18.1  | 0.8  |
| Upper White-Spot 181 | 532  | 151    | 4.0 | 2.4059   | 9.3  | 0.1633  | 10.7 | 0.0028 | 5.3 | 0.50 | 18.3  | 1.0  | 153.6 | 15.3 | 3966.7 | 140.0 | 18.3  | 1.0  |
| Upper White-Spot 246 | 223  | 237    | 1.8 | 4.3490   | 3.8  | 0.0991  | 6.4  | 0.0031 | 5.1 | 0.80 | 20.1  | 1.0  | 96.0  | 5.8  | 3051.6 | 61.4  | 20.1  | 1.0  |
| Upper White-Spot 271 | 186  | 141    | 1.7 | 3.3470   | 4.5  | 0.1410  | 8.0  | 0.0034 | 6.6 | 0.83 | 22.0  | 1.4  | 133.9 | 10.0 | 3463.9 | 69.3  | 22.0  | 1.4  |
| Upper White-Spot 160 | 106  | 216    | 3.8 | -42.3343 | 15.9 | -0.0123 | 16.6 | 0.0038 | 4.8 | 0.29 | 24.2  | 1.2  | 12.5  | 2.1  | 0.0    | 0.0   | 24.2  | 1.2  |
| Upper White-Spot 48  | 219  | 1000   | 4.7 | 31.8766  | 11.1 | 0.0166  | 11.6 | 0.0038 | 3.3 | 0.29 | 24.7  | 0.8  | 16.7  | 1.9  | 1023.7 | 330.8 | 24.7  | 0.8  |
| Upper White-Spot 127 | 185  | 1151   | 3.7 | 24.6750  | 16.7 | 0.0217  | 17.2 | 0.0039 | 4.1 | 0.24 | 24.9  | 1.0  | 21.8  | 3.7  | 317.3  | 430.4 | 24.9  | 1.0  |
| Upper White-Spot 191 | 184  | 1501   | 4.3 | 24.6107  | 4.7  | 0.0218  | 5.9  | 0.0039 | 3.5 | 0.60 | 25.0  | 0.9  | 21.9  | 1.3  | 310.6  | 119.9 | 25.0  | 0.9  |
| Upper White-Spot 30  | 502  | 25295  | 7.2 | 16.4654  | 2.4  | 0.0333  | 3.4  | 0.0040 | 2.5 | 0.72 | 25.6  | 0.6  | 33.3  | 1.1  | 629.8  | 51.2  | 25.6  | 0.6  |
| Upper White-Spot 95  | 161  | 238    | 2.0 | 3.0545   | 6.1  | 0.1889  | 9.6  | 0.0042 | 7.4 | 0.77 | 26.9  | 2.0  | 175.7 | 15.5 | 3604.9 | 94.4  | 26.9  | 2.0  |
| Upper White-Spot 299 | 368  | 1176   | 4.2 | 26.1381  | 4.5  | 0.0222  | 5.4  | 0.0042 | 3.1 | 0.57 | 27.1  | 0.8  | 22.3  | 1.2  | 467.3  | 118.3 | 27.1  | 0.8  |
| Upper White-Spot 222 | 178  | 151    | 2.1 | 9.1078   | 0.0  | 0.0729  | 5.2  | 0.0048 | 5.2 | 1.00 | 31.0  | 1.6  | 71.5  | 3.6  | 1796.0 | 0.0   | 31.0  | 1.6  |
| Upper White-Spot 112 | 358  | 93     | 2.2 | 24.6915  | 0.0  | 0.0279  | 9.3  | 0.0050 | 9.3 | 1.00 | 32.1  | 3.0  | 28.0  | 2.6  | 319.0  | 0.0   | 32.1  | 3.0  |
| Upper White-Spot 134 | 128  | 366    | 2.4 | 2.1008   | 0.8  | 0.3284  | 5.4  | 0.0050 | 5.3 | 0.99 | 32.2  | 1.7  | 288.4 | 13.4 | 4168.5 | 12.4  | 32.2  | 1.7  |
| Upper White-Spot 66  | 911  | 2430   | 6.0 | 24.3596  | 4.4  | 0.0460  | 5.0  | 0.0081 | 2.2 | 0.44 | 52.2  | 1.1  | 45.6  | 2.2  | 284.4  | 113.2 | 52.2  | 1.1  |
| Upper White-Spot 75  | 117  | 403    | 2.5 | 12.9778  | 7.3  | 0.0914  | 9.9  | 0.0086 | 6.8 | 0.68 | 55.2  | 3.7  | 88.8  | 8.4  | 1122.6 | 144.9 | 55.2  | 3.7  |
| Upper White-Spot 88  | 338  | 1155   | 3.4 | 7.1815   | 5.5  | 0.1823  | 5.9  | 0.0095 | 2.3 | 0.39 | 60.9  | 1.4  | 170.0 | 9.3  | 2217.8 | 94.8  | 60.9  | 1.4  |
| Upper White-Spot 218 | 360  | 482    | 7.4 | 5.5787   | 30.7 | 0.2490  | 31.5 | 0.0101 | 6.8 | 0.22 | 64.6  | 4.4  | 225.7 | 63.7 | 2646.0 | 523.5 | 64.6  | 4.4  |
| Upper White-Spot 227 | 1110 | 7448   | 2.0 | 17.4860  | 2.2  | 0.1219  | 3.0  | 0.0155 | 2.0 | 0.67 | 98.9  | 2.0  | 116.8 | 3.3  | 498.8  | 48.9  | 98.9  | 2.0  |
| Upper White-Spot 141 | 474  | 48894  | 2.1 | 18.4462  | 1.8  | 0.1684  | 3.4  | 0.0225 | 2.8 | 0.84 | 143.6 | 4.0  | 158.0 | 4.9  | 379.8  | 41.3  | 143.6 | 4.0  |
| Upper White-Spot 76  | 1835 | 35813  | 2.8 | 18.6793  | 1.2  | 0.1699  | 2.2  | 0.0230 | 1.8 | 0.84 | 146.7 | 2.7  | 159.4 | 3.2  | 351.5  | 27.1  | 146.7 | 2.7  |
| Upper White-Spot 49  | 1012 | 19030  | 9.2 | 18.6112  | 1.0  | 0.1719  | 2.2  | 0.0232 | 2.0 | 0.89 | 147.9 | 2.9  | 161.1 | 3.3  | 359.8  | 22.6  | 147.9 | 2.9  |
| Upper White-Spot 77  | 996  | 9929   | 4.1 | 20.4980  | 1.7  | 0.1569  | 2.8  | 0.0233 | 2.2 | 0.80 | 148.6 | 3.3  | 148.0 | 3.8  | 137.5  | 39.2  | 148.6 | 3.3  |
| Upper White-Spot 273 | 568  | 15529  | 2.2 | 20.2923  | 1.5  | 0.1591  | 3.0  | 0.0234 | 2.7 | 0.88 | 149.2 | 3.9  | 149.9 | 4.2  | 161.1  | 34.3  | 149.2 | 3.9  |
| Upper White-Spot 293 | 495  | 4717   | 2.6 | 18.8838  | 2.2  | 0.1709  | 3.2  | 0.0234 | 2.3 | 0.72 | 149.2 | 3.4  | 160.2 | 4.8  | 326.9  | 51.0  | 149.2 | 3.4  |
| Upper White-Spot 182 | 257  | 2917   | 2.7 | 22.4081  | 1.8  | 0.1453  | 3.1  | 0.0236 | 2.5 | 0.82 | 150.5 | 3.7  | 137.8 | 3.9  | 76.0   | 43.2  | 150.5 | 3.7  |
| Upper White-Spot 145 | 1045 | 11646  | 4.6 | 19.8756  | 1.1  | 0.1639  | 2.5  | 0.0236 | 2.3 | 0.89 | 150.5 | 3.4  | 154.1 | 3.6  | 209.5  | 26.5  | 150.5 | 3.4  |
| Upper White-Spot 21  | 692  | 1937   | 3.3 | 13.0635  | 3.0  | 0.2509  | 3.6  | 0.0238 | 2.0 | 0.56 | 151.5 | 3.0  | 227.3 | 7.3  | 1109.4 | 59.3  | 151.5 | 3.0  |
| Upper White-Spot 303 | 287  | 1494   | 2.2 | 11.2654  | 2.3  | 0.3045  | 3.3  | 0.0249 | 2.3 | 0.71 | 158.4 | 3.6  | 269.9 | 7.7  | 1399.1 | 43.9  | 158.4 | 3.6  |
| Upper White-Spot 315 | 1856 | 42620  | 0.5 | 19.3555  | 0.7  | 0.2581  | 2.2  | 0.0362 | 2.0 | 0.94 | 229.5 | 4.6  | 233.2 | 4.5  | 270.6  | 17.0  | 229.5 | 4.6  |
| Upper White-Spot 277 | 3875 | 8023   | 1.4 | 17.0774  | 0.9  | 0.3295  | 1.8  | 0.0408 | 1.6 | 0.87 | 257.9 | 4.0  | 289.2 | 4.6  | 550.7  | 19.7  | 257.9 | 4.0  |
| Upper White-Spot 90  | 5273 | 28709  | 2.3 | 18.3686  | 0.6  | 0.3323  | 4.7  | 0.0443 | 4.6 | 0.99 | 279.3 | 12.6 | 291.3 | 11.8 | 389.3  | 12.9  | 279.3 | 12.6 |
| Upper White-Spot 98  | 1850 | 9241   | 3.0 | 17.1099  | 0.8  | 0.3689  | 2.1  | 0.0458 | 2.0 | 0.93 | 288.6 | 5.5  | 318.9 | 5.7  | 546.5  | 16.9  | 288.6 | 5.5  |
| Upper White-Spot 153 | 642  | 35449  | 2.8 | 18.5744  | 0.9  | 0.3403  | 2.4  | 0.0458 | 2.2 | 0.92 | 288.9 | 6.2  | 297.4 | 6.2  | 364.2  | 21.3  | 288.9 | 6.2  |
| Upper White-Spot 63  | 639  | 11166  | 1.0 | 19.2799  | 1.0  | 0.3281  | 2.6  | 0.0459 | 2.5 | 0.93 | 289.2 | 7.0  | 288.1 | 6.6  | 279.6  | 22.0  | 289.2 | 7.0  |
| Upper White-Spot 125 | 543  | 36400  | 3.6 | 18.5718  | 1.0  | 0.3411  | 2.9  | 0.0459 | 2.7 | 0.94 | 289.6 | 7.7  | 298.0 | 7.5  | 364.6  | 23.0  | 289.6 | 7.7  |
| Upper White-Spot 107 | 625  | 53313  | 2.9 | 18.1391  | 0.9  | 0.3494  | 2.4  | 0.0460 | 2.2 | 0.93 | 289.7 | 6.3  | 304.3 | 6.3  | 417.5  | 19.4  | 289.7 | 6.3  |
| Upper White-Spot 206 | 775  | 20644  | 3.0 | 18.9784  | 1.1  | 0.3344  | 2.3  | 0.0460 | 2.1 | 0.89 | 290.1 | 5.9  | 292.9 | 6.0  | 315.5  | 24.3  | 290.1 | 5.9  |
| Upper White-Spot 2   | 1742 | 12239  | 1.7 | 18.4865  | 0.9  | 0.3433  | 2.4  | 0.0460 | 2.2 | 0.92 | 290.1 | 6.2  | 299.7 | 6.2  | 374.9  | 21.1  | 290.1 | 6.2  |
| Upper White-Spot 120 | 835  | 430888 | 3.1 | 17.9131  | 1.0  | 0.3554  | 2.2  | 0.0462 | 2.0 | 0.88 | 291.0 | 5.6  | 308.8 | 5.9  | 445.4  | 23.1  | 291.0 | 5.6  |
| Upper White-Spot 118 | 800  | 137944 | 2.6 | 18.7901  | 0.8  | 0.3393  | 2.3  | 0.0462 | 2.1 | 0.93 | 291.4 | 6.1  | 296.7 | 5.9  | 338.1  | 18.6  | 291.4 | 6.1  |
| Upper White-Spot 258 | 1007 | 61751  | 2.3 | 17.9033  | 0.9  | 0.3564  | 2.3  | 0.0463 | 2.1 | 0.91 | 291.6 | 6.1  | 309.5 | 6.2  | 446.6  | 20.9  | 291.6 | 6.1  |
| Upper White-Spot 256 | 295  | 51341  | 1.7 | 19.1629  | 1.1  | 0.3333  | 2.5  | 0.0463 | 2.3 | 0.91 | 291.9 | 6.4  | 292.0 | 6.3  | 293.5  | 24.0  | 291.9 | 6.4  |
| Upper White-Spot 199 | 744  | 75657  | 2.6 | 19.0092  | 0.9  | 0.3360  | 2.4  | 0.0463 | 2.3 | 0.94 | 291.9 | 6.5  | 294.2 | 6.2  | 311.8  | 19.5  | 291.9 | 6.5  |
| Upper White-Spot 137 | 786  | 15137  | 1.8 | 19.1894  | 0.9  | 0.3330  | 2.2  | 0.0463 | 2.0 | 0.91 | 292.0 | 5.7  | 291.9 | 5.5  | 290.3  | 20.5  | 292.0 | 5.7  |
| Upper White-Spot 306 | 253  | 6786   | 1.9 | 17.1494  | 1.7  | 0.3735  | 3.5  | 0.0465 | 3.0 | 0.87 | 292.7 | 8.7  | 322.2 | 9.7  | 541.5  | 37.9  | 292.7 | 8.7  |
| Upper White-Spot 255 | 2100 | 45082  | 3.2 | 18.6626  | 0.8  | 0.3435  | 2.3  | 0.0465 | 2.2 | 0.93 | 293.0 | 6.2  | 299.8 | 6.0  | 353.6  | 18.9  | 293.0 | 6.2  |
| Upper White-Spot 168 | 1454 | 10795  | 4.6 | 17.6380  | 0.7  | 0.3638  | 2.0  | 0.0465 | 1.9 | 0.94 | 293.3 | 5.5  | 315.1 | 5.5  | 479.7  | 15.9  | 293.3 | 5.5  |
| Upper White-Spot 37  | 436  | 22588  | 1.1 | 18.5210  | 1.0  | 0.3465  | 2.5  | 0.0465 | 2.3 | 0.92 | 293.3 | 6.7  | 302.1 | 6.6  | 370.7  | 21.9  | 293.3 | 6.7  |
| Upper White-Spot 241 | 1156 | 44329  | 2.7 | 19.0931  |      |         |      |        |     |      |       |      |       |      |        |       |       |      |

|                      |      |        |     |         |     |        |     |        |     |      |       |      |       |      |       |      |       |      |
|----------------------|------|--------|-----|---------|-----|--------|-----|--------|-----|------|-------|------|-------|------|-------|------|-------|------|
| Upper White-Spot 309 | 580  | 31781  | 2.4 | 18.9699 | 0.9 | 0.3408 | 2.4 | 0.0469 | 2.3 | 0.93 | 295.4 | 6.6  | 297.8 | 6.3  | 316.5 | 19.7 | 295.4 | 6.6  |
| Upper White-Spot 231 | 643  | 33050  | 2.3 | 19.2454 | 1.0 | 0.3360 | 2.5 | 0.0469 | 2.3 | 0.92 | 295.5 | 6.8  | 294.2 | 6.5  | 283.7 | 22.4 | 295.5 | 6.8  |
| Upper White-Spot 81  | 609  | 7051   | 3.0 | 17.9667 | 1.0 | 0.3600 | 2.3 | 0.0469 | 2.0 | 0.89 | 295.5 | 5.8  | 312.2 | 6.1  | 438.7 | 23.4 | 295.5 | 5.8  |
| Upper White-Spot 8   | 1117 | 8279   | 3.1 | 16.7903 | 2.5 | 0.3853 | 3.3 | 0.0469 | 2.1 | 0.63 | 295.6 | 6.0  | 330.9 | 9.3  | 587.6 | 55.3 | 295.6 | 6.0  |
| Upper White-Spot 300 | 453  | 19342  | 3.1 | 19.1455 | 1.0 | 0.3382 | 2.7 | 0.0470 | 2.5 | 0.93 | 295.8 | 7.2  | 295.8 | 6.8  | 295.6 | 22.2 | 295.8 | 7.2  |
| Upper White-Spot 274 | 528  | 59193  | 3.8 | 18.5934 | 1.1 | 0.3482 | 2.5 | 0.0470 | 2.2 | 0.89 | 295.8 | 6.3  | 303.4 | 6.4  | 361.9 | 25.0 | 295.8 | 6.3  |
| Upper White-Spot 115 | 1250 | 859118 | 2.8 | 18.9783 | 0.8 | 0.3412 | 2.7 | 0.0470 | 2.5 | 0.95 | 295.9 | 7.3  | 298.1 | 6.9  | 315.5 | 19.1 | 295.9 | 7.3  |
| Upper White-Spot 17  | 1100 | 43999  | 3.4 | 18.9895 | 0.7 | 0.3410 | 2.1 | 0.0470 | 1.9 | 0.93 | 295.9 | 5.6  | 297.9 | 5.3  | 314.2 | 17.0 | 295.9 | 5.6  |
| Upper White-Spot 250 | 565  | 5723   | 3.5 | 18.3513 | 1.0 | 0.3529 | 2.0 | 0.0470 | 1.7 | 0.87 | 295.9 | 5.0  | 306.9 | 5.2  | 391.4 | 21.9 | 295.9 | 5.0  |
| Upper White-Spot 236 | 1329 | 159010 | 5.3 | 18.8417 | 0.9 | 0.3438 | 2.1 | 0.0470 | 1.9 | 0.89 | 295.9 | 5.4  | 300.0 | 5.5  | 332.0 | 21.4 | 295.9 | 5.4  |
| Upper White-Spot 263 | 996  | 27267  | 4.2 | 19.1075 | 0.9 | 0.3390 | 2.4 | 0.0470 | 2.2 | 0.93 | 295.9 | 6.4  | 296.4 | 6.2  | 300.1 | 20.1 | 295.9 | 6.4  |
| Upper White-Spot 164 | 998  | 24453  | 2.3 | 18.6009 | 0.9 | 0.3483 | 2.3 | 0.0470 | 2.2 | 0.92 | 296.0 | 6.2  | 303.4 | 6.1  | 361.0 | 20.3 | 296.0 | 6.2  |
| Upper White-Spot 136 | 814  | 30434  | 4.4 | 18.9945 | 1.0 | 0.3411 | 2.4 | 0.0470 | 2.1 | 0.91 | 296.0 | 6.2  | 298.0 | 6.1  | 313.6 | 22.4 | 296.0 | 6.2  |
| Upper White-Spot 288 | 787  | 15992  | 2.1 | 17.9376 | 1.0 | 0.3612 | 2.0 | 0.0470 | 1.8 | 0.86 | 296.0 | 5.1  | 313.1 | 5.5  | 442.4 | 23.1 | 296.0 | 5.1  |
| Upper White-Spot 126 | 909  | 21807  | 3.1 | 19.0398 | 0.9 | 0.3404 | 2.2 | 0.0470 | 2.0 | 0.92 | 296.1 | 5.9  | 297.5 | 5.7  | 308.2 | 19.7 | 296.1 | 5.9  |
| Upper White-Spot 174 | 592  | 208792 | 2.8 | 18.6504 | 1.2 | 0.3478 | 3.0 | 0.0470 | 2.7 | 0.92 | 296.3 | 7.9  | 303.0 | 7.8  | 355.0 | 26.8 | 296.3 | 7.9  |
| Upper White-Spot 251 | 2239 | 13480  | 5.1 | 17.5138 | 0.9 | 0.3705 | 2.0 | 0.0471 | 1.8 | 0.90 | 296.5 | 5.2  | 320.0 | 5.5  | 495.3 | 19.3 | 296.5 | 5.2  |
| Upper White-Spot 11  | 812  | 81220  | 3.3 | 18.7834 | 1.0 | 0.3455 | 2.5 | 0.0471 | 2.3 | 0.91 | 296.5 | 6.7  | 301.3 | 6.6  | 339.0 | 23.4 | 296.5 | 6.7  |
| Upper White-Spot 138 | 698  | 5487   | 2.7 | 16.7540 | 1.6 | 0.3876 | 2.6 | 0.0471 | 2.1 | 0.81 | 296.7 | 6.2  | 332.6 | 7.5  | 592.3 | 33.8 | 296.7 | 6.2  |
| Upper White-Spot 6   | 1407 | 144629 | 2.5 | 18.5744 | 0.8 | 0.3498 | 2.3 | 0.0471 | 2.2 | 0.93 | 296.8 | 6.3  | 304.6 | 6.1  | 364.2 | 18.9 | 296.8 | 6.3  |
| Upper White-Spot 193 | 739  | 26777  | 2.8 | 18.0647 | 0.9 | 0.3597 | 2.3 | 0.0471 | 2.1 | 0.93 | 296.8 | 6.2  | 312.0 | 6.2  | 426.6 | 19.5 | 296.8 | 6.2  |
| Upper White-Spot 4   | 717  | 24196  | 3.0 | 19.0274 | 0.9 | 0.3416 | 2.2 | 0.0471 | 2.0 | 0.91 | 297.0 | 5.8  | 298.4 | 5.7  | 309.7 | 21.0 | 297.0 | 5.8  |
| Upper White-Spot 253 | 611  | 23783  | 4.3 | 18.6388 | 1.0 | 0.3488 | 2.3 | 0.0472 | 2.1 | 0.90 | 297.0 | 6.0  | 303.8 | 6.0  | 356.4 | 22.5 | 297.0 | 6.0  |
| Upper White-Spot 106 | 1324 | 37483  | 2.6 | 19.2143 | 0.9 | 0.3384 | 2.5 | 0.0472 | 2.3 | 0.93 | 297.1 | 6.8  | 296.0 | 6.5  | 287.4 | 21.2 | 297.1 | 6.8  |
| Upper White-Spot 73  | 1595 | 66210  | 4.0 | 18.9933 | 1.0 | 0.3424 | 2.8 | 0.0472 | 2.6 | 0.93 | 297.1 | 7.5  | 299.0 | 7.2  | 313.8 | 23.3 | 297.1 | 7.5  |
| Upper White-Spot 64  | 506  | 4659   | 4.1 | 18.1159 | 1.2 | 0.3589 | 2.4 | 0.0472 | 2.1 | 0.87 | 297.1 | 6.1  | 311.4 | 6.4  | 420.3 | 26.5 | 297.1 | 6.1  |
| Upper White-Spot 129 | 1442 | 11231  | 2.8 | 17.2433 | 1.0 | 0.3773 | 2.0 | 0.0472 | 1.8 | 0.88 | 297.2 | 5.2  | 325.0 | 5.7  | 529.5 | 21.7 | 297.2 | 5.2  |
| Upper White-Spot 122 | 607  | 23401  | 3.6 | 18.7046 | 1.0 | 0.3478 | 2.4 | 0.0472 | 2.2 | 0.91 | 297.2 | 6.3  | 303.1 | 6.2  | 348.5 | 22.0 | 297.2 | 6.3  |
| Upper White-Spot 83  | 676  | 7372   | 2.5 | 17.6376 | 1.6 | 0.3689 | 2.3 | 0.0472 | 1.7 | 0.75 | 297.3 | 5.1  | 318.8 | 6.4  | 479.7 | 34.5 | 297.3 | 5.1  |
| Upper White-Spot 128 | 1152 | 111584 | 2.6 | 18.7440 | 0.7 | 0.3472 | 2.2 | 0.0472 | 2.1 | 0.95 | 297.3 | 6.0  | 302.6 | 5.7  | 343.7 | 14.8 | 297.3 | 6.0  |
| Upper White-Spot 54  | 877  | 21774  | 3.4 | 19.3615 | 1.0 | 0.3362 | 2.6 | 0.0472 | 2.4 | 0.92 | 297.4 | 7.0  | 294.3 | 6.7  | 269.9 | 23.6 | 297.4 | 7.0  |
| Upper White-Spot 135 | 690  | 57546  | 5.3 | 19.2436 | 0.9 | 0.3384 | 2.5 | 0.0472 | 2.3 | 0.93 | 297.5 | 6.7  | 296.0 | 6.4  | 283.9 | 21.2 | 297.5 | 6.7  |
| Upper White-Spot 146 | 1771 | 254314 | 2.6 | 18.9757 | 0.8 | 0.3432 | 2.3 | 0.0472 | 2.1 | 0.94 | 297.5 | 6.2  | 299.6 | 5.9  | 315.8 | 18.4 | 297.5 | 6.2  |
| Upper White-Spot 262 | 787  | 12281  | 4.8 | 18.0038 | 0.8 | 0.3619 | 2.1 | 0.0473 | 1.9 | 0.93 | 297.7 | 5.5  | 313.6 | 5.5  | 434.2 | 16.8 | 297.7 | 5.5  |
| Upper White-Spot 226 | 780  | 38547  | 3.0 | 19.0289 | 0.9 | 0.3425 | 2.2 | 0.0473 | 2.0 | 0.91 | 297.7 | 5.9  | 299.1 | 5.8  | 309.5 | 21.3 | 297.7 | 5.9  |
| Upper White-Spot 176 | 798  | 22859  | 2.8 | 18.9183 | 1.0 | 0.3446 | 2.5 | 0.0473 | 2.2 | 0.91 | 297.8 | 6.5  | 300.7 | 6.4  | 322.8 | 23.6 | 297.8 | 6.5  |
| Upper White-Spot 184 | 1533 | 38487  | 3.1 | 19.0162 | 1.7 | 0.3428 | 3.9 | 0.0473 | 3.5 | 0.90 | 297.8 | 10.2 | 299.3 | 10.0 | 311.0 | 37.7 | 297.8 | 10.2 |
| Upper White-Spot 111 | 1774 | 39191  | 4.3 | 19.1313 | 0.8 | 0.3409 | 2.0 | 0.0473 | 1.9 | 0.92 | 297.9 | 5.5  | 297.8 | 5.3  | 297.2 | 18.5 | 297.9 | 5.5  |
| Upper White-Spot 201 | 1262 | 64910  | 3.3 | 18.6817 | 0.8 | 0.3491 | 1.8 | 0.0473 | 1.6 | 0.90 | 297.9 | 4.6  | 304.0 | 4.6  | 351.3 | 17.3 | 297.9 | 4.6  |
| Upper White-Spot 298 | 1261 | 4088   | 3.9 | 15.7274 | 1.1 | 0.4147 | 2.3 | 0.0473 | 2.0 | 0.88 | 298.0 | 5.9  | 352.3 | 6.8  | 727.8 | 22.7 | 298.0 | 5.9  |
| Upper White-Spot 78  | 1258 | 26390  | 3.9 | 18.5651 | 1.0 | 0.3513 | 2.6 | 0.0473 | 2.4 | 0.92 | 298.0 | 7.0  | 305.7 | 6.9  | 365.4 | 22.8 | 298.0 | 7.0  |
| Upper White-Spot 36  | 1014 | 46699  | 3.6 | 18.9634 | 0.8 | 0.3440 | 2.2 | 0.0473 | 2.0 | 0.93 | 298.0 | 5.9  | 300.2 | 5.7  | 317.3 | 18.5 | 298.0 | 5.9  |
| Upper White-Spot 149 | 1047 | 19552  | 2.8 | 17.7337 | 0.7 | 0.3678 | 2.2 | 0.0473 | 2.1 | 0.95 | 298.0 | 6.2  | 318.0 | 6.1  | 467.8 | 15.5 | 298.0 | 6.2  |
| Upper White-Spot 32  | 585  | 2838   | 2.9 | 15.3446 | 1.7 | 0.4252 | 2.5 | 0.0473 | 1.9 | 0.74 | 298.1 | 5.5  | 359.8 | 7.7  | 779.8 | 35.6 | 298.1 | 5.5  |
| Upper White-Spot 52  | 1343 | 49875  | 2.9 | 19.1890 | 0.6 | 0.3401 | 2.4 | 0.0473 | 2.3 | 0.96 | 298.1 | 6.7  | 297.2 | 6.1  | 290.4 | 14.8 | 298.1 | 6.7  |
| Upper White-Spot 60  | 857  | 22597  | 2.7 | 19.2431 | 0.9 | 0.3392 | 2.2 | 0.0473 | 2.0 | 0.91 | 298.2 | 5.8  | 296.6 | 5.7  | 283.9 | 21.5 | 298.2 | 5.8  |
| Upper White-Spot 25  | 498  | 8029   | 2.5 | 19.4711 | 1.2 | 0.3353 | 2.4 | 0.0474 | 2.0 | 0.85 | 298.3 | 5.8  | 293.6 | 6.0  | 257.0 | 28.3 | 298.3 | 5.8  |
| Upper White-Spot 70  | 563  | 203416 | 4.5 | 18.9571 | 1.3 | 0.3446 | 3.3 | 0.0474 | 3.1 | 0.92 | 298.4 | 8.9  | 300.6 | 8.7  | 318.1 | 29.7 | 298.4 | 8.9  |
| Upper White-Spot 80  | 640  | 70561  | 3.7 | 18.3963 | 1.0 | 0.3551 | 2.4 | 0.0474 | 2.2 | 0.92 | 298.4 | 6.6  | 308.6 | 6.5  | 385.9 | 21.6 | 298.4 | 6.6  |
| Upper White-Spot 280 | 647  | 17922  | 4.5 | 18.2243 | 1.6 | 0.3585 | 2.5 | 0.0474 | 2.0 | 0.78 | 298.4 | 5.7  | 311.1 | 6.7  | 407.0 | 35.2 | 298.4 | 5.7  |
| Upper White-Spot 202 | 570  | 6164   | 3.8 | 17.6703 | 1.1 | 0.3698 | 2.4 | 0.0474 | 2.1 | 0.89 | 298.5 | 6.1  | 319.5 | 6.5  | 475.7 | 24.0 | 298.5 | 6.1  |
| Upper White-Spot 108 | 1503 | 4588   | 4.3 | 16.2278 | 1.6 | 0.4027 | 2.7 | 0.0474 | 2.2 | 0.80 | 298.5 | 6.3  | 343.6 | 7.9  | 661.1 | 34.7 | 298.5 | 6.3  |
| Upper White-Spot 225 | 1321 | 127093 | 3.5 | 18.8759 | 0.7 | 0.3463 | 1.8 | 0.0474 | 1.7 | 0.92 | 298.6 | 4.9  | 301.9 | 4.8  | 327.8 | 16.7 | 298.6 | 4.9  |
| Upper White-Spot 211 | 561  | 5273   | 4.1 | 17.4108 | 1.2 | 0.3754 | 2.6 | 0.0474 | 2.3 | 0.89 | 298.6 | 6.6  | 323.6 | 7.1  | 508.3 | 25.5 | 298.6 | 6.6  |
| Upper White-Spot 9   | 469  | 5273   | 4.0 | 18.3742 | 2.0 | 0.3557 | 3.1 | 0.0474 | 2.4 | 0.76 | 298.6 | 6.9  | 309.0 | 8.3  | 388.6 | 45.3 | 298.6 | 6.9  |
| Upper White-Spot 228 | 902  | 9715   | 2.8 | 17.5857 | 0.8 | 0.3717 | 2.1 | 0.0474 | 1.9 | 0.93 | 298.6 | 5.7  | 320.9 | 5.7  | 486.3 | 17.0 | 298.6 | 5.7  |
| Upper White-Spot 200 | 1120 | 8534   | 2.6 | 17.6710 | 1.2 | 0.3701 | 2.4 | 0.0474 | 2.0 | 0.87 | 298.7 | 6.0  | 319.7 | 6.5  | 475.6 | 25.7 | 298.7 | 6.0  |
| Upper White-Spot 167 | 767  | 26368  | 2.3 | 19.2088 | 0.8 | 0.3405 | 2.2 | 0.0474 | 2.0 | 0.92 | 298.8 | 5.9  | 297.6 | 5.6  | 288.0 | 19.2 | 298.8 | 5.9  |
| Upper White-Spot 169 | 742  | 104915 | 1.9 | 19.3096 | 0.8 | 0.3388 | 2.0 | 0.0475 | 1.8 | 0.91 | 298.9 | 5.3  | 296.3 | 5.1  | 276.0 | 19.2 | 298.9 | 5.3  |
| Upper White-Spot 212 | 407  | 3286   | 1.4 | 14.0742 | 2.0 | 0.4649 | 3.2 | 0.0475 | 2.5 | 0.77 | 298.9 | 7.2  | 387.7 | 10.2 | 958.9 | 41.1 | 298.9 | 7.2  |
| Upper White-Spot 33  | 1060 | 22142  | 3.5 | 18.0108 | 0.9 | 0.3633 | 2.3 | 0.0475 | 2.1 | 0.92 | 298.9 | 6.3  | 314.7 | 6.3  | 433.3 | 20.1 | 298.9 | 6.3  |
| Upper White-Spot 185 | 950  | 117708 | 4.3 | 18.8786 | 0.7 | 0.3467 | 2.3 | 0.0475 | 2.2 | 0.95 | 299.0 | 6.4  | 302.2 | 6.0  | 327.5 | 16.4 | 299.0 | 6.4  |
| Upper White-Spot 59  | 711  | 18742  | 3.4 | 18.3322 | 0.9 | 0.3570 | 2.3 | 0.0475 | 2.1 | 0.92 | 299.0 | 6.3  | 310.0 | 6.3  | 393.8 | 20.9 | 299.0 | 6.3  |
| Upper White-Spot 79  | 542  | 38969  | 1.7 | 19.0812 | 1.3 | 0.3430 | 2.3 | 0.0475 | 2.0 | 0.84 | 299.0 | 5.8  | 299.5 | 6.1  | 303.2 | 28.9 | 299.0 | 5.8  |
| Upper White-Spot 216 | 643  | 6490   | 2.7 | 18.2959 | 1.2 | 0.3579 | 2.3 | 0.0475 | 1.9 | 0.85 | 299.1 | 5.6  | 310.6 | 6.0  | 398.2 | 26.5 | 299.1 | 5.6  |
| Upper White-Spot 177 | 1269 | 44202  | 4.2 | 19.0518 | 1.0 | 0.3437 | 2.6 | 0.0475 | 2.4 | 0.93 | 299.1 | 7.0  | 300.0 | 6.7  | 306.7 | 21.7 | 299.1 | 7.0  |
| Upper White-Spot 121 | 2134 | 21473  | 3.1 | 18.3992 | 0.8 | 0.3560 | 2.1 | 0.0475 | 1.9 | 0.93 | 299.2 | 5.6  | 309.2 | 5.5  | 385.6 | 17.2 | 299.2 | 5.6  |
| Upper White-Spot 113 | 525  | 15573  | 2.3 | 19.0162 | 1.2 | 0.3446 | 2.5 | 0.0475 | 2.2 |      |       |      |       |      |       |      |       |      |

|                      |      |         |      |         |     |        |     |        |     |      |       |      |       |      |        |      |       |      |
|----------------------|------|---------|------|---------|-----|--------|-----|--------|-----|------|-------|------|-------|------|--------|------|-------|------|
| Upper White-Spot 171 | 619  | 7787    | 2.3  | 17.4624 | 1.1 | 0.3763 | 2.6 | 0.0477 | 2.3 | 0.90 | 300.1 | 6.7  | 324.3 | 7.1  | 501.8  | 24.8 | 300.1 | 6.7  |
| Upper White-Spot 291 | 906  | 11383   | 3.8  | 17.8117 | 1.2 | 0.3691 | 2.6 | 0.0477 | 2.3 | 0.89 | 300.3 | 6.8  | 319.0 | 7.1  | 458.0  | 25.9 | 300.3 | 6.8  |
| Upper White-Spot 5   | 816  | 5727    | 2.9  | 17.2952 | 0.8 | 0.3802 | 2.5 | 0.0477 | 2.4 | 0.95 | 300.3 | 6.9  | 327.2 | 7.0  | 522.9  | 17.4 | 300.3 | 6.9  |
| Upper White-Spot 175 | 1435 | 34586   | 2.4  | 19.2758 | 0.9 | 0.3411 | 2.1 | 0.0477 | 1.9 | 0.91 | 300.3 | 5.5  | 298.0 | 5.4  | 280.1  | 19.7 | 300.3 | 5.5  |
| Upper White-Spot 56  | 1062 | 7282    | 2.7  | 16.8214 | 0.8 | 0.3909 | 2.0 | 0.0477 | 1.8 | 0.92 | 300.3 | 5.3  | 335.1 | 5.6  | 583.5  | 16.7 | 300.3 | 5.3  |
| Upper White-Spot 279 | 914  | 89375   | 3.3  | 19.0686 | 0.8 | 0.3449 | 2.1 | 0.0477 | 2.0 | 0.93 | 300.4 | 5.8  | 300.9 | 5.5  | 304.8  | 18.1 | 300.4 | 5.8  |
| Upper White-Spot 163 | 351  | 1954    | 4.0  | 13.2530 | 2.2 | 0.4966 | 3.2 | 0.0477 | 2.3 | 0.73 | 300.6 | 6.8  | 409.4 | 10.8 | 1080.7 | 44.0 | 300.6 | 6.8  |
| Upper White-Spot 195 | 277  | 57008   | 4.1  | 17.2640 | 1.5 | 0.3812 | 3.8 | 0.0477 | 3.5 | 0.92 | 300.6 | 10.3 | 328.0 | 10.6 | 526.9  | 32.8 | 300.6 | 10.3 |
| Upper White-Spot 252 | 460  | 6937    | 3.2  | 16.5466 | 2.3 | 0.3979 | 3.4 | 0.0477 | 2.6 | 0.75 | 300.7 | 7.6  | 340.1 | 9.9  | 619.2  | 48.8 | 300.7 | 7.6  |
| Upper White-Spot 196 | 2050 | 100349  | 4.2  | 19.1659 | 0.8 | 0.3435 | 2.3 | 0.0478 | 2.2 | 0.95 | 300.7 | 6.5  | 299.8 | 6.1  | 293.2  | 17.3 | 300.7 | 6.5  |
| Upper White-Spot 183 | 653  | 20694   | 4.2  | 18.4392 | 1.1 | 0.3571 | 2.4 | 0.0478 | 2.2 | 0.90 | 300.7 | 6.4  | 310.0 | 6.5  | 380.7  | 23.8 | 300.7 | 6.4  |
| Upper White-Spot 237 | 600  | 4609    | 2.5  | 16.1784 | 2.1 | 0.4070 | 3.1 | 0.0478 | 2.3 | 0.75 | 300.7 | 6.9  | 346.7 | 9.2  | 667.6  | 44.4 | 300.7 | 6.9  |
| Upper White-Spot 92  | 515  | 18474   | 4.0  | 17.9711 | 1.1 | 0.3665 | 2.3 | 0.0478 | 2.1 | 0.89 | 300.8 | 6.1  | 317.0 | 6.4  | 438.2  | 23.4 | 300.8 | 6.1  |
| Upper White-Spot 10  | 1043 | 4778    | 2.4  | 15.7412 | 1.5 | 0.4184 | 2.4 | 0.0478 | 1.9 | 0.79 | 300.8 | 5.6  | 354.9 | 7.2  | 725.9  | 31.5 | 300.8 | 5.6  |
| Upper White-Spot 257 | 1584 | 1578590 | 3.6  | 18.7432 | 0.9 | 0.3516 | 2.0 | 0.0478 | 1.8 | 0.90 | 301.0 | 5.3  | 305.9 | 5.3  | 343.8  | 19.9 | 301.0 | 5.3  |
| Upper White-Spot 187 | 821  | 44751   | 3.3  | 19.1119 | 0.8 | 0.3448 | 2.3 | 0.0478 | 2.1 | 0.93 | 301.0 | 6.1  | 300.8 | 5.9  | 299.5  | 19.0 | 301.0 | 6.1  |
| Upper White-Spot 38  | 518  | 97034   | 2.4  | 18.4158 | 1.0 | 0.3583 | 3.2 | 0.0479 | 3.1 | 0.95 | 301.3 | 9.0  | 310.9 | 8.6  | 383.5  | 23.2 | 301.3 | 9.0  |
| Upper White-Spot 269 | 553  | 27311   | 3.0  | 19.4224 | 1.1 | 0.3398 | 2.4 | 0.0479 | 2.1 | 0.89 | 301.4 | 6.2  | 297.0 | 6.1  | 262.7  | 24.6 | 301.4 | 6.2  |
| Upper White-Spot 28  | 641  | 7803    | 4.0  | 16.5469 | 1.9 | 0.3990 | 3.0 | 0.0479 | 2.4 | 0.78 | 301.5 | 7.0  | 340.9 | 8.7  | 619.1  | 40.5 | 301.5 | 7.0  |
| Upper White-Spot 96  | 1930 | 4073    | 4.3  | 15.6564 | 1.0 | 0.4217 | 1.8 | 0.0479 | 1.5 | 0.85 | 301.5 | 4.6  | 357.2 | 5.5  | 737.4  | 20.7 | 301.5 | 4.6  |
| Upper White-Spot 230 | 450  | 4197    | 3.5  | 16.1617 | 1.7 | 0.4085 | 2.8 | 0.0479 | 2.3 | 0.81 | 301.5 | 6.7  | 347.8 | 8.3  | 669.8  | 35.8 | 301.5 | 6.7  |
| Upper White-Spot 285 | 466  | 15744   | 3.5  | 19.4437 | 1.1 | 0.3396 | 2.6 | 0.0479 | 2.4 | 0.91 | 301.6 | 7.0  | 296.9 | 6.7  | 260.2  | 24.2 | 301.6 | 7.0  |
| Upper White-Spot 99  | 860  | 92305   | 2.1  | 19.1514 | 0.8 | 0.3449 | 2.0 | 0.0479 | 1.9 | 0.92 | 301.6 | 5.5  | 300.8 | 5.3  | 294.8  | 18.2 | 301.6 | 5.5  |
| Upper White-Spot 47  | 781  | 178519  | 4.0  | 18.8144 | 0.9 | 0.3511 | 2.5 | 0.0479 | 2.4 | 0.94 | 301.6 | 7.0  | 305.5 | 6.7  | 335.3  | 20.2 | 301.6 | 7.0  |
| Upper White-Spot 312 | 1444 | 12055   | 5.3  | 18.4754 | 1.1 | 0.3577 | 2.1 | 0.0479 | 1.8 | 0.85 | 301.8 | 5.2  | 310.5 | 5.6  | 376.3  | 24.8 | 301.8 | 5.2  |
| Upper White-Spot 31  | 815  | 5244    | 2.6  | 17.1484 | 1.4 | 0.3855 | 2.8 | 0.0479 | 2.4 | 0.86 | 301.9 | 7.1  | 331.1 | 7.8  | 541.6  | 30.6 | 301.9 | 7.1  |
| Upper White-Spot 157 | 528  | 65530   | 3.3  | 17.6857 | 1.2 | 0.3738 | 2.4 | 0.0480 | 2.1 | 0.87 | 301.9 | 6.2  | 322.5 | 6.6  | 473.7  | 25.9 | 301.9 | 6.2  |
| Upper White-Spot 20  | 918  | 30637   | 3.3  | 17.2882 | 1.8 | 0.3824 | 2.9 | 0.0480 | 2.4 | 0.80 | 301.9 | 7.0  | 328.8 | 8.3  | 523.8  | 38.4 | 301.9 | 7.0  |
| Upper White-Spot 290 | 1612 | 146431  | 3.2  | 18.9225 | 0.7 | 0.3495 | 1.7 | 0.0480 | 1.6 | 0.92 | 302.1 | 4.7  | 304.4 | 4.6  | 322.3  | 15.5 | 302.1 | 4.7  |
| Upper White-Spot 44  | 2788 | 38254   | 2.2  | 18.8558 | 0.6 | 0.3510 | 1.9 | 0.0480 | 1.8 | 0.96 | 302.2 | 5.4  | 305.5 | 5.1  | 330.2  | 12.7 | 302.2 | 5.4  |
| Upper White-Spot 139 | 985  | 13133   | 2.8  | 17.6231 | 0.9 | 0.3759 | 2.3 | 0.0480 | 2.1 | 0.91 | 302.5 | 6.2  | 324.0 | 6.3  | 481.6  | 20.3 | 302.5 | 6.2  |
| Upper White-Spot 150 | 923  | 72722   | 4.2  | 18.9989 | 1.1 | 0.3490 | 2.7 | 0.0481 | 2.4 | 0.91 | 302.8 | 7.2  | 304.0 | 7.0  | 313.1  | 25.0 | 302.8 | 7.2  |
| Upper White-Spot 74  | 775  | 12506   | 3.3  | 19.3733 | 1.0 | 0.3423 | 2.6 | 0.0481 | 2.4 | 0.93 | 302.8 | 7.1  | 298.9 | 6.7  | 268.5  | 22.2 | 302.8 | 7.1  |
| Upper White-Spot 119 | 500  | 10573   | 4.3  | 19.0857 | 1.1 | 0.3476 | 2.4 | 0.0481 | 2.1 | 0.88 | 303.0 | 6.2  | 302.9 | 6.2  | 302.7  | 25.5 | 303.0 | 6.2  |
| Upper White-Spot 224 | 335  | 6994    | 1.3  | 15.9311 | 1.3 | 0.4168 | 2.6 | 0.0482 | 2.3 | 0.88 | 303.2 | 6.8  | 353.7 | 7.8  | 700.4  | 26.8 | 303.2 | 6.8  |
| Upper White-Spot 105 | 1570 | 81209   | 4.3  | 18.1575 | 0.9 | 0.3657 | 2.4 | 0.0482 | 2.2 | 0.93 | 303.2 | 6.7  | 316.4 | 6.6  | 415.2  | 19.4 | 303.2 | 6.7  |
| Upper White-Spot 296 | 949  | 853111  | 2.1  | 18.8535 | 0.9 | 0.3523 | 2.5 | 0.0482 | 2.3 | 0.94 | 303.3 | 6.8  | 306.4 | 6.5  | 330.5  | 19.5 | 303.3 | 6.8  |
| Upper White-Spot 301 | 364  | 2201    | 2.7  | 15.0117 | 1.8 | 0.4425 | 2.7 | 0.0482 | 2.0 | 0.75 | 303.3 | 6.0  | 372.0 | 8.3  | 825.8  | 36.7 | 303.3 | 6.0  |
| Upper White-Spot 133 | 990  | 35517   | 3.5  | 19.0912 | 0.9 | 0.3480 | 2.6 | 0.0482 | 2.4 | 0.94 | 303.3 | 7.1  | 303.2 | 6.7  | 302.1  | 19.7 | 303.3 | 7.1  |
| Upper White-Spot 213 | 942  | 739288  | 3.0  | 19.0521 | 1.0 | 0.3487 | 2.5 | 0.0482 | 2.3 | 0.91 | 303.4 | 6.8  | 303.8 | 6.6  | 306.7  | 23.2 | 303.4 | 6.8  |
| Upper White-Spot 26  | 847  | 10734   | 3.8  | 17.0192 | 1.0 | 0.3904 | 1.7 | 0.0482 | 1.4 | 0.83 | 303.4 | 4.3  | 334.7 | 5.0  | 558.1  | 21.4 | 303.4 | 4.3  |
| Upper White-Spot 194 | 732  | 73377   | 4.2  | 18.9717 | 0.9 | 0.3503 | 2.2 | 0.0482 | 2.0 | 0.92 | 303.5 | 6.1  | 305.0 | 5.9  | 316.3  | 20.2 | 303.5 | 6.1  |
| Upper White-Spot 152 | 386  | 15023   | 3.0  | 17.5661 | 1.0 | 0.3784 | 2.2 | 0.0482 | 2.0 | 0.89 | 303.5 | 5.9  | 325.9 | 6.2  | 488.7  | 22.7 | 303.5 | 5.9  |
| Upper White-Spot 101 | 818  | 74706   | 3.4  | 19.0469 | 1.1 | 0.3490 | 2.8 | 0.0482 | 2.6 | 0.92 | 303.6 | 7.6  | 304.0 | 7.4  | 307.3  | 25.8 | 303.6 | 7.6  |
| Upper White-Spot 109 | 1284 | 9719    | 2.8  | 17.4505 | 0.8 | 0.3811 | 2.1 | 0.0482 | 1.9 | 0.92 | 303.6 | 5.7  | 327.8 | 5.9  | 503.3  | 18.3 | 303.6 | 5.7  |
| Upper White-Spot 268 | 720  | 5335    | 2.7  | 15.8382 | 0.9 | 0.4201 | 2.4 | 0.0483 | 2.2 | 0.93 | 303.8 | 6.5  | 356.1 | 7.1  | 712.9  | 18.4 | 303.8 | 6.5  |
| Upper White-Spot 205 | 1405 | 7926    | 1.6  | 17.6676 | 1.0 | 0.3766 | 1.8 | 0.0483 | 1.5 | 0.83 | 303.8 | 4.5  | 324.5 | 5.1  | 476.0  | 22.6 | 303.8 | 4.5  |
| Upper White-Spot 197 | 1544 | 245358  | 13.1 | 19.0399 | 0.7 | 0.3495 | 2.5 | 0.0483 | 2.4 | 0.96 | 303.8 | 7.1  | 304.3 | 6.6  | 308.1  | 16.8 | 303.8 | 7.1  |
| Upper White-Spot 50  | 642  | 4720    | 4.2  | 16.5038 | 1.6 | 0.4032 | 2.6 | 0.0483 | 2.0 | 0.79 | 303.9 | 6.0  | 344.0 | 7.5  | 624.8  | 34.4 | 303.9 | 6.0  |
| Upper White-Spot 23  | 729  | 8052    | 2.8  | 19.3615 | 1.2 | 0.3439 | 2.2 | 0.0483 | 1.8 | 0.83 | 304.1 | 5.4  | 300.2 | 5.7  | 269.9  | 27.7 | 304.1 | 5.4  |
| Upper White-Spot 16  | 2048 | 37695   | 2.7  | 18.5784 | 0.6 | 0.3585 | 1.5 | 0.0483 | 1.3 | 0.90 | 304.1 | 4.0  | 311.1 | 4.0  | 363.8  | 14.6 | 304.1 | 4.0  |
| Upper White-Spot 165 | 1704 | 31372   | 3.2  | 18.7644 | 0.5 | 0.3550 | 1.7 | 0.0483 | 1.6 | 0.95 | 304.2 | 4.8  | 308.5 | 4.5  | 341.3  | 12.4 | 304.2 | 4.8  |
| Upper White-Spot 40  | 1200 | 18633   | 3.9  | 18.3315 | 0.8 | 0.3634 | 1.8 | 0.0483 | 1.6 | 0.90 | 304.2 | 4.8  | 314.8 | 4.9  | 393.8  | 17.6 | 304.2 | 4.8  |
| Upper White-Spot 18  | 909  | 13153   | 3.2  | 17.1873 | 1.1 | 0.3876 | 2.5 | 0.0483 | 2.2 | 0.88 | 304.2 | 6.4  | 332.6 | 7.0  | 536.6  | 25.0 | 304.2 | 6.4  |
| Upper White-Spot 131 | 1113 | 47277   | 3.8  | 19.1814 | 0.8 | 0.3475 | 1.9 | 0.0483 | 1.7 | 0.91 | 304.3 | 5.1  | 302.8 | 4.9  | 291.3  | 17.9 | 304.3 | 5.1  |
| Upper White-Spot 114 | 415  | 3991    | 2.5  | 14.9347 | 1.5 | 0.4463 | 2.9 | 0.0483 | 2.4 | 0.85 | 304.4 | 7.3  | 374.7 | 9.0  | 836.5  | 32.1 | 304.4 | 7.3  |
| Upper White-Spot 34  | 584  | 2441    | 2.9  | 13.2996 | 1.4 | 0.5012 | 2.9 | 0.0483 | 2.5 | 0.87 | 304.4 | 7.6  | 412.5 | 9.9  | 1073.6 | 28.4 | 304.4 | 7.6  |
| Upper White-Spot 286 | 403  | 3990    | 3.6  | 15.5277 | 1.8 | 0.4293 | 2.6 | 0.0484 | 2.0 | 0.74 | 304.4 | 5.8  | 362.7 | 8.0  | 754.8  | 37.3 | 304.4 | 5.8  |
| Upper White-Spot 275 | 654  | 13392   | 3.2  | 18.4338 | 1.0 | 0.3617 | 2.2 | 0.0484 | 1.9 | 0.89 | 304.4 | 5.8  | 313.5 | 5.9  | 381.3  | 21.9 | 304.4 | 5.8  |
| Upper White-Spot 307 | 534  | 5919    | 3.2  | 17.5863 | 1.3 | 0.3792 | 2.6 | 0.0484 | 2.2 | 0.86 | 304.5 | 6.6  | 326.4 | 7.2  | 486.2  | 29.4 | 304.5 | 6.6  |
| Upper White-Spot 219 | 1047 | 3323    | 2.9  | 14.6008 | 2.3 | 0.4568 | 3.1 | 0.0484 | 2.0 | 0.66 | 304.5 | 6.0  | 382.0 | 9.7  | 883.4  | 47.7 | 304.5 | 6.0  |
| Upper White-Spot 61  | 1207 | 425061  | 2.9  | 18.9131 | 0.8 | 0.3528 | 2.6 | 0.0484 | 2.4 | 0.95 | 304.7 | 7.3  | 306.8 | 6.8  | 323.4  | 18.1 | 304.7 | 7.3  |
| Upper White-Spot 117 | 264  | 8475    | 2.6  | 19.5347 | 1.8 | 0.3416 | 3.1 | 0.0484 | 2.5 | 0.82 | 304.7 | 7.5  | 298.4 | 8.0  | 249.4  | 41.1 | 304.7 | 7.5  |
| Upper White-Spot 287 | 1328 | 35271   | 4.1  | 18.4441 | 0.7 | 0.3621 | 2.0 | 0.0484 | 1.8 | 0.94 | 304.9 | 5.5  | 313.8 | 5.3  | 380.1  | 14.9 | 304.9 | 5.5  |
| Upper White-Spot 249 | 806  | 61638   | 2.9  | 18.6816 | 0.9 | 0.3575 | 2.8 | 0.0484 | 2.6 | 0.95 | 304.9 | 7.8  | 310.4 | 7.4  | 351.3  | 19.6 | 304.9 | 7.8  |
| Upper White-Spot 229 | 615  | 8273    | 3.9  | 18.3878 | 1.0 | 0.3633 | 2.5 | 0.0484 | 2.3 | 0.91 | 305.0 | 6.8  | 314.7 | 6.8  | 387.0  | 23.4 | 305.0 | 6.8  |
| Upper White-Spot 242 | 459  | 27033   | 4.1  | 19.0965 | 1.2 | 0.3502 | 2.8 | 0.0485 | 2.5 | 0.90 | 305.3 | 7.4  | 304.9 | 7.3  | 301.4  | 27.1 | 305.3 | 7.4  |
| Upper White-Spot 314 | 630  | 19321   | 3.0  | 19.0778 | 0.8 | 0.3508 | 2.2 | 0.0485 | 2.0 | 0.93 |       |      |       |      |        |      |       |      |

|                      |      |        |     |         |     |        |     |        |     |      |       |      |       |      |        |       |       |      |
|----------------------|------|--------|-----|---------|-----|--------|-----|--------|-----|------|-------|------|-------|------|--------|-------|-------|------|
| Upper White-Spot 173 | 761  | 18539  | 2.8 | 19.2279 | 0.7 | 0.3493 | 2.3 | 0.0487 | 2.2 | 0.95 | 306.6 | 6.6  | 304.2 | 6.1  | 285.7  | 16.2  | 306.6 | 6.6  |
| Upper White-Spot 208 | 595  | 39235  | 2.4 | 18.8787 | 0.9 | 0.3560 | 2.8 | 0.0487 | 2.7 | 0.95 | 306.8 | 8.0  | 309.2 | 7.5  | 327.5  | 19.8  | 306.8 | 8.0  |
| Upper White-Spot 94  | 728  | 535306 | 2.9 | 19.1086 | 1.2 | 0.3523 | 2.6 | 0.0488 | 2.3 | 0.88 | 307.3 | 6.8  | 306.4 | 6.8  | 299.9  | 27.5  | 307.3 | 6.8  |
| Upper White-Spot 248 | 1141 | 9780   | 2.3 | 17.6461 | 1.2 | 0.3816 | 2.3 | 0.0488 | 2.0 | 0.86 | 307.4 | 6.0  | 328.2 | 6.5  | 478.7  | 26.2  | 307.4 | 6.0  |
| Upper White-Spot 162 | 556  | 127644 | 5.4 | 18.2659 | 1.5 | 0.3688 | 2.7 | 0.0489 | 2.3 | 0.84 | 307.5 | 6.9  | 318.8 | 7.5  | 401.9  | 33.6  | 307.5 | 6.9  |
| Upper White-Spot 67  | 710  | 6901   | 2.6 | 17.8953 | 1.0 | 0.3775 | 2.8 | 0.0490 | 2.6 | 0.93 | 308.3 | 7.8  | 325.2 | 7.7  | 447.6  | 23.2  | 308.3 | 7.8  |
| Upper White-Spot 97  | 2203 | 15608  | 2.3 | 17.6998 | 0.8 | 0.3817 | 2.1 | 0.0490 | 1.9 | 0.92 | 308.4 | 5.8  | 328.3 | 5.9  | 472.0  | 18.3  | 308.4 | 5.8  |
| Upper White-Spot 148 | 1592 | 18015  | 2.3 | 17.4053 | 0.7 | 0.3883 | 1.7 | 0.0490 | 1.6 | 0.91 | 308.5 | 4.8  | 333.1 | 4.9  | 509.0  | 15.9  | 308.5 | 4.8  |
| Upper White-Spot 154 | 687  | 3171   | 2.5 | 14.2429 | 1.3 | 0.4746 | 2.3 | 0.0490 | 1.9 | 0.83 | 308.5 | 5.7  | 394.3 | 7.5  | 934.5  | 26.6  | 308.5 | 5.7  |
| Upper White-Spot 147 | 282  | 36507  | 3.7 | 19.0496 | 1.3 | 0.3550 | 2.8 | 0.0491 | 2.5 | 0.89 | 308.7 | 7.5  | 308.5 | 7.4  | 307.0  | 28.8  | 308.7 | 7.5  |
| Upper White-Spot 53  | 734  | 12194  | 3.1 | 18.3429 | 0.9 | 0.3688 | 2.3 | 0.0491 | 2.1 | 0.92 | 308.8 | 6.3  | 318.8 | 6.2  | 392.4  | 20.2  | 308.8 | 6.3  |
| Upper White-Spot 215 | 671  | 11800  | 4.6 | 18.3053 | 0.9 | 0.3704 | 2.9 | 0.0492 | 2.7 | 0.95 | 309.4 | 8.3  | 319.9 | 7.9  | 397.0  | 20.4  | 309.4 | 8.3  |
| Upper White-Spot 55  | 391  | 19693  | 3.7 | 18.5445 | 1.1 | 0.3657 | 2.5 | 0.0492 | 2.2 | 0.90 | 309.5 | 6.7  | 316.5 | 6.7  | 367.9  | 24.1  | 309.5 | 6.7  |
| Upper White-Spot 295 | 561  | 3491   | 5.0 | 14.8131 | 1.1 | 0.4580 | 2.4 | 0.0492 | 2.1 | 0.88 | 309.6 | 6.4  | 382.9 | 7.6  | 853.5  | 23.3  | 309.6 | 6.4  |
| Upper White-Spot 243 | 292  | 89330  | 1.2 | 15.5654 | 1.1 | 0.4361 | 2.9 | 0.0492 | 2.6 | 0.92 | 309.8 | 8.0  | 367.5 | 8.8  | 749.7  | 24.1  | 309.8 | 8.0  |
| Upper White-Spot 179 | 1143 | 17862  | 4.3 | 18.0108 | 0.8 | 0.3769 | 2.0 | 0.0492 | 1.8 | 0.91 | 309.9 | 5.4  | 324.8 | 5.5  | 433.3  | 18.5  | 309.9 | 5.4  |
| Upper White-Spot 260 | 718  | 3563   | 2.9 | 14.8766 | 1.4 | 0.4565 | 2.6 | 0.0493 | 2.2 | 0.85 | 309.9 | 6.6  | 381.8 | 8.2  | 844.6  | 28.2  | 309.9 | 6.6  |
| Upper White-Spot 223 | 421  | 2437   | 1.2 | 15.7923 | 3.2 | 0.4308 | 4.1 | 0.0493 | 2.5 | 0.62 | 310.5 | 7.6  | 363.8 | 12.4 | 719.0  | 67.8  | 310.5 | 7.6  |
| Upper White-Spot 132 | 862  | 107065 | 2.3 | 18.3187 | 0.8 | 0.3715 | 2.0 | 0.0494 | 1.8 | 0.91 | 310.5 | 5.4  | 320.7 | 5.4  | 395.4  | 18.6  | 310.5 | 5.4  |
| Upper White-Spot 158 | 598  | 3439   | 1.5 | 15.6338 | 1.5 | 0.4357 | 3.3 | 0.0494 | 2.9 | 0.89 | 310.8 | 8.8  | 367.2 | 10.1 | 740.4  | 31.7  | 310.8 | 8.8  |
| Upper White-Spot 35  | 571  | 4988   | 3.9 | 16.5180 | 1.4 | 0.4135 | 2.8 | 0.0495 | 2.4 | 0.87 | 311.7 | 7.3  | 351.4 | 8.3  | 622.9  | 30.1  | 311.7 | 7.3  |
| Upper White-Spot 58  | 600  | 19870  | 2.9 | 19.2103 | 1.2 | 0.3557 | 2.7 | 0.0496 | 2.4 | 0.90 | 311.8 | 7.4  | 309.0 | 7.2  | 287.9  | 27.0  | 311.8 | 7.4  |
| Upper White-Spot 234 | 1097 | 1948   | 2.9 | 12.9656 | 2.4 | 0.5277 | 2.8 | 0.0496 | 1.5 | 0.51 | 312.2 | 4.4  | 430.3 | 10.0 | 1124.5 | 48.6  | 312.2 | 4.4  |
| Upper White-Spot 282 | 1046 | 8672   | 2.4 | 17.2557 | 0.8 | 0.3968 | 2.1 | 0.0497 | 1.9 | 0.92 | 312.4 | 5.8  | 339.3 | 6.0  | 528.0  | 17.7  | 312.4 | 5.8  |
| Upper White-Spot 302 | 996  | 3964   | 1.7 | 16.2156 | 1.3 | 0.4241 | 2.1 | 0.0499 | 1.6 | 0.78 | 313.8 | 4.9  | 359.0 | 6.2  | 662.6  | 27.7  | 313.8 | 4.9  |
| Upper White-Spot 19  | 268  | 2551   | 2.9 | 13.9900 | 3.3 | 0.4940 | 4.1 | 0.0501 | 2.4 | 0.58 | 315.3 | 7.2  | 407.6 | 13.7 | 971.1  | 68.0  | 315.3 | 7.2  |
| Upper White-Spot 180 | 235  | 6144   | 1.4 | 19.1552 | 1.5 | 0.3620 | 2.8 | 0.0503 | 2.4 | 0.85 | 316.3 | 7.4  | 313.7 | 7.6  | 294.4  | 33.4  | 316.3 | 7.4  |
| Upper White-Spot 100 | 702  | 4047   | 2.9 | 15.7232 | 1.2 | 0.4436 | 2.6 | 0.0506 | 2.3 | 0.89 | 318.1 | 7.3  | 372.8 | 8.2  | 728.4  | 25.1  | 318.1 | 7.3  |
| Upper White-Spot 284 | 209  | 6962   | 2.2 | 17.1819 | 2.5 | 0.4091 | 3.9 | 0.0510 | 2.9 | 0.76 | 320.5 | 9.2  | 348.2 | 11.5 | 537.3  | 55.7  | 320.5 | 9.2  |
| Upper White-Spot 304 | 336  | 718    | 3.5 | 7.8796  | 4.4 | 0.9247 | 5.5 | 0.0528 | 3.4 | 0.61 | 332.0 | 10.9 | 664.8 | 27.0 | 2055.6 | 77.7  | 332.0 | 10.9 |
| Upper White-Spot 272 | 254  | 5014   | 1.8 | 19.5231 | 1.4 | 0.3750 | 3.3 | 0.0531 | 3.0 | 0.90 | 333.5 | 9.8  | 323.4 | 9.2  | 250.8  | 32.8  | 333.5 | 9.8  |
| Upper White-Spot 266 | 158  | 4469   | 4.6 | 17.4354 | 1.3 | 0.4275 | 3.3 | 0.0541 | 3.0 | 0.91 | 339.4 | 9.8  | 361.4 | 9.9  | 505.2  | 29.1  | 339.4 | 9.8  |
| Upper White-Spot 310 | 137  | 4704   | 3.7 | 16.6194 | 2.4 | 0.4608 | 4.0 | 0.0555 | 3.3 | 0.81 | 348.5 | 11.0 | 384.8 | 12.9 | 609.7  | 51.0  | 348.5 | 11.0 |
| Upper White-Spot 308 | 379  | 1464   | 2.9 | 10.6358 | 5.7 | 0.7250 | 6.6 | 0.0559 | 3.4 | 0.51 | 350.8 | 11.5 | 553.6 | 28.1 | 1508.5 | 107.0 | 350.8 | 11.5 |
| Upper White-Spot 14  | 98   | 2526   | 3.9 | 13.9617 | 4.2 | 0.5932 | 5.6 | 0.0601 | 3.7 | 0.66 | 376.0 | 13.5 | 472.9 | 21.3 | 975.3  | 86.5  | 376.0 | 13.5 |

**Notes:**

Parsed grains less than -2 Ma

Parsed grains between -2 Ma and zero not within one sigma of zero

50% error filter applied to ages between 2 Ma and 5 Ma

20% error filter applied to >5 Ma ages

Did not parse grains 1 Ma to zero
