# Supplementary material
Source: publisher figshare collection journal article supplement (https://gsapubs.figshare.com/articles/dataset/_/15167367)
Supplement: Supplementary file 7 [file 1]

**Supplemental Item S3 - Modern river sediment sample location  
information, Wrangell Arc, Wrangell-St. Elias Mountains, Alaska-Canada**

|                    | <b>Latitude</b> | <b>Longitude</b> |
|--------------------|-----------------|------------------|
| <b>Rivers</b>      |                 |                  |
| Boulder            | N62°31'42.50"   | W144°21'54.10"   |
| Chetaslina         | N62°45'02.66"   | W144°41'01.92"   |
| Chisana            | N62°11'25.09"   | W142°05'45.75"   |
| Chitistone         | N61°27'35.26"   | W142°28'26.69"   |
| Copper             | N62°34'06.10"   | W143°41'48.80"   |
| Dadina             | N62°54'23.49"   | W144°40'12.44"   |
| Donjek             | N61°40'46.14"   | W139°45'02.09"   |
| Drop               | N62°32'14.00"   | W143°47'31.70"   |
| Duke River         | N61°22'32.54"   | W139° 8' 40.41"  |
| Hawkins            | N61°08'36.73"   | W142°03'10.52"   |
| Kennicott          | N61°26'02.36"   | W142°56'26.90"   |
| Kotsina            | N61°42'58.03"   | W144°16'52.77"   |
| Kuskalana          | N61°36'42.48"   | W143°42'29.72"   |
| Lower White        | N61°59'15.80"   | W140° 33' 29.03" |
| Nabesna            | N62°25'22.27"   | W142°47'46.93"   |
| Nadina (east)      | N61°58'35.97"   | W144°44'48.67"   |
| Nadina (west)      | N62°00'27.24"   | W144°32'33.60"   |
| Nizina             | N61°29'30.03"   | W142°34'32.95"   |
| Ptarmagin          | N61°54'48.99"   | W141°04'15.21"   |
| Sanford            | N62°11'06.16"   | W144°29'54.45"   |
| Upper White        | N61°43'37.94"   | W141°17'15.88"   |
| Willow             | N62°00'18.61"   | W141°44'30.73"   |
| <b>Tributaries</b> |                 |                  |
| Bond               | N62°16'26.10"   | W142°51'00.00"   |
| Cross              | N62°07'56.29"   | W142°18'11.36"   |
| Francis            | N61°52'16.47"   | W141°09'21.22"   |
| Jacksina           | N62°21'36.70"   | W142°57'13.10"   |
| Lime               | N62°45'25.60"   | W141°49'56.50"   |
| Monte Cristo       | N62°13'26.97"   | W142°55'30.73"   |
| Rock Lake          | N61°48'25.60"   | W141°18'43.39"   |
| Rocker             | N62°54'46.08"   | W141°03'43.22"   |

Note - WGS84 datum for all coordinates
