# Supplementary material
Source: publisher figshare collection journal article supplement (https://gsapubs.figshare.com/articles/dataset/_/15167367)
Supplement: Supplementary file 8 [file 1]

Archive with 13 entries (13 files):
- GS2471_SuppItemS1.pdf
- GS2471_SuppItemS2.pdf
- GS2471_SuppItemS3.pdf
- GS2471_SuppItemS4.pdf
- GS2471_SuppItemS5.pdf
- GS2471_SuppItemS6.pdf
- GS2471_SuppItemS7.pdf
- GS2471_SuppItemS8.pdf
- GS2471_SuppItemS9.pdf
- GS2471_SuppItemS10.pdf
- GS2471_SuppItemS11.pdf
- GS2471_SuppItemS12.pdf
- GS2471_SuppItemS13.pdf
