# Supplementary material
Source: publisher figshare collection journal article supplement (https://gsapubs.figshare.com/articles/dataset/_/15167367)
Supplement: Supplementary file 8 [file 1 › GS2471_SuppItemS5.pdf]

Supplemental Item S5 - Summary of surface area of ice, surficial deposits, and bedrock within sampled watersheds, Wrangell Arc, Wrangell-St. Elias Mountains, Alaska-Canada

|              | area (km <sup>2</sup> ) |       |       |      |      |      |      |      |      |      |      |      |       | % of watershed |       |      |      |      |     |      |      |     |      |      |      |  |
|--------------|-------------------------|-------|-------|------|------|------|------|------|------|------|------|------|-------|----------------|-------|------|------|------|-----|------|------|-----|------|------|------|--|
| Catchment    | Ice                     | Water | Qs    | QTV  | Tp   | Oa   | JKs  | Kvi  | Ji   | JTr  | Pp   | Pz   | Total | Ice            | Water | Qs   | QTV  | Tp   | Oa  | JKs  | Kvi  | Ji  | JTr  | Pp   | Pz   |  |
| Northeastern |                         |       |       |      |      |      |      |      |      |      |      |      |       |                |       |      |      |      |     |      |      |     |      |      |      |  |
| Francis      | 0.0                     | 0.0   | 38.3  | 56.7 | 0.0  | 0.0  | 0.0  | 0.0  | 0.0  | 0.3  | 0.1  | 0.0  | 95.3  | 0.0            | 0.0   | 40.3 | 59.7 | 0.0  | 0.0 | 0.0  | 0.0  | 0.0 | 0.3  | 0.1  | 0.0  |  |
| Rocker       | 0.0                     | 0.0   | 4.7   | 8.5  | 0.0  | 0.0  | 0.0  | 0.0  | 0.0  | 0.0  | 0.0  | 0.0  | 13.2  | 0.0            | 0.3   | 35.9 | 65.0 | 0.0  | 0.0 | 0.0  | 0.0  | 0.0 | 0.0  | 0.0  | 0.0  |  |
| Ptarmagin    | 0.0                     | 14.1  | 166   | 148  | 11.2 | 0.0  | 1.6  | 0.0  | 0.0  | 0.5  | 0.8  | 0.0  | 343   | 0.0            | 4.1   | 48.6 | 43.3 | 3.3  | 0.0 | 0.5  | 0.0  | 0.0 | 0.1  | 0.2  | 0.0  |  |
| Willow       | 0.0                     | 0.1   | 9.2   | 3.7  | 0.0  | 0.0  | 0.0  | 10.7 | 0.0  | 0.0  | 0.0  | 0.0  | 23.7  | 0.0            | 0.4   | 38.5 | 15.4 | 0.0  | 0.0 | 0.0  | 44.4 | 0.0 | 0.0  | 0.0  | 0.0  |  |
| Cross        | 55.8                    | 0.0   | 50.0  | 9.6  | 22.5 | 0.0  | 0.0  | 0.0  | 0.0  | 14.7 | 60.2 | 0.0  | 213   | 26.2           | 0.0   | 23.5 | 4.5  | 10.6 | 0.0 | 0.0  | 0.0  | 0.0 | 6.9  | 28.3 | 0.0  |  |
| Chisana      | 496                     | 19.5  | 781   | 109  | 39.0 | 0.0  | 439  | 119  | 0.0  | 120  | 69.5 | 0.0  | 2193  | 22.6           | 0.9   | 35.6 | 5.0  | 1.8  | 0.0 | 20.0 | 5.4  | 0.0 | 5.5  | 3.2  | 0.0  |  |
| Total        | 552                     | 33.8  | 1050  | 336  | 72.7 | 0.0  | 441  | 130  | 0.0  | 136  | 131  | 0.0  | 2880  | 19.1           | 1.2   | 36.4 | 11.7 | 2.5  | 0.0 | 15.3 | 4.5  | 0.0 | 4.7  | 4.5  | 0.0  |  |
| Eastern      |                         |       |       |      |      |      |      |      |      |      |      |      |       |                |       |      |      |      |     |      |      |     |      |      |      |  |
| Duke         | 66.9                    | 0.0   | 374   | 44.4 | 7.5  | 0.9  | 0.0  | 0.0  | 0.0  | 3.4  | 12.5 | 158  | 668   | 10.1           | 0.0   | 56.5 | 6.7  | 1.1  | 0.1 | 0.0  | 0.0  | 0.0 | 0.5  | 1.9  | 23.9 |  |
| Donjek       | 1545                    | 0.0   | 1394  | 192  | 25.2 | 4.3  | 0.0  | 10.2 | 59.5 | 41.0 | 196  | 968  | 4435  | 34.9           | 0.0   | 31.5 | 4.3  | 0.6  | 0.1 | 0.0  | 0.2  | 1.3 | 0.9  | 4.4  | 21.9 |  |
| Lime         | 1.5                     | 0.0   | 18.1  | 9.7  | 0.9  | 0.0  | 0.0  | 0.0  | 0.0  | 7.7  | 43.5 | 0.0  | 81.3  | 1.8            | 0.0   | 22.3 | 12.0 | 1.1  | 0.0 | 0.0  | 0.0  | 0.0 | 9.5  | 53.7 | 0.0  |  |
| Upper White  | 442                     | 12.0  | 728   | 351  | 25.4 | 0.0  | 0.0  | 23.1 | 0.0  | 105  | 152  | 0.0  | 1838  | 24.1           | 0.7   | 39.6 | 19.1 | 1.4  | 0.0 | 0.0  | 1.3  | 0.0 | 5.7  | 8.3  | 0.0  |  |
| Lower White  | 1559                    | 19.7  | 2987  | 793  | 50.6 | 1.3  | 2.2  | 23.2 | 0.0  | 129  | 299  | 115  | 5980  | 25.8           | 0.3   | 49.5 | 13.1 | 0.8  | 0.0 | 0.0  | 0.4  | 0.0 | 2.1  | 5.0  | 1.9  |  |
| Total        | 3614                    | 31.7  | 5501  | 1390 | 110  | 6.5  | 2.2  | 56.5 | 59.5 | 286  | 703  | 1242 | 13002 | 27.8           | 0.2   | 42.3 | 10.7 | 0.8  | 0.0 | 0.0  | 0.4  | 0.5 | 2.2  | 5.4  | 9.5  |  |
| Southern     |                         |       |       |      |      |      |      |      |      |      |      |      |       |                |       |      |      |      |     |      |      |     |      |      |      |  |
| Kuskalana    | 118                     | 0.0   | 100   | 29.0 | 64.5 | 0.0  | 5.7  | 0.0  | 5.2  | 84.8 | 4.4  | 0.0  | 412   | 28.8           | 0.0   | 24.6 | 7.1  | 15.8 | 0.0 | 1.4  | 0.0  | 1.3 | 20.7 | 1.1  | 0.0  |  |
| Kotsina      | 267                     | 0.3   | 183   | 65.6 | 19.7 | 0.0  | 34.1 | 0.0  | 43.0 | 189  | 28.8 | 0.0  | 831   | 32.2           | 0.0   | 22.0 | 7.9  | 2.4  | 0.0 | 4.1  | 0.0  | 5.2 | 22.8 | 3.5  | 0.0  |  |
| Kennicott    | 344                     | 1.9   | 134   | 25.1 | 28.4 | 0.0  | 48.5 | 0.0  | 0.0  | 115  | 0.0  | 0.0  | 698   | 49.3           | 0.3   | 19.3 | 3.6  | 4.1  | 0.0 | 6.9  | 0.0  | 0.0 | 16.5 | 0.0  | 0.0  |  |
| Nizina       | 686                     | 3.1   | 217   | 300  | 22.8 | 0.0  | 91.9 | 0.0  | 0.0  | 116  | 55.7 | 0.0  | 1492  | 45.9           | 0.2   | 14.5 | 20.1 | 1.5  | 0.0 | 6.2  | 0.0  | 0.0 | 7.8  | 3.7  | 0.0  |  |
| Chitistone   | 148                     | 0.0   | 95.1  | 89.6 | 14.5 | 0.0  | 17.4 | 0.0  | 0.0  | 142  | 77.8 | 0.0  | 584   | 25.3           | 0.0   | 16.3 | 15.3 | 2.5  | 0.0 | 3.0  | 0.0  | 0.0 | 24.3 | 13.3 | 0.0  |  |
| Hawkins      | 74.7                    | 0.0   | 62.1  | 4.1  | 30.1 | 0.0  | 6.5  | 0.0  | 0.0  | 8.2  | 73.6 | 0.0  | 259   | 28.8           | 0.0   | 24.0 | 1.6  | 11.6 | 0.0 | 2.5  | 0.0  | 0.0 | 3.2  | 28.4 | 0.0  |  |
| Total        | 1638                    | 5.3   | 792   | 514  | 180  | 0.0  | 204  | 0.0  | 48.1 | 655  | 240  | 0.0  | 4276  | 38.3           | 0.1   | 18.5 | 12.0 | 4.2  | 0.0 | 4.8  | 0.0  | 1.1 | 15.3 | 5.6  | 0.0  |  |
| Northwestern |                         |       |       |      |      |      |      |      |      |      |      |      |       |                |       |      |      |      |     |      |      |     |      |      |      |  |
| Jacksina     | 175                     | 1.1   | 293   | 497  | 0.0  | 0.0  | 1.2  | 11.2 | 0.0  | 0.0  | 0.0  | 0.0  | 978   | 17.9           | 0.1   | 30.0 | 50.8 | 0.0  | 0.0 | 0.1  | 1.1  | 0.0 | 0.0  | 0.0  | 0.0  |  |
| Monte Cristo | 11.3                    | 0.0   | 22.2  | 41.7 | 1.2  | 0.0  | 0.0  | 4.1  | 0.0  | 0.0  | 0.0  | 0.0  | 80.5  | 14.0           | 0.0   | 27.4 | 51.4 | 1.5  | 0.0 | 0.0  | 5.1  | 0.0 | 0.0  | 0.0  | 0.0  |  |
| Bond         | 43.3                    | 0.0   | 21.6  | 0.0  | 11.5 | 0.0  | 0.0  | 66.2 | 0.0  | 6.4  | 30.2 | 0.0  | 179   | 24.1           | 0.0   | 12.0 | 0.0  | 6.4  | 0.0 | 0.0  | 36.8 | 0.0 | 3.5  | 16.8 | 0.0  |  |
| Nabesna      | 1479                    | 19.9  | 1210  | 935  | 26.7 | 0.0  | 310  | 162  | 0.0  | 182  | 160  | 0.0  | 4485  | 32.9           | 0.4   | 27.0 | 20.8 | 0.6  | 0.0 | 6.9  | 3.6  | 0.0 | 4.1  | 3.6  | 0.0  |  |
| Total        | 1708                    | 21.0  | 1548  | 1473 | 39.5 | 0.0  | 311  | 244  | 0.0  | 189  | 190  | 0.0  | 5723  | 29.9           | 0.4   | 27.0 | 25.7 | 0.7  | 0.0 | 5.4  | 4.3  | 0.0 | 3.3  | 3.3  | 0.0  |  |
| Western      |                         |       |       |      |      |      |      |      |      |      |      |      |       |                |       |      |      |      |     |      |      |     |      |      |      |  |
| Copper       | 386                     | 10.2  | 503   | 373  | 0.0  | 0.0  | 0.0  | 0.0  | 0.0  | 0.0  | 0.0  | 0.0  | 1272  | 30.3           | 0.8   | 39.5 | 29.3 | 0.0  | 0.0 | 0.0  | 0.0  | 0.0 | 0.0  | 0.0  | 0.0  |  |
| Drop         | 43.7                    | 0.0   | 122   | 61.7 | 0.0  | 0.0  | 0.0  | 0.0  | 0.0  | 0.0  | 0.0  | 0.0  | 227   | 19.2           | 0.0   | 53.6 | 27.2 | 0.0  | 0.0 | 0.0  | 0.0  | 0.0 | 0.0  | 0.0  | 0.0  |  |
| Boulder      | 28.0                    | 0.0   | 97.9  | 73.2 | 0.0  | 0.0  | 0.0  | 0.0  | 0.0  | 0.0  | 0.0  | 0.0  | 199   | 14.1           | 0.0   | 49.2 | 36.8 | 0.0  | 0.0 | 0.0  | 0.0  | 0.0 | 0.0  | 0.0  | 0.0  |  |
| Sanford      | 158                     | 0.0   | 146   | 174  | 0.0  | 0.0  | 0.1  | 0.3  | 0.0  | 0.0  | 0.0  | 0.0  | 479   | 33.0           | 0.0   | 30.5 | 36.4 | 0.0  | 0.0 | 0.0  | 0.1  | 0.0 | 0.0  | 0.0  | 0.0  |  |
| Nadina E.    | 0.0                     | 0.0   | 11.9  | 9.4  | 0.0  | 0.0  | 0.0  | 0.0  | 0.0  | 0.0  | 0.0  | 0.0  | 21.3  | 0.0            | 0.0   | 56.7 | 44.7 | 0.0  | 0.0 | 0.0  | 0.0  | 0.0 | 0.0  | 0.0  | 0.0  |  |
| Dadina       | 38.1                    | 0.0   | 53.0  | 111  | 0.0  | 0.0  | 0.4  | 0.0  | 8.3  | 0.0  | 15.8 | 0.0  | 226   | 16.8           | 0.0   | 23.4 | 48.7 | 0.0  | 0.0 | 0.2  | 0.0  | 3.7 | 0.0  | 6.9  | 0.0  |  |
| Chetaslina   | 85.3                    | 0.0   | 286   | 134  | 0.0  | 0.0  | 0.2  | 0.0  | 22.9 | 0.0  | 6.2  | 0.0  | 535   | 15.9           | 0.0   | 53.4 | 25.1 | 0.0  | 0.0 | 0.0  | 0.0  | 4.3 | 0.0  | 1.2  | 0.0  |  |
| Total        | 739                     | 10.2  | 1219  | 936  | 0.0  | 0.0  | 0.7  | 0.3  | 31.2 | 0.0  | 21.9 | 0.0  | 2959  | 25.0           | 0.3   | 41.2 | 31.6 | 0.0  | 0.0 | 0.0  | 0.0  | 1.1 | 0.0  | 0.7  | 0.0  |  |
| TOTAL        | 15763                   | 194   | 19000 | 8362 | 804  | 13.0 | 1917 | 860  | 246  | 2530 | 2549 | 2483 | 54722 | 28.8           | 0.4   | 34.7 | 15.3 | 1.5  | 0.0 | 3.5  | 1.6  | 0.5 | 4.6  | 4.7  | 4.5  |  |
