# Supplementary material
Source: publisher figshare collection journal article supplement (https://gsapubs.figshare.com/articles/dataset/_/15167367)
Supplement: Supplementary file 8 [file 1 › GS2471_SuppItemS8.pdf]

Supplement Item S8 - Igneous bedrock ages reported from the Wrangell Arc, Alaska and Canada

| Latitude (N degree) | Longitude (W degree) | Preferred age (Ma) | Sample name | Rock type             | Geochron. Method | Phase Dated        | Reference                                                                                                           |
|---------------------|----------------------|--------------------|-------------|-----------------------|------------------|--------------------|---------------------------------------------------------------------------------------------------------------------|
| 61.60               | -144.20              | 0.05               | 66AYeC1A    | Andesite              | K/Ar             | Plagioclase        | Yehle, L.A. and Nichols, D.R., 1980, U.S.G.S. Misc. Field Studies Map MF-1209.                                      |
| 63.68               | -138.70              | 0.05               | UA 582      | Volcanic              | Fission Track    | Whole Rock (Glass) | Naeser et al., 1982, Canadian Journal of Earth Sciences, v. 19, p. 2167-2178.                                       |
| 62.92               | -137.37              | 0.08               | VNCH-98-08a | Volcanic              | Ar/Ar            | Whole Rock         | Joyce et al., 2015, Geological Survey of Canada Open File 7924.                                                     |
| 61.98               | -144.21              | 0.08               | 79C9NF 1    | Andesite              | K/Ar             | Whole rock         | Nye, C., 1983, PhD dissertation, U.C. Santa Cruz; Richter et al., 1990, Bulletin of Volcanology, v. 53, p. 29-44.   |
| 67.47               | -139.90              | 0.12               | UT 1        | Volcanic              | Fission Track    | Whole Rock (Glass) | Naeser et al., 1982, Canadian Journal of Earth Sciences, v. 19, p. 2167-2178.                                       |
| 64.02               | -139.40              | 0.13               | UT1637      | Volcanic              | Fission Track    | Whole Rock (Glass) | Sandhu et al., 2001, Yukon Exploration and Geology 2000, Exploration and Geological Services Division, p. 247-256.  |
| 60.15               | -129.68              | 0.23               | 581         | Volcanic              | K/Ar             | Whole Rock         | Klassen, R.W., 1987, Geological Survey of Canada, Paper 86-17.                                                      |
| 62.06               | -144.65              | 0.24               | 74ALe 10    | Dacite                | K/Ar             | Biotite            | Richter et al., 1990, Bulletin of Volcanology, v. 53, p. 29-44.                                                     |
| 62.06               | -144.66              | 0.24               | 744ALe52    | Dacite                | K/Ar             | Whole rock         | Richter et al., 1990, Bulletin of Volcanology, v. 53, p. 29-44.                                                     |
| 61.85               | -144.62              | 0.27               | 79C9C 1     | Andesite              | K/Ar             | Whole rock         | Nye, C., 1983, PhD dissertation, U.C. Santa Cruz; Richter et al., 1990, Bulletin of Volcanology, v. 53, p. 29-44.   |
| 62.18               | -144.65              | 0.27               | 74ALe 5     | Dacite                | K/Ar             | Biotite            | Richter et al., 1990, Bulletin of Volcanology, v. 53, p. 29-44.                                                     |
| 62.07               | -144.58              | 0.30               | 74ALe 54    | Dacite                | K/Ar             | Whole rock         | Richter et al., 1990, Bulletin of Volcanology, v. 53, p. 29-44.                                                     |
| 62.04               | -144.60              | 0.30               | 74ALe 12    | Andesite              | K/Ar             | Whole rock         | Richter et al., 1990, Bulletin of Volcanology, v. 53, p. 29-44.                                                     |
| 62.07               | -144.74              | 0.30               | 74ALe 61    | Andesite              | K/Ar             | Whole rock         | Richter et al., 1990, Bulletin of Volcanology, v. 53, p. 29-44.                                                     |
| 62.02               | -144.60              | 0.31               | 74ALe 3     | Andesite              | K/Ar             | Whole rock         | Richter et al., 1990, Bulletin of Volcanology, v. 53, p. 29-44.                                                     |
| 62.83               | -137.70              | 0.31               | JJC990007   | Volcanic              | Ar/Ar            | Whole Rock         | Huscroft et al., 2004, Canadian Journal of Earth Sciences, v. 41, p. 141-164.                                       |
| 62.17               | -143.93              | 0.32               | 73ARH87     | Basalt                | K/Ar             | Whole rock         | Richter, D.H., et al., 1993, Geologic Map of the Nabesna B-6 Quadrangle, South-central Alaska, U.S.G.S. Map GQ-1688 |
| 62.32               | -143.92              | 0.32               | 73ARH87     | Andesite              | K/Ar             | Whole rock         | Richter et al., 1990, Bulletin of Volcanology, v. 53, p. 29-44.                                                     |
| 62.02               | -144.60              | 0.32               | 74ALe 50    | Dacite                | K/Ar             | Biotite            | Richter et al., 1990, Bulletin of Volcanology, v. 53, p. 29-44.                                                     |
| 62.12               | -144.53              | 0.34               | 74ALe 51    | Dacite                | K/Ar             | Whole rock         | Richter et al., 1990, Bulletin of Volcanology, v. 53, p. 29-44.                                                     |
| 62.06               | -144.51              | 0.35               | 74ALe 15    | Dacite                | K/Ar             | Whole rock         | Richter et al., 1990, Bulletin of Volcanology, v. 53, p. 29-44.                                                     |
| 62.16               | -144.52              | 0.36               | 74ALe 6     | Dacite                | K/Ar             | Biotite            | Richter et al., 1990, Bulletin of Volcanology, v. 53, p. 29-44.                                                     |
| 62.12               | -144.75              | 0.37               | 74ALe 56    | Dacite                | K/Ar             | Whole rock         | Richter et al., 1990, Bulletin of Volcanology, v. 53, p. 29-44.                                                     |
| 61.98               | -144.31              | 0.42               | 79C9E 29    | Andesite              | K/Ar             | Whole rock         | Nye, C., 1983, PhD dissertation, U.C. Santa Cruz; Richter et al., 1990, Bulletin of Volcanology, v. 53, p. 29-44.   |
| 62.15               | -144.65              | 0.42               | 74ALe 8     | Andesite              | K/Ar             | Whole rock         | Richter et al., 1990, Bulletin of Volcanology, v. 53, p. 29-44.                                                     |
| 61.78               | -144.69              | 0.43               | 79C9D 2     | Andesite              | K/Ar             | Whole rock         | Nye, C., 1983, PhD dissertation, U.C. Santa Cruz; Richter et al., 1990, Bulletin of Volcanology, v. 53, p. 29-44.   |
| 62.06               | -144.59              | 0.44               | 74ALe 57    | Dacite                | K/Ar             | Whole rock         | Richter et al., 1990, Bulletin of Volcanology, v. 53, p. 29-44.                                                     |
| 62.04               | -144.64              | 0.46               | 74ALe 53    | Andesite              | K/Ar             | Whole rock         | Richter et al., 1990, Bulletin of Volcanology, v. 53, p. 29-44.                                                     |
| 62.07               | -144.61              | 0.47               | 74ALe 60    | Rhyolite              | K/Ar             | Whole rock         | Richter et al., 1990, Bulletin of Volcanology, v. 53, p. 29-44.                                                     |
| 62.12               | -144.56              | 0.48               | 74ALe 58    | Rhyolite              | K/Ar             | Biotite            | Richter et al., 1990, Bulletin of Volcanology, v. 53, p. 29-44.                                                     |
| 62.13               | -143.82              | 0.50               | 76m15       | Andesite              | K/Ar             | Whole rock         | Nye, C., 1983, PhD dissertation, U.C. Santa Cruz; Richter et al., 1990, Bulletin of Volcanology, v. 53, p. 29-44.   |
| 62.09               | -144.23              | 0.51               | 87AWs 8     | Andesite              | K/Ar             | Plagioclase        | Richter et al., 1990, Bulletin of Volcanology, v. 53, p. 29-44.                                                     |
| 62.09               | -144.65              | 0.52               | 74ALe 24    | Andesite              | K/Ar             | Whole rock         | Richter et al., 1990, Bulletin of Volcanology, v. 53, p. 29-44.                                                     |
| 62.08               | -144.54              | 0.53               | 74ALe 17    | Rhyolite              | K/Ar             | Whole rock         | Richter et al., 1990, Bulletin of Volcanology, v. 53, p. 29-44.                                                     |
| 62.09               | -144.60              | 0.53               | 74ALe 55    | Andesite              | K/Ar             | Whole rock         | Richter et al., 1990, Bulletin of Volcanology, v. 53, p. 29-44.                                                     |
| 62.32               | -143.96              | 0.53               | 74ALe29     | Dacite                | K/Ar             | Whole rock         | Richter et al., 1990, Bulletin of Volcanology, v. 53, p. 29-44.                                                     |
| 60.23               | -129.10              | 0.55               | 2381        | Volcanic              | K/Ar             | Whole Rock         | Klassen, R.W., 1987, Geological Survey of Canada, Paper 86-17.                                                      |
| 62.90               | -137.41              | 0.56               | VNCH-98-10  | Volcanic              | Ar/Ar            | Whole Rock         | Joyce et al., 2015, Geological Survey of Canada Open File 7924.                                                     |
| 62.09               | -144.53              | 0.56               | 74ALe 4     | Rhyolite              | K/Ar             | Whole rock         | Richter et al., 1990, Bulletin of Volcanology, v. 53, p. 29-44.                                                     |
| 62.12               | -143.89              | 0.60               | 78m19       | Andesite              | K/Ar             | Plagioclase        | Nye, C., 1983, PhD dissertation, U.C. Santa Cruz; Richter et al., 1990, Bulletin of Volcanology, v. 53, p. 29-44.   |
| 62.09               | -143.90              | 0.60               | 78m4        | Andesite              | K/Ar             | Whole rock         | Nye, C., 1983, PhD dissertation, U.C. Santa Cruz; Richter et al., 1990, Bulletin of Volcanology, v. 53, p. 29-44.   |
| 62.04               | -144.40              | 0.60               | 87AWs 7     | Andesite              | K/Ar             | Whole rock         | Richter et al., 1990, Bulletin of Volcanology, v. 53, p. 29-44.                                                     |
| 60.08               | -128.90              | 0.60               | 2481        | Volcanic              | K/Ar             | Whole Rock         | Klassen, R.W., 1987, Geological Survey of Canada, Paper 86-17.                                                      |
| 62.30               | -144.11              | 0.62               | 74ALe 26    | Dacite                | K/Ar             | Whole rock         | Richter et al., 1990, Bulletin of Volcanology, v. 53, p. 29-44.                                                     |
| 62.12               | -144.56              | 0.67               | 74ALe 58    | Rhyolite              | K/Ar             | Whole rock         | Richter et al., 1990, Bulletin of Volcanology, v. 53, p. 29-44.                                                     |
| 62.08               | -144.49              | 0.67               | 87AWs 4     | Dacite                | K/Ar             | Plagioclase        | Richter et al., 1990, Bulletin of Volcanology, v. 53, p. 29-44.                                                     |
| 62.12               | -144.53              | 0.69               | 74ALe 51    | Dacite                | K/Ar             | Plagioclase        | Richter et al., 1990, Bulletin of Volcanology, v. 53, p. 29-44.                                                     |
| 61.97               | -144.30              | 0.69               | 79C9E 3     | Andesite              | K/Ar             | Whole rock         | Nye, C., 1983, PhD dissertation, U.C. Santa Cruz; Richter et al., 1990, Bulletin of Volcanology, v. 53, p. 29-44.   |
| 62.14               | -144.60              | 0.73               | 74ALe 9     | Andesite              | K/Ar             | Whole rock         | Richter et al., 1990, Bulletin of Volcanology, v. 53, p. 29-44.                                                     |
| 62.19               | -144.19              | 0.73               | 74ALe 65    | Andesite              | K/Ar             | Whole rock         | Richter et al., 1990, Bulletin of Volcanology, v. 53, p. 29-44.                                                     |
| 62.09               | -143.90              | 0.75               | 79c9f8a     | Andesite              | K/Ar             | Whole rock         | Nye, C., 1983, PhD dissertation, U.C. Santa Cruz; Richter et al., 1990, Bulletin of Volcanology, v. 53, p. 29-44.   |
| 62.09               | -143.90              | 0.75               | 79c9f8b     | Andesite              | K/Ar             | Whole rock         | Nye, C., 1983, PhD dissertation, U.C. Santa Cruz; Richter et al., 1990, Bulletin of Volcanology, v. 53, p. 29-44.   |
| 60.07               | -128.82              | 0.77               | 481         | Volcanic              | K/Ar             | Whole Rock         | Klassen, R.W., 1987, Geological Survey of Canada, Paper 86-17.                                                      |
| 62.19               | -144.19              | 0.78               | 74ALe 63    | Andesite              | K/Ar             | Whole rock         | Richter et al., 1990, Bulletin of Volcanology, v. 53, p. 29-44.                                                     |
| 62.16               | -144.22              | 0.78               | 87AWs 3     | Andesite              | K/Ar             | Plagioclase        | Richter et al., 1990, Bulletin of Volcanology, v. 53, p. 29-44.                                                     |
| 62.04               | -144.69              | 0.81               | 74ALe 21    | Other                 | K/Ar             | Biotite            | Richter et al., 1990, Bulletin of Volcanology, v. 53, p. 29-44.                                                     |
| 62.02               | -144.28              | 0.84               | 87AWs 5     | Dacite                | K/Ar             | Hornblende         | Richter et al., 1990, Bulletin of Volcanology, v. 53, p. 29-44.                                                     |
| 62.82               | -137.45              | 0.84               | UT 81       | Volcanic              | Fission Track    | Whole Rock (Glass) | Naeser et al., 1982, Canadian Journal of Earth Sciences, v. 19, p. 2167-2178.                                       |
| 62.19               | -144.19              | 0.85               | 74ALe 64    | Andesite              | K/Ar             | Whole rock         | Richter et al., 1990, Bulletin of Volcanology, v. 53, p. 29-44.                                                     |
| 62.19               | -144.19              | 0.86               | 74ALe 62    | Andesite              | K/Ar             | Whole rock         | Richter et al., 1990, Bulletin of Volcanology, v. 53, p. 29-44.                                                     |
| 62.78               | -137.40              | 0.86               | UT 82       | Volcanic              | Fission Track    | Whole Rock (Glass) | Naeser et al., 1982, Canadian Journal of Earth Sciences, v. 19, p. 2167-2178.                                       |
| 62.19               | -144.26              | 0.89               | 87AWs 2     | Andesite              | K/Ar             | Plagioclase        | Richter et al., 1990, Bulletin of Volcanology, v. 53, p. 29-44.                                                     |
| 62.04               | -144.69              | 0.90               | 74ALe 21    | Other                 | K/Ar             | Hornblende         | Richter et al., 1990, Bulletin of Volcanology, v. 53, p. 29-44.                                                     |
| 62.05               | -143.22              | 0.91               | 73ARH99     | Andesite              | K/Ar             | Whole rock         | Richter and Smith, 1976; Richter and others, 1990                                                                   |
| 62.90               | -137.42              | 0.91               | SE VM-2     | Volcanic              | K/Ar             | Whole Rock         | Souther, J.G. and Armstrong, R.L. 1974. Unpublished data.                                                           |
| 62.82               | -137.45              | 0.94               | UT 81       | Volcanic              | Fission Track    | Zircon             | Naeser et al., 1982, Canadian Journal of Earth Sciences, v. 19, 2167-2178.                                          |
| 62.16               | -143.90              | 0.96               | 74ALe27     | Dacite                | K/Ar             | Whole rock         | Richter et al., 1990, Bulletin of Volcanology, v. 53, p. 29-44.                                                     |
| 62.35               | -143.55              | 0.97               | 81ASJ86N    | Basalt                | K/Ar             | Whole rock         | Richter and others, 1984, 1990, 1993                                                                                |
| 61.96               | -144.20              | 0.98               | 74C9NF 2    | Andesite              | K/Ar             | Whole rock         | Nye, C., 1983, PhD dissertation, U.C. Santa Cruz; Richter et al., 1990, Bulletin of Volcanology, v. 53, p. 29-44.   |
| 62.78               | -137.40              | 1.01               | UT 82       | Volcanic              | Fission Track    | Whole Rock (Glass) | Westgate, J.A. 1989. Earth and Planetary Science Letters 95 226-234.                                                |
| 62.46               | -144.13              | 1.02               | BCM-6       | Andesite              | K/Ar             | Whole rock         | Richter et al., 1990, Bulletin of Volcanology, v. 53, p. 29-44.                                                     |
| 62.43               | -144.12              | 1.03               | BCM-4       | Andesite              | K/Ar             | Whole rock         | Richter et al., 1990, Bulletin of Volcanology, v. 53, p. 29-44.                                                     |
| 62.44               | -144.14              | 1.04               | BCM-5       | Andesite              | K/Ar             | Whole rock         | Richter et al., 1990, Bulletin of Volcanology, v. 53, p. 29-44.                                                     |
| 62.93               | -137.37              | 1.07               | SE VM-3     | Volcanic              | K/Ar             | Whole Rock         | Souther, J.G. and Armstrong, R.L. 1974. unpublished data.                                                           |
| 62.82               | -137.45              | 1.08               | Above UT 81 | Volcanic              | K/Ar             | Whole Rock         | Naeser et al., 1982, Canadian Journal of Earth Sciences, v. 19, 2167-2178.                                          |
| 62.40               | -144.03              | 1.09               | 73ARH105    | Rhyolite              | K/Ar             | Plagioclase        | Richter et al., 1990, Bulletin of Volcanology, v. 53, p. 29-44.                                                     |
| 62.78               | -137.40              | 1.19               | UT 82       | Volcanic              | Fission Track    | Whole Rock (Glass) | Westgate, J.A., 1989, Earth and Planetary Science Letters, v. 95, p. 226-234.                                       |
| 63.97               | -139.32              | 1.22               | UT 19       | Volcanic              | Fission Track    | Whole Rock (Glass) | Nelson et al., 2009, Canadian Journal of Earth Sciences, v. 46, p. 381-401.                                         |
| 62.01               | -144.54              | 1.23               | 74ALe 66    | Rhyolite              | K/Ar             | Whole rock         | Richter et al., 1990, Bulletin of Volcanology, v. 53, p. 29-44.                                                     |
| 62.81               | -137.45              | 1.28               | 010789-R1   | Volcanic              | K/Ar             | Whole Rock         | Jackson et al., 1996, Canadian Journal of Earth Sciences, v. 33, p. 904-916.                                        |
| 62.79               | -137.40              | 1.33               | YR97        | Volcanic              | Ar/Ar            | Whole Rock         | Nelson et al., 2009, Canadian Journal of Earth Sciences, v. 46, p. 381-401.                                         |
| 62.05               | -144.36              | 1.35               | 87AWs 6     | Dacite                | K/Ar             | Biotite            | Richter et al., 1990, Bulletin of Volcanology, v. 53, p. 29-44.                                                     |
| 62.81               | -137.45              | 1.35               | UB82-683p   | Volcanic              | K/Ar             | Whole Rock         | Westgate, J.A., 1989, Earth and Planetary Science Letters, v. 95, p. 226-234.                                       |
| 62.78               | -137.40              | 1.35               | UB82-683    | Volcanic              | K/Ar             | Whole Rock         | Westgate, J.A., 1989, Earth and Planetary Science Letters, v. 95, p. 226-234.                                       |
| 62.79               | -137.41              | 1.37               | VNCH-12     | Volcanic              | Ar/Ar            | Whole Rock         | Nelson et al., 2009, Canadian Journal of Earth Sciences, v. 46, p. 381-401.                                         |
| 62.06               | -143.48              | 1.38               | 72ARH310    | Dacite                | K/Ar             | Plagioclase        | Richter, D.H., and Smith, R.G., 1976, Geologic map of the Nabesna A-5 quadrangle, U.S.G.S. map GQ-1062.             |
| 63.97               | -139.32              | 1.42               | UT 19       | Volcanic              | Fission Track    | Whole Rock (Glass) | Sandhu et al., 2001, Yukon Exploration and Geology 2000, Yukon, Indian and Northern Affairs Canada 0 247 256.       |
| 62.05               | -142.18              | 1.43               | SB-57       | Lava                  | 40Ar/39Ar        | Whole rock         | This study                                                                                                          |
| 62.78               | -137.40              | 1.43               | UT 82       | Volcanic              | Fission Track    | Whole Rock (Glass) | Westgate, J.A., 1989, Earth and Planetary Science Letters, v. 95, p. 226-234.                                       |
| 61.86               | -144.87              | 1.44               | 79KJ 34     | Andesite              | K/Ar             | Whole rock         | Connor, C.L., 1984, PhD dissertation, University of Montana.                                                        |
| 62.79               | -137.40              | 1.47               | UB82-783a   | Volcanic              | K/Ar             | Whole Rock         | Westgate, J.A., 1989, Earth and Planetary Science Letters, v. 95, p. 226-234.                                       |
| 62.81               | -137.98              | 1.48               | JJC990014   | Volcanic              | Ar/Ar            | Whole Rock         | Huscroft, C.A., 2002, M.Sc. thesis, Simon Fraser University.                                                        |
| 62.05               | -142.20              | 1.49               | SB-64       | Lava                  | 40Ar/39Ar        | Whole rock         | This study                                                                                                          |
| 62.18               | -143.43              | 1.50               | 73ARH56     | Andesite              | K/Ar             | Plagioclase        | Richter, D.H., and Smith, R.G., 1976, Geologic map of the Nabesna A-5 quadrangle, U.S.G.S. map GQ-1062.             |
| 62.78               | -137.40              | 1.54               | UT 82       | Volcanic              | Fission Track    | Whole Rock (Glass) | Westgate, J.A. 1989. Earth and Planetary Science Letters 95 226-234.                                                |
| 61.97               | -144.30              | 1.58               | 79C9E 1     | Andesite              | K/Ar             | Whole rock         | Nye, C., 1983, PhD dissertation, U.C. Santa Cruz; Richter et al., 1990, Bulletin of Volcanology, v. 53, p. 29-44.   |
| 61.77               | -141.81              | 1.60               | 8           | Andesite              | K/Ar             | Whole rock         | Denton and Armstrong, 1969, American Journal of Science, v. 267, p. 1121-1142.                                      |
| 62.78               | -137.40              | 1.60               | UB82-983a   | Volcanic              | K/Ar             | Whole Rock         | Westgate, J.A., 1989, Earth and Planetary Science Letters, v. 95, p. 226-234.                                       |
| 62.05               | -142.19              | 1.61               | SB-62       | Lava                  | 40Ar/39Ar        | Whole rock         | This study                                                                                                          |
| 62.34               | -143.56              | 1.63               | 81ASJ77BN   | Andesite              | K/Ar             | Whole rock         | Richter et al., 1990, Bulletin of Volcanology, v. 53, p. 29-44.                                                     |
| 62.05               | -142.19              | 1.65               | SB-63       | Lava                  | 40Ar/39Ar        | Whole rock         | This study                                                                                                          |
| 62.01               | -143.28              | 1.67               | 72ARH307a   | Dacite                | K/Ar             | Plagioclase        | Richter et al., 1990, Bulletin of Volcanology, v. 53, p. 29-44.                                                     |
| 61.36               | -143.73              | 1.74               | 81ASJ72     | Andesite              | K/Ar             | Biotite            | Richter et al., 1990, Bulletin of Volcanology, v. 53, p. 29-44.                                                     |
| 62.05               | -142.19              | 1.82               | SB-58       | Lava                  | 40Ar/39Ar        | Whole rock         | This study                                                                                                          |
| 62.79               | -137.41              | 1.82               | VNCH-13     | Volcanic              | Ar/Ar            | Whole Rock         | Nelson et al., 2009, Canadian Journal of Earth Sciences, v. 46, p. 381-401.                                         |
| 62.05               | -142.24              | 1.85               | 53LA        | Rhyolite lava or tuff | 40Ar/39Ar        | Whole rock         | This study                                                                                                          |
| 62.05               | -142.19              | 1.90               | SB-61       | Lava                  | 40Ar/39Ar        | Whole rock         | This study                                                                                                          |
| 60.46               | -135.43              | 1.90               | 93CH-24-2   | Volcanic              | K/Ar             | Whole Rock         | Hart, C.J.R., and Villeneuve, M., 1999, Canadian Journal of Earth Sciences, v. 36, p. 1495-1507.                    |
| 62.05               | -142.19              | 1.93               | SB-60       | Lava                  | 40Ar/39Ar        | Whole rock         | This study                                                                                                          |

|       |         |       |                  |              |                |                    |                                                                                                         |
|-------|---------|-------|------------------|--------------|----------------|--------------------|---------------------------------------------------------------------------------------------------------|
| 62.34 | -143.56 | 1.99  | 81ASJ77BF        | Andesite     | K/Ar           | Whole rock         | Richter et al., 1990, Bulletin of Volcanology, v. 53, p. 29-44.                                         |
| 62.05 | -142.21 | 1.99  | SB-65            | Lava         | 40Ar/39Ar      | Whole rock         | This study                                                                                              |
| 62.05 | -142.19 | 2.01  | SB-59            | Lava         | 40Ar/39Ar      | Whole rock         | This study                                                                                              |
| 62.59 | -143.45 | 2.02  | 69ARh311         | Andesite     | K/Ar           | Whole rock         | Richter and Schmoll, 1973; Richter and others, 1990                                                     |
| 62.74 | -137.28 | 2.08  | 260689-R5        | Volcanic     | K/Ar           | Whole Rock         | Jackson et al., 1996, Canadian Journal of Earth Sciences, v. 33, p. 904-916.                            |
| 62.05 | -142.24 | 2.09  | 51LA-RHYOLITE    | Rhyolite     | 40Ar/39Ar      | Whole rock         | This study                                                                                              |
| 62.05 | -142.24 | 2.15  | 52LA             | Rhyolite     | 40Ar/39Ar      | Whole rock         | This study                                                                                              |
| 62.33 | -143.76 | 2.21  | 81ASJ85          | Andesite     | K/Ar           | Whole rock         | Richter et al., 1990, Bulletin of Volcanology, v. 53, p. 29-44.                                         |
| 62.76 | -137.29 | 2.36  | 290689-R2        | Volcanic     | K/Ar           | Whole Rock         | Jackson et al., 1996, Canadian Journal of Earth Sciences 33 904 916.                                    |
| 62.05 | -142.24 | 2.40  | 51LA-BASALT      | Basalt lava  | 40Ar/39Ar      | Whole rock         | Brueseke et al., 2019, Terra Nova, v. 31, p. 59-66.                                                     |
| 60.55 | -135.53 | 2.40  | SEIM-1           | Volcanic     | K/Ar           | Whole Rock         | Hart, C.J.R. and Villeneuve, M. 1999. Canadian Journal of Earth Sciences 36 1495 1507.                  |
| 61.86 | -144.87 | 2.50  | 79KJ 34          | Andesite     | K/Ar           | Plagioclase        | Connor, 1984; Richter and others, 1990                                                                  |
| 62.05 | -142.23 | 2.61  | 50LA             | Lava         | 40Ar/39Ar      | Whole rock         | This study                                                                                              |
| 64.13 | -139.25 | 2.64  | K-91-6-29C       | Volcanic     | Ar/Ar          | Hornblende         | Kunk, M.J. 1995. U.S. Geological Survey Open-File Report 95-217A 0 52 0.                                |
| 61.78 | -141.79 | 2.80  | 6                | Andesite     | K/Ar           | Whole rock         | Denton and Armstrong, 1969, American Journal of Science, v. 267, p. 1121-1142.                          |
| 62.48 | -143.01 | 2.84  | 71PCL41          | Andesite     | K/Ar           | Whole rock         | Lowe and others, 1983, Geologic map of the Nabesna B-5 quadrangle, U.S.G.S. Map GQ-1566.                |
| 62.04 | -143.05 | 2.93  | 73ARh111         | Rhyolite     | K/Ar           | Plagioclase        | Richter, D.H., and Smith, R.G., 1976, Geologic map of the Nabesna A-5 quadrangle, U.S.G.S. map GQ-1062. |
| 63.81 | -139.07 | 3.00  | UT1001           | Volcanic     | Fission Track  | Whole Rock (Glass) | Sandhu et al. 2001. Yukon Exploration and Geology 2000, Indian and Northern Affairs Canada 0 247 256.   |
| 62.42 | -143.15 | 3.02  | 71PCL242         | Dacite       | 40Ar/39Ar      | Plagioclase        | Lowe and others, 1983, Geologic map of the Nabesna B-5 quadrangle, U.S.G.S. Map GQ-1566.                |
| 64.39 | -140.65 | 3.05  | MLB-89-362       | Volcanic     | K/Ar           | Whole Rock         | Hunt, P.A. and Roddick, J.C., 1992, Geological Survey of Canada, Paper 91-2, p. 207-261.                |
| 60.46 | -135.43 | 3.12  | 93CH-24-2        | Volcanic     | Ar/Ar          | Whole Rock         | Hart, C.J.R., and Villeneuve, M., 1999, Canadian Journal of Earth Sciences, v. 36, p. 1495-1507.        |
| 62.30 | -143.05 | 3.16  | 81ASJ45          | Basalt       | K/Ar           | Whole rock         | Richter et al., 1990, Bulletin of Volcanology, v. 53, p. 29-44.                                         |
| 62.76 | -137.29 | 3.21  | YR99             | Volcanic     | Ar/Ar          | Whole Rock         | Nelson et al., 2009, Canadian Journal of Earth Sciences, v. 46, p. 381-401.                             |
| 62.30 | -143.05 | 3.23  | 81ASJ45          | Basalt       | K/Ar           | Whole rock         | Richter et al., 1990, Bulletin of Volcanology, v. 53, p. 29-44.                                         |
| 60.44 | -135.44 | 3.30  | 96CH-AL1         | Volcanic     | Ar/Ar          | Whole Rock         | Hart, C.J.R., and Villeneuve, M., 1999, Canadian Journal of Earth Sciences, v. 36, p. 1495-1507.        |
| 61.65 | -143.55 | 3.41  | 81ASJ11          | Granodiorite | K/Ar           | Hornblende         | Richter et al., 1990, Bulletin of Volcanology, v. 53, p. 29-44.                                         |
| 62.31 | -143.27 | 3.46  | SB-66            | Lava         | 40Ar/39Ar      | Whole rock         | This study                                                                                              |
| 61.65 | -143.55 | 3.48  | 81ASJ11          | Granodiorite | K/Ar           | Biotite            | Richter et al., 1990, Bulletin of Volcanology, v. 53, p. 29-44.                                         |
| 61.78 | -141.83 | 3.80  | 7                | Andesite     | K/Ar           | Whole rock         | Denton and Armstrong, 1969, American Journal of Science, v. 267, p. 1121-1142.                          |
| 61.63 | -143.66 | 3.84  | 70AMk 61C        | Dacite       | K/Ar           | Hornblende         | Berry et al., 1976, U.S.G.S. Circular 727.                                                              |
| 62.75 | -137.27 | 3.92  | 300689-R2        | Volcanic     | K/Ar           | Whole Rock         | Hunt, P.A., and Roddick, J.C., 1992, Geological Survey of Canada, Paper 92-2, p. 179-226.               |
| 61.58 | -143.38 | 4.07  | 81ASJ37          | Granodiorite | K/Ar           | Hornblende         | Richter et al., 1990, Bulletin of Volcanology, v. 53, p. 29-44.                                         |
| 61.58 | -143.38 | 4.21  | 81ASJ37          | Granodiorite | K/Ar           | Biotite            | Richter et al., 1990, Bulletin of Volcanology, v. 53, p. 29-44.                                         |
| 61.58 | -143.38 | 4.48  | 81ASJ37          | Granodiorite | K/Ar           | Biotite            | Richter et al., 1990, Bulletin of Volcanology, v. 53, p. 29-44.                                         |
| 61.97 | -142.91 | 4.51  | SB15-08          | Lava         | 40Ar/39Ar      | Whole rock         | This study                                                                                              |
| 61.97 | -142.90 | 4.59  | SB15-09          | Lava         | 40Ar/39Ar      | Whole rock         | This study                                                                                              |
| 61.97 | -142.90 | 4.72  | SB15-10          | Lava         | 40Ar/39Ar      | Whole rock         | This study                                                                                              |
| 61.97 | -142.90 | 4.87  | SB15-11          | Lava         | 40Ar/39Ar      | Whole rock         | This study                                                                                              |
| 61.96 | -142.90 | 4.94  | SB15-12          | Lava         | 40Ar/39Ar      | Whole rock         | This study                                                                                              |
| 62.01 | -142.90 | 5.15  | SB15-14          | Lava         | 40Ar/39Ar      | Whole rock         | This study                                                                                              |
| 61.97 | -142.91 | 5.17  | SB15-06          | Lava         | 40Ar/39Ar      | Whole rock         | This study                                                                                              |
| 62.20 | -143.02 | 5.22  | 81ASJ44          | Andesite     | K/Ar           | Whole rock         | Richter et al., 1990, Bulletin of Volcanology, v. 53, p. 29-44.                                         |
| 61.62 | -142.84 | 5.26  | MGA-2            | Lava         | 40/39 Isochron | Plagioclase        | Trop et al., 2012, Geosphere, v., 8, p. 805-834.                                                        |
| 61.61 | -142.54 | 5.30  | NZM-67           | Lava         | 40/39 Isochron | Plagioclase        | Trop et al., 2012, Geosphere, v., 8, p. 805-834.                                                        |
| 61.77 | -141.79 | 5.36  | MB16-15          | Lava?        | 40Ar/39Ar      | Whole rock         | This study                                                                                              |
| 61.98 | -142.90 | 5.49  | SB15-05          | Lava         | 40Ar/39Ar      | Whole rock         | This study                                                                                              |
| 62.02 | -142.89 | 5.59  | O2LA             | Porphyry     | 40Ar/39Ar      | Whole rock         | This study                                                                                              |
| 61.98 | -142.90 | 5.62  | SB15-04          | Lava         | 40Ar/39Ar      | Whole rock         | This study                                                                                              |
| 62.00 | -142.90 | 5.65  | SB-01            | Lava         | 40Ar/39Ar      | Whole rock         | This study                                                                                              |
| 62.02 | -142.89 | 5.70  | O1LA             | Basalt dike  | 40Ar/39Ar      | Whole rock         | This study                                                                                              |
| 62.00 | -142.90 | 5.74  | SB-02            | Lava         | 40Ar/39Ar      | Whole rock         | This study                                                                                              |
| 61.42 | -142.80 | 5.90  | 74AMS13          | Dacite       | K/Ar           | Chlorite           | Silberman and MacKevett, written communication, 1977                                                    |
| 61.44 | -140.50 | 6.40  | WN-124-74        | Plutonic     | K/Ar           | Whole Rock         | Stevens et al. 1982, Geological Survey of Canada, Paper 82-2. 0 1 56.                                   |
| 61.49 | -142.83 | 6.69  | 74AMS17          | Rhyolite     | K/Ar           | Sanidine           | MacKevett, 1976; Silberman and others, 1976; Richter and others, 1990                                   |
| 60.58 | -134.96 | 7.10  | 94CH-1-1         | Volcanic     | K/Ar           | Whole Rock         | Hart, C.J.R. and Villeneuve, M. 1999. Canadian Journal of Earth Sciences 36 1495 1507.                  |
| 62.00 | -142.91 | 7.16  | SB15-03          | Lava         | 40Ar/39Ar      | Whole rock         | This study                                                                                              |
| 62.48 | -143.10 | 7.17  | 12LA             | Basalt flow  | 40Ar/39Ar      | Whole rock         | This study                                                                                              |
| 61.97 | -142.91 | 7.55  | SB15-07          | Lava         | 40Ar/39Ar      | Whole rock         | This study                                                                                              |
| 61.62 | -142.75 | 8.24  | PL-335           | Lava         | 40/39 Plateau  | Groundmass         | Trop et al., 2012, Geosphere, v. 8, p. 805-834.                                                         |
| 61.73 | -142.49 | 8.34  | CHM-38           | Lava         | 40/39 Plateau  | Plagioclase        | Trop et al., 2012, Geosphere, v. 8, p. 805-834.                                                         |
| 61.10 | -140.22 | 8.40  | 100-Cac-77-1     | Plutonic     | K/Ar           | Biotite            | Dodds, C.J. and Campbell, R.B., 1988, Geological Survey of Canada Paper 87-16.                          |
| 61.10 | -140.22 | 8.40  | 100-Cac-77-1     | Plutonic     | K/Ar           | Hornblende         | Dodds, C.J. and Campbell, R.B., 1988, Geological Survey of Canada Paper 87-16.                          |
| 60.70 | -135.04 | 8.40  | TMH-2            | Volcanic     | Ar/Ar          | Whole Rock         | Hart, C.J.R. and Villeneuve, M., 1999, Canadian Journal of Earth Sciences, v. 36, p. 1495-1507.         |
| 61.77 | -141.80 | 8.60  | 5                | Andesite     | K/Ar           | Whole rock         | Denton and Armstrong, 1969, American Journal of Science, v. 267, p. 1121-1142.                          |
| 61.37 | -142.05 | 8.60  | BB17             | Granodiorite | K/Ar           | Biotite            | MacKevett, E., 1970, U.S.G.S. Bulletin 1333, p. 1-31.                                                   |
| 61.37 | -142.05 | 8.60  | BB17             | Granodiorite | K/Ar           | Hornblende         | MacKevett, E., 1970, U.S.G.S. Bulletin 1333, p. 1-31.                                                   |
| 61.77 | -141.79 | 8.70  | MB16-18          | Lava?        | 40Ar/39Ar      | Whole rock         | This study                                                                                              |
| 60.70 | -135.03 | 8.70  | 94CH-1-3         | Volcanic     | K/Ar           | Whole Rock         | Hart, C.J.R. and Villeneuve, M., 1999, Canadian Journal of Earth Sciences, v. 36, p. 1495 1507.         |
| 61.65 | -142.70 | 8.72  | BK1-654          | Lava         | 40/39 Plateau  | Groundmass         | Trop et al., 2012, Geosphere, v. 8, p. 805-834.                                                         |
| 61.78 | -141.83 | 8.80  | 3                | Andesite     | K/Ar           | Whole rock         | Denton and Armstrong, 1969, American Journal of Science, v. 267, p. 1121-1142.                          |
| 60.64 | -135.03 | 8.80  | Y88-20           | Volcanic     | K/Ar           | Whole Rock         | Hart, C.J.R. and Villeneuve, M. 1999. Canadian Journal of Earth Sciences 36 1495 1507.                  |
| 61.46 | -141.15 | 8.82  | 122LA            | Lava?        | 40Ar/39Ar      | Whole rock         | This study                                                                                              |
| 61.58 | -142.24 | 8.87  | 81ASJ36          | Dacite       | K/Ar           | Whole rock         | Richter et al., 1990, Bulletin of Volcanology, v. 53, p. 29-44.                                         |
| 60.70 | -135.04 | 8.90  | TMH-2            | Volcanic     | K/Ar           | Whole Rock         | Hart, C.J.R. and Villeneuve, M. 1999. Canadian Journal of Earth Sciences 36 1495 1507.                  |
| 61.58 | -142.24 | 8.98  | 81ASJ36          | Dacite       | K/Ar           | Whole rock         | Richter et al., 1990, Bulletin of Volcanology, v. 53, p. 29-44.                                         |
| 61.14 | -140.23 | 9.20  | 32-Cac-74-1      | Plutonic     | K/Ar           | Biotite            | Dodds, C.J. and Campbell, R.B., 1988, Geological Survey of Canada Paper 87-16.                          |
| 61.49 | -141.23 | 9.33  | 123LA-B          | Lava?        | 40Ar/39Ar      | Whole rock         | This study                                                                                              |
| 62.02 | -142.80 | 9.40  | 74AMS14          | Dacite       | K/Ar           | Plagioclase        | Silberman and others, 1977; Richter and others, 1990; Trop and others, 2012                             |
| 62.07 | -142.96 | 9.44  | 81ASJ43          | Dacite       | K/Ar           | Hornblende         | Richter et al., 1990, Bulletin of Volcanology, v. 53, p. 29-44.                                         |
| 61.69 | -142.16 | 9.45  | FDN-8            | Lava         | 40/39 Isochron | Plagioclase        | Trop et al., 2012, Geosphere, v. , 8, p. 805-834.                                                       |
| 61.71 | -142.52 | 9.62  | CHM-4            | Lava         | 40/39 Isochron | Plagioclase        | Trop et al., 2012, Geosphere, v. , 8, p. 805-834.                                                       |
| 61.72 | -142.48 | 9.64  | CHM-39           | Lava         | 40/39 Plateau  | Plagioclase        | Trop et al., 2012, Geosphere, v. , 8, p. 805-834.                                                       |
| 62.00 | -141.81 | 9.70  | 0629160 (MB16-2) | Lava         | 40Ar/39Ar      | Whole rock         | Brueseke and others, 2019, Terra Nova, v. 31, p. 59-66.                                                 |
| 61.61 | -142.11 | 9.74  | SKO-28A          | Lava         | 40/39 Isochron | Plagioclase        | Trop et al., 2012, Geosphere, v. , 8, p. 805-834.                                                       |
| 61.65 | -142.01 | 9.82  | 81ASJ12          | Andesite     | K/Ar           | Whole rock         | Richter et al., 1990, Bulletin of Volcanology, v. 53, p. 29-44.                                         |
| 61.65 | -142.01 | 9.83  | 81ASJ12          | Andesite     | K/Ar           | Whole rock         | Richter et al., 1990, Bulletin of Volcanology, v. 53, p. 29-44.                                         |
| 61.30 | -140.12 | 9.90  | SE-36-57-74      | Volcanic     | K/Ar           | Whole Rock         | Souther, J.G. and Armstrong, R.L. 1974. Unpublished data.                                               |
| 61.69 | -142.16 | 9.93  | FDN-3            | Lava         | 40/39 Plateau  | Groundmass         | Trop et al., 2012, Geosphere, v. , 8, p. 805-834.                                                       |
| 61.49 | -141.23 | 10.00 | 123LA-A          | Lava         | 40Ar/39Ar      | Whole rock         | Brueseke and others, 2019, Terra Nova, v. 31, p. 59-66.                                                 |
| 61.78 | -141.83 | 10.00 | 4                | Andesite     | K/Ar           | Whole rock         | Denton and Armstrong, 1969, American Journal of Science, v. 267, p. 1121-1142.                          |
| 61.62 | -142.02 | 10.02 | SKO-3            | Lava         | 40/39 Plateau  | Groundmass         | Trop et al., 2012, Geosphere, v. 8, p. 805-834.                                                         |
| 61.47 | -141.04 | 10.20 | 108LA            | Lava         | 40Ar/39Ar      | Whole rock         | Brueseke et al., 2019, Terra Nova, v. 31, p. 59-66.                                                     |
| 61.78 | -141.84 | 10.20 | 2                | Andesite     | K/Ar           | Whole rock         | Denton and Armstrong, 1969, American Journal of Science, v. 267, p. 1121-1142.                          |
| 61.94 | -141.84 | 10.40 | 82LA             | Lava         | 40Ar/39Ar      | Whole rock         | Brueseke et al., 2019, Terra Nova, v. 31, p. 59-66.                                                     |
| 61.78 | -141.83 | 10.40 | 1                | Andesite     | K/Ar           | Whole rock         | Denton and Armstrong, 1969, American Journal of Science, v. 267, p. 1121-1142.                          |
| 61.40 | -140.34 | 10.47 | TS-186-85        | Volcanic     | Ar/Ar          | Whole Rock         | Skulski et al., 1992, Canadian Journal of Earth Sciences, v. 29, p. 446-461.                            |
| 61.99 | -141.82 | 10.80 | 70LA             | Lava         | 40Ar/39Ar      | Whole rock         | Brueseke et al., 2019, Terra Nova, v. 31, p. 59-66.                                                     |
| 60.67 | -138.09 | 10.80 | WN-128-74        | Volcanic     | K/Ar           | Whole Rock         | Stevens et al., 1982, Geological Survey of Canada, Paper 82-2, p. 1-56.                                 |
| 61.60 | -144.81 | 10.81 | 84ANK 148d       | Blueschist   | K/Ar           | Whole rock         | Plafker et al., 1989, Journal of Geophysical Research, v. 94, p. 4255-4295                              |
| 61.52 | -142.39 | 10.95 | 57-6877          | Lava         | 40/39 Plateau  | Groundmass         | Trop et al., 2012, Geosphere, v. , 8, p. 805-834.                                                       |
| 61.42 | -140.36 | 11.08 | TS-155-85        | Volcanic     | Ar/Ar          | Whole Rock         | Skulski et al., 1992, Canadian Journal of Earth Sciences, v. 29, p. 446-461.                            |
| 61.57 | -142.34 | 11.10 | DBT-207          | Tuff         | SHRIMP         | Zircon             | Trop et al., 2012, Geosphere, v. 8, p. 805-834.                                                         |
| 61.69 | -142.17 | 11.20 | FDN-109          | Tuff         | SHRIMP         | Zircon             | Trop et al., 2012, Geosphere, v. 8, p. 805-834.                                                         |
| 61.34 | -139.95 | 11.40 | SE-25-46-73      | Volcanic     | K/Ar           | Whole Rock         | Souther, J.G. and Armstrong, R.L., 1974, Unpublished data.                                              |
| 61.47 | -141.18 | 12.60 | 117LA            | Lava         | 40Ar/39Ar      | Whole rock         | Brueseke et al., 2019, Terra Nova, v. 31, p. 59-66.                                                     |
| 61.35 | -140.27 | 13.09 | TS-153-86        | Volcanic     | Ar/Ar          | Whole rock         | Skulski et al., 1992, Canadian Journal of Earth Sciences, v. 29, p. 446-461.                            |
| 60.67 | -138.09 | 13.10 | WN-128-74        | Volcanic     | K/Ar           | Whole Rock         | Stevens et al., 1982, Geological Survey of Canada, Paper 82-2.                                          |
| 61.20 | -138.92 | 13.30 | 38-MD-1          | Plutonic     | K/Ar           | Biotite            | Downey et al., 1980, Current Research, Part B, Geological Survey of Canada, Paper 80-18, p. 189-193.    |
| 60.59 | -138.21 | 13.50 | WN-130-74        | Volcanic     | K/Ar           | Whole Rock         | Stevens et al., 1982, Geological Survey of Canada, Paper 82-2.                                          |
| 61.42 | -139.86 | 13.60 | WN-122-74        | Plutonic     | K/Ar           | Whole Rock         | Stevens et al., 1982, Geological Survey of Canada, Paper 82-2.                                          |
| 61.29 | -140.12 | 13.60 | SE-3609-74       | Volcanic     | K/Ar           | Whole Rock         | Souther, J.G. and Armstrong, R.L., 1974, Unpublished data.                                              |
| 62.30 | -143.05 | 13.90 | WAIT1            | Basalt       | K/Ar           | Whole rock         | Deininger, J.W., 1972, MS thesis, University of Alaska.                                                 |
| 61.20 | -139.02 | 14.60 | WN-125-74        | Plutonic     | K/Ar           | Whole Rock         | Stevens et al., 1982, Geological Survey of Canada, Paper 82-2.                                          |

|       |         |       |                  |                        |               |             |                                                                                              |
|-------|---------|-------|------------------|------------------------|---------------|-------------|----------------------------------------------------------------------------------------------|
| 61.42 | -142.80 | 15.20 | 74AMS14          | Dacite                 | K/Ar          | Hornblende  | Silberman et al., 1977, U.S.G.S. Circular 75, B56-B58.                                       |
| 61.28 | -139.56 | 15.45 | 09-RC-151        | Plutonic               | U/Pb          | Zircon      | Yukon Geological Survey Geochronological Database                                            |
| 61.20 | -139.18 | 15.50 | WN-126-74        | Plutonic               | K/Ar          | Whole Rock  | Stevens et al., 1982, Geological Survey of Canada, Paper 82-2.                               |
| 61.29 | -139.55 | 15.90 | 08-RC-106-2      | Plutonic               | U/Pb          | Zircon      | Yukon Geological Survey Geochronological Database                                            |
| 61.47 | -140.49 | 16.11 | TS-235-86        | Volcanic               | Ar/Ar         | Whole Rock  | Skulski et al., 1992, Canadian Journal of Earth Sciences, v. 29, p. 446-461.                 |
| 61.20 | -139.18 | 16.30 | WN-127-74        | Plutonic               | K/Ar          | Whole Rock  | Stevens et al., 1982, Geological Survey of Canada, Paper 82-2.                               |
| 61.20 | -138.92 | 16.31 | 05-AT-106-1      | Plutonic               | U/Pb          | Zircon      | Yukon Geological Survey Geochronological Database                                            |
| 61.43 | -139.91 | 16.31 | TS-192-85        | Volcanic               | Ar/Ar         | Whole Rock  | Skulski et al., 1992, Canadian Journal of Earth Sciences, v. 29, p. 446-461.                 |
| 62.27 | -142.86 | 16.84 | Bond Fine (HO)   | Porphyry               | 40Ar/39Ar     | Hornblende  | This study                                                                                   |
| 64.05 | -140.74 | 17.20 | M-263            | Volcanic               | K/Ar          | Whole Rock  | Hunt, P.A., and Roddick, J.C., 1991, Geological Survey of Canada, Paper 90-2, p. 113-143.    |
| 61.32 | -139.93 | 17.30 | SE-240-5A-73     | Volcanic               | K/Ar          | Whole Rock  | Souther, J.G. and Armstrong, R.L., 1974, unpublished data.                                   |
| 61.76 | -141.83 | 17.88 | MB16-13          | Lava?                  | 40Ar/39Ar     | Whole rock  | This study                                                                                   |
| 61.42 | -139.90 | 17.92 | TS-12-85         | Volcanic               | Ar/Ar         | Whole Rock  | Skulski et al. 1992, Canadian Journal of Earth Sciences, v. 29, p. 446-461.                  |
| 62.21 | -141.20 | 18.00 | 71PCL163         | Pegmatite              | 40/39         | Biotite     | Richter, 1976, U.S.G.S. Misc. Investigations Series Map 1-932.                               |
| 62.27 | -142.86 | 18.02 | Bond Fine (WR)   | Porphyry               | 40Ar/39Ar     | Whole rock  | This study                                                                                   |
| 61.89 | -141.27 | 18.50 | SB-28            | Vitrophyre             | 40Ar/39Ar     | Whole rock  | Berkelhammer et al., 2019, Geosphere, v. 15, p. 1508-1538.                                   |
| 61.82 | -141.34 | 18.60 | 81ASJ30          | Basalt                 | K/Ar          | Whole rock  | Richter et al., 1990, Bulletin of Volcanology, v. 53, p. 29-44.                              |
| 62.23 | -142.97 | 18.94 | 05LA             | Porphyry               | 40Ar/39Ar     | Whole rock  | This study                                                                                   |
| 62.27 | -142.86 | 19.00 | Bond Course (WR) | Porphyry               | 40Ar/39Ar     | Whole rock  | This study                                                                                   |
| 61.81 | -141.26 | 19.10 | SB-55            | Diorite                | 40Ar/39Ar     | Whole rock  | Berkelhammer et al., 2019, Geosphere, v. 15, p. 1508-1538.                                   |
| 61.82 | -141.34 | 19.10 | 81ASJ30          | Basalt                 | K/Ar          | Whole rock  | Richter et al., 1990, Bulletin of Volcanology, v. 53, p. 29-44.                              |
| 62.27 | -142.90 | 19.17 | Short (WR)       | Porphyry               | 40Ar/39Ar     | Whole rock  | This study                                                                                   |
| 61.81 | -141.26 | 19.20 | SB-54            | Andesite flow          | 40Ar/39Ar     | Whole rock  | Berkelhammer et al., 2019, Geosphere, v. 15, p. 1508-1538.                                   |
| 61.85 | -141.23 | 19.30 | SB-40            | Tuff                   | 40Ar/39Ar     | Whole rock  | Brueseke et al., 2019, Terra Nova, v. 31, p. 59-66.                                          |
| 62.27 | -142.90 | 19.59 | Short (HO)       | Porphyry               | 40Ar/39Ar     | Hornblende  | This study                                                                                   |
| 61.88 | -140.99 | 19.60 | 37LA             |                        | 40Ar/39Ar     | Whole rock  | Berkelhammer et al., 2019, Geosphere, v. 15, p. 1508-1538.                                   |
| 61.91 | -141.25 | 19.70 | SB15-18          |                        | 40Ar/39Ar     | Whole rock  | Berkelhammer et al., 2019, Geosphere, v. 15, p. 1508-1538.                                   |
| 61.85 | -141.23 | 19.70 | SB-41            | Dacite flow            | 40Ar/39Ar     | Whole rock  | Berkelhammer et al., 2019, Geosphere, v. 15, p. 1508-1538.                                   |
| 61.81 | -141.33 | 19.70 | SB-52            | Andesite flow          | 40Ar/39Ar     | Whole rock  | Berkelhammer et al., 2019, Geosphere, v. 15, p. 1508-1538.                                   |
| 64.38 | -140.50 | 19.74 | M-1077           | Volcanic               | Ar/Ar         | Whole Rock  | Mortensen, J.K. and Roddick, J.C., 1990, Geological Survey of Canada, Paper 89-2, p. 17-22.  |
| 62.27 | -142.90 | 19.78 | Short (PLAG)     | Porphyry               | 40Ar/39Ar     | Plagioclase | This study                                                                                   |
| 64.38 | -140.50 | 19.90 | M-1077           | Volcanic               | K/Ar          | Whole Rock  | Hunt, P.A., and Roddick, J.C., 1991, Geological Survey of Canada, Paper 90-2, p. 113-143.    |
| 61.93 | -141.25 | 20.00 | 81ASJ20          | Andesite               | K/Ar          | Whole rock  | Richter et al., 1990, Bulletin of Volcanology, v. 53, p. 29-44.                              |
| 61.20 | -139.18 | 20.00 | WN-126-74        | Plutonic               | K/Ar          | Biotite     | Stevens et al., 1982, Geological Survey of Canada, Paper 82-2, p. 1-56.                      |
| 61.81 | -141.33 | 20.20 | SB-51            | Andesite flow          | 40Ar/39Ar     | Whole rock  | Berkelhammer et al., 2019, Geosphere, v. 15, p. 1508-1538.                                   |
| 61.86 | -141.14 | 20.30 | SB-45            | Rhyodacite plug        | 40Ar/39Ar     | Whole rock  | Berkelhammer et al., 2019, Geosphere, v. 15, p. 1508-1538.                                   |
| 61.89 | -141.27 | 20.70 | SB-27            | Vitrophyre             | 40Ar/39Ar     | Whole rock  | Brueseke et al., 2019, Terra Nova, v. 31, p. 59-66.                                          |
| 62.27 | -142.86 | 20.74 | Bond Course (HO) | Porphyry               | 40Ar/39Ar     | Hornblende  | This study                                                                                   |
| 62.24 | -142.67 | 21.20 | EF-17            | Trondhjemite           | K/Ar          | Chlorite    | Silberman et al., 1977, U.S.G.S. Circular 75, B56-B58.                                       |
| 61.86 | -141.07 | 21.30 | 46LA             |                        | 40Ar/39Ar     | Whole rock  | Berkelhammer et al., 2019, Geosphere, v. 15, p. 1508-1538.                                   |
| 61.89 | -141.27 | 21.30 | SB-29            | Andesite lava          | 40Ar/39Ar     | Whole rock  | Berkelhammer et al., 2019, Geosphere, v. 15, p. 1508-1538.                                   |
| 61.81 | -141.33 | 21.30 | SB-53            | Andesite flow?         | 40Ar/39Ar     | Whole rock  | Berkelhammer et al., 2019, Geosphere, v. 15, p. 1508-1538.                                   |
| 61.91 | -141.26 | 21.30 | SB-17            | Andesite lava          | 40Ar/39Ar     | Whole rock  | Brueseke et al., 2019, Terra Nova, v. 31, p. 59-66.                                          |
| 62.20 | -142.72 | 21.30 | BC-26            | Granodiorite           | K/Ar          | Muscovite   | Silberman et al., 1977, U.S.G.S. Circular 75, B56-B58.                                       |
| 61.89 | -141.02 | 21.40 | 49LA             | Dacite lava?           | 40Ar/39Ar     | Whole rock  | Brueseke et al., 2019, Terra Nova, v. 31, p. 59-66.                                          |
| 61.89 | -141.02 | 21.40 | MB-18            | Basalt lava            | 40Ar/39Ar     | Whole rock  | Brueseke et al., 2019, Terra Nova, v. 31, p. 59-66.                                          |
| 61.86 | -141.14 | 21.45 | SB-45 (BI)       | Lava                   | 40Ar/39Ar     | Biotite     | This study                                                                                   |
| 61.90 | -141.26 | 21.50 | SB-25            | Andesite lava          | 40Ar/39Ar     | Whole rock  | Brueseke et al., 2019, Terra Nova, v. 31, p. 59-66.                                          |
| 61.89 | -141.27 | 21.70 | SB-30            | Andesite lava          | 40Ar/39Ar     | Whole rock  | Berkelhammer et al., 2019, Geosphere, v. 15, p. 1508-1538.                                   |
| 61.89 | -141.27 | 21.70 | SB-31            | Andesite lava          | 40Ar/39Ar     | Whole rock  | Berkelhammer et al., 2019, Geosphere, v. 15, p. 1508-1538.                                   |
| 61.87 | -141.13 | 21.70 | SB-48            | Andesite flow          | 40Ar/39Ar     | Whole rock  | Berkelhammer et al., 2019, Geosphere, v. 15, p. 1508-1538.                                   |
| 61.89 | -141.27 | 22.00 | SB-32            | Basaltic andesite flow | 40Ar/39Ar     | Whole rock  | Brueseke et al., 2019, Terra Nova, v. 31, p. 59-66.                                          |
| 61.88 | -141.06 | 22.10 | 43LA             |                        | 40Ar/39Ar     | Whole rock  | Berkelhammer et al., 2019, Geosphere, v. 15, p. 1508-1538.                                   |
| 61.91 | -141.25 | 22.10 | SB15-20          |                        | 40Ar/39Ar     | Whole rock  | Berkelhammer et al., 2019, Geosphere, v. 15, p. 1508-1538.                                   |
| 61.90 | -141.26 | 22.10 | SB-24            | Lava                   | 40Ar/39Ar     | Whole rock  | Berkelhammer et al., 2019, Geosphere, v. 15, p. 1508-1538.                                   |
| 62.24 | -142.68 | 22.10 | EF-7             | Granodiorite           | K/Ar          | Muscovite   | Silberman et al., 1977, U.S.G.S. Circular 75, B56-B58.                                       |
| 61.87 | -141.12 | 22.20 | SB-47            | Diorite                | 40Ar/39Ar     | Whole rock  | Berkelhammer et al., 2019, Geosphere, v. 15, p. 1508-1538.                                   |
| 62.24 | -142.68 | 22.20 | EF-2             | Granodiorite           | K/Ar          | Biotite     | Silberman et al., 1977, U.S.G.S. Circular 75, B56-B58.                                       |
| 61.88 | -141.03 | 22.30 | 32LA             |                        | 40Ar/39Ar     | Whole rock  | Berkelhammer et al., 2019, Geosphere, v. 15, p. 1508-1538.                                   |
| 61.88 | -141.03 | 22.40 | 32LA(PLAG)       | Lava?                  | 40Ar/39Ar     | Plagioclase | This study                                                                                   |
| 61.91 | -141.26 | 22.50 | SB-23            | Lava                   | 40Ar/39Ar     | Whole rock  | Berkelhammer et al., 2019, Geosphere, v. 15, p. 1508-1538.                                   |
| 61.91 | -141.05 | 22.60 | 20LA             |                        | 40Ar/39Ar     | Whole rock  | Berkelhammer et al., 2019, Geosphere, v. 15, p. 1508-1538.                                   |
| 61.86 | -141.13 | 22.60 | SB-46            | Andesite flow?         | 40Ar/39Ar     | Whole rock  | Berkelhammer et al., 2019, Geosphere, v. 15, p. 1508-1538.                                   |
| 62.11 | -142.47 | 22.60 | 09LA             | Porphyry               | 40Ar/39Ar     | Whole rock  | This study                                                                                   |
| 62.24 | -142.59 | 22.70 | 33TOT            | Porphyry               | 40Ar/39Ar     | Whole rock  | Brueseke et al., 2019, Terra Nova, v. 31, p. 59-66.                                          |
| 61.87 | -141.02 | 22.90 | 27LA             |                        | 40Ar/39Ar     | Whole rock  | Berkelhammer et al., 2019, Geosphere, v. 15, p. 1508-1538.                                   |
| 61.81 | -141.23 | 22.90 | SB-56            | Diorite                | 40Ar/39Ar     | Whole rock  | Brueseke et al., 2019, Terra Nova, v. 31, p. 59-66.                                          |
| 61.86 | -141.14 | 23.00 | SB-43            | Rhyo-dacite flow       | 40Ar/39Ar     | Whole rock  | Berkelhammer et al., 2019, Geosphere, v. 15, p. 1508-1538.                                   |
| 61.64 | -144.62 | 23.05 | 84ANK 152a       | Blueschist             | K/Ar          | Whole rock  | Blafker et al., 1989, Journal of Geophysical Research, v. 94, p. 4255-4295                   |
| 61.87 | -141.03 | 23.18 | 28LA             | Porphyry               | 40Ar/39Ar     | Whole rock  | This study                                                                                   |
| 61.87 | -141.03 | 23.20 | 28LA (PLAG)      |                        | 40Ar/39Ar     | Whole rock  | Berkelhammer et al., 2019, Geosphere, v. 15, p. 1508-1538.                                   |
| 61.87 | -141.03 | 23.20 | 39LA             |                        | 40Ar/39Ar     | Whole rock  | Berkelhammer et al., 2019, Geosphere, v. 15, p. 1508-1538.                                   |
| 61.88 | -140.99 | 23.26 | 38LA             | Rhyolite flow          | 40Ar/39Ar     | Whole rock  | This study                                                                                   |
| 61.88 | -140.99 | 23.30 | 38LA (BI)        |                        | 40Ar/39Ar     | Biotite     | Berkelhammer et al., 2019, Geosphere, v. 15, p. 1508-1538.                                   |
| 61.91 | -141.25 | 23.30 | SB15-19          |                        | 40Ar/39Ar     | Whole rock  | Berkelhammer et al., 2019, Geosphere, v. 15, p. 1508-1538.                                   |
| 61.93 | -141.26 | 23.30 | 84ARh70          | Dacite                 | K/Ar          | Hornblende  | Richter et al., 1990, Bulletin of Volcanology, v. 53, p. 29-44.                              |
| 61.88 | -141.03 | 23.40 | 31LA             |                        | 40Ar/39Ar     | Whole rock  | Berkelhammer et al., 2019, Geosphere, v. 15, p. 1508-1538.                                   |
| 61.85 | -141.07 | 23.40 | 45LA             |                        | 40Ar/39Ar     | Whole rock  | Berkelhammer et al., 2019, Geosphere, v. 15, p. 1508-1538.                                   |
| 61.88 | -141.05 | 23.50 | 41LA             |                        | 40Ar/39Ar     | Whole rock  | Berkelhammer et al., 2019, Geosphere, v. 15, p. 1508-1538.                                   |
| 61.55 | -133.63 | 23.50 | TJ889-32-5       | Plutonic               | K/Ar          | Whole Rock  | Bremner, T., 1991, Yukon Geology 1990, Yukon, Indian and Northern Affairs Canada , p. 60-64. |
| 61.90 | -141.14 | 23.70 | SB-36            | Dike                   | 40Ar/39Ar     | Whole rock  | Berkelhammer et al., 2019, Geosphere, v. 15, p. 1508-1538.                                   |
| 61.90 | -141.14 | 23.90 | SB-34            | Rhyolite lava          | 40Ar/39Ar     | Whole rock  | Berkelhammer et al., 2019, Geosphere, v. 15, p. 1508-1538.                                   |
| 62.22 | -142.51 | 24.00 | 31TOT            | Porphyry               | 40Ar/39Ar     | Whole rock  | Berkelhammer et al., 2019, Geosphere, v. 15, p. 1508-1538.                                   |
| 61.89 | -141.02 | 24.10 | 15LA             |                        | 40Ar/39Ar     | Whole rock  | Berkelhammer et al., 2019, Geosphere, v. 15, p. 1508-1538.                                   |
| 62.24 | -142.53 | 24.10 | 32TOT            | Porphyry               | 40Ar/39Ar     | Whole rock  | Brueseke et al., 2019, Terra Nova, v. 31, p. 59-66.                                          |
| 61.99 | -141.81 | 24.41 | 67LA (BI)        | Lava?                  | 40Ar/39Ar     | Biotite     | This study                                                                                   |
| 61.87 | -141.03 | 24.50 | 30LA             |                        | 40Ar/39Ar     | Whole rock  | Berkelhammer et al., 2019, Geosphere, v. 15, p. 1508-1538.                                   |
| 61.86 | -141.21 | 24.60 | SB-39            | Andesite lava          | 40Ar/39Ar     | Whole rock  | Berkelhammer et al., 2019, Geosphere, v. 15, p. 1508-1538.                                   |
| 62.22 | -142.52 | 24.70 | 20TOT            | Porphyry               | 40Ar/39Ar     | Whole rock  | Brueseke et al., 2019, Terra Nova, v. 31, p. 59-66.                                          |
| 61.90 | -141.02 | 24.80 | 16LA             |                        | 40Ar/39Ar     | Whole rock  | Berkelhammer et al., 2019, Geosphere, v. 15, p. 1508-1538.                                   |
| 62.11 | -142.47 | 24.82 | 09LA (HO)        | Porphyry               | 40Ar/39Ar     | Hornblende  | This study                                                                                   |
| 62.22 | -142.52 | 24.90 | 17TOT            | Porphyry               | 40Ar/39Ar     | Whole rock  | Brueseke et al., 2019, Terra Nova, v. 31, p. 59-66.                                          |
| 61.81 | -141.33 | 25.30 | SB-50            | Andesite dike          | 40Ar/39Ar     | Whole rock  | Berkelhammer et al., 2019, Geosphere, v. 15, p. 1508-1538.                                   |
| 61.86 | -141.14 | 25.60 | SB-44            | Tuff                   | 40Ar/39Ar     | Whole rock  | Brueseke et al., 2019, Terra Nova, v. 31, p. 59-66.                                          |
| 61.90 | -141.02 | 25.90 | 17LA             | Dacite lava?           | 40Ar/39Ar     | Whole rock  | Berkelhammer et al., 2019, Geosphere, v. 15, p. 1508-1538.                                   |
| 61.87 | -141.04 | 26.00 | 40LA             | Basalt lava            | 40Ar/39Ar     | Whole rock  | Berkelhammer et al., 2019, Geosphere, v. 15, p. 1508-1538.                                   |
| 61.88 | -141.03 | 26.00 | 33LA             | Basalt lava            | 40Ar/39Ar     | Whole rock  | Brueseke et al., 2019, Terra Nova, v. 31, p. 59-66.                                          |
| 61.88 | -141.00 | 26.20 | 26LA             | Basalt Lava            | 40Ar/39Ar     | Whole rock  | Brueseke et al., 2019, Terra Nova, v. 31, p. 59-66.                                          |
| 61.79 | -140.88 | 26.27 | 10-SI-054-1      | Plutonic               | U/Pb          | Zircon      |                                                                                              |
| 61.89 | -141.04 | 26.30 | 85ARA47A         | Basalt                 | K/Ar          | Whole rock  | Richter et al., 1990, Bulletin of Volcanology, v. 53, p. 29-44.                              |
| 61.37 | -139.31 | 26.50 | PC1              | Plutonic               | K/Ar          | Biotite     | Christopher et al., 1972, Canadian Journal of Earth Sciences, v. 9, p. 918-921.              |
| 61.38 | -139.44 | 26.50 | PC4              | Plutonic               | K/Ar          | Biotite     | Christopher et al., 1972, Canadian Journal of Earth Sciences, v. 9, p. 918-921.              |
| 61.89 | -141.02 | 26.58 | 34LA             | Rhyolite               | 40Ar/39Ar     | Whole rock  | Berkelhammer et al., 2019, Geosphere, v. 15, p. 1508-1538.                                   |
| 61.38 | -139.43 | 26.70 | PC3              | Plutonic               | K/Ar          | Biotite     | Christopher et al., 1972, Canadian Journal of Earth Sciences, v. 9, p. 918-921.              |
| 61.38 | -139.44 | 26.70 | CKD-1            | Plutonic               | K/Ar          | Biotite     | Christopher, P.A., 1973, Canadian Journal of Earth Sciences, v. 10, p. 846-851.              |
| 61.37 | -139.43 | 26.90 | W145             | Plutonic               | K/Ar          | Biotite     | Farrar et al., 1988, Isochron/west, v. 51, p. 19-23.                                         |
| 61.86 | -141.06 | 27.00 | 47LA             | Basalt lava            | 40Ar/39Ar     | Whole rock  | Brueseke et al., 2019, Terra Nova, v. 31, p. 59-66.                                          |
| 61.86 | -141.06 | 27.00 | MB-15            | Basalt lava            | 40Ar/39Ar     | Whole rock  | Brueseke et al., 2019, Terra Nova, v. 31, p. 59-66.                                          |
| 60.71 | -140.51 | 27.10 | 5066             | Plutonic               | Fission Track | Zircon      | Parrish, R.R., 1981, EOS Transactions of the American Geophysical Union 62 60 0.             |
| 61.88 | -141.05 | 27.20 | 42LA             | Basalt lava            | 40Ar/39Ar     | Whole rock  | Brueseke et al., 2019, Terra Nova, v. 31, p. 59-66.                                          |
| 61.88 | -141.05 | 27.20 | Eucre            | ??? Porphyry           | 40Ar/39Ar     | Whole rock  | Brueseke et al., 2019, Terra Nova, v. 31, p. 59-66.                                          |
| 61.37 | -139.30 | 27.20 | PC2              | Plutonic               | K/Ar          | Biotite     | Christopher et al., 1972, Canadian Journal of Earth Sciences, v. 9, p. 918-921.              |
| 61.37 | -139.31 | 27.20 | 04-SIS-159       | Plutonic               | U/Pb          | Zircon      | Yukon Geological Survey Geochronological Database                                            |

|       |         |       |               |                 |               |            |                                                                                                   |
|-------|---------|-------|---------------|-----------------|---------------|------------|---------------------------------------------------------------------------------------------------|
| 61.99 | -141.81 | 27.40 | 67LA          | Lava            | 40Ar/39Ar     | Whole rock | Brueseke et al., 2019, Terra Nova, v. 31, p. 59-66.                                               |
| 61.91 | -141.05 | 27.50 | 20LATUFF      | Tuff            | 40Ar/39Ar     | Whole rock | Berkelhammer et al., 2019, Geosphere, v. 15, p. 1508-1538.                                        |
| 61.89 | -141.02 | 27.50 | 35LA          | Basalt lava     | 40Ar/39Ar     | Whole rock | Brueseke et al., 2019, Terra Nova, v. 31, p. 59-66.                                               |
| 61.91 | -141.05 | 27.86 | 20LATUFF (BI) | Dacite tuff     | 40Ar/39Ar     | Biotite    | This study                                                                                        |
| 61.89 | -141.14 | 28.00 | SB-37         | Basalt plug     | 40Ar/39Ar     | Whole rock | Berkelhammer et al., 2019, Geosphere, v. 15, p. 1508-1538.                                        |
| 61.03 | -138.77 | 28.40 | 289-CAd-74-1  | Volcanic        | K/Ar          | Biotite    | Dodds, C.J. and Campbell, R.B., 1988, Geological Survey of Canada Paper 87-16 .                   |
| 61.89 | -141.15 | 29.00 | SB-33         | Dacite porphyry | 40Ar/39Ar     | Whole rock | Brueseke et al., 2019, Terra Nova, v. 31, p. 59-66.                                               |
| 62.01 | -142.32 | 29.22 | 55LA(HO)      | Porphyry        | 40Ar/39Ar     | Hornblende | This study                                                                                        |
| 62.13 | -142.35 | 29.70 | 10LA          | Felsic Dike     | 40Ar/39Ar     | Whole rock | Brueseke et al., 2019, Terra Nova, v. 31, p. 59-66.                                               |
| 60.62 | -140.72 | 29.90 | 3290          | Plutonic        | Fission Track | Zircon     | O'Sullivan, P.B. and Currie, L.D., 1996, Earth and Planetary Science Letters, v. 144, p. 251-261. |
| 61.90 | -141.09 | 30.30 | Minivolcano   | Volcanic        | 40Ar/39Ar     | Whole rock | Berkelhammer et al., 2019, Geosphere, v. 15, p. 1508-1538.                                        |
| 60.63 | -140.66 | 30.70 | 5645          | Plutonic        | Fission Track | Zircon     | Parrish, R.R., 1981, Unpublished,                                                                 |
| 60.58 | -140.43 | 33.10 | 5880          | Plutonic        | Fission Track | Zircon     | Parrish, R.R., 1981, EOS Transactions of the American Geophysical Union, 62 60 O.                 |

**Note:**  
Richter et al. (1990) recalculated ages reported prior to 1990 using updated standards; the updated age is reported here along with the original reference
