# Supplementary material
Source: publisher figshare collection journal article supplement (https://gsapubs.figshare.com/articles/dataset/_/15167367)
Supplement: Supplementary file 8 [file 1 › GS2471_SuppItemS9.pdf]

**Supplemental Item S9 - Detrital volcanic-lithic <sup>40</sup>Ar/<sup>39</sup>Ar (DARL) fusion ages from cobbles sampled from modern rivers, Wrangell Arc, Wrangell-St. Elias Mountains, Alaska-Canada**

**WRANGELL CLASTS WR 11-15A16 #1-#20**

Weighted average of J from standards = 1.078e-04 +/- 7.437e-07

| Weighted average of J from standards = 1.078e-04 +/- 7.437e-07 |         |           |          |           |         |           |         |           |         |         |         |         |         |           | Fusion Age |          |      |          |
|----------------------------------------------------------------|---------|-----------|----------|-----------|---------|-----------|---------|-----------|---------|---------|---------|---------|---------|-----------|------------|----------|------|----------|
| Sample name                                                    | River   | 40Ar/39Ar |          | 37Ar/39Ar |         | 36Ar/39Ar |         | % Atm.    | Ca/K    |         | Cl/K    | 40*/39K | Age     |           | Volts      | # Grains |      |          |
|                                                                |         | meas.     | +/-      | meas.     | +/-     | meas.     | +/-     | 40Ar      | +/-     | +/-     | +/-     | (Ma)    | (Ma)    |           |            |          |      |          |
| Sanford-1                                                      | Sanford | 190.24506 | 1.42275  | 2.92455   | 0.03842 | 0.64331   | 0.00737 | 99.81225  | 0.90466 | 5.37726 | 0.07079 | 0.03259 | 0.00072 | 0.35786   | 1.72449    | 0.07     | 0.34 | 1.27694  |
| Sanford-2                                                      | Sanford | 474.44504 | 2.9396   | 3.66183   | 0.02759 | 1.56649   | 0.01461 | 97.5088   | 0.68868 | 6.73637 | 0.05089 | 0.04069 | 0.00111 | 11.8493   | 3.27748    | 2.3      | 0.64 | 4.32151  |
| Sanford-3                                                      | Sanford | 9.80232   | 0.0663   | 1.19182   | 0.01542 | 0.01103   | 0.0009  | 32.34029  | 2.7136  | 2.18867 | 0.02834 | 0.00157 | 0.00019 | 6.61771   | 0.26946    | 1.29     | 0.05 | 0.16231  |
| Sanford-4                                                      | Sanford | 22.94593  | 0.14523  | 2.13695   | 0.0207  | 0.06367   | 0.00258 | 81.3316   | 3.29846 | 3.92694 | 0.0381  | 0.03606 | 0.00072 | 4.28457   | 0.7583     | 0.83     | 0.15 | 0.18247  |
| Sanford-5                                                      | Sanford | 309.03765 | 1.85316  | 1.10757   | 0.01097 | 1.01653   | 0.01233 | 97.17963  | 1.03081 | 2.03382 | 0.02015 | 0.01054 | 0.00072 | 8.72199   | 3.1887     | 1.69     | 0.62 | 5.30757  |
| Sanford-6                                                      | Sanford | 35.90542  | 0.17633  | 2.18353   | 0.021   | 0.11177   | 0.00314 | 91.56216  | 2.56342 | 4.01266 | 0.03865 | 0.04243 | 0.00071 | 3.03181   | 0.92168    | 0.59     | 0.18 | 0.43554  |
| Sanford-7                                                      | Sanford | 99.9231   | 0.72665  | 3.01112   | 0.03403 | 0.32678   | 0.0065  | 96.41762  | 1.81265 | 5.53677 | 0.06271 | 0.02536 | 0.00077 | 3.58619   | 1.81564    | 0.7      | 0.35 | 1.01792  |
| Sanford-8                                                      | Sanford | 133.15242 | 0.79688  | 2.30525   | 0.02551 | 0.44521   | 0.00431 | 98.68208  | 0.79145 | 4.23672 | 0.04696 | 0.02721 | 0.00084 | 1.75731   | 1.05606    | 0.34     | 0.21 | 1.1568   |
| Sanford-9                                                      | Sanford | 61.88664  | 0.19401  | 1.43882   | 0.01476 | 0.20034   | 0.00278 | 95.51462  | 1.31083 | 2.64271 | 0.02714 | 0.02561 | 0.00049 | 2.77734   | 0.81226    | 0.54     | 0.16 | 0.89048  |
| Sanford-11                                                     | Sanford | 12.14767  | 0.09725  | 1.82546   | 0.0192  | 0.02994   | 0.00178 | 71.7742   | 4.30805 | 3.35378 | 0.03533 | 0.03076 | 0.00065 | 3.42482   | 0.5238     | 0.67     | 0.1  | 0.15313  |
| Sanford-12                                                     | Sanford | 124.12094 | 0.5373   | 3.13183   | 0.02584 | 0.42734   | 0.00689 | 101.55389 | 1.59387 | 5.75921 | 0.04762 | 0.03882 | 0.00087 | -1.93252  | 1.98202    | -0.38    | 0.39 | 0.95548  |
| Sanford-13                                                     | Sanford | 7.647     | 0.0683   | 0.76803   | 0.0088  | 0.02184   | 0.00141 | 83.88592  | 5.43611 | 1.41    | 0.01617 | 0.02838 | 0.00057 | 1.22813   | 0.41458    | 0.24     | 0.08 | 0.09928  |
| Sanford-14                                                     | Sanford | 8.5552    | 0.04123  | 0.94501   | 0.00757 | 0.0222    | 0.00088 | 76.03023  | 3.05522 | 1.73512 | 0.01391 | 0.01876 | 0.0003  | 2.04491   | 0.26118    | 0.4      | 0.05 | 0.17553  |
| Sanford-15                                                     | Sanford | 9.54933   | 0.05106  | 0.91126   | 0.00692 | 0.02638   | 0.00228 | 81.11168  | 7.06685 | 1.67311 | 0.01272 | 0.00125 | 0.00033 | 1.79926   | 0.67357    | 0.35     | 0.13 | 0.10264  |
| Sanford-16                                                     | Sanford | 5.48224   | 0.02381  | 0.25876   | 0.00492 | 0.0088    | 0.00064 | 47.31931  | 3.4609  | 0.47488 | 0.00903 | 0.00146 | 0.00014 | 2.87296   | 0.18939    | 0.56     | 0.04 | 0.15914  |
| Sanford-17                                                     | Sanford | 39.47992  | 0.2645   | 1.2515    | 0.01599 | 0.10839   | 0.00274 | 80.92777  | 1.99157 | 2.29837 | 0.02939 | 0.00045 | 0.0003  | 7.5307    | 0.78936    | 1.46     | 0.15 | 0.48422  |
| Sanford-18                                                     | Sanford | 16.57983  | 0.05015  | 0.62914   | 0.0058  | 0.04506   | 0.00106 | 80.14606  | 1.88382 | 1.15491 | 0.01065 | 0.0011  | 0.00024 | 3.28732   | 0.31259    | 0.64     | 0.06 | 0.29535  |
| Sanford-19                                                     | Sanford | 12.28946  | 0.05761  | 0.26844   | 0.00409 | 0.03139   | 0.00143 | 75.46807  | 3.4255  | 0.49264 | 0.00751 | 0.001   | 0.00025 | 3.00813   | 0.42046    | 0.58     | 0.08 | 0.20716  |
| White-2                                                        | White   | 1522.1052 | 10.29774 | 1.2012    | 0.01941 | 0.23162   | 0.00343 | 4.49032   | 0.05949 | 2.2059  | 0.03567 | 0.00192 | 0.00055 | 1454.9637 | 9.8994     | 262.66   | 1.66 | 13.57914 |
| White-3                                                        | White   | 124.77588 | 0.87407  | 2.25165   | 0.02766 | 0.22239   | 0.0045  | 52.53056  | 1.01364 | 4.13805 | 0.05092 | 0.00324 | 0.00041 | 59.31065  | 1.3465     | 11.49    | 0.26 | 1.12433  |

**WRANGELL CLASTS WR 11-15A16 #21-#40**

Weighted average of J from standards = 1.052e-04 +/- 1.125e-06

| Weighted average of J from standards = 1.052e-04 +/- 1.125e-06 |         |           |          |           |         |           |         |          |         |          |         |         |         |           |          |          |      | *Step heat |      |      |      |
|----------------------------------------------------------------|---------|-----------|----------|-----------|---------|-----------|---------|----------|---------|----------|---------|---------|---------|-----------|----------|----------|------|------------|------|------|------|
| Sample name                                                    | River   | 40Ar/39Ar |          | 37Ar/39Ar |         | 36Ar/39Ar |         | % Atm.   |         | Ca/K     | Ct/K    | 40*/39K | Age     | +/-       | Volts    | # Grains | Age  | +/-        |      |      |      |
|                                                                |         | meas.     | +/-      | meas.     | +/-     | meas.     | +/-     | 40Ar     | +/-     |          |         |         |         |           |          |          |      |            | (Ma) | (Ma) | (Ma) |
| White-5                                                        | White   | 388.17008 | 3.66227  | 1.46783   | 0.02688 | 0.7729    | 0.01137 | 58.81139 | 0.66585 | 2.69605  | 0.04943 | 0.04511 | 0.00084 | 160.03552 | 3.00144  | 30.09    | 0.56 | 3.15986    | 2    | 23.5 | 0.7  |
| White-6                                                        | White   | 80.94422  | 0.50109  | 0.93931   | 0.01311 | 0.09075   | 0.00325 | 33.04571 | 1.17156 | 1.72465  | 0.02409 | 0.00285 | 0.00028 | 54.21171  | 1.0116   | 10.25    | 0.19 | 1.28646    | 2    |      |      |
| White-7                                                        | White   | 659.9611  | 6.78545  | 9.71461   | 0.12219 | 0.535     | 0.01215 | 23.83465 | 0.48729 | 17.9481  | 0.22732 | 0.00968 | 0.00086 | 506.11141 | 6.1839   | 93.48    | 1.11 | 2.6627     | 1    |      |      |
| White-8                                                        | White   | 153.21408 | 1.05457  | 2.13292   | 0.02755 | 0.29309   | 0.00506 | 56.42343 | 0.90252 | 3.91951  | 0.0507  | 0.00835 | 0.00048 | 66.85322  | 1.46847  | 12.63    | 0.28 | 1.40475    | 1    |      |      |
| White-11                                                       | White   | 96.86552  | 0.21333  | 0.07621   | 0.00309 | 0.16117   | 0.00208 | 49.1765  | 0.62634 | 0.13985  | 0.00567 | 0.00126 | 0.00016 | 49.218    | 0.61774  | 9.31     | 0.12 | 3.36341    | 1    | 10.4 | 0.2  |
| White-13                                                       | White   | 1869.8127 | 27.64165 | 11.73399  | 0.2045  | 0.53441   | 0.01351 | 8.39413  | 0.17328 | 21.71017 | 0.38153 | 0.00612 | 0.00198 | 1727.1436 | 25.95707 | 300.86   | 4.16 | 4.53643    | 1    |      |      |
| White-15                                                       | White   | 120.9263  | 0.55366  | 1.21191   | 0.01237 | 0.22761   | 0.00276 | 55.55057 | 0.63509 | 2.2256   | 0.02274 | 0.00163 | 0.00027 | 53.78389  | 0.81676  | 10.17    | 0.15 | 1.81501    | 1    |      |      |
| White-16                                                       | White   | 204.90748 | 0.85319  | 0.23992   | 0.00414 | 0.51585   | 0.00459 | 74.39233 | 0.58917 | 0.44029  | 0.0076  | 0.00647 | 0.0004  | 52.47332  | 1.22955  | 9.92     | 0.23 | 4.85341    | 1    |      |      |
| White-17                                                       | White   | 71.53709  | 0.25275  | 0.69943   | 0.00561 | 0.04824   | 0.00128 | 19.85264 | 0.52544 | 1.28399  | 0.01031 | 0.00466 | 0.00019 | 57.33962  | 0.42961  | 10.84    | 0.08 | 1.95735    | 1    |      |      |
| White-18                                                       | White   | 1866.799  | 11.97679 | 13.2691   | 0.1015  | 0.52868   | 0.00545 | 8.31017  | 0.06788 | 24.57728 | 0.18978 | 0.00499 | 0.00075 | 1727.8291 | 11.27181 | 300.97   | 1.81 | 15.76533   | 1    |      |      |
| Chisana-1                                                      | Chisana | 1404.8793 | 20.76302 | 23.45199  | 0.38065 | 3.83671   | 0.06573 | 80.56488 | 0.70312 | 43.75587 | 0.72216 | 0.02867 | 0.00262 | 277.63247 | 10.88827 | 51.88    | 2.01 | 4.45854    | 1    |      |      |
| Chisana-2                                                      | Chisana | 310.65447 | 4.73182  | 0.99199   | 0.02173 | 0.56057   | 0.01531 | 53.30099 | 1.21357 | 1.82144  | 0.03993 | 0.05124 | 0.00207 | 145.16039 | 4.38328  | 27.31    | 0.82 | 0.91524    | 1    | 22.9 | 0.3  |
| Chisana-3                                                      | Chisana | 253.15456 | 1.2965   | 0.79278   | 0.01239 | 0.40555   | 0.00463 | 47.31832 | 0.48544 | 1.45545  | 0.02276 | 0.01617 | 0.00071 | 133.42514 | 1.41151  | 25.12    | 0.26 | 3.18726    | 1    |      |      |
| Chisana-4                                                      | Chisana | 84.75545  | 0.32946  | 0.44931   | 0.0051  | 0.12577   | 0.00229 | 43.82123 | 0.7835  | 0.82469  | 0.00936 | 0.00409 | 0.00037 | 47.613    | 0.69413  | 9        | 0.13 | 1.36301    | 1    |      |      |
| Chisana-5                                                      | Chisana | 283.91627 | 1.06847  | 1.41561   | 0.01112 | 0.84757   | 0.00874 | 88.18269 | 0.85053 | 2.60005  | 0.02045 | 0.01075 | 0.00049 | 33.58134  | 2.42172  | 6.36     | 0.46 | 2.93369    | 1    |      |      |
| Chisana-6                                                      | Chisana | 58.0991   | 0.19355  | 0.2479    | 0.00455 | 0.08516   | 0.00154 | 43.30224 | 0.77545 | 0.45495  | 0.00835 | 0.00301 | 0.00024 | 32.92982  | 0.46654  | 6.23     | 0.09 | 1.3449     | 1    |      |      |
| Chisana-7                                                      | Chisana | 51.09066  | 0.25466  | 0.51129   | 0.0077  | 0.04011   | 0.00264 | 23.13017 | 1.52647 | 0.93849  | 0.01413 | 0.00328 | 0.0004  | 39.26466  | 0.80525  | 7.43     | 0.15 | 0.70122    | 1    |      |      |
| Chisana-8                                                      | Chisana | 51.27696  | 0.2109   | 0.61095   | 0.00764 | 0.0497    | 0.00266 | 28.55948 | 1.53493 | 1.12149  | 0.01403 | 0.0024  | 0.00025 | 36.62712  | 0.80549  | 6.93     | 0.15 | 0.73186    | 1    |      |      |
| Chisana-9                                                      | Chisana | 46.23093  | 0.31584  | 0.95616   | 0.01257 | 0.04492   | 0.00258 | 28.56127 | 1.63979 | 1.75561  | 0.0231  | 0.00218 | 0.00033 | 33.02789  | 0.79403  | 6.25     | 0.15 | 0.60031    | 1    |      |      |

**WRANGELL CLASTS WR 11-15A16 #41-#60**

Weighted average of J from standards = 1.054e-04 +/- 3.042e-07

| Weighted average of J from standards = 1.054e-04 +/- 3.042e-07 |         |           |         |           |         |           |         |          |         |         |         |         |         |           |         |        |          |          | *Step heat |          |          |     |  |
|----------------------------------------------------------------|---------|-----------|---------|-----------|---------|-----------|---------|----------|---------|---------|---------|---------|---------|-----------|---------|--------|----------|----------|------------|----------|----------|-----|--|
|                                                                |         | 40Ar/39Ar |         | 37Ar/39Ar |         | 36Ar/39Ar |         | % Atm.   |         | Ca/K    |         | Cl/K    |         | 40*/39K   |         | Age    |          | Volts    |            | # Grains |          | Age |  |
| Sample name                                                    |         | meas.     | +/-     | meas.     | +/-     | meas.     | +/-     | 40Ar     | +/-     |         | +/-     |         | +/-     |           | +/-     | (Ma)   | +/- (Ma) |          |            | (Ma)     | +/- (Ma) |     |  |
| Chisana-11                                                     | Chisana | 383.87002 | 1.98228 | 0.57099   | 0.01492 | 0.79606   | 0.011   | 61.27236 | 0.78615 | 1.04812 | 0.02739 | 0.02922 | 0.00078 | 148.71229 | 3.11731 | 28.04  | 0.58     | 3.41509  | 1          | 20.6     | 0.5      |     |  |
| Chisana-16                                                     | Chisana | 1124.7257 | 9.78276 | 4.53275   | 0.05374 | 0.78942   | 0.01097 | 20.70779 | 0.22515 | 8.34368 | 0.09924 | 0.01773 | 0.0006  | 894.66027 | 8.21457 | 162.45 | 1.43     | 12.00942 | 1          |          |          |     |  |
| Chisana-17                                                     | Chisana | 67.23996  | 0.25892 | 0.01663   | 0.00116 | 0.10153   | 0.0013  | 44.63607 | 0.55243 | 0.03051 | 0.00212 | 0.00051 | 0.00016 | 37.21068  | 0.40425 | 7.06   | 0.08     | 2.61533  | 1          |          |          |     |  |
| Chisana-18                                                     | Chisana | 105.47728 | 0.50329 | 1.17971   | 0.0078  | 0.21415   | 0.00318 | 59.91962 | 0.85171 | 2.1664  | 0.01434 | 0.00366 | 0.00035 | 42.29904  | 0.92619 | 8.02   | 0.18     | 2.12391  | 1          |          |          |     |  |

|          |        |           |         |         |         |          |         |          |          |          |         |         |         |           |         |        |      |          |   |
|----------|--------|-----------|---------|---------|---------|----------|---------|----------|----------|----------|---------|---------|---------|-----------|---------|--------|------|----------|---|
| Cross 1  | Cross  | 1146.4276 | 9.37956 | 0.22586 | 0.00822 | 0.17377  | 0.00418 | 4.4776   | 0.10123  | 0.41448  | 0.01509 | 0.00285 | 0.00068 | 1095.2415 | 9.03845 | 196.95 | 1.54 | 13.6089  | 1 |
| Cross 2  | Cross  | 1202.1627 | 8.22921 | 4.75666 | 0.0611  | 0.71677  | 0.01229 | 17.58643 | 0.2772   | 8.75723  | 0.11286 | 0.01033 | 0.00095 | 994.06006 | 7.60783 | 179.63 | 1.31 | 8.60884  | 1 |
| Cross 3  | Cross  | 642.76823 | 3.33631 | 0.03462 | 0.00289 | 0.04423  | 0.00142 | 2.03312  | 0.06423  | 0.06353  | 0.00531 | 0.04364 | 0.00047 | 629.68628 | 3.29507 | 115.85 | 0.59 | 15.08346 | 1 |
| Cross 4  | Cross  | 201.79624 | 1.45848 | 0.86061 | 0.00898 | 0.23308  | 0.00329 | 34.10048 | 0.4152   | 1.58007  | 0.0165  | 0.00726 | 0.00046 | 133.04405 | 1.2778  | 25.1   | 0.24 | 3.39525  | 1 |
| Cross 9  | Cross  | 272.41927 | 3.24617 | 7.78001 | 0.10361 | 0.78457  | 0.01394 | 84.87858 | 1.13427  | 14.35411 | 0.19221 | 0.11897 | 0.00269 | 41.41676  | 3.15178 | 7.85   | 0.6  | 1.53046  | 1 |
| Dad 1A-1 | Dadina | 61.0114   | 0.34106 | 1.15953 | 0.01095 | 0.19806  | 0.00228 | 95.81702 | 0.98231  | 2.12931  | 0.02012 | 0.02708 | 0.00073 | 2.55294   | 0.60014 | 0.49   | 0.11 | 0.87465  | 2 |
| Dad 1A-2 | Dadina | 20.64785  | 0.0926  | 0.91028 | 0.01086 | 0.06456  | 0.00213 | 92.16463 | 3.04603  | 1.67131  | 0.01996 | 0.00184 | 0.00037 | 1.61655   | 0.62876 | 0.31   | 0.12 | 0.3392   | 2 |
| Dad 1B-1 | Dadina | 72.14991  | 0.19283 | 0.7424  | 0.00664 | 0.21118  | 0.00217 | 86.44217 | 0.87009  | 1.36291  | 0.0122  | 0.00227 | 0.00025 | 9.78307   | 0.62969 | 1.86   | 0.12 | 1.8365   | 2 |
| Dad 1B-2 | Dadina | 2.74603   | 0.03778 | 2.02381 | 0.01646 | 0.00126  | 0.00168 | 7.51777  | 18.32379 | 3.71872  | 0.03029 | 0.03635 | 0.00053 | 2.51575   | 0.49985 | 0.48   | 0.09 | 0.03478  | 2 |
| Dad 1B-3 | Dadina | 5.16671   | 0.04133 | 1.10032 | 0.01668 | 0.00892  | 0.00157 | 49.56763 | 9.01158  | 2.02051  | 0.03064 | 0.00346 | 0.00033 | 2.59274   | 0.46428 | 0.49   | 0.09 | 0.07429  | 2 |
| Dad 1B-4 | Dadina | 9.36281   | 0.03835 | 0.95387 | 0.0085  | 0.01966  | 0.00152 | 61.41743 | 4.80374  | 1.7514   | 0.01561 | 0.01927 | 0.00033 | 3.60339   | 0.44916 | 0.68   | 0.09 | 0.22271  | 2 |
| Dad 1C-1 | Dadina | 3.64219   | 0.033   | 0.61193 | 0.01102 | -0.00079 | 0.00198 | -7.88193 | 16.19924 | 1.1233   | 0.02025 | 0.01946 | 0.00038 | 3.89892   | 0.58643 | 0.74   | 0.11 | 0.04924  | 2 |
| Dad 1C-2 | Dadina | 8.65763   | 0.03385 | 1.31298 | 0.0142  | 0.00355  | 0.00152 | 10.8937  | 5.20826  | 2.41137  | 0.0261  | 0.00491 | 0.00029 | 7.69519   | 0.45087 | 1.46   | 0.09 | 0.18422  | 2 |
| Dad 1C-3 | Dadina | 3.13973   | 0.02084 | 0.19941 | 0.0063  | 0.00057  | 0.00141 | 4.84387  | 13.35837 | 0.36594  | 0.01157 | 0.00046 | 0.0002  | 2.9598    | 0.41601 | 0.56   | 0.08 | 0.05984  | 2 |
| Dad 1C-4 | Dadina | 6.61198   | 0.0434  | 0.28409 | 0.00572 | 0.01076  | 0.00158 | 47.93705 | 7.09227  | 0.52138  | 0.0105  | 0.00036 | 0.00013 | 3.42762   | 0.46777 | 0.65   | 0.09 | 0.14366  | 2 |
| Dad 1C-5 | Dadina | 4.40084   | 0.04612 | 0.80411 | 0.01347 | 0.00147  | 0.00289 | 8.42781  | 19.54387 | 1.47627  | 0.02475 | 0.00152 | 0.00048 | 4.00504   | 0.85591 | 0.76   | 0.16 | 0.04406  | 2 |

#### WRANGELL CLASTS WR 11-15A16 #60-#80

Weighted average of J from standards = 9.377e-05 +/- 4.498e-07

|               |            | 40Ar/39Ar | +/-      | 37Ar/39Ar | +/-     | 36Ar/39Ar | +/-     | % Atm.   | +/-     | Ca/K     | +/-     | Cl/K    | +/-     | 40*/39K   | +/-     | Age    | +/-  | Volts    | # Grains | Age  | +/-  | *Step heat |
|---------------|------------|-----------|----------|-----------|---------|-----------|---------|----------|---------|----------|---------|---------|---------|-----------|---------|--------|------|----------|----------|------|------|------------|
| Sample name   |            | meas.     |          | meas.     |         | meas.     |         | 40Ar     |         |          |         |         |         |           |         | (Ma)   | (Ma) |          |          | (Ma) | (Ma) |            |
| Nabesna 1     | Nabesna    | 132.77372 | 1.49642  | 1.33852   | 0.02744 | 0.0934    | 0.00604 | 20.7077  | 1.32588 | 2.45833  | 0.05044 | 0.02872 | 0.00128 | 105.3554  | 2.13533 | 17.72  | 0.36 | 0.56533  | 1        |      |      |            |
| Nabesna 2     | Nabesna    | 452.58378 | 8.96188  | 2.11835   | 0.0543  | 0.93409   | 0.02442 | 60.95356 | 1.0478  | 3.89271  | 0.09993 | 0.06622 | 0.00297 | 176.971   | 5.92146 | 29.66  | 0.98 | 1.16475  | 1        | 23.9 |      | 0.4        |
| Nabesna 4     | Nabesna    | 159.25889 | 1.05426  | 1.20565   | 0.01641 | 0.15271   | 0.00381 | 28.27689 | 0.68501 | 2.21408  | 0.03017 | 0.01476 | 0.00075 | 114.30146 | 1.33872 | 19.21  | 0.22 | 1.18871  | 1        |      |      |            |
| Nabesna 5     | Nabesna    | 582.82995 | 1.37628  | 0.58305   | 0.0073  | 0.54617   | 0.00525 | 27.68424 | 0.25859 | 1.70725  | 0.01341 | 0.00766 | 0.00038 | 421.63005 | 1.81385 | 69.87  | 0.29 | 16.30858 | 1        |      |      |            |
| Nabesna 7     | Nabesna    | 150.58167 | 1.44606  | 0.81505   | 0.01915 | 0.10015   | 0.00626 | 19.6121  | 1.21503 | 1.49636  | 0.03518 | 0.00766 | 0.00092 | 121.09529 | 2.17037 | 20.35  | 0.36 | 0.9647   | 1        |      |      |            |
| Nabesna 8     | Nabesna    | 127.75277 | 0.49677  | 1.35611   | 0.01755 | 0.05454   | 0.00446 | 12.53187 | 1.03171 | 2.49067  | 0.03226 | 0.00064 | 0.00074 | 111.8241  | 1.3918  | 18.8   | 0.23 | 0.79333  | 1        |      |      |            |
| Nabesna 11    | Nabesna    | 1518.8729 | 13.64052 | 8.53636   | 0.07872 | 1.95696   | 0.01977 | 38.02756 | 0.17751 | 15.75805 | 0.14619 | 0.00689 | 0.00086 | 946.97311 | 8.98709 | 153.31 | 1.39 | 9.17461  | 1        |      |      |            |
| Nabesna 12    | Nabesna    | 32.20291  | 0.32543  | 3.29306   | 0.04153 | 0.08239   | 0.00653 | 74.8242  | 5.95394 | 6.0564   | 0.07656 | 0.06449 | 0.00137 | 8.11876   | 1.92262 | 1.37   | 0.32 | 0.13146  | 1        |      |      |            |
| Nabesna 13    | Nabesna    | 178.77837 | 0.94255  | 0.36015   | 0.00677 | 0.06399   | 0.00247 | 10.56162 | 0.40507 | 0.66099  | 0.01243 | 0.0024  | 0.00045 | 159.91059 | 1.11694 | 26.82  | 0.19 | 2.23625  | 1        | 27.7 |      | 0.2        |
| Nabesna 14    | Nabesna    | 275.94686 | 1.61441  | 1.2039    | 0.019   | 0.47834   | 0.00582 | 51.19328 | 0.54713 | 2.21088  | 0.03492 | 0.01351 | 0.00088 | 134.78072 | 1.70683 | 22.63  | 0.28 | 2.87825  | 1        |      |      |            |
| Che 1A-1      | Chetaslina | 17.24291  | 0.09611  | 0.79771   | 0.01249 | 0.05073   | 0.00215 | 86.6992  | 3.6546  | 1.46451  | 0.02295 | 0.0126  | 0.00025 | 2.29079   | 0.62967 | 0.39   | 0.11 | 0.2355   | 2        |      |      |            |
| Che 1A-2      | Chetaslina | 80.35281  | 0.35948  | 0.45747   | 0.00648 | 0.25954   | 0.00247 | 95.43592 | 0.82282 | 0.83967  | 0.01189 | 0.02649 | 0.00036 | 3.66719   | 0.66213 | 0.62   | 0.11 | 1.63622  | 2        |      |      |            |
| Che 1A-3      | Chetaslina | 575.00533 | 2.81537  | 0.9651    | 0.00736 | 1.92771   | 0.01436 | 99.05784 | 0.55974 | 1.77204  | 0.01352 | 0.00408 | 0.00076 | 5.42089   | 3.22087 | 0.92   | 0.54 | 8.92782  | 2        |      |      |            |
| Che 1B-1 (BI) |            | 948.01516 | 3.05857  | 0.02279   | 0.00356 | 0.0703    | 0.00225 | 2.19115  | 0.06975 | 0.04182  | 0.00654 | 0.0033  | 0.00035 | 927.22858 | 3.06499 | 150.24 | 0.48 | 24.27026 | 2        |      |      |            |
| Che 1B-2      | Chetaslina | 987.08618 | 6.43814  | 0.82145   | 0.00988 | 0.15704   | 0.00228 | 4.69456  | 0.061   | 1.50812  | 0.01815 | 0.011   | 0.00036 | 941.26462 | 6.17378 | 152.42 | 0.96 | 23.7192  | 2        |      |      |            |
| Che 1C-2      | Chetaslina | 11.87068  | 0.13451  | 1.87354   | 0.02296 | 0.03355   | 0.00224 | 82.42608 | 5.59189 | 3.44224  | 0.04225 | 0.01367 | 0.00052 | 2.08369   | 0.66536 | 0.35   | 0.11 | 0.1401   | 2        |      |      |            |
| Che 1C-3      | Chetaslina | 7.00215   | 0.02816  | 0.2984    | 0.00608 | 0.01355   | 0.00157 | 57.0631  | 6.67281 | 0.54764  | 0.01115 | 0.00029 | 0.00024 | 2.99439   | 0.46565 | 0.51   | 0.08 | 0.16628  | 2        |      |      |            |
| Che 1C-5      | Chetaslina | 130.76249 | 0.59195  | 0.61886   | 0.00769 | 0.4273    | 0.00504 | 96.54563 | 1.07533 | 1.13601  | 0.01413 | 0.01527 | 0.00036 | 4.51797   | 1.40766 | 0.76   | 0.24 | 2.32502  | 2        |      |      |            |
| Che 1C-6      | Chetaslina | 19.00503  | 0.09783  | 0.87499   | 0.0072  | 0.05989   | 0.00138 | 92.87785 | 2.09849 | 1.60648  | 0.01323 | 0.03435 | 0.00035 | 1.35229   | 0.39864 | 0.23   | 0.07 | 0.52172  | 2        |      |      |            |
| Cross 3       | Cross      | 761.10439 | 2.41286  | 0.65685   | 0.00839 | 0.13042   | 0.00153 | 5.05649  | 0.05741 | 1.2058   | 0.01542 | 0.0059  | 0.00025 | 722.92638 | 2.33645 | 118.19 | 0.37 | 23.30714 | 1        |      |      |            |

#### WRANGELL CLASTS WR 11-15A16 #80-#100

Weighted average of J from standards = 9.653e-05 +/- 5.912e-07

|             |         | 40Ar/39Ar | +/-       | 37Ar/39Ar | +/-     | 36Ar/39Ar | +/-     | % Atm.   | +/-      | Ca/K      | +/-      | Cl/K    | +/-     | 40*/39K   | +/-      | Age    | +/-   | Volts    | # Grains |  |  |  |
|-------------|---------|-----------|-----------|-----------|---------|-----------|---------|----------|----------|-----------|----------|---------|---------|-----------|----------|--------|-------|----------|----------|--|--|--|
| Sample name |         | meas.     |           | meas.     |         | meas.     |         | 40Ar     |          |           |          |         |         |           |          | (Ma)   | (Ma)  |          |          |  |  |  |
| Cross 5     | Cross   | 924.06678 | 5.91813   | 0.2396    | 0.00701 | 0.12736   | 0.00398 | 4.07089  | 0.12474  | 0.4397    | 0.01287  | 0.00068 | 0.0006  | 886.57054 | 5.79568  | 147.97 | 0.93  | 10.93585 | 1        |  |  |  |
| Cross 6     | Cross   | 659.52247 | 4.34735   | 0.60861   | 0.01003 | 0.48533   | 0.00714 | 21.73849 | 0.28605  | 1.11719   | 0.01842  | 0.01214 | 0.00045 | 516.35093 | 3.89564  | 87.65  | 0.65  | 13.65695 | 1        |  |  |  |
| Cross 7     | Cross   | 248.23067 | 0.8349    | 0.46537   | 0.00961 | 0.31887   | 0.00583 | 37.94758 | 0.68404  | 0.85417   | 0.01765  | 0.00489 | 0.00076 | 154.06535 | 1.78145  | 26.6   | 0.31  | 2.01366  | 1        |  |  |  |
| Kot 11 7/23 | Kotsina | 24.98463  | 0.07883   | 0.73383   | 0.01013 | 0.07177   | 0.00227 | 84.74349 | 2.68144  | 1.34717   | 0.01861  | 0.02659 | 0.00048 | 3.80923   | 0.66988  | 0.66   | 0.12  | 0.437    | 2        |  |  |  |
| Kot 12 7/23 | Kotsina | 145.48933 | 1.22624   | 1.17504   | 0.01861 | 0.49224   | 0.00736 | 99.93119 | 1.25383  | 2.15782   | 0.03421  | 0.03294 | 0.00104 | 0.10018   | 1.82535  | 0.02   | 0.32  | 1.35848  | 2        |  |  |  |
| Kot 14 7/23 | Kotsina | 7.69315   | 0.06232   | 0.95537   | 0.01535 | 0.00974   | 0.00238 | 36.5207  | 9.1757   | 1.75415   | 0.02819  | 0.00568 | 0.0004  | 4.868     | 0.70504  | 0.85   | 0.12  | 0.12168  | 2        |  |  |  |
| Kot 15 7/23 | Kotsina | 1.27408   | 0.02372   | 0.56848   | 0.00773 | 0.00227   | 0.00204 | 50.2442  | 48.44621 | 1.04351   | 0.0142   | 0.00425 | 0.00029 | 0.6194    | 0.60344  | 0.11   | 0.1   | 0.023    | 2        |  |  |  |
| Kot 16 7/23 | Kotsina | 3557.3337 | 207.22948 | 88.25716  | 5.17206 | 7.89594   | 0.47944 | 65.3859  | 1.12707  | 172.70412 | 10.79357 | 0.28476 | 0.02051 | 1313.1777 | 92.14551 | 215.07 | 14.23 | 1.68246  | 2        |  |  |  |
| Kot 1A-1    | Kotsina | 179.45311 | 0.64441   | 0.76302   | 0.01125 | 0.59897   | 0.00776 | 98.61233 | 1.22874  | 1.40079   | 0.02067  | 0.02885 | 0.00078 | 2.49115   | 2.20592  | 0.43   | 0.38  | 3.17915  | 2        |  |  |  |
| Kot 1A-2    | Kotsina | 137.35609 | 0.45179   | 0.82796   | 0.01152 | 0.45245   | 0.00436 | 97.30872 | 0.88288  | 1.52009   | 0.02117  | 0.02945 | 0.00056 | 3.698     | 1.21325  | 0.64   | 0.21  | 3.20149  | 2        |  |  |  |
| Kot 1B-1    | Kotsina | 1006.9576 | 7.06201   | 0.93212   | 0.01432 | 0.3179    | 0.00794 | 9.32178  | 0.22371  | 1.71143   | 0.02632  | 0.00456 | 0.00066 | 913.66574 | 6.79842  | 152.31 | 1.09  | 8.76884  | 2        |  |  |  |
| Kot 1B-2    | Kotsina | 119.70986 | 0.3482    | 0.71227   | 0.0071  | 0.39564   | 0.00373 | 97.63835 | 0.87831  | 1.30758   | 0.01304  | 0.02777 | 0.00035 | 2.82784   | 1.05177  | 0.49   | 0.18  | 2.92448  | 2        |  |  |  |

|          |         |           |         |         |         |         |         |          |          |         |         |         |         |           |         |        |      |         |   |
|----------|---------|-----------|---------|---------|---------|---------|---------|----------|----------|---------|---------|---------|---------|-----------|---------|--------|------|---------|---|
| Kot 1B-4 | Kotsina | 9.43723   | 0.07067 | 0.30204 | 0.00702 | 0.02121 | 0.00329 | 66.34828 | 10.32129 | 0.55431 | 0.01289 | 0.00298 | 0.00048 | 3.16647   | 0.97168 | 0.55   | 0.17 | 0.15697 | 2 |
| Kot 1B-5 | Kotsina | 64.41687  | 0.2988  | 0.5667  | 0.00756 | 0.20482 | 0.00318 | 93.92636 | 1.40039  | 1.04022 | 0.01388 | 0.0249  | 0.00057 | 3.91221   | 0.90259 | 0.68   | 0.16 | 1.51041 | 2 |
| Kot 1B-6 | Kotsina | 950.56776 | 2.54466 | 0.27846 | 0.00457 | 0.16856 | 0.00169 | 5.23763  | 0.05059  | 0.51104 | 0.0084  | 0.00108 | 0.00032 | 900.92955 | 2.46203 | 150.27 | 0.39 | 17.949  | 2 |
| Nad 1A-1 | Nadina  | 12.8352   | 0.06974 | 1.80567 | 0.02205 | 0.03267 | 0.00329 | 74.23387 | 7.58853  | 3.31738 | 0.04057 | 0.0151  | 0.00069 | 3.30371   | 0.97354 | 0.57   | 0.17 | 0.13404 | 2 |
| Nad 1A-2 | Nadina  | 39.7172   | 0.19205 | 0.69596 | 0.00959 | 0.12528 | 0.00203 | 93.13639 | 1.45221  | 1.27761 | 0.01761 | 0.0116  | 0.00027 | 2.72534   | 0.57706 | 0.47   | 0.1  | 0.77675 | 2 |
| Nad 1A-3 | Nadina  | 60.05548  | 0.42144 | 1.68177 | 0.02323 | 0.18871 | 0.00654 | 92.66744 | 3.15841  | 3.08949 | 0.04272 | 0.00219 | 0.00087 | 4.40666   | 1.89871 | 0.77   | 0.33 | 0.42029 | 2 |
| Nad 1A-4 | Nadina  | 2.78138   | 0.05343 | 1.14165 | 0.02205 | 0.00255 | 0.00315 | 23.93555 | 33.83464 | 2.09647 | 0.04052 | 0.02182 | 0.00054 | 2.09476   | 0.93314 | 0.36   | 0.16 | 0.02949 | 2 |

#### WRANGELL CLASTS WR 11-15A16 #101-#122

Weighted average of J from standards = 9.653e-05 +/- 5.912e-07

| Sample name    |           | 40Ar/39Ar<br>meas. | +/-      | 37Ar/39Ar<br>meas. | +/-     | 36Ar/39Ar<br>meas. | +/-     | % Atm.<br>40Ar | +/-     | Ca/K     | +/-     | Cl/K    | +/-     | 40*/39K   | +/-      | Age<br>(Ma) | +/-<br>(Ma) | Volts   | # Grains |
|----------------|-----------|--------------------|----------|--------------------|---------|--------------------|---------|----------------|---------|----------|---------|---------|---------|-----------|----------|-------------|-------------|---------|----------|
| Nad 1A-5       | Nadina    | 16.16308           | 0.07572  | 0.84611            | 0.00778 | 0.0516             | 0.00261 | 94.07938       | 4.75957 | 1.55343  | 0.01429 | 0.00242 | 0.00031 | 0.95577   | 0.76844  | 0.17        | 0.13        | 0.24063 | 2        |
| Nad 1A-6       | Nadina    | 25.73234           | 0.26627  | 1.7901             | 0.02448 | 0.08175            | 0.00353 | 93.41479       | 3.94546 | 3.28874  | 0.04504 | 0.01378 | 0.00041 | 1.69472   | 1.01568  | 0.29        | 0.18        | 0.27257 | 2        |
| Nad 1B-1       | Nadina    | 7.29724            | 0.07069  | 1.08155            | 0.02967 | 0.01723            | 0.00561 | 68.82933       | 22.8179 | 1.98602  | 0.05452 | 0.00667 | 0.00064 | 2.26708   | 1.66005  | 0.39        | 0.29        | 0.04108 | 2        |
| Nad 1B-2       | Nadina    | 11.47077           | 0.04588  | 1.2211             | 0.00889 | 0.02191            | 0.00221 | 55.71966       | 5.71088 | 2.24249  | 0.01635 | 0.02719 | 0.00034 | 5.07053   | 0.65445  | 0.88        | 0.11        | 0.22778 | 2        |
| Kusk-1A-1      | Kuskalana | 57.24689           | 0.21134  | 0.44763            | 0.00669 | 0.13386            | 0.00236 | 69.06622       | 1.20494 | 0.82159  | 0.01229 | 0.00208 | 0.00023 | 17.70504  | 0.69558  | 3.08        | 0.12        | 1.43095 | 2        |
| Kusk-1B-1      | Kuskalana | 229.61414          | 2.01874  | 1.02794            | 0.01618 | 0.71798            | 0.01174 | 92.37513       | 1.28116 | 1.88751  | 0.02973 | 0.00304 | 0.00057 | 17.51822  | 2.94892  | 3.04        | 0.51        | 2.40652 | 2        |
| Kusk-1B-2      | Kuskalana | 69.41188           | 0.26048  | 0.45352            | 0.00844 | 0.17349            | 0.00323 | 73.83717       | 1.35348 | 0.83242  | 0.0155  | 0.00229 | 0.00031 | 18.15816  | 0.94315  | 3.16        | 0.16        | 1.19035 | 2        |
| Kusk-1B-3      | Kuskalana | 35.54177           | 0.2365   | 0.79964            | 0.00875 | 0.06615            | 0.00267 | 54.85981       | 2.19559 | 1.46806  | 0.01606 | 0.00165 | 0.0003  | 16.03928  | 0.78857  | 2.79        | 0.14        | 0.66772 | 2        |
| Kusk-1B-4      | Kuskalana | 120.30248          | 0.64395  | 0.944              | 0.00954 | 0.35113            | 0.00422 | 86.20464       | 0.92835 | 1.73327  | 0.01753 | 0.00403 | 0.00036 | 16.60314  | 1.12107  | 2.89        | 0.19        | 3.02405 | 2        |
| Kusk-1B-5      | Kuskalana | 175.03778          | 0.44663  | 0.48287            | 0.00839 | 0.51898            | 0.00501 | 87.60616       | 0.8164  | 0.8863   | 0.01541 | 0.00427 | 0.00052 | 21.69763  | 1.43065  | 3.77        | 0.25        | 3.80497 | 2        |
| Kusk-1B-6      | Kuskalana | 76.98563           | 0.23562  | 0.63736            | 0.00821 | 0.19344            | 0.00343 | 74.2095        | 1.30065 | 1.16999  | 0.01508 | 0.00437 | 0.00031 | 19.85626  | 1.00461  | 3.45        | 0.17        | 1.62449 | 2        |
| Kusk-1B-7      | Kuskalana | 138.53934          | 0.5154   | 0.76597            | 0.01196 | 0.40456            | 0.00544 | 86.26449       | 1.12975 | 1.40621  | 0.02196 | 0.00258 | 0.00037 | 19.0353   | 1.57044  | 3.31        | 0.27        | 2.58442 | 2        |
| Kusk-1B-8      | Kuskalana | 74.14033           | 0.35094  | 0.64076            | 0.01094 | 0.19018            | 0.00366 | 75.75817       | 1.42285 | 1.17624  | 0.02009 | 0.00327 | 0.00034 | 17.97391  | 1.06073  | 3.12        | 0.18        | 1.296   | 2        |
| Kusk-1C-1      | Kuskalana | 137.19123          | 1.0195   | 2.84903            | 0.03083 | 0.3926             | 0.00658 | 84.40947       | 1.27676 | 5.23811  | 0.05679 | 0.0025  | 0.00058 | 21.42733  | 1.76358  | 3.72        | 0.31        | 1.14112 | 2        |
| Kusk-1C-2 (HO) | Kuskalana | 120.38647          | 0.95291  | 9.61229            | 0.09853 | 0.32357            | 0.00821 | 78.7844        | 1.92151 | 17.75777 | 0.18327 | 0.05331 | 0.00099 | 25.70898  | 2.33983  | 4.47        | 0.41        | 0.8252  | 4        |
| Kusk-1C-3      | Kuskalana | 129.34624          | 0.34058  | 0.23658            | 0.00478 | 0.34903            | 0.00465 | 79.74226       | 1.04163 | 0.43417  | 0.00878 | 0.00259 | 0.00025 | 26.20098  | 1.34928  | 4.55        | 0.23        | 3.54591 | 2        |
| Kusk-1C-4      | Kuskalana | 160.34358          | 1.44533  | 1.75235            | 0.02406 | 0.46409            | 0.00877 | 85.45301       | 1.42483 | 3.2193   | 0.04426 | 0.00215 | 0.00101 | 23.34974  | 2.29798  | 4.06        | 0.4         | 1.42613 | 2        |
| Kusk-1C-6      | Kuskalana | 214.8663           | 1.90135  | 1.13706            | 0.02442 | 0.65715            | 0.0107  | 90.34437       | 1.2553  | 2.08803  | 0.04488 | 0.00555 | 0.0013  | 20.7605   | 2.70963  | 3.61        | 0.47        | 1.72446 | 2        |
| Kusk-1C-5      | Kuskalana | 92.99143           | 0.2478   | 0.36333            | 0.00359 | 0.23615            | 0.00291 | 75.03495       | 0.90427 | 0.66683  | 0.0066  | 0.00123 | 0.00021 | 23.2139   | 0.84338  | 4.03        | 0.15        | 5.44606 | 2        |
| Kusk-1D-1      | Kuskalana | 52.74231           | 0.22543  | 1.19692            | 0.0176  | 0.11441            | 0.00349 | 63.94749       | 1.93992 | 2.19804  | 0.03234 | 0.00571 | 0.00044 | 19.02031  | 1.02803  | 3.31        | 0.18        | 0.65732 | 2        |
| Cross 8        | Cross     | 1499.0703          | 24.30575 | 0.05218            | 0.03505 | 1.41496            | 0.03097 | 27.89234       | 0.41038 | 0.09575  | 0.06431 | 0.01343 | 0.00195 | 1080.9629 | 18.57928 | 178.86      | 2.93        | 6.33374 | 1        |
| Cross10        | Cross     | 178.70573          | 0.83591  | 0.44399            | 0.00476 | 0.09065            | 0.0016  | 14.97126       | 0.25659 | 0.81491  | 0.00873 | 0.00556 | 0.00027 | 151.97363 | 0.85494  | 26.8        | 0.15        | 3.2877  | 1        |

#### CLASTS WR 11-21B16 #110

Weighted average of J from standards = 1.252e-04 +/- 6.542e-07

| Sample name |         | 40Ar/39Ar<br>meas. | +/-     | 37Ar/39Ar<br>meas. | +/-    | 36Ar/39Ar<br>meas. | +/-     | % Atm.<br>40Ar | +/-     | Ca/K    | +/-     | Cl/K    | +/-     | 40*/39K  | +/-    | Age<br>(Ma) | +/-<br>(Ma) | Volts   | # Grains |
|-------------|---------|--------------------|---------|--------------------|--------|--------------------|---------|----------------|---------|---------|---------|---------|---------|----------|--------|-------------|-------------|---------|----------|
| Chisana 12  | Chisana | 72.22306           | 0.63176 | 0.05604            | 0.0059 | 0.15607            | 0.00212 | 63.87377       | 0.68067 | 0.10283 | 0.01082 | 0.00105 | 0.00034 | 26.08178 | 0.5477 | 5.88        | 0.12        | 0.77922 | 1        |

#### CLASTS WR 11-21B16 #111-#114

Weighted average of J from standards = 1.206e-04 +/- 5.634e-07

| Sample name |         | 40Ar/39Ar<br>meas. | +/-     | 37Ar/39Ar<br>meas. | +/-     | 36Ar/39Ar<br>meas. | +/-     | % Atm.<br>40Ar | +/-     | Ca/K    | +/-     | Cl/K    | +/-     | 40*/39K  | +/-     | Age<br>(Ma) | +/-<br>(Ma) | Volts   | # Grains |
|-------------|---------|--------------------|---------|--------------------|---------|--------------------|---------|----------------|---------|---------|---------|---------|---------|----------|---------|-------------|-------------|---------|----------|
| Chisana 13  | Chisana | 114.51218          | 0.66948 | 0.75594            | 0.00955 | 0.26447            | 0.00598 | 68.21088       | 1.50474 | 1.38778 | 0.01755 | 0.00293 | 0.00051 | 36.41242 | 1.74456 | 7.9         | 0.38        | 0.6693  | 1        |
| Chisana 14  | Chisana | 67.34095           | 0.6328  | 0.86821            | 0.01804 | 0.08534            | 0.00309 | 37.35893       | 1.31209 | 1.59402 | 0.03314 | 0.01188 | 0.00042 | 42.19036 | 0.97054 | 9.15        | 0.21        | 0.44961 | 1        |
| Chisana 15  | Chisana | 34.27781           | 0.0785  | 0.05299            | 0.00343 | 0.01373            | 0.00066 | 11.83734       | 0.56569 | 0.09724 | 0.0063  | 0.00198 | 0.00016 | 30.19518 | 0.20639 | 6.55        | 0.04        | 0.69514 | 1        |

#### Note:

Monitor mineral TCR with an age of 28.619 Ma (Renne et al., 2010) was used to monitor neutron flux and calculate ages.

\*Refer to Repository Item DR6 for step-heat <sup>40</sup>Ar/<sup>39</sup>Ar data

#### Reference:

Renne, P.R., Mundil, R., Balco, G., Min, K., and Ludwig, K.R., 2010, Joint determination of <sup>40</sup>K decay constants and <sup>40</sup>Ar/<sup>40</sup>K for the Fish Canyon sanidine standard, and improved accuracy for <sup>40</sup>Ar/<sup>39</sup>Ar geochronology: Geochimica et Cosmochimica Acta, v. 74, p. 5349.
