# Supplementary material
Source: publisher figshare collection journal article supplement (https://gsapubs.figshare.com/articles/dataset/_/15167367)
Supplement: Supplementary file 8 [file 1 › GS2471_SuppItemS10.pdf]

**Supplemental Item S10 - Detrital volcanic-lithic <sup>40</sup>Ar/<sup>39</sup>Ar (DARL) step-heat ages from cobbles sampled from modern rivers, Wrangell Arc, Wrangell-St. Elias Mountains, Alaska-Canada**

**CHISANA-2 WR#L1**

Weighted average of J from standards = 1.052e-04 +/- 1.125e-06

| Laser Power<br>(mW) | Cumulative<br>39Ar | 40Ar/39Ar<br>meas. | +/-      | 37Ar/39Ar<br>meas. | +/-     | 36Ar/39Ar<br>meas. | +/-     | % Atm.<br>40Ar | +/-     | Ca/K    | +/-     | Cl/K    | +/-     | 40*/39K  | +/-      | Age<br>(Ma) | +/-<br>(Ma) |
|---------------------|--------------------|--------------------|----------|--------------------|---------|--------------------|---------|----------------|---------|---------|---------|---------|---------|----------|----------|-------------|-------------|
| 500                 | 0.0218             | 3289.61            | 128.2982 | 0.66262            | 0.14439 | 9.85753            | 0.3917  | 88.54765       | 0.69175 | 1.21638 | 0.26518 | 0.04255 | 0.00794 | 376.9106 | 27.16716 | 70.07       | 4.95        |
| 1000                | 0.1156             | 517.2004           | 9.13909  | 0.45878            | 0.04697 | 1.3312             | 0.0281  | 76.05468       | 0.89899 | 0.84207 | 0.08624 | 0.04598 | 0.00269 | 123.8783 | 5.17126  | 23.33       | 0.97        |
| 1500                | 0.2417             | 332.7015           | 4.34645  | 0.5422             | 0.03502 | 0.71635            | 0.01473 | 63.61729       | 1.02134 | 0.99524 | 0.06431 | 0.0583  | 0.00136 | 121.0814 | 3.76731  | 22.81       | 0.71        |
| 2000                | 0.4207             | 193.7595           | 1.65613  | 0.59695            | 0.02989 | 0.26228            | 0.00753 | 39.9811        | 1.10169 | 1.09578 | 0.05488 | 0.01913 | 0.00089 | 116.3235 | 2.36984  | 21.92       | 0.44        |
| 2500                | 0.5722             | 169.4783           | 1.674    | 0.67761            | 0.02947 | 0.16279            | 0.00768 | 28.3553        | 1.3123  | 1.24391 | 0.05412 | 0.01236 | 0.00109 | 121.4591 | 2.53849  | 22.88       | 0.48        |
| 3000                | 0.6683             | 157.3317           | 1.83576  | 0.97841            | 0.06022 | 0.11325            | 0.00991 | 21.22239       | 1.84623 | 1.79649 | 0.11065 | 0.00948 | 0.00132 | 124.0044 | 3.25238  | 23.36       | 0.61        |
| 4000                | 0.7738             | 176.3053           | 3.23225  | 0.66402            | 0.03507 | 0.17204            | 0.0094  | 28.80928       | 1.48805 | 1.21896 | 0.06441 | 0.00786 | 0.00131 | 125.5508 | 3.50176  | 23.65       | 0.66        |
| 9000                | 1                  | 309.7258           | 3.94155  | 0.9974             | 0.03302 | 0.5209             | 0.00908 | 49.67586       | 0.60522 | 1.83138 | 0.06067 | 0.01596 | 0.00112 | 155.9617 | 2.75923  | 29.33       | 0.51        |
| Integrated          |                    | 326.2613           | 1.59582  | 0.72508            | 0.01408 | 0.64838            | 0.00485 | 58.71197       | 0.33738 | 1.33111 | 0.02587 | 0.02324 | 0.00052 | 134.7636 | 1.29228  | 25.37       | 0.36        |

**CHISANA-11 WR#L1**

Weighted average of J from standards = 1.054e-04 +/- 3.042e-07

| Laser Power<br>(mW) | Cumulative<br>39Ar | 40Ar/39Ar<br>meas. | +/-      | 37Ar/39Ar<br>meas. | +/-     | 36Ar/39Ar<br>meas. | +/-     | % Atm.<br>40Ar | +/-     | Ca/K    | +/-     | Cl/K    | +/-     | 40*/39K  | +/-      | Age<br>(Ma) | +/-<br>(Ma) |
|---------------------|--------------------|--------------------|----------|--------------------|---------|--------------------|---------|----------------|---------|---------|---------|---------|---------|----------|----------|-------------|-------------|
| 500                 | 0.0354             | 8256.331           | 375.7581 | 0.4529             | 0.37822 | 26.35721           | 1.20799 | 94.33423       | 0.5464  | 0.83127 | 0.69442 | 0.06461 | 0.01712 | 467.933  | 50.06073 | 86.79       | 9.07        |
| 1000                | 0.0999             | 1662.558           | 77.41123 | 0.94251            | 0.16215 | 5.04955            | 0.24534 | 89.74663       | 1.25867 | 1.73053 | 0.29792 | 0.1998  | 0.0106  | 170.5787 | 22.42093 | 32.12       | 4.19        |
| 1500                | 0.2611             | 484.2326           | 6.95155  | 0.62873            | 0.05984 | 1.28044            | 0.0246  | 78.13215       | 1.01739 | 1.15414 | 0.1099  | 0.0404  | 0.00262 | 105.9318 | 5.1827   | 20.02       | 0.97        |
| 2000                | 0.4468             | 176.8403           | 1.76284  | 0.21334            | 0.06131 | 0.22742            | 0.01185 | 37.99813       | 1.94536 | 0.3915  | 0.11253 | 0.01258 | 0.00158 | 109.6424 | 3.61194  | 20.71       | 0.68        |
| 2500                | 0.5572             | 166.2595           | 4.51128  | 0.20783            | 0.10023 | 0.18927            | 0.01612 | 33.63536       | 2.718   | 0.38139 | 0.18397 | 0.00748 | 0.00242 | 110.334  | 5.42809  | 20.84       | 1.02        |
| 3000                | 0.6217             | 164.4032           | 4.54122  | 0.28247            | 0.18112 | 0.15948            | 0.02633 | 28.65649       | 4.66724 | 0.5184  | 0.33246 | 0.00689 | 0.00418 | 117.2932 | 8.3336   | 22.15       | 1.56        |
| 4000                | 0.7107             | 207.4621           | 4.04187  | 1.20253            | 0.13386 | 0.34201            | 0.02559 | 48.67308       | 3.52058 | 2.20835 | 0.24604 | 0.02032 | 0.00359 | 106.5592 | 7.6022   | 20.14       | 1.43        |
| 9000                | 1                  | 636.2241           | 7.91432  | 1.08262            | 0.045   | 1.53819            | 0.02476 | 71.43189       | 0.73988 | 1.98798 | 0.08269 | 0.02044 | 0.00181 | 181.8878 | 5.24872  | 34.23       | 0.98        |
| Integrated          |                    | 741.9036           | 5.17423  | 0.67929            | 0.03276 | 2.01403            | 0.01692 | 80.21431       | 0.38463 | 1.24701 | 0.06016 | 0.03302 | 0.00113 | 146.8553 | 3.04783  | 27.69       | 0.58        |

**NABESNA-2 WR#L1**

Weighted average of J from standards = 9.377e-05 +/- 4.498e-07

| Laser Power<br>(mW) | Cumulative<br>39Ar | 40Ar/39Ar<br>meas. | +/-      | 37Ar/39Ar<br>meas. | +/-     | 36Ar/39Ar<br>meas. | +/-     | % Atm.<br>40Ar | +/-     | Ca/K    | +/-     | Cl/K    | +/-     | 40*/39K  | +/-      | Age<br>(Ma) | +/-<br>(Ma) |
|---------------------|--------------------|--------------------|----------|--------------------|---------|--------------------|---------|----------------|---------|---------|---------|---------|---------|----------|----------|-------------|-------------|
| 500                 | 0.0247             | 7694.829           | 431.9206 | 1.13509            | 0.21062 | 23.56779           | 1.32453 | 90.50513       | 0.29603 | 2.0844  | 0.38708 | 0.50977 | 0.03273 | 731.1976 | 47.13537 | 119.5       | 7.45        |
| 1000                | 0.1061             | 1969.957           | 25.39195 | 1.92541            | 0.06952 | 5.74191            | 0.09042 | 86.12381       | 0.79278 | 3.53767 | 0.12791 | 0.12108 | 0.00553 | 273.7231 | 16.07452 | 45.67       | 2.65        |
| 1500                | 0.264              | 415.5837           | 5.11483  | 0.66703            | 0.03572 | 0.91572            | 0.01615 | 65.10388       | 0.8262  | 1.22448 | 0.06561 | 0.01146 | 0.00171 | 145.0806 | 3.87973  | 24.35       | 0.65        |
| 2000                | 0.3893             | 441.0091           | 4.16157  | 0.62046            | 0.0404  | 1.00929            | 0.01615 | 67.62055       | 0.8821  | 1.13895 | 0.0742  | 0.01608 | 0.00151 | 142.8493 | 4.13538  | 23.98       | 0.69        |
| 2500                | 0.4956             | 403.0614           | 4.67511  | 0.53164            | 0.0591  | 0.88478            | 0.0158  | 64.86066       | 0.88689 | 0.97585 | 0.10852 | 0.01598 | 0.00149 | 141.6759 | 3.9468   | 23.78       | 0.66        |
| 3000                | 0.56               | 363.126            | 4.54206  | 0.87659            | 0.08347 | 0.76288            | 0.01826 | 62.06551       | 1.27322 | 1.60943 | 0.15334 | 0.02471 | 0.00293 | 137.8241 | 4.94995  | 23.14       | 0.83        |
| 5000                | 0.8018             | 440.4755           | 4.03862  | 1.02196            | 0.02535 | 0.9486             | 0.0134  | 63.62377       | 0.68932 | 1.87651 | 0.04659 | 0.03671 | 0.00098 | 160.3333 | 3.38837  | 26.89       | 0.56        |
| 9000                | 1                  | 595.4461           | 4.74293  | 2.3909             | 0.04166 | 1.3846             | 0.01647 | 68.68337       | 0.62709 | 4.3944  | 0.07671 | 0.07874 | 0.00146 | 186.7797 | 4.07551  | 31.29       | 0.68        |

|            |          |         |         |         |         |        |         |         |         |         |         |         |          |         |       |      |
|------------|----------|---------|---------|---------|---------|--------|---------|---------|---------|---------|---------|---------|----------|---------|-------|------|
| Integrated | 762.2992 | 3.21604 | 1.20204 | 0.01696 | 1.96831 | 0.0105 | 76.2902 | 0.25481 | 2.20745 | 0.03117 | 0.05406 | 0.00082 | 180.8861 | 2.10146 | 30.31 | 0.38 |
|------------|----------|---------|---------|---------|---------|--------|---------|---------|---------|---------|---------|---------|----------|---------|-------|------|

#### NABESNA-13 WR#L1

Weighted average of J from standards = 9.377e-05 +/- 4.498e-07

| Laser Power<br>(mW) | Cumulative<br>39Ar | 40Ar/39Ar<br>meas. | +/-     | 37Ar/39Ar<br>meas. | +/-     | 36Ar/39Ar<br>meas. | +/-     | % Atm.<br>40Ar | +/-     | Ca/K    | +/-     | Cl/K    | +/-     | 40*/39K  | +/-     | Age<br>(Ma) | +/-<br>(Ma) |
|---------------------|--------------------|--------------------|---------|--------------------|---------|--------------------|---------|----------------|---------|---------|---------|---------|---------|----------|---------|-------------|-------------|
| 500                 | 0.0469             | 275.2904           | 4.47181 | 0.12483            | 0.04853 | 0.60182            | 0.02286 | 64.60302       | 2.22177 | 0.22906 | 0.08907 | 0.00578 | 0.00222 | 97.44255 | 6.32358 | 16.39       | 1.06        |
| 1000                | 0.2191             | 177.1136           | 2.25546 | 0.25519            | 0.01497 | 0.07985            | 0.00362 | 13.31234       | 0.57979 | 0.46833 | 0.02749 | 0.00099 | 0.00058 | 153.5376 | 2.21207 | 25.76       | 0.37        |
| 1500                | 0.3964             | 187.0151           | 1.53264 | 0.22473            | 0.01526 | 0.07977            | 0.00398 | 12.59634       | 0.62017 | 0.41241 | 0.02801 | 0.00151 | 0.00104 | 163.4581 | 1.77526 | 27.41       | 0.3         |
| 2000                | 0.5592             | 169.7794           | 1.67722 | 0.24257            | 0.01305 | 0.0105             | 0.00495 | 1.8152         | 0.86216 | 0.44517 | 0.02395 | 0.00054 | 0.00075 | 166.697  | 2.20414 | 27.95       | 0.37        |
| 2500                | 0.6659             | 174.2413           | 1.84596 | 0.29827            | 0.01726 | 0.01663            | 0.0058  | 2.80632        | 0.98412 | 0.5474  | 0.03169 | 0.00173 | 0.0009  | 169.3583 | 2.48371 | 28.39       | 0.41        |
| 3000                | 0.7287             | 168.2396           | 3.32122 | 0.3521             | 0.04946 | 0.01851            | 0.00755 | 3.23483        | 1.32555 | 0.64622 | 0.09079 | 0.00494 | 0.00129 | 162.8091 | 3.91367 | 27.3        | 0.65        |
| 5000                | 0.901              | 175.0628           | 1.49967 | 0.54407            | 0.01726 | 0.03262            | 0.00433 | 5.482          | 0.73023 | 0.99868 | 0.0317  | 0.00806 | 0.00068 | 165.5013 | 1.91128 | 27.75       | 0.32        |
| 9000                | 1                  | 200.8332           | 2.95483 | 1.15045            | 0.03246 | 0.12857            | 0.00702 | 18.87356       | 0.99499 | 2.11263 | 0.05965 | 0.03546 | 0.00182 | 163.0372 | 3.12849 | 27.34       | 0.52        |

|            |          |         |         |         |         |         |          |         |         |         |         |         |          |         |       |     |
|------------|----------|---------|---------|---------|---------|---------|----------|---------|---------|---------|---------|---------|----------|---------|-------|-----|
| Integrated | 183.4116 | 0.76044 | 0.39078 | 0.00736 | 0.07911 | 0.00204 | 12.73033 | 0.32407 | 0.71723 | 0.01351 | 0.00619 | 0.00036 | 160.0809 | 0.89234 | 26.85 | 0.2 |
|------------|----------|---------|---------|---------|---------|---------|----------|---------|---------|---------|---------|---------|----------|---------|-------|-----|

#### WHITE-5 WR#L1

Weighted average of J from standards = 1.052e-04 +/- 1.125e-06

| Laser Power<br>(mW) | Cumulative<br>39Ar | 40Ar/39Ar<br>meas. | +/-      | 37Ar/39Ar<br>meas. | +/-     | 36Ar/39Ar<br>meas. | +/-     | % Atm.<br>40Ar | +/-      | Ca/K    | +/-     | Cl/K    | +/-     | 40*/39K  | +/-      | Age<br>(Ma) | +/-<br>(Ma) |
|---------------------|--------------------|--------------------|----------|--------------------|---------|--------------------|---------|----------------|----------|---------|---------|---------|---------|----------|----------|-------------|-------------|
| 500                 | 0.0536             | 7320.182           | 295.824  | 0.4086             | 0.33415 | 23.09843           | 0.96156 | 93.24333       | 0.94527  | 0.74995 | 0.61347 | 0.0757  | 0.01559 | 494.7413 | 72.11606 | 91.43       | 13          |
| 1000                | 0.15               | 1103.294           | 33.74046 | 1.42803            | 0.16423 | 3.16301            | 0.10812 | 84.70782       | 1.30774  | 2.62288 | 0.30195 | 0.02708 | 0.00651 | 168.8835 | 15.36611 | 31.74       | 2.86        |
| 1500                | 0.328              | 286.6835           | 5.96632  | 1.20256            | 0.12439 | 0.56581            | 0.01966 | 58.29214       | 1.63196  | 2.2084  | 0.22863 | 0.00778 | 0.00289 | 119.6588 | 5.32102  | 22.54       | 1           |
| 2000                | 0.4825             | 218.2201           | 4.95482  | 1.15662            | 0.11887 | 0.31148            | 0.01424 | 42.14017       | 1.67752  | 2.12398 | 0.21847 | 0.0004  | 0.00382 | 126.3478 | 4.66216  | 23.8        | 0.87        |
| 2500                | 0.5793             | 215.6748           | 7.1783   | 0.81032            | 0.18702 | 0.28463            | 0.0223  | 38.97146       | 2.76924  | 1.48768 | 0.34355 | 0.00304 | 0.00538 | 131.6804 | 7.41858  | 24.79       | 1.39        |
| 3000                | 0.6261             | 218.207            | 13.61231 | 0.74271            | 0.36153 | 0.31131            | 0.08953 | 42.13635       | 11.83911 | 1.36349 | 0.66405 | 0.02534 | 0.01252 | 126.3116 | 27.0269  | 23.79       | 5.06        |
| 4000                | 0.6925             | 264.8927           | 9.11539  | 2.19163            | 0.23292 | 0.47773            | 0.04187 | 53.23107       | 4.30603  | 4.02758 | 0.4287  | 0.04435 | 0.00951 | 124.0657 | 12.21773 | 23.37       | 2.29        |
| 9000                | 1                  | 706.5738           | 7.61539  | 3.7457             | 0.08816 | 1.6638             | 0.03188 | 69.54187       | 1.10847  | 6.89108 | 0.16261 | 0.10272 | 0.00273 | 215.7709 | 8.20907  | 40.45       | 1.52        |

|            |          |         |         |         |         |         |          |         |         |         |         |         |          |         |       |      |
|------------|----------|---------|---------|---------|---------|---------|----------|---------|---------|---------|---------|---------|----------|---------|-------|------|
| Integrated | 849.1751 | 7.32632 | 1.96393 | 0.05503 | 2.27644 | 0.02579 | 79.20037 | 0.58659 | 3.60854 | 0.10125 | 0.04412 | 0.00185 | 176.8644 | 5.22763 | 33.22 | 1.03 |
|------------|----------|---------|---------|---------|---------|---------|----------|---------|---------|---------|---------|---------|----------|---------|-------|------|

#### WHITE-15 WR#L1

Weighted average of J from standards = 1.052e-04 +/- 1.125e-06

| Laser Power<br>(mW) | Cumulative<br>39Ar | 40Ar/39Ar<br>meas. | +/-     | 37Ar/39Ar<br>meas. | +/-     | 36Ar/39Ar<br>meas. | +/-     | % Atm.<br>40Ar | +/-     | Ca/K    | +/-     | Cl/K    | +/-     | 40*/39K  | +/-     | Age<br>(Ma) | +/-<br>(Ma) |
|---------------------|--------------------|--------------------|---------|--------------------|---------|--------------------|---------|----------------|---------|---------|---------|---------|---------|----------|---------|-------------|-------------|
| 500                 | 0.06               | 177.4151           | 5.01745 | 0.51598            | 0.10594 | 0.42502            | 0.02176 | 70.7789        | 3.02476 | 0.94711 | 0.19454 | 0.00316 | 0.00286 | 51.85286 | 5.56684 | 9.8         | 1.05        |
| 1000                | 0.2971             | 82.35259           | 0.91575 | 0.36053            | 0.03237 | 0.07856            | 0.00533 | 28.16189       | 1.88808 | 0.66169 | 0.05943 | 0.00158 | 0.00093 | 59.15428 | 1.691   | 11.18       | 0.32        |
| 1500                | 0.4404             | 83.22079           | 1.16632 | 0.50218            | 0.03991 | 0.08966            | 0.00813 | 31.79702       | 2.85612 | 0.92176 | 0.07329 | 0.00029 | 0.00122 | 56.75894 | 2.51068 | 10.73       | 0.47        |
| 2000                | 0.613              | 75.06686           | 1.06355 | 0.47509            | 0.03563 | 0.06723            | 0.00674 | 26.42479       | 2.62999 | 0.87201 | 0.06543 | 0.00234 | 0.001   | 55.22728 | 2.12629 | 10.44       | 0.4         |
| 2500                | 0.7334             | 78.43881           | 1.29282 | 0.58498            | 0.04559 | 0.09349            | 0.01233 | 35.17261       | 4.6135  | 1.0738  | 0.08372 | 0.00382 | 0.00175 | 50.85159 | 3.71718 | 9.61        | 0.7         |
| 3000                | 0.8041             | 80.26944           | 1.2044  | 0.81809            | 0.09347 | 0.10289            | 0.01379 | 37.80599       | 5.04935 | 1.50196 | 0.1717  | 0.00387 | 0.0026  | 49.93317 | 4.12684 | 9.44        | 0.78        |
| 4000                | 0.8711             | 76.67621           | 1.34421 | 1.65903            | 0.08527 | 0.08395            | 0.01705 | 32.18744       | 6.55046 | 3.04767 | 0.15683 | 0.00513 | 0.00224 | 52.03696 | 5.1139  | 9.84        | 0.96        |
| 9000                | 1                  | 112.8218           | 1.88095 | 2.88739            | 0.07673 | 0.1937             | 0.01097 | 50.53515       | 2.75074 | 5.30878 | 0.14137 | 0.00305 | 0.00145 | 55.90648 | 3.25018 | 10.57       | 0.61        |

|            |          |         |         |         |        |         |          |         |         |         |         |         |          |         |       |      |
|------------|----------|---------|---------|---------|--------|---------|----------|---------|---------|---------|---------|---------|----------|---------|-------|------|
| Integrated | 89.85242 | 0.49879 | 0.88253 | 0.01871 | 0.1177 | 0.00347 | 38.64107 | 1.12242 | 1.62033 | 0.03438 | 0.00248 | 0.00052 | 55.14864 | 1.05558 | 10.42 | 0.23 |
|------------|----------|---------|---------|---------|--------|---------|----------|---------|---------|---------|---------|---------|----------|---------|-------|------|

**Note:**

Monitor mineral TCR with an age of 28.619 Ma (Renne et al., 2010) was used to monitor neutron flux and calculate ages.

**Reference:**

Renne, P.R., Mundil, R., Balco, G., Min, K., and Ludwig, K.R., 2010, Joint determination of  $^{40}\text{K}$  decay constants and  $^{40}\text{Ar}/^{40}\text{K}$  for the Fish Canyon sanidine standard, and improved accuracy for  $^{40}\text{Ar}/^{39}\text{Ar}$  geochronology: *Geochimica et Cosmochimica Acta*, v. 74, p. 5349.
